# Supplementary material for: Degeneration of the Nonrecombining Regions in the Mating-Type Chromosomes of the Anther-Smut Fungi
Source: PubMed Central journal article supplement — Mol Biol Evol. 2014 Dec 21;32(4):928–43. doi: 10.1093/molbev/msu396 (PMC4379399; doi:10.1093/molbev/msu396), 2014-12-21
Supplement: supp_msu396_FigS1_automixis.pdf [file supp_msu396_FigS1_automixis.pdf]

Diploid  
teliospore  
heterozygous  
at three loci  
including the  
mating type

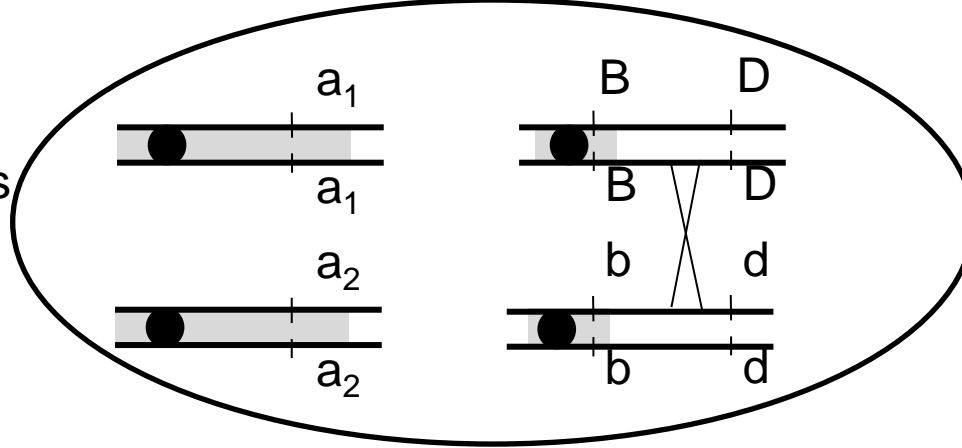

- centromere
- Suppressed recombination
- $a_1$  Mating type allele
- $b$  Haplo-lethal allele
- X Recombinaison

MEIOSIS I

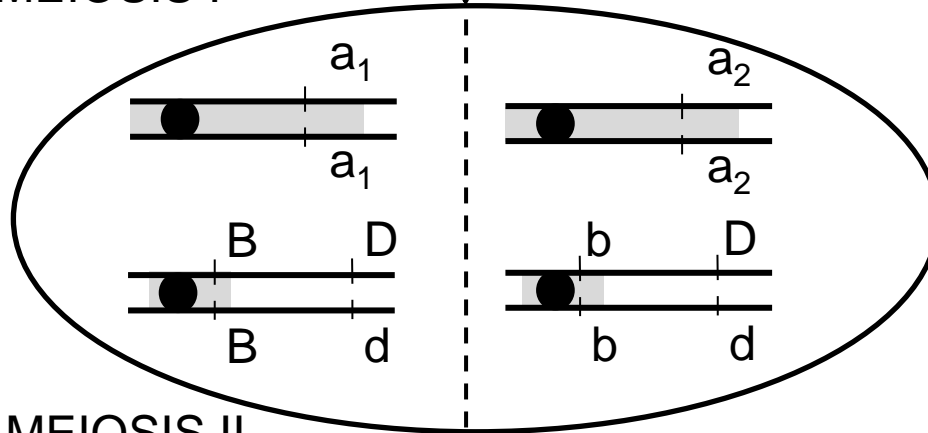

All loci linked to  
centromeres associate  
with the mating type as it  
segregates at meiosis I

MEIOSIS II

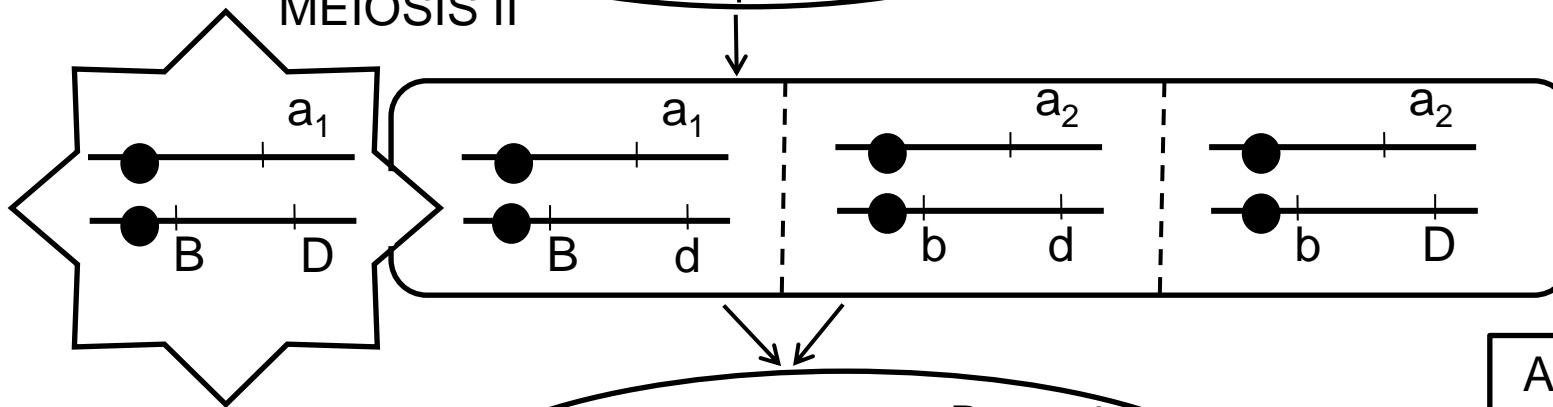

Aligned tetrad in  
a promycelium

INTRATETRAD  
MATING

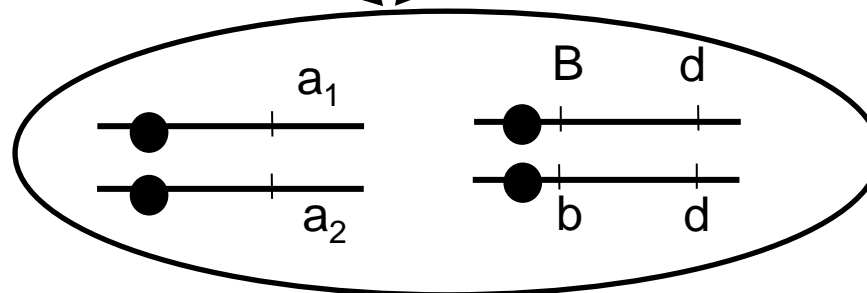

All heterozygosity linked  
to mating type loci and  
centromeres is therefore  
restored

**Figure S1:** Automixis in *Microbotryum*. As all loci linked to the centromere segregate at Meiosis 1 with the mating type, all heterozygosity at these loci are restored by intratetrad mating, occurring necessarily between cells of different mating type alleles. This shelters deleterious loci linked to centromeres as well as those linked to the mating type. Figure after Hood and Antonovics 2000.
