# Supplementary material for: Degeneration of the Nonrecombining Regions in the Mating-Type Chromosomes of the Anther-Smut Fungi
Source: PubMed Central journal article supplement — Mol Biol Evol. 2014 Dec 21;32(4):928–43. doi: 10.1093/molbev/msu396 (PMC4379399; doi:10.1093/molbev/msu396), 2014-12-21
Supplement: supp_msu396_FigS2_NRR_scaffod.pdf [file supp_msu396_FigS2_NRR_scaffod.pdf]

## Divergence between $a_1$ and $a_2$ alleles

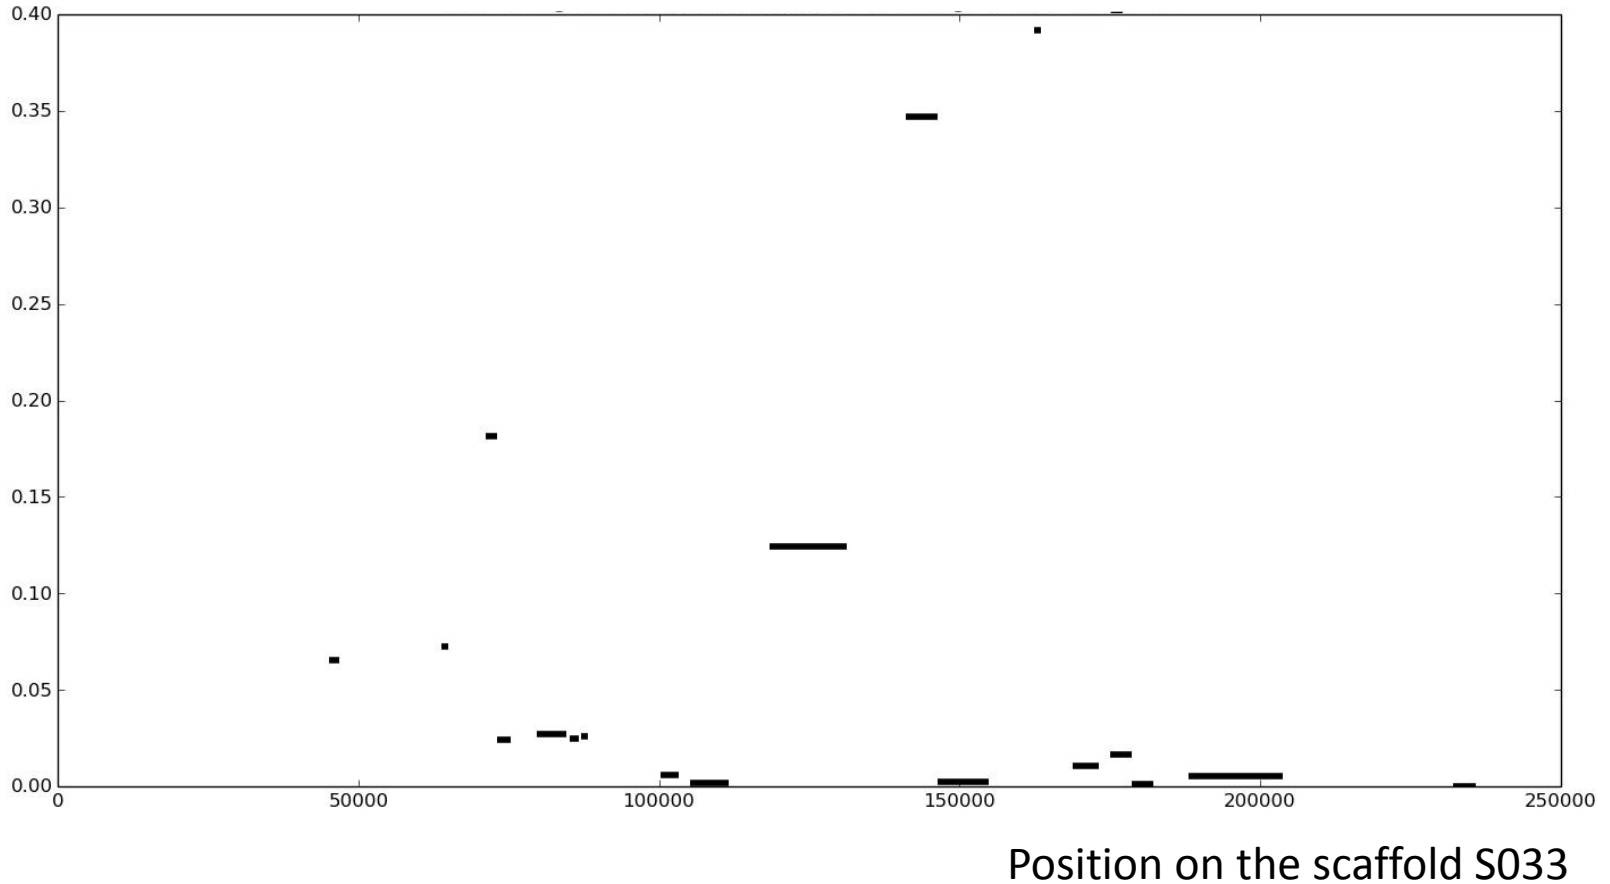

**Figure S2. Heterogeneity of synonymous divergence between the  $a_1$  and  $a_2$  alleles of the mating-type chromosomes in their non-recombining regions (NRRs).** Example of a scaffold (S033) in the NRRs with heterogeneity of synonymous divergence between the  $a_1$  and  $a_2$  alleles of *Microbotryum lychnidis-dioicae* exons (non transposable elements). The raw divergence is shown for alignable fragments of more than 1000 bp along the physical length of the scaffold.
