# Supplementary material for: Degeneration of the Nonrecombining Regions in the Mating-Type Chromosomes of the Anther-Smut Fungi
Source: PubMed Central journal article supplement — Mol Biol Evol. 2014 Dec 21;32(4):928–43. doi: 10.1093/molbev/msu396 (PMC4379399; doi:10.1093/molbev/msu396), 2014-12-21
Supplement: supp_msu396_FigS4_expression.pdf [file supp_msu396_FigS4_expression.pdf]

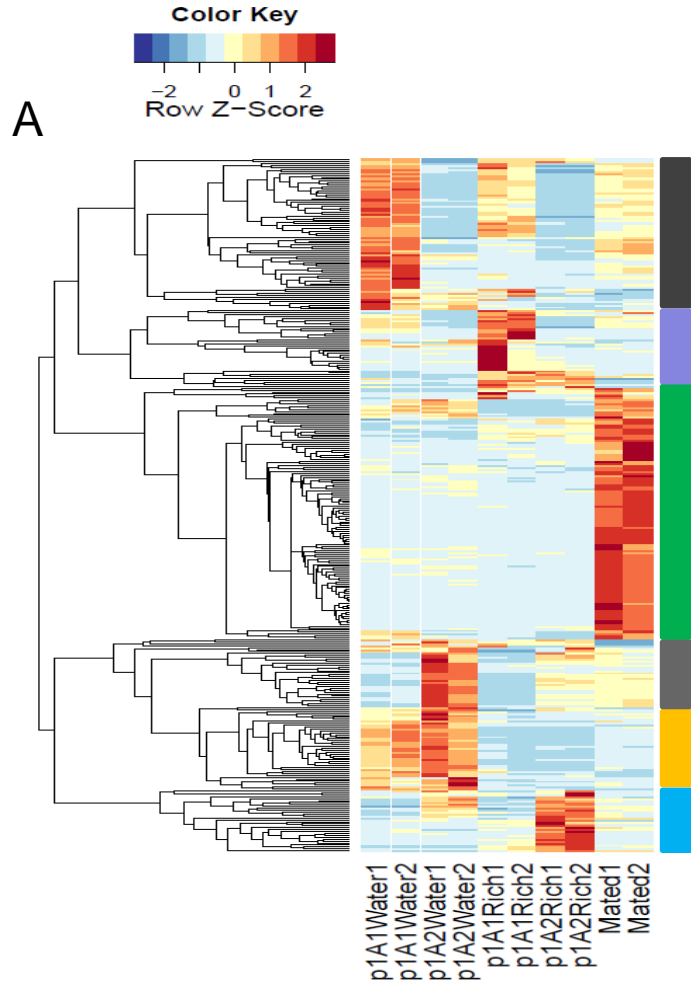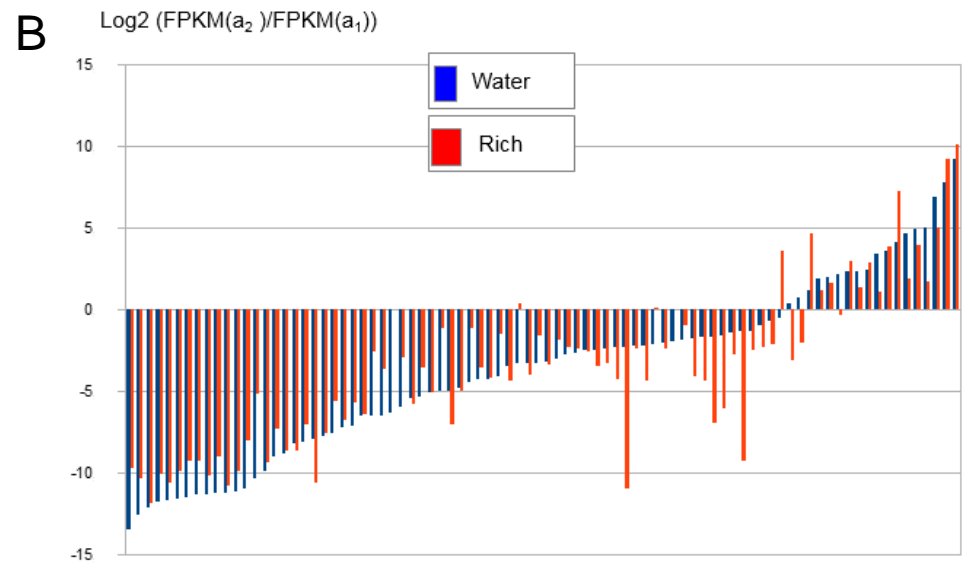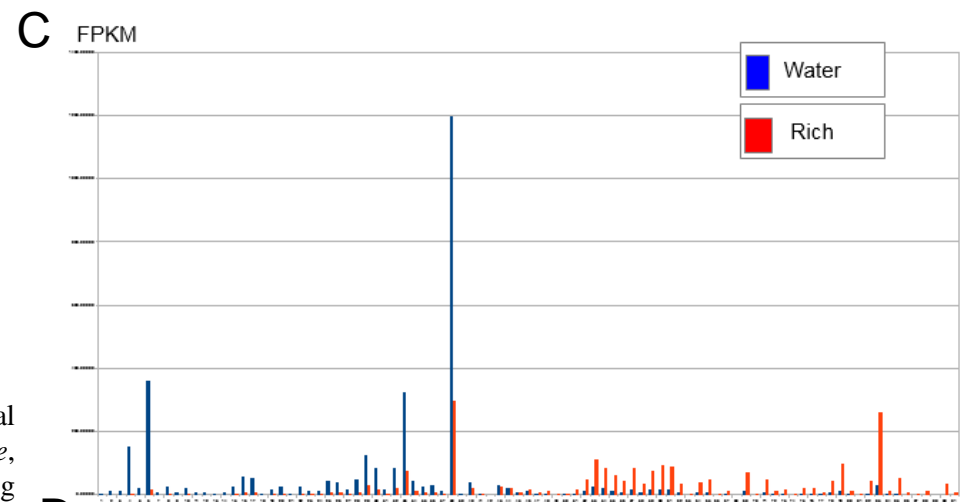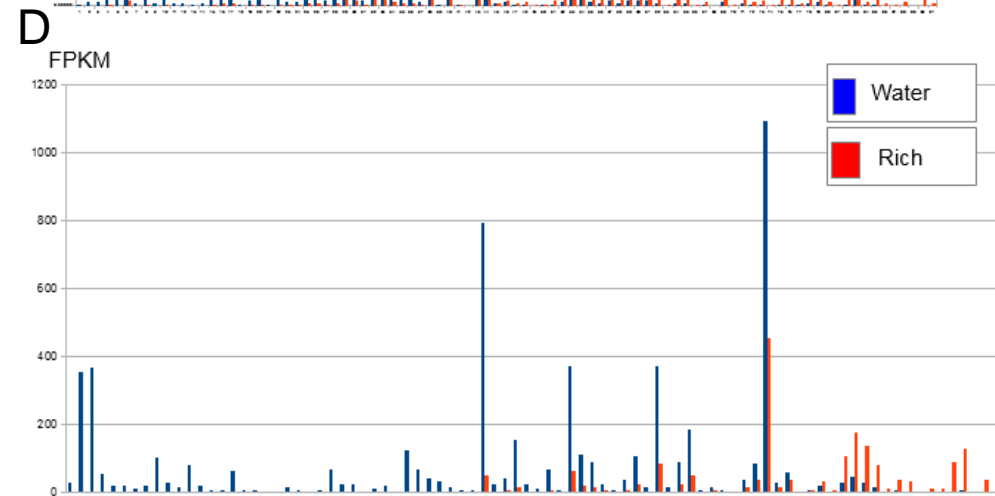

**Figure S4.** Expression data. **A)** Heatmap of differential gene expression for two biological replicates each of separated  $a_1$  and  $a_2$  haploid cultures of *Microbotryum lychnidis-dioicae*, assessed with separated  $a_1$  and  $a_2$  sporidia under conducive and non-conductive mating environments (*i.e.*, low nutrient water agar versus nutrient rich medium, respectively) and with mixed  $a_1$  and  $a_2$  sporidia under conducive mating environment. The expression profiles of differentially expressed genes were clustered using Euclidian distance and complete clustering; the resulting tree (left) illustrates the relationships of the five predominant clusters (right, colored bars these correspond to genes up-regulated in A1 vs A2 in water (brown) or in rich media (pink); up-regulated in mated cells (green); genes up-regulated in A2 vs A1 in water (purple) or in rich media (blue); and genes differentially expressed between A1 and A2, either in one media or both (yellow). **B)** Differential expression of the 177 genes identified in the  $a_1$  *Microbotryum lychnidis-dioicae* reference genome as differentially expressed between the two mating types (in  $a_2$  vs  $a_1$ ) on water agar (in blue) or in a rich medium (in red). The Y axis gives the  $\log_2$ Fold, *i.e.*, the log of the ratio of the FPKM (fragments per kilobase of exon per million fragments mapped, an absolute measure of expression) in  $a_2$  sporidia compared to that in  $a_1$  sporidia. A positive value means that the gene is more expressed in  $a_2$  sporidia and a negative value that the gene is more expressed in  $a_1$  sporidia. The genes are ordered according to increasing values of differential expression on water agar. **C)** Absolute expression (FPKM, fragments per kilobase of exon per million fragments mapped) of the 91 genes identified in the  $a_1$  *Microbotryum lychnidis-dioicae* reference genome as differentially expressed between the two mating types on water agar, in  $a_1$  (in blue) or in  $a_2$  (in red), and located on autosomes. The genes are ordered as in the Figure S3B. **D)** Absolute expression (FPKM, fragments per kilobase of exon per million fragments mapped) of the 86 genes identified in the  $a_1$  *Microbotryum lychnidis-dioicae* reference genome as differentially expressed between the two mating types on water agar, in  $a_1$  (in blue) or in  $a_2$  (in red), and located on the-mating type chromosome. The genes are ordered as in the Figure S3B.
