# Supplementary material for: Degeneration of the Nonrecombining Regions in the Mating-Type Chromosomes of the Anther-Smut Fungi
Source: PubMed Central journal article supplement — Mol Biol Evol. 2014 Dec 21;32(4):928–43. doi: 10.1093/molbev/msu396 (PMC4379399; doi:10.1093/molbev/msu396), 2014-12-21
Supplement: supp_msu396_TableS1_SUMMARY.pdf [file supp_msu396_TableS1_SUMMARY.pdf]

Table S1. Results for the site-model approach (PAML package) for each POG localized in non-mating-type chromosomes (non-MATs) (A), mating-type chromosome non-recombining regions (NRRs) (B) or mating-type chromosome recombining regions (MATRRs) (C). Statistics (likelihood ratio test) testing the selective model against the neutral model at the scale of a POG. When a selective scenario was found more likely than a neutral one, positive selection has been tested per site using BEB statistics. The total number of site inferred under positive selection in the full POG is given. Details on these sites (i.e., position and nature) are indicated in the next three columns which indicate the sites under significant positive selection, at the 5% , 1% column and 0.1% levels , respectively. In red are highlighted the POGs significantly supporting a selective scenario and displaying at least one site inferred to evolve under positive selection. D: summary , where the proportions of POGs displaying signatures of positive selection are compared between genomic compartments.

A

| Locus                                 | InL_Model_1a | InL_Model_2a | Delta 2*(InL2 - InL1) | p_value | Significance | BEB nb | [BEB 3*] | [BEB 2*]                                                                                                                    | [BEB 1*]                                                               | Annotation_Broad     | Annotation_ID | Annotation_Name                                 |
|---------------------------------------|--------------|--------------|-----------------------|---------|--------------|--------|----------|-----------------------------------------------------------------------------------------------------------------------------|------------------------------------------------------------------------|----------------------|---------------|-------------------------------------------------|
| Supercontig_1.50_MV<br>LG_04468_9sp   | -503,86002   | -483,07384   | 41,5724               | 1       | ***          | 28     | []       | ['5M', '7A', '9F', '15T', '20S', '29L', '31P', '36I', '39I', '41N', '42L', '43P', '44I', '45P', '48N', '49L', '54Y', '55P'] | ['10E', '16P', '23P', '24N', '28P', '30P', '34P', '35P', '52F', '53L'] | hypothetical protein | NA            | NA                                              |
| Supercontig_1.33_MV<br>LG_03478_11sp  | -1237,3816   | -1223,05     | 28,6632               | 1       | ***          | 6      | []       | ['22G', '97G']                                                                                                              | ['50D', '52A', '125D', '127A']                                         | hypothetical protein | PF00168.23    | C2(C2 domain)                                   |
| Supercontig_1.296_MV<br>LG_07235_9sp  | -972,99166   | -957,22363   | 31,5361               | 1       | ***          | 6      | []       | ['31R', '131P', '139L']                                                                                                     | ['41K', '104A', '138S']                                                | hypothetical protein | NA            | NA                                              |
| Supercontig_1.6_MVL<br>G_01067_12sp   | -464,18671   | -458,78645   | 10,8005               | 0,99548 | ***          | 6      | []       | ['38T']                                                                                                                     | ['2K', '5N', '16G', '52A', '54S']                                      | hypothetical protein | PF04882.5     | Peroxis-3(Peroxis-3)                            |
| Supercontig_1.713_MV<br>LG_07301_10sp | -567,94536   | -552,20972   | 31,4713               | 1       | ***          | 6      | []       | ['7N', '31W', '36V', '37P', '39N']                                                                                          | ['47L']                                                                | hypothetical protein | NA            | NA                                              |
| Supercontig_1.28_MV<br>LG_03199_10sp  | -502,93295   | -493,35526   | 19,1554               | 0,99993 | ***          | 5      | []       | ['11L', '35A', '38P']                                                                                                       | ['21V', '23R']                                                         | hypothetical protein | NA            | NA                                              |
| Supercontig_1.24_MV<br>LG_02872_6sp   | -521,31485   | -512,4641    | 17,7015               | 0,99986 | ***          | 5      | []       | ['19N', '39T']                                                                                                              | ['3A', '10Y', '11I']                                                   | hypothetical protein | PF00026.16    | Asp(Eukaryotic aspartyl protease)               |
| Supercontig_1.116_MV<br>LG_06380_12sp | -1331,5645   | -1309,1119   | 44,9053               | 1       | ***          | 5      | []       | ['19R', '38R', '105E', '107P', '118L']                                                                                      | []                                                                     | hypothetical protein | NA            | NA                                              |
| Supercontig_1.24_MV<br>LG_02865_10sp  | -787,04885   | -774,92944   | 24,2388               | 0,99999 | ***          | 4      | []       | ['35S', '46Y']                                                                                                              | ['60K', '61L']                                                         | hypothetical protein | NA            | NA                                              |
| Supercontig_1.21_MV<br>LG_02646_8sp   | -718,78491   | -707,40486   | 22,7601               | 0,99999 | ***          | 4      | []       | ['44L', '45D']                                                                                                              | ['48V', '81R']                                                         | hypothetical protein | NA            | NA                                              |
| Supercontig_1.154_MV<br>LG_06808_7sp  | -2182,7735   | -2175,2254   | 15,0962               | 0,99947 | ***          | 4      | []       | []                                                                                                                          | ['25H', '139A', '176H', '290A']                                        | hypothetical protein | PF07250.4     | Glyoxal_oxid_N(Glyoxal oxidase N-terminus)      |
| Supercontig_1.80_MV<br>LG_05664_7sp   | -667,63315   | -661,31397   | 12,6384               | 0,9982  | ***          | 4      | []       | []                                                                                                                          | ['28T', '31S', '40Q', '45N']                                           | hypothetical protein | PF00026.16    | Asp(Eukaryotic aspartyl protease)               |
| Supercontig_1.12_MV<br>LG_01848_10sp  | -609,86527   | -600,13188   | 19,4668               | 0,99994 | ***          | 3      | []       | ['18P']                                                                                                                     | ['34H', '35S']                                                         | hypothetical protein | NA            | NA                                              |
| Supercontig_1.3_MVL<br>G_00566_6sp    | -428,08467   | -417,14054   | 21,8883               | 0,99998 | ***          | 3      | []       | ['37G', '45K', '57E']                                                                                                       | []                                                                     | hypothetical protein | NA            | NA                                              |
| Supercontig_1.31_MV<br>LG_03333_7sp   | -567,28082   | -554,3271    | 25,9074               | 1       | ***          | 3      | []       | ['3L', '9L', '36A']                                                                                                         | []                                                                     | hypothetical protein | PF00538.12    | Linker_histone(linker histone H1 and H5 family) |
| Supercontig_1.10_MV<br>LG_01635_7sp   | -1289,4255   | -1277,9      | 23,0509               | 0,99999 | ***          | 3      | []       | ['43D']                                                                                                                     | ['81A', '83T']                                                         | hypothetical protein | NA            | NA                                              |

|                                       |            |            |         |         |     |   |   |                 |                        |                      |            |                                                                             |
|---------------------------------------|------------|------------|---------|---------|-----|---|---|-----------------|------------------------|----------------------|------------|-----------------------------------------------------------------------------|
| Supercontig_1.126_MV<br>LG_06525_10sp | -556,6503  | -544,92947 | 23,4417 | 0,99999 | *** | 3 | □ | ['4S', '15H']   | ['26R']                | hypothetical protein | NA         | NA                                                                          |
| Supercontig_1.113_MV<br>LG_06337_10sp | -1419,7298 | -1408,6681 | 22,1233 | 0,99998 | *** | 3 | □ | □               | ['45L', '88G', '166L'] | hypothetical protein | NA         | NA                                                                          |
| Supercontig_1.222_MV<br>LG_07164_6sp  | -455,10806 | -447,83449 | 14,5471 | 0,99931 | *** | 3 | □ | □               | ['8D', '41S', '45N']   | hypothetical protein | NA         | NA                                                                          |
| Supercontig_1.1_MVL<br>G_00256_9sp    | -1036,0069 | -1028,7522 | 14,5093 | 0,99929 | *** | 2 | □ | ['121I']        | ['76G']                | hypothetical protein | PF01470.10 | Peptidase_C15(Pyroglutamyl<br>peptidase)                                    |
| Supercontig_1.63_MV<br>LG_05046_9sp   | -1108,8088 | -1101,8946 | 13,8284 | 0,99901 | *** | 2 | □ | ['127A']        | ['54S']                | hypothetical protein | NA         | NA                                                                          |
| Supercontig_1.86_MV<br>LG_05819_9sp   | -1237,8036 | -1228,0393 | 19,5287 | 0,99994 | *** | 2 | □ | ['128R']        | ['13A']                | hypothetical protein | NA         | NA                                                                          |
| Supercontig_1.23_MV<br>LG_02763_7sp   | -1781,11   | -1770,9045 | 20,4108 | 0,99996 | *** | 2 | □ | ['156H']        | ['93Q']                | hypothetical protein | PF00082.15 | Peptidase_S8(Subtilase family)                                              |
| Supercontig_1.27_MV<br>LG_03067_10sp  | -471,29701 | -459,90025 | 22,7935 | 0,99999 | *** | 2 | □ | ['19R', '24Q']  | □                      | hypothetical protein | PF01697.20 | DUF23(Domain of unknown<br>function)                                        |
| Supercontig_1.8_MVL<br>G_01421_12sp   | -543,984   | -536,57678 | 14,8144 | 0,99939 | *** | 2 | □ | ['23G', '64G']  | □                      | hypothetical protein | NA         | NA                                                                          |
| Supercontig_1.11_MV<br>LG_01720_10sp  | -567,63938 | -561,5962  | 12,0864 | 0,99763 | *** | 2 | □ | ['23Q']         | ['62S']                | hypothetical protein | PF05303.5  | DUF727(Protein of unknown<br>function (DUF727))                             |
| Supercontig_1.31_MV<br>LG_03375_9sp   | -712,23177 | -706,80046 | 10,8626 | 0,99562 | *** | 2 | □ | ['24P']         | ['53A']                | hypothetical protein | NA         | NA                                                                          |
| Supercontig_1.16_MV<br>LG_02224_6sp   | -422,64083 | -416,37793 | 12,5258 | 0,99809 | *** | 2 | □ | ['24T']         | ['3G']                 | hypothetical protein | NA         | NA                                                                          |
| Supercontig_1.16_MV<br>LG_02165_11sp  | -476,39008 | -469,38551 | 14,0091 | 0,99909 | *** | 2 | □ | ['26S']         | ['24D']                | hypothetical protein | NA         | NA                                                                          |
| Supercontig_1.45_MV<br>LG_04219_8sp   | -500,70726 | -490,01178 | 21,391  | 0,99998 | *** | 2 | □ | ['27L']         | ['7R']                 | hypothetical protein | PF00645.11 | zf-PARP(Poly(ADP-ribose)<br>polymerase and DNA-Ligase Zn-<br>finger region) |
| Supercontig_1.48_MV<br>LG_04359_8sp   | -838,51942 | -831,68815 | 13,6625 | 0,99892 | *** | 2 | □ | ['27N']         | ['49Q']                | hypothetical protein | NA         | NA                                                                          |
| Supercontig_1.1_MVL<br>G_00121_10sp   | -1608,3178 | -1601,317  | 14,0016 | 0,99909 | *** | 2 | □ | ['28N', '136N'] | □                      | hypothetical protein | NA         | NA                                                                          |
| Supercontig_1.6_MVL<br>G_01163_10sp   | -697,19766 | -689,58769 | 15,2199 | 0,9995  | *** | 2 | □ | ['29M', '37K']  | □                      | hypothetical protein | PF01062.14 | Bestrophin(Bestrophin)                                                      |
| Supercontig_1.48_MV<br>LG_04353_8sp   | -759,43871 | -750,47602 | 17,9254 | 0,99987 | *** | 2 | □ | ['38A']         | ['35Q']                | hypothetical protein | PF07519.4  | Tannase(Tannase and feruloyl<br>esterase)                                   |
| Supercontig_1.2_MVL<br>G_00321_10sp   | -911,3591  | -897,1227  | 28,4728 | 1       | *** | 2 | □ | ['40Q', '98Q']  | □                      | hypothetical protein | NA         | NA                                                                          |
| Supercontig_1.2_MVL<br>G_00414_10sp   | -362,11244 | -356,5583  | 11,1083 | 0,99613 | *** | 2 | □ | ['48P']         | ['49G']                | hypothetical protein | PF00150.11 | Cellulase(Cellulase (glycosyl<br>hydrolase family 5))                       |
| Supercontig_1.91_MV<br>LG_05932_10sp  | -533,37286 | -523,15492 | 20,4359 | 0,99996 | *** | 2 | □ | ['52K', '58A']  | □                      | hypothetical protein | PF01184.12 | Grp1_Fun34_YaaH(GPR1/FUN3<br>4/yaaH family)                                 |
| Supercontig_1.13_MV<br>LG_01896_10sp  | -1144,3283 | -1136,4869 | 15,6829 | 0,99961 | *** | 2 | □ | ['55D', '61A']  | □                      | hypothetical protein | TIGR00756  | TIGR00756(PPR:<br>pentatricopeptide repeat domain)                          |
| Supercontig_1.88_MV<br>LG_05893_7sp   | -1001,0235 | -992,91269 | 16,2216 | 0,9997  | *** | 2 | □ | ['64D', '66G']  | □                      | hypothetical protein | PF04046.9  | PSP(PSP)                                                                    |
| Supercontig_1.24_MV<br>LG_02869_7sp   | -563,38873 | -554,44728 | 17,8829 | 0,99987 | *** | 2 | □ | ['7S', '56L']   | □                      | hypothetical protein | NA         | NA                                                                          |
| Supercontig_1.47_MV<br>LG_04349_10sp  | -739,62609 | -733,1459  | 12,9604 | 0,99847 | *** | 2 | □ | ['80T']         | ['73L']                | hypothetical protein | NA         | NA                                                                          |

|                                       |            |            |         |         |     |   |   |               |                  |                             |            |                                                                |
|---------------------------------------|------------|------------|---------|---------|-----|---|---|---------------|------------------|-----------------------------|------------|----------------------------------------------------------------|
| Supercontig_1.86_MV<br>LG_05837_8sp   | -1543,0008 | -1536,3584 | 13,2848 | 0,9987  | *** | 2 | □ | ['87E']       | ['69G']          | hypothetical protein        | PF00097.18 | zf-C3HC4(Zinc finger, C3HC4 type (RING finger))                |
| Supercontig_1.203_MV<br>LG_07099_7sp  | -795,42931 | -790,1982  | 10,4622 | 0,99465 | *** | 2 | □ | ['89S']       | ['54I']          | hypothetical protein        | NA         | NA                                                             |
| Supercontig_1.11_MV<br>LG_01694_11sp  | -569,48294 | -563,60609 | 11,7537 | 0,9972  | *** | 2 | □ | ['8S', '44S'] | □                | hypothetical protein        | PF03215.8  | Rad17(Rad17 cell cycle checkpoint protein)                     |
| Supercontig_1.122_MV<br>LG_06457_7sp  | -815,60259 | -807,98372 | 15,2377 | 0,99951 | *** | 2 | □ | ['8T']        | ['39K']          | hypothetical protein        | PF01585.16 | G-patch(G-patch domain)                                        |
| Supercontig_1.16_MV<br>LG_02208_6sp   | -441,70311 | -435,49625 | 12,4137 | 0,99798 | *** | 2 | □ | □             | ['12K', '35N']   | hypothetical protein        | NA         | NA                                                             |
| Supercontig_1.113_MV<br>LG_06351_8sp  | -479,6288  | -472,72927 | 13,7991 | 0,99899 | *** | 2 | □ | □             | ['15R', '52R']   | hypothetical protein        | PF09649.3  | CHZ(Histone chaperone domain CHZ)                              |
| Supercontig_1.81_MV<br>LG_05673_10sp  | -1033,2766 | -1027,9189 | 10,7154 | 0,99529 | *** | 2 | □ | □             | ['15T', '78T']   | hypothetical protein        | PF07818.6  | HCNGP(HCNGP-like protein)                                      |
| Supercontig_1.7_MVL<br>G_01314_8sp    | -2247,7552 | -2242,1514 | 11,2076 | 0,99632 | *** | 2 | □ | □             | ['164R', '329R'] | hypothetical protein        | PF00097.18 | zf-C3HC4(Zinc finger, C3HC4 type (RING finger))                |
| Supercontig_1.1_MVL<br>G_00012_10sp   | -623,41063 | -616,60196 | 13,6173 | 0,9989  | *** | 2 | □ | □             | ['17E', '52E']   | hypothetical protein        | PF01067.15 | Calpain_III(Calpain large subunit, domain III)                 |
| Supercontig_1.1_MVL<br>G_00096_10sp   | -875,1454  | -868,82971 | 12,6314 | 0,99819 | *** | 2 | □ | □             | ['20P', '50P']   | hypothetical protein        | PF00076.15 | RRM_1(RNA recognition motif. (a.k.a. RRM, RBD, or RNP domain)) |
| Supercontig_1.4_MVL<br>G_00718_11sp   | -1086,2726 | -1080,7421 | 11,0609 | 0,99604 | *** | 2 | □ | □             | ['31A', '106A']  | hypothetical protein        | PF01553.14 | Acyltransferase(Acyltransferase)                               |
| Supercontig_1.80_MV<br>LG_05641_9sp   | -840,86729 | -834,69986 | 12,3349 | 0,9979  | *** | 2 | □ | □             | ['32P', '111S']  | hypothetical protein        | PF03492.8  | Methyltransf_7(SAM dependent carboxyl methyltransferase)       |
| Supercontig_1.44_MV<br>LG_04150_6sp   | -882,46362 | -873,60817 | 17,7109 | 0,99986 | *** | 2 | □ | □             | ['3Q', '38T']    | hypothetical protein        | NA         | NA                                                             |
| Supercontig_1.31_MV<br>LG_03368_6sp   | -490,41947 | -485,24056 | 10,3578 | 0,99437 | *** | 2 | □ | □             | ['45A', '51L']   | hypothetical protein        | NA         | NA                                                             |
| Supercontig_1.110_MV<br>LG_06292_11sp | -797,45318 | -792,28741 | 10,3315 | 0,99429 | *** | 2 | □ | □             | ['45F', '104F']  | hypothetical protein        | PF00083.17 | Sugar_tr(Sugar (and other) transporter)                        |
| Supercontig_1.85_MV<br>LG_05804_10sp  | -553,78109 | -548,19844 | 11,1653 | 0,99624 | *** | 2 | □ | □             | ['47A', '50K']   | hypothetical protein        | NA         | NA                                                             |
| Supercontig_1.66_MV<br>LG_05181_10sp  | -1404,5814 | -1398,4932 | 12,1763 | 0,99773 | *** | 2 | □ | □             | ['57R', '148R']  | hypothetical protein        | PF01068.14 | DNA_ligase_A_M(ATP dependent DNA ligase domain)                |
| Supercontig_1.54_MV<br>LG_04666_6sp   | -904,01692 | -897,47464 | 13,0846 | 0,99856 | *** | 2 | □ | □             | ['61T', '79E']   | hypothetical protein        | NA         | NA                                                             |
| Supercontig_1.22_MV<br>LG_02726_10sp  | -1521,8744 | -1516,4297 | 10,8895 | 0,99568 | *** | 2 | □ | □             | ['69A', '160A']  | hypothetical protein        | PF03330.11 | DPBB_1(Rare lipoprotein A (RlpA)-like double-psi beta-barrel)  |
| Supercontig_1.15_MV<br>LG_02117_10sp  | -557,87212 | -550,85371 | 14,0368 | 0,9991  | *** | 2 | □ | □             | ['6S', '13S']    | 60S ribosomal protein L27-B | PF01777.11 | Ribosomal_L27e(Ribosomal L27e protein family)                  |
| Supercontig_1.18_MV<br>LG_02415_9sp   | -983,30943 | -977,71337 | 11,1921 | 0,99629 | *** | 1 | □ | ['111Q']      | □                | hypothetical protein        | PF12621.1  | DUF3779(Phosphate metabolism protein)                          |
| Supercontig_1.21_MV<br>LG_02680_7sp   | -803,1166  | -798,37008 | 9,49304 | 0,99132 | *** | 1 | □ | ['115V']      | □                | hypothetical protein        | NA         | NA                                                             |
| Supercontig_1.30_MV<br>LG_03285_12sp  | -548,64727 | -543,8411  | 9,61234 | 0,99182 | *** | 1 | □ | ['11I']       | □                | hypothetical protein        | PF00632.18 | HECT(HECT-domain (ubiquitin-transferase))                      |

|                                       |            |            |         |         |     |   |   |          |   |                                                |            |                                                                                     |
|---------------------------------------|------------|------------|---------|---------|-----|---|---|----------|---|------------------------------------------------|------------|-------------------------------------------------------------------------------------|
| Supercontig_1.28_MV<br>LG_03161_11sp  | -616,57859 | -608,34343 | 16,4703 | 0,99973 | *** | 1 | □ | ['11L']  | □ | hypothetical protein                           | TIGR00727  | TIGR00727(ISP4_OPT: small oligopeptide transporter, OPT family)                     |
| Supercontig_1.100_MV<br>LG_06138_10sp | -1273,9688 | -1267,2683 | 13,4011 | 0,99877 | *** | 1 | □ | ['129R'] | □ | hypothetical protein                           | NA         | NA                                                                                  |
| Supercontig_1.78_MV<br>LG_05599_7sp   | -933,88771 | -928,5134  | 10,7486 | 0,99537 | *** | 1 | □ | ['131N'] | □ | hypothetical protein                           | PF00560.26 | LRR_1(Leucine Rich Repeat)                                                          |
| Supercontig_1.48_MV<br>LG_04396_8sp   | -842,35101 | -836,43316 | 11,8357 | 0,99731 | *** | 1 | □ | ['13R']  | □ | hypothetical protein                           | PF03571.8  | Peptidase_M49(Peptidase family M49)                                                 |
| Supercontig_1.9_MVL<br>G_01501_11sp   | -434,32209 | -428,97769 | 10,6888 | 0,99523 | *** | 1 | □ | ['15A']  | □ | hypothetical protein                           | PF00916.13 | Sulfate_transp(Sulfate transporter family)                                          |
| Supercontig_1.13_MV<br>LG_01931_8sp   | -918,54231 | -913,17342 | 10,7378 | 0,99534 | *** | 1 | □ | ['15G']  | □ | hypothetical protein                           | TIGR00229  | TIGR00229(sensory_box: PAS domain S-box protein)                                    |
| Supercontig_1.78_MV<br>LG_05592_11sp  | -660,68565 | -655,58787 | 10,1956 | 0,99389 | *** | 1 | □ | ['17S']  | □ | hypothetical protein                           | PF03151.9  | TPT(Triose-phosphate Transporter family)                                            |
| Supercontig_1.20_MV<br>LG_02576_6sp   | -1165,4458 | -1156,5994 | 17,6928 | 0,99986 | *** | 1 | □ | ['185C'] | □ | hypothetical protein                           | PF00096.19 | zf-C2H2(Zinc finger, C2H2 type)                                                     |
| Supercontig_1.9_MVL<br>G_01499_8sp    | -786,31682 | -777,97072 | 16,6922 | 0,99976 | *** | 1 | □ | ['21T']  | □ | hypothetical protein                           | PF00294.17 | PfkB(pfkB family carbohydrate kinase)                                               |
| Supercontig_1.16_MV<br>LG_02246_10sp  | -678,52408 | -672,42242 | 12,2033 | 0,99776 | *** | 1 | □ | ['22N']  | □ | hypothetical protein                           | PF00797.10 | Acetyltransf_2(N-acetyltransferase)                                                 |
| Supercontig_1.19_MV<br>LG_02508_10sp  | -581,88374 | -576,90843 | 9,95062 | 0,99309 | *** | 1 | □ | ['24A']  | □ | hypothetical protein                           | TIGR00907  | TIGR00907(2A0304: amino acid permease)                                              |
| Supercontig_1.80_MV<br>LG_05662_10sp  | -752,62949 | -744,2871  | 16,6848 | 0,99976 | *** | 1 | □ | ['27Q']  | □ | hypothetical protein                           | PF00172.11 | Zn_clus(Fungal Zn(2)-Cys(6) binuclear cluster domain)                               |
| Supercontig_1.48_MV<br>LG_04366_12sp  | -559,7212  | -554,18963 | 11,0631 | 0,99604 | *** | 1 | □ | ['30P']  | □ | hypothetical protein                           | PF05577.5  | Peptidase_S28(Serine carboxypeptidase S28)                                          |
| Supercontig_1.48_MV<br>LG_04368_12sp  | -495,63218 | -488,7388  | 13,7868 | 0,99899 | *** | 1 | □ | ['32K']  | □ | hypothetical protein                           | PF01161.13 | PBP(Phosphatidylethanolamine-binding protein)                                       |
| Supercontig_1.22_MV<br>LG_02685_9sp   | -692,19596 | -686,34144 | 11,709  | 0,99713 | *** | 1 | □ | ['37N']  | □ | hypothetical protein                           | PF00172.11 | Zn_clus(Fungal Zn(2)-Cys(6) binuclear cluster domain)                               |
| Supercontig_1.150_MV<br>LG_06779_9sp  | -439,08155 | -431,66156 | 14,84   | 0,9994  | *** | 1 | □ | ['3T']   | □ | hypothetical protein                           | PF09597.3  | IGR(IGR protein motif)                                                              |
| Supercontig_1.82_MV<br>LG_05724_8sp   | -488,08031 | -483,41493 | 9,33076 | 0,99058 | *** | 1 | □ | ['40V']  | □ | hypothetical protein                           | PF08240.5  | ADH_N(Alcohol dehydrogenase GroES-like domain)                                      |
| Supercontig_1.1_MVL<br>G_00044_9sp    | -397,71628 | -392,98845 | 9,45566 | 0,99115 | *** | 1 | □ | ['43E']  | □ | methylenetetrahydrofolate dehydrogenase (NAD+) | PF02882.12 | THF_DHG_CYH_C(Tetrahydrofolate dehydrogenase/cyclohydrolase, NAD(P)-binding domain) |
| Supercontig_1.6_MVL<br>G_01214_6sp    | -506,0491  | -500,8738  | 10,3506 | 0,99435 | *** | 1 | □ | ['44I']  | □ | hypothetical protein                           | PF10263.2  | SprT-like(SprT-like family)                                                         |
| Supercontig_1.95_MV<br>LG_06022_12sp  | -497,05429 | -491,8084  | 10,4918 | 0,99473 | *** | 1 | □ | ['46L']  | □ | hypothetical protein                           | PF00225.16 | Kinesin(Kinesin motor domain)                                                       |
| Supercontig_1.33_MV<br>LG_03452_8sp   | -424,52833 | -419,10506 | 10,8465 | 0,99559 | *** | 1 | □ | ['46T']  | □ | hypothetical protein                           | PF01494.12 | FAD_binding_3(FAD binding domain)                                                   |
| Supercontig_1.20_MV<br>LG_02572_11sp  | -745,25338 | -740,22731 | 10,0521 | 0,99344 | *** | 1 | □ | ['47V']  | □ | hypothetical protein                           | PF01266.17 | DAO(FAD dependent oxidoreductase)                                                   |
| Supercontig_1.33_MV<br>LG_03470_6sp   | -523,44274 | -515,20442 | 16,4766 | 0,99974 | *** | 1 | □ | ['4K']   | □ | hypothetical protein                           | NA         | NA                                                                                  |
| Supercontig_1.27_MV<br>LG_03084_7sp   | -628,3948  | -623,64656 | 9,49648 | 0,99133 | *** | 1 | □ | ['51K']  | □ | histone H2B                                    | PF00125.17 | Histone(Core histone H2A/H2B/H3/H4)                                                 |

|                                      |            |            |         |         |     |   |   |         |          |                                 |            |                                                       |
|--------------------------------------|------------|------------|---------|---------|-----|---|---|---------|----------|---------------------------------|------------|-------------------------------------------------------|
| Supercontig_1.40_MV<br>LG_03952_9sp  | -398,42057 | -392,3833  | 12,0745 | 0,99761 | *** | 1 | □ | ['52S'] | □        | hypothetical protein            | NA         | NA                                                    |
| Supercontig_1.7_MVL<br>G_01234_9sp   | -444,04324 | -438,86222 | 10,362  | 0,99438 | *** | 1 | □ | ['53R'] | □        | hypothetical protein            | PF10294.2  | Methyltransf_16(Putative methyltransferase)           |
| Supercontig_1.1_MVL<br>G_00170_9sp   | -558,21584 | -550,4912  | 15,4493 | 0,99956 | *** | 1 | □ | ['56G'] | □        | ATP-dependent RNA helicase DED1 | PF00270.22 | DEAD(DEAD/DEAH box helicase)                          |
| Supercontig_1.61_MV<br>LG_04964_8sp  | -506,06201 | -500,51712 | 11,0898 | 0,99609 | *** | 1 | □ | ['64T'] | □        | hypothetical protein            | NA         | NA                                                    |
| Supercontig_1.112_MV<br>LG_06325_9sp | -516,26636 | -511,08398 | 10,3648 | 0,99439 | *** | 1 | □ | ['65E'] | □        | hypothetical protein            | PF05208.6  | ALG3(ALG3 protein)                                    |
| Supercontig_1.35_MV<br>LG_03593_8sp  | -527,22735 | -521,90364 | 10,6474 | 0,99513 | *** | 1 | □ | ['66H'] | □        | hypothetical protein            | NA         | NA                                                    |
| Supercontig_1.13_MV<br>LG_01973_10sp | -781,70768 | -776,47518 | 10,465  | 0,99466 | *** | 1 | □ | ['6G']  | □        | hypothetical protein            | PF04652.9  | DUF605(Vta1 like)                                     |
| Supercontig_1.2_MVL<br>G_00459_12sp  | -737,58052 | -732,95547 | 9,2501  | 0,9902  | *** | 1 | □ | ['72H'] | □        | hypothetical protein            | PF04762.5  | IKI3(IKI3 family)                                     |
| Supercontig_1.181_MV<br>LG_07009_9sp | -773,37618 | -766,17371 | 14,4049 | 0,99926 | *** | 1 | □ | ['89K'] | □        | hypothetical protein            | NA         | NA                                                    |
| Supercontig_1.40_MV<br>LG_03903_6sp  | -527,42086 | -522,44716 | 9,9474  | 0,99308 | *** | 1 | □ | ['8K']  | □        | hypothetical protein            | PF00026.16 | Asp(Eukaryotic aspartyl protease)                     |
| Supercontig_1.83_MV<br>LG_05748_10sp | -1020,863  | -1015,6383 | 10,4494 | 0,99462 | *** | 1 | □ | ['93L'] | □        | hypothetical protein            | PF00149.21 | Metallophos(Calcineurin-like phosphoesterase)         |
| Supercontig_1.3_MVL<br>G_00579_9sp   | -775,18843 | -768,41442 | 13,548  | 0,99886 | *** | 1 | □ | ['97I'] | □        | hypothetical protein            | NA         | NA                                                    |
| Supercontig_1.5_MVL<br>G_00961_6sp   | -1314,6109 | -1306,69   | 15,8418 | 0,99964 | *** | 1 | □ | □       | ['108T'] | hypothetical protein            | TIGR00820  | TIGR00820(zip: ZIP zinc/iron transport family)        |
| Supercontig_1.21_MV<br>LG_02628_6sp  | -810,54287 | -802,32723 | 16,4313 | 0,99973 | *** | 1 | □ | □       | ['123S'] | hypothetical protein            | PF00172.11 | Zn_clus(Fungal Zn(2)-Cys(6) binuclear cluster domain) |
| Supercontig_1.11_MV<br>LG_01793_6sp  | -618,26385 | -613,59175 | 9,3442  | 0,99065 | *** | 1 | □ | □       | ['17A']  | hypothetical protein            | PF00111.20 | Fer2(2Fe-2S iron-sulfur cluster binding domain)       |
| Supercontig_1.4_MVL<br>G_00783_7sp   | -624,68466 | -619,1216  | 11,1261 | 0,99616 | *** | 1 | □ | □       | ['18S']  | hypothetical protein            | NA         | NA                                                    |
| Supercontig_1.49_MV<br>LG_04418_7sp  | -758,73657 | -753,90948 | 9,65418 | 0,99199 | *** | 1 | □ | □       | ['1S']   | hypothetical protein            | PF00026.16 | Asp(Eukaryotic aspartyl protease)                     |
| Supercontig_1.53_MV<br>LG_04615_10sp | -373,15781 | -368,53384 | 9,24794 | 0,99019 | *** | 1 | □ | □       | ['34A']  | 40S ribosomal protein           | PF07650.10 | KH_2(KH domain)                                       |
| Supercontig_1.26_MV<br>LG_03024_10sp | -589,03878 | -583,20715 | 11,6633 | 0,99707 | *** | 1 | □ | □       | ['35R']  | hypothetical protein            | NA         | NA                                                    |
| Supercontig_1.39_MV<br>LG_03871_6sp  | -427,78077 | -422,93001 | 9,70152 | 0,99218 | *** | 1 | □ | □       | ['36L']  | hypothetical protein            | NA         | NA                                                    |
| Supercontig_1.10_MV<br>LG_01647_8sp  | -397,92464 | -393,2659  | 9,31748 | 0,99052 | *** | 1 | □ | □       | ['37S']  | hypothetical protein            | NA         | NA                                                    |
| Supercontig_1.26_MV<br>LG_03033_10sp | -834,66265 | -829,76454 | 9,79622 | 0,99254 | *** | 1 | □ | □       | ['43L']  | hypothetical protein            | PF04193.7  | PQ-loop(PQ loop repeat)                               |
| Supercontig_1.25_MV<br>LG_02949_8sp  | -598,86009 | -593,31845 | 11,0833 | 0,99608 | *** | 1 | □ | □       | ['45G']  | hypothetical protein            | NA         | NA                                                    |
| Supercontig_1.39_MV<br>LG_03874_10sp | -1098,177  | -1093,1405 | 10,0729 | 0,9935  | *** | 1 | □ | □       | ['56I']  | hypothetical protein            | PF07724.7  | AAA_2(AAA domain (Cdc48 subfamily))                   |
| Supercontig_1.88_MV<br>LG_05881_7sp  | -769,52989 | -764,4284  | 10,203  | 0,99391 | *** | 1 | □ | □       | ['74G']  | hypothetical protein            | PF02112.8  | PDEase_II(cAMP phosphodiesterases class-II)           |
| Supercontig_1.23_MV<br>LG_02781_8sp  | -694,2602  | -689,07237 | 10,3757 | 0,99442 | *** | 1 | □ | □       | ['74R']  | hypothetical protein            | PF00069.18 | Pkinase(Protein kinase domain)                        |

|                                      |            |            |         |         |     |   |   |          |                             |                                          |            |                                                                                   |
|--------------------------------------|------------|------------|---------|---------|-----|---|---|----------|-----------------------------|------------------------------------------|------------|-----------------------------------------------------------------------------------|
| Supercontig_1.60_MV<br>LG_04931_10sp | -684,61677 | -678,42709 | 12,3794 | 0,99795 | *** | 1 | □ | □        | ['7A']                      | hypothetical protein                     | NA         | NA                                                                                |
| Supercontig_1.31_MV<br>LG_03367_9sp  | -1011,4964 | -1005,7905 | 11,4117 | 0,99667 | *** | 1 | □ | □        | ['85V']                     | hypothetical protein                     | NA         | NA                                                                                |
| Supercontig_1.17_MV<br>LG_02280_7sp  | -856,35086 | -851,56405 | 9,57362 | 0,99166 | *** | 1 | □ | □        | ['87K']                     | hypothetical protein                     | NA         | NA                                                                                |
| Supercontig_1.45_MV<br>LG_04200_6sp  | -567,404   | -562,13919 | 10,5296 | 0,99483 | *** | 1 | □ | □        | ['9K']                      | hypothetical protein                     | PF05093.6  | CIAPIN1(Cytokine-induced anti-apoptosis inhibitor 1, Fe-S biogenesis)             |
| Supercontig_1.65_MV<br>LG_05141_6sp  | -454,41614 | -449,9036  | 9,02508 | 0,98903 | **  | 5 | □ | ['30S']  | ['8L', '20E', '26D', '42V'] | hypothetical protein                     | NA         | NA                                                                                |
| Supercontig_1.3_MVL<br>G_00513_9sp   | -417,02003 | -412,51809 | 9,00388 | 0,98891 | **  | 2 | □ | ['1E']   | ['5E']                      | hypothetical protein                     | NA         | NA                                                                                |
| Supercontig_1.24_MV<br>LG_02883_12sp | -424,21689 | -420,05785 | 8,31808 | 0,98438 | **  | 2 | □ | ['9G']   | ['20V']                     | hypothetical protein                     | NA         | NA                                                                                |
| Supercontig_1.13_MV<br>LG_01961_7sp  | -1537,6998 | -1534,1412 | 7,11726 | 0,97152 | **  | 2 | □ | □        | ['102I', '130Y']            | hypothetical protein                     | TIGR00229  | TIGR00229(sensory_box: PAS domain S-box protein)                                  |
| Supercontig_1.3_MVL<br>G_00607_10sp  | -1622,6712 | -1618,1432 | 9,05602 | 0,9892  | **  | 2 | □ | □        | ['146N', '191S']            | hypothetical protein                     | PF07500.7  | TFIIS_M(Transcription factor S-II (TFIIS), central domain)                        |
| Supercontig_1.46_MV<br>LG_04271_8sp  | -1275,6482 | -1272,019  | 7,25844 | 0,97346 | **  | 2 | □ | □        | ['16V', '132V']             | hypothetical protein                     | PF08689.3  | Med5(Mediator complex subunit Med5)                                               |
| Supercontig_1.82_MV<br>LG_05725_8sp  | -747,35331 | -743,02186 | 8,6629  | 0,98685 | **  | 2 | □ | □        | ['31T', '53E']              | hypothetical protein                     | PF03134.12 | TB2_DP1_HVA22(TB2/DP1, HVA22 family)                                              |
| Supercontig_1.34_MV<br>LG_03543_11sp | -1221,9563 | -1217,3581 | 9,19646 | 0,98993 | **  | 2 | □ | □        | ['7A', '90A']               | hypothetical protein                     | NA         | NA                                                                                |
| Supercontig_1.8_MVL<br>G_01410_9sp   | -997,75797 | -993,20653 | 9,10288 | 0,98945 | **  | 2 | □ | □        | ['7K', '13A']               | hypothetical protein                     | PF03813.7  | Nrap(Nrap protein)                                                                |
| Supercontig_1.14_MV<br>LG_01977_9sp  | -1516,3105 | -1512,0596 | 8,50184 | 0,98575 | **  | 2 | □ | □        | ['8R', '152R']              | alpha,alpha-trehalose-phosphate synthase | TIGR02400  | TIGR02400(trehalose_OtsA: alpha,alpha-trehalose-phosphate synthase (UDP-forming)) |
| Supercontig_1.25_MV<br>LG_02986_12sp | -431,99458 | -427,6844  | 8,62036 | 0,98657 | **  | 2 | □ | □        | ['8T', '33I']               | hypothetical protein                     | PF00560.26 | LRR_1(Leucine Rich Repeat)                                                        |
| Supercontig_1.140_MV<br>LG_06676_7sp | -1162,682  | -1159,1021 | 7,15974 | 0,97212 | **  | 2 | □ | □        | ['9Q', '57Q']               | hypothetical protein                     | PF00270.22 | DEAD(DEAD/DEAH box helicase)                                                      |
| Supercontig_1.57_MV<br>LG_04833_12sp | -845,139   | -841,15648 | 7,96504 | 0,98136 | **  | 1 | □ | ['106A'] | □                           | hypothetical protein                     | PF10345.2  | Cohesin_load(Cohesin loading factor)                                              |
| Supercontig_1.38_MV<br>LG_03816_9sp  | -1044,3239 | -1039,7529 | 9,14204 | 0,98965 | **  | 1 | □ | ['119R'] | □                           | hypothetical protein                     | NA         | NA                                                                                |
| Supercontig_1.32_MV<br>LG_03415_7sp  | -1245,2648 | -1242,0162 | 6,49722 | 0,96117 | **  | 1 | □ | ['146S'] | □                           | hypothetical protein                     | PF00070.20 | Pyr_redox(Pyridine nucleotide-disulphide oxidoreductase)                          |
| Supercontig_1.5_MVL<br>G_00892_10sp  | -450,29847 | -445,88731 | 8,82232 | 0,98786 | **  | 1 | □ | ['18F']  | □                           | hypothetical protein                     | PF00795.15 | CN_hydrolase(Carbon-nitrogen hydrolase)                                           |
| Supercontig_1.34_MV<br>LG_03539_10sp | -396,90858 | -392,52075 | 8,77566 | 0,98757 | **  | 1 | □ | ['18L']  | □                           | hypothetical protein                     | NA         | NA                                                                                |
| Supercontig_1.50_MV<br>LG_04465_6sp  | -442,35616 | -438,86908 | 6,97416 | 0,96941 | **  | 1 | □ | ['19P']  | □                           | hypothetical protein                     | NA         | NA                                                                                |
| Supercontig_1.86_MV<br>LG_05820_9sp  | -348,54919 | -344,14812 | 8,80214 | 0,98774 | **  | 1 | □ | ['1N']   | □                           | hypothetical protein                     | PF02668.9  | TauD(Taurine catabolism dioxygenase TauD, TfdA family)                            |
| Supercontig_1.58_MV<br>LG_04841_9sp  | -843,38917 | -839,4297  | 7,91894 | 0,98093 | **  | 1 | □ | ['24D']  | □                           | hypothetical protein                     | NA         | NA                                                                                |

|                                      |            |            |         |         |    |   |   |         |          |                      |            |                                                                                |
|--------------------------------------|------------|------------|---------|---------|----|---|---|---------|----------|----------------------|------------|--------------------------------------------------------------------------------|
| Supercontig_1.5_MVL<br>G_01006_10sp  | -551,89991 | -547,3082  | 9,18342 | 0,98986 | ** | 1 | □ | ["24P"] | □        | hypothetical protein | NA         | NA                                                                             |
| Supercontig_1.77_MV<br>LG_05553_9sp  | -664,14162 | -661,01587 | 6,2515  | 0,9561  | ** | 1 | □ | ["27T"] | □        | hypothetical protein | PF00168.23 | C2(C2 domain)                                                                  |
| Supercontig_1.105_MV<br>LG_06213_6sp | -1104,6929 | -1100,5704 | 8,24488 | 0,9838  | ** | 1 | □ | ["36E"] | □        | hypothetical protein | NA         | NA                                                                             |
| Supercontig_1.48_MV<br>LG_04374_8sp  | -604,3647  | -599,76233 | 9,20474 | 0,98997 | ** | 1 | □ | ["40D"] | □        | hypothetical protein | NA         | NA                                                                             |
| Supercontig_1.47_MV<br>LG_04300_9sp  | -400,89887 | -397,65549 | 6,48676 | 0,96097 | ** | 1 | □ | ["40F"] | □        | hypothetical protein | NA         | NA                                                                             |
| Supercontig_1.40_MV<br>LG_03923_10sp | -624,2154  | -620,52247 | 7,38586 | 0,9751  | ** | 1 | □ | ["42H"] | □        | hypothetical protein | PF02221.8  | E1_DerP2_DerF2(ML domain)                                                      |
| Supercontig_1.18_MV<br>LG_02406_8sp  | -1020,079  | -1016,0185 | 8,1209  | 0,98276 | ** | 1 | □ | ["44R"] | □        | hypothetical protein | NA         | NA                                                                             |
| Supercontig_1.8_MVL<br>G_01383_9sp   | -339,66122 | -336,02425 | 7,27394 | 0,97367 | ** | 1 | □ | ["4T"]  | □        | histone H2B          | PF00125.17 | Histone(Core histone<br>H2A/H2B/H3/H4)                                         |
| Supercontig_1.27_MV<br>LG_03106_10sp | -904,64041 | -900,42623 | 8,42836 | 0,98522 | ** | 1 | □ | ["66S"] | □        | hypothetical protein | TIGR00727  | TIGR00727(ISP4_OPT: small<br>oligopeptide transporter, OPT<br>family)          |
| Supercontig_1.2_MVL<br>G_00278_9sp   | -453,34499 | -448,9984  | 8,69318 | 0,98705 | ** | 1 | □ | ["8S"]  | □        | hypothetical protein | PF10343.2  | DUF2419(Protein of unknown<br>function (DUF2419))                              |
| Supercontig_1.8_MVL<br>G_01406_8sp   | -894,07348 | -890,39061 | 7,36574 | 0,97485 | ** | 1 | □ | □       | ["100I"] | hypothetical protein | NA         | NA                                                                             |
| Supercontig_1.30_MV<br>LG_03259_8sp  | -838,25319 | -834,8769  | 6,75258 | 0,96583 | ** | 1 | □ | □       | ["102N"] | hypothetical protein | PF01432.13 | Peptidase_M3(Peptidase family<br>M3)                                           |
| Supercontig_1.39_MV<br>LG_03848_9sp  | -608,2822  | -604,42242 | 7,71956 | 0,97893 | ** | 1 | □ | □       | ["10G"]  | hypothetical protein | PF03364.13 | Polyketide_cyc(Polyketide<br>cyclase / dehydrase and lipid<br>transport)       |
| Supercontig_1.86_MV<br>LG_05838_8sp  | -589,31346 | -585,96355 | 6,69982 | 0,96491 | ** | 1 | □ | □       | ["12F"]  | hypothetical protein | PF00781.17 | DAGK_cat(Diacylglycerol kinase<br>catalytic domain)                            |
| Supercontig_1.9_MVL<br>G_01485_8sp   | -928,55028 | -925,26831 | 6,56394 | 0,96245 | ** | 1 | □ | □       | ["131G"] | hypothetical protein | PF00248.14 | Aldo_ket_red(Aldo/keto<br>reductase family)                                    |
| Supercontig_1.16_MV<br>LG_02222_6sp  | -968,25692 | -964,56317 | 7,3875  | 0,97512 | ** | 1 | □ | □       | ["141L"] | hypothetical protein | NA         | NA                                                                             |
| Supercontig_1.30_MV<br>LG_03288_10sp | -1174,529  | -1170,9655 | 7,12692 | 0,97166 | ** | 1 | □ | □       | ["143R"] | hypothetical protein | PF01545.14 | Cation_efflux(Cation efflux<br>family)                                         |
| Supercontig_1.17_MV<br>LG_02263_11sp | -418,84996 | -414,45972 | 8,78048 | 0,9876  | ** | 1 | □ | □       | ["17A"]  | hypothetical protein | PF04136.8  | Sec34(Sec34-like family)                                                       |
| Supercontig_1.198_MV<br>LG_07075_6sp | -882,04345 | -878,72778 | 6,63134 | 0,96369 | ** | 1 | □ | □       | ["1D"]   | hypothetical protein | PF04739.8  | AMPKBI(5'-AMP-activated<br>protein kinase beta subunit,<br>interaction domain) |
| Supercontig_1.101_MV<br>LG_06149_6sp | -1020,198  | -1017,0869 | 6,22214 | 0,95545 | ** | 1 | □ | □       | ["1S"]   | hypothetical protein | PF02984.12 | Cyclin_C(Cyclin, C-terminal<br>domain)                                         |
| Supercontig_1.64_MV<br>LG_05110_9sp  | -646,68344 | -643,67342 | 6,02004 | 0,95071 | ** | 1 | □ | □       | ["20G"]  | hypothetical protein | NA         | NA                                                                             |
| Supercontig_1.15_MV<br>LG_02097_6sp  | -395,25471 | -392,21225 | 6,08492 | 0,95228 | ** | 1 | □ | □       | ["22S"]  | hypothetical protein | PF08122.5  | NDUF_B12(NADH-ubiquinone<br>oxidoreductase B12 subunit<br>family)              |
| Supercontig_1.269_MV<br>LG_07222_8sp | -515,03147 | -511,82548 | 6,41198 | 0,95948 | ** | 1 | □ | □       | ["23K"]  | hypothetical protein | NA         | NA                                                                             |
| Supercontig_1.16_MV<br>LG_02217_8sp  | -862,86774 | -859,20814 | 7,3192  | 0,97426 | ** | 1 | □ | □       | ["24E"]  | hypothetical protein | PF02574.9  | S-methyl_trans(Homocysteine S-<br>methyltransferase)                           |

|                                       |            |            |         |         |    |   |   |   |        |                                                     |            |                                                                       |
|---------------------------------------|------------|------------|---------|---------|----|---|---|---|--------|-----------------------------------------------------|------------|-----------------------------------------------------------------------|
| Supercontig_1.22_MV<br>LG_02728_9sp   | -371,42003 | -368,24809 | 6,34388 | 0,95808 | ** | 1 | □ | □ | [26Y]  | hypothetical protein                                | TIGR00727  | TIGR00727(ISP4_OPT: small oligopeptide transporter, OPT family)       |
| Supercontig_1.120_MV<br>LG_06421_10sp | -1798,935  | -1794,901  | 8,06798 | 0,9823  | ** | 1 | □ | □ | [277C] | hypothetical protein                                | NA         | NA                                                                    |
| Supercontig_1.13_MV<br>LG_01897_8sp   | -513,68486 | -510,01505 | 7,33962 | 0,97452 | ** | 1 | □ | □ | [27K]  | hypothetical protein                                | PF00704.21 | Glyco_hydro_18(Glycosyl hydrolases family 18)                         |
| Supercontig_1.29_MV<br>LG_03218_7sp   | -557,75738 | -554,35291 | 6,80894 | 0,96678 | ** | 1 | □ | □ | [28L]  | hypothetical protein                                | PF00254.21 | FKBP_C(FKBP-type peptidyl-prolyl cis-trans isomerase)                 |
| Supercontig_1.126_MV<br>LG_06526_8sp  | -768,20124 | -764,61048 | 7,18152 | 0,97242 | ** | 1 | □ | □ | [29S]  | hypothetical protein                                | NA         | NA                                                                    |
| Supercontig_1.5_MVL<br>G_00974_10sp   | -602,41036 | -598,00028 | 8,82016 | 0,98785 | ** | 1 | □ | □ | [31T]  | hypothetical protein                                | NA         | NA                                                                    |
| Supercontig_1.11_MV<br>LG_01750_7sp   | -374,42151 | -370,54464 | 7,75374 | 0,97928 | ** | 1 | □ | □ | [32H]  | tRNA methyl transferase                             | PF03054.9  | tRNA_Me_trans(tRNA methyl transferase)                                |
| Supercontig_1.20_MV<br>LG_02519_10sp  | -509,00357 | -505,48291 | 7,04132 | 0,97042 | ** | 1 | □ | □ | [32L]  | hypothetical protein                                | PF01738.11 | DLH(Dienelactone hydrolase family)                                    |
| Supercontig_1.60_MV<br>LG_04941_7sp   | -1060,5769 | -1056,0294 | 9,09498 | 0,98941 | ** | 1 | □ | □ | [33N]  | hypothetical protein                                | PF08447.4  | PAS_3(PAS fold)                                                       |
| Supercontig_1.25_MV<br>LG_02959_11sp  | -483,32118 | -479,60783 | 7,4267  | 0,9756  | ** | 1 | □ | □ | [33R]  | hypothetical protein                                | NA         | NA                                                                    |
| Supercontig_1.85_MV<br>LG_05800_7sp   | -940,92608 | -936,37635 | 9,09946 | 0,98943 | ** | 1 | □ | □ | [35E]  | 6-phosphogluconate dehydrogenase, decarboxylating 1 | PF03446.8  | NAD_binding_2(NAD binding domain of 6-phosphogluconate dehydrogenase) |
| Supercontig_1.20_MV<br>LG_02593_12sp  | -595,69636 | -591,38916 | 8,6144  | 0,98653 | ** | 1 | □ | □ | [38Q]  | hypothetical protein                                | NA         | NA                                                                    |
| Supercontig_1.12_MV<br>LG_01822_12sp  | -617,05933 | -613,18262 | 7,75342 | 0,97928 | ** | 1 | □ | □ | [39L]  | hypothetical protein                                | TIGR02250  | TIGR02250(FCP1_euk: FCP1-like phosphatase, phosphatase domain)        |
| Supercontig_1.16_MV<br>LG_02248_12sp  | -806,78119 | -803,72016 | 6,12206 | 0,95316 | ** | 1 | □ | □ | [41G]  | hypothetical protein                                | NA         | NA                                                                    |
| Supercontig_1.2_MVL<br>G_00454_8sp    | -349,78943 | -345,76677 | 8,04532 | 0,98209 | ** | 1 | □ | □ | [43A]  | hypothetical protein                                | NA         | NA                                                                    |
| Supercontig_1.12_MV<br>LG_01827_10sp  | -527,51724 | -523,24654 | 8,5414  | 0,98603 | ** | 1 | □ | □ | [48E]  | hypothetical protein                                | NA         | NA                                                                    |
| Supercontig_1.98_MV<br>LG_06101_8sp   | -402,64942 | -399,26263 | 6,77358 | 0,96618 | ** | 1 | □ | □ | [48G]  | V-type ATPase, G subunit                            | PF03179.8  | V-ATPase_G(Vacuolar (H <sup>+</sup> )-ATPase G subunit)               |
| Supercontig_1.40_MV<br>LG_03935_11sp  | -682,91446 | -679,24288 | 7,34316 | 0,97456 | ** | 1 | □ | □ | [48Q]  | hypothetical protein                                | PF06728.6  | PIG-U(GPI transamidase subunit PIG-U)                                 |
| Supercontig_1.155_MV<br>LG_06819_6sp  | -640,41898 | -637,17013 | 6,4977  | 0,96118 | ** | 1 | □ | □ | [4M']  | hypothetical protein                                | NA         | NA                                                                    |
| Supercontig_1.22_MV<br>LG_02732_7sp   | -492,96929 | -489,726   | 6,48658 | 0,96096 | ** | 1 | □ | □ | [50I]  | hypothetical protein                                | NA         | NA                                                                    |
| Supercontig_1.39_MV<br>LG_03852_8sp   | -460,93182 | -457,37543 | 7,11278 | 0,97146 | ** | 1 | □ | □ | [52G]  | hypothetical protein                                | PF01138.14 | RNase_PH(3' exoribonuclease family, domain 1)                         |
| Supercontig_1.20_MV<br>LG_02527_12sp  | -506,83232 | -502,23273 | 9,19918 | 0,98994 | ** | 1 | □ | □ | [56R]  | hypothetical protein                                | NA         | NA                                                                    |
| Supercontig_1.50_MV<br>LG_04472_6sp   | -584,733   | -581,12215 | 7,2217  | 0,97297 | ** | 1 | □ | □ | [56V]  | hypothetical protein                                | PF09793.2  | AD(Anticodon-binding domain)                                          |



|                                       |            |            |         |         |    |   |   |   |   |   |                |                      |                      |                                                              |                                            |
|---------------------------------------|------------|------------|---------|---------|----|---|---|---|---|---|----------------|----------------------|----------------------|--------------------------------------------------------------|--------------------------------------------|
| Supercontig_1.22_MV<br>LG_02744_10sp  | -756,77689 | -753,73226 | 6,08926 | 0,95239 | ** | 1 | □ | □ | □ | □ | ['56V']        | hypothetical protein | PF03151.9            | TPT(Triose-phosphate<br>Transporter family)                  |                                            |
| Supercontig_1.10_MV<br>LG_01623_11sp  | -644,51621 | -640,70544 | 7,62154 | 0,97787 | ** | 1 | □ | □ | □ | □ | ['58T']        | hypothetical protein | PF03725.8            | RNase_PH_C(3'<br>exoribonuclease family, domain<br>2)        |                                            |
| Supercontig_1.6_MVL<br>G_01140_7sp    | -397,8582  | -393,70622 | 8,30396 | 0,98427 | ** | 1 | □ | □ | □ | □ | ['60S']        | hypothetical protein | NA                   | NA                                                           |                                            |
| Supercontig_1.109_MV<br>LG_06274_7sp  | -621,74526 | -618,50444 | 6,48164 | 0,96087 | ** | 1 | □ | □ | □ | □ | ['61V']        | hypothetical protein | PF03398.7            | Ist1(Regulator of Vps4 activity in<br>the MVB pathway)       |                                            |
| Supercontig_1.180_MV<br>LG_07001_10sp | -623,16552 | -619,78512 | 6,76608 | 0,96597 | ** | 1 | □ | □ | □ | □ | ['65S']        | hypothetical protein | NA                   | NA                                                           |                                            |
| Supercontig_1.91_MV<br>LG_05928_9sp   | -673,12156 | -669,58464 | 7,07384 | 0,9709  | ** | 1 | □ | □ | □ | □ | ['67Q']        | hypothetical protein | TIGR00431            | TIGR00431(TruB: tRNA<br>pseudouridine synthase B)            |                                            |
| Supercontig_1.7_MVL<br>G_01316_8sp    | -449,47674 | -445,99661 | 6,96026 | 0,9692  | ** | 1 | □ | □ | □ | □ | ['6L']         | hypothetical protein | NA                   | NA                                                           |                                            |
| Supercontig_1.21_MV<br>LG_02654_10sp  | -1059,2546 | -1055,8482 | 6,81282 | 0,96684 | ** | 1 | □ | □ | □ | □ | ['70T']        | hypothetical protein | NA                   | NA                                                           |                                            |
| Supercontig_1.126_MV<br>LG_06531_9sp  | -842,1933  | -838,32212 | 7,74236 | 0,97917 | ** | 1 | □ | □ | □ | □ | ['74S']        | hypothetical protein | NA                   | NA                                                           |                                            |
| Supercontig_1.25_MV<br>LG_02916_8sp   | -1045,1983 | -1041,5015 | 7,39362 | 0,9752  | ** | 1 | □ | □ | □ | □ | ['84R']        | hypothetical protein | PF07535.5            | zf-DBF(DBF zinc finger)                                      |                                            |
| Supercontig_1.12_MV<br>LG_01845_12sp  | -737,27519 | -733,85741 | 6,83556 | 0,96721 | ** | 1 | □ | □ | □ | □ | ['89E']        | hypothetical protein | PF00704.21           | Glyco_hydro_18(Glycosyl<br>hydrolases family 18)             |                                            |
| Supercontig_1.1_MVL<br>G_00072_8sp    | -574,26586 | -571,17573 | 6,18026 | 0,9545  | ** | 1 | □ | □ | □ | □ | ['8S']         | hypothetical protein | PF00083.17           | Sugar_tr(Sugar (and other)<br>transporter)                   |                                            |
| Supercontig_1.4_MVL<br>G_00822_10sp   | -977,16197 | -973,72973 | 6,86448 | 0,96769 | ** | 1 | □ | □ | □ | □ | ['92A']        | hypothetical protein | PF00564.17           | PB1(PB1 domain)                                              |                                            |
| Supercontig_1.6_MVL<br>G_01202_8sp    | -554,12995 | -551,30986 | 5,64018 | 0,9404  | *  | 2 | □ | □ | □ | □ | ['45E', '93Q'] | hypothetical protein | PF04851.8            | ResIII(Type III restriction<br>enzyme, res subunit)          |                                            |
| Supercontig_1.38_MV<br>LG_03812_11sp  | -488,69338 | -486,04607 | 5,29462 | 0,92916 | *  | 1 | □ | □ | □ | □ | ['11K']        | □                    | hypothetical protein | PF12146.1                                                    | Hydrolase_4(Putative<br>lysophospholipase) |
| Supercontig_1.17_MV<br>LG_02260_11sp  | -1308,3931 | -1305,4843 | 5,81758 | 0,94546 | *  | 1 | □ | □ | □ | □ | ['126K']       | □                    | hypothetical protein | NA                                                           | NA                                         |
| Supercontig_1.41_MV<br>LG_04004_7sp   | -642,79258 | -639,96595 | 5,65326 | 0,94079 | *  | 1 | □ | □ | □ | □ | ['107K']       | hypothetical protein | PF08386.3            | Abhydrolase_4(TAP-like protein)                              |                                            |
| Supercontig_1.10_MV<br>LG_01581_7sp   | -1503,9206 | -1501,1583 | 5,52448 | 0,93685 | *  | 1 | □ | □ | □ | □ | ['113Q']       | hypothetical protein | PF04389.10           | Peptidase_M28(Peptidase family<br>M28)                       |                                            |
| Supercontig_1.24_MV<br>LG_02832_7sp   | -1032,9314 | -1030,3117 | 5,2394  | 0,92718 | *  | 1 | □ | □ | □ | □ | ['11N']        | hypothetical protein | PF02096.13           | 60KD_IMP(60Kd inner<br>membrane protein)                     |                                            |
| Supercontig_1.3_MVL<br>G_00675_6sp    | -934,3397  | -931,88896 | 4,90148 | 0,91377 | *  | 1 | □ | □ | □ | □ | ['128R']       | hypothetical protein | NA                   | NA                                                           |                                            |
| Supercontig_1.10_MV<br>LG_01663_10sp  | -498,0988  | -495,23376 | 5,73008 | 0,94302 | *  | 1 | □ | □ | □ | □ | ['13R']        | hypothetical protein | NA                   | NA                                                           |                                            |
| Supercontig_1.66_MV<br>LG_05158_12sp  | -1204,1892 | -1201,6024 | 5,1737  | 0,92474 | *  | 1 | □ | □ | □ | □ | ['148S']       | hypothetical protein | PF00566.11           | TBC(TBC domain)                                              |                                            |
| Supercontig_1.10_MV<br>LG_01606_11sp  | -637,07615 | -634,24897 | 5,65436 | 0,94082 | *  | 1 | □ | □ | □ | □ | ['14K']        | hypothetical protein | PF10585.2            | UBA_e1_thiolCys(Ubiquitin-<br>activating enzyme active site) |                                            |
| Supercontig_1.3_MVL<br>G_00543_9sp    | -457,72519 | -454,8961  | 5,65818 | 0,94093 | *  | 1 | □ | □ | □ | □ | ['15S']        | hypothetical protein | PF05620.4            | DUF788(Protein of unknown<br>function (DUF788))              |                                            |
| Supercontig_1.10_MV<br>LG_01578_9sp   | -716,5291  | -713,69436 | 5,66948 | 0,94127 | *  | 1 | □ | □ | □ | □ | ['16E']        | hypothetical protein | NA                   | NA                                                           |                                            |

|                                      |            |            |         |         |   |   |   |   |        |                               |            |                                                                                        |
|--------------------------------------|------------|------------|---------|---------|---|---|---|---|--------|-------------------------------|------------|----------------------------------------------------------------------------------------|
| Supercontig_1.46_MV<br>LG_04239_10sp | -461,51129 | -459,05837 | 4,90584 | 0,91396 | * | 1 | 0 | 0 | [16K]  | hypothetical protein          | PF00083.17 | Sugar_tr(Sugar (and other)<br>transporter)                                             |
| Supercontig_1.40_MV<br>LG_03939_7sp  | -498,72624 | -496,30727 | 4,83794 | 0,91099 | * | 1 | 0 | 0 | [16V]  | 60S ribosomal protein<br>L9-A | PF00347.16 | Ribosomal_L6(Ribosomal protein<br>L6)                                                  |
| Supercontig_1.46_MV<br>LG_04258_10sp | -1351,8859 | -1348,9142 | 5,9434  | 0,94878 | * | 1 | 0 | 0 | [173F] | hypothetical protein          | PF10384.2  | Scm3(Centromere protein Scm3)                                                          |
| Supercontig_1.55_MV<br>LG_04749_12sp | -519,86747 | -517,07219 | 5,59056 | 0,9389  | * | 1 | 0 | 0 | [18T]  | hypothetical protein          | NA         | NA                                                                                     |
| Supercontig_1.1_MVL<br>G_00068_9sp   | -814,51434 | -811,80931 | 5,41006 | 0,93313 | * | 1 | 0 | 0 | [1D]   | hypothetical protein          | PF09732.2  | CactinC_cactus(Cactus-binding<br>C-terminus of cactin protein)                         |
| Supercontig_1.77_MV<br>LG_05541_10sp | -638,79311 | -636,38469 | 4,81684 | 0,91004 | * | 1 | 0 | 0 | [1T]   | hypothetical protein          | TIGR00880  | TIGR00880(2_A_01_02:<br>Multidrug resistance protein)                                  |
| Supercontig_1.10_MV<br>LG_01611_6sp  | -296,81542 | -294,43721 | 4,75642 | 0,90728 | * | 1 | 0 | 0 | [23G]  | hypothetical protein          | PF00240.16 | ubiquitin(Ubiquitin family)                                                            |
| Supercontig_1.31_MV<br>LG_03337_8sp  | -427,25261 | -424,57017 | 5,36488 | 0,9316  | * | 1 | 0 | 0 | [28E]  | hypothetical protein          | NA         | NA                                                                                     |
| Supercontig_1.17_MV<br>LG_02329_9sp  | -530,37463 | -527,68999 | 5,36928 | 0,93175 | * | 1 | 0 | 0 | [28M]  | hypothetical protein          | TIGR00879  | TIGR00879(SP: MFS<br>transporter, sugar porter (SP)<br>family)                         |
| Supercontig_1.4_MVL<br>G_00770_10sp  | -542,67771 | -540,19991 | 4,9556  | 0,91607 | * | 1 | 0 | 0 | [29R]  | hypothetical protein          | PF00755.13 | Carn_acyltransf(Choline/Carnitin<br>e o-acyltransferase)                               |
| Supercontig_1.59_MV<br>LG_04888_7sp  | -1456,3884 | -1453,9399 | 4,897   | 0,91358 | * | 1 | 0 | 0 | [2S]   | hypothetical protein          | PF09757.2  | Arb2(Arb2 domain)                                                                      |
| Supercontig_1.12_MV<br>LG_01798_8sp  | -429,24708 | -426,92744 | 4,63928 | 0,90169 | * | 1 | 0 | 0 | [36L]  | hypothetical protein          | PF04180.7  | LTV(Low temperature viability<br>protein)                                              |
| Supercontig_1.2_MVL<br>G_00404_9sp   | -678,43795 | -675,81399 | 5,24792 | 0,92748 | * | 1 | 0 | 0 | [36L]  | hypothetical protein          | PF02771.9  | Acyl-CoA_dh_N(Acyl-CoA<br>dehydrogenase, N-terminal<br>domain)                         |
| Supercontig_1.112_MV<br>LG_06329_9sp | -443,50249 | -440,80642 | 5,39214 | 0,93253 | * | 1 | 0 | 0 | [36R]  | hypothetical protein          | PF00657.15 | Lipase_GDSL(GDSL-like<br>Lipase/Acylhydrolase)                                         |
| Supercontig_1.10_MV<br>LG_01632_8sp  | -373,44225 | -370,69941 | 5,48568 | 0,93561 | * | 1 | 0 | 0 | [3D]   | hypothetical protein          | NA         | NA                                                                                     |
| Supercontig_1.15_MV<br>LG_02078_9sp  | -757,38738 | -754,6065  | 5,56176 | 0,93802 | * | 1 | 0 | 0 | [3D]   | Transcription<br>coactivator  | PF00249.24 | Myb_DNA-binding(Myb-like DNA-<br>binding domain)                                       |
| Supercontig_1.6_MVL<br>G_01133_9sp   | -748,50393 | -745,71306 | 5,58174 | 0,93863 | * | 1 | 0 | 0 | [3N]   | hypothetical protein          | PF00743.12 | FMO-like(Flavin-binding<br>monooxygenase-like)                                         |
| Supercontig_1.16_MV<br>LG_02243_12sp | -774,58036 | -771,97806 | 5,2046  | 0,9259  | * | 1 | 0 | 0 | [40R]  | histone H2A.1                 | PF00808.16 | CBFD_NFYB_HMF(Histone-like<br>transcription factor (CBF/NF-Y)<br>and archaeal histone) |
| Supercontig_1.22_MV<br>LG_02741_9sp  | -759,72467 | -757,32749 | 4,79436 | 0,90903 | * | 1 | 0 | 0 | [41K]  | hypothetical protein          | PF02338.12 | OTU(OTU-like cysteine<br>protease)                                                     |
| Supercontig_1.8_MVL<br>G_01445_9sp   | -994,84238 | -991,9072  | 5,87036 | 0,94688 | * | 1 | 0 | 0 | [44P]  | hypothetical protein          | NA         | NA                                                                                     |
| Supercontig_1.170_MV<br>LG_06940_7sp | -456,28986 | -453,8093  | 4,96112 | 0,9163  | * | 1 | 0 | 0 | [45S]  | hypothetical protein          | NA         | NA                                                                                     |
| Supercontig_1.67_MV<br>LG_05202_7sp  | -595,11653 | -592,43182 | 5,36942 | 0,93176 | * | 1 | 0 | 0 | [47E]  | hypothetical protein          | PF08433.3  | KTI12(Chromatin associated<br>protein KTI12)                                           |
| Supercontig_1.36_MV<br>LG_03633_7sp  | -399,37083 | -396,93601 | 4,86964 | 0,91239 | * | 1 | 0 | 0 | [48L]  | hypothetical protein          | NA         | NA                                                                                     |

|                                       |            |            |         |         |    |   |   |         |                |                                                    |            |                                                                      |
|---------------------------------------|------------|------------|---------|---------|----|---|---|---------|----------------|----------------------------------------------------|------------|----------------------------------------------------------------------|
| Supercontig_1.14_MV<br>LG_02015_9sp   | -755,68258 | -753,12606 | 5,11304 | 0,92243 | *  | 1 | □ | □       | ['56N']        | hypothetical protein                               | NA         | NA                                                                   |
| Supercontig_1.63_MV<br>LG_05062_10sp  | -751,67012 | -749,30587 | 4,7285  | 0,90598 | *  | 1 | □ | □       | ['60I']        | hypothetical protein                               | PF08219.4  | TOM13(Outer membrane protein TOM13)                                  |
| Supercontig_1.3_MVL<br>G_00631_7sp    | -546,94486 | -544,43818 | 5,01336 | 0,91846 | *  | 1 | □ | □       | ['63R']        | hypothetical protein                               | PF08592.4  | DUF1772(Domain of unknown function (DUF1772))                        |
| Supercontig_1.30_MV<br>LG_03302_10sp  | -439,58847 | -436,71823 | 5,74048 | 0,94331 | *  | 1 | □ | □       | ['64A']        | hypothetical protein                               | PF00018.21 | SH3_1(SH3 domain)                                                    |
| Supercontig_1.5_MVL<br>G_00886_11sp   | -524,24498 | -521,528   | 5,43396 | 0,93393 | *  | 1 | □ | □       | ['6V']         | hypothetical protein                               | NA         | NA                                                                   |
| Supercontig_1.31_MV<br>LG_03336_12sp  | -1220,8148 | -1218,3916 | 4,8464  | 0,91136 | *  | 1 | □ | □       | ['78F']        | hypothetical protein                               | PF00069.18 | Pkinase(Protein kinase domain)                                       |
| Supercontig_1.6_MVL<br>G_01084_8sp    | -583,38793 | -581,06447 | 4,64692 | 0,90207 | *  | 1 | □ | □       | ['7Q']         | cell division control protein 3                    | PF03193.9  | DUF258(Protein of unknown function, DUF258)                          |
| Supercontig_1.1_MVL<br>G_00052_8sp    | -361,32604 | -359,07049 | 4,5111  | 0,89518 | NS | 1 | □ | ['39H'] | □              | hypothetical protein                               | NA         | NA                                                                   |
| Supercontig_1.44_MV<br>LG_04155_10sp  | -1302,7502 | -1300,4838 | 4,53282 | 0,89632 | NS | 1 | □ | □       | ['104K']       | hypothetical protein                               | PF01163.15 | RIO1(RIO1 family)                                                    |
| Supercontig_1.76_MV<br>LG_05535_11sp  | -692,88287 | -691,3464  | 3,07294 | 0,78486 | NS | 1 | □ | □       | ['10K']        | hypothetical protein                               | PF08477.6  | Miro(Miro-like protein)                                              |
| Supercontig_1.15_MV<br>LG_02154_9sp   | -522,09692 | -519,79468 | 4,60448 | 0,89997 | NS | 1 | □ | □       | ['13N']        | hypothetical protein                               | PF01243.13 | Pyridox_oxidase(Pyridoxamine 5-phosphate oxidase)                    |
| Supercontig_1.19_MV<br>LG_02461_7sp   | -664,97375 | -662,83723 | 4,27304 | 0,88194 | NS | 1 | □ | □       | ['13S']        | hypothetical protein                               | PF01040.11 | UbiA(UbiA prenyltransferase family)                                  |
| Supercontig_1.105_MV<br>LG_06219_7sp  | -470,73498 | -468,51391 | 4,44214 | 0,89151 | NS | 1 | □ | □       | ['15S']        | hypothetical protein                               | PF01008.10 | IF-2B(Initiation factor 2 subunit family)                            |
| Supercontig_1.42_MV<br>LG_04049_10sp  | -1128,3598 | -1126,7354 | 3,24878 | 0,80297 | NS | 1 | □ | □       | ['164K']       | hypothetical protein                               | PF00063.14 | Myosin_head(Myosin head (motor domain))                              |
| Supercontig_1.40_MV<br>LG_03947_9sp   | -465,80204 | -463,58998 | 4,42412 | 0,89053 | NS | 1 | □ | □       | ['16N']        | hypothetical protein                               | NA         | NA                                                                   |
| Supercontig_1.26_MV<br>LG_03019_8sp   | -651,6836  | -649,4428  | 4,4816  | 0,89363 | NS | 2 | □ | □       | ['21E', '72E'] | hypothetical protein                               | NA         | NA                                                                   |
| Supercontig_1.29_MV<br>LG_03242_6sp   | -1040,7807 | -1038,9196 | 3,72228 | 0,8445  | NS | 1 | □ | □       | ['23H']        | hypothetical protein                               | PF01565.16 | FAD_binding_4(FAD binding domain)                                    |
| Supercontig_1.88_MV<br>LG_05886_9sp   | -491,97617 | -490,73341 | 2,48552 | 0,71141 | NS | 1 | □ | □       | ['25H']        | hypothetical protein                               | TIGR00049  | TIGR00049(TIGR00049: iron-sulfur cluster assembly accessory protein) |
| Supercontig_1.191_MV<br>LG_07043_10sp | -485,41481 | -483,15509 | 4,51944 | 0,89562 | NS | 1 | □ | □       | ['30P']        | hypothetical protein                               | PF06991.4  | MFAP1_C(Micro-fibrillar-associated protein 1 C-terminus)             |
| Supercontig_1.11_MV<br>LG_01786_7sp   | -396,17814 | -393,90123 | 4,55382 | 0,8974  | NS | 1 | □ | □       | ['34M']        | hypothetical protein                               | NA         | NA                                                                   |
| Supercontig_1.80_MV<br>LG_05642_11sp  | -560,48214 | -558,65903 | 3,64622 | 0,83848 | NS | 1 | □ | □       | ['39A']        | guanine nucleotide-binding protein alpha-1 subunit | PF00025.14 | Arf(ADP-ribosylation factor family)                                  |
| Supercontig_1.1_MVL<br>G_00085_11sp   | -475,16047 | -472,9302  | 4,46054 | 0,8925  | NS | 1 | □ | □       | ['3Q']         | hypothetical protein                               | PF03330.11 | DPBB_1(Rare lipoprotein A (RlpA)-like double-psi beta-barrel)        |
| Supercontig_1.4_MVL<br>G_00841_10sp   | -394,10809 | -391,97245 | 4,27128 | 0,88183 | NS | 1 | □ | □       | ['40S']        | glucose 1-dehydrogenase                            | PF00106.18 | adh_short(short chain dehydrogenase)                                 |
| Supercontig_1.60_MV<br>LG_04953_6sp   | -807,2362  | -805,24499 | 3,98242 | 0,86347 | NS | 1 | □ | □       | ['46T']        | hypothetical protein                               | NA         | NA                                                                   |

|                                       |            |            |         |         |    |   |   |   |       |                                                  |            |                                                                                   |
|---------------------------------------|------------|------------|---------|---------|----|---|---|---|-------|--------------------------------------------------|------------|-----------------------------------------------------------------------------------|
| Supercontig_1.22_MV<br>LG_02745_9sp   | -570,98151 | -568,93557 | 4,09188 | 0,87074 | NS | 1 | □ | □ | [49N] | hypothetical protein                             | NA         | NA                                                                                |
| Supercontig_1.6_MVL<br>G_01119_11sp   | -520,81728 | -519,21721 | 3,20014 | 0,79812 | NS | 1 | □ | □ | [50S] | hypothetical protein                             | NA         | NA                                                                                |
| Supercontig_1.16_MV<br>LG_02241_7sp   | -502,85317 | -501,53003 | 2,64628 | 0,7337  | NS | 1 | □ | □ | [51A] | hypothetical protein                             | NA         | NA                                                                                |
| Supercontig_1.14_MV<br>LG_02049_7sp   | -1030,3519 | -1028,1869 | 4,33014 | 0,88526 | NS | 1 | □ | □ | [51S] | hypothetical protein                             | PF04670.5  | Gtr1_RagA(Gtr1/RagA G protein conserved region)                                   |
| Supercontig_1.21_MV<br>LG_02651_9sp   | -773,48915 | -771,57825 | 3,8218  | 0,85205 | NS | 1 | □ | □ | [56Q] | hypothetical protein                             | PF02535.15 | Zip(ZIP Zinc transporter)                                                         |
| Supercontig_1.33_MV<br>LG_03496_12sp  | -397,88949 | -396,04422 | 3,69054 | 0,84202 | NS | 1 | □ | □ | [6T]  | hypothetical protein                             | PF07540.4  | NOC3p(Nucleolar complex-associated protein)                                       |
| Supercontig_1.39_MV<br>LG_03900_10sp  | -586,3153  | -584,4506  | 3,7294  | 0,84506 | NS | 1 | □ | □ | [70I] | hypothetical protein                             | PF00447.10 | HSF_DNA-bind(HSF-type DNA-binding)                                                |
| Supercontig_1.16_MV<br>LG_02196_12sp  | -601,20465 | -599,03582 | 4,33766 | 0,88569 | NS | 1 | □ | □ | [76N] | hypothetical protein                             | NA         | NA                                                                                |
| Supercontig_1.1_MVL<br>G_00242_7sp    | -499,09938 | -497,20367 | 3,79142 | 0,84979 | NS | 1 | □ | □ | [77R] | hypothetical protein                             | PF00620.20 | RhoGAP(RhoGAP domain)                                                             |
| Supercontig_1.185_MV<br>LG_07019_10sp | -723,58867 | -721,44466 | 4,28802 | 0,88282 | NS | 1 | □ | □ | [86G] | hypothetical protein                             | PF10607.2  | RanBPM_CRA(Ran binding protein in the microtubule-organising centre)              |
| Supercontig_1.35_MV<br>LG_03581_8sp   | -693,90936 | -692,32446 | 3,1698  | 0,79503 | NS | 1 | □ | □ | [87V] | hypothetical protein                             | TIGR01313  | TIGR01313(therm_gnt_kin: carbohydrate kinase, thermoresistant glucokinase family) |
| Supercontig_1.99_MV<br>LG_06119_10sp  | -945,80216 | -943,64417 | 4,31598 | 0,88444 | NS | 1 | □ | □ | [8N]  | hypothetical protein                             | NA         | NA                                                                                |
| Supercontig_1.45_MV<br>LG_04222_10sp  | -622,13402 | -620,02422 | 4,2196  | 0,87874 | NS | 1 | □ | □ | [93T] | protein phosphatase<br>PP2A regulatory subunit A | PF02985.15 | HEAT(HEAT repeat)                                                                 |
| Supercontig_1.96_MV<br>LG_06049_9sp   | -723,64672 | -721,61214 | 4,06916 | 0,86926 | NS | 1 | □ | □ | [99K] | hypothetical protein                             | NA         | NA                                                                                |
| Supercontig_1.26_MV<br>LG_03052_6sp   | -404,70375 | -404,10267 | 1,20216 | 0,45178 | NS | 0 | □ | □ | □     | hypothetical protein                             | PF03016.8  | Exostosin(Exostosin family)                                                       |
| Supercontig_1.63_MV<br>LG_05081_7sp   | -643,67905 | -643,67905 | 0       | 0       | NS | 0 | □ | □ | □     | hypothetical protein                             | TIGR00625  | TIGR00625(tfb2: Transcription factor tfb2)                                        |
| Supercontig_1.19_MV<br>LG_02439_7sp   | -673,67538 | -673,67478 | 0,0012  | 0,0006  | NS | 0 | □ | □ | □     | heme-binding peroxidase                          | PF00141.16 | peroxidase(Peroxidase)                                                            |
| Supercontig_1.23_MV<br>LG_02765_9sp   | -853,77291 | -851,49197 | 4,56188 | 0,89781 | NS | 0 | □ | □ | □     | hypothetical protein                             | PF00611.16 | FCH(Fes/CIP4 homology domain)                                                     |
| Supercontig_1.11_MV<br>LG_01754_9sp   | -430,01612 | -430,01599 | 0,00026 | 0,00013 | NS | 0 | □ | □ | □     | Small GTPase                                     | PF08477.6  | Miro(Miro-like protein)                                                           |
| Supercontig_1.150_MV<br>LG_06780_9sp  | -317,91112 | -317,91096 | 0,00032 | 0,00016 | NS | 0 | □ | □ | □     | proteasome subunit alpha type-2                  | PF00227.19 | Proteasome(Proteasome subunit)                                                    |
| Supercontig_1.7_MVL<br>G_01341_11sp   | -534,63855 | -534,63855 | 0       | 0       | NS | 0 | □ | □ | □     | hypothetical protein                             | PF01697.20 | DUF23(Domain of unknown function)                                                 |
| Supercontig_1.142_MV<br>LG_06711_7sp  | -505,4449  | -505,4449  | 0       | 0       | NS | 0 | □ | □ | □     | triosephosphate isomerase                        | TIGR00419  | TIGR00419(tim: triose-phosphate isomerase)                                        |
| Supercontig_1.8_MVL<br>G_01409_7sp    | -507,52366 | -507,52357 | 0,00018 | 0       | NS | 0 | □ | □ | □     | hsp70-like protein                               | TIGR02350  | TIGR02350(prok_dnaK: chaperone protein DnaK)                                      |
| Supercontig_1.87_MV<br>LG_05859_9sp   | -749,54708 | -749,54708 | 0       | 0       | NS | 0 | □ | □ | □     | hypothetical protein                             | PF00400.25 | WD40(WD domain, G-beta repeat)                                                    |

|                                       |            |            |         |         |    |   |  |  |  |  |                                 |            |                                                                                 |
|---------------------------------------|------------|------------|---------|---------|----|---|--|--|--|--|---------------------------------|------------|---------------------------------------------------------------------------------|
| Supercontig_1.3_MVL<br>G_00589_11sp   | -446,75614 | -446,75614 | 0       | 0       | NS | 0 |  |  |  |  | hypothetical protein            | PF00328.15 | Acid_phosphat_A(Histidine acid phosphatase)                                     |
| Supercontig_1.180_MV<br>LG_06997_8sp  | -622,88709 | -622,26344 | 1,2473  | 0,46402 | NS | 0 |  |  |  |  | hypothetical protein            | PF04280.8  | Tim44(Tim44-like domain)                                                        |
| Supercontig_1.196_MV<br>LG_07064_6sp  | -431,96213 | -431,96171 | 0,00084 | 0,00042 | NS | 0 |  |  |  |  | dihydroxy-acid dehydratase      | PF00920.14 | ILVD_EDD(Dehydratase family)                                                    |
| Supercontig_1.96_MV<br>LG_06030_7sp   | -618,94205 | -618,94205 | 0       | 0       | NS | 0 |  |  |  |  | hypothetical protein            | PF00098.16 | zf-CCHC(Zinc knuckle)                                                           |
| Supercontig_1.63_MV<br>LG_05055_7sp   | -343,82866 | -343,82864 | 0       | 0       | NS | 0 |  |  |  |  | hypothetical protein            | NA         | NA                                                                              |
| Supercontig_1.40_MV<br>LG_03967_10sp  | -430,07216 | -427,91673 | 4,31086 | 0,88415 | NS | 0 |  |  |  |  | phosphoacetylglucosamine mutase | PF02880.9  | PGM_PMM_III(Phosphoglucomutase/phosphomannomutase, alpha/beta/alpha domain III) |
| Supercontig_1.113_MV<br>LG_06338_6sp  | -438,90485 | -438,23289 | 1,34392 | 0,48929 | NS | 0 |  |  |  |  | hypothetical protein            | NA         | NA                                                                              |
| Supercontig_1.23_MV<br>LG_02793_6sp   | -1583,8247 | -1583,396  | 0,85752 | 0,34868 | NS | 0 |  |  |  |  | hypothetical protein            | PF00271.24 | Helicase_C(Helicase conserved C-terminal domain)                                |
| Supercontig_1.88_MV<br>LG_05897_6sp   | -406,21263 | -406,21262 | 0       | 0       | NS | 0 |  |  |  |  | hypothetical protein            | NA         | NA                                                                              |
| Supercontig_1.40_MV<br>LG_03907_10sp  | -642,03528 | -642,03528 | 0       | 0       | NS | 0 |  |  |  |  | hypothetical protein            | PF08676.4  | MutL_C(MutL C terminal dimerisation domain)                                     |
| Supercontig_1.5_MVL<br>G_00988_6sp    | -330,79713 | -330,79713 | 0       | 0       | NS | 0 |  |  |  |  | 60S ribosomal protein L35       | PF00831.16 | Ribosomal_L29(Ribosomal L29 protein)                                            |
| Supercontig_1.12_MV<br>LG_01823_7sp   | -460,64731 | -460,64731 | 0       | 0       | NS | 0 |  |  |  |  | hypothetical protein            | PF01464.13 | SLT(Transglycosylase SLT domain)                                                |
| Supercontig_1.30_MV<br>LG_03323_9sp   | -548,73177 | -548,73177 | 0       | 0       | NS | 0 |  |  |  |  | hypothetical protein            | PF02466.12 | Tim17(Tim17/Tim22/Tim23 family)                                                 |
| Supercontig_1.149_MV<br>LG_06762_12sp | -421,06261 | -421,06261 | 0       | 0       | NS | 0 |  |  |  |  | hypothetical protein            | PF00999.14 | Na_H_Exchange(Sodium/hydrogen exchanger family)                                 |
| Supercontig_1.3_MVL<br>G_00536_6sp    | -487,07233 | -486,91406 | 0,31654 | 0,14638 | NS | 0 |  |  |  |  | hypothetical protein            | PF01852.12 | START(START domain)                                                             |
| Supercontig_1.24_MV<br>LG_02885_8sp   | -769,1366  | -769,1366  | 0       | 0       | NS | 0 |  |  |  |  | hypothetical protein            | PF01412.11 | ArfGap(Putative GTPase activating protein for Arf)                              |
| Supercontig_1.51_MV<br>LG_04530_10sp  | -409,57085 | -409,56041 | 0,02088 | 0,01039 | NS | 0 |  |  |  |  | hypothetical protein            | PF05916.4  | Sld5(GINS complex subunit Sld5)                                                 |
| Supercontig_1.98_MV<br>LG_06096_12sp  | -436,19432 | -436,19432 | 0       | 0       | NS | 0 |  |  |  |  | UDP-glucose 6-dehydrogenase     | TIGR03026  | TIGR03026(NDP-sugDHase: nucleotide sugar dehydrogenase)                         |
| Supercontig_1.66_MV<br>LG_05166_9sp   | -404,10765 | -404,10749 | 0,00032 | 0,00016 | NS | 0 |  |  |  |  | hypothetical protein            | PF00004.22 | AAA(ATPase family associated with various cellular activities (AAA))            |
| Supercontig_1.11_MV<br>LG_01780_9sp   | -1826,8365 | -1825,941  | 1,79114 | 0,59163 | NS | 0 |  |  |  |  | TKL protein kinase              | PF07714.10 | Pkinase_Tyr(Protein tyrosine kinase)                                            |
| Supercontig_1.9_MVL<br>G_01542_7sp    | -395,61839 | -395,50241 | 0,23196 | 0,10951 | NS | 0 |  |  |  |  | hypothetical protein            | NA         | NA                                                                              |
| Supercontig_1.83_MV<br>LG_05752_9sp   | -574,9529  | -574,03482 | 1,83616 | 0,60072 | NS | 0 |  |  |  |  | hypothetical protein            | PF00004.22 | AAA(ATPase family associated with various cellular activities (AAA))            |
| Supercontig_1.51_MV<br>LG_04546_10sp  | -496,30232 | -496,30003 | 0,00458 | 0,00229 | NS | 0 |  |  |  |  | hypothetical protein            | TIGR00727  | TIGR00727(ISP4_OPT: small oligopeptide transporter, OPT family)                 |

|                                      |            |            |         |         |    |   |  |  |  |                      |            |                                                                             |
|--------------------------------------|------------|------------|---------|---------|----|---|--|--|--|----------------------|------------|-----------------------------------------------------------------------------|
| Supercontig_1.26_MV<br>LG_03026_6sp  | -1143,6677 | -1143,6676 | 0,00016 | 0       | NS | 0 |  |  |  | hypothetical protein | PF08242.5  | Methyltransf_12(Methyltransferase domain)                                   |
| Supercontig_1.17_MV<br>LG_02264_7sp  | -885,57824 | -885,57824 | 0       | 0       | NS | 0 |  |  |  | hypothetical protein | PF00171.15 | Aldedh(Aldehyde dehydrogenase family)                                       |
| Supercontig_1.34_MV<br>LG_03534_10sp | -611,16468 | -611,16468 | 0       | 0       | NS | 0 |  |  |  | hypothetical protein | TIGR00040  | TIGR00040(yfcE: phosphodiesterase, MJ0936 family)                           |
| Supercontig_1.17_MV<br>LG_02270_9sp  | -387,18694 | -387,18684 | 0,0002  | 0       | NS | 0 |  |  |  | hypothetical protein | PF04193.7  | PQ-loop(PQ loop repeat)                                                     |
| Supercontig_1.2_MVL<br>G_00395_10sp  | -413,73469 | -413,73467 | 0       | 0       | NS | 0 |  |  |  | hypothetical protein | PF00400.25 | WD40(WD domain, G-beta repeat)                                              |
| Supercontig_1.60_MV<br>LG_04930_6sp  | -1076,2152 | -1076,2152 | 0       | 0       | NS | 0 |  |  |  | hypothetical protein | PF03765.8  | CRAL_TRIO_N(CRAL/TRIO, N-terminus)                                          |
| Supercontig_1.48_MV<br>LG_04367_6sp  | -1124,6262 | -1124,6262 | 0       | 0       | NS | 0 |  |  |  | hypothetical protein | PF05577.5  | Peptidase_S28(Serine carboxypeptidase S28)                                  |
| Supercontig_1.8_MVL<br>G_01420_7sp   | -457,75153 | -457,75143 | 0,0002  | 0       | NS | 0 |  |  |  | hypothetical protein | NA         | NA                                                                          |
| Supercontig_1.46_MV<br>LG_04242_8sp  | -501,00187 | -500,98899 | 0,02576 | 0,0128  | NS | 0 |  |  |  | hypothetical protein | PF05730.4  | CFEM(CFEM domain)                                                           |
| Supercontig_1.1_MVL<br>G_00227_10sp  | -577,37315 | -577,37315 | 0       | 0       | NS | 0 |  |  |  | hypothetical protein | PF00583.17 | Acetyltransf_1(Acetyltransferase (GNAT) family)                             |
| Supercontig_1.35_MV<br>LG_03597_9sp  | -422,42268 | -422,42247 | 0,00042 | 0,00021 | NS | 0 |  |  |  | hypothetical protein | PF03810.12 | IBN_N(Importin-beta N-terminal domain)                                      |
| Supercontig_1.3_MVL<br>G_00640_9sp   | -709,1273  | -707,24864 | 3,75732 | 0,84721 | NS | 0 |  |  |  | hypothetical protein | PF00226.24 | DnaJ(DnaJ domain)                                                           |
| Supercontig_1.10_MV<br>LG_01593_9sp  | -822,68349 | -822,68349 | 0       | 0       | NS | 0 |  |  |  | hypothetical protein | PF07728.7  | AAA_5(AAA domain (dynein-related subfamily))                                |
| Supercontig_1.17_MV<br>LG_02317_8sp  | -311,16855 | -311,12917 | 0,07876 | 0,03861 | NS | 0 |  |  |  | hypothetical protein | PF01408.15 | GFO_IDH_MocA(Oxidoreductase family, NAD-binding Rossmann fold)              |
| Supercontig_1.28_MV<br>LG_03130_12sp | -508,88583 | -508,88581 | 0       | 0       | NS | 0 |  |  |  | hypothetical protein | PF04616.7  | Glyco_hydro_43(Glycosyl hydrolases family 43)                               |
| Supercontig_1.156_MV<br>LG_06829_6sp | -886,24998 | -886,13579 | 0,22838 | 0,10791 | NS | 0 |  |  |  | hypothetical protein | PF00400.25 | WD40(WD domain, G-beta repeat)                                              |
| Supercontig_1.63_MV<br>LG_05061_7sp  | -553,35161 | -553,35154 | 0,00014 | 0       | NS | 0 |  |  |  | hypothetical protein | PF00226.24 | DnaJ(DnaJ domain)                                                           |
| Supercontig_1.94_MV<br>LG_05987_10sp | -516,90525 | -515,56115 | 2,6882  | 0,73923 | NS | 0 |  |  |  | hypothetical protein | NA         | NA                                                                          |
| Supercontig_1.15_MV<br>LG_02063_8sp  | -507,17426 | -507,17426 | 0       | 0       | NS | 0 |  |  |  | hypothetical protein | NA         | NA                                                                          |
| Supercontig_1.38_MV<br>LG_03782_10sp | -648,39708 | -647,94661 | 0,90094 | 0,36267 | NS | 0 |  |  |  | hypothetical protein | PF08118.4  | MDM31_MDM32(Yeast mitochondrial distribution and morphology (MDM) proteins) |
| Supercontig_1.15_MV<br>LG_02122_10sp | -406,15848 | -403,8681  | 4,58076 | 0,89877 | NS | 0 |  |  |  | hypothetical protein | PF09808.2  | SNAPc_SNAP43(Small nuclear RNA activating complex (SNAPc), subunit SNAP43)  |
| Supercontig_1.34_MV<br>LG_03515_7sp  | -534,90861 | -534,79683 | 0,22356 | 0,10576 | NS | 0 |  |  |  | hypothetical protein | PF05216.6  | UNC-50(UNC-50 family)                                                       |
| Supercontig_1.4_MVL<br>G_00867_9sp   | -697,08536 | -697,06114 | 0,04844 | 0,02393 | NS | 0 |  |  |  | hypothetical protein | NA         | NA                                                                          |

|                                       |            |            |         |         |    |   |   |   |   |   |   |   |   |   |   |   |   |   |   |                                      |            |                                                                   |
|---------------------------------------|------------|------------|---------|---------|----|---|---|---|---|---|---|---|---|---|---|---|---|---|---|--------------------------------------|------------|-------------------------------------------------------------------|
| Supercontig_1.5_MVL<br>G_00989_8sp    | -586,78762 | -586,78762 | 0       | 0       | NS | 0 | 0 | 0 | 0 | 0 | 0 | 0 | 0 | 0 | 0 | 0 | 0 | 0 | 0 | hypothetical protein                 | PF02229.9  | PC4(Transcriptional Coactivator p15 (PC4))                        |
| Supercontig_1.39_MV<br>LG_03883_10sp  | -721,51263 | -721,5126  | 0       | 0       | NS | 0 | 0 | 0 | 0 | 0 | 0 | 0 | 0 | 0 | 0 | 0 | 0 | 0 | 0 | hypothetical protein                 | PF04145.8  | Ctr(Ctr copper transporter family)                                |
| Supercontig_1.12_MV<br>LG_01828_7sp   | -903,67539 | -903,44772 | 0,45534 | 0,20361 | NS | 0 | 0 | 0 | 0 | 0 | 0 | 0 | 0 | 0 | 0 | 0 | 0 | 0 | 0 | hypothetical protein                 | PF09751.2  | Es2(Nuclear protein Es2)                                          |
| Supercontig_1.61_MV<br>LG_04985_10sp  | -378,02304 | -378,02276 | 0,00056 | 0,00028 | NS | 0 | 0 | 0 | 0 | 0 | 0 | 0 | 0 | 0 | 0 | 0 | 0 | 0 | 0 | hypothetical protein                 | PF02770.12 | Acyl-CoA_dh_M(Acyl-CoA dehydrogenase, middle domain)              |
| Supercontig_1.76_MV<br>LG_05523_10sp  | -706,89971 | -706,89939 | 0,00064 | 0,00032 | NS | 0 | 0 | 0 | 0 | 0 | 0 | 0 | 0 | 0 | 0 | 0 | 0 | 0 | 0 | hypothetical protein                 | PF09377.3  | SBDS_C(SBDS protein C-terminal domain)                            |
| Supercontig_1.18_MV<br>LG_02350_11sp  | -323,61732 | -323,6172  | 0,00024 | 0,00012 | NS | 0 | 0 | 0 | 0 | 0 | 0 | 0 | 0 | 0 | 0 | 0 | 0 | 0 | 0 | hypothetical protein                 | PF00233.12 | PDEase_(3'5'-cyclic nucleotide phosphodiesterase)                 |
| Supercontig_1.25_MV<br>LG_02977_9sp   | -434,72704 | -434,72703 | 0       | 0       | NS | 0 | 0 | 0 | 0 | 0 | 0 | 0 | 0 | 0 | 0 | 0 | 0 | 0 | 0 | 26S proteasome regulatory subunit N9 | PF01399.20 | PCI(PCI domain)                                                   |
| Supercontig_1.155_MV<br>LG_06817_9sp  | -800,58233 | -800,58229 | 0       | 0       | NS | 0 | 0 | 0 | 0 | 0 | 0 | 0 | 0 | 0 | 0 | 0 | 0 | 0 | 0 | hypothetical protein                 | PF00400.25 | WD40(WD domain, G-beta repeat)                                    |
| Supercontig_1.5_MVL<br>G_00977_8sp    | -518,1699  | -517,96132 | 0,41716 | 0,18826 | NS | 0 | 0 | 0 | 0 | 0 | 0 | 0 | 0 | 0 | 0 | 0 | 0 | 0 | 0 | hypothetical protein                 | NA         | NA                                                                |
| Supercontig_1.175_MV<br>LG_06973_9sp  | -373,4157  | -373,11486 | 0,60168 | 0,2598  | NS | 0 | 0 | 0 | 0 | 0 | 0 | 0 | 0 | 0 | 0 | 0 | 0 | 0 | 0 | hypothetical protein                 | PF01735.11 | PLA2_B(Lysophospholipase catalytic domain)                        |
| Supercontig_1.96_MV<br>LG_06032_6sp   | -574,15514 | -573,70776 | 0,89476 | 0,3607  | NS | 0 | 0 | 0 | 0 | 0 | 0 | 0 | 0 | 0 | 0 | 0 | 0 | 0 | 0 | hypothetical protein                 | TIGR02251  | TIGR02251(HIF-SF_euk: Dullard-like phosphatase domain)            |
| Supercontig_1.1_MVL<br>G_00220_10sp   | -423,43075 | -423,43075 | 0       | 0       | NS | 0 | 0 | 0 | 0 | 0 | 0 | 0 | 0 | 0 | 0 | 0 | 0 | 0 | 0 | hypothetical protein                 | PF06544.5  | DUF1115(Protein of unknown function (DUF1115))                    |
| Supercontig_1.7_MVL<br>G_01324_9sp    | -1211,9315 | -1210,3945 | 3,0739  | 0,78496 | NS | 0 | 0 | 0 | 0 | 0 | 0 | 0 | 0 | 0 | 0 | 0 | 0 | 0 | 0 | hypothetical protein                 | NA         | NA                                                                |
| Supercontig_1.68_MV<br>LG_05247_8sp   | -1110,3992 | -1109,9765 | 0,84544 | 0,34474 | NS | 0 | 0 | 0 | 0 | 0 | 0 | 0 | 0 | 0 | 0 | 0 | 0 | 0 | 0 | hypothetical protein                 | PF00566.11 | TBC(TBC domain)                                                   |
| Supercontig_1.42_MV<br>LG_04082_9sp   | -435,04566 | -435,04552 | 0,00028 | 0,00014 | NS | 0 | 0 | 0 | 0 | 0 | 0 | 0 | 0 | 0 | 0 | 0 | 0 | 0 | 0 | hypothetical protein                 | PF06609.6  | TRI12(Fungal trichothecene efflux pump (TRI12))                   |
| Supercontig_1.35_MV<br>LG_03586_7sp   | -543,98385 | -540,91921 | 6,12928 | 0,95333 | ** | 0 | 0 | 0 | 0 | 0 | 0 | 0 | 0 | 0 | 0 | 0 | 0 | 0 | 0 | hypothetical protein                 | PF00447.10 | HSF_DNA-bind(HSF-type DNA-binding)                                |
| Supercontig_1.13_MV<br>LG_01952_9sp   | -2260,8464 | -2260,8459 | 0,00108 | 0,00054 | NS | 0 | 0 | 0 | 0 | 0 | 0 | 0 | 0 | 0 | 0 | 0 | 0 | 0 | 0 | hypothetical protein                 | PF00118.17 | Cpn60_TCP1(TCP-1/cpn60 chaperonin family)                         |
| Supercontig_1.20_MV<br>LG_02524_10sp  | -527,9349  | -527,92333 | 0,02314 | 0,0115  | NS | 0 | 0 | 0 | 0 | 0 | 0 | 0 | 0 | 0 | 0 | 0 | 0 | 0 | 0 | hypothetical protein                 | PF03151.9  | TPT(Triose-phosphate Transporter family)                          |
| Supercontig_1.112_MV<br>LG_06332_9sp  | -348,37248 | -348,37248 | 0       | 0       | NS | 0 | 0 | 0 | 0 | 0 | 0 | 0 | 0 | 0 | 0 | 0 | 0 | 0 | 0 | hypothetical protein                 | PF05033.9  | Pre-SET(Pre-SET motif)                                            |
| Supercontig_1.161_MV<br>LG_06871_10sp | -624,57467 | -623,99833 | 1,15268 | 0,43805 | NS | 0 | 0 | 0 | 0 | 0 | 0 | 0 | 0 | 0 | 0 | 0 | 0 | 0 | 0 | hypothetical protein                 | PF05686.5  | DUF821(Arabidopsis thaliana protein of unknown function (DUF821)) |
| Supercontig_1.63_MV<br>LG_05089_9sp   | -699,55452 | -699,55392 | 0,0012  | 0,0006  | NS | 0 | 0 | 0 | 0 | 0 | 0 | 0 | 0 | 0 | 0 | 0 | 0 | 0 | 0 | hypothetical protein                 | PF00448.15 | SRP54(SRP54-type protein, GTPase domain)                          |
| Supercontig_1.5_MVL<br>G_00880_7sp    | -901,55987 | -901,55987 | 0       | 0       | NS | 0 | 0 | 0 | 0 | 0 | 0 | 0 | 0 | 0 | 0 | 0 | 0 | 0 | 0 | hypothetical protein                 | NA         | NA                                                                |
| Supercontig_1.60_MV<br>LG_04944_9sp   | -697,97112 | -697,97112 | 0       | 0       | NS | 0 | 0 | 0 | 0 | 0 | 0 | 0 | 0 | 0 | 0 | 0 | 0 | 0 | 0 | hypothetical protein                 | PF05794.6  | Tcp11(T-complex protein 11)                                       |

|                                      |            |            |         |         |    |   |   |   |   |   |   |   |                                         |            |                                                                      |
|--------------------------------------|------------|------------|---------|---------|----|---|---|---|---|---|---|---|-----------------------------------------|------------|----------------------------------------------------------------------|
| Supercontig_1.21_MV<br>LG_02656_10sp | -816,18315 | -816,18315 | 0       | 0       | NS | 0 | 0 | 0 | 0 | 0 | 0 | 0 | hydroxymethylglutaryl-CoA synthase      | PF08540.3  | HMG_CoA_synt_C(Hydroxymethylglutaryl-coenzyme A synthase C terminal) |
| Supercontig_1.2_MVL<br>G_00380_10sp  | -418,9392  | -418,86182 | 0,15476 | 0,07446 | NS | 0 | 0 | 0 | 0 | 0 | 0 | 0 | hypothetical protein                    | PF01485.14 | IBR(IBR domain)                                                      |
| Supercontig_1.51_MV<br>LG_04507_6sp  | -649,70486 | -649,70484 | 0       | 0       | NS | 0 | 0 | 0 | 0 | 0 | 0 | 0 | hypothetical protein                    | NA         | NA                                                                   |
| Supercontig_1.81_MV<br>LG_05682_10sp | -471,34037 | -471,34037 | 0       | 0       | NS | 0 | 0 | 0 | 0 | 0 | 0 | 0 | hypothetical protein                    | PF01984.13 | dsDNA_bind(Double-stranded DNA-binding domain)                       |
| Supercontig_1.20_MV<br>LG_02573_12sp | -502,38517 | -502,38517 | 0       | 0       | NS | 0 | 0 | 0 | 0 | 0 | 0 | 0 | hypothetical protein                    | PF04253.8  | TFR_dimer(Transferrin receptor-like dimerisation domain)             |
| Supercontig_1.1_MVL<br>G_00132_7sp   | -477,17284 | -477,17279 | 0       | 0       | NS | 0 | 0 | 0 | 0 | 0 | 0 | 0 | hypothetical protein                    | PF00657.15 | Lipase_GDSL(GDSL-like Lipase/Acylhydrolase)                          |
| Supercontig_1.194_MV<br>LG_07058_7sp | -434,80139 | -434,80129 | 0,0002  | 0       | NS | 0 | 0 | 0 | 0 | 0 | 0 | 0 | hypothetical protein                    | NA         | NA                                                                   |
| Supercontig_1.28_MV<br>LG_03208_7sp  | -449,35419 | -447,18446 | 4,33946 | 0,88579 | NS | 0 | 0 | 0 | 0 | 0 | 0 | 0 | hypothetical protein                    | PF09802.2  | Sec66(Preprotein translocase subunit Sec66)                          |
| Supercontig_1.4_MVL<br>G_00769_10sp  | -514,61204 | -513,2743  | 2,67548 | 0,73756 | NS | 0 | 0 | 0 | 0 | 0 | 0 | 0 | hypothetical protein                    | PF02146.10 | SIR2(Sir2 family)                                                    |
| Supercontig_1.22_MV<br>LG_02683_11sp | -344,59926 | -344,59882 | 0,00088 | 0,00044 | NS | 0 | 0 | 0 | 0 | 0 | 0 | 0 | hypothetical protein                    | PF02460.11 | Patched(Patched family)                                              |
| Supercontig_1.6_MVL<br>G_01086_10sp  | -846,31921 | -846,28799 | 0,06244 | 0,03074 | NS | 0 | 0 | 0 | 0 | 0 | 0 | 0 | hypothetical protein                    | PF00018.21 | SH3_1(SH3 domain)                                                    |
| Supercontig_1.1_MVL<br>G_00153_8sp   | -859,14082 | -858,98551 | 0,31062 | 0,14385 | NS | 0 | 0 | 0 | 0 | 0 | 0 | 0 | hypothetical protein                    | PF01380.15 | SIS(SIS domain)                                                      |
| Supercontig_1.91_MV<br>LG_05925_10sp | -671,03212 | -670,24235 | 1,57954 | 0,54605 | NS | 0 | 0 | 0 | 0 | 0 | 0 | 0 | hypothetical protein                    | PF00789.13 | UBX(UBX domain)                                                      |
| Supercontig_1.53_MV<br>LG_04598_10sp | -645,61912 | -644,97782 | 1,2826  | 0,47339 | NS | 0 | 0 | 0 | 0 | 0 | 0 | 0 | hypothetical protein                    | NA         | NA                                                                   |
| Supercontig_1.3_MVL<br>G_00540_8sp   | -565,17021 | -564,34881 | 1,6428  | 0,56018 | NS | 0 | 0 | 0 | 0 | 0 | 0 | 0 | hypothetical protein                    | PF01245.13 | Ribosomal_L19(Ribosomal protein L19)                                 |
| Supercontig_1.48_MV<br>LG_04382_8sp  | -504,00777 | -503,55109 | 0,91336 | 0,36662 | NS | 0 | 0 | 0 | 0 | 0 | 0 | 0 | hypothetical protein                    | PF00730.18 | HhH-GPD(HhH-GPD superfamily base excision DNA repair protein)        |
| Supercontig_1.59_MV<br>LG_04894_11sp | -489,07205 | -489,04814 | 0,04782 | 0,02363 | NS | 0 | 0 | 0 | 0 | 0 | 0 | 0 | hypothetical protein                    | PF00172.11 | Zn_clus(Fungal Zn(2)-Cys(6) binuclear cluster domain)                |
| Supercontig_1.3_MVL<br>G_00663_9sp   | -562,74765 | -562,74765 | 0       | 0       | NS | 0 | 0 | 0 | 0 | 0 | 0 | 0 | F-type H+-transporting ATPase subunit D | PF05873.5  | Mt_ATP_synt_D(ATP synthase D chain, mitochondrial (ATP5H))           |
| Supercontig_1.82_MV<br>LG_05710_10sp | -724,1575  | -724,1575  | 0       | 0       | NS | 0 | 0 | 0 | 0 | 0 | 0 | 0 | hypothetical protein                    | NA         | NA                                                                   |
| Supercontig_1.85_MV<br>LG_05786_7sp  | -619,9365  | -619,93632 | 0,00036 | 0,00018 | NS | 0 | 0 | 0 | 0 | 0 | 0 | 0 | hypothetical protein                    | PF00472.13 | RF-1(RF-1 domain)                                                    |
| Supercontig_1.9_MVL<br>G_01526_11sp  | -493,11854 | -493,11854 | 0       | 0       | NS | 0 | 0 | 0 | 0 | 0 | 0 | 0 | hypothetical protein                    | NA         | NA                                                                   |
| Supercontig_1.49_MV<br>LG_04423_8sp  | -459,82287 | -459,00952 | 1,6267  | 0,55663 | NS | 0 | 0 | 0 | 0 | 0 | 0 | 0 | hypothetical protein                    | NA         | NA                                                                   |
| Supercontig_1.1_MVL<br>G_00031_10sp  | -306,97347 | -306,97339 | 0,00016 | 0       | NS | 0 | 0 | 0 | 0 | 0 | 0 | 0 | hypothetical protein                    | PF08613.4  | Cyclin(Cyclin)                                                       |



|                                      |            |            |         |         |    |   |   |   |   |                                                     |            |                                                                           |
|--------------------------------------|------------|------------|---------|---------|----|---|---|---|---|-----------------------------------------------------|------------|---------------------------------------------------------------------------|
| Supercontig_1.30_MV<br>LG_03308_12sp | -501,7011  | -501,68107 | 0,04006 | 0,01983 | NS | 0 | □ | □ | □ | ubiquitin-40S<br>ribosomal protein S27a<br>1        | PF11976.1  | Rad60-SLD(Ubiquitin-2 like<br>Rad60 SUMO-like)                            |
| Supercontig_1.29_MV<br>LG_03247_8sp  | -354,30431 | -354,3039  | 0,00082 | 0,00041 | NS | 0 | □ | □ | □ | hypothetical protein                                | PF03676.7  | UPF0183(Uncharacterised<br>protein family (UPF0183))                      |
| Supercontig_1.26_MV<br>LG_03030_8sp  | -449,57949 | -449,56423 | 0,03052 | 0,01514 | NS | 0 | □ | □ | □ | hypothetical protein                                | PF00070.20 | Pyr_redox(Pyridine nucleotide-<br>disulphide oxidoreductase)              |
| Supercontig_1.53_MV<br>LG_04646_8sp  | -556,97691 | -556,97691 | 0       | 0       | NS | 0 | □ | □ | □ | hypothetical protein                                | PF12597.1  | DUF3767(Protein of unknown<br>function (DUF3767))                         |
| Supercontig_1.4_MVL<br>G_00847_8sp   | -482,7986  | -482,7986  | 0       | 0       | NS | 0 | □ | □ | □ | hypothetical protein                                | NA         | NA                                                                        |
| Supercontig_1.52_MV<br>LG_04594_7sp  | -591,58733 | -591,35395 | 0,46676 | 0,20815 | NS | 0 | □ | □ | □ | hypothetical protein                                | NA         | NA                                                                        |
| Supercontig_1.17_MV<br>LG_02301_9sp  | -337,7158  | -337,7158  | 0       | 0       | NS | 0 | □ | □ | □ | hypothetical protein                                | PF10785.2  | NADH-u_ox-rdase(NADH-<br>ubiquinone oxidoreductase 21<br>kDa subunit)     |
| Supercontig_1.5_MVL<br>G_00987_7sp   | -731,53312 | -731,53312 | 0       | 0       | NS | 0 | □ | □ | □ | NADH-ubiquinone<br>oxidoreductase 24 kDa<br>subunit | PF01257.12 | Complex1_24kDa(Respiratory-<br>chain NADH dehydrogenase 24<br>Kd subunit) |
| Supercontig_1.4_MVL<br>G_00734_10sp  | -681,47152 | -681,18634 | 0,57036 | 0,24812 | NS | 0 | □ | □ | □ | hypothetical protein                                | PF00887.12 | ACBP(Acyl CoA binding protein)                                            |
| Supercontig_1.44_MV<br>LG_04143_8sp  | -723,90845 | -723,90843 | 4.0e-05 | 0       | NS | 0 | □ | □ | □ | electron transfer<br>flavoprotein subunit<br>beta   | PF01012.14 | ETF(Electron transfer<br>flavoprotein domain)                             |
| Supercontig_1.27_MV<br>LG_03066_9sp  | -430,2031  | -430,20308 | 0       | 0       | NS | 0 | □ | □ | □ | hypothetical protein                                | NA         | NA                                                                        |
| Supercontig_1.24_MV<br>LG_02896_9sp  | -476,70783 | -477,58321 | 0       | 0       | NS | 0 | □ | □ | □ | prohibitin-2                                        | PF01145.18 | Band_7(SPFH domain / Band 7<br>family)                                    |
| Supercontig_1.19_MV<br>LG_02510_7sp  | -433,72829 | -433,72828 | 0       | 0       | NS | 0 | □ | □ | □ | hypothetical protein                                | NA         | NA                                                                        |
| Supercontig_1.19_MV<br>LG_02483_9sp  | -1323,2784 | -1323,2784 | 0       | 0       | NS | 0 | □ | □ | □ | hypothetical protein                                | PF00999.14 | Na_H_Exchange(Sodium/hydro<br>gen exchanger family)                       |
| Supercontig_1.88_MV<br>LG_05899_9sp  | -316,27952 | -316,27951 | 0       | 0       | NS | 0 | □ | □ | □ | hypothetical protein                                | NA         | NA                                                                        |
| Supercontig_1.42_MV<br>LG_04056_10sp | -434,7468  | -434,74672 | 0,00016 | 0       | NS | 0 | □ | □ | □ | hypothetical protein                                | PF03169.8  | OPT(OPT oligopeptide<br>transporter protein)                              |
| Supercontig_1.62_MV<br>LG_05015_7sp  | -660,57096 | -658,16666 | 4,8086  | 0,90967 | *  | 0 | □ | □ | □ | hypothetical protein                                | NA         | NA                                                                        |
| Supercontig_1.36_MV<br>LG_03661_9sp  | -505,74126 | -505,43139 | 0,61974 | 0,26646 | NS | 0 | □ | □ | □ | hypothetical protein                                | PF00412.15 | LIM(LIM domain)                                                           |
| Supercontig_1.121_MV<br>LG_06438_6sp | -1501,4632 | -1500,4648 | 1,99692 | 0,63155 | NS | 0 | □ | □ | □ | hypothetical protein                                | PF12257.1  | DUF3608(Protein of unknown<br>function (DUF3608))                         |
| Supercontig_1.21_MV<br>LG_02615_10sp | -793,75149 | -793,75149 | 0       | 0       | NS | 0 | □ | □ | □ | hypothetical protein                                | PF07690.9  | MFS_1(Major Facilitator<br>Superfamily)                                   |
| Supercontig_1.62_MV<br>LG_05033_9sp  | -548,84925 | -548,84921 | 0       | 0       | NS | 0 | □ | □ | □ | AP-1 complex subunit<br>mu-1                        | PF01217.13 | Clat_adaptor_s(Clathrin adaptor<br>complex small chain)                   |
| Supercontig_1.23_MV<br>LG_02809_9sp  | -990,46956 | -990,46956 | 0       | 0       | NS | 0 | □ | □ | □ | hypothetical protein                                | PF10513.2  | EPL1(Enhancer of polycomb-<br>like)                                       |
| Supercontig_1.2_MVL<br>G_00465_8sp   | -445,24289 | -445,19579 | 0,0942  | 0,04601 | NS | 0 | □ | □ | □ | hypothetical protein                                | NA         | NA                                                                        |
| Supercontig_1.10_MV<br>LG_01599_8sp  | -395,5035  | -395,50336 | 0,00028 | 0,00014 | NS | 0 | □ | □ | □ | hypothetical protein                                | PF01553.14 | Acyltransferase(Acyltransferase)                                          |

|                                       |            |            |         |         |    |   |   |   |   |   |                                   |            |                                                                |
|---------------------------------------|------------|------------|---------|---------|----|---|---|---|---|---|-----------------------------------|------------|----------------------------------------------------------------|
| Supercontig_1.29_MV<br>LG_03256_9sp   | -1102,688  | -1100,7151 | 3,94578 | 0,86095 | NS | 0 | □ | □ | □ | □ | AAT family amino acid transporter | TIGR00913  | TIGR00913(2A0310: amino acid permease (yeast))                 |
| Supercontig_1.50_MV<br>LG_04490_12sp  | -579,99409 | -579,13536 | 1,71746 | 0,5763  | NS | 0 | □ | □ | □ | □ | hypothetical protein              | NA         | NA                                                             |
| Supercontig_1.3_MVL<br>G_00669_8sp    | -503,10695 | -503,10695 | 0       | 0       | NS | 0 | □ | □ | □ | □ | hypothetical protein              | PF04185.7  | Phosphoesterase(Phosphoesterase family)                        |
| Supercontig_1.77_MV<br>LG_05567_9sp   | -771,30436 | -771,30436 | 0       | 0       | NS | 0 | □ | □ | □ | □ | hypothetical protein              | NA         | NA                                                             |
| Supercontig_1.69_MV<br>LG_05280_7sp   | -747,97147 | -747,97135 | 0,00024 | 0,00012 | NS | 0 | □ | □ | □ | □ | hypothetical protein              | PF01061.17 | ABC2_membrane(ABC-2 type transporter)                          |
| Supercontig_1.6_MVL<br>G_01158_11sp   | -1154,0883 | -1153,5048 | 1,16696 | 0,44205 | NS | 0 | □ | □ | □ | □ | hypothetical protein              | PF00621.13 | RhoGEF(RhoGEF domain)                                          |
| Supercontig_1.3_MVL<br>G_00658_9sp    | -671,58189 | -671,58189 | 0       | 0       | NS | 0 | □ | □ | □ | □ | transaldolase                     | PF00923.12 | Transaldolase(Transaldolase)                                   |
| Supercontig_1.6_MVL<br>G_01102_10sp   | -901,25333 | -901,25333 | 0       | 0       | NS | 0 | □ | □ | □ | □ | hypothetical protein              | PF04851.8  | ResIII(Type III restriction enzyme, res subunit)               |
| Supercontig_1.25_MV<br>LG_02920_8sp   | -1051,4766 | -1050,7108 | 1,53174 | 0,53507 | NS | 0 | □ | □ | □ | □ | hypothetical protein              | NA         | NA                                                             |
| Supercontig_1.5_MVL<br>G_00904_9sp    | -642,54363 | -642,54363 | 0       | 0       | NS | 0 | □ | □ | □ | □ | hypothetical protein              | PF00168.23 | C2(C2 domain)                                                  |
| Supercontig_1.38_MV<br>LG_03796_8sp   | -550,64192 | -550,64192 | 0       | 0       | NS | 0 | □ | □ | □ | □ | hypothetical protein              | PF00995.16 | Sec1(Sec1 family)                                              |
| Supercontig_1.80_MV<br>LG_05647_9sp   | -515,24623 | -515,24623 | 0       | 0       | NS | 0 | □ | □ | □ | □ | hexokinase                        | PF00349.14 | Hexokinase_1(Hexokinase)                                       |
| Supercontig_1.79_MV<br>LG_05609_10sp  | -1037,8512 | -1037,8512 | 0       | 0       | NS | 0 | □ | □ | □ | □ | hypothetical protein              | PF05422.5  | SIN1(Stress-activated map kinase interacting protein 1 (SIN1)) |
| Supercontig_1.42_MV<br>LG_04078_11sp  | -575,53686 | -575,15751 | 0,7587  | 0,31569 | NS | 0 | □ | □ | □ | □ | proteasome component PRE2         | PF00227.19 | Proteasome(Proteasome subunit)                                 |
| Supercontig_1.34_MV<br>LG_03559_8sp   | -424,16115 | -424,16114 | 0       | 0       | NS | 0 | □ | □ | □ | □ | hypothetical protein              | PF03694.6  | Erg28(Erg28 like protein)                                      |
| Supercontig_1.117_MV<br>LG_06391_9sp  | -327,74533 | -327,74533 | 0       | 0       | NS | 0 | □ | □ | □ | □ | hypothetical protein              | TIGR00592  | TIGR00592(pol2: DNA polymerase (pol2))                         |
| Supercontig_1.229_MV<br>LG_07183_8sp  | -757,41798 | -757,41795 | 0       | 0       | NS | 0 | □ | □ | □ | □ | hypothetical protein              | PF05346.4  | DUF747(Eukaryotic membrane protein family)                     |
| Supercontig_1.22_MV<br>LG_02723_8sp   | -360,62983 | -360,62973 | 0,0002  | 0       | NS | 0 | □ | □ | □ | □ | hypothetical protein              | PF03162.6  | Y_phosphatase2(Tyrosine phosphatase family)                    |
| Supercontig_1.5_MVL<br>G_00976_9sp    | -322,93278 | -322,93236 | 0,00084 | 0,00042 | NS | 0 | □ | □ | □ | □ | proteasome subunit alpha type-5   | PF00227.19 | Proteasome(Proteasome subunit)                                 |
| Supercontig_1.25_MV<br>LG_02932_9sp   | -799,1321  | -799,13197 | 0,00026 | 0,00013 | NS | 0 | □ | □ | □ | □ | hypothetical protein              | NA         | NA                                                             |
| Supercontig_1.47_MV<br>LG_04333_7sp   | -731,16259 | -729,64679 | 3,0316  | 0,78037 | NS | 0 | □ | □ | □ | □ | hypothetical protein              | PF01585.16 | G-patch(G-patch domain)                                        |
| Supercontig_1.36_MV<br>LG_03643_12sp  | -455,79632 | -455,28662 | 1,0194  | 0,39932 | NS | 0 | □ | □ | □ | □ | hypothetical protein              | PF00443.22 | UCH(Ubiquitin carboxyl-terminal hydrolase)                     |
| Supercontig_1.122_MV<br>LG_06453_10sp | -587,55576 | -587,55576 | 0       | 0       | NS | 0 | □ | □ | □ | □ | hypothetical protein              | NA         | NA                                                             |
| Supercontig_1.57_MV<br>LG_04813_9sp   | -684,95651 | -684,95651 | 0       | 0       | NS | 0 | □ | □ | □ | □ | glucose-regulated protein         | TIGR02350  | TIGR02350(prok_dnaK: chaperone protein DnaK)                   |
| Supercontig_1.1_MVL<br>G_00217_9sp    | -544,8114  | -544,8114  | 0       | 0       | NS | 0 | □ | □ | □ | □ | hypothetical protein              | PF00107.19 | ADH_zinc_N(Zinc-binding dehydrogenase)                         |

|                                       |            |            |         |         |    |   |   |   |   |   |                                                           |            |                                                                      |
|---------------------------------------|------------|------------|---------|---------|----|---|---|---|---|---|-----------------------------------------------------------|------------|----------------------------------------------------------------------|
| Supercontig_1.73_MV<br>LG_05427_10sp  | -232,35703 | -232,35668 | 0,0007  | 0,00035 | NS | 0 | □ | □ | □ | □ | proteasome subunit<br>beta type-3                         | PF00227.19 | Proteasome(Proteasome<br>subunit)                                    |
| Supercontig_1.63_MV<br>LG_05091_10sp  | -966,90815 | -966,90815 | 0       | 0       | NS | 0 | □ | □ | □ | □ | hypothetical protein                                      | PF11559.1  | ADIP(Afadin- and alpha -actinin-<br>Binding)                         |
| Supercontig_1.81_MV<br>LG_05671_7sp   | -390,00155 | -389,21055 | 1,582   | 0,54661 | NS | 0 | □ | □ | □ | □ | hypothetical protein                                      | PF00625.14 | Guanylate_kin(Guanylate kinase)                                      |
| Supercontig_1.92_MV<br>LG_05967_6sp   | -1282,1713 | -1282,1594 | 0,02384 | 0,01185 | NS | 0 | □ | □ | □ | □ | hypothetical protein                                      | PF04388.5  | Hamartin(Hamartin protein)                                           |
| Supercontig_1.17_MV<br>LG_02328_8sp   | -251,84146 | -251,84127 | 0,00038 | 0,00019 | NS | 0 | □ | □ | □ | □ | 60S ribosomal protein<br>L33-B                            | PF01247.11 | Ribosomal_L35Ae(Ribosomal<br>protein L35Ae)                          |
| Supercontig_1.207_MV<br>LG_07116_7sp  | -409,04663 | -409,04663 | 0       | 0       | NS | 0 | □ | □ | □ | □ | cytoplasmic tRNA 2-<br>thiolation protein 1               | PF01171.13 | ATP_bind_3(PP-loop family)                                           |
| Supercontig_1.38_MV<br>LG_03789_11sp  | -570,02838 | -569,99581 | 0,06514 | 0,03205 | NS | 0 | □ | □ | □ | □ | hypothetical protein                                      | PF01425.14 | Amidase(Amidase)                                                     |
| Supercontig_1.26_MV<br>LG_03025_9sp   | -590,73306 | -590,7327  | 0,00072 | 0,00036 | NS | 0 | □ | □ | □ | □ | C-1-tetrahydrofolate<br>synthase, cytoplasmic             | PF01268.12 | FTHFS(Formate--<br>tetrahydrofolate ligase)                          |
| Supercontig_1.18_MV<br>LG_02347_11sp  | -467,73731 | -467,73731 | 0       | 0       | NS | 0 | □ | □ | □ | □ | hypothetical protein                                      | NA         | NA                                                                   |
| Supercontig_1.56_MV<br>LG_04759_7sp   | -857,57871 | -857,57871 | 0       | 0       | NS | 0 | □ | □ | □ | □ | hypothetical protein                                      | NA         | NA                                                                   |
| Supercontig_1.1_MVL<br>G_00252_7sp    | -402,45114 | -402,39804 | 0,1062  | 0,05171 | NS | 0 | □ | □ | □ | □ | hypothetical protein                                      | NA         | NA                                                                   |
| Supercontig_1.84_MV<br>LG_05775_10sp  | -386,79987 | -386,79987 | 0       | 0       | NS | 0 | □ | □ | □ | □ | hypothetical protein                                      | PF02431.8  | Chalcone(Chalcone-flavanone<br>isomerase)                            |
| Supercontig_1.35_MV<br>LG_03603_6sp   | -1209,838  | -1209,7503 | 0,17536 | 0,08395 | NS | 0 | □ | □ | □ | □ | hypothetical protein                                      | PF00076.15 | RRM_1(RNA recognition motif.<br>(a.k.a. RRM, RBD, or RNP<br>domain)) |
| Supercontig_1.1_MVL<br>G_00091_9sp    | -683,87211 | -683,59066 | 0,5629  | 0,24531 | NS | 0 | □ | □ | □ | □ | hypothetical protein                                      | PF01529.13 | zf-DHHC(DHHC zinc finger<br>domain)                                  |
| Supercontig_1.2_MVL<br>G_00473_10sp   | -476,66632 | -476,66617 | 0,0003  | 0,00015 | NS | 0 | □ | □ | □ | □ | hypothetical protein                                      | PF04851.8  | ResIII(Type III restriction<br>enzyme, res subunit)                  |
| Supercontig_1.78_MV<br>LG_05574_11sp  | -346,09934 | -346,09922 | 0,00024 | 0,00012 | NS | 0 | □ | □ | □ | □ | hypothetical protein                                      | PF01544.11 | CorA(CorA-like Mg2+ transporter<br>protein)                          |
| Supercontig_1.17_MV<br>LG_02277_6sp   | -923,30693 | -923,30693 | 0       | 0       | NS | 0 | □ | □ | □ | □ | fimbrin                                                   | PF00307.24 | CH(Calponin homology (CH)<br>domain)                                 |
| Supercontig_1.4_MVL<br>G_00877_12sp   | -441,33005 | -439,90845 | 2,8432  | 0,75867 | NS | 0 | □ | □ | □ | □ | hypothetical protein                                      | PF06687.5  | SUR7(SUR7/Pall family)                                               |
| Supercontig_1.4_MVL<br>G_00696_6sp    | -611,1     | -611,1     | 0       | 0       | NS | 0 | □ | □ | □ | □ | hypothetical protein                                      | PF01557.11 | FAA_hydrolase(Fumarylacetoac<br>etate (FAA) hydrolase family)        |
| Supercontig_1.82_MV<br>LG_05701_8sp   | -1031,1274 | -1031,1274 | 0       | 0       | NS | 0 | □ | □ | □ | □ | omega-6 fatty acid<br>desaturase (delta-12<br>desaturase) | PF11960.1  | DUF3474(Domain of unknown<br>function (DUF3474))                     |
| Supercontig_1.111_MV<br>LG_06304_7sp  | -245,12497 | -245,12497 | 0       | 0       | NS | 0 | □ | □ | □ | □ | hypothetical protein                                      | PF00070.20 | Pyr_redox(Pyridine nucleotide-<br>disulphide oxidoreductase)         |
| Supercontig_1.99_MV<br>LG_06110_10sp  | -1145,7251 | -1143,841  | 3,76818 | 0,84803 | NS | 0 | □ | □ | □ | □ | hypothetical protein                                      | PF07716.8  | bZIP_2(Basic region leucine<br>zipper)                               |
| Supercontig_1.94_MV<br>LG_05990_8sp   | -1188,1545 | -1187,1948 | 1,91924 | 0,61696 | NS | 0 | □ | □ | □ | □ | hypothetical protein                                      | PF05188.10 | MutS_II(MutS domain II)                                              |
| Supercontig_1.143_MV<br>LG_06720_10sp | -573,61212 | -573,61197 | 0,0003  | 0,00015 | NS | 0 | □ | □ | □ | □ | hypothetical protein                                      | PF04116.6  | FA_hydroxylase(Fatty acid<br>hydroxylase superfamily)                |

|                                      |            |            |         |         |    |   |   |   |   |   |   |   |   |   |   |   |   |   |   |   |                                      |            |                                                          |
|--------------------------------------|------------|------------|---------|---------|----|---|---|---|---|---|---|---|---|---|---|---|---|---|---|---|--------------------------------------|------------|----------------------------------------------------------|
| Supercontig_1.68_MV<br>LG_05263_9sp  | -589,0294  | -589,0294  | 0       | 0       | NS | 0 | 0 | 0 | 0 | 0 | 0 | 0 | 0 | 0 | 0 | 0 | 0 | 0 | 0 | 0 | hypothetical protein                 | PF11635.1  | Med16(Mediator complex subunit 16)                       |
| Supercontig_1.78_MV<br>LG_05600_8sp  | -1168,8307 | -1168,8306 | 0,00016 | 0       | NS | 0 | 0 | 0 | 0 | 0 | 0 | 0 | 0 | 0 | 0 | 0 | 0 | 0 | 0 | 0 | hypothetical protein                 | PF00481.14 | PP2C(Protein phosphatase 2C)                             |
| Supercontig_1.80_MV<br>LG_05645_9sp  | -318,54934 | -318,54897 | 0,00074 | 0,00037 | NS | 0 | 0 | 0 | 0 | 0 | 0 | 0 | 0 | 0 | 0 | 0 | 0 | 0 | 0 | 0 | 26S protease regulatory subunit 8    | PF07724.7  | AAA_2(AAA domain (Cdc48 subfamily))                      |
| Supercontig_1.75_MV<br>LG_05489_6sp  | -738,63645 | -736,8317  | 3,6095  | 0,83548 | NS | 0 | 0 | 0 | 0 | 0 | 0 | 0 | 0 | 0 | 0 | 0 | 0 | 0 | 0 | 0 | hypothetical protein                 | NA         | NA                                                       |
| Supercontig_1.123_MV<br>LG_06480_6sp | -524,60842 | -524,13245 | 0,95194 | 0,37872 | NS | 0 | 0 | 0 | 0 | 0 | 0 | 0 | 0 | 0 | 0 | 0 | 0 | 0 | 0 | 0 | hypothetical protein                 | PF00459.18 | Inositol_P(Inositol monophosphatase family)              |
| Supercontig_1.27_MV<br>LG_03059_9sp  | -1175,7122 | -1174,1154 | 3,19362 | 0,79746 | NS | 0 | 0 | 0 | 0 | 0 | 0 | 0 | 0 | 0 | 0 | 0 | 0 | 0 | 0 | 0 | hypothetical protein                 | NA         | NA                                                       |
| Supercontig_1.6_MVL<br>G_01129_10sp  | -439,11291 | -439,11255 | 0,00072 | 0,00036 | NS | 0 | 0 | 0 | 0 | 0 | 0 | 0 | 0 | 0 | 0 | 0 | 0 | 0 | 0 | 0 | hypothetical protein                 | PF00270.22 | DEAD(DEAD/DEAH box helicase)                             |
| Supercontig_1.64_MV<br>LG_05093_9sp  | -1145,836  | -1145,836  | 0       | 0       | NS | 0 | 0 | 0 | 0 | 0 | 0 | 0 | 0 | 0 | 0 | 0 | 0 | 0 | 0 | 0 | hypothetical protein                 | TIGR00879  | TIGR00879(SP: MFS transporter, sugar porter (SP) family) |
| Supercontig_1.66_MV<br>LG_05186_9sp  | -315,5359  | -315,53578 | 0,00024 | 0,00012 | NS | 0 | 0 | 0 | 0 | 0 | 0 | 0 | 0 | 0 | 0 | 0 | 0 | 0 | 0 | 0 | hypothetical protein                 | PF00956.11 | NAP(Nucleosome assembly protein (NAP))                   |
| Supercontig_1.14_MV<br>LG_02010_12sp | -697,97955 | -696,59057 | 2,77796 | 0,75067 | NS | 0 | 0 | 0 | 0 | 0 | 0 | 0 | 0 | 0 | 0 | 0 | 0 | 0 | 0 | 0 | hypothetical protein                 | PF00616.12 | RasGAP(GTPase-activator protein for Ras-like GTPase)     |
| Supercontig_1.62_MV<br>LG_05006_9sp  | -966,62339 | -966,62303 | 0,00072 | 0,00036 | NS | 0 | 0 | 0 | 0 | 0 | 0 | 0 | 0 | 0 | 0 | 0 | 0 | 0 | 0 | 0 | 26S proteasome regulatory subunit N1 | PF01851.15 | PC_rep(Proteasome/cyclosome repeat)                      |
| Supercontig_1.51_MV<br>LG_04529_7sp  | -1108,4217 | -1108,4217 | 0       | 0       | NS | 0 | 0 | 0 | 0 | 0 | 0 | 0 | 0 | 0 | 0 | 0 | 0 | 0 | 0 | 0 | hypothetical protein                 | PF04515.5  | Choline_transpo(Plasma-membrane choline transporter)     |
| Supercontig_1.62_MV<br>LG_05043_7sp  | -477,30982 | -477,30982 | 0       | 0       | NS | 0 | 0 | 0 | 0 | 0 | 0 | 0 | 0 | 0 | 0 | 0 | 0 | 0 | 0 | 0 | large subunit ribosomal protein LP1  | PF00428.12 | Ribosomal_60s(60s Acidic ribosomal protein)              |
| Supercontig_1.192_MV<br>LG_07050_7sp | -581,50097 | -580,73963 | 1,52268 | 0,53296 | NS | 0 | 0 | 0 | 0 | 0 | 0 | 0 | 0 | 0 | 0 | 0 | 0 | 0 | 0 | 0 | hypothetical protein                 | NA         | NA                                                       |
| Supercontig_1.14_MV<br>LG_02027_11sp | -1833,9681 | -1833,4951 | 0,94606 | 0,37689 | NS | 0 | 0 | 0 | 0 | 0 | 0 | 0 | 0 | 0 | 0 | 0 | 0 | 0 | 0 | 0 | hypothetical protein                 | PF00560.26 | LRR_1(Leucine Rich Repeat)                               |
| Supercontig_1.5_MVL<br>G_01003_6sp   | -741,35133 | -740,89746 | 0,90774 | 0,36483 | NS | 0 | 0 | 0 | 0 | 0 | 0 | 0 | 0 | 0 | 0 | 0 | 0 | 0 | 0 | 0 | hypothetical protein                 | NA         | NA                                                       |
| Supercontig_1.13_MV<br>LG_01948_10sp | -690,98393 | -690,45479 | 1,05828 | 0,41089 | NS | 0 | 0 | 0 | 0 | 0 | 0 | 0 | 0 | 0 | 0 | 0 | 0 | 0 | 0 | 0 | hypothetical protein                 | NA         | NA                                                       |
| Supercontig_1.88_MV<br>LG_05892_9sp  | -861,59143 | -861,29851 | 0,58584 | 0,25392 | NS | 0 | 0 | 0 | 0 | 0 | 0 | 0 | 0 | 0 | 0 | 0 | 0 | 0 | 0 | 0 | hypothetical protein                 | PF07779.5  | Cas1p(Cas1p-like protein)                                |
| Supercontig_1.22_MV<br>LG_02759_9sp  | -576,60953 | -576,54444 | 0,13018 | 0,06302 | NS | 0 | 0 | 0 | 0 | 0 | 0 | 0 | 0 | 0 | 0 | 0 | 0 | 0 | 0 | 0 | hypothetical protein                 | PF07766.6  | LETM1(LETM1-like protein)                                |
| Supercontig_1.50_MV<br>LG_04464_7sp  | -857,6945  | -857,61761 | 0,15378 | 0,07401 | NS | 0 | 0 | 0 | 0 | 0 | 0 | 0 | 0 | 0 | 0 | 0 | 0 | 0 | 0 | 0 | hypothetical protein                 | NA         | NA                                                       |
| Supercontig_1.12_MV<br>LG_01832_6sp  | -387,69998 | -387,43158 | 0,5368  | 0,2354  | NS | 0 | 0 | 0 | 0 | 0 | 0 | 0 | 0 | 0 | 0 | 0 | 0 | 0 | 0 | 0 | hypothetical protein                 | PF01545.14 | Cation_efflux(Cation efflux family)                      |
| Supercontig_1.15_MV<br>LG_02100_6sp  | -716,93562 | -716,93562 | 0       | 0       | NS | 0 | 0 | 0 | 0 | 0 | 0 | 0 | 0 | 0 | 0 | 0 | 0 | 0 | 0 | 0 | hypothetical protein                 | PF10354.2  | DUF2431(Domain of unknown function (DUF2431))            |
| Supercontig_1.36_MV<br>LG_03694_8sp  | -961,70729 | -961,51968 | 0,37522 | 0,17106 | NS | 0 | 0 | 0 | 0 | 0 | 0 | 0 | 0 | 0 | 0 | 0 | 0 | 0 | 0 | 0 | hypothetical protein                 | NA         | NA                                                       |
| Supercontig_1.38_MV<br>LG_03776_7sp  | -824,7213  | -824,7213  | 0       | 0       | NS | 0 | 0 | 0 | 0 | 0 | 0 | 0 | 0 | 0 | 0 | 0 | 0 | 0 | 0 | 0 | hypothetical protein                 | NA         | NA                                                       |

|                                      |            |            |         |         |    |   |  |  |  |  |                                            |            |                                                            |
|--------------------------------------|------------|------------|---------|---------|----|---|--|--|--|--|--------------------------------------------|------------|------------------------------------------------------------|
| Supercontig_1.41_MV<br>LG_04018_7sp  | -900,05868 | -899,10982 | 1,89772 | 0,61282 | NS | 0 |  |  |  |  | hypothetical protein                       | NA         | NA                                                         |
| Supercontig_1.139_MV<br>LG_06667_9sp | -427,10705 | -427,10705 | 0       | 0       | NS | 0 |  |  |  |  | 20S proteasome<br>subunit beta 1           | PF00227.19 | Proteasome(Proteasome<br>subunit)                          |
| Supercontig_1.79_MV<br>LG_05621_9sp  | -351,5342  | -350,94141 | 1,18558 | 0,44722 | NS | 0 |  |  |  |  | hypothetical protein                       | PF11779.1  | DUF3317(Protein of unknown<br>function (DUF3317))          |
| Supercontig_1.23_MV<br>LG_02822_7sp  | -593,48663 | -593,46302 | 0,04722 | 0,02333 | NS | 0 |  |  |  |  | hypothetical protein                       | PF01435.11 | Peptidase_M48(Peptidase family<br>M48)                     |
| Supercontig_1.82_MV<br>LG_05707_7sp  | -987,4729  | -987,47282 | 0,00016 | 0       | NS | 0 |  |  |  |  | hydroxyacid-oxoacid<br>transhydrogenase    | PF00465.12 | Fe-ADH(Iron-containing alcohol<br>dehydrogenase)           |
| Supercontig_1.53_MV<br>LG_04639_12sp | -368,66632 | -368,66609 | 0,00046 | 0       | NS | 0 |  |  |  |  | hypothetical protein                       | NA         | NA                                                         |
| Supercontig_1.55_MV<br>LG_04718_9sp  | -412,98421 | -412,98412 | 0,00018 | 0       | NS | 0 |  |  |  |  | hypothetical protein                       | PF00400.25 | WD40(WD domain, G-beta<br>repeat)                          |
| Supercontig_1.1_MVL<br>G_00253_7sp   | -805,82942 | -805,82865 | 0,00154 | 0       | NS | 0 |  |  |  |  | hypothetical protein                       | PF00909.14 | Ammonium_transp(Ammonium<br>Transporter Family)            |
| Supercontig_1.122_MV<br>LG_06458_7sp | -783,79665 | -783,79665 | 0       | 0       | NS | 0 |  |  |  |  | hypothetical protein                       | PF03060.8  | NPD(2-nitropropane<br>dioxxygenase)                        |
| Supercontig_1.20_MV<br>LG_02533_10sp | -794,10752 | -794,10752 | 0       | 0       | NS | 0 |  |  |  |  | hypothetical protein                       | NA         | NA                                                         |
| Supercontig_1.42_MV<br>LG_04059_8sp  | -693,16615 | -692,43985 | 1,4526  | 0,5163  | NS | 0 |  |  |  |  | hypothetical protein                       | PF00333.13 | Ribosomal_S5(Ribosomal<br>protein S5, N-terminal domain)   |
| Supercontig_1.86_MV<br>LG_05826_7sp  | -548,10115 | -547,9972  | 0,2079  | 0,09873 | NS | 0 |  |  |  |  | hypothetical protein                       | NA         | NA                                                         |
| Supercontig_1.38_MV<br>LG_03813_9sp  | -1142,3983 | -1142,398  | 0,00062 | 0,00031 | NS | 0 |  |  |  |  | hypothetical protein                       | NA         | NA                                                         |
| Supercontig_1.4_MVL<br>G_00832_9sp   | -954,60036 | -954,60036 | 0       | 0       | NS | 0 |  |  |  |  | hypothetical protein                       | PF04083.9  | Abhydro_lipase(ab-hydrolase<br>associated lipase region)   |
| Supercontig_1.185_MV<br>LG_07018_8sp | -1156,6685 | -1156,6684 | 0,00022 | 0,00011 | NS | 0 |  |  |  |  | hypothetical protein                       | PF08623.3  | TIP120(TATA-binding protein<br>interacting (TIP20))        |
| Supercontig_1.24_MV<br>LG_02856_7sp  | -1116,9147 | -1116,2928 | 1,2438  | 0,46308 | NS | 0 |  |  |  |  | hypothetical protein                       | PF02515.10 | CoA_transf_3(CoA-transferase<br>family III)                |
| Supercontig_1.1_MVL<br>G_00183_8sp   | -576,23187 | -576,23187 | 0       | 0       | NS | 0 |  |  |  |  | L-lactate<br>dehydrogenase<br>(cytochrome) | PF01070.11 | FMN_dh(FMN-dependent<br>dehydrogenase)                     |
| Supercontig_1.39_MV<br>LG_03835_8sp  | -777,9512  | -777,9512  | 0       | 0       | NS | 0 |  |  |  |  | hypothetical protein                       | PF01997.9  | Translin(Translin family)                                  |
| Supercontig_1.156_MV<br>LG_06828_7sp | -404,61559 | -404,36719 | 0,4968  | 0,21995 | NS | 0 |  |  |  |  | hypothetical protein                       | NA         | NA                                                         |
| Supercontig_1.107_MV<br>LG_06251_7sp | -672,93346 | -672,93346 | 0       | 0       | NS | 0 |  |  |  |  | hypothetical protein                       | NA         | NA                                                         |
| Supercontig_1.63_MV<br>LG_05059_9sp  | -355,19087 | -355,19087 | 0       | 0       | NS | 0 |  |  |  |  | hypothetical protein                       | PF06110.4  | DUF953(Eukaryotic protein of<br>unknown function (DUF953)) |
| Supercontig_1.39_MV<br>LG_03845_8sp  | -464,27191 | -464,1378  | 0,26822 | 0,12551 | NS | 0 |  |  |  |  | hypothetical protein                       | PF09668.3  | Asp_protease(Aspartyl protease)                            |
| Supercontig_1.15_MV<br>LG_02106_9sp  | -1201,5165 | -1199,2723 | 4,48844 | 0,89399 | NS | 0 |  |  |  |  | hypothetical protein                       | PF01501.13 | Glyco_transf_8(Glycosyl<br>transferase family 8)           |
| Supercontig_1.15_MV<br>LG_02109_8sp  | -961,43016 | -961,43016 | 0       | 0       | NS | 0 |  |  |  |  | hypothetical protein                       | PF00248.14 | Aldo_ket_red(Aldo/keto<br>reductase family)                |
| Supercontig_1.33_MV<br>LG_03451_10sp | -436,05588 | -436,0558  | 0,00016 | 0       | NS | 0 |  |  |  |  | argininosuccinate<br>synthase              | PF00764.12 | Arginosuc_synth(Arginosuccinat<br>e synthase)              |



|                                       |            |            |         |         |    |   |  |  |  |  |                            |            |                                                                    |
|---------------------------------------|------------|------------|---------|---------|----|---|--|--|--|--|----------------------------|------------|--------------------------------------------------------------------|
| Supercontig_1.88_MV<br>LG_05901_10sp  | -774,77262 | -773,78439 | 1,97646 | 0,62777 | NS | 0 |  |  |  |  | hypothetical protein       | PF02518.19 | HATPase_c(Histidine kinase-, DNA gyrase B-, and HSP90-like ATPase) |
| Supercontig_1.92_MV<br>LG_05953_10sp  | -373,22122 | -373,2165  | 0,00944 | 0,00471 | NS | 0 |  |  |  |  | hypothetical protein       | PF08232.5  | Striatin(Striatin family)                                          |
| Supercontig_1.5_MVL<br>G_00923_10sp   | -1139,7993 | -1138,6724 | 2,25378 | 0,67596 | NS | 0 |  |  |  |  | hypothetical protein       | NA         | NA                                                                 |
| Supercontig_1.78_MV<br>LG_05596_8sp   | -286,4879  | -286,48784 | 0,00012 | 0       | NS | 0 |  |  |  |  | hypothetical protein       | PF03992.9  | ABM(Antibiotic biosynthesis monooxygenase)                         |
| Supercontig_1.16_MV<br>LG_02219_9sp   | -1022,831  | -1022,831  | 0       | 0       | NS | 0 |  |  |  |  | hypothetical protein       | PF00580.14 | UvrD-helicase(UvrD/REP helicase)                                   |
| Supercontig_1.95_MV<br>LG_06021_7sp   | -765,08406 | -765,08406 | 0       | 0       | NS | 0 |  |  |  |  | hypothetical protein       | PF03876.10 | RNA_pol_Rpb7_N(RNA polymerase Rpb7-like, N-terminal domain)        |
| Supercontig_1.104_MV<br>LG_06201_7sp  | -596,65166 | -596,65166 | 0       | 0       | NS | 0 |  |  |  |  | hypothetical protein       | PF05719.4  | GPP34(Golgi phosphoprotein 3 (GPP34))                              |
| Supercontig_1.4_MVL<br>G_00698_9sp    | -1195,3831 | -1194,6218 | 1,52264 | 0,53295 | NS | 0 |  |  |  |  | hypothetical protein       | PF07819.6  | PGAP1(PGAP1-like protein)                                          |
| Supercontig_1.50_MV<br>LG_04477_7sp   | -756,74531 | -756,74531 | 0       | 0       | NS | 0 |  |  |  |  | hypothetical protein       | NA         | NA                                                                 |
| Supercontig_1.2_MVL<br>G_00460_6sp    | -279,44902 | -279,44896 | 0,00012 | 0       | NS | 0 |  |  |  |  | hypothetical protein       | NA         | NA                                                                 |
| Supercontig_1.67_MV<br>LG_05237_8sp   | -688,0637  | -686,32711 | 3,47318 | 0,82388 | NS | 0 |  |  |  |  | hypothetical protein       | PF00795.15 | CN_hydrolase(Carbon-nitrogen hydrolase)                            |
| Supercontig_1.100_MV<br>LG_06130_9sp  | -658,59405 | -658,5938  | 0,0005  | 0,00025 | NS | 0 |  |  |  |  | hypothetical protein       | PF00324.14 | AA_permease(Amino acid permease)                                   |
| Supercontig_1.84_MV<br>LG_05781_9sp   | -878,6087  | -878,6087  | 0       | 0       | NS | 0 |  |  |  |  | hypothetical protein       | PF12271.1  | Chs3p(Chitin synthase III catalytic subunit)                       |
| Supercontig_1.14_MV<br>LG_02017_10sp  | -1241,1506 | -1241,1506 | 0       | 0       | NS | 0 |  |  |  |  | hypothetical protein       | TIGR00800  | TIGR00800(ncs1: NCS1 nucleoside transporter family)                |
| Supercontig_1.2_MVL<br>G_00369_11sp   | -474,74626 | -474,74626 | 0       | 0       | NS | 0 |  |  |  |  | hypothetical protein       | NA         | NA                                                                 |
| Supercontig_1.39_MV<br>LG_03864_9sp   | -352,44538 | -352,4453  | 0,00016 | 0       | NS | 0 |  |  |  |  | protein hob3               | PF03114.11 | BAR(BAR domain)                                                    |
| Supercontig_1.143_MV<br>LG_06716_12sp | -561,33893 | -558,96368 | 4,7505  | 0,90701 | *  | 0 |  |  |  |  | hypothetical protein       | NA         | NA                                                                 |
| Supercontig_1.7_MVL<br>G_01292_8sp    | -739,04592 | -738,70363 | 0,68458 | 0,28986 | NS | 0 |  |  |  |  | hypothetical protein       | PF01205.12 | UPF0029(Uncharacterized protein family UPF0029)                    |
| Supercontig_1.51_MV<br>LG_04505_10sp  | -495,68668 | -495,57424 | 0,22488 | 0,10635 | NS | 0 |  |  |  |  | hypothetical protein       | NA         | NA                                                                 |
| Supercontig_1.7_MVL<br>G_01272_7sp    | -862,18486 | -862,18149 | 0,00674 | 0,00336 | NS | 0 |  |  |  |  | hypothetical protein       | NA         | NA                                                                 |
| Supercontig_1.40_MV<br>LG_03929_11sp  | -757,27725 | -756,80101 | 0,95248 | 0,37889 | NS | 0 |  |  |  |  | hypothetical protein       | PF04757.7  | Pex2_Pex12(Pex2 / Pex12 amino terminal region)                     |
| Supercontig_1.10_MV<br>LG_01625_10sp  | -346,82263 | -346,82263 | 0       | 0       | NS | 0 |  |  |  |  | calcium-binding protein 39 | PF08569.4  | Mo25(Mo25-like)                                                    |
| Supercontig_1.47_MV<br>LG_04348_9sp   | -534,98008 | -534,98007 | 0       | 0       | NS | 0 |  |  |  |  | hypothetical protein       | PF02257.8  | RFX_DNA_binding(RFX DNA-binding domain)                            |
| Supercontig_1.41_MV<br>LG_03994_9sp   | -408,34848 | -408,34848 | 0       | 0       | NS | 0 |  |  |  |  | hypothetical protein       | NA         | NA                                                                 |
| Supercontig_1.46_MV<br>LG_04267_10sp  | -1020,6245 | -1020,6245 | 0       | 0       | NS | 0 |  |  |  |  | hypothetical protein       | PF06738.5  | DUF1212(Protein of unknown function (DUF1212))                     |

|                                       |            |            |         |         |    |   |   |   |   |   |                                                          |            |                                                                              |
|---------------------------------------|------------|------------|---------|---------|----|---|---|---|---|---|----------------------------------------------------------|------------|------------------------------------------------------------------------------|
| Supercontig_1.1_MVL<br>G_00230_8sp    | -426,00922 | -423,71272 | 4,593   | 0,89939 | NS | 0 | □ | □ | □ | □ | hypothetical protein                                     | NA         | NA                                                                           |
| Supercontig_1.55_MV<br>LG_04732_6sp   | -731,17785 | -731,17779 | 0,00012 | 0       | NS | 0 | □ | □ | □ | □ | ornithine<br>aminotransferase                            | PF00202.14 | Aminotran_3(Aminotransferase<br>class-III)                                   |
| Supercontig_1.27_MV<br>LG_03075_11sp  | -487,83477 | -487,83455 | 0,00044 | 0,00022 | NS | 0 | □ | □ | □ | □ | hypothetical protein                                     | PF10510.2  | PIG-S(Phosphatidylinositol-<br>glycan biosynthesis class S<br>protein)       |
| Supercontig_1.46_MV<br>LG_04289_8sp   | -482,17654 | -482,17654 | 0       | 0       | NS | 0 | □ | □ | □ | □ | hypothetical protein                                     | NA         | NA                                                                           |
| Supercontig_1.15_MV<br>LG_02076_8sp   | -1056,9694 | -1056,9694 | 0       | 0       | NS | 0 | □ | □ | □ | □ | hypothetical protein                                     | PF08313.5  | SCA7(SCA7)                                                                   |
| Supercontig_1.36_MV<br>LG_03688_10sp  | -366,99075 | -366,30796 | 1,36558 | 0,49479 | NS | 0 | □ | □ | □ | □ | hypothetical protein                                     | NA         | NA                                                                           |
| Supercontig_1.123_MV<br>LG_06481_9sp  | -1153,4696 | -1150,0313 | 6,87666 | 0,96788 | ** | 0 | □ | □ | □ | □ | hypothetical protein                                     | NA         | NA                                                                           |
| Supercontig_1.56_MV<br>LG_04754_10sp  | -467,97701 | -467,97701 | 0       | 0       | NS | 0 | □ | □ | □ | □ | hypothetical protein                                     | PF00730.18 | HhH-GPD(HhH-GPD<br>superfamily base excision DNA<br>repair protein)          |
| Supercontig_1.22_MV<br>LG_02734_7sp   | -480,82103 | -480,82103 | 0       | 0       | NS | 0 | □ | □ | □ | □ | hypothetical protein                                     | NA         | NA                                                                           |
| Supercontig_1.6_MVL<br>G_01115_10sp   | -548,88034 | -548,88003 | 0,00062 | 0,00031 | NS | 0 | □ | □ | □ | □ | hypothetical protein                                     | NA         | NA                                                                           |
| Supercontig_1.1_MVL<br>G_00259_10sp   | -854,22955 | -854,22955 | 0       | 0       | NS | 0 | □ | □ | □ | □ | hypothetical protein                                     | NA         | NA                                                                           |
| Supercontig_1.41_MV<br>LG_04021_7sp   | -422,15913 | -422,15913 | 0       | 0       | NS | 0 | □ | □ | □ | □ | isopentenyl-<br>diphosphate Delta-<br>isomerase          | TIGR02150  | TIGR02150(IPP_isom_1:<br>isopentenyl-diphosphate delta-<br>isomerase)        |
| Supercontig_1.74_MV<br>LG_05470_9sp   | -618,70881 | -618,49655 | 0,42452 | 0,19125 | NS | 0 | □ | □ | □ | □ | imidazole glycerol<br>phosphate synthase<br>hisHF        | TIGR00735  | TIGR00735(hisF:<br>imidazoleglycerol phosphate<br>synthase, cyclase subunit) |
| Supercontig_1.10_MV<br>LG_01669_7sp   | -1129,4736 | -1128,7055 | 1,5362  | 0,53611 | NS | 0 | □ | □ | □ | □ | hypothetical protein                                     | NA         | NA                                                                           |
| Supercontig_1.12_MV<br>LG_01803_9sp   | -578,18914 | -578,18914 | 0       | 0       | NS | 0 | □ | □ | □ | □ | hypothetical protein                                     | PF02148.12 | zf-UBP(Zn-finger in ubiquitin-<br>hydrolases and other protein)              |
| Supercontig_1.14_MV<br>LG_01976_10sp  | -554,73738 | -554,7368  | 0,00116 | 0,00058 | NS | 0 | □ | □ | □ | □ | hypothetical protein                                     | PF07970.5  | COP1coated_ERV(Endoplasmic<br>reticulum vesicle transporter)                 |
| Supercontig_1.149_MV<br>LG_06761_10sp | -766,46735 | -766,36636 | 0,20198 | 0,09606 | NS | 0 | □ | □ | □ | □ | hypothetical protein                                     | NA         | NA                                                                           |
| Supercontig_1.36_MV<br>LG_03683_9sp   | -489,17276 | -488,92737 | 0,49078 | 0,2176  | NS | 0 | □ | □ | □ | □ | Ras-like protein                                         | PF08477.6  | Miro(Miro-like protein)                                                      |
| Supercontig_1.2_MVL<br>G_00450_10sp   | -432,13341 | -431,19437 | 1,87808 | 0,609   | NS | 0 | □ | □ | □ | □ | hypothetical protein                                     | PF04059.5  | RRM_2(RNA recognition motif 2)                                               |
| Supercontig_1.1_MVL<br>G_00272_10sp   | -516,52252 | -516,52252 | 0       | 0       | NS | 0 | □ | □ | □ | □ | potassium/sodium<br>efflux P-type ATPase,<br>fungal-type | TIGR01494  | TIGR01494(ATPase_P-type:<br>HAD ATPase, P-type, family IC)                   |
| Supercontig_1.30_MV<br>LG_03320_10sp  | -395,77011 | -395,77011 | 0       | 0       | NS | 0 | □ | □ | □ | □ | hypothetical protein                                     | PF04908.8  | SH3BGR(SH3-binding, glutamic<br>acid-rich protein)                           |
| Supercontig_1.99_MV<br>LG_06124_7sp   | -759,43039 | -759,43039 | 0       | 0       | NS | 0 | □ | □ | □ | □ | kynureninase                                             | TIGR01814  | TIGR01814(kynureninase:<br>kynureninase)                                     |
| Supercontig_1.585_MV<br>LG_07284_9sp  | -395,88427 | -394,91813 | 1,93228 | 0,61945 | NS | 0 | □ | □ | □ | □ | hypothetical protein                                     | PF03583.7  | LIP(Secretory lipase)                                                        |



|                                      |            |            |         |         |    |   |   |   |   |   |   |   |   |   |                                     |            |                                                                            |
|--------------------------------------|------------|------------|---------|---------|----|---|---|---|---|---|---|---|---|---|-------------------------------------|------------|----------------------------------------------------------------------------|
| Supercontig_1.44_MV<br>LG_04162_9sp  | -517,71409 | -517,71409 | 0       | 0       | NS | 0 | 0 | 0 | 0 | 0 | 0 | 0 | 0 | 0 | hypothetical protein                | NA         | NA                                                                         |
| Supercontig_1.40_MV<br>LG_03937_6sp  | -1083,9992 | -1083,999  | 0,00036 | 0,00018 | NS | 0 | 0 | 0 | 0 | 0 | 0 | 0 | 0 | 0 | hypothetical protein                | NA         | NA                                                                         |
| Supercontig_1.62_MV<br>LG_05003_9sp  | -827,72302 | -825,95484 | 3,53636 | 0,82936 | NS | 0 | 0 | 0 | 0 | 0 | 0 | 0 | 0 | 0 | hypothetical protein                | PF00172.11 | Zn_clus(Fungal Zn(2)-Cys(6)<br>binuclear cluster domain)                   |
| Supercontig_1.20_MV<br>LG_02544_10sp | -408,39878 | -407,70553 | 1,3865  | 0,50005 | NS | 0 | 0 | 0 | 0 | 0 | 0 | 0 | 0 | 0 | hypothetical protein                | PF00076.15 | RRM_1(RNA recognition motif.<br>(a.k.a. RRM, RBD, or RNP<br>domain))       |
| Supercontig_1.5_MVL<br>G_00972_9sp   | -608,99115 | -608,87857 | 0,22516 | 0,10647 | NS | 0 | 0 | 0 | 0 | 0 | 0 | 0 | 0 | 0 | hypothetical protein                | PF08241.5  | Methyltransf_11(Methyltransferase<br>domain)                               |
| Supercontig_1.14_MV<br>LG_01997_11sp | -585,18535 | -585,18535 | 0       | 0       | NS | 0 | 0 | 0 | 0 | 0 | 0 | 0 | 0 | 0 | alcohol<br>dehydrogenase<br>(NADP+) | PF00248.14 | Aldo_ket_red(Aldo/keto<br>reductase family)                                |
| Supercontig_1.91_MV<br>LG_05924_9sp  | -409,06169 | -408,1101  | 1,90318 | 0,61387 | NS | 0 | 0 | 0 | 0 | 0 | 0 | 0 | 0 | 0 | hypothetical protein                | NA         | NA                                                                         |
| Supercontig_1.164_MV<br>LG_06895_8sp | -589,18606 | -589,18606 | 0       | 0       | NS | 0 | 0 | 0 | 0 | 0 | 0 | 0 | 0 | 0 | vacuolar protein 8                  | PF05804.5  | KAP(Kinesin-associated protein<br>(KAP))                                   |
| Supercontig_1.19_MV<br>LG_02433_8sp  | -334,92664 | -334,45103 | 0,95122 | 0,37849 | NS | 0 | 0 | 0 | 0 | 0 | 0 | 0 | 0 | 0 | hypothetical protein                | PF06978.4  | POP1(Ribonucleases P/MRP<br>protein subunit POP1)                          |
| Supercontig_1.20_MV<br>LG_02549_11sp | -335,44383 | -335,44383 | 0       | 0       | NS | 0 | 0 | 0 | 0 | 0 | 0 | 0 | 0 | 0 | hypothetical protein                | TIGR00535  | TIGR00535(SAM_DCcase: S-<br>adenosylmethionine<br>decarboxylase proenzyme) |
| Supercontig_1.14_MV<br>LG_01994_10sp | -715,33406 | -715,33406 | 0       | 0       | NS | 0 | 0 | 0 | 0 | 0 | 0 | 0 | 0 | 0 | histone deacetylase<br>phd1         | PF00850.12 | Hist_deacetyl(Histone<br>deacetylase domain)                               |
| Supercontig_1.1_MVL<br>G_00035_6sp   | -324,86189 | -324,86184 | 0,0001  | 0       | NS | 0 | 0 | 0 | 0 | 0 | 0 | 0 | 0 | 0 | hypothetical protein                | PF08991.3  | DUF1903(Domain of unknown<br>function (DUF1903))                           |
| Supercontig_1.18_MV<br>LG_02378_6sp  | -834,48384 | -834,4838  | 0       | 0       | NS | 0 | 0 | 0 | 0 | 0 | 0 | 0 | 0 | 0 | hypothetical protein                | PF04410.7  | Gar1(Gar1/Naf1 RNA binding<br>region)                                      |
| Supercontig_1.10_MV<br>LG_01602_7sp  | -677,88675 | -677,88626 | 0,00098 | 0,00049 | NS | 0 | 0 | 0 | 0 | 0 | 0 | 0 | 0 | 0 | CK1/CK1/CK1-G<br>protein kinase     | PF07714.10 | Pkinase_Tyr(Protein tyrosine<br>kinase)                                    |
| Supercontig_1.123_MV<br>LG_06476_9sp | -636,82357 | -636,82357 | 0       | 0       | NS | 0 | 0 | 0 | 0 | 0 | 0 | 0 | 0 | 0 | hypothetical protein                | PF11968.1  | DUF3321(Protein of unknown<br>function (DUF3321))                          |
| Supercontig_1.9_MVL<br>G_01560_8sp   | -1606,0703 | -1606,0703 | 0       | 0       | NS | 0 | 0 | 0 | 0 | 0 | 0 | 0 | 0 | 0 | hypothetical protein                | PF02383.11 | Syja_N(SacI homology domain)                                               |
| Supercontig_1.39_MV<br>LG_03844_9sp  | -1143,6695 | -1143,5984 | 0,14224 | 0,06865 | NS | 0 | 0 | 0 | 0 | 0 | 0 | 0 | 0 | 0 | hypothetical protein                | PF08553.3  | VID27(VID27 cytoplasmic<br>protein)                                        |
| Supercontig_1.4_MVL<br>G_00775_6sp   | -766,79447 | -766,79447 | 0       | 0       | NS | 0 | 0 | 0 | 0 | 0 | 0 | 0 | 0 | 0 | hypothetical protein                | PF02421.11 | FeoB_N(Ferrous iron transport<br>protein B)                                |
| Supercontig_1.92_MV<br>LG_05956_6sp  | -672,41457 | -671,29768 | 2,23378 | 0,6727  | NS | 0 | 0 | 0 | 0 | 0 | 0 | 0 | 0 | 0 | hypothetical protein                | NA         | NA                                                                         |
| Supercontig_1.75_MV<br>LG_05491_8sp  | -610,16764 | -610,10317 | 0,12894 | 0,06244 | NS | 0 | 0 | 0 | 0 | 0 | 0 | 0 | 0 | 0 | hypothetical protein                | NA         | NA                                                                         |
| Supercontig_1.59_MV<br>LG_04903_10sp | -571,36971 | -571,17168 | 0,39606 | 0,17965 | NS | 0 | 0 | 0 | 0 | 0 | 0 | 0 | 0 | 0 | hypothetical protein                | PF01000.19 | RNA_pol_A_bac(RNA<br>polymerase Rpb3/RpoA insert<br>domain)                |
| Supercontig_1.27_MV<br>LG_03098_9sp  | -393,60405 | -393,06163 | 1,08484 | 0,41866 | NS | 0 | 0 | 0 | 0 | 0 | 0 | 0 | 0 | 0 | hypothetical protein                | PF07690.9  | MFS_1(Major Facilitator<br>Superfamily)                                    |
| Supercontig_1.47_MV<br>LG_04330_10sp | -576,54083 | -576,54083 | 0       | 0       | NS | 0 | 0 | 0 | 0 | 0 | 0 | 0 | 0 | 0 | hypothetical protein                | PF07716.8  | bZIP_2(Basic region leucine<br>zipper)                                     |
| Supercontig_1.48_MV<br>LG_04356_11sp | -542,7231  | -542,45752 | 0,53116 | 0,23324 | NS | 0 | 0 | 0 | 0 | 0 | 0 | 0 | 0 | 0 | hypothetical protein                | PF05739.12 | SNARE(SNARE domain)                                                        |

|                                      |            |            |         |         |    |   |  |  |  |                              |            |                                                                               |
|--------------------------------------|------------|------------|---------|---------|----|---|--|--|--|------------------------------|------------|-------------------------------------------------------------------------------|
| Supercontig_1.3_MVL<br>G_00515_9sp   | -688,32918 | -688,32918 | 0       | 0       | NS | 0 |  |  |  | hypothetical protein         | PF11735.1  | CAP59_mtransfer(Cryptococcal<br>mannosyltransferase 1)                        |
| Supercontig_1.84_MV<br>LG_05782_6sp  | -1397,0633 | -1397,0633 | 0       | 0       | NS | 0 |  |  |  | hypothetical protein         | PF06159.6  | DUF974(Protein of unknown<br>function (DUF974))                               |
| Supercontig_1.6_MVL<br>G_01107_10sp  | -463,70897 | -463,70897 | 0       | 0       | NS | 0 |  |  |  | hypothetical protein         | PF00857.13 | Isochorismatase(Isochorismatas<br>e family)                                   |
| Supercontig_1.51_MV<br>LG_04497_10sp | -1270,2542 | -1270,1972 | 0,1139  | 0,05536 | NS | 0 |  |  |  | hypothetical protein         | PF00150.11 | Cellulase(Cellulase (glycosyl<br>hydrolase family 5))                         |
| Supercontig_1.94_MV<br>LG_06001_10sp | -1028,9622 | -1028,9622 | 0       | 0       | NS | 0 |  |  |  | hypothetical protein         | PF01852.12 | START(START domain)                                                           |
| Supercontig_1.202_MV<br>LG_07089_9sp | -258,22644 | -258,22613 | 0,00062 | 0,00031 | NS | 0 |  |  |  | 40S ribosomal protein<br>S27 | PF01667.10 | Ribosomal_S27e(Ribosomal<br>protein S27)                                      |
| Supercontig_1.18_MV<br>LG_02374_9sp  | -626,80626 | -626,80626 | 0       | 0       | NS | 0 |  |  |  | hypothetical protein         | NA         | NA                                                                            |
| Supercontig_1.6_MVL<br>G_01215_10sp  | -419,8589  | -419,00803 | 1,70174 | 0,57296 | NS | 0 |  |  |  | hypothetical protein         | NA         | NA                                                                            |
| Supercontig_1.14_MV<br>LG_02023_8sp  | -1022,2693 | -1019,4018 | 5,73502 | 0,94316 | *  | 0 |  |  |  | hypothetical protein         | PF08528.4  | Whi5(Whi5 like)                                                               |
| Supercontig_1.97_MV<br>LG_06072_10sp | -675,18475 | -675,18471 | 0       | 0       | NS | 0 |  |  |  | hypothetical protein         | NA         | NA                                                                            |
| Supercontig_1.3_MVL<br>G_00645_10sp  | -909,72636 | -909,38128 | 0,69016 | 0,29184 | NS | 0 |  |  |  | hypothetical protein         | PF00293.21 | NUDIX(NUDIX domain)                                                           |
| Supercontig_1.24_MV<br>LG_02863_10sp | -474,912   | -474,912   | 0       | 0       | NS | 0 |  |  |  | hypothetical protein         | PF07724.7  | AAA_2(AAA domain (Cdc48<br>subfamily))                                        |
| Supercontig_1.9_MVL<br>G_01532_8sp   | -640,04782 | -640,04757 | 0,0005  | 0,00025 | NS | 0 |  |  |  | hypothetical protein         | NA         | NA                                                                            |
| Supercontig_1.9_MVL<br>G_01576_9sp   | -612,55808 | -612,55808 | 0       | 0       | NS | 0 |  |  |  | hypothetical protein         | NA         | NA                                                                            |
| Supercontig_1.99_MV<br>LG_06113_11sp | -692,22126 | -692,22126 | 0       | 0       | NS | 0 |  |  |  | hypothetical protein         | PF00400.25 | WD40(WD domain, G-beta<br>repeat)                                             |
| Supercontig_1.132_MV<br>LG_06604_8sp | -416,5127  | -416,5127  | 0       | 0       | NS | 0 |  |  |  | hypothetical protein         | TIGR00149  | TIGR00149(TIGR00149_YbjQ:<br>secondary thiamine-phosphate<br>synthase enzyme) |
| Supercontig_1.105_MV<br>LG_06221_8sp | -484,19149 | -483,17142 | 2,04014 | 0,63943 | NS | 0 |  |  |  | hypothetical protein         | NA         | NA                                                                            |
| Supercontig_1.53_MV<br>LG_04621_8sp  | -724,09353 | -724,09333 | 0,0004  | 0,0002  | NS | 0 |  |  |  | hypothetical protein         | PF00615.12 | RGS(Regulator of G protein<br>signaling domain)                               |
| Supercontig_1.20_MV<br>LG_02577_8sp  | -346,31403 | -346,31403 | 0       | 0       | NS | 0 |  |  |  | beta-lactamase               | PF00144.17 | Beta-lactamase(Beta-lactamase)                                                |
| Supercontig_1.55_MV<br>LG_04725_10sp | -829,62141 | -829,62141 | 0       | 0       | NS | 0 |  |  |  | hypothetical protein         | PF03259.10 | Robl_LC7(Roadblock/LC7<br>domain)                                             |
| Supercontig_1.49_MV<br>LG_04412_8sp  | -596,4975  | -596,4975  | 0       | 0       | NS | 0 |  |  |  | hypothetical protein         | NA         | NA                                                                            |
| Supercontig_1.74_MV<br>LG_05455_9sp  | -330,68854 | -330,67043 | 0,03622 | 0,01795 | NS | 0 |  |  |  | hypothetical protein         | PF01920.13 | Prefoldin_2(Prefoldin subunit)                                                |
| Supercontig_1.30_MV<br>LG_03303_7sp  | -521,42976 | -521,37538 | 0,10876 | 0,05293 | NS | 0 |  |  |  | beta-lactamase               | PF00144.17 | Beta-lactamase(Beta-lactamase)                                                |
| Supercontig_1.45_MV<br>LG_04230_9sp  | -1377,4634 | -1376,4121 | 2,1025  | 0,6505  | NS | 0 |  |  |  | hypothetical protein         | NA         | NA                                                                            |
| Supercontig_1.3_MVL<br>G_00578_9sp   | -569,69798 | -569,69798 | 0       | 0       | NS | 0 |  |  |  | hypothetical protein         | NA         | NA                                                                            |

|                                       |            |            |         |         |    |   |   |   |   |   |                                                 |            |                                                                           |
|---------------------------------------|------------|------------|---------|---------|----|---|---|---|---|---|-------------------------------------------------|------------|---------------------------------------------------------------------------|
| Supercontig_1.96_MV<br>LG_06040_11sp  | -616,32723 | -614,80991 | 3,03464 | 0,7807  | NS | 0 | □ | □ | □ | □ | hypothetical protein                            | NA         | NA                                                                        |
| Supercontig_1.23_MV<br>LG_02766_9sp   | -540,74708 | -540,74708 | 0       | 0       | NS | 0 | □ | □ | □ | □ | hypothetical protein                            | PF01425.14 | Amidase(Amidase)                                                          |
| Supercontig_1.4_MVL<br>G_00852_11sp   | -424,83144 | -424,83128 | 0,00032 | 0,00016 | NS | 0 | □ | □ | □ | □ | ABC1-C atypical<br>protein kinase               | PF03109.9  | ABC1(ABC1 family)                                                         |
| Supercontig_1.62_MV<br>LG_05027_9sp   | -1018,4908 | -1018,4907 | 0       | 0       | NS | 0 | □ | □ | □ | □ | hypothetical protein                            | NA         | NA                                                                        |
| Supercontig_1.186_MV<br>LG_07031_10sp | -364,91635 | -364,91601 | 0,00068 | 0,00034 | NS | 0 | □ | □ | □ | □ | serine/threonine-<br>protein phosphatase<br>PP1 | PF00149.21 | Metallophos(Calcineurin-like<br>phosphoesterase)                          |
| Supercontig_1.2_MVL<br>G_00316_8sp    | -383,36509 | -383,36509 | 0       | 0       | NS | 0 | □ | □ | □ | □ | hypothetical protein                            | NA         | NA                                                                        |
| Supercontig_1.7_MVL<br>G_01225_9sp    | -606,48593 | -606,48593 | 0       | 0       | NS | 0 | □ | □ | □ | □ | hypothetical protein                            | PF09335.4  | SNARE_assoc(SNARE<br>associated Golgi protein)                            |
| Supercontig_1.54_MV<br>LG_04662_8sp   | -339,02846 | -339,02846 | 0       | 0       | NS | 0 | □ | □ | □ | □ | hypothetical protein                            | TIGR02970  | (succ_dehyd_cytB:<br>succinate dehydrogenase,<br>cytochrome b556 subunit) |
| Supercontig_1.8_MVL<br>G_01402_11sp   | -417,95321 | -417,95321 | 0       | 0       | NS | 0 | □ | □ | □ | □ | hypothetical protein                            | PF00240.16 | ubiquitin(Ubiquitin family)                                               |
| Supercontig_1.5_MVL<br>G_00928_8sp    | -373,94475 | -373,94473 | 0       | 0       | NS | 0 | □ | □ | □ | □ | hypothetical protein                            | PF00170.14 | bZIP_1(bZIP transcription factor)                                         |
| Supercontig_1.48_MV<br>LG_04377_10sp  | -292,68907 | -292,68891 | 0,00032 | 0,00016 | NS | 0 | □ | □ | □ | □ | hypothetical protein                            | PF00205.15 | TPP_enzyme_M(Thiamine<br>pyrophosphate enzyme, central<br>domain)         |
| Supercontig_1.16_MV<br>LG_02204_8sp   | -1086,5592 | -1084,9092 | 3,30002 | 0,80795 | NS | 0 | □ | □ | □ | □ | hypothetical protein                            | NA         | NA                                                                        |
| Supercontig_1.26_MV<br>LG_02988_11sp  | -394,1142  | -394,11424 | 0       | 0       | NS | 0 | □ | □ | □ | □ | hypothetical protein                            | PF01769.9  | MgtE(Divalent cation transporter)                                         |
| Supercontig_1.20_MV<br>LG_02530_9sp   | -448,97601 | -446,62147 | 4,70908 | 0,90506 | *  | 0 | □ | □ | □ | □ | hypothetical protein                            | NA         | NA                                                                        |
| Supercontig_1.4_MVL<br>G_00806_7sp    | -314,12603 | -314,12593 | 0,0002  | 0       | NS | 0 | □ | □ | □ | □ | hypothetical protein                            | PF08583.3  | Cmc1(Cytochrome c oxidase<br>biogenesis protein Cmc1 like)                |
| Supercontig_1.1164_M<br>VLG_07354_6sp | -632,78882 | -632,78849 | 0,00066 | 0,00033 | NS | 0 | □ | □ | □ | □ | hypothetical protein                            | NA         | NA                                                                        |
| Supercontig_1.2_MVL<br>G_00382_10sp   | -577,38585 | -577,37535 | 0,021   | 0,01045 | NS | 0 | □ | □ | □ | □ | hypothetical protein                            | PF08022.5  | FAD_binding_8(FAD-binding<br>domain)                                      |
| Supercontig_1.61_MV<br>LG_04977_10sp  | -786,6151  | -786,61439 | 0,00142 | 0,00071 | NS | 0 | □ | □ | □ | □ | hypothetical protein                            | PF01490.11 | Aa_trans(Transmembrane amino<br>acid transporter protein)                 |
| Supercontig_1.11_MV<br>LG_01714_10sp  | -668,28628 | -668,28628 | 0       | 0       | NS | 0 | □ | □ | □ | □ | hypothetical protein                            | NA         | NA                                                                        |
| Supercontig_1.78_MV<br>LG_05583_12sp  | -463,50139 | -462,71281 | 1,57716 | 0,54551 | NS | 0 | □ | □ | □ | □ | hypothetical protein                            | PF00494.12 | SQS_PSY(Squalene/phytoene<br>synthase)                                    |
| Supercontig_1.14_MV<br>LG_01987_7sp   | -650,70957 | -650,70957 | 0       | 0       | NS | 0 | □ | □ | □ | □ | hypothetical protein                            | PF02862.10 | DDHD(DDHD domain)                                                         |
| Supercontig_1.46_MV<br>LG_04257_11sp  | -485,66025 | -485,66025 | 0       | 0       | NS | 0 | □ | □ | □ | □ | hypothetical protein                            | PF08508.3  | DUF1746(Fungal domain of<br>unknown function (DUF1746))                   |
| Supercontig_1.57_MV<br>LG_04825_10sp  | -497,65623 | -497,65623 | 0       | 0       | NS | 0 | □ | □ | □ | □ | hypothetical protein                            | PF00443.22 | UCH(Ubiquitin carboxyl-terminal<br>hydrolase)                             |

|                                      |            |            |         |         |    |   |  |  |  |                                   |            |                                                                                |
|--------------------------------------|------------|------------|---------|---------|----|---|--|--|--|-----------------------------------|------------|--------------------------------------------------------------------------------|
| Supercontig_1.5_MVL<br>G_00908_9sp   | -943,66925 | -943,66925 | 0       | 0       | NS | 0 |  |  |  | hypothetical protein              | PF00022.12 | Actin(Actin)                                                                   |
| Supercontig_1.30_MV<br>LG_03262_10sp | -434,19532 | -434,19532 | 0       | 0       | NS | 0 |  |  |  | AP-2 complex subunit<br>sigma     | PF01217.13 | Clat_adaptor_s(Clathrin adaptor<br>complex small chain)                        |
| Supercontig_1.9_MVL<br>G_01521_10sp  | -778,83607 | -778,83607 | 0       | 0       | NS | 0 |  |  |  | CAMK/CAMKL/AMPK<br>protein kinase | PF07714.10 | Pkinase_Tyr(Protein tyrosine<br>kinase)                                        |
| Supercontig_1.73_MV<br>LG_05423_10sp | -501,97815 | -501,97815 | 0       | 0       | NS | 0 |  |  |  | hypothetical protein              | PF00013.22 | KH_1(KH domain)                                                                |
| Supercontig_1.4_MVL<br>G_00782_7sp   | -295,06521 | -295,06521 | 0       | 0       | NS | 0 |  |  |  | hypothetical protein              | PF03587.7  | EMG1(EMG1/NEP1<br>methyltransferase)                                           |
| Supercontig_1.65_MV<br>LG_05139_7sp  | -1212,5682 | -1212,4703 | 0,19578 | 0,09325 | NS | 0 |  |  |  | hypothetical protein              | PF07722.6  | Peptidase_C26(Peptidase C26)                                                   |
| Supercontig_1.19_MV<br>LG_02482_11sp | -1272,3414 | -1270,9053 | 2,87226 | 0,76215 | NS | 0 |  |  |  | hypothetical protein              | NA         | NA                                                                             |
| Supercontig_1.3_MVL<br>G_00629_6sp   | -955,22573 | -953,91144 | 2,62858 | 0,73133 | NS | 0 |  |  |  | hypothetical protein              | PF02628.8  | COX15-CtaA(Cytochrome<br>oxidase assembly protein)                             |
| Supercontig_1.51_MV<br>LG_04516_8sp  | -1039,9416 | -1039,9416 | 0       | 0       | NS | 0 |  |  |  | hypothetical protein              | PF01490.11 | Aa_trans(Transmembrane amino<br>acid transporter protein)                      |
| Supercontig_1.36_MV<br>LG_03692_10sp | -720,5623  | -720,5623  | 0       | 0       | NS | 0 |  |  |  | hypothetical protein              | PF00732.12 | GMC_oxred_N(GMC<br>oxidoreductase)                                             |
| Supercontig_1.101_MV<br>LG_06159_7sp | -861,35103 | -861,35096 | 0,00014 | 0       | NS | 0 |  |  |  | hypothetical protein              | NA         | NA                                                                             |
| Supercontig_1.26_MV<br>LG_02990_8sp  | -437,66024 | -437,66024 | 0       | 0       | NS | 0 |  |  |  | hypothetical protein              | PF00076.15 | RRM_1(RNA recognition motif.<br>(a.k.a. RRM, RBD, or RNP<br>domain))           |
| Supercontig_1.31_MV<br>LG_03363_10sp | -766,98996 | -766,87775 | 0,22442 | 0,10614 | NS | 0 |  |  |  | hypothetical protein              | PF09810.2  | Morph_protein1(Defects in<br>morphology protein 1,<br>mitochondrial precursor) |
| Supercontig_1.34_MV<br>LG_03550_8sp  | -1067,0594 | -1067,0594 | 0       | 0       | NS | 0 |  |  |  | hypothetical protein              | PF00439.18 | Bromodomain(Bromodomain)                                                       |
| Supercontig_1.74_MV<br>LG_05444_10sp | -618,64998 | -618,64997 | 0       | 0       | NS | 0 |  |  |  | hypothetical protein              | PF00076.15 | RRM_1(RNA recognition motif.<br>(a.k.a. RRM, RBD, or RNP<br>domain))           |
| Supercontig_1.15_MV<br>LG_02061_8sp  | -745,53219 | -744,79744 | 1,4695  | 0,52037 | NS | 0 |  |  |  | hypothetical protein              | PF00069.18 | Pkinase(Protein kinase domain)                                                 |
| Supercontig_1.66_MV<br>LG_05168_10sp | -616,00818 | -616,00789 | 0,00058 | 0,00029 | NS | 0 |  |  |  | hypothetical protein              | PF05721.6  | PhyH(Phytanoyl-CoA<br>dioxygenase (PhyH))                                      |
| Supercontig_1.7_MVL<br>G_01315_8sp   | -564,38061 | -562,94731 | 2,8666  | 0,76148 | NS | 0 |  |  |  | hypothetical protein              | PF06911.5  | Senescence(Senescence-<br>associated protein)                                  |
| Supercontig_1.16_MV<br>LG_02169_12sp | -1025,8317 | -1025,8317 | 0       | 0       | NS | 0 |  |  |  | hypothetical protein              | NA         | NA                                                                             |
| Supercontig_1.27_MV<br>LG_03103_8sp  | -720,4413  | -720,44094 | 0,00072 | 0,00036 | NS | 0 |  |  |  | hypothetical protein              | PF00642.17 | zf-CCCH(Zinc finger C-x8-C-x5-<br>C-x3-H type (and similar))                   |
| Supercontig_1.84_MV<br>LG_05768_11sp | -454,90196 | -454,70222 | 0,39948 | 0,18106 | NS | 0 |  |  |  | hypothetical protein              | NA         | NA                                                                             |
| Supercontig_1.9_MVL<br>G_01547_8sp   | -831,52807 | -831,52791 | 0,00032 | 0,00016 | NS | 0 |  |  |  | hypothetical protein              | PF00501.21 | AMP-binding(AMP-binding<br>enzyme)                                             |
| Supercontig_1.94_MV<br>LG_06004_9sp  | -352,04079 | -352,04079 | 0       | 0       | NS | 0 |  |  |  | Ras-like protein Rab-<br>7a       | PF04670.5  | Gtr1_RagA(Gtr1/RagA G protein<br>conserved region)                             |
| Supercontig_1.70_MV<br>LG_05325_8sp  | -1803,8355 | -1803,8355 | 0       | 0       | NS | 0 |  |  |  | hypothetical protein              | NA         | NA                                                                             |

|                                      |            |            |         |         |    |   |   |   |   |   |                                                                      |            |                                                                                                 |
|--------------------------------------|------------|------------|---------|---------|----|---|---|---|---|---|----------------------------------------------------------------------|------------|-------------------------------------------------------------------------------------------------|
| Supercontig_1.61_MV<br>LG_04960_9sp  | -337,58332 | -337,58332 | 0       | 0       | NS | 0 | 0 | 0 | 0 | 0 | hypothetical protein                                                 | NA         | NA                                                                                              |
| Supercontig_1.18_MV<br>LG_02377_10sp | -1708,2123 | -1707,2809 | 1,8627  | 0,60598 | NS | 0 | 0 | 0 | 0 | 0 | hypothetical protein                                                 | NA         | NA                                                                                              |
| Supercontig_1.66_MV<br>LG_05189_11sp | -584,84877 | -582,66036 | 4,37682 | 0,88791 | NS | 0 | 0 | 0 | 0 | 0 | hypothetical protein                                                 | NA         | NA                                                                                              |
| Supercontig_1.49_MV<br>LG_04411_8sp  | -824,97086 | -824,81259 | 0,31654 | 0,14638 | NS | 0 | 0 | 0 | 0 | 0 | hypothetical protein                                                 | TIGR00560  | TIGR00560(pgsA: CDP-<br>diacylglycerol--glycerol-3-<br>phosphate 3-<br>phosphatidyltransferase) |
| Supercontig_1.16_MV<br>LG_02211_7sp  | -758,39729 | -758,39729 | 0       | 0       | NS | 0 | 0 | 0 | 0 | 0 | hypothetical protein                                                 | NA         | NA                                                                                              |
| Supercontig_1.7_MVL<br>G_01349_8sp   | -954,87292 | -954,87292 | 0       | 0       | NS | 0 | 0 | 0 | 0 | 0 | hypothetical protein                                                 | PF00635.19 | Motile_Sperm(MSP (Major<br>sperm protein) domain)                                               |
| Supercontig_1.67_MV<br>LG_05222_9sp  | -406,49237 | -406,49237 | 0       | 0       | NS | 0 | 0 | 0 | 0 | 0 | ubiquitin-conjugating<br>enzyme E2 G1                                | PF00179.19 | UQ_con(Ubiquitin-conjugating<br>enzyme)                                                         |
| Supercontig_1.47_MV<br>LG_04342_10sp | -1102,302  | -1102,302  | 0       | 0       | NS | 0 | 0 | 0 | 0 | 0 | Peroxisomal targeting<br>signal (PTS1) receptor<br>protein peroxin 5 | PF00515.21 | TPR_1(Tetratricopeptide repeat)                                                                 |
| Supercontig_1.39_MV<br>LG_03839_8sp  | -686,83102 | -686,83064 | 0,00076 | 0,00038 | NS | 0 | 0 | 0 | 0 | 0 | hypothetical protein                                                 | NA         | NA                                                                                              |
| Supercontig_1.19_MV<br>LG_02432_7sp  | -406,03177 | -405,24433 | 1,57488 | 0,54499 | NS | 0 | 0 | 0 | 0 | 0 | hypothetical protein                                                 | NA         | NA                                                                                              |
| Supercontig_1.63_MV<br>LG_05090_8sp  | -456,47729 | -456,47729 | 0       | 0       | NS | 0 | 0 | 0 | 0 | 0 | hypothetical protein                                                 | NA         | NA                                                                                              |
| Supercontig_1.35_MV<br>LG_03598_9sp  | -330,66831 | -330,64963 | 0,03736 | 0,01851 | NS | 0 | 0 | 0 | 0 | 0 | hypothetical protein                                                 | TIGR00506  | TIGR00506(ribB: 3,4-dihydroxy-2-<br>butanone-4-phosphate synthase)                              |
| Supercontig_1.1_MVL<br>G_00043_10sp  | -361,47477 | -360,94138 | 1,06678 | 0,41339 | NS | 0 | 0 | 0 | 0 | 0 | hypothetical protein                                                 | PF00857.13 | Isochorismatase(Isochorismatas<br>e family)                                                     |
| Supercontig_1.8_MVL<br>G_01381_7sp   | -380,68715 | -380,53331 | 0,30768 | 0,14259 | NS | 0 | 0 | 0 | 0 | 0 | glycerol<br>dehydrogenase                                            | PF00248.14 | Aldo_ket_red(Aldo/keto<br>reductase family)                                                     |
| Supercontig_1.7_MVL<br>G_01328_10sp  | -420,50142 | -420,28861 | 0,42562 | 0,19169 | NS | 0 | 0 | 0 | 0 | 0 | hypothetical protein                                                 | PF07491.4  | PPL_Ypi1(Protein phosphatase<br>inhibitor)                                                      |
| Supercontig_1.15_MV<br>LG_02079_7sp  | -556,68116 | -556,63068 | 0,10096 | 0,04923 | NS | 0 | 0 | 0 | 0 | 0 | prefoldin                                                            | PF01920.13 | Prefoldin_2(Prefoldin subunit)                                                                  |
| Supercontig_1.5_MVL<br>G_00909_8sp   | -662,86427 | -661,91144 | 1,90566 | 0,61435 | NS | 0 | 0 | 0 | 0 | 0 | hypothetical protein                                                 | NA         | NA                                                                                              |
| Supercontig_1.8_MVL<br>G_01404_10sp  | -686,08042 | -686,08042 | 0       | 0       | NS | 0 | 0 | 0 | 0 | 0 | hypothetical protein                                                 | NA         | NA                                                                                              |
| Supercontig_1.39_MV<br>LG_03831_9sp  | -507,80806 | -507,80762 | 0,00088 | 0,00044 | NS | 0 | 0 | 0 | 0 | 0 | hypothetical protein                                                 | TIGR01509  | TIGR01509(HAD-SF-IA-v3: HAD<br>hydrolase, family IA, variant 3)                                 |
| Supercontig_1.6_MVL<br>G_01189_7sp   | -562,48496 | -560,75867 | 3,45258 | 0,82206 | NS | 0 | 0 | 0 | 0 | 0 | hypothetical protein                                                 | NA         | NA                                                                                              |
| Supercontig_1.10_MV<br>LG_01616_10sp | -580,77618 | -580,77618 | 0       | 0       | NS | 0 | 0 | 0 | 0 | 0 | hypothetical protein                                                 | PF12223.1  | DUF3602(Protein of unknown<br>function (DUF3602))                                               |
| Supercontig_1.52_MV<br>LG_04566_7sp  | -675,69215 | -675,62256 | 0,13918 | 0,06722 | NS | 0 | 0 | 0 | 0 | 0 | hypothetical protein                                                 | PF00775.14 | Dioxygenase_C(Dioxygenase)                                                                      |
| Supercontig_1.20_MV<br>LG_02538_10sp | -896,67053 | -895,91327 | 1,51452 | 0,53105 | NS | 0 | 0 | 0 | 0 | 0 | hypothetical protein                                                 | PF10419.2  | TFIIIC_subunit(TFIIIC subunit)                                                                  |

|                                       |            |            |         |         |    |   |  |  |  |  |  |                        |            |                                                                     |
|---------------------------------------|------------|------------|---------|---------|----|---|--|--|--|--|--|------------------------|------------|---------------------------------------------------------------------|
| Supercontig_1.20_MV<br>LG_02606_6sp   | -633,60899 | -633,60889 | 0,0002  | 0       | NS | 0 |  |  |  |  |  | hypothetical protein   | PF03348.8  | Serinc(Serine incorporator (Serinc))                                |
| Supercontig_1.6_MVL<br>G_01184_11sp   | -735,36678 | -735,36678 | 0       | 0       | NS | 0 |  |  |  |  |  | hypothetical protein   | TIGR00434  | TIGR00434(cysH: phosphoadenylyl-sulfate reductase)                  |
| Supercontig_1.5_MVL<br>G_00963_7sp    | -567,81888 | -567,04108 | 1,5556  | 0,54058 | NS | 0 |  |  |  |  |  | hypothetical protein   | PF02423.8  | OCD_Mu_crystal(Ornithine cyclodeaminase/mu-crystallin family)       |
| Supercontig_1.73_MV<br>LG_05412_9sp   | -1307,3681 | -1306,8053 | 1,1256  | 0,43039 | NS | 0 |  |  |  |  |  | hypothetical protein   | PF00855.10 | PWWP(PWWP domain)                                                   |
| Supercontig_1.3_MVL<br>G_00648_12sp   | -1034,0382 | -1030,0699 | 7,93672 | 0,9811  | ** | 0 |  |  |  |  |  | hypothetical protein   | PF02225.15 | PA(PA domain)                                                       |
| Supercontig_1.54_MV<br>LG_04652_7sp   | -779,96025 | -779,96025 | 0       | 0       | NS | 0 |  |  |  |  |  | hypothetical protein   | PF00172.11 | Zn_clus(Fungal Zn(2)-Cys(6) binuclear cluster domain)               |
| Supercontig_1.24_MV<br>LG_02871_10sp  | -417,0197  | -417,00975 | 0,0199  | 0,0099  | NS | 0 |  |  |  |  |  | hypothetical protein   | PF10193.2  | Telomere_reg-2(Telomere length regulation protein)                  |
| Supercontig_1.6_MVL<br>G_01211_9sp    | -410,14677 | -409,53963 | 1,21428 | 0,45509 | NS | 0 |  |  |  |  |  | hypothetical protein   | NA         | NA                                                                  |
| Supercontig_1.161_MV<br>LG_06870_8sp  | -484,36092 | -484,36073 | 0,00038 | 0,00019 | NS | 0 |  |  |  |  |  | malate dehydrogenase   | PF02866.11 | Ldh_1_C(lactate/malate dehydrogenase, alpha/beta C-terminal domain) |
| Supercontig_1.52_MV<br>LG_04587_9sp   | -486,73822 | -485,91455 | 1,64734 | 0,56118 | NS | 0 |  |  |  |  |  | hypothetical protein   | PF08636.3  | Pkr1(ER protein Pkr1)                                               |
| Supercontig_1.9_MVL<br>G_01561_8sp    | -494,05892 | -494,0589  | 0       | 0       | NS | 0 |  |  |  |  |  | hypothetical protein   | PF08227.4  | DASH_Hsk3(DASH complex subunit Hsk3 like)                           |
| Supercontig_1.59_MV<br>LG_04904_12sp  | -493,75054 | -493,7505  | 0       | 0       | NS | 0 |  |  |  |  |  | hypothetical protein   | PF08939.3  | DUF1917(Domain of unknown function (DUF1917))                       |
| Supercontig_1.1_MVL<br>G_00143_9sp    | -517,11901 | -516,54807 | 1,14188 | 0,43501 | NS | 0 |  |  |  |  |  | hypothetical protein   | NA         | NA                                                                  |
| Supercontig_1.4_MVL<br>G_00864_11sp   | -337,31264 | -337,31264 | 0       | 0       | NS | 0 |  |  |  |  |  | glutamine synthetase   | PF03951.12 | Gln-synt_N(Glutamine synthetase, beta-Grasp domain)                 |
| Supercontig_1.13_MV<br>LG_01968_8sp   | -530,85164 | -530,85164 | 0       | 0       | NS | 0 |  |  |  |  |  | rho-like protein rac1B | PF08477.6  | Miro(Miro-like protein)                                             |
| Supercontig_1.76_MV<br>LG_05538_10sp  | -427,91512 | -427,30142 | 1,2274  | 0,45866 | NS | 0 |  |  |  |  |  | hypothetical protein   | NA         | NA                                                                  |
| Supercontig_1.128_MV<br>LG_06553_11sp | -613,55024 | -613,55024 | 0       | 0       | NS | 0 |  |  |  |  |  | hypothetical protein   | PF11911.1  | DUF3429(Protein of unknown function (DUF3429))                      |
| Supercontig_1.42_MV<br>LG_04052_11sp  | -470,91262 | -470,91262 | 0       | 0       | NS | 0 |  |  |  |  |  | hypothetical protein   | PF00350.16 | Dynamain_N(Dynamain family)                                         |
| Supercontig_1.2_MVL<br>G_00319_11sp   | -484,21905 | -484,21905 | 0       | 0       | NS | 0 |  |  |  |  |  | hypothetical protein   | PF04072.7  | LCM(Lucine carboxyl methyltransferase)                              |
| Supercontig_1.170_MV<br>LG_06938_8sp  | -394,03299 | -394,03289 | 0,0002  | 0       | NS | 0 |  |  |  |  |  | hypothetical protein   | PF00282.12 | Pyridoxal_deC(Pyridoxal-dependent decarboxylase conserved domain)   |
| Supercontig_1.67_MV<br>LG_05234_6sp   | -1546,4261 | -1546,4261 | 0       | 0       | NS | 0 |  |  |  |  |  | hypothetical protein   | PF00664.16 | ABC_membrane(ABC transporter transmembrane region)                  |
| Supercontig_1.7_MVL<br>G_01267_11sp   | -606,99832 | -606,99826 | 0,00012 | 0       | NS | 0 |  |  |  |  |  | hypothetical protein   | PF01428.9  | zf-AN1(AN1-like Zinc finger)                                        |

|                                       |            |            |         |         |    |   |  |  |  |                                       |            |                                                                             |
|---------------------------------------|------------|------------|---------|---------|----|---|--|--|--|---------------------------------------|------------|-----------------------------------------------------------------------------|
| Supercontig_1.12_MV<br>LG_01841_12sp  | -735,28397 | -734,64532 | 1,2773  | 0,472   | NS | 0 |  |  |  | hypothetical protein                  | PF11701.1  | UNC45-central(Myosin-binding striated muscle assembly central)              |
| Supercontig_1.34_MV<br>LG_03547_8sp   | -317,81651 | -317,81644 | 0,00014 | 0       | NS | 0 |  |  |  | hypothetical protein                  | NA         | NA                                                                          |
| Supercontig_1.165_MV<br>LG_06907_7sp  | -461,28256 | -461,28248 | 0,00016 | 0       | NS | 0 |  |  |  | hypothetical protein                  | PF00012.13 | HSP70(Hsp70 protein)                                                        |
| Supercontig_1.11_MV<br>LG_01690_10sp  | -389,84965 | -389,84965 | 0       | 0       | NS | 0 |  |  |  | hypothetical protein                  | PF05730.4  | CFEM(CFEM domain)                                                           |
| Supercontig_1.121_MV<br>LG_06429_7sp  | -653,95118 | -653,95118 | 0       | 0       | NS | 0 |  |  |  | hypothetical protein                  | PF12090.1  | Spt20(Spt20 family)                                                         |
| Supercontig_1.25_MV<br>LG_02944_9sp   | -1285,3496 | -1285,3496 | 0       | 0       | NS | 0 |  |  |  | histidinol-phosphate aminotransferase | TIGR01141  | TIGR01141(hisC: histidinol-phosphate transaminase)                          |
| Supercontig_1.5_MVL<br>G_00991_7sp    | -557,54242 | -557,54242 | 0       | 0       | NS | 0 |  |  |  | hypothetical protein                  | PF01266.17 | DAO(FAD dependent oxidoreductase)                                           |
| Supercontig_1.3_MVL<br>G_00623_11sp   | -403,95104 | -403,86908 | 0,16392 | 0,07869 | NS | 0 |  |  |  | hypothetical protein                  | NA         | NA                                                                          |
| Supercontig_1.67_MV<br>LG_05229_6sp   | -824,99158 | -824,99158 | 0       | 0       | NS | 0 |  |  |  | inositol-3-phosphate synthase 1-B     | PF07994.5  | NAD_binding_5(Myo-inositol-1-phosphate synthase)                            |
| Supercontig_1.80_MV<br>LG_05639_11sp  | -382,30595 | -382,3058  | 0,0003  | 0,00015 | NS | 0 |  |  |  | hypothetical protein                  | PF02100.10 | ODC_AZ(Ornithine decarboxylase antizyme)                                    |
| Supercontig_1.55_MV<br>LG_04745_11sp  | -754,25771 | -754,25744 | 0,00054 | 0,00027 | NS | 0 |  |  |  | hypothetical protein                  | PF00565.10 | SNase(Staphylococcal nuclease homologue)                                    |
| Supercontig_1.3_MVL<br>G_00662_8sp    | -862,16949 | -862,16949 | 0       | 0       | NS | 0 |  |  |  | 40S ribosomal protein S1              | PF01015.11 | Ribosomal_S3Ae(Ribosomal S3Ae family)                                       |
| Supercontig_1.135_MV<br>LG_06635_10sp | -641,1359  | -641,13577 | 0,00026 | 0,00013 | NS | 0 |  |  |  | hypothetical protein                  | TIGR00081  | TIGR00081(purC: phosphoribosylaminoimidazolesuccinocarboxamide synthase)    |
| Supercontig_1.47_MV<br>LG_04313_6sp   | -559,53477 | -559,36992 | 0,3297  | 0,15198 | NS | 0 |  |  |  | hit family protein 1                  | PF11969.1  | DcpS_C(Scavenger mRNA decapping enzyme C-term binding)                      |
| Supercontig_1.56_MV<br>LG_04797_9sp   | -1087,4598 | -1087,4598 | 0       | 0       | NS | 0 |  |  |  | hypothetical protein                  | NA         | NA                                                                          |
| Supercontig_1.21_MV<br>LG_02620_10sp  | -494,05841 | -493,13506 | 1,8467  | 0,60281 | NS | 0 |  |  |  | hypothetical protein                  | PF00319.11 | SRF-TF(SRF-type transcription factor (DNA-binding and dimerisation domain)) |
| Supercontig_1.77_MV<br>LG_05546_10sp  | -805,81556 | -805,81537 | 0,00038 | 0,00019 | NS | 0 |  |  |  | hypothetical protein                  | PF10296.2  | DUF2404(Putative integral membrane protein conserved region (DUF2404))      |
| Supercontig_1.220_MV<br>LG_07159_7sp  | -419,07503 | -419,07466 | 0,00074 | 0,00037 | NS | 0 |  |  |  | hypothetical protein                  | NA         | NA                                                                          |
| Supercontig_1.7_MVL<br>G_01288_12sp   | -513,45286 | -512,48708 | 1,93156 | 0,61931 | NS | 0 |  |  |  | hypothetical protein                  | NA         | NA                                                                          |
| Supercontig_1.6_MVL<br>G_01169_12sp   | -315,80031 | -315,80028 | 0       | 0       | NS | 0 |  |  |  | hypothetical protein                  | PF00743.12 | FMO-like(Flavin-binding monooxygenase-like)                                 |
| Supercontig_1.5_MVL<br>G_00964_10sp   | -635,89965 | -635,89964 | 0       | 0       | NS | 0 |  |  |  | hypothetical protein                  | PF00320.20 | GATA(GATA zinc finger)                                                      |
| Supercontig_1.74_MV<br>LG_05460_10sp  | -292,61518 | -292,61514 | 0       | 0       | NS | 0 |  |  |  | hypothetical protein                  | PF08700.4  | Vps51(Vps51/Vps67)                                                          |

|                                       |            |            |         |         |    |   |  |  |  |  |                                             |            |                                                                        |
|---------------------------------------|------------|------------|---------|---------|----|---|--|--|--|--|---------------------------------------------|------------|------------------------------------------------------------------------|
| Supercontig_1.35_MV<br>LG_03600_9sp   | -516,63698 | -516,54567 | 0,18262 | 0,08727 | NS | 0 |  |  |  |  | hypothetical protein                        | PF00276.13 | Ribosomal_L23(Ribosomal protein L23)                                   |
| Supercontig_1.150_MV<br>LG_06769_10sp | -296,13136 | -296,13105 | 0,00062 | 0,00031 | NS | 0 |  |  |  |  | 20S proteasome subunit alpha 6              | PF00227.19 | Proteasome(Proteasome subunit)                                         |
| Supercontig_1.53_MV<br>LG_04612_8sp   | -374,54259 | -374,54259 | 0       | 0       | NS | 0 |  |  |  |  | hypothetical protein                        | PF00583.17 | Acetyltransf_1(Acetyltransferase (GNAT) family)                        |
| Supercontig_1.54_MV<br>LG_04650_11sp  | -397,2852  | -397,2852  | 0       | 0       | NS | 0 |  |  |  |  | glycerol-3-phosphate dehydrogenase [NAD+] 1 | TIGR03376  | TIGR03376(glycerol-3P_DH: glycerol-3-phosphate dehydrogenase (NAD(+))) |
| Supercontig_1.30_MV<br>LG_03287_8sp   | -462,91784 | -461,57022 | 2,69524 | 0,74014 | NS | 0 |  |  |  |  | hypothetical protein                        | PF05572.6  | Peptidase_M43(Pregnancy-associated plasma protein-A)                   |
| Supercontig_1.8_MVL<br>G_01426_10sp   | -1019,0864 | -1019,0859 | 0,00088 | 0,00044 | NS | 0 |  |  |  |  | prolyl-tRNA synthetase                      | PF00587.18 | tRNA-synt_2b(tRNA synthetase class II core domain (G, H, P, S and T))  |
| Supercontig_1.63_MV<br>LG_05071_9sp   | -638,22335 | -637,04383 | 2,35904 | 0,69257 | NS | 0 |  |  |  |  | hypothetical protein                        | PF01105.17 | EMP24_GP25L(emp24/gp25L/p24 family/GOLD)                               |
| Supercontig_1.31_MV<br>LG_03335_7sp   | -281,26781 | -281,26749 | 0,00064 | 0,00032 | NS | 0 |  |  |  |  | hypothetical protein                        | PF09495.3  | DUF2462(Protein of unknown function (DUF2462))                         |
| Supercontig_1.7_MVL<br>G_01354_12sp   | -532,21279 | -532,21276 | 0       | 0       | NS | 0 |  |  |  |  | hypothetical protein                        | PF03178.8  | CPSF_A(CPSF A subunit region)                                          |
| Supercontig_1.38_MV<br>LG_03817_12sp  | -350,15214 | -350,15214 | 0       | 0       | NS | 0 |  |  |  |  | hypothetical protein                        | NA         | NA                                                                     |
| Supercontig_1.23_MV<br>LG_02779_8sp   | -895,4829  | -895,48267 | 0,00046 | 0,00023 | NS | 0 |  |  |  |  | hypothetical protein                        | NA         | NA                                                                     |
| Supercontig_1.8_MVL<br>G_01472_7sp    | -1141,3415 | -1141,3415 | 0       | 0       | NS | 0 |  |  |  |  | hypothetical protein                        | PF10277.2  | Frag1(Frag1/DRAM/Sfk1 family)                                          |
| Supercontig_1.67_MV<br>LG_05210_11sp  | -866,50941 | -865,30923 | 2,40036 | 0,69886 | NS | 0 |  |  |  |  | hypothetical protein                        | NA         | NA                                                                     |
| Supercontig_1.104_MV<br>LG_06205_10sp | -960,52918 | -960,52918 | 0       | 0       | NS | 0 |  |  |  |  | hypothetical protein                        | PF00018.21 | SH3_1(SH3 domain)                                                      |
| Supercontig_1.10_MV<br>LG_01594_6sp   | -801,58219 | -801,58219 | 0       | 0       | NS | 0 |  |  |  |  | ATP synthase (E/31 kDa) subunit             | PF01991.11 | vATP-synt_E(ATP synthase (E/31 kDa) subunit)                           |
| Supercontig_1.76_MV<br>LG_05532_7sp   | -333,87286 | -333,87286 | 0       | 0       | NS | 0 |  |  |  |  | hypothetical protein                        | PF08982.4  | DUF1857(Domain of unknown function (DUF1857))                          |
| Supercontig_1.38_MV<br>LG_03781_11sp  | -604,43531 | -604,43531 | 0       | 0       | NS | 0 |  |  |  |  | hypothetical protein                        | NA         | NA                                                                     |
| Supercontig_1.66_MV<br>LG_05174_7sp   | -905,374   | -905,08395 | 0,5801  | 0,25177 | NS | 0 |  |  |  |  | hypothetical protein                        | NA         | NA                                                                     |
| Supercontig_1.32_MV<br>LG_03390_10sp  | -439,75849 | -439,75849 | 0       | 0       | NS | 0 |  |  |  |  | hypothetical protein                        | PF09542.3  | FFD_TFG(FFD and TFG box motifs)                                        |
| Supercontig_1.48_MV<br>LG_04373_9sp   | -470,48668 | -470,26864 | 0,43608 | 0,19591 | NS | 0 |  |  |  |  | aldehyde dehydrogenase (NAD+)               | PF00171.15 | Aldedh(Aldehyde dehydrogenase family)                                  |
| Supercontig_1.110_MV<br>LG_06293_8sp  | -483,98314 | -483,69854 | 0,5692  | 0,24768 | NS | 0 |  |  |  |  | hypothetical protein                        | NA         | NA                                                                     |
| Supercontig_1.79_MV<br>LG_05628_11sp  | -429,13567 | -429,13567 | 0       | 0       | NS | 0 |  |  |  |  | hypothetical protein                        | NA         | NA                                                                     |
| Supercontig_1.17_MV<br>LG_02346_8sp   | -319,95002 | -319,94998 | 0       | 0       | NS | 0 |  |  |  |  | hypothetical protein                        | NA         | NA                                                                     |



|                                      |            |            |         |         |    |   |   |   |   |   |                                       |            |                                                                         |
|--------------------------------------|------------|------------|---------|---------|----|---|---|---|---|---|---------------------------------------|------------|-------------------------------------------------------------------------|
| Supercontig_1.66_MV<br>LG_05179_7sp  | -561,06974 | -561,06973 | 0       | 0       | NS | 0 | 0 | 0 | 0 | 0 | hypothetical protein                  | TIGR00879  | TIGR00879(SP: MFS transporter, sugar porter (SP) family)                |
| Supercontig_1.12_MV<br>LG_01860_10sp | -733,71199 | -733,71199 | 0       | 0       | NS | 0 | 0 | 0 | 0 | 0 | hypothetical protein                  | PF04880.6  | NUDE_C(NUDE protein, C-terminal conserved region)                       |
| Supercontig_1.11_MV<br>LG_01702_10sp | -547,59004 | -547,59004 | 0       | 0       | NS | 0 | 0 | 0 | 0 | 0 | DNA replication licensing factor mcm7 | PF00493.16 | MCM(MCM2/3/5 family)                                                    |
| Supercontig_1.5_MVL<br>G_00883_11sp  | -424,38221 | -422,90991 | 2,9446  | 0,7706  | NS | 0 | 0 | 0 | 0 | 0 | hypothetical protein                  | NA         | NA                                                                      |
| Supercontig_1.53_MV<br>LG_04607_7sp  | -620,71292 | -620,71292 | 0       | 0       | NS | 0 | 0 | 0 | 0 | 0 | BUD32 protein kinase                  | PF00069.18 | Pkinase(Protein kinase domain)                                          |
| Supercontig_1.7_MVL<br>G_01342_8sp   | -442,84102 | -442,841   | 0       | 0       | NS | 0 | 0 | 0 | 0 | 0 | hypothetical protein                  | PF01126.13 | Heme_oxygenase(Heme oxygenase)                                          |
| Supercontig_1.1_MVL<br>G_00113_10sp  | -591,03701 | -590,85094 | 0,37214 | 0,16978 | NS | 0 | 0 | 0 | 0 | 0 | hypothetical protein                  | PF00046.22 | Homeobox(Homeobox domain)                                               |
| Supercontig_1.53_MV<br>LG_04638_11sp | -412,7453  | -411,94485 | 1,6009  | 0,55087 | NS | 0 | 0 | 0 | 0 | 0 | hypothetical protein                  | PF04248.5  | DUF427(Domain of unknown function (DUF427))                             |
| Supercontig_1.60_MV<br>LG_04949_10sp | -1157,1645 | -1156,9381 | 0,45274 | 0,20258 | NS | 0 | 0 | 0 | 0 | 0 | hypothetical protein                  | NA         | NA                                                                      |
| Supercontig_1.5_MVL<br>G_00948_10sp  | -323,94333 | -323,9432  | 0,00026 | 0,00013 | NS | 0 | 0 | 0 | 0 | 0 | hypothetical protein                  | PF07728.7  | AAA_5(AAA domain (dynein-related subfamily))                            |
| Supercontig_1.19_MV<br>LG_02438_9sp  | -887,01394 | -886,53207 | 0,96374 | 0,38237 | NS | 0 | 0 | 0 | 0 | 0 | hypothetical protein                  | PF01762.14 | Galactosyl_T(Galactosyltransferase)                                     |
| Supercontig_1.27_MV<br>LG_03079_10sp | -375,57267 | -375,55742 | 0,0305  | 0,01513 | NS | 0 | 0 | 0 | 0 | 0 | CMGC/MAPK protein kinase              | PF07714.10 | Pkinase_Tyr(Protein tyrosine kinase)                                    |
| Supercontig_1.59_MV<br>LG_04920_10sp | -320,62595 | -320,62588 | 0,00014 | 0       | NS | 0 | 0 | 0 | 0 | 0 | hypothetical protein                  | NA         | NA                                                                      |
| Supercontig_1.68_MV<br>LG_05252_10sp | -538,60903 | -538,60232 | 0,01342 | 0       | NS | 0 | 0 | 0 | 0 | 0 | hypothetical protein                  | PF07859.6  | Abhydrolase_3(alpha/beta hydrolase fold)                                |
| Supercontig_1.36_MV<br>LG_03673_9sp  | -556,4229  | -556,4222  | 0,0014  | 0       | NS | 0 | 0 | 0 | 0 | 0 | hypothetical protein                  | PF01433.13 | Peptidase_M1(Peptidase family M1)                                       |
| Supercontig_1.7_MVL<br>G_01320_8sp   | -481,28696 | -481,28688 | 0,00016 | 0       | NS | 0 | 0 | 0 | 0 | 0 | hypothetical protein                  | PF04667.10 | Endosulfine(cAMP-regulated phosphoprotein/endosulfine conserved region) |
| Supercontig_1.3_MVL<br>G_00548_7sp   | -354,35331 | -354,35306 | 0,0005  | 0,00025 | NS | 0 | 0 | 0 | 0 | 0 | small COPII coat GTPase               | PF04670.5  | Gtr1_RagA(Gtr1/RagA G protein conserved region)                         |
| Supercontig_1.75_MV<br>LG_05485_12sp | -555,28555 | -555,10635 | 0,3584  | 0,16406 | NS | 0 | 0 | 0 | 0 | 0 | hypothetical protein                  | PF09350.3  | DUF1992(Domain of unknown function (DUF1992))                           |
| Supercontig_1.1_MVL<br>G_00237_10sp  | -742,9016  | -742,9016  | 0       | 0       | NS | 0 | 0 | 0 | 0 | 0 | hypothetical protein                  | NA         | NA                                                                      |
| Supercontig_1.62_MV<br>LG_05028_8sp  | -464,99342 | -464,81686 | 0,35312 | 0,16185 | NS | 0 | 0 | 0 | 0 | 0 | hypothetical protein                  | PF04795.5  | PAPA-1(PAPA-1-like conserved region)                                    |
| Supercontig_1.38_MV<br>LG_03772_12sp | -457,17707 | -457,17707 | 0       | 0       | NS | 0 | 0 | 0 | 0 | 0 | hypothetical protein                  | PF04147.5  | Nop14(Nop14-like family)                                                |
| Supercontig_1.65_MV<br>LG_05134_10sp | -816,62513 | -816,60437 | 0,04152 | 0,02055 | NS | 0 | 0 | 0 | 0 | 0 | hypothetical protein                  | NA         | NA                                                                      |
| Supercontig_1.9_MVL<br>G_01494_11sp  | -1074,3595 | -1074,3595 | 0       | 0       | NS | 0 | 0 | 0 | 0 | 0 | hypothetical protein                  | NA         | NA                                                                      |
| Supercontig_1.3_MVL<br>G_00517_7sp   | -767,96141 | -767,10635 | 1,71012 | 0,57474 | NS | 0 | 0 | 0 | 0 | 0 | hypothetical protein                  | PF00400.25 | WD40(WD domain, G-beta repeat)                                          |

|                                       |            |            |         |         |    |   |   |   |   |   |   |   |   |   |   |   |   |   |   |   |                                   |            |                                                              |
|---------------------------------------|------------|------------|---------|---------|----|---|---|---|---|---|---|---|---|---|---|---|---|---|---|---|-----------------------------------|------------|--------------------------------------------------------------|
| Supercontig_1.26_MV<br>LG_03041_9sp   | -1265,6281 | -1265,6281 | 0       | 0       | NS | 0 | 0 | 0 | 0 | 0 | 0 | 0 | 0 | 0 | 0 | 0 | 0 | 0 | 0 | 0 | hypothetical protein              | PF07690.9  | MFS_1(Major Facilitator Superfamily)                         |
| Supercontig_1.101_MV<br>LG_06153_10sp | -456,13184 | -456,13184 | 0       | 0       | NS | 0 | 0 | 0 | 0 | 0 | 0 | 0 | 0 | 0 | 0 | 0 | 0 | 0 | 0 | 0 | hypothetical protein              | PF08696.4  | Dna2(DNA replication factor Dna2)                            |
| Supercontig_1.42_MV<br>LG_04053_9sp   | -605,90351 | -605,69543 | 0,41616 | 0,18786 | NS | 0 | 0 | 0 | 0 | 0 | 0 | 0 | 0 | 0 | 0 | 0 | 0 | 0 | 0 | 0 | hypothetical protein              | PF05008.8  | V-SNARE(Vesicle transport v-SNARE protein N-terminus)        |
| Supercontig_1.53_MV<br>LG_04604_7sp   | -1123,0655 | -1123,0655 | 0       | 0       | NS | 0 | 0 | 0 | 0 | 0 | 0 | 0 | 0 | 0 | 0 | 0 | 0 | 0 | 0 | 0 | hypothetical protein              | TIGR01241  | TIGR01241(FtsH_fam: ATP-dependent metalloproteinase HflB)    |
| Supercontig_1.10_MV<br>LG_01597_7sp   | -1151,0602 | -1151,0602 | 0       | 0       | NS | 0 | 0 | 0 | 0 | 0 | 0 | 0 | 0 | 0 | 0 | 0 | 0 | 0 | 0 | 0 | hypothetical protein              | PF06772.4  | LtrA(Bacterial low temperature requirement A protein (LtrA)) |
| Supercontig_1.5_MVL<br>G_01036_10sp   | -507,46443 | -507,46443 | 0       | 0       | NS | 0 | 0 | 0 | 0 | 0 | 0 | 0 | 0 | 0 | 0 | 0 | 0 | 0 | 0 | 0 | hypothetical protein              | PF00092.21 | VWA(von Willebrand factor type A domain)                     |
| Supercontig_1.6_MVL<br>G_01112_8sp    | -846,10489 | -845,79475 | 0,62028 | 0,26666 | NS | 0 | 0 | 0 | 0 | 0 | 0 | 0 | 0 | 0 | 0 | 0 | 0 | 0 | 0 | 0 | hypothetical protein              | PF00106.18 | adh_short(short chain dehydrogenase)                         |
| Supercontig_1.808_MV<br>LG_07315_10sp | -377,96137 | -378,58416 | 0       | 0       | NS | 0 | 0 | 0 | 0 | 0 | 0 | 0 | 0 | 0 | 0 | 0 | 0 | 0 | 0 | 0 | hypothetical protein              | PF01636.16 | APH(Phosphotransferase enzyme family)                        |
| Supercontig_1.77_MV<br>LG_05560_6sp   | -1664,4679 | -1664,4679 | 0       | 0       | NS | 0 | 0 | 0 | 0 | 0 | 0 | 0 | 0 | 0 | 0 | 0 | 0 | 0 | 0 | 0 | E3 ubiquitin-protein ligase NEDD4 | PF00632.18 | HECT(HECT-domain (ubiquitin-transferase))                    |
| Supercontig_1.10_MV<br>LG_01670_7sp   | -818,61033 | -818,61033 | 0       | 0       | NS | 0 | 0 | 0 | 0 | 0 | 0 | 0 | 0 | 0 | 0 | 0 | 0 | 0 | 0 | 0 | hypothetical protein              | NA         | NA                                                           |
| Supercontig_1.36_MV<br>LG_03696_8sp   | -651,69697 | -651,69693 | 0       | 0       | NS | 0 | 0 | 0 | 0 | 0 | 0 | 0 | 0 | 0 | 0 | 0 | 0 | 0 | 0 | 0 | hypothetical protein              | TIGR01685  | TIGR01685(MDP-1: magnesium-dependent phosphatase-1)          |
| Supercontig_1.6_MVL<br>G_01090_10sp   | -1344,417  | -1344,4167 | 0       | 0       | NS | 0 | 0 | 0 | 0 | 0 | 0 | 0 | 0 | 0 | 0 | 0 | 0 | 0 | 0 | 0 | hypothetical protein              | PF02985.15 | HEAT(HEAT repeat)                                            |
| Supercontig_1.3_MVL<br>G_00535_6sp    | -730,32421 | -730,32412 | 0       | 0       | NS | 0 | 0 | 0 | 0 | 0 | 0 | 0 | 0 | 0 | 0 | 0 | 0 | 0 | 0 | 0 | hypothetical protein              | PF00378.13 | ECH(Enoyl-CoA hydratase/isomerase family)                    |
| Supercontig_1.7_MVL<br>G_01282_10sp   | -886,84722 | -885,67847 | 2,3375  | 0,68924 | NS | 0 | 0 | 0 | 0 | 0 | 0 | 0 | 0 | 0 | 0 | 0 | 0 | 0 | 0 | 0 | hypothetical protein              | NA         | NA                                                           |
| Supercontig_1.54_MV<br>LG_04682_9sp   | -787,6204  | -787,47665 | 0,2875  | 0,1339  | NS | 0 | 0 | 0 | 0 | 0 | 0 | 0 | 0 | 0 | 0 | 0 | 0 | 0 | 0 | 0 | hypothetical protein              | NA         | NA                                                           |
| Supercontig_1.135_MV<br>LG_06632_7sp  | -498,65958 | -498,10019 | 1,11878 | 0,42844 | NS | 0 | 0 | 0 | 0 | 0 | 0 | 0 | 0 | 0 | 0 | 0 | 0 | 0 | 0 | 0 | CDF-like metal transporter        | PF01545.14 | Cation_efflux(Cation efflux family)                          |
| Supercontig_1.24_MV<br>LG_02841_9sp   | -1504,3786 | -1504,2118 | 0,33366 | 0,15366 | NS | 0 | 0 | 0 | 0 | 0 | 0 | 0 | 0 | 0 | 0 | 0 | 0 | 0 | 0 | 0 | hypothetical protein              | PF03815.12 | LCCL(LCCL domain)                                            |
| Supercontig_1.39_MV<br>LG_03859_10sp  | -748,62642 | -748,62642 | 0       | 0       | NS | 0 | 0 | 0 | 0 | 0 | 0 | 0 | 0 | 0 | 0 | 0 | 0 | 0 | 0 | 0 | hypothetical protein              | PF01490.11 | Aa_trans(Transmembrane amino acid transporter protein)       |
| Supercontig_1.4_MVL<br>G_00863_11sp   | -508,27483 | -508,04178 | 0,4661  | 0,20789 | NS | 0 | 0 | 0 | 0 | 0 | 0 | 0 | 0 | 0 | 0 | 0 | 0 | 0 | 0 | 0 | hypothetical protein              | PF00515.21 | TPR_1(Tetratricopeptide repeat)                              |
| Supercontig_1.52_MV<br>LG_04564_10sp  | -501,78123 | -501,7803  | 0,00186 | 0,00093 | NS | 0 | 0 | 0 | 0 | 0 | 0 | 0 | 0 | 0 | 0 | 0 | 0 | 0 | 0 | 0 | hypothetical protein              | PF08662.4  | eIF2A(Eukaryotic translation initiation factor eIF2A)        |
| Supercontig_1.110_MV<br>LG_06302_8sp  | -315,54559 | -315,54559 | 0       | 0       | NS | 0 | 0 | 0 | 0 | 0 | 0 | 0 | 0 | 0 | 0 | 0 | 0 | 0 | 0 | 0 | hypothetical protein              | PF01423.15 | LSM(LSM domain)                                              |
| Supercontig_1.109_MV<br>LG_06284_12sp | -397,47307 | -397,4232  | 0,09974 | 0,04865 | NS | 0 | 0 | 0 | 0 | 0 | 0 | 0 | 0 | 0 | 0 | 0 | 0 | 0 | 0 | 0 | hypothetical protein              | TIGR00030  | TIGR00030(S21p: ribosomal protein S21)                       |
| Supercontig_1.64_MV<br>LG_05095_9sp   | -460,22079 | -460,22079 | 0       | 0       | NS | 0 | 0 | 0 | 0 | 0 | 0 | 0 | 0 | 0 | 0 | 0 | 0 | 0 | 0 | 0 | hypothetical protein              | PF08578.3  | DUF1765(Protein of unknown function (DUF1765))               |

|                                      |            |            |         |         |    |   |   |   |   |                                          |            |                                                                |
|--------------------------------------|------------|------------|---------|---------|----|---|---|---|---|------------------------------------------|------------|----------------------------------------------------------------|
| Supercontig_1.2_MVL<br>G_00350_10sp  | -622,27902 | -622,27834 | 0,00136 | 0,00068 | NS | 0 | □ | □ | □ | TATA-box-binding protein                 | PF00352.14 | TBP(Transcription factor TFIID (or TATA-binding protein, TBP)) |
| Supercontig_1.5_MVL<br>G_00888_9sp   | -556,19919 | -555,26801 | 1,86236 | 0,60591 | NS | 0 | □ | □ | □ | hsp10-like protein                       | PF00166.14 | Cpn10(Chaperonin 10 Kd subunit)                                |
| Supercontig_1.21_MV<br>LG_02614_8sp  | -885,15413 | -885,1538  | 0,00066 | 0,00033 | NS | 0 | □ | □ | □ | hypothetical protein                     | PF00400.25 | WD40(WD domain, G-beta repeat)                                 |
| Supercontig_1.21_MV<br>LG_02632_12sp | -378,84489 | -378,5996  | 0,49058 | 0,21752 | NS | 0 | □ | □ | □ | hypothetical protein                     | NA         | NA                                                             |
| Supercontig_1.4_MVL<br>G_00720_10sp  | -374,80699 | -374,18928 | 1,23542 | 0,46082 | NS | 0 | □ | □ | □ | uracil phosphoribosyltransferase         | TIGR01091  | TIGR01091(upp: uracil phosphoribosyltransferase)               |
| Supercontig_1.15_MV<br>LG_02153_9sp  | -378,86383 | -378,86383 | 0       | 0       | NS | 0 | □ | □ | □ | hypothetical protein                     | NA         | NA                                                             |
| Supercontig_1.11_MV<br>LG_01762_8sp  | -368,0302  | -366,50967 | 3,04106 | 0,7814  | NS | 0 | □ | □ | □ | hypothetical protein                     | NA         | NA                                                             |
| Supercontig_1.2_MVL<br>G_00440_11sp  | -349,80317 | -349,80305 | 0,00024 | 0,00012 | NS | 0 | □ | □ | □ | hypothetical protein                     | PF03547.11 | Mem_trans(Membrane transport protein)                          |
| Supercontig_1.35_MV<br>LG_03592_9sp  | -518,02786 | -517,58866 | 0,8784  | 0,35545 | NS | 0 | □ | □ | □ | DNA-directed RNA polymerase II subunit H | PF03870.8  | RNA_pol_Rpb8(RNA polymerase Rpb8)                              |
| Supercontig_1.14_MV<br>LG_02033_6sp  | -1180,8213 | -1180,8107 | 0,02138 | 0,01063 | NS | 0 | □ | □ | □ | hypothetical protein                     | TIGR01494  | TIGR01494(ATPase_P-type: HAD ATPase, P-type, family IC)        |
| Supercontig_1.36_MV<br>LG_03660_10sp | -589,72577 | -589,67867 | 0,0942  | 0,04601 | NS | 0 | □ | □ | □ | CAMKK/ELM protein kinase                 | PF07714.10 | Pkinase_Tyr(Protein tyrosine kinase)                           |
| Supercontig_1.54_MV<br>LG_04653_9sp  | -542,81259 | -542,81205 | 0,00108 | 0,00054 | NS | 0 | □ | □ | □ | hypothetical protein                     | PF04189.6  | Gcd10p(Gcd10p family)                                          |
| Supercontig_1.77_MV<br>LG_05544_9sp  | -655,11902 | -655,11857 | 0,0009  | 0,00045 | NS | 0 | □ | □ | □ | hypothetical protein                     | PF11799.1  | IMS_C(impB/mucB/samB family C-terminal)                        |
| Supercontig_1.32_MV<br>LG_03440_7sp  | -854,6293  | -854,32068 | 0,61724 | 0,26554 | NS | 0 | □ | □ | □ | imidazoleglycerol-phosphate dehydratase  | PF00475.11 | IGPD(Imidazoleglycerol-phosphate dehydratase)                  |
| Supercontig_1.38_MV<br>LG_03797_6sp  | -600,08081 | -600,08063 | 0,00036 | 0,00018 | NS | 0 | □ | □ | □ | hypothetical protein                     | TIGR00177  | TIGR00177(molyb_syn: molybdenum cofactor synthesis domain)     |
| Supercontig_1.102_MV<br>LG_06182_7sp | -357,58371 | -356,82802 | 1,51138 | 0,53031 | NS | 0 | □ | □ | □ | hypothetical protein                     | NA         | NA                                                             |
| Supercontig_1.41_MV<br>LG_03984_11sp | -622,90448 | -622,90448 | 0       | 0       | NS | 0 | □ | □ | □ | hypothetical protein                     | PF02893.13 | GRAM(GRAM domain)                                              |
| Supercontig_1.56_MV<br>LG_04785_6sp  | -625,39487 | -625,24728 | 0,29518 | 0,13722 | NS | 0 | □ | □ | □ | hypothetical protein                     | NA         | NA                                                             |
| Supercontig_1.99_MV<br>LG_06117_6sp  | -618,48777 | -618,48777 | 0       | 0       | NS | 0 | □ | □ | □ | hypothetical protein                     | NA         | NA                                                             |
| Supercontig_1.24_MV<br>LG_02847_9sp  | -456,87945 | -456,56542 | 0,62806 | 0,2695  | NS | 0 | □ | □ | □ | hypothetical protein                     | PF00237.12 | Ribosomal_L22(Ribosomal protein L22p/L17e)                     |
| Supercontig_1.17_MV<br>LG_02291_6sp  | -726,52411 | -725,46641 | 2,1154  | 0,65275 | NS | 0 | □ | □ | □ | hypothetical protein                     | PF06966.5  | DUF1295(Protein of unknown function (DUF1295))                 |
| Supercontig_1.122_MV<br>LG_06467_8sp | -509,47046 | -509,47037 | 0,00018 | 0       | NS | 0 | □ | □ | □ | hypothetical protein                     | PF00400.25 | WD40(WD domain, G-beta repeat)                                 |





|                                       |            |            |         |         |    |   |   |   |   |   |                                                    |            |                                                                             |
|---------------------------------------|------------|------------|---------|---------|----|---|---|---|---|---|----------------------------------------------------|------------|-----------------------------------------------------------------------------|
| Supercontig_1.62_MV<br>LG_05000_7sp   | -513,47765 | -513,47765 | 0       | 0       | NS | 0 | 0 | 0 | 0 | 0 | hypothetical protein                               | PF00005.20 | ABC_tran(ABC transporter)                                                   |
| Supercontig_1.17_MV<br>LG_02258_10sp  | -843,16454 | -841,91481 | 2,49946 | 0,71342 | NS | 0 | 0 | 0 | 0 | 0 | hypothetical protein                               | PF00226.24 | DnaJ(DnaJ domain)                                                           |
| Supercontig_1.5_MVL<br>G_01008_8sp    | -438,39967 | -438,39953 | 0,00028 | 0,00014 | NS | 0 | 0 | 0 | 0 | 0 | seryl-tRNA synthetase,<br>cytoplasmic              | PF00587.18 | tRNA-synt_2b(tRNA synthetase<br>class II core domain (G, H, P, S<br>and T)) |
| Supercontig_1.15_MV<br>LG_02140_7sp   | -1050,1691 | -1049,8044 | 0,7294  | 0,3056  | NS | 0 | 0 | 0 | 0 | 0 | diphosphomevalonate<br>decarboxylase               | PF00288.19 | GHMP_kinases_N(GHMP<br>kinases N terminal domain)                           |
| Supercontig_1.94_MV<br>LG_05999_9sp   | -386,89664 | -386,88185 | 0,02958 | 0,01468 | NS | 0 | 0 | 0 | 0 | 0 | hypothetical protein                               | PF03381.8  | CDC50(LEM3 (ligand-effect<br>modulator 3) family / CDC50<br>family)         |
| Supercontig_1.52_MV<br>LG_04561_9sp   | -960,47572 | -960,42017 | 0,1111  | 0,05404 | NS | 0 | 0 | 0 | 0 | 0 | hypothetical protein                               | NA         | NA                                                                          |
| Supercontig_1.8_MVL<br>G_01416_9sp    | -1012,6235 | -1012,6235 | 0       | 0       | NS | 0 | 0 | 0 | 0 | 0 | protein SEY1                                       | PF00350.16 | Dynamin_N(Dynamin family)                                                   |
| Supercontig_1.6_MVL<br>G_01111_9sp    | -388,29845 | -386,65212 | 3,29266 | 0,80724 | NS | 0 | 0 | 0 | 0 | 0 | hypothetical protein                               | PF01633.13 | Choline_kinase(Choline/ethanola<br>mine kinase)                             |
| Supercontig_1.41_MV<br>LG_03993_12sp  | -926,09344 | -926,09294 | 0,001   | 0,0005  | NS | 0 | 0 | 0 | 0 | 0 | hypothetical protein                               | TIGR00378  | TIGR00378(cax: calcium/proton<br>exchanger)                                 |
| Supercontig_1.87_MV<br>LG_05847_12sp  | -661,95747 | -661,31875 | 1,27744 | 0,47203 | NS | 0 | 0 | 0 | 0 | 0 | hypothetical protein                               | TIGR00879  | TIGR00879(SP: MFS<br>transporter, sugar porter (SP)<br>family)              |
| Supercontig_1.5_MVL<br>G_01016_9sp    | -477,20141 | -477,04809 | 0,30664 | 0,14214 | NS | 0 | 0 | 0 | 0 | 0 | hypothetical protein                               | PF00096.19 | zf-C2H2(Zinc finger, C2H2 type)                                             |
| Supercontig_1.24_MV<br>LG_02892_12sp  | -683,01789 | -683,01789 | 0       | 0       | NS | 0 | 0 | 0 | 0 | 0 | U5 small nuclear<br>ribonucleoprotein<br>component | PF03144.18 | GTP_EFTU_D2(Elongation<br>factor Tu domain 2)                               |
| Supercontig_1.4_MVL<br>G_00722_8sp    | -789,43178 | -789,43158 | 0,0004  | 0,0002  | NS | 0 | 0 | 0 | 0 | 0 | hypothetical protein                               | PF00153.20 | Mito_carr(Mitochondrial carrier<br>protein)                                 |
| Supercontig_1.28_MV<br>LG_03183_7sp   | -1036,3612 | -1036,3063 | 0,10988 | 0,05346 | NS | 0 | 0 | 0 | 0 | 0 | hypothetical protein                               | PF07264.4  | E124(Etoposide-induced protein<br>2.4 (E124))                               |
| Supercontig_1.62_MV<br>LG_05030_10sp  | -400,3515  | -400,35138 | 0,00024 | 0,00012 | NS | 0 | 0 | 0 | 0 | 0 | hypothetical protein                               | NA         | NA                                                                          |
| Supercontig_1.141_MV<br>LG_06701_6sp  | -1012,7675 | -1012,7675 | 0       | 0       | NS | 0 | 0 | 0 | 0 | 0 | hypothetical protein                               | PF09402.3  | MSC(Man1-Src1p-C-terminal<br>domain)                                        |
| Supercontig_1.7_MVL<br>G_01346_10sp   | -1755,9768 | -1755,9768 | 0       | 0       | NS | 0 | 0 | 0 | 0 | 0 | hypothetical protein                               | NA         | NA                                                                          |
| Supercontig_1.213_MV<br>LG_07134_10sp | -518,42358 | -518,42358 | 0       | 0       | NS | 0 | 0 | 0 | 0 | 0 | hypothetical protein                               | NA         | NA                                                                          |
| Supercontig_1.111_MV<br>LG_06308_11sp | -657,26752 | -657,26751 | 0       | 0       | NS | 0 | 0 | 0 | 0 | 0 | hypothetical protein                               | PF02475.9  | Met_10(Met-10+ like-protein)                                                |
| Supercontig_1.83_MV<br>LG_05742_11sp  | -511,27945 | -511,27902 | 0,00086 | 0,00043 | NS | 0 | 0 | 0 | 0 | 0 | hypothetical protein                               | PF03663.7  | Glyco_hydro_76(Glycosyl<br>hydrolase family 76)                             |
| Supercontig_1.61_MV<br>LG_04970_10sp  | -401,16658 | -401,16658 | 0       | 0       | NS | 0 | 0 | 0 | 0 | 0 | hypothetical protein                               | PF04116.6  | FA_hydroxylase(Fatty acid<br>hydroxylase superfamily)                       |
| Supercontig_1.101_MV<br>LG_06158_11sp | -430,67368 | -430,67368 | 0       | 0       | NS | 0 | 0 | 0 | 0 | 0 | hypothetical protein                               | PF01637.11 | Arch_ATPase(Archaeal ATPase)                                                |
| Supercontig_1.6_MVL<br>G_01161_7sp    | -289,89175 | -289,79551 | 0,19248 | 0,09175 | NS | 0 | 0 | 0 | 0 | 0 | hypothetical protein                               | PF03765.8  | CRAL_TRIO_N(CRAL/TRIO, N-<br>terminus)                                      |
| Supercontig_1.46_MV<br>LG_04262_10sp  | -352,5893  | -352,5893  | 0       | 0       | NS | 0 | 0 | 0 | 0 | 0 | hypothetical protein                               | PF07719.10 | TPR_2(Tetratricopeptide repeat)                                             |

|                                      |            |            |         |         |    |   |  |  |  |  |                                                            |            |                                                                      |
|--------------------------------------|------------|------------|---------|---------|----|---|--|--|--|--|------------------------------------------------------------|------------|----------------------------------------------------------------------|
| Supercontig_1.58_MV<br>LG_04863_11sp | -526,16893 | -525,17057 | 1,99672 | 0,63152 | NS | 0 |  |  |  |  | hypothetical protein                                       | PF08615.4  | RNase_H2_suC(Ribonuclease H2 non-catalytic subunit (Ylr154p-like))   |
| Supercontig_1.45_MV<br>LG_04187_10sp | -743,78526 | -743,78487 | 0,00078 | 0,00039 | NS | 0 |  |  |  |  | carbamoyl-phosphate synthase arginine-specific large chain | PF02222.15 | ATP-grasp(ATP-grasp domain)                                          |
| Supercontig_1.49_MV<br>LG_04419_7sp  | -504,98355 | -504,97803 | 0,01104 | 0,0055  | NS | 0 |  |  |  |  | hypothetical protein                                       | PF08287.4  | DASH_Spc19(Spc19)                                                    |
| Supercontig_1.4_MVL<br>G_00697_10sp  | -943,10423 | -943,10423 | 0       | 0       | NS | 0 |  |  |  |  | hypothetical protein                                       | PF06333.5  | Med13_C(Mediator complex subunit 13 C-terminal)                      |
| Supercontig_1.56_MV<br>LG_04775_8sp  | -550,51118 | -550,51118 | 0       | 0       | NS | 0 |  |  |  |  | hypothetical protein                                       | PF06912.4  | DUF1275(Protein of unknown function (DUF1275))                       |
| Supercontig_1.203_MV<br>LG_07098_9sp | -890,31915 | -890,31915 | 0       | 0       | NS | 0 |  |  |  |  | hypothetical protein                                       | PF04499.8  | SAPS(SIT4 phosphatase-associated protein)                            |
| Supercontig_1.5_MVL<br>G_00967_11sp  | -434,07552 | -434,0755  | 0       | 0       | NS | 0 |  |  |  |  | hypothetical protein                                       | PF00226.24 | DnaJ(DnaJ domain)                                                    |
| Supercontig_1.156_MV<br>LG_06830_8sp | -783,32727 | -783,32727 | 0       | 0       | NS | 0 |  |  |  |  | hypothetical protein                                       | PF00909.14 | Ammonium_transp(Ammonium Transporter Family)                         |
| Supercontig_1.44_MV<br>LG_04181_9sp  | -560,91539 | -560,91539 | 0       | 0       | NS | 0 |  |  |  |  | hypothetical protein                                       | PF00106.18 | adh_short(short chain dehydrogenase)                                 |
| Supercontig_1.180_MV<br>LG_07002_9sp | -970,8806  | -970,72563 | 0,30994 | 0,14356 | NS | 0 |  |  |  |  | AGC/AKT protein kinase                                     | PF07714.10 | Pkinase_Tyr(Protein tyrosine kinase)                                 |
| Supercontig_1.27_MV<br>LG_03126_9sp  | -688,81907 | -688,81907 | 0       | 0       | NS | 0 |  |  |  |  | hypothetical protein                                       | PF00995.16 | Sec1(Sec1 family)                                                    |
| Supercontig_1.29_MV<br>LG_03212_8sp  | -1148,2445 | -1148,2444 | 0,00014 | 0       | NS | 0 |  |  |  |  | hypothetical protein                                       | PF00400.25 | WD40(WD domain, G-beta repeat)                                       |
| Supercontig_1.24_MV<br>LG_02891_6sp  | -361,26105 | -361,26093 | 0,00024 | 0,00012 | NS | 0 |  |  |  |  | endoribonuclease L-PSP                                     | PF01042.14 | Ribonuc_L-PSP(Endoribonuclease L-PSP)                                |
| Supercontig_1.30_MV<br>LG_03270_8sp  | -520,65305 | -520,65288 | 0,00034 | 0,00017 | NS | 0 |  |  |  |  | tryptophan synthase                                        | TIGR00262  | TIGR00262(trpA: tryptophan synthase, alpha subunit)                  |
| Supercontig_1.20_MV<br>LG_02561_12sp | -538,849   | -538,8397  | 0,0186  | 0,00926 | NS | 0 |  |  |  |  | hypothetical protein                                       | PF05721.6  | PhyH(Phytanoyl-CoA dioxygenase (PhyH))                               |
| Supercontig_1.7_MVL<br>G_01232_11sp  | -521,87066 | -521,87065 | 0       | 0       | NS | 0 |  |  |  |  | hypothetical protein                                       | NA         | NA                                                                   |
| Supercontig_1.1_MVL<br>G_00181_7sp   | -620,6297  | -619,24085 | 2,7777  | 0,75064 | NS | 0 |  |  |  |  | hypothetical protein                                       | NA         | NA                                                                   |
| Supercontig_1.40_MV<br>LG_03927_8sp  | -396,50533 | -396,16062 | 0,68942 | 0,29157 | NS | 0 |  |  |  |  | NADH-ubiquinone oxidoreductase 78 kDa subunit              | PF00384.15 | Molybdopterin(Molybdopterin oxidoreductase)                          |
| Supercontig_1.63_MV<br>LG_05073_10sp | -444,47821 | -444,47821 | 0       | 0       | NS | 0 |  |  |  |  | hypothetical protein                                       | PF03126.11 | Plus-3(Plus-3 domain)                                                |
| Supercontig_1.34_MV<br>LG_03573_10sp | -457,85764 | -457,85765 | 0       | 0       | NS | 0 |  |  |  |  | hypothetical protein                                       | NA         | NA                                                                   |
| Supercontig_1.15_MV<br>LG_02156_7sp  | -620,27785 | -619,07064 | 2,41442 | 0,70097 | NS | 0 |  |  |  |  | hypothetical protein                                       | PF10165.2  | Ric8(Guanine nucleotide exchange factor synembryn)                   |
| Supercontig_1.41_MV<br>LG_04003_10sp | -442,47188 | -442,28535 | 0,37306 | 0,17017 | NS | 0 |  |  |  |  | hypothetical protein                                       | PF04194.6  | PDCD2_C(Programmed cell death protein 2, C-terminal putative domain) |
| Supercontig_1.20_MV<br>LG_02562_6sp  | -1287,5319 | -1287,446  | 0,17168 | 0,08226 | NS | 0 |  |  |  |  | hypothetical protein                                       | PF00106.18 | adh_short(short chain dehydrogenase)                                 |





|                                       |            |            |         |         |    |   |  |  |  |                                                            |            |                                                                                        |
|---------------------------------------|------------|------------|---------|---------|----|---|--|--|--|------------------------------------------------------------|------------|----------------------------------------------------------------------------------------|
| Supercontig_1.32_MV<br>LG_03394_7sp   | -620,3348  | -618,88992 | 2,88976 | 0,76423 | NS | 0 |  |  |  | hypothetical protein                                       | NA         | NA                                                                                     |
| Supercontig_1.113_MV<br>LG_06336_11sp | -453,19869 | -452,13362 | 2,13014 | 0,6553  | NS | 0 |  |  |  | hypothetical protein                                       | NA         | NA                                                                                     |
| Supercontig_1.96_MV<br>LG_06050_7sp   | -517,26108 | -517,26097 | 0,00022 | 0,00011 | NS | 0 |  |  |  | NADH dehydrogenase<br>(ubiquinone) 1 alpha<br>subcomplex 8 | PF06747.6  | CHCH(CHCH domain)                                                                      |
| Supercontig_1.20_MV<br>LG_02564_7sp   | -1216,3112 | -1216,2496 | 0,12326 | 0,05977 | NS | 0 |  |  |  | hypothetical protein                                       | PF03781.9  | FGE-sulfatase(Formylglycine-<br>generating sulfatase enzyme)                           |
| Supercontig_1.25_MV<br>LG_02952_10sp  | -1210,2763 | -1210,2763 | 0       | 0       | NS | 0 |  |  |  | hypothetical protein                                       | PF09421.3  | FRQ(Frequency clock protein)                                                           |
| Supercontig_1.47_MV<br>LG_04345_8sp   | -608,28789 | -608,28789 | 0       | 0       | NS | 0 |  |  |  | hypothetical protein                                       | NA         | NA                                                                                     |
| Supercontig_1.31_MV<br>LG_03359_11sp  | -2439,2361 | -2437,4468 | 3,57856 | 0,83292 | NS | 0 |  |  |  | CAMK protein kinase                                        | PF07714.10 | Pkinase_Tyr(Protein tyrosine<br>kinase)                                                |
| Supercontig_1.1_MVL<br>G_00248_8sp    | -615,40745 | -614,05891 | 2,69708 | 0,74038 | NS | 0 |  |  |  | hypothetical protein                                       | NA         | NA                                                                                     |
| Supercontig_1.132_MV<br>LG_06592_8sp  | -778,80074 | -778,80073 | 0       | 0       | NS | 0 |  |  |  | hypothetical protein                                       | NA         | NA                                                                                     |
| Supercontig_1.7_MVL<br>G_01338_8sp    | -412,29513 | -412,00184 | 0,58658 | 0,25419 | NS | 0 |  |  |  | hypothetical protein                                       | PF04142.8  | Nuc_sug_transp(Nucleotide-<br>sugar transporter)                                       |
| Supercontig_1.42_MV<br>LG_04061_6sp   | -505,77255 | -505,67823 | 0,18864 | 0,09001 | NS | 0 |  |  |  | hypothetical protein                                       | NA         | NA                                                                                     |
| Supercontig_1.26_MV<br>LG_03009_10sp  | -679,55221 | -676,98636 | 5,1317  | 0,92315 | *  | 0 |  |  |  | hypothetical protein                                       | PF01285.11 | TEA(TEA/ATTS domain family)                                                            |
| Supercontig_1.12_MV<br>LG_01883_8sp   | -394,6998  | -394,69979 | 0       | 0       | NS | 0 |  |  |  | actin                                                      | PF00022.12 | Actin(Actin)                                                                           |
| Supercontig_1.59_MV<br>LG_04912_8sp   | -606,24385 | -606,24385 | 0       | 0       | NS | 0 |  |  |  | hypothetical protein                                       | NA         | NA                                                                                     |
| Supercontig_1.88_MV<br>LG_05877_10sp  | -413,58363 | -413,58347 | 0,00032 | 0,00016 | NS | 0 |  |  |  | hypothetical protein                                       | PF02225.15 | PA(PA domain)                                                                          |
| Supercontig_1.10_MV<br>LG_01659_6sp   | -266,06125 | -266,06096 | 0,00058 | 0,00029 | NS | 0 |  |  |  | NADH dehydrogenase<br>(ubiquinone) 1 alpha<br>subcomplex 2 | PF05047.9  | L51_S25_C1-B8(Mitochondrial<br>ribosomal protein L51 / S25 / C1-<br>B8 domain)         |
| Supercontig_1.27_MV<br>LG_03085_7sp   | -400,97587 | -400,75162 | 0,4485  | 0,20088 | NS | 0 |  |  |  | histone H2A                                                | PF00808.16 | CBFD_NFYB_HMF(Histone-like<br>transcription factor (CBF/NF-Y)<br>and archaeal histone) |
| Supercontig_1.27_MV<br>LG_03064_7sp   | -686,89858 | -686,89858 | 0       | 0       | NS | 0 |  |  |  | hypothetical protein                                       | TIGR02967  | TIGR02967(guan_deamin:<br>guanine deaminase)                                           |
| Supercontig_1.117_MV<br>LG_06399_7sp  | -296,98741 | -296,94067 | 0,09348 | 0,04566 | NS | 0 |  |  |  | hypothetical protein                                       | NA         | NA                                                                                     |
| Supercontig_1.15_MV<br>LG_02080_9sp   | -653,38295 | -653,38295 | 0       | 0       | NS | 0 |  |  |  | hypothetical protein                                       | PF04664.6  | OGFr_N(Opioid growth factor<br>receptor (OGFr) conserved<br>region)                    |
| Supercontig_1.74_MV<br>LG_05450_6sp   | -812,26122 | -812,26103 | 0,00038 | 0,00019 | NS | 0 |  |  |  | hypothetical protein                                       | PF07978.6  | NIPSNAP(NIPSNAP)                                                                       |
| Supercontig_1.54_MV<br>LG_04693_9sp   | -871,03462 | -871,03462 | 0       | 0       | NS | 0 |  |  |  | hypothetical protein                                       | PF00534.13 | Glycos_transf_1(Glycosyl<br>transferases group 1)                                      |

|                                      |            |            |         |         |    |   |  |  |  |  |                           |            |                                                                 |
|--------------------------------------|------------|------------|---------|---------|----|---|--|--|--|--|---------------------------|------------|-----------------------------------------------------------------|
| Supercontig_1.18_MV<br>LG_02408_10sp | -453,49006 | -453,49006 | 0       | 0       | NS | 0 |  |  |  |  | hypothetical protein      | PF09768.2  | Peptidase_M76(Peptidase M76 family)                             |
| Supercontig_1.59_MV<br>LG_04900_9sp  | -367,03958 | -367,03951 | 0,00014 | 0       | NS | 0 |  |  |  |  | hypothetical protein      | NA         | NA                                                              |
| Supercontig_1.2_MVL<br>G_00392_10sp  | -583,53328 | -583,53328 | 0       | 0       | NS | 0 |  |  |  |  | hypothetical protein      | PF05729.5  | NACHT(NACHT domain)                                             |
| Supercontig_1.4_MVL<br>G_00764_6sp   | -1111,3435 | -1110,9165 | 0,854   | 0,34754 | NS | 0 |  |  |  |  | hypothetical protein      | NA         | NA                                                              |
| Supercontig_1.26_MV<br>LG_03003_9sp  | -488,95306 | -488,95297 | 0,00018 | 0       | NS | 0 |  |  |  |  | hypothetical protein      | PF00400.25 | WD40(WD domain, G-beta repeat)                                  |
| Supercontig_1.50_MV<br>LG_04460_12sp | -982,32984 | -982,32984 | 0       | 0       | NS | 0 |  |  |  |  | hypothetical protein      | PF00515.21 | TPR_1(Tetratricopeptide repeat)                                 |
| Supercontig_1.50_MV<br>LG_04459_9sp  | -736,06432 | -736,06432 | 0       | 0       | NS | 0 |  |  |  |  | hypothetical protein      | NA         | NA                                                              |
| Supercontig_1.4_MVL<br>G_00862_8sp   | -702,08014 | -701,70348 | 0,75332 | 0,31385 | NS | 0 |  |  |  |  | hypothetical protein      | PF00102.20 | Y_phosphatase(Protein-tyrosine phosphatase)                     |
| Supercontig_1.41_MV<br>LG_03974_6sp  | -405,6353  | -405,63527 | 0       | 0       | NS | 0 |  |  |  |  | hypothetical protein      | PF00485.11 | PRK(Phosphoribulokinase / Uridine kinase family)                |
| Supercontig_1.30_MV<br>LG_03295_7sp  | -609,6218  | -609,62111 | 0,00138 | 0,00069 | NS | 0 |  |  |  |  | 40S ribosomal protein S14 | PF00411.12 | Ribosomal_S11(Ribosomal protein S11)                            |
| Supercontig_1.3_MVL<br>G_00527_12sp  | -658,08352 | -657,86071 | 0,44562 | 0,19973 | NS | 0 |  |  |  |  | hypothetical protein      | PF01369.13 | Sec7(Sec7 domain)                                               |
| Supercontig_1.2_MVL<br>G_00307_10sp  | -729,54805 | -729,54805 | 0       | 0       | NS | 0 |  |  |  |  | hypothetical protein      | NA         | NA                                                              |
| Supercontig_1.6_MVL<br>G_01142_7sp   | -530,24137 | -528,76614 | 2,95046 | 0,77127 | NS | 0 |  |  |  |  | hypothetical protein      | NA         | NA                                                              |
| Supercontig_1.4_MVL<br>G_00876_8sp   | -554,72114 | -554,72114 | 0       | 0       | NS | 0 |  |  |  |  | hypothetical protein      | PF01399.20 | PCI(PCI domain)                                                 |
| Supercontig_1.33_MV<br>LG_03455_10sp | -279,71613 | -278,47267 | 2,48692 | 0,71162 | NS | 0 |  |  |  |  | hypothetical protein      | PF01053.13 | Cys_Met_Meta_PP(Cys/Met metabolism PLP-dependent enzyme)        |
| Supercontig_1.36_MV<br>LG_03684_10sp | -495,42823 | -494,8882  | 1,08006 | 0,41727 | NS | 0 |  |  |  |  | hypothetical protein      | NA         | NA                                                              |
| Supercontig_1.18_MV<br>LG_02398_9sp  | -584,63282 | -583,76865 | 1,72834 | 0,5786  | NS | 0 |  |  |  |  | hypothetical protein      | PF06745.6  | KaiC(KaiC)                                                      |
| Supercontig_1.70_MV<br>LG_05317_8sp  | -824,77113 | -824,6204  | 0,30146 | 0,13992 | NS | 0 |  |  |  |  | hypothetical protein      | PF00135.21 | COesterase(Carboxylesterase)                                    |
| Supercontig_1.2_MVL<br>G_00357_8sp   | -495,1591  | -495,1591  | 0       | 0       | NS | 0 |  |  |  |  | hypothetical protein      | PF01025.12 | GrpE(GrpE)                                                      |
| Supercontig_1.28_MV<br>LG_03158_10sp | -570,60263 | -570,60238 | 0,0005  | 0,00025 | NS | 0 |  |  |  |  | protein ARG5,6            | PF01118.17 | Semialdehyde_dh(Semialdehyde dehydrogenase, NAD binding domain) |
| Supercontig_1.3_MVL<br>G_00667_9sp   | -1407,3772 | -1406,6803 | 1,39386 | 0,50189 | NS | 0 |  |  |  |  | hypothetical protein      | NA         | NA                                                              |
| Supercontig_1.1_MVL<br>G_00004_7sp   | -392,10661 | -392,1065  | 0       | 0       | NS | 0 |  |  |  |  | hypothetical protein      | PF00153.20 | Mito_carr(Mitochondrial carrier protein)                        |
| Supercontig_1.9_MVL<br>G_01558_10sp  | -333,74053 | -333,74049 | 0       | 0       | NS | 0 |  |  |  |  | hypothetical protein      | NA         | NA                                                              |
| Supercontig_1.17_MV<br>LG_02333_8sp  | -1067,3619 | -1066,775  | 1,17374 | 0,44393 | NS | 0 |  |  |  |  | hypothetical protein      | PF02985.15 | HEAT(HEAT repeat)                                               |
| Supercontig_1.11_MV<br>LG_01703_7sp  | -848,07056 | -848,15724 | 0       | 0       | NS | 0 |  |  |  |  | hypothetical protein      | PF04658.6  | TAFII55_N(TAFII55 protein conserved region)                     |

|                                       |            |            |         |         |    |   |  |  |  |                                |            |                                                                     |
|---------------------------------------|------------|------------|---------|---------|----|---|--|--|--|--------------------------------|------------|---------------------------------------------------------------------|
| Supercontig_1.141_MV<br>LG_06691_11sp | -486,11854 | -484,92106 | 2,39496 | 0,69805 | NS | 0 |  |  |  | hypothetical protein           | PF00107.19 | ADH_zinc_N(Zinc-binding dehydrogenase)                              |
| Supercontig_1.74_MV<br>LG_05448_6sp   | -490,3117  | -490,3117  | 0       | 0       | NS | 0 |  |  |  | CAMK/CAMK1 protein kinase      | PF07714.10 | Pkinase_Tyr(Protein tyrosine kinase)                                |
| Supercontig_1.189_MV<br>LG_07039_8sp  | -361,93435 | -361,56088 | 0,74694 | 0,31166 | NS | 0 |  |  |  | hypothetical protein           | PF04112.6  | Mak10(Mak10 subunit, NatC N(alpha)-terminal acetyltransferase)      |
| Supercontig_1.16_MV<br>LG_02253_9sp   | -577,30856 | -576,62811 | 1,3609  | 0,49361 | NS | 0 |  |  |  | hypothetical protein           | NA         | NA                                                                  |
| Supercontig_1.4_MVL<br>G_00834_10sp   | -277,34554 | -277,34526 | 0,00056 | 0,00028 | NS | 0 |  |  |  | 40S ribosomal protein S28      | PF01200.11 | Ribosomal_S28e(Ribosomal protein S28e)                              |
| Supercontig_1.15_MV<br>LG_02134_7sp   | -725,57361 | -725,57361 | 0       | 0       | NS | 0 |  |  |  | hypothetical protein           | TIGR02411  | TIGR02411(leuko_A4_hydro: leukotriene A-4 hydrolase/aminopeptidase) |
| Supercontig_1.63_MV<br>LG_05079_11sp  | -695,89614 | -695,89582 | 0,00064 | 0,00032 | NS | 0 |  |  |  | hypothetical protein           | PF03151.9  | TPT(Triose-phosphate Transporter family)                            |
| Supercontig_1.2_MVL<br>G_00412_10sp   | -1393,9752 | -1393,9752 | 0       | 0       | NS | 0 |  |  |  | hypothetical protein           | PF07823.4  | CPDase(Cyclic phosphodiesterase-like protein)                       |
| Supercontig_1.42_MV<br>LG_04067_6sp   | -348,78714 | -348,78711 | 0       | 0       | NS | 0 |  |  |  | hypothetical protein           | PF00018.21 | SH3_1(SH3 domain)                                                   |
| Supercontig_1.59_MV<br>LG_04917_10sp  | -586,89325 | -586,89325 | 0       | 0       | NS | 0 |  |  |  | NADPH2:quinone reductase       | PF00107.19 | ADH_zinc_N(Zinc-binding dehydrogenase)                              |
| Supercontig_1.30_MV<br>LG_03321_10sp  | -384,97582 | -384,97582 | 0       | 0       | NS | 0 |  |  |  | hypothetical protein           | PF08610.3  | Pex16(Peroxisomal membrane protein (Pex16))                         |
| Supercontig_1.26_MV<br>LG_03001_9sp   | -600,4656  | -600,46331 | 0,00458 | 0,00229 | NS | 0 |  |  |  | hypothetical protein           | NA         | NA                                                                  |
| Supercontig_1.19_MV<br>LG_02448_10sp  | -486,70949 | -486,64451 | 0,12996 | 0,06291 | NS | 0 |  |  |  | hypothetical protein           | PF01529.13 | zf-DHHC(DHHC zinc finger domain)                                    |
| Supercontig_1.56_MV<br>LG_04763_11sp  | -581,19976 | -581,08942 | 0,22068 | 0,10447 | NS | 0 |  |  |  | hypothetical protein           | NA         | NA                                                                  |
| Supercontig_1.55_MV<br>LG_04744_8sp   | -589,79655 | -589,79646 | 0,00018 | 0       | NS | 0 |  |  |  | hypothetical protein           | PF03810.12 | IBN_N(Importin-beta N-terminal domain)                              |
| Supercontig_1.141_MV<br>LG_06692_6sp  | -620,00248 | -620,00242 | 0,00012 | 0       | NS | 0 |  |  |  | importin subunit alpha-1       | PF02985.15 | HEAT(HEAT repeat)                                                   |
| Supercontig_1.42_MV<br>LG_04066_7sp   | -896,99412 | -896,67134 | 0,64556 | 0,27587 | NS | 0 |  |  |  | hypothetical protein           | NA         | NA                                                                  |
| Supercontig_1.6_MVL<br>G_01154_7sp    | -602,53563 | -602,53563 | 0       | 0       | NS | 0 |  |  |  | hypothetical protein           | PF00378.13 | ECH(Enoyl-CoA hydratase/isomerase family)                           |
| Supercontig_1.47_MV<br>LG_04329_9sp   | -567,96911 | -567,93301 | 0,0722  | 0,03546 | NS | 0 |  |  |  | hypothetical protein           | NA         | NA                                                                  |
| Supercontig_1.12_MV<br>LG_01850_6sp   | -580,62999 | -580,62999 | 0       | 0       | NS | 0 |  |  |  | hypothetical protein           | PF05648.7  | PEX11(Peroxisomal biogenesis factor 11 (PEX11))                     |
| Supercontig_1.34_MV<br>LG_03529_9sp   | -506,5868  | -506,5868  | 0       | 0       | NS | 0 |  |  |  | NADH-cytochrome b5 reductase 1 | PF00175.14 | NAD_binding_1(Oxidoreductase NAD-binding domain)                    |
| Supercontig_1.11_MV<br>LG_01749_10sp  | -398,69902 | -396,74588 | 3,90628 | 0,85817 | NS | 0 |  |  |  | hypothetical protein           | PF11711.1  | Tim54(Inner membrane protein import complex subunit Tim54)          |
| Supercontig_1.25_MV<br>LG_02953_6sp   | -418,33242 | -418,33214 | 0,00056 | 0,00028 | NS | 0 |  |  |  | ADP-ribosylation factor 6      | PF04670.5  | Gtr1_RagA(Gtr1/RagA G protein conserved region)                     |
| Supercontig_1.5_MVL<br>G_00914_7sp    | -828,38993 | -827,48016 | 1,81954 | 0,59738 | NS | 0 |  |  |  | hypothetical protein           | PF03583.7  | LIP(Secretory lipase)                                               |



|                                       |            |            |         |         |    |   |   |   |   |   |   |   |   |   |   |   |   |   |   |   |                                         |            |                                                          |
|---------------------------------------|------------|------------|---------|---------|----|---|---|---|---|---|---|---|---|---|---|---|---|---|---|---|-----------------------------------------|------------|----------------------------------------------------------|
| Supercontig_1.13_MV<br>LG_01909_10sp  | -612,43522 | -612,43522 | 0       | 0       | NS | 0 | 0 | 0 | 0 | 0 | 0 | 0 | 0 | 0 | 0 | 0 | 0 | 0 | 0 | 0 | hypothetical protein                    | PF04479.6  | RTA1(RTA1 like protein)                                  |
| Supercontig_1.52_MV<br>LG_04589_9sp   | -425,07862 | -425,07854 | 0       | 0       | NS | 0 | 0 | 0 | 0 | 0 | 0 | 0 | 0 | 0 | 0 | 0 | 0 | 0 | 0 | 0 | hypothetical protein                    | NA         | NA                                                       |
| Supercontig_1.40_MV<br>LG_03965_9sp   | -524,60606 | -523,26962 | 2,67288 | 0,73722 | NS | 0 | 0 | 0 | 0 | 0 | 0 | 0 | 0 | 0 | 0 | 0 | 0 | 0 | 0 | 0 | hypothetical protein                    | NA         | NA                                                       |
| Supercontig_1.6_MVL<br>G_01159_7sp    | -585,16941 | -585,16941 | 0       | 0       | NS | 0 | 0 | 0 | 0 | 0 | 0 | 0 | 0 | 0 | 0 | 0 | 0 | 0 | 0 | 0 | hypothetical protein                    | NA         | NA                                                       |
| Supercontig_1.127_MV<br>LG_06543_12sp | -1357,4274 | -1357,4266 | 0,0017  | 0,00085 | NS | 0 | 0 | 0 | 0 | 0 | 0 | 0 | 0 | 0 | 0 | 0 | 0 | 0 | 0 | 0 | hypothetical protein                    | PF00018.21 | SH3_1(SH3 domain)                                        |
| Supercontig_1.13_MV<br>LG_01919_9sp   | -448,12219 | -447,65915 | 0,92608 | 0,37063 | NS | 0 | 0 | 0 | 0 | 0 | 0 | 0 | 0 | 0 | 0 | 0 | 0 | 0 | 0 | 0 | hypothetical protein                    | PF02141.14 | DENN(DENN (AEX-3) domain)                                |
| Supercontig_1.39_MV<br>LG_03856_7sp   | -480,10999 | -480,10977 | 0,00044 | 0,00022 | NS | 0 | 0 | 0 | 0 | 0 | 0 | 0 | 0 | 0 | 0 | 0 | 0 | 0 | 0 | 0 | vacuolar transporter<br>chaperone 1     | PF02656.8  | DUF202(Domain of unknown<br>function DUF)                |
| Supercontig_1.85_MV<br>LG_05790_6sp   | -623,55705 | -623,41417 | 0,28576 | 0,13314 | NS | 0 | 0 | 0 | 0 | 0 | 0 | 0 | 0 | 0 | 0 | 0 | 0 | 0 | 0 | 0 | hypothetical protein                    | NA         | NA                                                       |
| Supercontig_1.17_MV<br>LG_02271_8sp   | -450,22603 | -450,22595 | 0       | 0       | NS | 0 | 0 | 0 | 0 | 0 | 0 | 0 | 0 | 0 | 0 | 0 | 0 | 0 | 0 | 0 | hypothetical protein                    | PF04193.7  | PQ-loop(PQ loop repeat)                                  |
| Supercontig_1.30_MV<br>LG_03263_10sp  | -766,37549 | -766,37549 | 0       | 0       | NS | 0 | 0 | 0 | 0 | 0 | 0 | 0 | 0 | 0 | 0 | 0 | 0 | 0 | 0 | 0 | 5'-methylthioadenosine<br>phosphorylase | TIGR01694  | TIGR01694(MTAP:<br>methylthioadenosine<br>phosphorylase) |
| Supercontig_1.11_MV<br>LG_01692_8sp   | -903,55136 | -903,55135 | 0       | 0       | NS | 0 | 0 | 0 | 0 | 0 | 0 | 0 | 0 | 0 | 0 | 0 | 0 | 0 | 0 | 0 | hypothetical protein                    | PF04670.5  | Gtr1_RagA(Gtr1/RagA G protein<br>conserved region)       |
| Supercontig_1.81_MV<br>LG_05669_10sp  | -501,1239  | -501,12343 | 0       | 0       | NS | 0 | 0 | 0 | 0 | 0 | 0 | 0 | 0 | 0 | 0 | 0 | 0 | 0 | 0 | 0 | sterol 24-C-<br>methyltransferase       | PF08242.5  | Methyltransf_12(Methyltransferase<br>domain)             |
| Supercontig_1.6_MVL<br>G_01052_10sp   | -543,08765 | -543,0876  | 0       | 0       | NS | 0 | 0 | 0 | 0 | 0 | 0 | 0 | 0 | 0 | 0 | 0 | 0 | 0 | 0 | 0 | hypothetical protein                    | PF04000.8  | Sas10_Utp3(Sas10/Utp3/C1D<br>family)                     |
| Supercontig_1.59_MV<br>LG_04895_10sp  | -765,81227 | -765,81227 | 0       | 0       | NS | 0 | 0 | 0 | 0 | 0 | 0 | 0 | 0 | 0 | 0 | 0 | 0 | 0 | 0 | 0 | Poly(A)+ RNA export<br>protein          | PF00400.25 | WD40(WD domain, G-beta<br>repeat)                        |
| Supercontig_1.21_MV<br>LG_02612_9sp   | -719,53645 | -719,53609 | 0,00072 | 0,00036 | NS | 0 | 0 | 0 | 0 | 0 | 0 | 0 | 0 | 0 | 0 | 0 | 0 | 0 | 0 | 0 | hypothetical protein                    | PF10358.2  | Eeig1(Oestrogen-responsive<br>protein Fam102A-B)         |
| Supercontig_1.18_MV<br>LG_02362_8sp   | -374,29296 | -374,21561 | 0,1547  | 0,07443 | NS | 0 | 0 | 0 | 0 | 0 | 0 | 0 | 0 | 0 | 0 | 0 | 0 | 0 | 0 | 0 | hypothetical protein                    | NA         | NA                                                       |
| Supercontig_1.1_MVL<br>G_00084_9sp    | -311,46831 | -311,46807 | 0,00048 | 0,00024 | NS | 0 | 0 | 0 | 0 | 0 | 0 | 0 | 0 | 0 | 0 | 0 | 0 | 0 | 0 | 0 | 50S ribosomal protein<br>L19e           | PF01280.13 | Ribosomal_L19e(Ribosomal<br>protein L19e)                |
| Supercontig_1.15_MV<br>LG_02095_8sp   | -429,71155 | -429,71142 | 0,00026 | 0,00013 | NS | 0 | 0 | 0 | 0 | 0 | 0 | 0 | 0 | 0 | 0 | 0 | 0 | 0 | 0 | 0 | ATP synthase F1,<br>gamma subunit       | PF00231.12 | ATP-synt(ATP synthase)                                   |
| Supercontig_1.9_MVL<br>G_01503_8sp    | -509,03025 | -509,03025 | 0       | 0       | NS | 0 | 0 | 0 | 0 | 0 | 0 | 0 | 0 | 0 | 0 | 0 | 0 | 0 | 0 | 0 | hypothetical protein                    | PF05875.5  | aPHC(Alkaline phytoceramide<br>(aPHC))                   |
| Supercontig_1.17_MV<br>LG_02302_8sp   | -280,45163 | -280,45162 | 0       | 0       | NS | 0 | 0 | 0 | 0 | 0 | 0 | 0 | 0 | 0 | 0 | 0 | 0 | 0 | 0 | 0 | hypothetical protein                    | PF02544.9  | Steroid_dh(3-oxo-5-alpha-steroid<br>4-dehydrogenase)     |
| Supercontig_1.2_MVL<br>G_00394_8sp    | -376,13537 | -376,13505 | 0,00064 | 0,00032 | NS | 0 | 0 | 0 | 0 | 0 | 0 | 0 | 0 | 0 | 0 | 0 | 0 | 0 | 0 | 0 | hypothetical protein                    | NA         | NA                                                       |
| Supercontig_1.1_MVL<br>G_00212_8sp    | -1752,355  | -1752,0964 | 0,51708 | 0,22782 | NS | 0 | 0 | 0 | 0 | 0 | 0 | 0 | 0 | 0 | 0 | 0 | 0 | 0 | 0 | 0 | hypothetical protein                    | PF12350.1  | CTK3_C(CTD kinase subunit<br>gamma CTK3 C-terminus)      |
| Supercontig_1.56_MV<br>LG_04768_10sp  | -454,02321 | -452,76691 | 2,5126  | 0,71529 | NS | 0 | 0 | 0 | 0 | 0 | 0 | 0 | 0 | 0 | 0 | 0 | 0 | 0 | 0 | 0 | hypothetical protein                    | PF02230.9  | Abhydrolase_2(Phospholipase/C<br>arboxylesterase)        |
| Supercontig_1.5_MVL<br>G_00959_11sp   | -689,514   | -689,514   | 0       | 0       | NS | 0 | 0 | 0 | 0 | 0 | 0 | 0 | 0 | 0 | 0 | 0 | 0 | 0 | 0 | 0 | hypothetical protein                    | NA         | NA                                                       |
| Supercontig_1.68_MV<br>LG_05262_10sp  | -558,11254 | -558,11254 | 0       | 0       | NS | 0 | 0 | 0 | 0 | 0 | 0 | 0 | 0 | 0 | 0 | 0 | 0 | 0 | 0 | 0 | methionine<br>aminopeptidase 1          | PF00557.17 | Peptidase_M24(Metallopeptidase<br>family M24)            |

|                                      |            |            |         |         |    |   |   |   |   |   |   |   |                                   |            |                                                                |
|--------------------------------------|------------|------------|---------|---------|----|---|---|---|---|---|---|---|-----------------------------------|------------|----------------------------------------------------------------|
| Supercontig_1.47_MV<br>LG_04307_7sp  | -1217,7104 | -1217,7104 | 0       | 0       | NS | 0 | 0 | 0 | 0 | 0 | 0 | 0 | hypothetical protein              | PF00498.19 | FHA(FHA domain)                                                |
| Supercontig_1.23_MV<br>LG_02813_11sp | -716,7097  | -715,19555 | 3,0283  | 0,78    | NS | 0 | 0 | 0 | 0 | 0 | 0 | 0 | CAMK/CAMKL/PASK<br>protein kinase | PF07714.10 | Pkinase_Tyr(Protein tyrosine<br>kinase)                        |
| Supercontig_1.94_MV<br>LG_06005_8sp  | -322,68422 | -322,68415 | 0       | 0       | NS | 0 | 0 | 0 | 0 | 0 | 0 | 0 | GTP-binding protein<br>ypt2       | PF04670.5  | Gtr1_RagA(Gtr1/RagA G protein<br>conserved region)             |
| Supercontig_1.12_MV<br>LG_01805_10sp | -691,35197 | -691,35197 | 0       | 0       | NS | 0 | 0 | 0 | 0 | 0 | 0 | 0 | hypothetical protein              | PF00400.25 | WD40(WD domain, G-beta<br>repeat)                              |
| Supercontig_1.34_MV<br>LG_03528_9sp  | -388,23582 | -388,23573 | 0       | 0       | NS | 0 | 0 | 0 | 0 | 0 | 0 | 0 | ribosome biogenesis<br>protein N  | PF01201.15 | Ribosomal_S8e(Ribosomal<br>protein S8e)                        |
| Supercontig_1.9_MVL<br>G_01528_8sp   | -221,80022 | -221,80017 | 0       | 0       | NS | 0 | 0 | 0 | 0 | 0 | 0 | 0 | hypothetical protein              | TIGR01160  | TIGR01160/SUI1_MOF2:<br>translation initiation factor SUI1)    |
| Supercontig_1.28_MV<br>LG_03175_7sp  | -525,07287 | -525,07287 | 0       | 0       | NS | 0 | 0 | 0 | 0 | 0 | 0 | 0 | hypothetical protein              | NA         | NA                                                             |
| Supercontig_1.8_MVL<br>G_01440_7sp   | -559,07813 | -558,66487 | 0,82652 | 0,33851 | NS | 0 | 0 | 0 | 0 | 0 | 0 | 0 | hypothetical protein              | NA         | NA                                                             |
| Supercontig_1.48_MV<br>LG_04354_7sp  | -712,33317 | -712,33317 | 0       | 0       | NS | 0 | 0 | 0 | 0 | 0 | 0 | 0 | hypothetical protein              | PF00642.17 | zf-CCCH(Zinc finger C-x8-C-x5-<br>C-x3-H type (and similar))   |
| Supercontig_1.51_MV<br>LG_04499_8sp  | -418,52858 | -418,43889 | 0,17938 | 0,08579 | NS | 0 | 0 | 0 | 0 | 0 | 0 | 0 | hypothetical protein              | NA         | NA                                                             |
| Supercontig_1.7_MVL<br>G_01293_10sp  | -562,2908  | -562,23669 | 0,10822 | 0,05267 | NS | 0 | 0 | 0 | 0 | 0 | 0 | 0 | hypothetical protein              | NA         | NA                                                             |
| Supercontig_1.87_MV<br>LG_05872_6sp  | -1190,8807 | -1190,8806 | 0,00038 | 0,00019 | NS | 0 | 0 | 0 | 0 | 0 | 0 | 0 | hypothetical protein              | NA         | NA                                                             |
| Supercontig_1.94_MV<br>LG_06006_7sp  | -336,10226 | -335,84173 | 0,52106 | 0,22936 | NS | 0 | 0 | 0 | 0 | 0 | 0 | 0 | hypothetical protein              | PF03134.12 | TB2_DP1_HVA22(TB2/DP1,<br>HVA22 family)                        |
| Supercontig_1.7_MVL<br>G_01269_10sp  | -394,25101 | -394,24345 | 0,01512 | 0,00753 | NS | 0 | 0 | 0 | 0 | 0 | 0 | 0 | hypothetical protein              | NA         | NA                                                             |
| Supercontig_1.7_MVL<br>G_01226_9sp   | -1003,7306 | -1003,6778 | 0,10558 | 0,05142 | NS | 0 | 0 | 0 | 0 | 0 | 0 | 0 | hypothetical protein              | NA         | NA                                                             |
| Supercontig_1.91_MV<br>LG_05942_6sp  | -752,12518 | -752,125   | 0,00036 | 0,00018 | NS | 0 | 0 | 0 | 0 | 0 | 0 | 0 | replication factor C<br>subunit 3 | PF08542.4  | Rep_fac_C(Replication factor C)                                |
| Supercontig_1.32_MV<br>LG_03403_6sp  | -994,32683 | -994,32646 | 0,00074 | 0,00037 | NS | 0 | 0 | 0 | 0 | 0 | 0 | 0 | hypothetical protein              | PF03328.7  | HpcH_Hpal(HpcH/Hpal<br>aldolase/citrate lyase family)          |
| Supercontig_1.50_MV<br>LG_04483_10sp | -751,66893 | -751,66893 | 0       | 0       | NS | 0 | 0 | 0 | 0 | 0 | 0 | 0 | spermidine synthase               | PF03435.11 | Saccharop_dh(Saccharopine<br>dehydrogenase)                    |
| Supercontig_1.40_MV<br>LG_03921_10sp | -645,54384 | -645,54384 | 0       | 0       | NS | 0 | 0 | 0 | 0 | 0 | 0 | 0 | hypothetical protein              | PF01053.13 | Cys_Met_Meta_PP(Cys/Met<br>metabolism PLP-dependent<br>enzyme) |
| Supercontig_1.30_MV<br>LG_03297_11sp | -592,29837 | -592,29837 | 0       | 0       | NS | 0 | 0 | 0 | 0 | 0 | 0 | 0 | hypothetical protein              | PF09724.2  | DUF2036(Uncharacterized<br>conserved protein (DUF2036))        |
| Supercontig_1.32_MV<br>LG_03400_11sp | -709,40674 | -709,39076 | 0,03196 | 0,01585 | NS | 0 | 0 | 0 | 0 | 0 | 0 | 0 | hypothetical protein              | PF00150.11 | Cellulase(Cellulase (glycosyl<br>hydrolase family 5))          |
| Supercontig_1.155_MV<br>LG_06824_8sp | -406,39937 | -406,39924 | 0,00026 | 0,00013 | NS | 0 | 0 | 0 | 0 | 0 | 0 | 0 | hypothetical protein              | PF00070.20 | Pyr_redox(Pyridine nucleotide-<br>disulphide oxidoreductase)   |
| Supercontig_1.38_MV<br>LG_03810_7sp  | -847,37426 | -847,30009 | 0,14834 | 0,07149 | NS | 0 | 0 | 0 | 0 | 0 | 0 | 0 | dihydroxy-acid<br>dehydratase     | PF00920.14 | ILVD_EDD(Dehydratase family)                                   |
| Supercontig_1.57_MV<br>LG_04826_10sp | -1172,4376 | -1170,9016 | 3,07198 | 0,78476 | NS | 0 | 0 | 0 | 0 | 0 | 0 | 0 | hypothetical protein              | PF00320.20 | GATA(GATA zinc finger)                                         |

|                                      |            |            |         |         |    |   |   |   |   |                                        |            |                                                                               |
|--------------------------------------|------------|------------|---------|---------|----|---|---|---|---|----------------------------------------|------------|-------------------------------------------------------------------------------|
| Supercontig_1.31_MV<br>LG_03346_9sp  | -1234,8768 | -1234,8764 | 0,00092 | 0,00046 | NS | 0 | 0 | 0 | 0 | hypothetical protein                   | PF00564.17 | PB1(PB1 domain)                                                               |
| Supercontig_1.17_MV<br>LG_02314_9sp  | -1133,3791 | -1133,2277 | 0,30278 | 0,14049 | NS | 0 | 0 | 0 | 0 | hypothetical protein                   | PF08580.3  | KAR9(Yeast cortical protein KAR9)                                             |
| Supercontig_1.13_MV<br>LG_01892_12sp | -391,76153 | -391,76153 | 0       | 0       | NS | 0 | 0 | 0 | 0 | hypothetical protein                   | PF00172.11 | Zn_clus(Fungal Zn(2)-Cys(6) binuclear cluster domain)                         |
| Supercontig_1.739_MV<br>LG_07306_8sp | -370,33113 | -370,33113 | 0       | 0       | NS | 0 | 0 | 0 | 0 | hypothetical protein                   | NA         | NA                                                                            |
| Supercontig_1.38_MV<br>LG_03822_10sp | -776,30765 | -775,79508 | 1,02514 | 0,40105 | NS | 0 | 0 | 0 | 0 | hypothetical protein                   | PF00076.15 | RRM_1(RNA recognition motif. (a.k.a. RRM, RBD, or RNP domain))                |
| Supercontig_1.5_MVL<br>G_01005_8sp   | -483,65162 | -483,65162 | 0       | 0       | NS | 0 | 0 | 0 | 0 | hypothetical protein                   | NA         | NA                                                                            |
| Supercontig_1.183_MV<br>LG_07015_7sp | -386,3057  | -385,81813 | 0,97514 | 0,38588 | NS | 0 | 0 | 0 | 0 | hypothetical protein                   | NA         | NA                                                                            |
| Supercontig_1.23_MV<br>LG_02819_11sp | -560,13321 | -560,13321 | 0       | 0       | NS | 0 | 0 | 0 | 0 | hypothetical protein                   | PF12269.1  | zf-CpG_bind_C(CpG binding protein zinc finger C terminal domain)              |
| Supercontig_1.25_MV<br>LG_02958_8sp  | -813,113   | -813,113   | 0       | 0       | NS | 0 | 0 | 0 | 0 | hypothetical protein                   | PF05859.5  | Mis12(Mis12 protein)                                                          |
| Supercontig_1.2_MVL<br>G_00304_10sp  | -473,32342 | -473,15101 | 0,34482 | 0,15837 | NS | 0 | 0 | 0 | 0 | hypothetical protein                   | PF00339.22 | Arrestin_N(Arrestin (or S-antigen), N-terminal domain)                        |
| Supercontig_1.61_MV<br>LG_04976_6sp  | -430,12298 | -428,25241 | 3,74114 | 0,84596 | NS | 0 | 0 | 0 | 0 | ubiquitin-conjugating enzyme E2 8      | PF00179.19 | UQ_con(Ubiquitin-conjugating enzyme)                                          |
| Supercontig_1.4_MVL<br>G_00861_8sp   | -605,86534 | -605,86534 | 0       | 0       | NS | 0 | 0 | 0 | 0 | iron sulfur cluster assembly protein 1 | PF01592.9  | NifU_N(NifU-like N terminal domain)                                           |
| Supercontig_1.52_MV<br>LG_04591_6sp  | -1008,0795 | -1008,0788 | 0,00138 | 0,00069 | NS | 0 | 0 | 0 | 0 | phenylalanine ammonia-lyase            | PF00221.12 | PAL(Phenylalanine and histidine ammonia-lyase)                                |
| Supercontig_1.1_MVL<br>G_00115_7sp   | -756,00728 | -754,68623 | 2,6421  | 0,73315 | NS | 0 | 0 | 0 | 0 | hypothetical protein                   | NA         | NA                                                                            |
| Supercontig_1.3_MVL<br>G_00639_9sp   | -1044,7574 | -1044,7571 | 0,00076 | 0,00038 | NS | 0 | 0 | 0 | 0 | hypothetical protein                   | PF04082.11 | Fungal_trans(Fungal specific transcription factor domain)                     |
| Supercontig_1.59_MV<br>LG_04887_8sp  | -425,53732 | -425,53711 | 0,00042 | 0,00021 | NS | 0 | 0 | 0 | 0 | hypothetical protein                   | NA         | NA                                                                            |
| Supercontig_1.12_MV<br>LG_01868_10sp | -757,16108 | -757,16108 | 0       | 0       | NS | 0 | 0 | 0 | 0 | hypothetical protein                   | PF07732.8  | Cu-oxidase_3(Multicopper oxidase)                                             |
| Supercontig_1.166_MV<br>LG_06918_7sp | -500,8374  | -499,9925  | 1,6898  | 0,5704  | NS | 0 | 0 | 0 | 0 | hypothetical protein                   | NA         | NA                                                                            |
| Supercontig_1.220_MV<br>LG_07158_7sp | -275,70648 | -275,70644 | 0       | 0       | NS | 0 | 0 | 0 | 0 | 50S ribosomal protein L36e             | PF01158.11 | Ribosomal_L36e(Ribosomal protein L36e)                                        |
| Supercontig_1.197_MV<br>LG_07072_9sp | -430,27261 | -430,27261 | 0       | 0       | NS | 0 | 0 | 0 | 0 | hypothetical protein                   | PF00995.16 | Sec1(Sec1 family)                                                             |
| Supercontig_1.5_MVL<br>G_01027_7sp   | -650,46767 | -650,46767 | 0       | 0       | NS | 0 | 0 | 0 | 0 | hypothetical protein                   | NA         | NA                                                                            |
| Supercontig_1.25_MV<br>LG_02931_9sp  | -420,93468 | -420,93456 | 0       | 0       | NS | 0 | 0 | 0 | 0 | 40S ribosomal protein S17              | PF00833.11 | Ribosomal_S17e(Ribosomal S17)                                                 |
| Supercontig_1.61_MV<br>LG_04972_6sp  | -1100,803  | -1100,803  | 0       | 0       | NS | 0 | 0 | 0 | 0 | hypothetical protein                   | PF00400.25 | WD40(WD domain, G-beta repeat)                                                |
| Supercontig_1.112_MV<br>LG_06330_9sp | -846,43429 | -846,43422 | 0       | 0       | NS | 0 | 0 | 0 | 0 | hypothetical protein                   | PF04488.8  | Gly_transf_sug(Glycosyltransferase sugar-binding region containing DXD motif) |

|                                       |            |            |         |         |    |   |   |   |   |   |   |   |   |   |   |   |   |   |   |   |                                 |            |                                                              |
|---------------------------------------|------------|------------|---------|---------|----|---|---|---|---|---|---|---|---|---|---|---|---|---|---|---|---------------------------------|------------|--------------------------------------------------------------|
| Supercontig_1.41_MV<br>LG_04030_10sp  | -484,45438 | -484,45438 | 0       | 0       | NS | 0 | 0 | 0 | 0 | 0 | 0 | 0 | 0 | 0 | 0 | 0 | 0 | 0 | 0 | 0 | hypothetical protein            | NA         | NA                                                           |
| Supercontig_1.32_MV<br>LG_03393_6sp   | -988,99051 | -988,99046 | 0       | 0       | NS | 0 | 0 | 0 | 0 | 0 | 0 | 0 | 0 | 0 | 0 | 0 | 0 | 0 | 0 | 0 | hypothetical protein            | PF07716.8  | bZIP_2(Basic region leucine zipper)                          |
| Supercontig_1.9_MVL<br>G_01553_8sp    | -887,68584 | -887,12894 | 1,1138  | 0,42702 | NS | 0 | 0 | 0 | 0 | 0 | 0 | 0 | 0 | 0 | 0 | 0 | 0 | 0 | 0 | 0 | hypothetical protein            | PF00505.12 | HMG_box(HMG (high mobility group) box)                       |
| Supercontig_1.32_MV<br>LG_03399_6sp   | -695,14933 | -695,14933 | 0       | 0       | NS | 0 | 0 | 0 | 0 | 0 | 0 | 0 | 0 | 0 | 0 | 0 | 0 | 0 | 0 | 0 | hypothetical protein            | NA         | NA                                                           |
| Supercontig_1.100_MV<br>LG_06145_12sp | -1113,7188 | -1113,7188 | 0       | 0       | NS | 0 | 0 | 0 | 0 | 0 | 0 | 0 | 0 | 0 | 0 | 0 | 0 | 0 | 0 | 0 | hypothetical protein            | PF08572.3  | PRP3(pre-mRNA processing factor 3 (PRP3))                    |
| Supercontig_1.61_MV<br>LG_04995_10sp  | -589,11401 | -588,94587 | 0,33628 | 0,15476 | NS | 0 | 0 | 0 | 0 | 0 | 0 | 0 | 0 | 0 | 0 | 0 | 0 | 0 | 0 | 0 | hypothetical protein            | PF03062.12 | MBOAT(MBOAT family)                                          |
| Supercontig_1.9_MVL<br>G_01565_6sp    | -1278,9296 | -1276,6806 | 4,498   | 0,8945  | NS | 0 | 0 | 0 | 0 | 0 | 0 | 0 | 0 | 0 | 0 | 0 | 0 | 0 | 0 | 0 | hypothetical protein            | NA         | NA                                                           |
| Supercontig_1.20_MV<br>LG_02567_9sp   | -630,03062 | -629,86284 | 0,33556 | 0,15446 | NS | 0 | 0 | 0 | 0 | 0 | 0 | 0 | 0 | 0 | 0 | 0 | 0 | 0 | 0 | 0 | hypothetical protein            | PF04564.8  | U-box(U-box domain)                                          |
| Supercontig_1.34_MV<br>LG_03524_9sp   | -602,04372 | -602,04341 | 0,00062 | 0,00031 | NS | 0 | 0 | 0 | 0 | 0 | 0 | 0 | 0 | 0 | 0 | 0 | 0 | 0 | 0 | 0 | SCY1 protein kinase             | PF07714.10 | Pkinase_Tyr(Protein tyrosine kinase)                         |
| Supercontig_1.3_MVL<br>G_00510_10sp   | -558,84639 | -558,84639 | 0       | 0       | NS | 0 | 0 | 0 | 0 | 0 | 0 | 0 | 0 | 0 | 0 | 0 | 0 | 0 | 0 | 0 | hypothetical protein            | NA         | NA                                                           |
| Supercontig_1.11_MV<br>LG_01778_8sp   | -362,91783 | -362,91783 | 0       | 0       | NS | 0 | 0 | 0 | 0 | 0 | 0 | 0 | 0 | 0 | 0 | 0 | 0 | 0 | 0 | 0 | hypothetical protein            | PF00179.19 | UQ_con(Ubiquitin-conjugating enzyme)                         |
| Supercontig_1.87_MV<br>LG_05858_10sp  | -366,76535 | -366,76498 | 0,00074 | 0,00037 | NS | 0 | 0 | 0 | 0 | 0 | 0 | 0 | 0 | 0 | 0 | 0 | 0 | 0 | 0 | 0 | tubulin beta chain              | PF00091.18 | Tubulin(Tubulin/FtsZ family, GTPase domain)                  |
| Supercontig_1.7_MVL<br>G_01353_12sp   | -497,07618 | -497,07615 | 0,00028 | 0,00028 | NS | 0 | 0 | 0 | 0 | 0 | 0 | 0 | 0 | 0 | 0 | 0 | 0 | 0 | 0 | 0 | hypothetical protein            | PF00018.21 | SH3_1(SH3 domain)                                            |
| Supercontig_1.19_MV<br>LG_02463_11sp  | -605,56505 | -604,94518 | 1,23974 | 0,46199 | NS | 0 | 0 | 0 | 0 | 0 | 0 | 0 | 0 | 0 | 0 | 0 | 0 | 0 | 0 | 0 | urease                          | PF00547.11 | Urease_gamma(Urease, gamma subunit)                          |
| Supercontig_1.91_MV<br>LG_05929_10sp  | -316,65453 | -316,34768 | 0,6137  | 0,26424 | NS | 0 | 0 | 0 | 0 | 0 | 0 | 0 | 0 | 0 | 0 | 0 | 0 | 0 | 0 | 0 | serine/threonine protein kinase | PF07714.10 | Pkinase_Tyr(Protein tyrosine kinase)                         |
| Supercontig_1.60_MV<br>LG_04927_9sp   | -525,94573 | -525,94573 | 0       | 0       | NS | 0 | 0 | 0 | 0 | 0 | 0 | 0 | 0 | 0 | 0 | 0 | 0 | 0 | 0 | 0 | hypothetical protein            | PF08653.3  | DASH_Dam1(DASH complex subunit Dam1)                         |
| Supercontig_1.34_MV<br>LG_03530_9sp   | -667,08068 | -666,92461 | 0,31214 | 0,1445  | NS | 0 | 0 | 0 | 0 | 0 | 0 | 0 | 0 | 0 | 0 | 0 | 0 | 0 | 0 | 0 | hypothetical protein            | TIGR00614  | TIGR00614(recQ_fam: ATP-dependent DNA helicase, RecQ family) |
| Supercontig_1.7_MVL<br>G_01290_11sp   | -357,16073 | -356,469   | 1,38346 | 0,49929 | NS | 0 | 0 | 0 | 0 | 0 | 0 | 0 | 0 | 0 | 0 | 0 | 0 | 0 | 0 | 0 | hypothetical protein            | PF00300.15 | PGAM(Phosphoglycerate mutase family)                         |
| Supercontig_1.92_MV<br>LG_05955_11sp  | -546,82064 | -546,82036 | 0,00056 | 0,00028 | NS | 0 | 0 | 0 | 0 | 0 | 0 | 0 | 0 | 0 | 0 | 0 | 0 | 0 | 0 | 0 | CAMK/CAMK1 protein kinase       | PF07714.10 | Pkinase_Tyr(Protein tyrosine kinase)                         |
| Supercontig_1.6_MVL<br>G_01065_8sp    | -299,69763 | -299,69763 | 0       | 0       | NS | 0 | 0 | 0 | 0 | 0 | 0 | 0 | 0 | 0 | 0 | 0 | 0 | 0 | 0 | 0 | hypothetical protein            | NA         | NA                                                           |
| Supercontig_1.3_MVL<br>G_00524_9sp    | -475,90271 | -475,90189 | 0,00164 | 0,00082 | NS | 0 | 0 | 0 | 0 | 0 | 0 | 0 | 0 | 0 | 0 | 0 | 0 | 0 | 0 | 0 | hypothetical protein            | PF00400.25 | WD40(WD domain, G-beta repeat)                               |
| Supercontig_1.13_MV<br>LG_01954_12sp  | -658,73085 | -658,48731 | 0,48708 | 0,21615 | NS | 0 | 0 | 0 | 0 | 0 | 0 | 0 | 0 | 0 | 0 | 0 | 0 | 0 | 0 | 0 | hypothetical protein            | NA         | NA                                                           |
| Supercontig_1.83_MV<br>LG_05741_12sp  | -562,79902 | -561,7595  | 2,07904 | 0,64638 | NS | 0 | 0 | 0 | 0 | 0 | 0 | 0 | 0 | 0 | 0 | 0 | 0 | 0 | 0 | 0 | hypothetical protein            | PF09770.2  | PAT1(Topoisomerase II-associated protein PAT1)               |
| Supercontig_1.2_MVL<br>G_00313_10sp   | -460,62802 | -460,62796 | 0,00012 | 0,00028 | NS | 0 | 0 | 0 | 0 | 0 | 0 | 0 | 0 | 0 | 0 | 0 | 0 | 0 | 0 | 0 | hypothetical protein            | NA         | NA                                                           |
| Supercontig_1.38_MV<br>LG_03795_8sp   | -1680,8178 | -1680,8143 | 0,0071  | 0,00354 | NS | 0 | 0 | 0 | 0 | 0 | 0 | 0 | 0 | 0 | 0 | 0 | 0 | 0 | 0 | 0 | hypothetical protein            | PF01764.18 | Lipase_3(Lipase (class 3))                                   |



|                                       |            |            |         |         |    |   |   |   |   |   |                                                           |            |                                                                         |
|---------------------------------------|------------|------------|---------|---------|----|---|---|---|---|---|-----------------------------------------------------------|------------|-------------------------------------------------------------------------|
| Supercontig_1.15_MV<br>LG_02075_8sp   | -464,15182 | -464,15171 | 0,00022 | 0,00011 | NS | 0 | □ | □ | □ | □ | CMGC/CDK protein kinase                                   | PF07714.10 | Pkinase_Tyr(Protein tyrosine kinase)                                    |
| Supercontig_1.113_MV<br>LG_06353_10sp | -449,6571  | -449,26452 | 0,78516 | 0,32469 | NS | 0 | □ | □ | □ | □ | hypothetical protein                                      | NA         | NA                                                                      |
| Supercontig_1.1_MVL<br>G_00008_12sp   | -455,96496 | -455,96496 | 0       | 0       | NS | 0 | □ | □ | □ | □ | hypothetical protein                                      | PF12537.1  | DUF3735(Protein of unknown function (DUF3735))                          |
| Supercontig_1.77_MV<br>LG_05563_8sp   | -359,67084 | -359,5604  | 0,22088 | 0,10456 | NS | 0 | □ | □ | □ | □ | pre-mRNA branch site protein p14                          | PF00076.15 | RRM_1(RNA recognition motif. (a.k.a. RRM, RBD, or RNP domain))          |
| Supercontig_1.30_MV<br>LG_03275_9sp   | -525,41234 | -521,26245 | 8,29978 | 0,98423 | ** | 0 | □ | □ | □ | □ | hypothetical protein                                      | NA         | NA                                                                      |
| Supercontig_1.9_MVL<br>G_01509_10sp   | -654,11285 | -653,01583 | 2,19404 | 0,66614 | NS | 0 | □ | □ | □ | □ | hypothetical protein                                      | PF01412.11 | ArfGap(Putative GTPase activating protein for Arf)                      |
| Supercontig_1.6_MVL<br>G_01207_8sp    | -480,66727 | -480,66727 | 0       | 0       | NS | 0 | □ | □ | □ | □ | actin-like protein 2/3 complex subunit 3                  | PF04062.7  | P21-Arc(ARP2/3 complex ARPC3 (21 kDa) subunit)                          |
| Supercontig_1.29_MV<br>LG_03231_9sp   | -324,75    | -324,74975 | 0,0005  | 0,00025 | NS | 0 | □ | □ | □ | □ | hypothetical protein                                      | NA         | NA                                                                      |
| Supercontig_1.111_MV<br>LG_06306_10sp | -654,3831  | -652,66175 | 3,4427  | 0,82118 | NS | 0 | □ | □ | □ | □ | hypothetical protein                                      | NA         | NA                                                                      |
| Supercontig_1.20_MV<br>LG_02520_8sp   | -544,44923 | -544,44923 | 0       | 0       | NS | 0 | □ | □ | □ | □ | hypothetical protein                                      | NA         | NA                                                                      |
| Supercontig_1.39_MV<br>LG_03866_10sp  | -396,71843 | -396,6336  | 0,16966 | 0,08133 | NS | 0 | □ | □ | □ | □ | hypothetical protein                                      | PF07896.5  | DUF1674(Protein of unknown function (DUF1674))                          |
| Supercontig_1.98_MV<br>LG_06083_9sp   | -412,82965 | -412,82965 | 0       | 0       | NS | 0 | □ | □ | □ | □ | hypothetical protein                                      | PF00293.21 | NUDIX(NUDIX domain)                                                     |
| Supercontig_1.191_MV<br>LG_07046_6sp  | -714,77422 | -714,77411 | 0,00022 | 0,00011 | NS | 0 | □ | □ | □ | □ | V-type H <sup>+</sup> -transporting ATPase 54 kDa subunit | PF03224.7  | V-ATPase_H_N(V-ATPase subunit H)                                        |
| Supercontig_1.59_MV<br>LG_04918_6sp   | -1206,8834 | -1206,8834 | 0       | 0       | NS | 0 | □ | □ | □ | □ | hypothetical protein                                      | PF01424.15 | R3H(R3H domain)                                                         |
| Supercontig_1.13_MV<br>LG_01924_8sp   | -544,38755 | -542,61831 | 3,53848 | 0,82954 | NS | 0 | □ | □ | □ | □ | hypothetical protein                                      | PF00097.18 | zf-C3HC4(Zinc finger, C3HC4 type (RING finger))                         |
| Supercontig_1.46_MV<br>LG_04294_8sp   | -751,86254 | -751,86254 | 0       | 0       | NS | 0 | □ | □ | □ | □ | lanosterol synthase                                       | PF00432.14 | Prenyltrans(Prenyltransferase and squalene oxidase repeat)              |
| Supercontig_1.67_MV<br>LG_05226_7sp   | -438,6659  | -437,09823 | 3,13534 | 0,79147 | NS | 0 | □ | □ | □ | □ | hypothetical protein                                      | PF00153.20 | Mito_carr(Mitochondrial carrier protein)                                |
| Supercontig_1.19_MV<br>LG_02516_8sp   | -663,10618 | -663,10618 | 0       | 0       | NS | 0 | □ | □ | □ | □ | hypothetical protein                                      | PF00160.14 | Pro_isomerase(Cyclophilin type peptidyl-prolyl cis-trans isomerase/CLD) |
| Supercontig_1.112_MV<br>LG_06324_10sp | -688,16215 | -688,16215 | 0       | 0       | NS | 0 | □ | □ | □ | □ | hypothetical protein                                      | NA         | NA                                                                      |
| Supercontig_1.38_MV<br>LG_03807_8sp   | -1240,9628 | -1240,0958 | 1,73398 | 0,57979 | NS | 0 | □ | □ | □ | □ | hypothetical protein                                      | PF00176.16 | SNF2_N(SNF2 family N-terminal domain)                                   |
| Supercontig_1.12_MV<br>LG_01871_6sp   | -313,99955 | -313,99955 | 0       | 0       | NS | 0 | □ | □ | □ | □ | hypothetical protein                                      | NA         | NA                                                                      |
| Supercontig_1.75_MV<br>LG_05499_10sp  | -834,34342 | -834,34342 | 0       | 0       | NS | 0 | □ | □ | □ | □ | hypothetical protein                                      | PF00400.25 | WD40(WD domain, G-beta repeat)                                          |
| Supercontig_1.57_MV<br>LG_04830_8sp   | -1358,0354 | -1358,0354 | 0       | 0       | NS | 0 | □ | □ | □ | □ | VPS15 protein kinase                                      | PF07714.10 | Pkinase_Tyr(Protein tyrosine kinase)                                    |
| Supercontig_1.5_MVL<br>G_01039_11sp   | -487,28069 | -486,24762 | 2,06614 | 0,64409 | NS | 0 | □ | □ | □ | □ | hypothetical protein                                      | NA         | NA                                                                      |

|                                       |            |            |         |         |    |   |  |  |  |                                        |            |                                                                             |
|---------------------------------------|------------|------------|---------|---------|----|---|--|--|--|----------------------------------------|------------|-----------------------------------------------------------------------------|
| Supercontig_1.117_MV<br>LG_06387_10sp | -564,99222 | -564,81893 | 0,34658 | 0,15911 | NS | 0 |  |  |  | hypothetical protein                   | PF00383.15 | dCMP_cyt_deam_1(Cytidine and deoxycytidylate deaminase zinc-binding region) |
| Supercontig_1.123_MV<br>LG_06472_6sp  | -545,96258 | -545,96258 | 0       | 0       | NS | 0 |  |  |  | dolichol-phosphate mannosyltransferase | PF00535.19 | Glycos_transf_2(Glycosyl transferase family 2)                              |
| Supercontig_1.26_MV<br>LG_03032_9sp   | -376,02406 | -376,02406 | 0       | 0       | NS | 0 |  |  |  | hypothetical protein                   | NA         | NA                                                                          |
| Supercontig_1.14_MV<br>LG_01984_9sp   | -280,77987 | -280,77981 | 0,00012 | 0,00028 | NS | 0 |  |  |  | hypothetical protein                   | PF00887.12 | ACBP(Acyl CoA binding protein)                                              |
| Supercontig_1.64_MV<br>LG_05118_12sp  | -700,51378 | -700,36222 | 0,30312 | 0,14063 | NS | 0 |  |  |  | hypothetical protein                   | PF00018.21 | SH3_1(SH3 domain)                                                           |
| Supercontig_1.143_MV<br>LG_06723_11sp | -646,21891 | -643,12085 | 6,19612 | 0,95486 | ** | 0 |  |  |  | hypothetical protein                   | PF00884.16 | Sulfatase(Sulfatase)                                                        |
| Supercontig_1.53_MV<br>LG_04595_11sp  | -537,39367 | -534,13003 | 6,52728 | 0,96175 | ** | 0 |  |  |  | hypothetical protein                   | NA         | NA                                                                          |
| Supercontig_1.66_MV<br>LG_05180_10sp  | -380,39179 | -380,05643 | 0,67072 | 0,28492 | NS | 0 |  |  |  | hypothetical protein                   | PF04824.9  | Rad21_Rec8(Conserved region of Rad21 / Rec8 like protein)                   |
| Supercontig_1.164_MV<br>LG_06896_8sp  | -866,67233 | -866,67233 | 0       | 0       | NS | 0 |  |  |  | hypothetical protein                   | PF00400.25 | WD40(WD domain, G-beta repeat)                                              |
| Supercontig_1.120_MV<br>LG_06427_8sp  | -312,69608 | -311,92798 | 1,5362  | 0,53611 | NS | 0 |  |  |  | hypothetical protein                   | PF05773.15 | RWD(RWD domain)                                                             |
| Supercontig_1.8_MVL<br>G_01367_6sp    | -287,2976  | -286,93252 | 0,73016 | 0,30586 | NS | 0 |  |  |  | hypothetical protein                   | PF00501.21 | AMP-binding(AMP-binding enzyme)                                             |
| Supercontig_1.5_MVL<br>G_00947_10sp   | -785,50246 | -784,47271 | 2,0595  | 0,6429  | NS | 0 |  |  |  | hypothetical protein                   | PF00856.21 | SET(SET domain)                                                             |
| Supercontig_1.62_MV<br>LG_05004_10sp  | -539,36928 | -539,36928 | 0       | 0       | NS | 0 |  |  |  | hypothetical protein                   | PF01590.19 | GAF(GAF domain)                                                             |
| Supercontig_1.12_MV<br>LG_01831_10sp  | -375,46659 | -374,98004 | 0,9731  | 0,38526 | NS | 0 |  |  |  | hypothetical protein                   | NA         | NA                                                                          |
| Supercontig_1.10_MV<br>LG_01664_8sp   | -552,84884 | -552,50807 | 0,68154 | 0,28878 | NS | 0 |  |  |  | hypothetical protein                   | PF00385.17 | Chromo('chromo' (CHR)matin Organisation Modifier) domain)                   |
| Supercontig_1.16_MV<br>LG_02177_9sp   | -700,43783 | -700,1899  | 0,49586 | 0,21959 | NS | 0 |  |  |  | hypothetical protein                   | PF03981.5  | Ubiq_cyt_C_chap(Ubiquinol-cytochrome C chaperone)                           |
| Supercontig_1.49_MV<br>LG_04440_10sp  | -679,57363 | -679,15169 | 0,84388 | 0,34423 | NS | 0 |  |  |  | hypothetical protein                   | PF00083.17 | Sugar_tr(Sugar (and other) transporter)                                     |
| Supercontig_1.6_MVL<br>G_01083_6sp    | -891,81873 | -891,81871 | 0,00028 | 0,00028 | NS | 0 |  |  |  | hypothetical protein                   | PF00560.26 | LRR_1(Leucine Rich Repeat)                                                  |
| Supercontig_1.2_MVL<br>G_00343_7sp    | -477,12434 | -476,25497 | 1,73874 | 0,58078 | NS | 0 |  |  |  | hypothetical protein                   | PF00505.12 | HMG_box(HMG (high mobility group) box)                                      |
| Supercontig_1.1_MVL<br>G_00147_7sp    | -749,75569 | -749,77928 | 0       | 0       | NS | 0 |  |  |  | hypothetical protein                   | PF02902.12 | Peptidase_C48(Ulp1 protease family, C-terminal catalytic domain)            |
| Supercontig_1.9_MVL<br>G_01564_8sp    | -1090,5003 | -1090,5003 | 0       | 0       | NS | 0 |  |  |  | hypothetical protein                   | NA         | NA                                                                          |
| Supercontig_1.94_MV<br>LG_05993_10sp  | -786,47422 | -784,65312 | 3,6422  | 0,83815 | NS | 0 |  |  |  | hypothetical protein                   | NA         | NA                                                                          |

|                                       |            |            |         |         |    |   |   |   |   |   |   |   |   |   |   |   |   |   |   |   |                         |            |                                                                |                                                 |                                              |                                         |
|---------------------------------------|------------|------------|---------|---------|----|---|---|---|---|---|---|---|---|---|---|---|---|---|---|---|-------------------------|------------|----------------------------------------------------------------|-------------------------------------------------|----------------------------------------------|-----------------------------------------|
| Supercontig_1.3_MVL<br>G_00596_11sp   | -374,63179 | -374,63179 | 0       | 0       | NS | 0 | 0 | 0 | 0 | 0 | 0 | 0 | 0 | 0 | 0 | 0 | 0 | 0 | 0 | 0 | hypothetical protein    | PF00076.15 | RRM_1(RNA recognition motif. (a.k.a. RRM, RBD, or RNP domain)) |                                                 |                                              |                                         |
| Supercontig_1.36_MV<br>LG_03671_7sp   | -598,61374 | -598,61355 | 0,00038 | 0,00019 | NS | 0 | 0 | 0 | 0 | 0 | 0 | 0 | 0 | 0 | 0 | 0 | 0 | 0 | 0 | 0 | UDP-glucose 4-epimerase | PF07993.5  | NAD_binding_4(Male sterility protein)                          |                                                 |                                              |                                         |
| Supercontig_1.11_MV<br>LG_01698_9sp   | -371,41242 | -371,41242 | 0       | 0       | NS | 0 | 0 | 0 | 0 | 0 | 0 | 0 | 0 | 0 | 0 | 0 | 0 | 0 | 0 | 0 | 0                       | 0          | tRNA-synt_1g(tRNA synthetases class I (M))                     |                                                 |                                              |                                         |
| Supercontig_1.1_MVL<br>G_00030_8sp    | -422,29821 | -422,29821 | 0       | 0       | NS | 0 | 0 | 0 | 0 | 0 | 0 | 0 | 0 | 0 | 0 | 0 | 0 | 0 | 0 | 0 | 0                       | 0          | Aldo_ket_red(Aldo/keto reductase family)                       |                                                 |                                              |                                         |
| Supercontig_1.11_MV<br>LG_01779_9sp   | -424,77208 | -424,7716  | 0,00096 | 0,00048 | NS | 0 | 0 | 0 | 0 | 0 | 0 | 0 | 0 | 0 | 0 | 0 | 0 | 0 | 0 | 0 | 0                       | 0          | AAA_2(AAA domain (Cdc48 subfamily))                            |                                                 |                                              |                                         |
| Supercontig_1.32_MV<br>LG_03408_6sp   | -1011,3785 | -1011,3785 | 0       | 0       | NS | 0 | 0 | 0 | 0 | 0 | 0 | 0 | 0 | 0 | 0 | 0 | 0 | 0 | 0 | 0 | 0                       | 0          | DNA_po_E_B(DNA polymerase alpha/epsilon subunit B)             |                                                 |                                              |                                         |
| Supercontig_1.22_MV<br>LG_02742_10sp  | -1015,0575 | -1013,6984 | 2,71808 | 0,74309 | NS | 0 | 0 | 0 | 0 | 0 | 0 | 0 | 0 | 0 | 0 | 0 | 0 | 0 | 0 | 0 | 0                       | 0          | PUB(PUB domain)                                                |                                                 |                                              |                                         |
| Supercontig_1.25_MV<br>LG_02935_10sp  | -429,38532 | -429,38505 | 0,00054 | 0,00027 | NS | 0 | 0 | 0 | 0 | 0 | 0 | 0 | 0 | 0 | 0 | 0 | 0 | 0 | 0 | 0 | 0                       | 0          | PAP2(PAP2 superfamily)                                         |                                                 |                                              |                                         |
| Supercontig_1.160_MV<br>LG_06859_11sp | -739,87622 | -739,87622 | 0       | 0       | NS | 0 | 0 | 0 | 0 | 0 | 0 | 0 | 0 | 0 | 0 | 0 | 0 | 0 | 0 | 0 | 0                       | 0          | MIF4G(MIF4G domain)                                            |                                                 |                                              |                                         |
| Supercontig_1.3_MVL<br>G_00624_9sp    | -280,49636 | -280,4962  | 0,00032 | 0,00016 | NS | 0 | 0 | 0 | 0 | 0 | 0 | 0 | 0 | 0 | 0 | 0 | 0 | 0 | 0 | 0 | 0                       | 0          | large subunit ribosomal protein L26e                           |                                                 |                                              |                                         |
| Supercontig_1.85_MV<br>LG_05787_10sp  | -868,72825 | -868,72825 | 0       | 0       | NS | 0 | 0 | 0 | 0 | 0 | 0 | 0 | 0 | 0 | 0 | 0 | 0 | 0 | 0 | 0 | 0                       | 0          | TIGR01080(rplX_A_E: ribosomal protein L24)                     |                                                 |                                              |                                         |
| Supercontig_1.2_MVL<br>G_00300_6sp    | -785,5281  | -785,52806 | 0,00028 | 0,00028 | NS | 0 | 0 | 0 | 0 | 0 | 0 | 0 | 0 | 0 | 0 | 0 | 0 | 0 | 0 | 0 | 0                       | 0          | amidophosphoribosyltransferase                                 |                                                 |                                              |                                         |
| Supercontig_1.8_MVL<br>G_01371_10sp   | -875,36004 | -875,35974 | 0,0006  | 0,0003  | NS | 0 | 0 | 0 | 0 | 0 | 0 | 0 | 0 | 0 | 0 | 0 | 0 | 0 | 0 | 0 | 0                       | 0          | PF00156.20                                                     | Pribosyltran(Phosphoribosyl transferase domain) |                                              |                                         |
| Supercontig_1.60_MV<br>LG_04938_9sp   | -1020,9801 | -1018,9128 | 4,13464 | 0,87348 | NS | 0 | 0 | 0 | 0 | 0 | 0 | 0 | 0 | 0 | 0 | 0 | 0 | 0 | 0 | 0 | 0                       | 0          | 0                                                              | DUF171(Uncharacterized ACR, COG2106)            |                                              |                                         |
| Supercontig_1.45_MV<br>LG_04231_10sp  | -735,46687 | -735,46687 | 0       | 0       | NS | 0 | 0 | 0 | 0 | 0 | 0 | 0 | 0 | 0 | 0 | 0 | 0 | 0 | 0 | 0 | 0                       | 0          | 0                                                              | PF02598.10                                      | Tup_N(Tup N-terminal)                        |                                         |
| Supercontig_1.1_MVL<br>G_00014_9sp    | -594,82147 | -594,7524  | 0,13814 | 0,06674 | NS | 0 | 0 | 0 | 0 | 0 | 0 | 0 | 0 | 0 | 0 | 0 | 0 | 0 | 0 | 0 | 0                       | 0          | 0                                                              | hypothetical protein                            |                                              |                                         |
| Supercontig_1.38_MV<br>LG_03766_8sp   | -442,23406 | -442,23405 | 0,00028 | 0,00028 | NS | 0 | 0 | 0 | 0 | 0 | 0 | 0 | 0 | 0 | 0 | 0 | 0 | 0 | 0 | 0 | 0                       | 0          | 0                                                              | PF08581.3                                       | NA                                           |                                         |
| Supercontig_1.21_MV<br>LG_02653_8sp   | -1626,8601 | -1625,6121 | 2,49604 | 0,71293 | NS | 0 | 0 | 0 | 0 | 0 | 0 | 0 | 0 | 0 | 0 | 0 | 0 | 0 | 0 | 0 | 0                       | 0          | 0                                                              | NA                                              |                                              |                                         |
| Supercontig_1.9_MVL<br>G_01513_10sp   | -577,13178 | -577,13178 | 0       | 0       | NS | 0 | 0 | 0 | 0 | 0 | 0 | 0 | 0 | 0 | 0 | 0 | 0 | 0 | 0 | 0 | 0                       | 0          | 0                                                              | hypothetical protein                            |                                              |                                         |
| Supercontig_1.44_MV<br>LG_04165_10sp  | -706,10444 | -706,10444 | 0       | 0       | NS | 0 | 0 | 0 | 0 | 0 | 0 | 0 | 0 | 0 | 0 | 0 | 0 | 0 | 0 | 0 | 0                       | 0          | 0                                                              | PF01532.13                                      | Glyco_hydro_47(Glycosyl hydrolase family 47) |                                         |
| Supercontig_1.107_MV<br>LG_06242_9sp  | -601,84703 | -601,84703 | 0       | 0       | NS | 0 | 0 | 0 | 0 | 0 | 0 | 0 | 0 | 0 | 0 | 0 | 0 | 0 | 0 | 0 | 0                       | 0          | 0                                                              | DUF2416(Protein of unknown function (DUF2416))  |                                              |                                         |
| Supercontig_1.4_MVL<br>G_00865_11sp   | -455,7187  | -455,7186  | 0,0002  | 0,00028 | NS | 0 | 0 | 0 | 0 | 0 | 0 | 0 | 0 | 0 | 0 | 0 | 0 | 0 | 0 | 0 | 0                       | 0          | 0                                                              | PF10315.2                                       | TBC(TBC domain)                              |                                         |
| Supercontig_1.19_MV<br>LG_02457_10sp  | -438,58977 | -438,58977 | 0       | 0       | NS | 0 | 0 | 0 | 0 | 0 | 0 | 0 | 0 | 0 | 0 | 0 | 0 | 0 | 0 | 0 | 0                       | 0          | 0                                                              | PF00566.11                                      | lon_trans(lon transport protein)             |                                         |
| Supercontig_1.97_MV<br>LG_06067_11sp  | -410,72411 | -410,7239  | 0,00042 | 0,00021 | NS | 0 | 0 | 0 | 0 | 0 | 0 | 0 | 0 | 0 | 0 | 0 | 0 | 0 | 0 | 0 | 0                       | 0          | 0                                                              | PF00520.24                                      | RhoGAP(RhoGAP domain)                        |                                         |
|                                       |            |            |         |         |    |   |   |   |   |   |   |   |   |   |   |   |   |   |   |   |                         |            |                                                                |                                                 | hypothetical protein                         |                                         |
|                                       |            |            |         |         |    |   |   |   |   |   |   |   |   |   |   |   |   |   |   |   |                         |            |                                                                |                                                 | PF00620.20                                   | Bromodomain(Bromodomain)                |
|                                       |            |            |         |         |    |   |   |   |   |   |   |   |   |   |   |   |   |   |   |   |                         |            |                                                                |                                                 | PF00439.18                                   | Sugar_tr(Sugar (and other) transporter) |
|                                       |            |            |         |         |    |   |   |   |   |   |   |   |   |   |   |   |   |   |   |   |                         |            |                                                                |                                                 | PF00083.17                                   | Sugar_tr(Sugar (and other) transporter) |
|                                       |            |            |         |         |    |   |   |   |   |   |   |   |   |   |   |   |   |   |   |   |                         |            |                                                                |                                                 | PF00083.17                                   | protein phosphatase                     |
|                                       |            |            |         |         |    |   |   |   |   |   |   |   |   |   |   |   |   |   |   |   |                         |            |                                                                |                                                 | PF00481.14                                   | PP2C(Protein phosphatase 2C)            |



|                                      |            |            |         |         |    |   |  |  |  |  |                      |            |                                                              |
|--------------------------------------|------------|------------|---------|---------|----|---|--|--|--|--|----------------------|------------|--------------------------------------------------------------|
| Supercontig_1.14_MV<br>LG_02053_6sp  | -504,07566 | -504,07566 | 0       | 0       | NS | 0 |  |  |  |  | hypothetical protein | PF08544.6  | GHMP_kinases_C(GHMP kinases C terminal)                      |
| Supercontig_1.8_MVL<br>G_01461_9sp   | -2365,8629 | -2362,2364 | 7,25282 | 0,97339 | ** | 0 |  |  |  |  | hypothetical protein | NA         | NA                                                           |
| Supercontig_1.47_MV<br>LG_04321_10sp | -408,37786 | -407,47651 | 1,8027  | 0,59398 | NS | 0 |  |  |  |  | hypothetical protein | NA         | NA                                                           |
| Supercontig_1.16_MV<br>LG_02163_8sp  | -585,65256 | -584,46107 | 2,38298 | 0,69623 | NS | 0 |  |  |  |  | hypothetical protein | NA         | NA                                                           |
| Supercontig_1.2_MVL<br>G_00445_6sp   | -693,88977 | -693,88976 | 0,00028 | 0,00028 | NS | 0 |  |  |  |  | hypothetical protein | PF00102.20 | Y_phosphatase(Protein-tyrosine phosphatase)                  |
| Supercontig_1.76_MV<br>LG_05509_8sp  | -511,84345 | -510,91279 | 1,86132 | 0,60571 | NS | 0 |  |  |  |  | hypothetical protein | NA         | NA                                                           |
| Supercontig_1.227_MV<br>LG_07181_9sp | -541,54782 | -540,48158 | 2,13248 | 0,6557  | NS | 0 |  |  |  |  | hypothetical protein | PF03501.8  | S10_pectin(Plectin/S10 domain)                               |
| Supercontig_1.1_MVL<br>G_00194_8sp   | -331,59859 | -331,59859 | 0       | 0       | NS | 0 |  |  |  |  | hypothetical protein | PF04716.7  | ETC_C1_NDUFA5(ETC complex I subunit conserved region)        |
| Supercontig_1.69_MV<br>LG_05297_10sp | -493,06021 | -492,67269 | 0,77504 | 0,32126 | NS | 0 |  |  |  |  | hypothetical protein | TIGR00706  | TIGR00706(SppA_dom: signal peptide peptidase SppA, 36K type) |
| Supercontig_1.2_MVL<br>G_00324_6sp   | -481,15583 | -479,3077  | 3,69626 | 0,84247 | NS | 0 |  |  |  |  | hypothetical protein | TIGR00233  | TIGR00233(trpS: tryptophan--tRNA ligase)                     |
| Supercontig_1.24_MV<br>LG_02894_7sp  | -561,12268 | -561,12268 | 0       | 0       | NS | 0 |  |  |  |  | hypothetical protein | NA         | NA                                                           |
| Supercontig_1.55_MV<br>LG_04721_9sp  | -526,23198 | -526,23176 | 0,00044 | 0,00022 | NS | 0 |  |  |  |  | hypothetical protein | PF01217.13 | Clat_adaptor_s(Clathrin adaptor complex small chain)         |
| Supercontig_1.7_MVL<br>G_01301_6sp   | -802,39262 | -801,67104 | 1,44316 | 0,51402 | NS | 0 |  |  |  |  | hypothetical protein | NA         | NA                                                           |
| Supercontig_1.17_MV<br>LG_02281_10sp | -555,03823 | -555,03029 | 0,01588 | 0,00791 | NS | 0 |  |  |  |  | hypothetical protein | PF00083.17 | Sugar_tr(Sugar (and other) transporter)                      |
| Supercontig_1.25_MV<br>LG_02942_6sp  | -1216,2918 | -1216,2478 | 0,08794 | 0,04302 | NS | 0 |  |  |  |  | hypothetical protein | PF03452.7  | Anp1(Anp1)                                                   |
| Supercontig_1.140_MV<br>LG_06677_6sp | -352,21362 | -352,21362 | 0       | 0       | NS | 0 |  |  |  |  | hypothetical protein | NA         | NA                                                           |
| Supercontig_1.49_MV<br>LG_04416_8sp  | -687,10488 | -684,41654 | 5,37668 | 0,93201 | *  | 0 |  |  |  |  | hypothetical protein | PF00026.16 | Asp(Eukaryotic aspartyl protease)                            |
| Supercontig_1.6_MVL<br>G_01204_9sp   | -1019,0667 | -1019,0667 | 0       | 0       | NS | 0 |  |  |  |  | hypothetical protein | NA         | NA                                                           |
| Supercontig_1.17_MV<br>LG_02282_8sp  | -968,26168 | -968,25073 | 0,0219  | 0,01089 | NS | 0 |  |  |  |  | hypothetical protein | PF02668.9  | TauD(Taurine catabolism dioxygenase TauD, TfdA family)       |
| Supercontig_1.22_MV<br>LG_02691_6sp  | -885,46428 | -885,46428 | 0       | 0       | NS | 0 |  |  |  |  | hypothetical protein | TIGR00577  | TIGR00577(fpg: formamidopyrimidine-DNA glycosylase)          |
| Supercontig_1.1_MVL<br>G_00145_8sp   | -620,51537 | -620,51537 | 0       | 0       | NS | 0 |  |  |  |  | hypothetical protein | PF01151.11 | ELO(GNS1/SUR4 family)                                        |
| Supercontig_1.39_MV<br>LG_03840_7sp  | -699,6123  | -698,06697 | 3,09066 | 0,78676 | NS | 0 |  |  |  |  | hypothetical protein | NA         | NA                                                           |
| Supercontig_1.12_MV<br>LG_01842_6sp  | -1064,09   | -1064,09   | 0       | 0       | NS | 0 |  |  |  |  | RuvB-like helicase 1 | PF05496.5  | RuvB_N(Holliday junction DNA helicase ruvB N-terminus)       |
| Supercontig_1.29_MV<br>LG_03221_10sp | -1402,7618 | -1400,6022 | 4,31916 | 0,88463 | NS | 0 |  |  |  |  | hypothetical protein | NA         | NA                                                           |

|                                      |            |            |         |         |    |   |   |   |   |                                      |            |                                                                            |
|--------------------------------------|------------|------------|---------|---------|----|---|---|---|---|--------------------------------------|------------|----------------------------------------------------------------------------|
| Supercontig_1.1_MVL<br>G_00070_9sp   | -766,04116 | -765,65067 | 0,78098 | 0,32327 | NS | 0 | 0 | 0 | 0 | hypothetical protein                 | TIGR00094  | TIGR00094(tRNA_TruD_broad:<br>tRNA pseudouridine synthase,<br>TruD family) |
| Supercontig_1.8_MVL<br>G_01468_9sp   | -1497,2001 | -1497,2001 | 0       | 0       | NS | 0 | 0 | 0 | 0 | hypothetical protein                 | NA         | NA                                                                         |
| Supercontig_1.98_MV<br>LG_06097_10sp | -841,71862 | -841,70026 | 0,03672 | 0,01819 | NS | 0 | 0 | 0 | 0 | pre-mRNA-splicing<br>factor CLF1     | PF05843.7  | Suf(Suppressor of forked protein<br>(Suf))                                 |
| Supercontig_1.5_MVL<br>G_00941_9sp   | -1129,8976 | -1129,8976 | 0       | 0       | NS | 0 | 0 | 0 | 0 | hypothetical protein                 | PF04615.6  | Utp14(Utp14 protein)                                                       |
| Supercontig_1.53_MV<br>LG_04597_7sp  | -375,03805 | -374,26554 | 1,54502 | 0,53815 | NS | 0 | 0 | 0 | 0 | hypothetical protein                 | PF04117.5  | Mpv17_PMP22(Mpv17 / PMP22<br>family)                                       |
| Supercontig_1.140_MV<br>LG_06688_7sp | -700,5476  | -700,5476  | 0       | 0       | NS | 0 | 0 | 0 | 0 | hypothetical protein                 | NA         | NA                                                                         |
| Supercontig_1.24_MV<br>LG_02837_8sp  | -651,26307 | -651,26307 | 0       | 0       | NS | 0 | 0 | 0 | 0 | hypothetical protein                 | NA         | NA                                                                         |
| Supercontig_1.26_MV<br>LG_02992_11sp | -436,27377 | -436,10998 | 0,32758 | 0,15108 | NS | 0 | 0 | 0 | 0 | hypothetical protein                 | NA         | NA                                                                         |
| Supercontig_1.46_MV<br>LG_04241_11sp | -520,26761 | -520,26761 | 0       | 0       | NS | 0 | 0 | 0 | 0 | hypothetical protein                 | PF05730.4  | CFEM(CFEM domain)                                                          |
| Supercontig_1.1_MVL<br>G_00221_10sp  | -805,93479 | -805,85434 | 0,1609  | 0,0773  | NS | 0 | 0 | 0 | 0 | hypothetical protein                 | PF00083.17 | Sugar_tr(Sugar (and other)<br>transporter)                                 |
| Supercontig_1.58_MV<br>LG_04869_10sp | -501,76107 | -501,29854 | 0,92506 | 0,37031 | NS | 0 | 0 | 0 | 0 | hypothetical protein                 | NA         | NA                                                                         |
| Supercontig_1.42_MV<br>LG_04091_11sp | -452,08431 | -452,08431 | 0       | 0       | NS | 0 | 0 | 0 | 0 | hypothetical protein                 | PF08241.5  | Methyltransf_11(Methyltransfera<br>se domain)                              |
| Supercontig_1.38_MV<br>LG_03804_8sp  | -526,82123 | -526,82119 | 0,00028 | 0,00028 | NS | 0 | 0 | 0 | 0 | citrate synthase                     | PF00285.14 | Citrate_synt(Citrate synthase)                                             |
| Supercontig_1.10_MV<br>LG_01629_9sp  | -328,40711 | -328,82828 | 0       | 0       | NS | 0 | 0 | 0 | 0 | histone                              | PF00125.17 | Histone(Core histone<br>H2A/H2B/H3/H4)                                     |
| Supercontig_1.24_MV<br>LG_02846_9sp  | -1502,4425 | -1501,7892 | 1,30674 | 0,47971 | NS | 0 | 0 | 0 | 0 | hypothetical protein                 | PF00454.20 | PI3_PI4_kinase(Phosphatidyli<br>sitol 3- and 4-kinase)                     |
| Supercontig_1.26_MV<br>LG_03056_11sp | -596,04052 | -596,04052 | 0       | 0       | NS | 0 | 0 | 0 | 0 | CMGC/DYRK/PRP4<br>protein kinase     | PF07714.10 | Pkinase_Tyr(Protein tyrosine<br>kinase)                                    |
| Supercontig_1.31_MV<br>LG_03342_7sp  | -859,0676  | -859,0676  | 0       | 0       | NS | 0 | 0 | 0 | 0 | hypothetical protein                 | PF01267.10 | F-actin_cap_A(F-actin capping<br>protein alpha subunit)                    |
| Supercontig_1.81_MV<br>LG_05674_6sp  | -677,80448 | -677,56508 | 0,4788  | 0,2129  | NS | 0 | 0 | 0 | 0 | hypothetical protein                 | PF01650.11 | Peptidase_C13(Peptidase C13<br>family)                                     |
| Supercontig_1.65_MV<br>LG_05154_8sp  | -350,25907 | -350,2589  | 0,00034 | 0,00017 | NS | 0 | 0 | 0 | 0 | T-complex protein 1<br>subunit alpha | TIGR02340  | TIGR02340(chap_CCT_alpha: T-<br>complex protein 1, alpha subunit)          |
| Supercontig_1.1_MVL<br>G_00126_8sp   | -711,32831 | -711,32823 | 0,00016 | 0,00028 | NS | 0 | 0 | 0 | 0 | hypothetical protein                 | NA         | NA                                                                         |
| Supercontig_1.17_MV<br>LG_02344_7sp  | -290,28077 | -289,8706  | 0,82034 | 0,33646 | NS | 0 | 0 | 0 | 0 | hypothetical protein                 | PF03901.10 | Glyco_transf_22(Alg9-like<br>mannosyltransferase family)                   |
| Supercontig_1.2_MVL<br>G_00376_10sp  | -457,33433 | -457,33433 | 0       | 0       | NS | 0 | 0 | 0 | 0 | hypothetical protein                 | PF04051.9  | TRAPP(Transport protein partic<br>le (TRAPP) component)                    |
| Supercontig_1.36_MV<br>LG_03636_7sp  | -527,55663 | -527,5565  | 0,00026 | 0,00013 | NS | 0 | 0 | 0 | 0 | hypothetical protein                 | PF11578.1  | DUF3237(Protein of unknown<br>function (DUF3237))                          |
| Supercontig_1.6_MVL<br>G_01139_10sp  | -1467,7116 | -1467,7116 | 0       | 0       | NS | 0 | 0 | 0 | 0 | hypothetical protein                 | NA         | NA                                                                         |
| Supercontig_1.44_MV<br>LG_04134_10sp | -530,68805 | -530,68789 | 0,00032 | 0,00016 | NS | 0 | 0 | 0 | 0 | hypothetical protein                 | PF02913.12 | FAD-oxidase_C(FAD linked<br>oxidases, C-terminal domain)                   |

|                                       |            |            |         |         |    |   |   |   |   |   |                                        |            |                                                                            |
|---------------------------------------|------------|------------|---------|---------|----|---|---|---|---|---|----------------------------------------|------------|----------------------------------------------------------------------------|
| Supercontig_1.125_MV<br>LG_06504_10sp | -1302,6271 | -1301,7942 | 1,66584 | 0,56522 | NS | 0 | □ | □ | □ | □ | hypothetical protein                   | NA         | NA                                                                         |
| Supercontig_1.83_MV<br>LG_05732_11sp  | -498,17464 | -498,17452 | 0,00024 | 0,00012 | NS | 0 | □ | □ | □ | □ | hypothetical protein                   | PF00618.13 | RasGEF_N(motif)                                                            |
| Supercontig_1.6_MVL<br>G_01104_10sp   | -603,81024 | -603,52014 | 0,5802  | 0,25181 | NS | 0 | □ | □ | □ | □ | hypothetical protein                   | PF01988.12 | VIT1(VIT family)                                                           |
| Supercontig_1.39_MV<br>LG_03878_8sp   | -1002,3214 | -1001,2772 | 2,0885  | 0,64804 | NS | 0 | □ | □ | □ | □ | hypothetical protein                   | NA         | NA                                                                         |
| Supercontig_1.12_MV<br>LG_01882_6sp   | -1069,5183 | -1069,4968 | 0,04312 | 0,02133 | NS | 0 | □ | □ | □ | □ | hypothetical protein                   | PF12066.1  | DUF3546(Domain of unknown function (DUF3546))                              |
| Supercontig_1.14_MV<br>LG_01995_7sp   | -603,93839 | -603,85159 | 0,1736  | 0,08314 | NS | 0 | □ | □ | □ | □ | hypothetical protein                   | NA         | NA                                                                         |
| Supercontig_1.88_MV<br>LG_05876_8sp   | -482,42049 | -482,11388 | 0,61322 | 0,26406 | NS | 0 | □ | □ | □ | □ | hypothetical protein                   | PF02225.15 | PA(PA domain)                                                              |
| Supercontig_1.4_MVL<br>G_00858_8sp    | -437,57766 | -437,57766 | 0       | 0       | NS | 0 | □ | □ | □ | □ | hypothetical protein                   | PF00153.20 | Mito_carr(Mitochondrial carrier protein)                                   |
| Supercontig_1.20_MV<br>LG_02547_8sp   | -1017,6198 | -1017,6197 | 0,00028 | 0,00014 | NS | 0 | □ | □ | □ | □ | hypothetical protein                   | PF00168.23 | C2(C2 domain)                                                              |
| Supercontig_1.35_MV<br>LG_03623_10sp  | -643,78413 | -641,59027 | 4,38772 | 0,88851 | NS | 0 | □ | □ | □ | □ | hypothetical protein                   | PF08424.3  | DUF1740(Protein of unknown function (DUF1740))                             |
| Supercontig_1.154_MV<br>LG_06806_9sp  | -476,17884 | -476,11793 | 0,12182 | 0,05909 | NS | 0 | □ | □ | □ | □ | hypothetical protein                   | NA         | NA                                                                         |
| Supercontig_1.1_MVL<br>G_00129_9sp    | -394,7557  | -394,75563 | 0,00014 | 0,00028 | NS | 0 | □ | □ | □ | □ | hypothetical protein                   | PF03982.6  | DAGAT(Diacylglycerol acyltransferase)                                      |
| Supercontig_1.35_MV<br>LG_03580_9sp   | -346,39073 | -346,39073 | 0       | 0       | NS | 0 | □ | □ | □ | □ | hypothetical protein                   | PF09349.3  | OHCU_decarbox(OHCU decarboxylase)                                          |
| Supercontig_1.46_MV<br>LG_04237_7sp   | -822,85671 | -822,85658 | 0,00026 | 0,00013 | NS | 0 | □ | □ | □ | □ | hypothetical protein                   | PF11754.1  | Velvet(Velvet factor)                                                      |
| Supercontig_1.3_MVL<br>G_00487_7sp    | -1011,0971 | -1011,0055 | 0,1832  | 0,08753 | NS | 0 | □ | □ | □ | □ | hypothetical protein                   | PF11799.1  | IMS_C(impB/mucB/samB family C-terminal)                                    |
| Supercontig_1.19_MV<br>LG_02436_10sp  | -560,60905 | -560,60905 | 0       | 0       | NS | 0 | □ | □ | □ | □ | hypothetical protein                   | NA         | NA                                                                         |
| Supercontig_1.5_MVL<br>G_00884_11sp   | -463,9463  | -463,91206 | 0,06848 | 0,03366 | NS | 0 | □ | □ | □ | □ | hypothetical protein                   | PF01209.11 | Ubie_methyltran(ubiE/COQ5 methyltransferase family)                        |
| Supercontig_1.109_MV<br>LG_06281_12sp | -391,14198 | -390,04221 | 2,19954 | 0,66705 | NS | 0 | □ | □ | □ | □ | hypothetical protein                   | PF00096.19 | zf-C2H2(Zinc finger, C2H2 type)                                            |
| Supercontig_1.25_MV<br>LG_02963_7sp   | -416,99509 | -416,99509 | 0       | 0       | NS | 0 | □ | □ | □ | □ | hypothetical protein                   | PF00046.22 | Homeobox(Homeobox domain)                                                  |
| Supercontig_1.46_MV<br>LG_04264_8sp   | -809,49725 | -809,49124 | 0,01202 | 0,00599 | NS | 0 | □ | □ | □ | □ | glutamate-5-semialdehyde dehydrogenase | PF00171.15 | Aldedh(Aldehyde dehydrogenase family)                                      |
| Supercontig_1.6_MVL<br>G_01085_9sp    | -418,65711 | -418,6571  | 0,00028 | 0,00028 | NS | 0 | □ | □ | □ | □ | hypothetical protein                   | NA         | NA                                                                         |
| Supercontig_1.69_MV<br>LG_05293_7sp   | -1265,8135 | -1265,7675 | 0,09206 | 0,04499 | NS | 0 | □ | □ | □ | □ | hypothetical protein                   | PF00005.20 | ABC_tran(ABC transporter)                                                  |
| Supercontig_1.41_MV<br>LG_04015_6sp   | -1437,4781 | -1437,4286 | 0,099   | 0,04829 | NS | 0 | □ | □ | □ | □ | hypothetical protein                   | PF03439.6  | Spt5-NGN(Early transcription elongation factor of RNA pol II, NGN section) |
| Supercontig_1.6_MVL<br>G_01073_10sp   | -446,09522 | -446,0951  | 0,00024 | 0,00012 | NS | 0 | □ | □ | □ | □ | pyridoxine biosynthesis protein PDX1   | PF05690.7  | ThiG(Thiazole biosynthesis protein ThiG)                                   |

|                                       |            |            |         |         |    |   |   |   |   |   |                                                  |            |                                                            |
|---------------------------------------|------------|------------|---------|---------|----|---|---|---|---|---|--------------------------------------------------|------------|------------------------------------------------------------|
| Supercontig_1.25_MV<br>LG_02946_7sp   | -1005,2117 | -1005,2117 | 0       | 0       | NS | 0 | 0 | 0 | 0 | 0 | hypothetical protein                             | NA         | NA                                                         |
| Supercontig_1.18_MV<br>LG_02370_9sp   | -438,57263 | -438,33616 | 0,47294 | 0,21059 | NS | 0 | 0 | 0 | 0 | 0 | hypothetical protein                             | PF00578.14 | AhpC-TSA(AhpC/TSA family)                                  |
| Supercontig_1.74_MV<br>LG_05475_6sp   | -685,55574 | -684,49257 | 2,12634 | 0,65464 | NS | 0 | 0 | 0 | 0 | 0 | hypothetical protein                             | NA         | NA                                                         |
| Supercontig_1.54_MV<br>LG_04696_12sp  | -421,25021 | -421,25013 | 0,00016 | 0,00028 | NS | 0 | 0 | 0 | 0 | 0 | hypothetical protein                             | PF02985.15 | HEAT(HEAT repeat)                                          |
| Supercontig_1.79_MV<br>LG_05630_8sp   | -646,84399 | -646,84399 | 0       | 0       | NS | 0 | 0 | 0 | 0 | 0 | transketolase                                    | PF02780.13 | Transketolase_C(Transketolase,<br>C-terminal domain)       |
| Supercontig_1.149_MV<br>LG_06758_10sp | -603,9397  | -603,9397  | 0       | 0       | NS | 0 | 0 | 0 | 0 | 0 | hypothetical protein                             | PF08643.3  | DUF1776(Fungal family of<br>unknown function (DUF1776))    |
| Supercontig_1.76_MV<br>LG_05508_9sp   | -510,5476  | -510,53267 | 0,02986 | 0,01482 | NS | 0 | 0 | 0 | 0 | 0 | hypothetical protein                             | NA         | NA                                                         |
| Supercontig_1.73_MV<br>LG_05403_10sp  | -718,30782 | -718,02724 | 0,56116 | 0,24465 | NS | 0 | 0 | 0 | 0 | 0 | hypothetical protein                             | PF01564.10 | Spermine_synth(Spermine/sper<br>midine synthase)           |
| Supercontig_1.20_MV<br>LG_02574_12sp  | -939,25603 | -939,25603 | 0       | 0       | NS | 0 | 0 | 0 | 0 | 0 | hypothetical protein                             | PF08214.4  | KAT11(Histone acetylation<br>protein)                      |
| Supercontig_1.27_MV<br>LG_03073_11sp  | -530,98073 | -528,97329 | 4,01488 | 0,86567 | NS | 0 | 0 | 0 | 0 | 0 | hypothetical protein                             | PF04034.6  | DUF367(Domain of unknown<br>function (DUF367))             |
| Supercontig_1.139_MV<br>LG_06669_10sp | -554,65143 | -554,65143 | 0       | 0       | NS | 0 | 0 | 0 | 0 | 0 | hypothetical protein                             | PF00753.20 | Lactamase_B(Metallo-beta-<br>lactamase superfamily)        |
| Supercontig_1.60_MV<br>LG_04951_8sp   | -1116,8295 | -1116,3232 | 1,01244 | 0,39723 | NS | 0 | 0 | 0 | 0 | 0 | hypothetical protein                             | PF00176.16 | SNF2_N(SNF2 family N-terminal<br>domain)                   |
| Supercontig_1.18_MV<br>LG_02371_8sp   | -741,53899 | -741,46754 | 0,1429  | 0,06896 | NS | 0 | 0 | 0 | 0 | 0 | histone<br>acetyltransferase type<br>B subunit 2 | PF00400.25 | WD40(WD domain, G-beta<br>repeat)                          |
| Supercontig_1.18_MV<br>LG_02388_7sp   | -520,46484 | -520,46381 | 0,00206 | 0,00103 | NS | 0 | 0 | 0 | 0 | 0 | hypothetical protein                             | NA         | NA                                                         |
| Supercontig_1.122_MV<br>LG_06463_6sp  | -388,77984 | -388,77981 | 0,00028 | 0,00028 | NS | 0 | 0 | 0 | 0 | 0 | nuclear distribution<br>protein PAC1             | PF00400.25 | WD40(WD domain, G-beta<br>repeat)                          |
| Supercontig_1.60_MV<br>LG_04940_10sp  | -552,39612 | -552,39587 | 0,0005  | 0,00025 | NS | 0 | 0 | 0 | 0 | 0 | hypothetical protein                             | PF00664.16 | ABC_membrane(ABC<br>transporter transmembrane<br>region)   |
| Supercontig_1.132_MV<br>LG_06595_9sp  | -470,65806 | -470,56453 | 0,18706 | 0,08929 | NS | 0 | 0 | 0 | 0 | 0 | hypothetical protein                             | NA         | NA                                                         |
| Supercontig_1.25_MV<br>LG_02917_12sp  | -685,73909 | -685,50114 | 0,4759  | 0,21176 | NS | 0 | 0 | 0 | 0 | 0 | hypothetical protein                             | PF01476.13 | LysM(LysM domain)                                          |
| Supercontig_1.10_MV<br>LG_01637_11sp  | -872,88347 | -871,59869 | 2,56956 | 0,72329 | NS | 0 | 0 | 0 | 0 | 0 | hypothetical protein                             | PF02225.15 | PA(PA domain)                                              |
| Supercontig_1.58_MV<br>LG_04842_10sp  | -381,84781 | -381,84781 | 0       | 0       | NS | 0 | 0 | 0 | 0 | 0 | hypothetical protein                             | PF05127.7  | DUF699(Putative ATPase<br>(DUF699))                        |
| Supercontig_1.96_MV<br>LG_06034_7sp   | -543,65812 | -543,65812 | 0       | 0       | NS | 0 | 0 | 0 | 0 | 0 | 60S ribosomal protein<br>L1-B                    | PF00687.14 | Ribosomal_L1(Ribosomal protein<br>L1p/L10e family)         |
| Supercontig_1.36_MV<br>LG_03686_10sp  | -349,93832 | -349,93793 | 0,00078 | 0,00039 | NS | 0 | 0 | 0 | 0 | 0 | hypothetical protein                             | PF02020.11 | W2(eIF4-gamma/eIF5/eIF2-<br>epsilon)                       |
| Supercontig_1.131_MV<br>LG_06582_12sp | -768,94614 | -768,58908 | 0,71412 | 0,30027 | NS | 0 | 0 | 0 | 0 | 0 | hypothetical protein                             | PF07742.5  | BTG(BTG family)                                            |
| Supercontig_1.66_MV<br>LG_05183_11sp  | -799,92947 | -799,92947 | 0       | 0       | NS | 0 | 0 | 0 | 0 | 0 | hypothetical protein                             | TIGR02251  | TIGR02251(HIF-SF_euk: Dullard-<br>like phosphatase domain) |



|                                       |            |            |         |         |    |   |   |   |   |   |                              |            |                                                           |
|---------------------------------------|------------|------------|---------|---------|----|---|---|---|---|---|------------------------------|------------|-----------------------------------------------------------|
| Supercontig_1.21_MV<br>LG_02674_12sp  | -451,35463 | -450,16244 | 2,38438 | 0,69644 | NS | 0 | □ | □ | □ | □ | hypothetical protein         | PF04163.5  | Tht1(Tht1-like nuclear fusion protein)                    |
| Supercontig_1.124_MV<br>LG_06494_12sp | -787,87938 | -787,87898 | 0,0008  | 0,0004  | NS | 0 | □ | □ | □ | □ | hypothetical protein         | PF04851.8  | ResIII(Type III restriction enzyme, res subunit)          |
| Supercontig_1.3_MVL<br>G_00642_9sp    | -753,55965 | -753,4317  | 0,2559  | 0,1201  | NS | 0 | □ | □ | □ | □ | hypothetical protein         | TIGR00886  | TIGR00886(2A0108: nitrite transporter)                    |
| Supercontig_1.41_MV<br>LG_04036_9sp   | -399,69039 | -399,69019 | 0,0004  | 0,0002  | NS | 0 | □ | □ | □ | □ | hypothetical protein         | PF02383.11 | Syja_N(SacI homology domain)                              |
| Supercontig_1.4_MVL<br>G_00774_8sp    | -648,10737 | -647,23238 | 1,74998 | 0,58313 | NS | 0 | □ | □ | □ | □ | vesicle transporter<br>SEC22 | PF00957.14 | Synaptobrevin(Synaptobrevin)                              |
| Supercontig_1.4_MVL<br>G_00784_7sp    | -624,22613 | -624,22613 | 0       | 0       | NS | 0 | □ | □ | □ | □ | hypothetical protein         | NA         | NA                                                        |
| Supercontig_1.91_MV<br>LG_05927_12sp  | -637,99871 | -637,99871 | 0       | 0       | NS | 0 | □ | □ | □ | □ | hypothetical protein         | NA         | NA                                                        |
| Supercontig_1.44_MV<br>LG_04175_7sp   | -628,6161  | -628,6161  | 0       | 0       | NS | 0 | □ | □ | □ | □ | cysteinyl-tRNA<br>synthetase | TIGR00435  | TIGR00435(cysS: cysteine-tRNA ligase)                     |
| Supercontig_1.1_MVL<br>G_00011_6sp    | -407,33706 | -407,14778 | 0,37856 | 0,17245 | NS | 0 | □ | □ | □ | □ | hypothetical protein         | NA         | NA                                                        |
| Supercontig_1.2_MVL<br>G_00470_11sp   | -494,63996 | -494,63996 | 0       | 0       | NS | 0 | □ | □ | □ | □ | hypothetical protein         | PF12271.1  | Chs3p(Chitin synthase III catalytic subunit)              |
| Supercontig_1.5_MVL<br>G_00968_10sp   | -391,95245 | -391,95242 | 0,00028 | 0,00028 | NS | 0 | □ | □ | □ | □ | hypothetical protein         | NA         | NA                                                        |
| Supercontig_1.58_MV<br>LG_04876_8sp   | -786,08902 | -786,08232 | 0,0134  | 0,00668 | NS | 0 | □ | □ | □ | □ | hypothetical protein         | PF00026.16 | Asp(Eukaryotic aspartyl protease)                         |
| Supercontig_1.86_MV<br>LG_05842_12sp  | -453,57862 | -453,57862 | 0       | 0       | NS | 0 | □ | □ | □ | □ | hypothetical protein         | PF00653.14 | BIR(Inhibitor of Apoptosis domain)                        |
| Supercontig_1.30_MV<br>LG_03293_11sp  | -409,18312 | -409,16931 | 0,02762 | 0,01372 | NS | 0 | □ | □ | □ | □ | hypothetical protein         | PF05572.6  | Peptidase_M43(Pregnancy-associated plasma protein-A)      |
| Supercontig_1.3_MVL<br>G_00652_6sp    | -883,5578  | -883,55721 | 0,00118 | 0,00059 | NS | 0 | □ | □ | □ | □ | hypothetical protein         | PF00328.15 | Acid_phosphat_A(Histidine acid phosphatase)               |
| Supercontig_1.32_MV<br>LG_03419_11sp  | -563,89815 | -563,89814 | 0,00028 | 0,00028 | NS | 0 | □ | □ | □ | □ | hypothetical protein         | PF00400.25 | WD40(WD domain, G-beta repeat)                            |
| Supercontig_1.38_MV<br>LG_03821_7sp   | -635,42705 | -635,4269  | 0,00028 | 0,00028 | NS | 0 | □ | □ | □ | □ | hypothetical protein         | TIGR00598  | TIGR00598(rad14: DNA repair protein)                      |
| Supercontig_1.40_MV<br>LG_03911_6sp   | -313,46891 | -313,46882 | 0,00028 | 0,00028 | NS | 0 | □ | □ | □ | □ | hypothetical protein         | PF03357.14 | Snf7(Snf7)                                                |
| Supercontig_1.19_MV<br>LG_02455_6sp   | -356,23012 | -356,23012 | 0       | 0       | NS | 0 | □ | □ | □ | □ | hypothetical protein         | TIGR01126  | TIGR01126(pdi_dom: protein disulfide-isomerase domain)    |
| Supercontig_1.10_MV<br>LG_01677_6sp   | -680,75406 | -680,55223 | 0,40366 | 0,18277 | NS | 0 | □ | □ | □ | □ | hypothetical protein         | PF07690.9  | MFS_1(Major Facilitator Superfamily)                      |
| Supercontig_1.8_MVL<br>G_01407_10sp   | -517,99726 | -517,58875 | 0,81702 | 0,33536 | NS | 0 | □ | □ | □ | □ | hypothetical protein         | NA         | NA                                                        |
| Supercontig_1.5_MVL<br>G_00896_10sp   | -668,98572 | -668,98572 | 0       | 0       | NS | 0 | □ | □ | □ | □ | hypothetical protein         | NA         | NA                                                        |
| Supercontig_1.11_MV<br>LG_01755_9sp   | -533,73202 | -533,73174 | 0,00056 | 0,00028 | NS | 0 | □ | □ | □ | □ | hypothetical protein         | TIGR00677  | TIGR00677(fadh2_euk: methylenetetrahydrofolate reductase) |
| Supercontig_1.11_MV<br>LG_01774_8sp   | -733,40423 | -729,99396 | 6,82054 | 0,96697 | ** | 0 | □ | □ | □ | □ | hypothetical protein         | PF04632.5  | FUSC(Fusaric acid resistance protein family)              |
| Supercontig_1.76_MV<br>LG_05512_9sp   | -1674,2423 | -1673,72   | 1,04468 | 0,40687 | NS | 0 | □ | □ | □ | □ | hypothetical protein         | PF00566.11 | TBC(TBC domain)                                           |

|                                       |            |            |         |         |    |   |   |   |   |   |   |   |   |   |   |                                      |            |                                                                      |
|---------------------------------------|------------|------------|---------|---------|----|---|---|---|---|---|---|---|---|---|---|--------------------------------------|------------|----------------------------------------------------------------------|
| Supercontig_1.1_MVL<br>G_00095_7sp    | -1070,748  | -1070,748  | 0       | 0       | NS | 0 | 0 | 0 | 0 | 0 | 0 | 0 | 0 | 0 | 0 | hypothetical protein                 | PF00004.22 | AAA(ATPase family associated with various cellular activities (AAA)) |
| Supercontig_1.9_MVL<br>G_01530_9sp    | -498,96889 | -497,44687 | 3,04404 | 0,78173 | NS | 0 | 0 | 0 | 0 | 0 | 0 | 0 | 0 | 0 | 0 | hypothetical protein                 | NA         | NA                                                                   |
| Supercontig_1.78_MV<br>LG_05575_10sp  | -562,1756  | -562,1756  | 0       | 0       | NS | 0 | 0 | 0 | 0 | 0 | 0 | 0 | 0 | 0 | 0 | S-adenosylmethionine transporter     | PF00153.20 | Mito_carr(Mitochondrial carrier protein)                             |
| Supercontig_1.23_MV<br>LG_02828_10sp  | -948,07898 | -948,07862 | 0,00072 | 0,00036 | NS | 0 | 0 | 0 | 0 | 0 | 0 | 0 | 0 | 0 | 0 | hypothetical protein                 | PF01637.11 | Arch_ATPase(Archaeal ATPase)                                         |
| Supercontig_1.141_MV<br>LG_06697_10sp | -493,1669  | -492,94282 | 0,44816 | 0,20075 | NS | 0 | 0 | 0 | 0 | 0 | 0 | 0 | 0 | 0 | 0 | hypothetical protein                 | PF05011.6  | DBR1(Lariat debranching enzyme, C-terminal domain)                   |
| Supercontig_1.122_MV<br>LG_06461_9sp  | -470,17132 | -470,17132 | 0       | 0       | NS | 0 | 0 | 0 | 0 | 0 | 0 | 0 | 0 | 0 | 0 | acetyl-CoA acyltransferase           | TIGR01930  | TIGR01930(AcCoA-C-Actrans: acetyl-CoA C-acetyltransferase)           |
| Supercontig_1.3_MVL<br>G_00533_9sp    | -408,63589 | -408,63569 | 0,0004  | 0,0002  | NS | 0 | 0 | 0 | 0 | 0 | 0 | 0 | 0 | 0 | 0 | hypothetical protein                 | PF04389.10 | Peptidase_M28(Peptidase family M28)                                  |
| Supercontig_1.80_MV<br>LG_05656_10sp  | -354,80493 | -354,80448 | 0,0009  | 0,00045 | NS | 0 | 0 | 0 | 0 | 0 | 0 | 0 | 0 | 0 | 0 | serine/threonine-protein phosphatase | PF00149.21 | Metallophos(Calcineurin-like phosphoesterase)                        |
| Supercontig_1.51_MV<br>LG_04540_10sp  | -374,05683 | -373,53312 | 1,04742 | 0,40768 | NS | 0 | 0 | 0 | 0 | 0 | 0 | 0 | 0 | 0 | 0 | hypothetical protein                 | NA         | NA                                                                   |
| Supercontig_1.213_MV<br>LG_07133_10sp | -860,46418 | -859,91936 | 1,08964 | 0,42005 | NS | 0 | 0 | 0 | 0 | 0 | 0 | 0 | 0 | 0 | 0 | hypothetical protein                 | NA         | NA                                                                   |
| Supercontig_1.155_MV<br>LG_06826_8sp  | -522,59936 | -522,59927 | 0,00018 | 0,00028 | NS | 0 | 0 | 0 | 0 | 0 | 0 | 0 | 0 | 0 | 0 | hypothetical protein                 | PF08743.3  | Nse4(Nse4)                                                           |
| Supercontig_1.141_MV<br>LG_06698_9sp  | -465,24875 | -465,20641 | 0,08468 | 0,04146 | NS | 0 | 0 | 0 | 0 | 0 | 0 | 0 | 0 | 0 | 0 | hypothetical protein                 | NA         | NA                                                                   |
| Supercontig_1.47_MV<br>LG_04306_11sp  | -372,29854 | -372,29849 | 0,00028 | 0,00028 | NS | 0 | 0 | 0 | 0 | 0 | 0 | 0 | 0 | 0 | 0 | hypothetical protein                 | NA         | NA                                                                   |
| Supercontig_1.1_MVL<br>G_00265_11sp   | -343,66992 | -343,66992 | 0       | 0       | NS | 0 | 0 | 0 | 0 | 0 | 0 | 0 | 0 | 0 | 0 | hypothetical protein                 | PF01222.10 | ERG4_ERG24(Ergosterol biosynthesis ERG4/ERG24 family)                |
| Supercontig_1.68_MV<br>LG_05266_11sp  | -499,58094 | -499,58094 | 0       | 0       | NS | 0 | 0 | 0 | 0 | 0 | 0 | 0 | 0 | 0 | 0 | 26S protease regulatory subunit 7    | PF07728.7  | AAA_5(AAA domain (dynein-related subfamily))                         |
| Supercontig_1.1_MVL<br>G_00032_9sp    | -628,45569 | -627,37832 | 2,15474 | 0,65951 | NS | 0 | 0 | 0 | 0 | 0 | 0 | 0 | 0 | 0 | 0 | hypothetical protein                 | PF01656.16 | CbiA(CobQ/CobB/MinD/ParA nucleotide binding domain)                  |
| Supercontig_1.191_MV<br>LG_07047_10sp | -898,48669 | -898,48667 | 0,00028 | 0,00028 | NS | 0 | 0 | 0 | 0 | 0 | 0 | 0 | 0 | 0 | 0 | hypothetical protein                 | NA         | NA                                                                   |
| Supercontig_1.84_MV<br>LG_05769_12sp  | -499,83292 | -499,83292 | 0       | 0       | NS | 0 | 0 | 0 | 0 | 0 | 0 | 0 | 0 | 0 | 0 | hypothetical protein                 | PF08447.4  | PAS_3(PAS fold)                                                      |
| Supercontig_1.8_MVL<br>G_01434_9sp    | -1014,834  | -1014,8334 | 0,00116 | 0,00058 | NS | 0 | 0 | 0 | 0 | 0 | 0 | 0 | 0 | 0 | 0 | hypothetical protein                 | PF04841.6  | Vps16_N(Vps16, N-terminal region)                                    |
| Supercontig_1.4_MVL<br>G_00760_10sp   | -1319,2549 | -1318,7845 | 0,94074 | 0,37523 | NS | 0 | 0 | 0 | 0 | 0 | 0 | 0 | 0 | 0 | 0 | hypothetical protein                 | PF02469.15 | Fasciclin(Fasciclin domain)                                          |
| Supercontig_1.135_MV<br>LG_06637_10sp | -869,89601 | -869,88785 | 0,01632 | 0,00813 | NS | 0 | 0 | 0 | 0 | 0 | 0 | 0 | 0 | 0 | 0 | hypothetical protein                 | PF00176.16 | SNF2_N(SNF2 family N-terminal domain)                                |
| Supercontig_1.16_MV<br>LG_02252_8sp   | -755,8358  | -755,81886 | 0,03388 | 0,0168  | NS | 0 | 0 | 0 | 0 | 0 | 0 | 0 | 0 | 0 | 0 | hypothetical protein                 | PF03151.9  | TPT(Triose-phosphate Transporter family)                             |
| Supercontig_1.81_MV<br>LG_05693_8sp   | -331,00669 | -331,00669 | 0       | 0       | NS | 0 | 0 | 0 | 0 | 0 | 0 | 0 | 0 | 0 | 0 | hypothetical protein                 | NA         | NA                                                                   |
| Supercontig_1.62_MV<br>LG_05005_10sp  | -416,97118 | -416,35615 | 1,23006 | 0,45938 | NS | 0 | 0 | 0 | 0 | 0 | 0 | 0 | 0 | 0 | 0 | hypothetical protein                 | PF11022.1  | DUF2611(Protein of unknown function (DUF2611))                       |

|                                       |            |            |         |         |    |   |   |   |   |   |                               |            |                                                        |
|---------------------------------------|------------|------------|---------|---------|----|---|---|---|---|---|-------------------------------|------------|--------------------------------------------------------|
| Supercontig_1.7_MVL<br>G_01310_10sp   | -452,56099 | -452,56099 | 0       | 0       | NS | 0 | 0 | 0 | 0 | 0 | hypothetical protein          | NA         | NA                                                     |
| Supercontig_1.11_MV<br>LG_01765_9sp   | -1107,2132 | -1106,6034 | 1,21972 | 0,45657 | NS | 0 | 0 | 0 | 0 | 0 | hypothetical protein          | PF00581.13 | Rhodanese(Rhodanese-like domain)                       |
| Supercontig_1.10_MV<br>LG_01584_10sp  | -389,63836 | -389,63836 | 0       | 0       | NS | 0 | 0 | 0 | 0 | 0 | hypothetical protein          | NA         | NA                                                     |
| Supercontig_1.73_MV<br>LG_05409_9sp   | -463,62232 | -461,94791 | 3,34882 | 0,81258 | NS | 0 | 0 | 0 | 0 | 0 | hypothetical protein          | PF01412.11 | ArfGap(Putative GTPase activating protein for Arf)     |
| Supercontig_1.2_MVL<br>G_00469_8sp    | -1208,1051 | -1208,1051 | 0       | 0       | NS | 0 | 0 | 0 | 0 | 0 | glutamyl-tRNA synthetase      | TIGR00464  | TIGR00464(gltX_bact: glutamate-tRNA ligase)            |
| Supercontig_1.33_MV<br>LG_03454_6sp   | -306,34666 | -305,41641 | 1,8605  | 0,60554 | NS | 0 | 0 | 0 | 0 | 0 | hypothetical protein          | NA         | NA                                                     |
| Supercontig_1.35_MV<br>LG_03620_10sp  | -557,32373 | -557,32353 | 0,0004  | 0,0002  | NS | 0 | 0 | 0 | 0 | 0 | hypothetical protein          | PF02913.12 | FAD-oxidase_C(FAD linked oxidases, C-terminal domain)  |
| Supercontig_1.28_MV<br>LG_03145_6sp   | -592,6345  | -591,40368 | 2,46164 | 0,70795 | NS | 0 | 0 | 0 | 0 | 0 | S-formylglutathione hydrolase | PF00756.13 | Esterase(Putative esterase)                            |
| Supercontig_1.125_MV<br>LG_06513_10sp | -425,89814 | -425,89809 | 0,00028 | 0,00028 | NS | 0 | 0 | 0 | 0 | 0 | hypothetical protein          | PF00172.11 | Zn_clus(Fungal Zn(2)-Cys(6) binuclear cluster domain)  |
| Supercontig_1.49_MV<br>LG_04449_8sp   | -593,58062 | -593,58062 | 0       | 0       | NS | 0 | 0 | 0 | 0 | 0 | hypothetical protein          | PF04821.7  | TIMELESS(Timeless protein)                             |
| Supercontig_1.83_MV<br>LG_05733_6sp   | -500,9293  | -500,89891 | 0,06078 | 0,02993 | NS | 0 | 0 | 0 | 0 | 0 | hypothetical protein          | PF10276.2  | zf-CHCC(Zinc-finger domain)                            |
| Supercontig_1.113_MV<br>LG_06344_6sp  | -477,39508 | -477,39504 | 0,00028 | 0,00028 | NS | 0 | 0 | 0 | 0 | 0 | hypothetical protein          | NA         | NA                                                     |
| Supercontig_1.140_MV<br>LG_06689_6sp  | -671,78644 | -671,78644 | 0       | 0       | NS | 0 | 0 | 0 | 0 | 0 | hypothetical protein          | PF00150.11 | Cellulase(Cellulase (glycosyl hydrolase family 5))     |
| Supercontig_1.6_MVL<br>G_01050_10sp   | -841,98279 | -841,98279 | 0       | 0       | NS | 0 | 0 | 0 | 0 | 0 | hypothetical protein          | NA         | NA                                                     |
| Supercontig_1.132_MV<br>LG_06603_10sp | -590,0326  | -590,0326  | 0       | 0       | NS | 0 | 0 | 0 | 0 | 0 | hypothetical protein          | PF00782.13 | DSPc(Dual specificity phosphatase, catalytic domain)   |
| Supercontig_1.1_MVL<br>G_00069_6sp    | -572,09246 | -571,56169 | 1,06154 | 0,41185 | NS | 0 | 0 | 0 | 0 | 0 | hypothetical protein          | NA         | NA                                                     |
| Supercontig_1.22_MV<br>LG_02757_7sp   | -497,76225 | -497,00113 | 1,52224 | 0,53286 | NS | 0 | 0 | 0 | 0 | 0 | hypothetical protein          | NA         | NA                                                     |
| Supercontig_1.69_MV<br>LG_05276_8sp   | -436,34053 | -436,34053 | 0       | 0       | NS | 0 | 0 | 0 | 0 | 0 | hypothetical protein          | NA         | NA                                                     |
| Supercontig_1.32_MV<br>LG_03391_10sp  | -955,64837 | -955,57846 | 0,13982 | 0,06752 | NS | 0 | 0 | 0 | 0 | 0 | hypothetical protein          | PF12455.1  | Dynactin(Dynein associated protein)                    |
| Supercontig_1.46_MV<br>LG_04270_9sp   | -437,88822 | -437,88822 | 0       | 0       | NS | 0 | 0 | 0 | 0 | 0 | hypothetical protein          | PF00097.18 | zf-C3HC4(Zinc finger, C3HC4 type (RING finger))        |
| Supercontig_1.17_MV<br>LG_02323_9sp   | -536,71718 | -536,71718 | 0       | 0       | NS | 0 | 0 | 0 | 0 | 0 | hypothetical protein          | NA         | NA                                                     |
| Supercontig_1.150_MV<br>LG_06783_10sp | -792,59664 | -790,95727 | 3,27874 | 0,8059  | NS | 0 | 0 | 0 | 0 | 0 | hypothetical protein          | PF00412.15 | LIM(LIM domain)                                        |
| Supercontig_1.4_MVL<br>G_00793_9sp    | -945,14323 | -945,14323 | 0       | 0       | NS | 0 | 0 | 0 | 0 | 0 | hypothetical protein          | PF05827.5  | ATP-synt_S1(Vacuolar ATP synthase subunit S1 (ATP6S1)) |
| Supercontig_1.20_MV<br>LG_02532_10sp  | -725,99906 | -725,95241 | 0,0933  | 0,04558 | NS | 0 | 0 | 0 | 0 | 0 | hypothetical protein          | PF07690.9  | MFS_1(Major Facilitator Superfamily)                   |
| Supercontig_1.3_MVL<br>G_00621_9sp    | -618,10955 | -617,80964 | 0,59982 | 0,25912 | NS | 0 | 0 | 0 | 0 | 0 | hypothetical protein          | TIGR00951  | TIGR00951(2A43: Lysosomal Cystine Transporter)         |

|                                      |            |            |         |         |     |   |  |  |  |  |                                |            |                                                                      |
|--------------------------------------|------------|------------|---------|---------|-----|---|--|--|--|--|--------------------------------|------------|----------------------------------------------------------------------|
| Supercontig_1.34_MV<br>LG_03557_6sp  | -364,12487 | -364,12487 | 0       | 0       | NS  | 0 |  |  |  |  | hypothetical protein           | NA         | NA                                                                   |
| Supercontig_1.36_MV<br>LG_03678_6sp  | -435,8638  | -435,86365 | 0,0003  | 0,00015 | NS  | 0 |  |  |  |  | 60S ribosomal protein<br>L34-B | PF01199.11 | Ribosomal_L34e(Ribosomal<br>protein L34e)                            |
| Supercontig_1.11_MV<br>LG_01733_8sp  | -349,04192 | -349,04192 | 0       | 0       | NS  | 0 |  |  |  |  | hypothetical protein           | PF00411.12 | Ribosomal_S11(Ribosomal<br>protein S11)                              |
| Supercontig_1.5_MVL<br>G_00912_9sp   | -477,60308 | -477,10613 | 0,9939  | 0,39162 | NS  | 0 |  |  |  |  | hypothetical protein           | PF01849.11 | NAC(NAC domain)                                                      |
| Supercontig_1.41_MV<br>LG_03985_10sp | -323,76112 | -323,76094 | 0,00036 | 0,00018 | NS  | 0 |  |  |  |  | hypothetical protein           | PF04116.6  | FA_hydroxylase(Fatty acid<br>hydroxylase superfamily)                |
| Supercontig_1.49_MV<br>LG_04405_9sp  | -446,31969 | -446,31968 | 0,00028 | 0,00028 | NS  | 0 |  |  |  |  | hypothetical protein           | PF08511.4  | COQ9(COQ9)                                                           |
| Supercontig_1.26_MV<br>LG_02995_8sp  | -1613,7109 | -1612,2412 | 2,9393  | 0,76999 | NS  | 0 |  |  |  |  | hypothetical protein           | NA         | NA                                                                   |
| Supercontig_1.66_MV<br>LG_05194_10sp | -439,69    | -439,69    | 0       | 0       | NS  | 0 |  |  |  |  | hypothetical protein           | PF00561.13 | Abhydrolase_1(alpha/beta<br>hydrolase fold)                          |
| Supercontig_1.15_MV<br>LG_02157_9sp  | -715,13985 | -715,11236 | 0,05498 | 0,02712 | NS  | 0 |  |  |  |  | hypothetical protein           | PF01237.11 | Oxysterol_BP(Oxysterol-binding<br>protein)                           |
| Supercontig_1.83_MV<br>LG_05747_7sp  | -1839,6526 | -1839,5044 | 0,29644 | 0,13776 | NS  | 0 |  |  |  |  | hypothetical protein           | NA         | NA                                                                   |
| Supercontig_1.142_MV<br>LG_06702_7sp | -945,88922 | -945,76051 | 0,25742 | 0,12077 | NS  | 0 |  |  |  |  | hypothetical protein           | PF03619.9  | DUF300(Domain of unknown<br>function)                                |
| Supercontig_1.23_MV<br>LG_02790_7sp  | -1220,2669 | -1220,2669 | 0       | 0       | NS  | 0 |  |  |  |  | hypothetical protein           | PF07304.4  | SRA1(Steroid receptor RNA<br>activator (SRA1))                       |
| Supercontig_1.91_MV<br>LG_05933_12sp | -375,20243 | -375,20243 | 0       | 0       | NS  | 0 |  |  |  |  | hypothetical protein           | PF03193.9  | DUF258(Protein of unknown<br>function, DUF258)                       |
| Supercontig_1.38_MV<br>LG_03778_11sp | -449,40078 | -449,40076 | 0,00028 | 0,00028 | NS  | 0 |  |  |  |  | hypothetical protein           | PF00172.11 | Zn_clus(Fungal Zn(2)-Cys(6)<br>binuclear cluster domain)             |
| Supercontig_1.61_MV<br>LG_04996_8sp  | -565,56648 | -565,56629 | 0,00038 | 0,00019 | NS  | 0 |  |  |  |  | hypothetical protein           | NA         | NA                                                                   |
| Supercontig_1.15_MV<br>LG_02060_6sp  | -591,68868 | -591,68836 | 0,00064 | 0,00032 | NS  | 0 |  |  |  |  | hypothetical protein           | PF06644.4  | ATP11(ATP11 protein)                                                 |
| Supercontig_1.8_MVL<br>G_01398_7sp   | -501,64979 | -501,64979 | 0       | 0       | NS  | 0 |  |  |  |  | hypothetical protein           | NA         | NA                                                                   |
| Supercontig_1.205_MV<br>LG_07107_9sp | -366,99228 | -366,99227 | 0,00028 | 0,00028 | NS  | 0 |  |  |  |  | hypothetical protein           | PF04418.5  | DUF543(Domain of unknown<br>function (DUF543))                       |
| Supercontig_1.8_MVL<br>G_01457_7sp   | -786,58943 | -781,32395 | 10,531  | 0,99483 | *** | 0 |  |  |  |  | hypothetical protein           | NA         | NA                                                                   |
| Supercontig_1.26_MV<br>LG_03044_9sp  | -417,7628  | -417,7628  | 0       | 0       | NS  | 0 |  |  |  |  | hypothetical protein           | NA         | NA                                                                   |
| Supercontig_1.18_MV<br>LG_02365_9sp  | -507,33867 | -507,31287 | 0,0516  | 0,02547 | NS  | 0 |  |  |  |  | hypothetical protein           | NA         | NA                                                                   |
| Supercontig_1.1_MVL<br>G_00002_9sp   | -416,27833 | -416,27833 | 0       | 0       | NS  | 0 |  |  |  |  | hypothetical protein           | PF00728.15 | Glyco_hydro_20(Glycosyl<br>hydrolase family 20, catalytic<br>domain) |
| Supercontig_1.3_MVL<br>G_00643_6sp   | -378,53692 | -378,53684 | 0,00016 | 0,00028 | NS  | 0 |  |  |  |  | hypothetical protein           | NA         | NA                                                                   |
| Supercontig_1.49_MV<br>LG_04420_11sp | -894,18859 | -892,94731 | 2,48256 | 0,71099 | NS  | 0 |  |  |  |  | hypothetical protein           | PF09258.3  | Glyco_transf_64(Glycosyl<br>transferase family 64 domain)            |
| Supercontig_1.13_MV<br>LG_01937_10sp | -887,53893 | -886,56933 | 1,9392  | 0,62077 | NS  | 0 |  |  |  |  | hypothetical protein           | PF00320.20 | GATA(GATA zinc finger)                                               |



|                                      |            |            |         |                              |    |   |   |   |   |   |                                               |            |                                                                      |
|--------------------------------------|------------|------------|---------|------------------------------|----|---|---|---|---|---|-----------------------------------------------|------------|----------------------------------------------------------------------|
| Supercontig_1.79_MV<br>LG_05614_8sp  | -302,85629 | -302,8562  | 0,00018 | 8.99959<br>5012164<br>28e-05 | NS | 0 | ☐ | ☐ | ☐ | ☐ | hypothetical protein                          | PF08718.4  | GLTP(Glycolipid transfer protein<br>(GLTP))                          |
| Supercontig_1.12_MV<br>LG_01811_12sp | -399,10106 | -397,78427 | 2,63358 | 0,73201                      | NS | 0 | ☐ | ☐ | ☐ | ☐ | hypothetical protein                          | TIGR00491  | TIGR00491(alF-2: translation<br>initiation factor alF-2)             |
| Supercontig_1.1_MVL<br>G_00141_10sp  | -623,06585 | -621,98897 | 2,15376 | 0,65934                      | NS | 0 | ☐ | ☐ | ☐ | ☐ | 3-oxoacyl-[acyl-carrier<br>protein] reductase | PF00106.18 | adh_short(short chain<br>dehydrogenase)                              |
| Supercontig_1.26_MV<br>LG_03039_7sp  | -509,73843 | -509,73839 | 0,00028 | 0,00028                      | NS | 0 | ☐ | ☐ | ☐ | ☐ | hypothetical protein                          | PF00326.14 | Peptidase_S9(Prolyl<br>oligopeptidase family)                        |
| Supercontig_1.1_MVL<br>G_00219_9sp   | -740,7296  | -740,72879 | 0,00162 | 0,00081                      | NS | 0 | ☐ | ☐ | ☐ | ☐ | hypothetical protein                          | PF04675.7  | DNA_ligase_A_N(DNA ligase N<br>terminus)                             |
| Supercontig_1.46_MV<br>LG_04261_8sp  | -412,61863 | -412,49427 | 0,24872 | 0,11694                      | NS | 0 | ☐ | ☐ | ☐ | ☐ | hypothetical protein                          | PF00076.15 | RRM_1(RNA recognition motif.<br>(a.k.a. RRM, RBD, or RNP<br>domain)) |
| Supercontig_1.34_MV<br>LG_03542_7sp  | -1581,9379 | -1581,7021 | 0,4716  | 0,21006                      | NS | 0 | ☐ | ☐ | ☐ | ☐ | hypothetical protein                          | PF09346.3  | SMI1_KNR4(SMI1 / KNR4<br>family)                                     |
| Supercontig_1.52_MV<br>LG_04552_8sp  | -415,90605 | -415,72119 | 0,36972 | 0,16878                      | NS | 0 | ☐ | ☐ | ☐ | ☐ | hypothetical protein                          | PF08316.4  | Pal1(Pal1 cell morphology<br>protein)                                |
| Supercontig_1.34_MV<br>LG_03544_11sp | -426,89273 | -426,89239 | 0,00068 | 0,00034                      | NS | 0 | ☐ | ☐ | ☐ | ☐ | hypothetical protein                          | PF00400.25 | WD40(WD domain, G-beta<br>repeat)                                    |
| Supercontig_1.64_MV<br>LG_05104_12sp | -662,64276 | -662,64276 | 0       | 0                            | NS | 0 | ☐ | ☐ | ☐ | ☐ | hypothetical protein                          | PF00533.19 | BRCT(BRCA1 C Terminus<br>(BRCT) domain)                              |
| Supercontig_1.14_MV<br>LG_02043_10sp | -1716,7591 | -1714,1092 | 5,29986 | 0,92934                      | *  | 0 | ☐ | ☐ | ☐ | ☐ | gamma-<br>glutamyltransferase                 | PF01019.14 | G_glu_transpept(Gamma-<br>glutamyltranspeptidase)                    |
| Supercontig_1.1_MVL<br>G_00057_11sp  | -394,12263 | -393,50502 | 1,23522 | 0,46077                      | NS | 0 | ☐ | ☐ | ☐ | ☐ | hypothetical protein                          | PF00654.13 | Voltage_CLC(Voltage gated<br>chloride channel)                       |
| Supercontig_1.51_MV<br>LG_04512_7sp  | -1145,0213 | -1145,0213 | 0       | 0                            | NS | 0 | ☐ | ☐ | ☐ | ☐ | hypothetical protein                          | PF00462.17 | Glutaredoxin(Glutaredoxin)                                           |
| Supercontig_1.10_MV<br>LG_01634_8sp  | -674,46516 | -674,46516 | 0       | 0                            | NS | 0 | ☐ | ☐ | ☐ | ☐ | hypothetical protein                          | NA         | NA                                                                   |
| Supercontig_1.155_MV<br>LG_06816_9sp | -710,11051 | -709,025   | 2,17102 | 0,66227                      | NS | 0 | ☐ | ☐ | ☐ | ☐ | hypothetical protein                          | NA         | NA                                                                   |
| Supercontig_1.56_MV<br>LG_04786_9sp  | -534,07721 | -533,50416 | 1,1461  | 0,4362                       | NS | 0 | ☐ | ☐ | ☐ | ☐ | hypothetical protein                          | PF03462.11 | PCRF(PCRF domain)                                                    |
| Supercontig_1.6_MVL<br>G_01167_11sp  | -839,63679 | -839,63678 | 0,00028 | 0,00028                      | NS | 0 | ☐ | ☐ | ☐ | ☐ | hypothetical protein                          | NA         | NA                                                                   |
| Supercontig_1.55_MV<br>LG_04710_8sp  | -625,38864 | -625,34104 | 0,0952  | 0,04648                      | NS | 0 | ☐ | ☐ | ☐ | ☐ | hypothetical protein                          | NA         | NA                                                                   |
| Supercontig_1.3_MVL<br>G_00545_11sp  | -562,72619 | -562,72619 | 0       | 0                            | NS | 0 | ☐ | ☐ | ☐ | ☐ | hypothetical protein                          | NA         | NA                                                                   |
| Supercontig_1.5_MVL<br>G_01034_11sp  | -937,32011 | -937,32011 | 0       | 0                            | NS | 0 | ☐ | ☐ | ☐ | ☐ | hypothetical protein                          | PF00385.17 | Chromo('chromo' (CHR)romatin<br>Organisation MOdifier) domain)       |
| Supercontig_1.6_MVL<br>G_01054_9sp   | -782,27059 | -782,27059 | 0       | 0                            | NS | 0 | ☐ | ☐ | ☐ | ☐ | hypothetical protein                          | PF00076.15 | RRM_1(RNA recognition motif.<br>(a.k.a. RRM, RBD, or RNP<br>domain)) |
| Supercontig_1.207_MV<br>LG_07115_6sp | -1147,411  | -1147,411  | 0       | 0                            | NS | 0 | ☐ | ☐ | ☐ | ☐ | hypothetical protein                          | NA         | NA                                                                   |
| Supercontig_1.9_MVL<br>G_01533_11sp  | -558,13905 | -557,18001 | 1,91808 | 0,61674                      | NS | 0 | ☐ | ☐ | ☐ | ☐ | hypothetical protein                          | PF07690.9  | MFS_1(Major Facilitator<br>Superfamily)                              |

|                                      |            |            |         |         |    |   |   |   |   |  |                                              |            |                                                                          |
|--------------------------------------|------------|------------|---------|---------|----|---|---|---|---|--|----------------------------------------------|------------|--------------------------------------------------------------------------|
| Supercontig_1.17_MV<br>LG_02278_9sp  | -1190,1365 | -1189,4611 | 1,35088 | 0,49107 | NS | 0 | 0 | 0 | 0 |  | hypothetical protein                         | PF07716.8  | bZIP_2(Basic region leucine zipper)                                      |
| Supercontig_1.5_MVL<br>G_00997_8sp   | -1231,9011 | -1231,9011 | 0       | 0       | NS | 0 | 0 | 0 | 0 |  | hypothetical protein                         | PF00400.25 | WD40(WD domain, G-beta repeat)                                           |
| Supercontig_1.3_MVL<br>G_00571_9sp   | -1055,1784 | -1055,1784 | 0       | 0       | NS | 0 | 0 | 0 | 0 |  | hypothetical protein                         | PF05686.5  | DUF821(Arabidopsis thaliana protein of unknown function (DUF821))        |
| Supercontig_1.51_MV<br>LG_04496_12sp | -396,49588 | -396,0898  | 0,81216 | 0,33374 | NS | 0 | 0 | 0 | 0 |  | hypothetical protein                         | NA         | NA                                                                       |
| Supercontig_1.2_MVL<br>G_00355_7sp   | -327,75109 | -327,74657 | 0,00904 | 0,00451 | NS | 0 | 0 | 0 | 0 |  | hypothetical protein                         | PF06110.4  | DUF953(Eukaryotic protein of unknown function (DUF953))                  |
| Supercontig_1.16_MV<br>LG_02231_11sp | -495,02871 | -495,02844 | 0,00054 | 0,00027 | NS | 0 | 0 | 0 | 0 |  | hypothetical protein                         | PF01504.11 | PIP5K(Phosphatidylinositol-4-phosphate 5-Kinase)                         |
| Supercontig_1.163_MV<br>LG_06886_8sp | -612,27641 | -612,27566 | 0,0015  | 0,00075 | NS | 0 | 0 | 0 | 0 |  | 60S acidic ribosomal protein P0              | PF00428.12 | Ribosomal_60s(60s Acidic ribosomal protein)                              |
| Supercontig_1.10_MV<br>LG_01630_8sp  | -920,48408 | -920,484   | 0,00016 | 0,00028 | NS | 0 | 0 | 0 | 0 |  | hypothetical protein                         | PF00368.11 | HMG-CoA_red(Hydroxymethylglutaryl-coenzyme A reductase)                  |
| Supercontig_1.46_MV<br>LG_04259_8sp  | -566,06038 | -566,06036 | 0,00028 | 0,00028 | NS | 0 | 0 | 0 | 0 |  | hypothetical protein                         | PF01212.14 | Beta_elim_lyase(Beta-eliminating lyase)                                  |
| Supercontig_1.38_MV<br>LG_03828_9sp  | -784,10683 | -782,81556 | 2,58254 | 0,72508 | NS | 0 | 0 | 0 | 0 |  | hypothetical protein                         | PF07823.4  | CPDase(Cyclic phosphodiesterase-like protein)                            |
| Supercontig_1.20_MV<br>LG_02601_12sp | -646,93657 | -646,93657 | 0       | 0       | NS | 0 | 0 | 0 | 0 |  | hypothetical protein                         | PF03517.6  | ICln_channel(Nucleotide-sensitive chloride conductance regulator (ICln)) |
| Supercontig_1.82_MV<br>LG_05722_12sp | -494,62595 | -494,02714 | 1,19762 | 0,45053 | NS | 0 | 0 | 0 | 0 |  | hypothetical protein                         | PF04003.5  | Utp12(Dip2/Utp12 Family)                                                 |
| Supercontig_1.15_MV<br>LG_02137_9sp  | -1063,304  | -1063,0216 | 0,56484 | 0,24604 | NS | 0 | 0 | 0 | 0 |  | hypothetical protein                         | PF05183.5  | RdRP(RNA dependent RNA polymerase)                                       |
| Supercontig_1.60_MV<br>LG_04933_8sp  | -1388,6339 | -1388,0052 | 1,25742 | 0,46672 | NS | 0 | 0 | 0 | 0 |  | hypothetical protein                         | NA         | NA                                                                       |
| Supercontig_1.33_MV<br>LG_03499_10sp | -981,11842 | -981,05498 | 0,12688 | 0,06147 | NS | 0 | 0 | 0 | 0 |  | hypothetical protein                         | PF01613.11 | Flavin_Reduct(Flavin reductase like domain)                              |
| Supercontig_1.8_MVL<br>G_01417_6sp   | -524,69206 | -524,6786  | 0,02692 | 0,01337 | NS | 0 | 0 | 0 | 0 |  | hypothetical protein                         | PF00107.19 | ADH_zinc_N(Zinc-binding dehydrogenase)                                   |
| Supercontig_1.41_MV<br>LG_04010_6sp  | -394,0377  | -394,03768 | 0,00028 | 0,00028 | NS | 0 | 0 | 0 | 0 |  | hypothetical protein                         | PF01868.9  | UPF0086(Domain of unknown function UPF0086)                              |
| Supercontig_1.1_MVL<br>G_00180_6sp   | -1209,9144 | -1208,4197 | 2,98934 | 0,77568 | NS | 0 | 0 | 0 | 0 |  | tubulin beta chain                           | PF10644.2  | Misat_Myo_SegII(Misato Segment II myosin-like domain)                    |
| Supercontig_1.38_MV<br>LG_03761_9sp  | -771,63725 | -771,63697 | 0,00056 | 0,00028 | NS | 0 | 0 | 0 | 0 |  | succinate-semialdehyde dehydrogenase [NADP+] | PF00171.15 | Aldedh(Aldehyde dehydrogenase family)                                    |
| Supercontig_1.38_MV<br>LG_03762_12sp | -533,92891 | -533,92891 | 0       | 0       | NS | 0 | 0 | 0 | 0 |  | hypothetical protein                         | PF02985.15 | HEAT(HEAT repeat)                                                        |
| Supercontig_1.4_MVL<br>G_00747_9sp   | -391,44671 | -391,44648 | 0,00046 | 0,00023 | NS | 0 | 0 | 0 | 0 |  | hypothetical protein                         | NA         | NA                                                                       |
| Supercontig_1.36_MV<br>LG_03652_6sp  | -646,99301 | -646,99246 | 0,0011  | 0,00055 | NS | 0 | 0 | 0 | 0 |  | hypothetical protein                         | TIGR00589  | TIGR00589(ogt: methylated-DNA-[protein]-cysteine S-methyltransferase)    |

|                                       |            |            |         |         |    |   |   |   |   |   |   |   |   |   |   |   |   |   |   |   |                              |            |                                                                          |
|---------------------------------------|------------|------------|---------|---------|----|---|---|---|---|---|---|---|---|---|---|---|---|---|---|---|------------------------------|------------|--------------------------------------------------------------------------|
| Supercontig_1.23_MV<br>LG_02824_9sp   | -1267,8003 | -1267,8003 | 0       | 0       | NS | 0 | 0 | 0 | 0 | 0 | 0 | 0 | 0 | 0 | 0 | 0 | 0 | 0 | 0 | 0 | hypothetical protein         | NA         | NA                                                                       |
| Supercontig_1.6_MVL<br>G_01145_8sp    | -654,93604 | -654,00777 | 1,85654 | 0,60476 | NS | 0 | 0 | 0 | 0 | 0 | 0 | 0 | 0 | 0 | 0 | 0 | 0 | 0 | 0 | 0 | hypothetical protein         | PF00067.15 | p450(Cytochrome P450)                                                    |
| Supercontig_1.45_MV<br>LG_04208_6sp   | -1053,1505 | -1052,4173 | 1,46632 | 0,51961 | NS | 0 | 0 | 0 | 0 | 0 | 0 | 0 | 0 | 0 | 0 | 0 | 0 | 0 | 0 | 0 | DNA repair helicase<br>ercc3 | PF04851.8  | ResIII(Type III restriction<br>enzyme, res subunit)                      |
| Supercontig_1.19_MV<br>LG_02475_7sp   | -614,98577 | -614,98577 | 0       | 0       | NS | 0 | 0 | 0 | 0 | 0 | 0 | 0 | 0 | 0 | 0 | 0 | 0 | 0 | 0 | 0 | hypothetical protein         | PF05179.7  | CDC73(RNA pol II accessory<br>factor, Cdc73 family)                      |
| Supercontig_1.98_MV<br>LG_06080_8sp   | -1312,8498 | -1311,9467 | 1,80618 | 0,59468 | NS | 0 | 0 | 0 | 0 | 0 | 0 | 0 | 0 | 0 | 0 | 0 | 0 | 0 | 0 | 0 | hypothetical protein         | NA         | NA                                                                       |
| Supercontig_1.26_MV<br>LG_03002_10sp  | -966,99192 | -966,99192 | 0       | 0       | NS | 0 | 0 | 0 | 0 | 0 | 0 | 0 | 0 | 0 | 0 | 0 | 0 | 0 | 0 | 0 | hypothetical protein         | NA         | NA                                                                       |
| Supercontig_1.14_MV<br>LG_02028_7sp   | -564,7568  | -564,7568  | 0       | 0       | NS | 0 | 0 | 0 | 0 | 0 | 0 | 0 | 0 | 0 | 0 | 0 | 0 | 0 | 0 | 0 | hypothetical protein         | NA         | NA                                                                       |
| Supercontig_1.8_MVL<br>G_01397_6sp    | -1431,5978 | -1430,2737 | 2,6482  | 0,73396 | NS | 0 | 0 | 0 | 0 | 0 | 0 | 0 | 0 | 0 | 0 | 0 | 0 | 0 | 0 | 0 | hypothetical protein         | PF00476.13 | DNA_pol_A(DNA polymerase<br>family A)                                    |
| Supercontig_1.2_MVL<br>G_00358_7sp    | -490,13505 | -490,12619 | 0,01772 | 0,00882 | NS | 0 | 0 | 0 | 0 | 0 | 0 | 0 | 0 | 0 | 0 | 0 | 0 | 0 | 0 | 0 | hypothetical protein         | PF03061.15 | 4HBT(Thioesterase superfamily)                                           |
| Supercontig_1.2_MVL<br>G_00379_7sp    | -687,90062 | -687,73303 | 0,33518 | 0,1543  | NS | 0 | 0 | 0 | 0 | 0 | 0 | 0 | 0 | 0 | 0 | 0 | 0 | 0 | 0 | 0 | hypothetical protein         | PF01522.14 | Polysacc_deac_1(Polysaccharid<br>e deacetylase)                          |
| Supercontig_1.21_MV<br>LG_02610_11sp  | -457,62354 | -457,62354 | 0       | 0       | NS | 0 | 0 | 0 | 0 | 0 | 0 | 0 | 0 | 0 | 0 | 0 | 0 | 0 | 0 | 0 | hypothetical protein         | NA         | NA                                                                       |
| Supercontig_1.18_MV<br>LG_02357_7sp   | -673,99541 | -673,7115  | 0,56782 | 0,24717 | NS | 0 | 0 | 0 | 0 | 0 | 0 | 0 | 0 | 0 | 0 | 0 | 0 | 0 | 0 | 0 | hypothetical protein         | PF00153.20 | Mito_carr(Mitochondrial carrier<br>protein)                              |
| Supercontig_1.123_MV<br>LG_06473_7sp  | -888,03257 | -888,03257 | 0       | 0       | NS | 0 | 0 | 0 | 0 | 0 | 0 | 0 | 0 | 0 | 0 | 0 | 0 | 0 | 0 | 0 | hypothetical protein         | PF05291.4  | Bystin(Bystin)                                                           |
| Supercontig_1.56_MV<br>LG_04762_12sp  | -437,20878 | -437,55661 | 0       | 0       | NS | 0 | 0 | 0 | 0 | 0 | 0 | 0 | 0 | 0 | 0 | 0 | 0 | 0 | 0 | 0 | hypothetical protein         | PF00282.12 | Pyridoxal_deC(Pyridoxal-<br>dependent decarboxylase<br>conserved domain) |
| Supercontig_1.69_MV<br>LG_05305_9sp   | -389,38913 | -389,38913 | 0       | 0       | NS | 0 | 0 | 0 | 0 | 0 | 0 | 0 | 0 | 0 | 0 | 0 | 0 | 0 | 0 | 0 | hypothetical protein         | NA         | NA                                                                       |
| Supercontig_1.1_MVL<br>G_00150_7sp    | -743,61908 | -743,61873 | 0,0007  | 0,00035 | NS | 0 | 0 | 0 | 0 | 0 | 0 | 0 | 0 | 0 | 0 | 0 | 0 | 0 | 0 | 0 | hypothetical protein         | PF03169.8  | OPT(OPT oligopeptide<br>transporter protein)                             |
| Supercontig_1.22_MV<br>LG_02698_8sp   | -660,20756 | -658,67785 | 3,05942 | 0,7834  | NS | 0 | 0 | 0 | 0 | 0 | 0 | 0 | 0 | 0 | 0 | 0 | 0 | 0 | 0 | 0 | hypothetical protein         | NA         | NA                                                                       |
| Supercontig_1.4_MVL<br>G_00868_6sp    | -1088,4838 | -1088,1054 | 0,7567  | 0,31501 | NS | 0 | 0 | 0 | 0 | 0 | 0 | 0 | 0 | 0 | 0 | 0 | 0 | 0 | 0 | 0 | hypothetical protein         | PF09812.2  | MRP-L28(Mitochondrial<br>ribosomal protein L28)                          |
| Supercontig_1.205_MV<br>LG_07113_10sp | -837,80677 | -837,80677 | 0       | 0       | NS | 0 | 0 | 0 | 0 | 0 | 0 | 0 | 0 | 0 | 0 | 0 | 0 | 0 | 0 | 0 | hypothetical protein         | TIGR01494  | TIGR01494(ATPase_P-type:<br>HAD ATPase, P-type, family IC)               |
| Supercontig_1.3_MVL<br>G_00538_7sp    | -441,93782 | -440,95253 | 1,97058 | 0,62667 | NS | 0 | 0 | 0 | 0 | 0 | 0 | 0 | 0 | 0 | 0 | 0 | 0 | 0 | 0 | 0 | hypothetical protein         | NA         | NA                                                                       |
| Supercontig_1.4_MVL<br>G_00715_9sp    | -306,7128  | -306,71265 | 0,0003  | 0,00015 | NS | 0 | 0 | 0 | 0 | 0 | 0 | 0 | 0 | 0 | 0 | 0 | 0 | 0 | 0 | 0 | hypothetical protein         | PF02953.8  | zf-Tim10_DDP(Tim10/DDP<br>family zinc finger)                            |
| Supercontig_1.31_MV<br>LG_03380_8sp   | -311,64033 | -311,63983 | 0,001   | 0,0005  | NS | 0 | 0 | 0 | 0 | 0 | 0 | 0 | 0 | 0 | 0 | 0 | 0 | 0 | 0 | 0 | hypothetical protein         | PF04893.10 | Yip1(Yip1 domain)                                                        |
| Supercontig_1.46_MV<br>LG_04240_9sp   | -595,94799 | -595,94799 | 0       | 0       | NS | 0 | 0 | 0 | 0 | 0 | 0 | 0 | 0 | 0 | 0 | 0 | 0 | 0 | 0 | 0 | hypothetical protein         | PF01073.12 | 3Beta_HSD(3-beta<br>hydroxysteroid<br>dehydrogenase/isomerase<br>family) |
| Supercontig_1.41_MV<br>LG_03988_10sp  | -471,62991 | -471,62991 | 0       | 0       | NS | 0 | 0 | 0 | 0 | 0 | 0 | 0 | 0 | 0 | 0 | 0 | 0 | 0 | 0 | 0 | hypothetical protein         | PF06221.6  | zf-C2HC5(Putative zinc finger<br>motif, C2HC5-type)                      |



|                                      |            |            |         |         |    |   |   |   |   |   |                        |            |                                                                    |
|--------------------------------------|------------|------------|---------|---------|----|---|---|---|---|---|------------------------|------------|--------------------------------------------------------------------|
| Supercontig_1.59_MV<br>LG_04902_8sp  | -572,2158  | -572,20383 | 0,02394 | 0,0119  | NS | 0 | □ | □ | □ | □ | hypothetical protein   | NA         | NA                                                                 |
| Supercontig_1.124_MV<br>LG_06493_6sp | -580,4523  | -580,45212 | 0,00036 | 0,00018 | NS | 0 | □ | □ | □ | □ | hypothetical protein   | PF00787.17 | PX(PX domain)                                                      |
| Supercontig_1.17_MV<br>LG_02275_6sp  | -736,38477 | -736,38477 | 0       | 0       | NS | 0 | □ | □ | □ | □ | hypothetical protein   | PF02518.19 | HATPase_c(Histidine kinase-, DNA gyrase B-, and HSP90-like ATPase) |
| Supercontig_1.85_MV<br>LG_05797_9sp  | -641,18019 | -640,50719 | 1,346   | 0,48982 | NS | 0 | □ | □ | □ | □ | hypothetical protein   | PF00076.15 | RRM_1(RNA recognition motif. (a.k.a. RRM, RBD, or RNP domain))     |
| Supercontig_1.7_MVL<br>G_01336_6sp   | -607,53503 | -607,53498 | 0,00016 | 0,00016 | NS | 0 | □ | □ | □ | □ | hypothetical protein   | NA         | NA                                                                 |
| Supercontig_1.21_MV<br>LG_02647_10sp | -805,3527  | -805,3527  | 0       | 0       | NS | 0 | □ | □ | □ | □ | hypothetical protein   | NA         | NA                                                                 |
| Supercontig_1.32_MV<br>LG_03385_8sp  | -654,04814 | -653,95494 | 0,1864  | 0,08899 | NS | 0 | □ | □ | □ | □ | hypothetical protein   | PF03798.9  | TRAM_LAG1_CLN8(TLC domain)                                         |
| Supercontig_1.7_MVL<br>G_01295_10sp  | -334,22546 | -334,20828 | 0,03436 | 0,01703 | NS | 0 | □ | □ | □ | □ | hypothetical protein   | TIGR00152  | TIGR00152(TIGR00152: dephospho-CoA kinase)                         |
| Supercontig_1.3_MVL<br>G_00582_8sp   | -805,86682 | -805,86667 | 0,0003  | 0,00015 | NS | 0 | □ | □ | □ | □ | hypothetical protein   | NA         | NA                                                                 |
| Supercontig_1.45_MV<br>LG_04195_6sp  | -382,91348 | -382,47764 | 0,87168 | 0,35328 | NS | 0 | □ | □ | □ | □ | hypothetical protein   | NA         | NA                                                                 |
| Supercontig_1.6_MVL<br>G_01201_11sp  | -316,45851 | -315,13102 | 2,65498 | 0,73486 | NS | 0 | □ | □ | □ | □ | C-22 sterol desaturase | PF00067.15 | p450(Cytochrome P450)                                              |
| Supercontig_1.198_MV<br>LG_07077_8sp | -983,21761 | -983,16934 | 0,09654 | 0,04712 | NS | 0 | □ | □ | □ | □ | hypothetical protein   | PF01602.13 | Adaptin_N(Adaptin N terminal region)                               |
| Supercontig_1.2_MVL<br>G_00372_10sp  | -323,04604 | -323,04603 | 0,00016 | 0,00016 | NS | 0 | □ | □ | □ | □ | hypothetical protein   | PF00806.12 | PUF(Pumilio-family RNA binding repeat)                             |
| Supercontig_1.13_MV<br>LG_01908_10sp | -298,57586 | -298,55796 | 0,0358  | 0,01774 | NS | 0 | □ | □ | □ | □ | hypothetical protein   | NA         | NA                                                                 |
| Supercontig_1.36_MV<br>LG_03655_11sp | -313,08705 | -313,40809 | 0       | 0       | NS | 0 | □ | □ | □ | □ | acyl-CoA dehydrogenase | PF02770.12 | Acyl-CoA_dh_M(Acyl-CoA dehydrogenase, middle domain)               |
| Supercontig_1.91_MV<br>LG_05921_9sp  | -350,23954 | -350,23948 | 0,00012 | 0,00016 | NS | 0 | □ | □ | □ | □ | hypothetical protein   | PF00787.17 | PX(PX domain)                                                      |
| Supercontig_1.39_MV<br>LG_03855_6sp  | -385,67934 | -385,58934 | 0,18    | 0,08607 | NS | 0 | □ | □ | □ | □ | hypothetical protein   | PF00041.14 | fn3(Fibronectin type III domain)                                   |
| Supercontig_1.28_MV<br>LG_03138_8sp  | -676,6656  | -676,66551 | 0,00018 | 0,00016 | NS | 0 | □ | □ | □ | □ | hypothetical protein   | PF08659.3  | KR(KR domain)                                                      |
| Supercontig_1.6_MVL<br>G_01135_10sp  | -583,98858 | -583,91508 | 0,147   | 0,07086 | NS | 0 | □ | □ | □ | □ | hypothetical protein   | PF05700.4  | BCAS2(Breast carcinoma amplified sequence 2 (BCAS2))               |
| Supercontig_1.67_MV<br>LG_05243_7sp  | -458,32393 | -458,32208 | 0,0037  | 0,00185 | NS | 0 | □ | □ | □ | □ | hypothetical protein   | NA         | NA                                                                 |
| Supercontig_1.88_MV<br>LG_05887_8sp  | -683,04745 | -683,04718 | 0,00054 | 0,00027 | NS | 0 | □ | □ | □ | □ | hypothetical protein   | PF01398.14 | Mov34(Mov34/MPN/PAD-1 family)                                      |
| Supercontig_1.44_MV<br>LG_04137_10sp | -390,81067 | -390,81036 | 0,00062 | 0,00031 | NS | 0 | □ | □ | □ | □ | tubulin alpha-1A chain | PF00091.18 | Tubulin(Tubulin/FtsZ family, GTPase domain)                        |
| Supercontig_1.1_MVL<br>G_00178_10sp  | -540,58168 | -540,58168 | 0       | 0       | NS | 0 | □ | □ | □ | □ | hypothetical protein   | PF03144.18 | GTP_EFTU_D2(Elongation factor Tu domain 2)                         |
| Supercontig_1.6_MVL<br>G_01068_9sp   | -568,96912 | -568,96912 | 0       | 0       | NS | 0 | □ | □ | □ | □ | hypothetical protein   | NA         | NA                                                                 |

|                                       |            |            |         |         |    |   |   |   |   |   |   |   |   |   |   |   |   |   |   |   |                              |            |                                                          |
|---------------------------------------|------------|------------|---------|---------|----|---|---|---|---|---|---|---|---|---|---|---|---|---|---|---|------------------------------|------------|----------------------------------------------------------|
| Supercontig_1.111_MV<br>LG_06312_8sp  | -1033,7937 | -1033,7937 | 0       | 0       | NS | 0 | 0 | 0 | 0 | 0 | 0 | 0 | 0 | 0 | 0 | 0 | 0 | 0 | 0 | 0 | hypothetical protein         | PF00168.23 | C2(C2 domain)                                            |
| Supercontig_1.32_MV<br>LG_03416_7sp   | -465,85979 | -464,458   | 2,80358 | 0,75384 | NS | 0 | 0 | 0 | 0 | 0 | 0 | 0 | 0 | 0 | 0 | 0 | 0 | 0 | 0 | 0 | hypothetical protein         | PF00106.18 | adh_short(short chain dehydrogenase)                     |
| Supercontig_1.31_MV<br>LG_03332_12sp  | -785,73714 | -784,53412 | 2,40604 | 0,69971 | NS | 0 | 0 | 0 | 0 | 0 | 0 | 0 | 0 | 0 | 0 | 0 | 0 | 0 | 0 | 0 | hypothetical protein         | NA         | NA                                                       |
| Supercontig_1.102_MV<br>LG_06176_7sp  | -790,27084 | -790,27071 | 0,00026 | 0,00013 | NS | 0 | 0 | 0 | 0 | 0 | 0 | 0 | 0 | 0 | 0 | 0 | 0 | 0 | 0 | 0 | hypothetical protein         | PF00106.18 | adh_short(short chain dehydrogenase)                     |
| Supercontig_1.88_MV<br>LG_05900_10sp  | -887,20587 | -885,81189 | 2,78796 | 0,75191 | NS | 0 | 0 | 0 | 0 | 0 | 0 | 0 | 0 | 0 | 0 | 0 | 0 | 0 | 0 | 0 | hypothetical protein         | NA         | NA                                                       |
| Supercontig_1.3_MVL<br>G_00620_11sp   | -329,9272  | -329,927   | 0,0004  | 0,0002  | NS | 0 | 0 | 0 | 0 | 0 | 0 | 0 | 0 | 0 | 0 | 0 | 0 | 0 | 0 | 0 | hypothetical protein         | PF08159.5  | NUC153(NUC153 domain)                                    |
| Supercontig_1.7_MVL<br>G_01311_7sp    | -955,59211 | -953,56799 | 4,04824 | 0,86789 | NS | 0 | 0 | 0 | 0 | 0 | 0 | 0 | 0 | 0 | 0 | 0 | 0 | 0 | 0 | 0 | hypothetical protein         | PF00581.13 | Rhodanese(Rhodanese-like domain)                         |
| Supercontig_1.95_MV<br>LG_06024_7sp   | -751,63626 | -751,45918 | 0,35416 | 0,16229 | NS | 0 | 0 | 0 | 0 | 0 | 0 | 0 | 0 | 0 | 0 | 0 | 0 | 0 | 0 | 0 | hypothetical protein         | PF07690.9  | MFS_1(Major Facilitator Superfamily)                     |
| Supercontig_1.56_MV<br>LG_04792_10sp  | -551,60485 | -551,60483 | 0,00016 | 0,00016 | NS | 0 | 0 | 0 | 0 | 0 | 0 | 0 | 0 | 0 | 0 | 0 | 0 | 0 | 0 | 0 | hypothetical protein         | PF03473.10 | MOSC(MOSC domain)                                        |
| Supercontig_1.63_MV<br>LG_05088_10sp  | -845,81744 | -845,69876 | 0,23736 | 0,11191 | NS | 0 | 0 | 0 | 0 | 0 | 0 | 0 | 0 | 0 | 0 | 0 | 0 | 0 | 0 | 0 | hypothetical protein         | PF05739.12 | SNARE(SNARE domain)                                      |
| Supercontig_1.107_MV<br>LG_06249_12sp | -664,09146 | -664,09146 | 0       | 0       | NS | 0 | 0 | 0 | 0 | 0 | 0 | 0 | 0 | 0 | 0 | 0 | 0 | 0 | 0 | 0 | hypothetical protein         | NA         | NA                                                       |
| Supercontig_1.112_MV<br>LG_06327_9sp  | -548,98036 | -548,98036 | 0       | 0       | NS | 0 | 0 | 0 | 0 | 0 | 0 | 0 | 0 | 0 | 0 | 0 | 0 | 0 | 0 | 0 | AGC/PKA protein kinase       | PF07714.10 | Pkinase_Tyr(Protein tyrosine kinase)                     |
| Supercontig_1.3_MVL<br>G_00568_7sp    | -437,49459 | -437,49459 | 0       | 0       | NS | 0 | 0 | 0 | 0 | 0 | 0 | 0 | 0 | 0 | 0 | 0 | 0 | 0 | 0 | 0 | hypothetical protein         | PF00781.17 | DAGK_cat(Diacylglycerol kinase catalytic domain)         |
| Supercontig_1.12_MV<br>LG_01867_9sp   | -456,37425 | -456,37389 | 0,00072 | 0,00036 | NS | 0 | 0 | 0 | 0 | 0 | 0 | 0 | 0 | 0 | 0 | 0 | 0 | 0 | 0 | 0 | hypothetical protein         | PF01417.13 | ENTH(ENTH domain)                                        |
| Supercontig_1.176_MV<br>LG_06979_11sp | -920,39607 | -920,39607 | 0       | 0       | NS | 0 | 0 | 0 | 0 | 0 | 0 | 0 | 0 | 0 | 0 | 0 | 0 | 0 | 0 | 0 | IRE protein kinase           | PF07714.10 | Pkinase_Tyr(Protein tyrosine kinase)                     |
| Supercontig_1.16_MV<br>LG_02239_10sp  | -364,58288 | -364,58278 | 0,00016 | 0,00016 | NS | 0 | 0 | 0 | 0 | 0 | 0 | 0 | 0 | 0 | 0 | 0 | 0 | 0 | 0 | 0 | hypothetical protein         | PF01193.17 | RNA_pol_L(RNA polymerase Rpb3/Rpb11 dimerisation domain) |
| Supercontig_1.1_MVL<br>G_00088_8sp    | -228,23419 | -228,23418 | 0,00016 | 0,00016 | NS | 0 | 0 | 0 | 0 | 0 | 0 | 0 | 0 | 0 | 0 | 0 | 0 | 0 | 0 | 0 | hypothetical protein         | PF08598.4  | Sds3(Sds3-like)                                          |
| Supercontig_1.94_MV<br>LG_05988_8sp   | -420,07546 | -420,07546 | 0       | 0       | NS | 0 | 0 | 0 | 0 | 0 | 0 | 0 | 0 | 0 | 0 | 0 | 0 | 0 | 0 | 0 | hypothetical protein         | NA         | NA                                                       |
| Supercontig_1.42_MV<br>LG_04077_10sp  | -788,53968 | -788,3019  | 0,47556 | 0,21162 | NS | 0 | 0 | 0 | 0 | 0 | 0 | 0 | 0 | 0 | 0 | 0 | 0 | 0 | 0 | 0 | hypothetical protein         | PF00628.22 | PHD(PHD-finger)                                          |
| Supercontig_1.42_MV<br>LG_04064_10sp  | -491,33262 | -491,2457  | 0,17384 | 0,08325 | NS | 0 | 0 | 0 | 0 | 0 | 0 | 0 | 0 | 0 | 0 | 0 | 0 | 0 | 0 | 0 | hypothetical protein         | PF03914.10 | CBF(CBF/Mak21 family)                                    |
| Supercontig_1.5_MVL<br>G_01019_9sp    | -441,94579 | -441,59461 | 0,70236 | 0,29614 | NS | 0 | 0 | 0 | 0 | 0 | 0 | 0 | 0 | 0 | 0 | 0 | 0 | 0 | 0 | 0 | hypothetical protein         | PF08613.4  | Cyclin(Cyclin)                                           |
| Supercontig_1.11_MV<br>LG_01772_8sp   | -280,12339 | -280,12326 | 0,00026 | 0,00013 | NS | 0 | 0 | 0 | 0 | 0 | 0 | 0 | 0 | 0 | 0 | 0 | 0 | 0 | 0 | 0 | hypothetical protein         | PF00400.25 | WD40(WD domain, G-beta repeat)                           |
| Supercontig_1.5_MVL<br>G_00966_10sp   | -658,8747  | -658,41671 | 0,91598 | 0,36745 | NS | 0 | 0 | 0 | 0 | 0 | 0 | 0 | 0 | 0 | 0 | 0 | 0 | 0 | 0 | 0 | hypothetical protein         | PF00400.25 | WD40(WD domain, G-beta repeat)                           |
| Supercontig_1.40_MV<br>LG_03960_8sp   | -335,30543 | -335,30543 | 0       | 0       | NS | 0 | 0 | 0 | 0 | 0 | 0 | 0 | 0 | 0 | 0 | 0 | 0 | 0 | 0 | 0 | RIO2 atypical protein kinase | PF09202.4  | Rio2_N(Rio2, N-terminal)                                 |
| Supercontig_1.45_MV<br>LG_04196_7sp   | -344,78207 | -344,782   | 0,00014 | 0,00016 | NS | 0 | 0 | 0 | 0 | 0 | 0 | 0 | 0 | 0 | 0 | 0 | 0 | 0 | 0 | 0 | dihydroorotase               | TIGR00856  | TIGR00856(pyrC_dimer: dihydroorotase, homodimeric type)  |

|                                      |            |            |         |         |     |   |   |   |   |   |   |   |   |   |   |   |   |                                |            |                                                                      |
|--------------------------------------|------------|------------|---------|---------|-----|---|---|---|---|---|---|---|---|---|---|---|---|--------------------------------|------------|----------------------------------------------------------------------|
| Supercontig_1.31_MV<br>LG_03364_9sp  | -492,78809 | -492,78809 | 0       | 0       | NS  | 0 | 0 | 0 | 0 | 0 | 0 | 0 | 0 | 0 | 0 | 0 | 0 | hypothetical protein           | PF02984.12 | Cyclin_C(Cyclin, C-terminal domain)                                  |
| Supercontig_1.6_MVL<br>G_01122_8sp   | -1271,0129 | -1271,0129 | 0       | 0       | NS  | 0 | 0 | 0 | 0 | 0 | 0 | 0 | 0 | 0 | 0 | 0 | 0 | hypothetical protein           | NA         | NA                                                                   |
| Supercontig_1.17_MV<br>LG_02268_10sp | -345,60425 | -345,60425 | 0       | 0       | NS  | 0 | 0 | 0 | 0 | 0 | 0 | 0 | 0 | 0 | 0 | 0 | 0 | hypothetical protein           | NA         | NA                                                                   |
| Supercontig_1.31_MV<br>LG_03352_12sp | -1044,7836 | -1044,7836 | 0       | 0       | NS  | 0 | 0 | 0 | 0 | 0 | 0 | 0 | 0 | 0 | 0 | 0 | 0 | hypothetical protein           | PF00270.22 | DEAD(DEAD/DEAH box helicase)                                         |
| Supercontig_1.9_MVL<br>G_01480_10sp  | -1037,5849 | -1037,4782 | 0,21346 | 0,10123 | NS  | 0 | 0 | 0 | 0 | 0 | 0 | 0 | 0 | 0 | 0 | 0 | 0 | hypothetical protein           | PF02373.15 | JmjC(JmjC domain)                                                    |
| Supercontig_1.9_MVL<br>G_01540_10sp  | -652,90132 | -652,90132 | 0       | 0       | NS  | 0 | 0 | 0 | 0 | 0 | 0 | 0 | 0 | 0 | 0 | 0 | 0 | hypothetical protein           | NA         | NA                                                                   |
| Supercontig_1.15_MV<br>LG_02151_8sp  | -798,5249  | -798,5249  | 0       | 0       | NS  | 0 | 0 | 0 | 0 | 0 | 0 | 0 | 0 | 0 | 0 | 0 | 0 | hypothetical protein           | TIGR00512  | TIGR00512(salvage_mtnA: S-methyl-5-thioribose-1-phosphate isomerase) |
| Supercontig_1.22_MV<br>LG_02694_6sp  | -836,05198 | -836,05198 | 0       | 0       | NS  | 0 | 0 | 0 | 0 | 0 | 0 | 0 | 0 | 0 | 0 | 0 | 0 | hypothetical protein           | PF10294.2  | Methyltransf_16(Putative methyltransferase)                          |
| Supercontig_1.33_MV<br>LG_03453_8sp  | -371,23378 | -371,23322 | 0,00112 | 0,00056 | NS  | 0 | 0 | 0 | 0 | 0 | 0 | 0 | 0 | 0 | 0 | 0 | 0 | hypothetical protein           | PF03660.7  | PHF5(PHF5-like protein)                                              |
| Supercontig_1.36_MV<br>LG_03675_9sp  | -376,62936 | -376,62936 | 0       | 0       | NS  | 0 | 0 | 0 | 0 | 0 | 0 | 0 | 0 | 0 | 0 | 0 | 0 | high-affinity iron transporter | PF03239.7  | FTR1(Iron permease FTR1 family)                                      |
| Supercontig_1.7_MVL<br>G_01309_6sp   | -1154,1938 | -1154,1938 | 0       | 0       | NS  | 0 | 0 | 0 | 0 | 0 | 0 | 0 | 0 | 0 | 0 | 0 | 0 | hypothetical protein           | PF00067.15 | p450(Cytochrome P450)                                                |
| Supercontig_1.11_MV<br>LG_01726_9sp  | -1300,8615 | -1300,7857 | 0,15162 | 0,07301 | NS  | 0 | 0 | 0 | 0 | 0 | 0 | 0 | 0 | 0 | 0 | 0 | 0 | hypothetical protein           | PF09739.2  | DUF2044(Conserved membrane protein (DUF2044))                        |
| Supercontig_1.21_MV<br>LG_02658_12sp | -861,49008 | -855,57399 | 11,8322 | 0,9973  | *** | 0 | 0 | 0 | 0 | 0 | 0 | 0 | 0 | 0 | 0 | 0 | 0 | hypothetical protein           | PF00324.14 | AA_permease(Amino acid permease)                                     |
| Supercontig_1.35_MV<br>LG_03615_9sp  | -381,19103 | -381,19108 | 0       | 0       | NS  | 0 | 0 | 0 | 0 | 0 | 0 | 0 | 0 | 0 | 0 | 0 | 0 | hypothetical protein           | PF01172.11 | SBDS(Shwachman-Bodian-Diamond syndrome (SBDS) protein)               |
| Supercontig_1.24_MV<br>LG_02851_7sp  | -543,16434 | -543,01036 | 0,30796 | 0,14271 | NS  | 0 | 0 | 0 | 0 | 0 | 0 | 0 | 0 | 0 | 0 | 0 | 0 | hypothetical protein           | PF09816.2  | EAF(RNA polymerase II transcription elongation factor)               |
| Supercontig_1.4_MVL<br>G_00746_8sp   | -1141,9002 | -1141,9002 | 0       | 0       | NS  | 0 | 0 | 0 | 0 | 0 | 0 | 0 | 0 | 0 | 0 | 0 | 0 | hypothetical protein           | PF06745.6  | KaiC(KaiC)                                                           |
| Supercontig_1.7_MVL<br>G_01252_9sp   | -460,80566 | -459,15994 | 3,29144 | 0,80713 | NS  | 0 | 0 | 0 | 0 | 0 | 0 | 0 | 0 | 0 | 0 | 0 | 0 | hypothetical protein           | NA         | NA                                                                   |
| Supercontig_1.28_MV<br>LG_03207_8sp  | -951,237   | -950,38821 | 1,69758 | 0,57207 | NS  | 0 | 0 | 0 | 0 | 0 | 0 | 0 | 0 | 0 | 0 | 0 | 0 | hypothetical protein           | PF00657.15 | Lipase_GDSL(GDSL-like Lipase/Acylhydrolase)                          |
| Supercontig_1.20_MV<br>LG_02563_10sp | -545,00475 | -544,43213 | 1,14524 | 0,43595 | NS  | 0 | 0 | 0 | 0 | 0 | 0 | 0 | 0 | 0 | 0 | 0 | 0 | hypothetical protein           | PF08704.3  | GCD14(tRNA methyltransferase complex GCD14 subunit)                  |
| Supercontig_1.68_MV<br>LG_05261_7sp  | -1150,9608 | -1150,9608 | 0,00016 | 0,00016 | NS  | 0 | 0 | 0 | 0 | 0 | 0 | 0 | 0 | 0 | 0 | 0 | 0 | hypothetical protein           | NA         | NA                                                                   |
| Supercontig_1.7_MVL<br>G_01343_9sp   | -706,64386 | -706,26372 | 0,76028 | 0,31623 | NS  | 0 | 0 | 0 | 0 | 0 | 0 | 0 | 0 | 0 | 0 | 0 | 0 | hypothetical protein           | PF00535.19 | Glycos_transf_2(Glycosyl transferase family 2)                       |
| Supercontig_1.58_MV<br>LG_04870_6sp  | -1081,7575 | -1081,7575 | 0       | 0       | NS  | 0 | 0 | 0 | 0 | 0 | 0 | 0 | 0 | 0 | 0 | 0 | 0 | STE/STE20/YSK protein kinase   | PF07714.10 | Pkinase_Tyr(Protein tyrosine kinase)                                 |
| Supercontig_1.81_MV<br>LG_05688_9sp  | -602,43368 | -602,36109 | 0,14518 | 0,07002 | NS  | 0 | 0 | 0 | 0 | 0 | 0 | 0 | 0 | 0 | 0 | 0 | 0 | hypothetical protein           | NA         | NA                                                                   |
| Supercontig_1.7_MVL<br>G_01322_8sp   | -282,64494 | -282,24242 | 0,80504 | 0,33137 | NS  | 0 | 0 | 0 | 0 | 0 | 0 | 0 | 0 | 0 | 0 | 0 | 0 | hypothetical protein           | NA         | NA                                                                   |

|                                      |            |            |         |         |    |   |  |  |  |  |                                         |            |                                                                          |
|--------------------------------------|------------|------------|---------|---------|----|---|--|--|--|--|-----------------------------------------|------------|--------------------------------------------------------------------------|
| Supercontig_1.25_MV<br>LG_02951_8sp  | -1313,0315 | -1313,0315 | 0       | 0       | NS | 0 |  |  |  |  | hypothetical protein                    | PF11708.1  | Slu7(Pre-mRNA splicing Prp18-interacting factor)                         |
| Supercontig_1.64_MV<br>LG_05112_6sp  | -1030,4229 | -1030,1869 | 0,472   | 0,21022 | NS | 0 |  |  |  |  | hypothetical protein                    | PF00185.17 | OTCace(Aspartate/ornithine carbamoyltransferase, Asp/Orn binding domain) |
| Supercontig_1.1_MVL<br>G_00076_10sp  | -726,60467 | -725,7783  | 1,65274 | 0,56236 | NS | 0 |  |  |  |  | hypothetical protein                    | PF00628.22 | PHD(PHD-finger)                                                          |
| Supercontig_1.30_MV<br>LG_03294_8sp  | -448,94199 | -448,94199 | 0       | 0       | NS | 0 |  |  |  |  | hypothetical protein                    | NA         | NA                                                                       |
| Supercontig_1.96_MV<br>LG_06051_8sp  | -425,09824 | -421,52362 | 7,14924 | 0,97197 | ** | 0 |  |  |  |  | hypothetical protein                    | NA         | NA                                                                       |
| Supercontig_1.2_MVL<br>G_00418_6sp   | -346,64672 | -346,64671 | 0,00016 | 0,00016 | NS | 0 |  |  |  |  | hypothetical protein                    | NA         | NA                                                                       |
| Supercontig_1.32_MV<br>LG_03401_6sp  | -489,06865 | -485,25079 | 7,63572 | 0,97803 | ** | 0 |  |  |  |  | hypothetical protein                    | NA         | NA                                                                       |
| Supercontig_1.3_MVL<br>G_00555_8sp   | -357,12063 | -357,12063 | 0       | 0       | NS | 0 |  |  |  |  | metal homeostasis factor ATX1           | PF00403.19 | HMA(Heavy-metal-associated domain)                                       |
| Supercontig_1.6_MVL<br>G_01105_9sp   | -778,10264 | -778,10264 | 0       | 0       | NS | 0 |  |  |  |  | hypothetical protein                    | PF01398.14 | Mov34(Mov34/MPN/PAD-1 family)                                            |
| Supercontig_1.60_MV<br>LG_04946_8sp  | -680,27271 | -679,03142 | 2,48258 | 0,71099 | NS | 0 |  |  |  |  | GTP-binding protein rhoA                | PF08477.6  | Miro(Miro-like protein)                                                  |
| Supercontig_1.9_MVL<br>G_01527_8sp   | -875,75661 | -875,75661 | 0       | 0       | NS | 0 |  |  |  |  | CMGC/RCK/MAK protein kinase             | PF07714.10 | Pkinase_Tyr(Protein tyrosine kinase)                                     |
| Supercontig_1.36_MV<br>LG_03682_10sp | -708,20516 | -708,02796 | 0,3544  | 0,16239 | NS | 0 |  |  |  |  | 6-phosphofructokinase                   | PF00365.13 | PFK(Phosphofructokinase)                                                 |
| Supercontig_1.11_MV<br>LG_01743_8sp  | -278,62544 | -278,62539 | 0,0001  | 0,00016 | NS | 0 |  |  |  |  | hypothetical protein                    | PF08603.4  | CAP_C(Adenylate cyclase associated (CAP) C terminal)                     |
| Supercontig_1.80_MV<br>LG_05636_9sp  | -580,67276 | -580,67242 | 0,00068 | 0,00034 | NS | 0 |  |  |  |  | mitochondrial chaperone BCS1            | PF08740.4  | BCS1_N(BCS1 N terminal)                                                  |
| Supercontig_1.68_MV<br>LG_05270_12sp | -428,0651  | -427,32216 | 1,48588 | 0,52429 | NS | 0 |  |  |  |  | hypothetical protein                    | PF07934.5  | OGG_N(8-oxoguanine DNA glycosylase, N-terminal domain)                   |
| Supercontig_1.16_MV<br>LG_02181_6sp  | -815,71127 | -815,71127 | 0       | 0       | NS | 0 |  |  |  |  | hypothetical protein                    | NA         | NA                                                                       |
| Supercontig_1.97_MV<br>LG_06056_6sp  | -884,58664 | -884,58664 | 0       | 0       | NS | 0 |  |  |  |  | hypothetical protein                    | PF03171.13 | 2OG-FeII_Oxy(2OG-Fe(II) oxygenase superfamily)                           |
| Supercontig_1.35_MV<br>LG_03621_6sp  | -774,39077 | -774,39077 | 0       | 0       | NS | 0 |  |  |  |  | hypothetical protein                    | PF00501.21 | AMP-binding(AMP-binding enzyme)                                          |
| Supercontig_1.11_MV<br>LG_01722_9sp  | -655,58258 | -655,58241 | 0,00034 | 0,00017 | NS | 0 |  |  |  |  | V-type H+-transporting ATPase subunit I | PF01496.12 | V_ATPase_I(V-type ATPase 116kDa subunit family)                          |
| Supercontig_1.68_MV<br>LG_05267_6sp  | -1458,6476 | -1458,6476 | 0       | 0       | NS | 0 |  |  |  |  | SCY1 protein kinase                     | NA         | NA                                                                       |
| Supercontig_1.91_MV<br>LG_05936_11sp | -1192,9565 | -1192,9374 | 0,03834 | 0,01899 | NS | 0 |  |  |  |  | hypothetical protein                    | PF00621.13 | RhoGEF(RhoGEF domain)                                                    |
| Supercontig_1.14_MV<br>LG_01996_8sp  | -537,54733 | -537,54733 | 0       | 0       | NS | 0 |  |  |  |  | hypothetical protein                    | PF12621.1  | DUF3779(Phosphate metabolism protein)                                    |
| Supercontig_1.16_MV<br>LG_02245_8sp  | -631,10874 | -631,10872 | 0,00016 | 0,00016 | NS | 0 |  |  |  |  | hypothetical protein                    | NA         | NA                                                                       |
| Supercontig_1.8_MVL<br>G_01413_8sp   | -858,82136 | -858,68354 | 0,27564 | 0,12874 | NS | 0 |  |  |  |  | hypothetical protein                    | NA         | NA                                                                       |



|                                       |            |            |         |         |    |   |   |   |   |   |   |   |   |   |                                                            |            |                                                                      |
|---------------------------------------|------------|------------|---------|---------|----|---|---|---|---|---|---|---|---|---|------------------------------------------------------------|------------|----------------------------------------------------------------------|
| Supercontig_1.62_MV<br>LG_05041_9sp   | -439,06409 | -439,06409 | 0       | 0       | NS | 0 | 0 | 0 | 0 | 0 | 0 | 0 | 0 | 0 | Histone acetyltransferase subunit NuA4                     | PF09340.3  | NuA4(Histone acetyltransferase subunit NuA4)                         |
| Supercontig_1.81_MV<br>LG_05678_6sp   | -797,29758 | -797,29758 | 0       | 0       | NS | 0 | 0 | 0 | 0 | 0 | 0 | 0 | 0 | 0 | hypothetical protein                                       | PF04446.5  | Thg1(tRNAHis guanylyltransferase)                                    |
| Supercontig_1.5_MVL<br>G_00894_7sp    | -599,91086 | -599,34956 | 1,1226  | 0,42953 | NS | 0 | 0 | 0 | 0 | 0 | 0 | 0 | 0 | 0 | nicotinate (nicotinamide) nucleotide adenyltransferase     | PF01467.19 | CTP_transf_2(Cytidylyltransferase)                                   |
| Supercontig_1.7_MVL<br>G_01337_9sp    | -1576,5307 | -1576,5045 | 0,0524  | 0,02586 | NS | 0 | 0 | 0 | 0 | 0 | 0 | 0 | 0 | 0 | hypothetical protein                                       | PF00083.17 | Sugar_tr(Sugar (and other) transporter)                              |
| Supercontig_1.96_MV<br>LG_06031_10sp  | -428,78765 | -428,78719 | 0,00092 | 0,00046 | NS | 0 | 0 | 0 | 0 | 0 | 0 | 0 | 0 | 0 | hypothetical protein                                       | PF03357.14 | Snf7(Snf7)                                                           |
| Supercontig_1.13_MV<br>LG_01885_10sp  | -475,01761 | -475,0176  | 0,00016 | 0,00016 | NS | 0 | 0 | 0 | 0 | 0 | 0 | 0 | 0 | 0 | hypothetical protein                                       | PF00172.11 | Zn_clus(Fungal Zn(2)-Cys(6) binuclear cluster domain)                |
| Supercontig_1.139_MV<br>LG_06657_9sp  | -1187,275  | -1187,275  | 0       | 0       | NS | 0 | 0 | 0 | 0 | 0 | 0 | 0 | 0 | 0 | hypothetical protein                                       | PF08389.5  | Xpo1(Exportin 1-like protein)                                        |
| Supercontig_1.36_MV<br>LG_03666_9sp   | -848,73566 | -848,59394 | 0,28344 | 0,13214 | NS | 0 | 0 | 0 | 0 | 0 | 0 | 0 | 0 | 0 | hypothetical protein                                       | PF00172.11 | Zn_clus(Fungal Zn(2)-Cys(6) binuclear cluster domain)                |
| Supercontig_1.4_MVL<br>G_00744_11sp   | -465,39983 | -465,39952 | 0,00062 | 0,00031 | NS | 0 | 0 | 0 | 0 | 0 | 0 | 0 | 0 | 0 | hypothetical protein                                       | PF00152.13 | tRNA-synt_2(tRNA synthetases class II (D, K and N))                  |
| Supercontig_1.78_MV<br>LG_05589_9sp   | -431,69695 | -429,44848 | 4,49694 | 0,89444 | NS | 0 | 0 | 0 | 0 | 0 | 0 | 0 | 0 | 0 | hypothetical protein                                       | TIGR00049  | TIGR00049(TIGR00049: iron-sulfur cluster assembly accessory protein) |
| Supercontig_1.88_MV<br>LG_05896_7sp   | -434,39891 | -434,39888 | 0,00016 | 0,00016 | NS | 0 | 0 | 0 | 0 | 0 | 0 | 0 | 0 | 0 | hypothetical protein                                       | NA         | NA                                                                   |
| Supercontig_1.140_MV<br>LG_06684_10sp | -411,29913 | -411,29911 | 0,00016 | 0,00016 | NS | 0 | 0 | 0 | 0 | 0 | 0 | 0 | 0 | 0 | hypothetical protein                                       | PF00172.11 | Zn_clus(Fungal Zn(2)-Cys(6) binuclear cluster domain)                |
| Supercontig_1.36_MV<br>LG_03662_10sp  | -393,39364 | -393,39364 | 0       | 0       | NS | 0 | 0 | 0 | 0 | 0 | 0 | 0 | 0 | 0 | hypothetical protein                                       | PF01150.10 | GDA1_CD39(GDA1/CD39 (nucleoside phosphatase) family)                 |
| Supercontig_1.100_MV<br>LG_06142_10sp | -537,75123 | -537,41436 | 0,67374 | 0,286   | NS | 0 | 0 | 0 | 0 | 0 | 0 | 0 | 0 | 0 | Dolichyl-diphosphooligosaccharide-protein glycotransferase | PF04756.6  | OST3_OST6(OST3 / OST6 family)                                        |
| Supercontig_1.40_MV<br>LG_03958_8sp   | -759,90578 | -759,90567 | 0,00022 | 0,00011 | NS | 0 | 0 | 0 | 0 | 0 | 0 | 0 | 0 | 0 | 3-oxoacyl-[acyl-carrier protein] reductase                 | PF00106.18 | adh_short(short chain dehydrogenase)                                 |
| Supercontig_1.38_MV<br>LG_03764_10sp  | -438,60794 | -437,95237 | 1,31114 | 0,48085 | NS | 0 | 0 | 0 | 0 | 0 | 0 | 0 | 0 | 0 | 3-isopropylmalate dehydrogenase                            | TIGR00169  | TIGR00169(leuB: 3-isopropylmalate dehydrogenase)                     |
| Supercontig_1.81_MV<br>LG_05680_9sp   | -939,51552 | -939,50555 | 0,01994 | 0,00992 | NS | 0 | 0 | 0 | 0 | 0 | 0 | 0 | 0 | 0 | hypothetical protein                                       | NA         | NA                                                                   |
| Supercontig_1.55_MV<br>LG_04726_7sp   | -986,18251 | -986,14279 | 0,07944 | 0,03894 | NS | 0 | 0 | 0 | 0 | 0 | 0 | 0 | 0 | 0 | hypothetical protein                                       | NA         | NA                                                                   |
| Supercontig_1.95_MV<br>LG_06007_6sp   | -930,0085  | -930,0085  | 0       | 0       | NS | 0 | 0 | 0 | 0 | 0 | 0 | 0 | 0 | 0 | ADP,ATP carrier protein                                    | PF00153.20 | Mito_carr(Mitochondrial carrier protein)                             |
| Supercontig_1.5_MVL<br>G_01030_9sp    | -482,8708  | -482,78241 | 0,17678 | 0,0846  | NS | 0 | 0 | 0 | 0 | 0 | 0 | 0 | 0 | 0 | hypothetical protein                                       | NA         | NA                                                                   |
| Supercontig_1.4_MVL<br>G_00866_7sp    | -953,47073 | -953,47058 | 0,0003  | 0,00015 | NS | 0 | 0 | 0 | 0 | 0 | 0 | 0 | 0 | 0 | hypothetical protein                                       | PF06814.6  | Lung_7-TM_R(Lung seven transmembrane receptor)                       |

|                                       |            |            |         |         |    |   |   |   |   |   |   |   |   |   |   |                                               |            |                                                                               |
|---------------------------------------|------------|------------|---------|---------|----|---|---|---|---|---|---|---|---|---|---|-----------------------------------------------|------------|-------------------------------------------------------------------------------|
| Supercontig_1.4_MVL<br>G_00777_8sp    | -1005,5849 | -1005,0127 | 1,14452 | 0,43575 | NS | 0 | 0 | 0 | 0 | 0 | 0 | 0 | 0 | 0 | 0 | hypothetical protein                          | PF10282.2  | Muc_lac_enz(3-carboxy-cis,cis-muconate lactonizing enzyme)                    |
| Supercontig_1.10_MV<br>LG_01683_10sp  | -607,66974 | -607,66974 | 0       | 0       | NS | 0 | 0 | 0 | 0 | 0 | 0 | 0 | 0 | 0 | 0 | hypothetical protein                          | NA         | NA                                                                            |
| Supercontig_1.66_MV<br>LG_05192_9sp   | -1250,5381 | -1250,4143 | 0,24752 | 0,11641 | NS | 0 | 0 | 0 | 0 | 0 | 0 | 0 | 0 | 0 | 0 | hypothetical protein                          | PF04547.5  | Anoctamin(Calcium-activated chloride channel)                                 |
| Supercontig_1.121_MV<br>LG_06433_11sp | -475,44498 | -475,44498 | 0       | 0       | NS | 0 | 0 | 0 | 0 | 0 | 0 | 0 | 0 | 0 | 0 | hypothetical protein                          | PF04488.8  | Gly_transf_sug(Glycosyltransferase sugar-binding region containing DXD motif) |
| Supercontig_1.11_MV<br>LG_01771_7sp   | -717,66683 | -717,66683 | 0       | 0       | NS | 0 | 0 | 0 | 0 | 0 | 0 | 0 | 0 | 0 | 0 | hypothetical protein                          | PF03134.12 | TB2_DP1_HVA22(TB2/DP1, HVA22 family)                                          |
| Supercontig_1.63_MV<br>LG_05074_8sp   | -480,55422 | -480,53779 | 0,03286 | 0,0163  | NS | 0 | 0 | 0 | 0 | 0 | 0 | 0 | 0 | 0 | 0 | hypothetical protein                          | NA         | NA                                                                            |
| Supercontig_1.52_MV<br>LG_04556_9sp   | -1888,5593 | -1886,3882 | 4,34236 | 0,88596 | NS | 0 | 0 | 0 | 0 | 0 | 0 | 0 | 0 | 0 | 0 | hypothetical protein                          | NA         | NA                                                                            |
| Supercontig_1.69_MV<br>LG_05314_7sp   | -866,48903 | -865,26301 | 2,45204 | 0,70654 | NS | 0 | 0 | 0 | 0 | 0 | 0 | 0 | 0 | 0 | 0 | hypothetical protein                          | NA         | NA                                                                            |
| Supercontig_1.35_MV<br>LG_03608_11sp  | -1032,738  | -1032,5941 | 0,28788 | 0,13406 | NS | 0 | 0 | 0 | 0 | 0 | 0 | 0 | 0 | 0 | 0 | heat shock protein 104                        | PF07724.7  | AAA_2(AAA domain (Cdc48 subfamily))                                           |
| Supercontig_1.50_MV<br>LG_04466_9sp   | -925,96219 | -925,96145 | 0,00148 | 0,00074 | NS | 0 | 0 | 0 | 0 | 0 | 0 | 0 | 0 | 0 | 0 | hypothetical protein                          | PF01656.16 | CbiA(CobQ/CobB/MinD/ParA nucleotide binding domain)                           |
| Supercontig_1.6_MVL<br>G_01200_9sp    | -379,90208 | -379,90201 | 0,00014 | 0,00016 | NS | 0 | 0 | 0 | 0 | 0 | 0 | 0 | 0 | 0 | 0 | vacuolar protein sorting-associated protein 4 | PF01695.10 | IstB(IstB-like ATP binding protein)                                           |
| Supercontig_1.83_MV<br>LG_05730_9sp   | -536,95441 | -537,43762 | 0       | 0       | NS | 0 | 0 | 0 | 0 | 0 | 0 | 0 | 0 | 0 | 0 | diphthine synthase                            | TIGR00522  | TIGR00522(dph5: diphthine synthase)                                           |
| Supercontig_1.58_MV<br>LG_04847_6sp   | -1832,1411 | -1830,7423 | 2,79754 | 0,7531  | NS | 0 | 0 | 0 | 0 | 0 | 0 | 0 | 0 | 0 | 0 | hypothetical protein                          | NA         | NA                                                                            |
| Supercontig_1.41_MV<br>LG_04032_7sp   | -850,82146 | -850,82069 | 0,00154 | 0,00077 | NS | 0 | 0 | 0 | 0 | 0 | 0 | 0 | 0 | 0 | 0 | hypothetical protein                          | PF08790.4  | zf-LYAR(LYAR-type C2HC zinc finger)                                           |
| Supercontig_1.29_MV<br>LG_03219_9sp   | -644,64772 | -644,64762 | 0,0002  | 0,00016 | NS | 0 | 0 | 0 | 0 | 0 | 0 | 0 | 0 | 0 | 0 | hypothetical protein                          | PF00018.21 | SH3_1(SH3 domain)                                                             |
| Supercontig_1.91_MV<br>LG_05938_6sp   | -478,64644 | -477,23126 | 2,83036 | 0,75712 | NS | 0 | 0 | 0 | 0 | 0 | 0 | 0 | 0 | 0 | 0 | hypothetical protein                          | NA         | NA                                                                            |
| Supercontig_1.131_MV<br>LG_06587_8sp  | -1185,8612 | -1185,7359 | 0,25058 | 0,11776 | NS | 0 | 0 | 0 | 0 | 0 | 0 | 0 | 0 | 0 | 0 | hypothetical protein                          | PF08559.3  | Cut8(Cut8)                                                                    |
| Supercontig_1.127_MV<br>LG_06540_6sp  | -313,18847 | -313,18845 | 0,00016 | 0,00016 | NS | 0 | 0 | 0 | 0 | 0 | 0 | 0 | 0 | 0 | 0 | hypothetical protein                          | PF01722.11 | BolA(BolA-like protein)                                                       |
| Supercontig_1.2_MVL<br>G_00348_12sp   | -666,64284 | -666,64284 | 0       | 0       | NS | 0 | 0 | 0 | 0 | 0 | 0 | 0 | 0 | 0 | 0 | hypothetical protein                          | PF01363.14 | FYVE(FYVE zinc finger)                                                        |
| Supercontig_1.97_MV<br>LG_06064_9sp   | -725,61978 | -725,32463 | 0,5903  | 0,25558 | NS | 0 | 0 | 0 | 0 | 0 | 0 | 0 | 0 | 0 | 0 | hypothetical protein                          | PF00636.19 | Ribonuclease_3(RNase3 domain)                                                 |
| Supercontig_1.21_MV<br>LG_02665_8sp   | -849,77741 | -849,77686 | 0,0011  | 0,00055 | NS | 0 | 0 | 0 | 0 | 0 | 0 | 0 | 0 | 0 | 0 | GTP-binding protein LepA                      | TIGR01393  | TIGR01393(lepA: GTP-binding protein LepA)                                     |
| Supercontig_1.65_MV<br>LG_05148_11sp  | -643,0815  | -643,0815  | 0       | 0       | NS | 0 | 0 | 0 | 0 | 0 | 0 | 0 | 0 | 0 | 0 | STE/STE11 protein kinase                      | PF07714.10 | Pkinase_Tyr(Protein tyrosine kinase)                                          |
| Supercontig_1.75_MV<br>LG_05480_12sp  | -368,26109 | -368,26109 | 0       | 0       | NS | 0 | 0 | 0 | 0 | 0 | 0 | 0 | 0 | 0 | 0 | Ca2+-transporting ATPase                      | TIGR01494  | TIGR01494(ATPase_P-type: HAD ATPase, P-type, family IC)                       |
| Supercontig_1.50_MV<br>LG_04492_9sp   | -645,9158  | -645,91565 | 0,0003  | 0,00015 | NS | 0 | 0 | 0 | 0 | 0 | 0 | 0 | 0 | 0 | 0 | hypothetical protein                          | PF11715.1  | Nup160(Nucleoporin Nup120/160)                                                |





|                                      |            |            |         |         |    |   |   |   |   |                                      |            |                                                                          |
|--------------------------------------|------------|------------|---------|---------|----|---|---|---|---|--------------------------------------|------------|--------------------------------------------------------------------------|
| Supercontig_1.2_MVL<br>G_00298_6sp   | -263,62031 | -263,62026 | 0,0001  | 0,00016 | NS | 0 | □ | □ | □ | ATPase GET3                          | PF01656.16 | CbiA(CobQ/CobB/MinD/ParA<br>nucleotide binding domain)                   |
| Supercontig_1.139_MV<br>LG_06660_8sp | -619,02505 | -618,68213 | 0,68584 | 0,29031 | NS | 0 | □ | □ | □ | hypothetical protein                 | NA         | NA                                                                       |
| Supercontig_1.76_MV<br>LG_05524_8sp  | -1219,2179 | -1219,2179 | 0       | 0       | NS | 0 | □ | □ | □ | hypothetical protein                 | NA         | NA                                                                       |
| Supercontig_1.47_MV<br>LG_04344_10sp | -509,48243 | -509,48242 | 0,00016 | 0,00016 | NS | 0 | □ | □ | □ | hypothetical protein                 | PF08640.4  | U3_assoc_6(U3 small nucleolar<br>RNA-associated protein 6)               |
| Supercontig_1.17_MV<br>LG_02296_11sp | -741,38562 | -741,38555 | 0,00016 | 0,00016 | NS | 0 | □ | □ | □ | hypothetical protein                 | PF01485.14 | IBR(IBR domain)                                                          |
| Supercontig_1.40_MV<br>LG_03941_6sp  | -899,25898 | -899,06386 | 0,39024 | 0,17726 | NS | 0 | □ | □ | □ | hypothetical protein                 | NA         | NA                                                                       |
| Supercontig_1.7_MVL<br>G_01258_9sp   | -507,33871 | -507,33871 | 0       | 0       | NS | 0 | □ | □ | □ | hypothetical protein                 | NA         | NA                                                                       |
| Supercontig_1.1_MVL<br>G_00173_8sp   | -742,01582 | -742,01582 | 0       | 0       | NS | 0 | □ | □ | □ | hypothetical protein                 | PF00026.16 | Asp(Eukaryotic aspartyl<br>protease)                                     |
| Supercontig_1.73_MV<br>LG_05425_8sp  | -1234,4548 | -1234,4548 | 0       | 0       | NS | 0 | □ | □ | □ | hypothetical protein                 | PF00172.11 | Zn_clus(Fungal Zn(2)-Cys(6)<br>binuclear cluster domain)                 |
| Supercontig_1.15_MV<br>LG_02104_8sp  | -520,94511 | -520,9451  | 0,00016 | 0,00016 | NS | 0 | □ | □ | □ | hypothetical protein                 | NA         | NA                                                                       |
| Supercontig_1.4_MVL<br>G_00693_11sp  | -553,39017 | -552,73611 | 1,30812 | 0,48007 | NS | 0 | □ | □ | □ | CAMK/RAD53 protein<br>kinase         | PF07714.10 | Pkinase_Tyr(Protein tyrosine<br>kinase)                                  |
| Supercontig_1.74_MV<br>LG_05465_8sp  | -615,95199 | -615,95171 | 0,00056 | 0,00028 | NS | 0 | □ | □ | □ | T-complex protein 1<br>subunit gamma | TIGR02344  | TIGR02344(chap_CCT_gamma:<br>T-complex protein 1, gamma<br>subunit)      |
| Supercontig_1.11_MV<br>LG_01687_8sp  | -708,64329 | -708,64299 | 0,0006  | 0,0003  | NS | 0 | □ | □ | □ | hypothetical protein                 | PF03151.9  | TPT(Triose-phosphate<br>Transporter family)                              |
| Supercontig_1.202_MV<br>LG_07091_6sp | -820,91335 | -819,29639 | 3,23392 | 0,8015  | NS | 0 | □ | □ | □ | hypothetical protein                 | PF01073.12 | 3Beta_HSD(3-beta<br>hydroxysteroid<br>dehydrogenase/isomerase<br>family) |
| Supercontig_1.38_MV<br>LG_03774_9sp  | -1547,6102 | -1547,605  | 0,01048 | 0,00523 | NS | 0 | □ | □ | □ | hypothetical protein                 | PF07250.4  | Glyoxal_oxid_N(Glyoxal oxidase<br>N-terminus)                            |
| Supercontig_1.7_MVL<br>G_01270_9sp   | -441,23791 | -441,23791 | 0       | 0       | NS | 0 | □ | □ | □ | hypothetical protein                 | PF00505.12 | HMG_box(HMG (high mobility<br>group) box)                                |
| Supercontig_1.18_MV<br>LG_02396_8sp  | -575,47767 | -575,47765 | 0,00016 | 0,00016 | NS | 0 | □ | □ | □ | hypothetical protein                 | PF09429.3  | Wbp11(WW domain binding<br>protein 11)                                   |
| Supercontig_1.17_MV<br>LG_02332_6sp  | -299,64977 | -299,64975 | 0,00016 | 0,00016 | NS | 0 | □ | □ | □ | hypothetical protein                 | NA         | NA                                                                       |
| Supercontig_1.202_MV<br>LG_07094_8sp | -283,10141 | -283,10141 | 0       | 0       | NS | 0 | □ | □ | □ | hypothetical protein                 | PF00248.14 | Aldo_ket_red(Aldo/keto<br>reductase family)                              |
| Supercontig_1.63_MV<br>LG_05069_6sp  | -417,45839 | -417,45839 | 0       | 0       | NS | 0 | □ | □ | □ | hypothetical protein                 | NA         | NA                                                                       |
| Supercontig_1.1_MVL<br>G_00211_6sp   | -733,96471 | -733,96471 | 0       | 0       | NS | 0 | □ | □ | □ | hypothetical protein                 | PF03061.15 | 4HBT(Thioesterase superfamily)                                           |
| Supercontig_1.191_MV<br>LG_07048_9sp | -380,51935 | -380,11108 | 0,81654 | 0,3352  | NS | 0 | □ | □ | □ | hypothetical protein                 | TIGR00800  | TIGR00800(ncs1: NCS1<br>nucleoside transporter family)                   |
| Supercontig_1.2_MVL<br>G_00364_11sp  | -710,64252 | -710,64252 | 0       | 0       | NS | 0 | □ | □ | □ | hypothetical protein                 | NA         | NA                                                                       |

|                                      |            |            |         |         |    |   |   |   |   |                                          |            |                                                                  |
|--------------------------------------|------------|------------|---------|---------|----|---|---|---|---|------------------------------------------|------------|------------------------------------------------------------------|
| Supercontig_1.76_MV<br>LG_05521_7sp  | -851,15132 | -851,15093 | 0,00078 | 0,00039 | NS | 0 | 0 | 0 | 0 | hypothetical protein                     | TIGR02251  | TIGR02251(HIF-SF_euk: Dullard-like phosphatase domain)           |
| Supercontig_1.88_MV<br>LG_05898_8sp  | -642,48351 | -642,48351 | 0       | 0       | NS | 0 | 0 | 0 | 0 | translation initiation factor eIF-5      | PF02020.11 | W2(eIF4-gamma/eIF5/eIF2-epsilon)                                 |
| Supercontig_1.45_MV<br>LG_04189_11sp | -448,54715 | -448,54715 | 0       | 0       | NS | 0 | 0 | 0 | 0 | DNAJ chaparonin                          | PF00226.24 | DnaJ(DnaJ domain)                                                |
| Supercontig_1.74_MV<br>LG_05452_12sp | -298,49154 | -298,06102 | 0,86104 | 0,34983 | NS | 0 | 0 | 0 | 0 | hypothetical protein                     | TIGR00378  | TIGR00378(cax: calcium/proton exchanger)                         |
| Supercontig_1.23_MV<br>LG_02799_9sp  | -706,72941 | -706,72941 | 0       | 0       | NS | 0 | 0 | 0 | 0 | hypothetical protein                     | PF00400.25 | WD40(WD domain, G-beta repeat)                                   |
| Supercontig_1.55_MV<br>LG_04703_8sp  | -1543,7933 | -1543,7933 | 0       | 0       | NS | 0 | 0 | 0 | 0 | phosphoribosylformylglycinamide synthase | TIGR01735  | TIGR01735(FGAM_synt: phosphoribosylformylglycinamide synthase)   |
| Supercontig_1.4_MVL<br>G_00745_12sp  | -403,95028 | -403,58361 | 0,73334 | 0,30696 | NS | 0 | 0 | 0 | 0 | hypothetical protein                     | PF00561.13 | Abhydrolase_1(alpha/beta hydrolase fold)                         |
| Supercontig_1.25_MV<br>LG_02919_10sp | -861,93354 | -861,14724 | 1,5726  | 0,54447 | NS | 0 | 0 | 0 | 0 | hypothetical protein                     | PF00010.19 | HLH(Helix-loop-helix DNA-binding domain)                         |
| Supercontig_1.66_MV<br>LG_05160_8sp  | -413,99877 | -413,99736 | 0,00282 | 0,00141 | NS | 0 | 0 | 0 | 0 | hypothetical protein                     | PF01494.12 | FAD_binding_3(FAD binding domain)                                |
| Supercontig_1.22_MV<br>LG_02703_12sp | -375,74677 | -375,74677 | 0       | 0       | NS | 0 | 0 | 0 | 0 | hypothetical protein                     | NA         | NA                                                               |
| Supercontig_1.1_MVL<br>G_00251_9sp   | -447,95404 | -447,95379 | 0,0005  | 0,00025 | NS | 0 | 0 | 0 | 0 | hypothetical protein                     | TIGR00798  | TIGR00798(mtc: tricarboxylate carrier)                           |
| Supercontig_1.63_MV<br>LG_05047_9sp  | -690,22817 | -690,22802 | 0,0003  | 0,00015 | NS | 0 | 0 | 0 | 0 | adenylosuccinate synthetase              | TIGR00184  | TIGR00184(purA: adenylosuccinate synthase)                       |
| Supercontig_1.16_MV<br>LG_02213_9sp  | -512,20936 | -512,20936 | 0       | 0       | NS | 0 | 0 | 0 | 0 | hypothetical protein                     | NA         | NA                                                               |
| Supercontig_1.78_MV<br>LG_05577_9sp  | -403,81964 | -403,81964 | 0       | 0       | NS | 0 | 0 | 0 | 0 | hypothetical protein                     | PF03153.6  | TFIIA(Transcription factor IIA, alpha/beta subunit)              |
| Supercontig_1.16_MV<br>LG_02249_9sp  | -677,32812 | -677,32812 | 0       | 0       | NS | 0 | 0 | 0 | 0 | hypothetical protein                     | NA         | NA                                                               |
| Supercontig_1.80_MV<br>LG_05660_6sp  | -705,82429 | -705,82429 | 0       | 0       | NS | 0 | 0 | 0 | 0 | hypothetical protein                     | PF09996.2  | DUF2237(Uncharacterized protein conserved in bacteria (DUF2237)) |
| Supercontig_1.12_MV<br>LG_01847_8sp  | -402,33429 | -402,33413 | 0,00032 | 0,00016 | NS | 0 | 0 | 0 | 0 | transcription elongation factor SPT4     | PF06093.6  | Spt4(Spt4/RpoE2 zinc finger)                                     |
| Supercontig_1.85_MV<br>LG_05811_9sp  | -1176,267  | -1176,2668 | 0,00036 | 0,00018 | NS | 0 | 0 | 0 | 0 | pre-mRNA-processing-splicing factor 8    | PF12134.1  | PRP8_domainIV(PRNP8 domain IV core)                              |
| Supercontig_1.1_MVL<br>G_00112_8sp   | -507,21188 | -507,19654 | 0,03068 | 0,01522 | NS | 0 | 0 | 0 | 0 | hypothetical protein                     | NA         | NA                                                               |
| Supercontig_1.142_MV<br>LG_06703_7sp | -571,14253 | -570,10855 | 2,06796 | 0,64441 | NS | 0 | 0 | 0 | 0 | hypothetical protein                     | PF00755.13 | Carn_acyltransf(Choline/Carnitine o-acyltransferase)             |
| Supercontig_1.1_MVL<br>G_00090_7sp   | -1023,9207 | -1023,9207 | 0       | 0       | NS | 0 | 0 | 0 | 0 | hypothetical protein                     | PF03372.16 | Exo_endo_phos(Endonuclease/Exonuclease/phosphatase family)       |
| Supercontig_1.79_MV<br>LG_05626_8sp  | -627,43389 | -626,82047 | 1,22684 | 0,4585  | NS | 0 | 0 | 0 | 0 | hypothetical protein                     | PF09531.3  | Ndc1_Nup(Nucleoporin protein Ndc1-Nup)                           |
| Supercontig_1.4_MVL<br>G_00755_10sp  | -1100,6995 | -1100,2524 | 0,89408 | 0,36048 | NS | 0 | 0 | 0 | 0 | hypothetical protein                     | PF05021.8  | NPL4(NPL4 family)                                                |



|                                       |            |            |         |         |    |   |  |  |  |  |                      |            |                                                                 |
|---------------------------------------|------------|------------|---------|---------|----|---|--|--|--|--|----------------------|------------|-----------------------------------------------------------------|
| Supercontig_1.8_MVL<br>G_01361_9sp    | -483,08065 | -482,82784 | 0,50562 | 0,22338 | NS | 0 |  |  |  |  | hypothetical protein | NA         | NA                                                              |
| Supercontig_1.24_MV<br>LG_02849_11sp  | -418,80716 | -416,4259  | 4,76252 | 0,90757 | *  | 0 |  |  |  |  | hypothetical protein | PF00172.11 | Zn_clus(Fungal Zn(2)-Cys(6) binuclear cluster domain)           |
| Supercontig_1.33_MV<br>LG_03462_7sp   | -473,41757 | -473,32821 | 0,17872 | 0,08548 | NS | 0 |  |  |  |  | hypothetical protein | NA         | NA                                                              |
| Supercontig_1.15_MV<br>LG_02093_8sp   | -531,69106 | -531,39131 | 0,5995  | 0,259   | NS | 0 |  |  |  |  | hypothetical protein | PF01169.12 | UPF0016(Uncharacterized protein family UPF0016)                 |
| Supercontig_1.33_MV<br>LG_03488_10sp  | -287,96979 | -287,92412 | 0,09134 | 0,04464 | NS | 0 |  |  |  |  | hypothetical protein | TIGR00728  | TIGR00728(OPT_sfam: oligopeptide transporters, OPT superfamily) |
| Supercontig_1.24_MV<br>LG_02887_9sp   | -633,05338 | -633,05338 | 0       | 0       | NS | 0 |  |  |  |  | hypothetical protein | PF00735.11 | Septin(Septin)                                                  |
| Supercontig_1.87_MV<br>LG_05862_7sp   | -645,81122 | -645,42266 | 0,77712 | 0,32197 | NS | 0 |  |  |  |  | hypothetical protein | PF03909.10 | BSD(BSD domain)                                                 |
| Supercontig_1.29_MV<br>LG_03245_9sp   | -582,09501 | -582,09501 | 0       | 0       | NS | 0 |  |  |  |  | hypothetical protein | NA         | NA                                                              |
| Supercontig_1.8_MVL<br>G_01462_7sp    | -1194,495  | -1194,495  | 0       | 0       | NS | 0 |  |  |  |  | hypothetical protein | PF02463.12 | SMC_N(RecF/RecN/SMC N terminal domain)                          |
| Supercontig_1.47_MV<br>LG_04317_9sp   | -480,36757 | -480,36757 | 0       | 0       | NS | 0 |  |  |  |  | hypothetical protein | NA         | NA                                                              |
| Supercontig_1.204_MV<br>LG_07104_11sp | -456,81185 | -456,81169 | 0,00032 | 0,00016 | NS | 0 |  |  |  |  | hypothetical protein | PF10273.2  | WGG(Pre-rRNA-processing protein TSR2)                           |
| Supercontig_1.91_MV<br>LG_05943_9sp   | -605,40449 | -604,91351 | 0,98196 | 0,38797 | NS | 0 |  |  |  |  | hypothetical protein | NA         | NA                                                              |
| Supercontig_1.33_MV<br>LG_03446_12sp  | -461,67058 | -461,67026 | 0,00064 | 0,00032 | NS | 0 |  |  |  |  | hypothetical protein | PF04515.5  | Choline_transpo(Plasma-membrane choline transporter)            |
| Supercontig_1.12_MV<br>LG_01856_8sp   | -838,86793 | -838,52003 | 0,6958  | 0,29383 | NS | 0 |  |  |  |  | hypothetical protein | NA         | NA                                                              |
| Supercontig_1.42_MV<br>LG_04084_9sp   | -1106,0812 | -1106,0812 | 0       | 0       | NS | 0 |  |  |  |  | hypothetical protein | PF02735.9  | Ku(Ku70/Ku80 beta-barrel domain)                                |
| Supercontig_1.21_MV<br>LG_02627_10sp  | -587,22915 | -586,47347 | 1,51136 | 0,53031 | NS | 0 |  |  |  |  | hypothetical protein | PF10513.2  | EPL1(Enhancer of polycomb-like)                                 |
| Supercontig_1.44_MV<br>LG_04140_12sp  | -905,22268 | -905,22264 | 0,00016 | 0,00016 | NS | 0 |  |  |  |  | hypothetical protein | NA         | NA                                                              |
| Supercontig_1.102_MV<br>LG_06177_10sp | -406,7843  | -406,7843  | 0       | 0       | NS | 0 |  |  |  |  | hypothetical protein | PF08242.5  | Methyltransf_12(Methyltransferase domain)                       |
| Supercontig_1.54_MV<br>LG_04680_9sp   | -523,2359  | -523,16992 | 0,13196 | 0,06385 | NS | 0 |  |  |  |  | hypothetical protein | NA         | NA                                                              |
| Supercontig_1.1_MVL<br>G_00247_10sp   | -360,2484  | -360,16761 | 0,16158 | 0,07761 | NS | 0 |  |  |  |  | hypothetical protein | PF09273.4  | Rubis-subst-bind(Rubisco LSMT substrate-binding)                |
| Supercontig_1.6_MVL<br>G_01222_8sp    | -598,45169 | -598,45169 | 0       | 0       | NS | 0 |  |  |  |  | hypothetical protein | PF00248.14 | Aldo_ket_red(Aldo/keto reductase family)                        |
| Supercontig_1.81_MV<br>LG_05672_8sp   | -1156,3369 | -1156,3369 | 0       | 0       | NS | 0 |  |  |  |  | hypothetical protein | PF07690.9  | MFS_1(Major Facilitator Superfamily)                            |
| Supercontig_1.9_MVL<br>G_01491_10sp   | -411,88448 | -411,65101 | 0,46694 | 0,20822 | NS | 0 |  |  |  |  | hypothetical protein | PF07992.7  | Pyr_redox_2(Pyridine nucleotide-disulphide oxidoreductase)      |
| Supercontig_1.78_MV<br>LG_05585_9sp   | -859,03183 | -857,81569 | 2,43228 | 0,70363 | NS | 0 |  |  |  |  | hypothetical protein | TIGR02734  | TIGR02734(crtI_fam: phytoene desaturase)                        |

|                                       |            |            |         |         |    |   |   |   |   |                                                 |            |                                                                             |
|---------------------------------------|------------|------------|---------|---------|----|---|---|---|---|-------------------------------------------------|------------|-----------------------------------------------------------------------------|
| Supercontig_1.9_MVL<br>G_01534_9sp    | -824,99498 | -824,99494 | 0,00016 | 0,00016 | NS | 0 | 0 | 0 | 0 | hypothetical protein                            | PF03372.16 | Exo_endo_phos(Endonuclease/<br>Exonuclease/phosphatase<br>family)           |
| Supercontig_1.3_MVL<br>G_00616_10sp   | -425,30354 | -425,30341 | 0,00026 | 0,00013 | NS | 0 | 0 | 0 | 0 | hypothetical protein                            | PF04851.8  | ResIII(Type III restriction<br>enzyme, res subunit)                         |
| Supercontig_1.19_MV<br>LG_02495_8sp   | -707,68424 | -707,68424 | 0       | 0       | NS | 0 | 0 | 0 | 0 | hypothetical protein                            | PF07690.9  | MFS_1(Major Facilitator<br>Superfamily)                                     |
| Supercontig_1.1_MVL<br>G_00239_8sp    | -400,19306 | -400,19306 | 0       | 0       | NS | 0 | 0 | 0 | 0 | hypothetical protein                            | PF12348.1  | CLASP_N(CLASP N terminal)                                                   |
| Supercontig_1.11_MV<br>LG_01696_7sp   | -559,35979 | -559,17616 | 0,36726 | 0,16776 | NS | 0 | 0 | 0 | 0 | hypothetical protein                            | NA         | NA                                                                          |
| Supercontig_1.38_MV<br>LG_03769_8sp   | -385,50268 | -385,50135 | 0,00266 | 0,00133 | NS | 0 | 0 | 0 | 0 | translationally-<br>controlled tumor<br>protein | PF00838.10 | TCTP(Translationally controlled<br>tumour protein)                          |
| Supercontig_1.12_MV<br>LG_01870_11sp  | -576,59361 | -576,59325 | 0,00072 | 0,00036 | NS | 0 | 0 | 0 | 0 | hypothetical protein                            | PF09440.3  | eIF3_N(eIF3 subunit 6 N terminal<br>domain)                                 |
| Supercontig_1.6_MVL<br>G_01116_7sp    | -591,31171 | -591,31171 | 0       | 0       | NS | 0 | 0 | 0 | 0 | hypothetical protein                            | PF00018.21 | SH3_1(SH3 domain)                                                           |
| Supercontig_1.3_MVL<br>G_00664_11sp   | -449,61052 | -449,71549 | 0       | 0       | NS | 0 | 0 | 0 | 0 | hypothetical protein                            | PF01602.13 | Adaptin_N(Adaptin N terminal<br>region)                                     |
| Supercontig_1.24_MV<br>LG_02860_8sp   | -312,25706 | -312,25702 | 0,00016 | 0,00016 | NS | 0 | 0 | 0 | 0 | hypothetical protein                            | PF10791.2  | F1F0-ATPsyn_F(Mitochondrial<br>F1-F0 ATP synthase subunit F of<br>fungi)    |
| Supercontig_1.67_MV<br>LG_05238_8sp   | -859,29822 | -859,29822 | 0       | 0       | NS | 0 | 0 | 0 | 0 | hypothetical protein                            | PF07724.7  | AAA_2(AAA domain (Cdc48<br>subfamily))                                      |
| Supercontig_1.149_MV<br>LG_06768_9sp  | -1168,5388 | -1168,5388 | 0       | 0       | NS | 0 | 0 | 0 | 0 | hypothetical protein                            | PF08327.4  | AHSA1(Activator of Hsp90<br>ATPase homolog 1-like protein)                  |
| Supercontig_1.27_MV<br>LG_03125_10sp  | -412,36974 | -412,36963 | 0,00022 | 0,00011 | NS | 0 | 0 | 0 | 0 | histidyl-tRNA<br>synthetase                     | PF00587.18 | tRNA-synt_2b(tRNA synthetase<br>class II core domain (G, H, P, S<br>and T)) |
| Supercontig_1.11_MV<br>LG_01728_10sp  | -503,51463 | -503,48496 | 0,05934 | 0,02923 | NS | 0 | 0 | 0 | 0 | hypothetical protein                            | NA         | NA                                                                          |
| Supercontig_1.63_MV<br>LG_05054_6sp   | -1239,533  | -1239,4474 | 0,1712  | 0,08204 | NS | 0 | 0 | 0 | 0 | hypothetical protein                            | PF00172.11 | Zn_clus(Fungal Zn(2)-Cys(6)<br>binuclear cluster domain)                    |
| Supercontig_1.191_MV<br>LG_07044_11sp | -382,10582 | -382,10575 | 0,00014 | 0,00016 | NS | 0 | 0 | 0 | 0 | hypothetical protein                            | PF00450.15 | Peptidase_S10(Serine<br>carboxypeptidase)                                   |
| Supercontig_1.30_MV<br>LG_03264_12sp  | -344,20257 | -344,20257 | 0       | 0       | NS | 0 | 0 | 0 | 0 | hypothetical protein                            | PF00171.15 | Aldedh(Aldehyde dehydrogenase<br>family)                                    |
| Supercontig_1.45_MV<br>LG_04204_6sp   | -549,12091 | -549,12091 | 0       | 0       | NS | 0 | 0 | 0 | 0 | hypothetical protein                            | NA         | NA                                                                          |
| Supercontig_1.27_MV<br>LG_03123_8sp   | -457,62077 | -457,6206  | 0,00034 | 0,00017 | NS | 0 | 0 | 0 | 0 | hypothetical protein                            | PF01529.13 | zf-DHHC(DHHC zinc finger<br>domain)                                         |
| Supercontig_1.23_MV<br>LG_02777_12sp  | -583,80229 | -583,80229 | 0       | 0       | NS | 0 | 0 | 0 | 0 | hypothetical protein                            | PF00621.13 | RhoGEF(RhoGEF domain)                                                       |
| Supercontig_1.87_MV<br>LG_05851_7sp   | -709,50866 | -709,21955 | 0,57822 | 0,25107 | NS | 0 | 0 | 0 | 0 | hypothetical protein                            | NA         | NA                                                                          |
| Supercontig_1.39_MV<br>LG_03849_11sp  | -657,05009 | -657,05009 | 0       | 0       | NS | 0 | 0 | 0 | 0 | hypothetical protein                            | PF00076.15 | RRM_1(RNA recognition motif.<br>(a.k.a. RRM, RBD, or RNP<br>domain))        |

|                                      |            |            |         |         |    |   |  |  |  |  |                                                  |            |                                                                                 |
|--------------------------------------|------------|------------|---------|---------|----|---|--|--|--|--|--------------------------------------------------|------------|---------------------------------------------------------------------------------|
| Supercontig_1.36_MV<br>LG_03640_9sp  | -566,90511 | -566,78713 | 0,23596 | 0,11129 | NS | 0 |  |  |  |  | hypothetical protein                             | PF04828.7  | GFA(Glutathione-dependent formaldehyde-activating enzyme)                       |
| Supercontig_1.13_MV<br>LG_01915_10sp | -570,48205 | -570,48205 | 0       | 0       | NS | 0 |  |  |  |  | hypothetical protein                             | PF05964.7  | FYRN(F/Y-rich N-terminus)                                                       |
| Supercontig_1.9_MVL<br>G_01522_9sp   | -483,84728 | -483,84693 | 0,0007  | 0,00035 | NS | 0 |  |  |  |  | hypothetical protein                             | PF04133.7  | Vps55(Vacuolar protein sorting 55)                                              |
| Supercontig_1.24_MV<br>LG_02858_9sp  | -332,05733 | -332,05693 | 0,0008  | 0,0004  | NS | 0 |  |  |  |  | ADP-ribosylation factor 1                        | PF04670.5  | Gtr1_RagA(Gtr1/RagA G protein conserved region)                                 |
| Supercontig_1.9_MVL<br>G_01568_9sp   | -1214,9444 | -1214,8822 | 0,12446 | 0,06033 | NS | 0 |  |  |  |  | hypothetical protein                             | PF06011.5  | TRP(Transient receptor potential (TRP) ion channel)                             |
| Supercontig_1.57_MV<br>LG_04817_8sp  | -1508,4863 | -1507,6353 | 1,70202 | 0,57302 | NS | 0 |  |  |  |  | hypothetical protein                             | PF04130.6  | Spc97_Spc98(Spc97 / Spc98 family)                                               |
| Supercontig_1.67_MV<br>LG_05224_9sp  | -525,67096 | -525,67067 | 0,00058 | 0,00029 | NS | 0 |  |  |  |  | hypothetical protein                             | PF08953.4  | DUF1899(Domain of unknown function (DUF1899))                                   |
| Supercontig_1.45_MV<br>LG_04236_10sp | -1476,3206 | -1476,3206 | 0       | 0       | NS | 0 |  |  |  |  | guanine nucleotide-binding protein subunit alpha | PF00025.14 | Arf(ADP-ribosylation factor family)                                             |
| Supercontig_1.12_MV<br>LG_01844_9sp  | -565,3086  | -565,20235 | 0,2125  | 0,1008  | NS | 0 |  |  |  |  | hypothetical protein                             | NA         | NA                                                                              |
| Supercontig_1.19_MV<br>LG_02440_9sp  | -876,60297 | -874,34552 | 4,5149  | 0,89538 | NS | 0 |  |  |  |  | hypothetical protein                             | NA         | NA                                                                              |
| Supercontig_1.1_MVL<br>G_00142_12sp  | -620,18963 | -620,18963 | 0       | 0       | NS | 0 |  |  |  |  | hypothetical protein                             | PF04488.8  | Gly_transf_sug(Glycosyltransferase sugar-binding region containing DXD motif)   |
| Supercontig_1.25_MV<br>LG_02976_9sp  | -903,5847  | -903,18242 | 0,80456 | 0,33121 | NS | 0 |  |  |  |  | hypothetical protein                             | NA         | NA                                                                              |
| Supercontig_1.73_MV<br>LG_05431_6sp  | -1267,1549 | -1267,1549 | 0       | 0       | NS | 0 |  |  |  |  | hypothetical protein                             | NA         | NA                                                                              |
| Supercontig_1.22_MV<br>LG_02731_8sp  | -727,7287  | -727,7287  | 0       | 0       | NS | 0 |  |  |  |  | hypothetical protein                             | PF00106.18 | adh_short(short chain dehydrogenase)                                            |
| Supercontig_1.79_MV<br>LG_05622_6sp  | -482,42232 | -482,38839 | 0,06786 | 0,03336 | NS | 0 |  |  |  |  | hypothetical protein                             | PF01161.13 | PBP(Phosphatidylethanolamine-binding protein)                                   |
| Supercontig_1.46_MV<br>LG_04296_11sp | -533,92828 | -533,86791 | 0,12074 | 0,05858 | NS | 0 |  |  |  |  | hypothetical protein                             | PF07576.5  | BRAP2(BRCA1-associated protein 2)                                               |
| Supercontig_1.22_MV<br>LG_02697_9sp  | -686,67098 | -686,63464 | 0,07268 | 0,03569 | NS | 0 |  |  |  |  | hypothetical protein                             | PF00173.21 | Cyt-b5(Cytochrome b5-like Heme/Steroid binding domain)                          |
| Supercontig_1.2_MVL<br>G_00451_11sp  | -440,31413 | -440,31413 | 0       | 0       | NS | 0 |  |  |  |  | hypothetical protein                             | PF08801.4  | Nucleoporin_N(Nup133 N terminal like)                                           |
| Supercontig_1.76_MV<br>LG_05518_11sp | -343,70344 | -343,70327 | 0,00034 | 0,00017 | NS | 0 |  |  |  |  | hypothetical protein                             | NA         | NA                                                                              |
| Supercontig_1.2_MVL<br>G_00463_8sp   | -541,53111 | -541,53102 | 0,00018 | 0,00016 | NS | 0 |  |  |  |  | hypothetical protein                             | NA         | NA                                                                              |
| Supercontig_1.87_MV<br>LG_05844_7sp  | -538,38023 | -538,38014 | 0,00018 | 0,00016 | NS | 0 |  |  |  |  | formate dehydrogenase                            | PF02826.12 | 2-Hacid_dh_C(D-isomer specific 2-hydroxyacid dehydrogenase, NAD binding domain) |
| Supercontig_1.124_MV<br>LG_06486_9sp | -669,73682 | -668,77418 | 1,92528 | 0,61812 | NS | 0 |  |  |  |  | hypothetical protein                             | NA         | NA                                                                              |
| Supercontig_1.175_MV<br>LG_06972_8sp | -561,02688 | -561,02688 | 0       | 0       | NS | 0 |  |  |  |  | hypothetical protein                             | PF01738.11 | DLH(Dienelactone hydrolase family)                                              |

|                                       |            |            |         |         |    |   |  |  |  |  |                                  |            |                                                                   |
|---------------------------------------|------------|------------|---------|---------|----|---|--|--|--|--|----------------------------------|------------|-------------------------------------------------------------------|
| Supercontig_1.1_MVL<br>G_00188_10sp   | -558,87618 | -557,80208 | 2,1482  | 0,65839 | NS | 0 |  |  |  |  | hypothetical protein             | PF05686.5  | DUF821(Arabidopsis thaliana protein of unknown function (DUF821)) |
| Supercontig_1.3_MVL<br>G_00529_9sp    | -727,87675 | -727,32473 | 1,10404 | 0,42421 | NS | 0 |  |  |  |  | hypothetical protein             | NA         | NA                                                                |
| Supercontig_1.57_MV<br>LG_04834_10sp  | -589,55344 | -588,3585  | 2,38988 | 0,69728 | NS | 0 |  |  |  |  | hypothetical protein             | NA         | NA                                                                |
| Supercontig_1.8_MVL<br>G_01437_10sp   | -597,20482 | -597,20482 | 0       | 0       | NS | 0 |  |  |  |  | hypothetical protein             | TIGR00720  | TIGR00720(sda_mono: L-serine ammonia-lyase)                       |
| Supercontig_1.56_MV<br>LG_04764_7sp   | -810,31435 | -810,17289 | 0,28292 | 0,13191 | NS | 0 |  |  |  |  | hypothetical protein             | NA         | NA                                                                |
| Supercontig_1.154_MV<br>LG_06812_8sp  | -847,77072 | -847,77026 | 0,00092 | 0,00046 | NS | 0 |  |  |  |  | tubulin gamma chain              | PF10644.2  | Misat_Myo_SegII(Misato Segment II myosin-like domain)             |
| Supercontig_1.6_MVL<br>G_01205_11sp   | -427,08131 | -427,08119 | 0,00024 | 0,00012 | NS | 0 |  |  |  |  | hypothetical protein             | PF00620.20 | RhoGAP(RhoGAP domain)                                             |
| Supercontig_1.40_MV<br>LG_03953_10sp  | -648,49472 | -648,49472 | 0       | 0       | NS | 0 |  |  |  |  | hypothetical protein             | NA         | NA                                                                |
| Supercontig_1.98_MV<br>LG_06077_11sp  | -536,94813 | -536,94813 | 0       | 0       | NS | 0 |  |  |  |  | hypothetical protein             | PF07690.9  | MFS_1(Major Facilitator Superfamily)                              |
| Supercontig_1.11_MV<br>LG_01752_11sp  | -361,17451 | -360,9385  | 0,47202 | 0,21023 | NS | 0 |  |  |  |  | hypothetical protein             | NA         | NA                                                                |
| Supercontig_1.30_MV<br>LG_03277_9sp   | -482,74398 | -481,97938 | 1,5292  | 0,53448 | NS | 0 |  |  |  |  | hypothetical protein             | PF02037.20 | SAP(SAP domain)                                                   |
| Supercontig_1.99_MV<br>LG_06118_12sp  | -659,51476 | -659,51476 | 0       | 0       | NS | 0 |  |  |  |  | protein pyrABCN                  | PF02222.15 | ATP-grasp(ATP-grasp domain)                                       |
| Supercontig_1.85_MV<br>LG_05816_8sp   | -886,77774 | -886,77774 | 0       | 0       | NS | 0 |  |  |  |  | hypothetical protein             | PF02373.15 | JmjC(JmjC domain)                                                 |
| Supercontig_1.5_MVL<br>G_00980_6sp    | -605,62813 | -602,69916 | 5,85794 | 0,94655 | *  | 0 |  |  |  |  | mitochondrial peroxiredoxin PRX1 | PF10417.2  | 1-cysPrx_C(C-terminal domain of 1-Cys peroxiredoxin)              |
| Supercontig_1.142_MV<br>LG_06705_10sp | -1810,3361 | -1810,3361 | 0       | 0       | NS | 0 |  |  |  |  | hypothetical protein             | PF08161.5  | NUC173(NUC173 domain)                                             |
| Supercontig_1.78_MV<br>LG_05598_10sp  | -1137,5156 | -1137,515  | 0,00134 | 0,00067 | NS | 0 |  |  |  |  | hypothetical protein             | PF00128.17 | Alpha-amylase(Alpha amylase, catalytic domain)                    |
| Supercontig_1.11_MV<br>LG_01735_6sp   | -446,57239 | -446,21283 | 0,71912 | 0,30202 | NS | 0 |  |  |  |  | hypothetical protein             | PF00578.14 | AhpC-TSA(AhpC/TSA family)                                         |
| Supercontig_1.36_MV<br>LG_03657_8sp   | -1261,5291 | -1260,4915 | 2,07526 | 0,64571 | NS | 0 |  |  |  |  | hypothetical protein             | PF01061.17 | ABC2_membrane(ABC-2 type transporter)                             |
| Supercontig_1.55_MV<br>LG_04747_10sp  | -998,43527 | -995,30395 | 6,26264 | 0,95634 | ** | 0 |  |  |  |  | hypothetical protein             | PF01388.14 | ARID(ARID/BRIGHT DNA binding domain)                              |
| Supercontig_1.5_MVL<br>G_01000_10sp   | -1707,6743 | -1707,4241 | 0,50038 | 0,22135 | NS | 0 |  |  |  |  | hypothetical protein             | PF00498.19 | FHA(FHA domain)                                                   |
| Supercontig_1.77_MV<br>LG_05554_9sp   | -1079,7937 | -1079,7937 | 0       | 0       | NS | 0 |  |  |  |  | hypothetical protein             | PF01697.20 | DUF23(Domain of unknown function)                                 |
| Supercontig_1.7_MVL<br>G_01231_11sp   | -651,37497 | -651,37482 | 0,0003  | 0,00015 | NS | 0 |  |  |  |  | valyl-tRNA synthetase            | TIGR00422  | TIGR00422(valS: valine--tRNA ligase)                              |
| Supercontig_1.5_MVL<br>G_00938_7sp    | -324,95907 | -324,95898 | 0,00018 | 0,00016 | NS | 0 |  |  |  |  | homoisocitrate dehydrogenase     | PF00180.13 | Iso_dh(Isocitrate/isopropylmalate dehydrogenase)                  |
| Supercontig_1.6_MVL<br>G_01089_8sp    | -715,74728 | -715,74702 | 0,00052 | 0,00026 | NS | 0 |  |  |  |  | hypothetical protein             | NA         | NA                                                                |

|                                       |            |            |         |         |    |   |   |   |   |   |   |   |                                             |            |                                                                    |
|---------------------------------------|------------|------------|---------|---------|----|---|---|---|---|---|---|---|---------------------------------------------|------------|--------------------------------------------------------------------|
| Supercontig_1.39_MV<br>LG_03895_9sp   | -479,7815  | -479,7815  | 0       | 0       | NS | 0 | 0 | 0 | 0 | 0 | 0 | 0 | hypothetical protein                        | NA         | NA                                                                 |
| Supercontig_1.42_MV<br>LG_04074_6sp   | -510,92029 | -510,62189 | 0,5968  | 0,258   | NS | 0 | 0 | 0 | 0 | 0 | 0 | 0 | hypothetical protein                        | NA         | NA                                                                 |
| Supercontig_1.20_MV<br>LG_02565_9sp   | -469,7215  | -469,7213  | 0,0004  | 0,0002  | NS | 0 | 0 | 0 | 0 | 0 | 0 | 0 | hypothetical protein                        | PF10331.2  | AlcB(Siderophore biosynthesis protein domain)                      |
| Supercontig_1.131_MV<br>LG_06577_9sp  | -578,90253 | -578,90253 | 0       | 0       | NS | 0 | 0 | 0 | 0 | 0 | 0 | 0 | hypothetical protein                        | NA         | NA                                                                 |
| Supercontig_1.141_MV<br>LG_06694_10sp | -812,08421 | -810,54375 | 3,08092 | 0,78572 | NS | 0 | 0 | 0 | 0 | 0 | 0 | 0 | hypothetical protein                        | NA         | NA                                                                 |
| Supercontig_1.69_MV<br>LG_05285_9sp   | -468,94238 | -468,63918 | 0,6064  | 0,26155 | NS | 0 | 0 | 0 | 0 | 0 | 0 | 0 | thioredoxin reductase                       | PF00070.20 | Pyr_redox(Pyridine nucleotide-disulphide oxidoreductase)           |
| Supercontig_1.2_MVL<br>G_00286_10sp   | -1525,3521 | -1525,3521 | 0       | 0       | NS | 0 | 0 | 0 | 0 | 0 | 0 | 0 | hypothetical protein                        | PF00439.18 | Bromodomain(Bromodomain)                                           |
| Supercontig_1.63_MV<br>LG_05068_7sp   | -348,31537 | -348,31533 | 0,00016 | 0,00016 | NS | 0 | 0 | 0 | 0 | 0 | 0 | 0 | pyruvate dehydrogenase [lipoamide] kinase   | PF02518.19 | HATPase_c(Histidine kinase-, DNA gyrase B-, and HSP90-like ATPase) |
| Supercontig_1.85_MV<br>LG_05792_10sp  | -416,78735 | -416,78721 | 0,00028 | 0,00014 | NS | 0 | 0 | 0 | 0 | 0 | 0 | 0 | 30S ribosomal protein S6                    | PF01250.10 | Ribosomal_S6(Ribosomal protein S6)                                 |
| Supercontig_1.6_MVL<br>G_01171_8sp    | -839,23423 | -839,16872 | 0,13102 | 0,06341 | NS | 0 | 0 | 0 | 0 | 0 | 0 | 0 | hypothetical protein                        | PF06423.5  | GWT1(GWT1)                                                         |
| Supercontig_1.74_MV<br>LG_05459_8sp   | -400,10479 | -398,74512 | 2,71934 | 0,74325 | NS | 0 | 0 | 0 | 0 | 0 | 0 | 0 | hypothetical protein                        | NA         | NA                                                                 |
| Supercontig_1.73_MV<br>LG_05405_10sp  | -503,63983 | -503,08925 | 1,10116 | 0,42338 | NS | 0 | 0 | 0 | 0 | 0 | 0 | 0 | sulfate adenylyltransferase                 | TIGR00455  | TIGR00455(apsK: adenylylsulfate kinase)                            |
| Supercontig_1.74_MV<br>LG_05454_10sp  | -404,50781 | -403,78053 | 1,45456 | 0,51678 | NS | 0 | 0 | 0 | 0 | 0 | 0 | 0 | hypothetical protein                        | PF03807.10 | F420_oxidored(NADP oxidoreductase coenzyme F420-dependent)         |
| Supercontig_1.34_MV<br>LG_03502_9sp   | -378,80212 | -378,80199 | 0,00026 | 0,00013 | NS | 0 | 0 | 0 | 0 | 0 | 0 | 0 | delta-aminolevulinic acid dehydratase       | PF00490.14 | ALAD(Delta-aminolevulinic acid dehydratase)                        |
| Supercontig_1.8_MVL<br>G_01380_8sp    | -1088,0819 | -1088,0819 | 0       | 0       | NS | 0 | 0 | 0 | 0 | 0 | 0 | 0 | hypothetical protein                        | PF02179.9  | BAG(BAG domain)                                                    |
| Supercontig_1.9_MVL<br>G_01572_10sp   | -389,15037 | -389,14921 | 0,00232 | 0,00116 | NS | 0 | 0 | 0 | 0 | 0 | 0 | 0 | 2-nitropropane dioxygenase                  | PF03060.8  | NPD(2-nitropropane dioxygenase)                                    |
| Supercontig_1.3_MVL<br>G_00546_10sp   | -758,42524 | -758,42524 | 0       | 0       | NS | 0 | 0 | 0 | 0 | 0 | 0 | 0 | hypothetical protein                        | PF03142.8  | Chitin_synth_2(Chitin synthase)                                    |
| Supercontig_1.31_MV<br>LG_03366_9sp   | -754,14901 | -753,68402 | 0,92998 | 0,37186 | NS | 0 | 0 | 0 | 0 | 0 | 0 | 0 | hypothetical protein                        | PF00856.21 | SET(SET domain)                                                    |
| Supercontig_1.107_MV<br>LG_06255_11sp | -860,35051 | -859,25998 | 2,18106 | 0,66396 | NS | 0 | 0 | 0 | 0 | 0 | 0 | 0 | hypothetical protein                        | PF09174.3  | Maf1(Maf1 regulator)                                               |
| Supercontig_1.6_MVL<br>G_01185_11sp   | -455,81104 | -455,81104 | 0       | 0       | NS | 0 | 0 | 0 | 0 | 0 | 0 | 0 | glutaryl-CoA dehydrogenase                  | PF02770.12 | Acyl-CoA_dh_M(Acyl-CoA dehydrogenase, middle domain)               |
| Supercontig_1.10_MV<br>LG_01586_9sp   | -583,08678 | -583,08665 | 0,00026 | 0,00013 | NS | 0 | 0 | 0 | 0 | 0 | 0 | 0 | hypothetical protein                        | PF00400.25 | WD40(WD domain, G-beta repeat)                                     |
| Supercontig_1.6_MVL<br>G_01213_8sp    | -821,17078 | -821,17078 | 0       | 0       | NS | 0 | 0 | 0 | 0 | 0 | 0 | 0 | UTP-glucose-1-phosphate uridylyltransferase | PF01704.11 | UDPGP(UTP--glucose-1-phosphate uridylyltransferase)                |
| Supercontig_1.5_MVL<br>G_01043_9sp    | -1045,8179 | -1045,8179 | 0       | 0       | NS | 0 | 0 | 0 | 0 | 0 | 0 | 0 | hypothetical protein                        | PF00667.13 | FAD_binding_1(FAD binding domain)                                  |
| Supercontig_1.57_MV<br>LG_04808_10sp  | -591,82559 | -591,82558 | 0,00016 | 0,00016 | NS | 0 | 0 | 0 | 0 | 0 | 0 | 0 | hypothetical protein                        | PF03647.6  | Tmemb_14(Transmembrane proteins 14C)                               |



|                                       |            |            |         |         |    |   |  |  |  |  |  |                                             |            |                                                                   |
|---------------------------------------|------------|------------|---------|---------|----|---|--|--|--|--|--|---------------------------------------------|------------|-------------------------------------------------------------------|
| Supercontig_1.7_MVL<br>G_01289_9sp    | -1459,4498 | -1456,3667 | 6,16632 | 0,95419 | ** | 0 |  |  |  |  |  | hypothetical protein                        | NA         | NA                                                                |
| Supercontig_1.105_MV<br>LG_06220_8sp  | -714,53362 | -712,63214 | 3,80296 | 0,85065 | NS | 0 |  |  |  |  |  | hypothetical protein                        | PF08613.4  | Cyclin(Cyclin)                                                    |
| Supercontig_1.10_MV<br>LG_01643_8sp   | -391,16663 | -391,30393 | 0       | 0       | NS | 0 |  |  |  |  |  | hypothetical protein                        | PF10237.2  | N6-adenineMlase(Probable N6-adenine methyltransferase)            |
| Supercontig_1.30_MV<br>LG_03300_9sp   | -360,91144 | -360,91128 | 0,00032 | 0,00016 | NS | 0 |  |  |  |  |  | pyruvate kinase                             | TIGR01064  | TIGR01064(pyruv_kin: pyruvate kinase)                             |
| Supercontig_1.99_MV<br>LG_06111_9sp   | -401,18111 | -400,40695 | 1,54832 | 0,53891 | NS | 0 |  |  |  |  |  | hypothetical protein                        | NA         | NA                                                                |
| Supercontig_1.18_MV<br>LG_02359_12sp  | -512,39019 | -512,13509 | 0,5102  | 0,22516 | NS | 0 |  |  |  |  |  | hypothetical protein                        | PF03542.9  | Tuberin(Tuberin)                                                  |
| Supercontig_1.33_MV<br>LG_03493_10sp  | -363,8672  | -363,86707 | 0,00026 | 0,00013 | NS | 0 |  |  |  |  |  | hypothetical protein                        | TIGR00177  | TIGR00177(molyb_syn: molybdenum cofactor synthesis domain)        |
| Supercontig_1.3_MVL<br>G_00637_10sp   | -479,84399 | -479,84399 | 0       | 0       | NS | 0 |  |  |  |  |  | hypothetical protein                        | PF00175.14 | NAD_binding_1(Oxidoreductase NAD-binding domain)                  |
| Supercontig_1.11_MV<br>LG_01709_10sp  | -417,17609 | -417,12871 | 0,09476 | 0,04628 | NS | 0 |  |  |  |  |  | hypothetical protein                        | NA         | NA                                                                |
| Supercontig_1.15_MV<br>LG_02081_11sp  | -1534,3415 | -1534,2575 | 0,16792 | 0,08053 | NS | 0 |  |  |  |  |  | hypothetical protein                        | NA         | NA                                                                |
| Supercontig_1.41_MV<br>LG_03991_10sp  | -914,24153 | -914,24123 | 0,0006  | 0,0003  | NS | 0 |  |  |  |  |  | methylenetetrahydrofolate reductase (NADPH) | TIGR00677  | TIGR00677(fadh2_euk: methylenetetrahydrofolate reductase)         |
| Supercontig_1.233_MV<br>LG_07194_7sp  | -896,4386  | -896,32495 | 0,2273  | 0,10743 | NS | 0 |  |  |  |  |  | hypothetical protein                        | PF01344.18 | Kelch_1(Kelch motif)                                              |
| Supercontig_1.66_MV<br>LG_05170_9sp   | -754,15306 | -752,40376 | 3,4986  | 0,8261  | NS | 0 |  |  |  |  |  | hypothetical protein                        | NA         | NA                                                                |
| Supercontig_1.44_MV<br>LG_04156_12sp  | -453,36401 | -453,00734 | 0,71334 | 0,3     | NS | 0 |  |  |  |  |  | hypothetical protein                        | PF05007.6  | Mannosyl_trans(Mannosyltransferase (PIG-M))                       |
| Supercontig_1.62_MV<br>LG_05042_10sp  | -278,91076 | -278,91072 | 0,00016 | 0,00016 | NS | 0 |  |  |  |  |  | hypothetical protein                        | PF00155.14 | Aminotran_1_2(Aminotransferase class I and II)                    |
| Supercontig_1.20_MV<br>LG_02540_7sp   | -363,87861 | -362,87149 | 2,01424 | 0,63473 | NS | 0 |  |  |  |  |  | hypothetical protein                        | NA         | NA                                                                |
| Supercontig_1.76_MV<br>LG_05534_8sp   | -539,75973 | -539,75969 | 0,00016 | 0,00016 | NS | 0 |  |  |  |  |  | hypothetical protein                        | NA         | NA                                                                |
| Supercontig_1.17_MV<br>LG_02261_9sp   | -357,56464 | -357,39004 | 0,3492  | 0,16021 | NS | 0 |  |  |  |  |  | hypothetical protein                        | PF09759.2  | Atx10homo_assoc(Spinocerebellar ataxia type 10 protein domain)    |
| Supercontig_1.25_MV<br>LG_02967_6sp   | -810,56744 | -810,56744 | 0       | 0       | NS | 0 |  |  |  |  |  | hypothetical protein                        | PF08624.3  | CRC_subunit(Chromatin remodelling complex subunit)                |
| Supercontig_1.161_MV<br>LG_06868_10sp | -518,82485 | -517,23891 | 3,17188 | 0,79524 | NS | 0 |  |  |  |  |  | hypothetical protein                        | PF05686.5  | DUF821(Arabidopsis thaliana protein of unknown function (DUF821)) |
| Supercontig_1.4_MVL<br>G_00856_8sp    | -586,29496 | -586,27178 | 0,04636 | 0,02291 | NS | 0 |  |  |  |  |  | hypothetical protein                        | TIGR00222  | TIGR00222(panB: 3-methyl-2-oxobutanate hydroxymethyltransferase)  |
| Supercontig_1.33_MV<br>LG_03474_9sp   | -424,45826 | -424,45826 | 0       | 0       | NS | 0 |  |  |  |  |  | hypothetical protein                        | PF07690.9  | MFS_1(Major Facilitator Superfamily)                              |
| Supercontig_1.68_MV<br>LG_05254_8sp   | -473,02754 | -473,02704 | 0,001   | 0,0005  | NS | 0 |  |  |  |  |  | acetolactate synthase                       | PF00205.15 | TPP_enzyme_M(Thiamine pyrophosphate enzyme, central domain)       |

|                                       |            |            |         |         |    |   |   |   |   |   |   |   |   |   |                                   |            |                                                                                 |
|---------------------------------------|------------|------------|---------|---------|----|---|---|---|---|---|---|---|---|---|-----------------------------------|------------|---------------------------------------------------------------------------------|
| Supercontig_1.53_MV<br>LG_04605_6sp   | -438,00069 | -438,00069 | 0       | 0       | NS | 0 | 0 | 0 | 0 | 0 | 0 | 0 | 0 | 0 | hypothetical protein              | NA         | NA                                                                              |
| Supercontig_1.59_MV<br>LG_04909_11sp  | -1189,0113 | -1189,0113 | 0       | 0       | NS | 0 | 0 | 0 | 0 | 0 | 0 | 0 | 0 | 0 | pre-mRNA-splicing<br>factor PRP46 | PF00400.25 | WD40(WD domain, G-beta<br>repeat)                                               |
| Supercontig_1.122_MV<br>LG_06451_9sp  | -318,58854 | -318,58847 | 0,00014 | 0,00016 | NS | 0 | 0 | 0 | 0 | 0 | 0 | 0 | 0 | 0 | hypothetical protein              | NA         | NA                                                                              |
| Supercontig_1.30_MV<br>LG_03272_9sp   | -1682,9342 | -1682,9342 | 0       | 0       | NS | 0 | 0 | 0 | 0 | 0 | 0 | 0 | 0 | 0 | hypothetical protein              | PF08632.3  | Zds_C(Activator of mitotic<br>machinery Cdc14 phosphatase<br>activation C-term) |
| Supercontig_1.126_MV<br>LG_06520_9sp  | -522,7951  | -522,77121 | 0,04778 | 0,02361 | NS | 0 | 0 | 0 | 0 | 0 | 0 | 0 | 0 | 0 | hypothetical protein              | PF11709.1  | Mit_ribos_Mrp51(Mitochondrial<br>ribosomal protein subunit)                     |
| Supercontig_1.62_MV<br>LG_05023_8sp   | -843,42817 | -843,42808 | 0,00018 | 0,00016 | NS | 0 | 0 | 0 | 0 | 0 | 0 | 0 | 0 | 0 | hypothetical protein              | PF10334.2  | DUF2421(Protein of unknown<br>function (DUF2421))                               |
| Supercontig_1.181_MV<br>LG_07005_9sp  | -316,91324 | -316,91324 | 0       | 0       | NS | 0 | 0 | 0 | 0 | 0 | 0 | 0 | 0 | 0 | hypothetical protein              | NA         | NA                                                                              |
| Supercontig_1.17_MV<br>LG_02306_9sp   | -896,55215 | -895,56366 | 1,97698 | 0,62786 | NS | 0 | 0 | 0 | 0 | 0 | 0 | 0 | 0 | 0 | hypothetical protein              | NA         | NA                                                                              |
| Supercontig_1.78_MV<br>LG_05573_9sp   | -646,66179 | -644,51976 | 4,28406 | 0,88258 | NS | 0 | 0 | 0 | 0 | 0 | 0 | 0 | 0 | 0 | hypothetical protein              | TIGR00685  | TIGR00685(T6PP: trehalose-<br>phosphatase)                                      |
| Supercontig_1.3_MVL<br>G_00550_7sp    | -419,52751 | -419,52745 | 0,00016 | 0,00016 | NS | 0 | 0 | 0 | 0 | 0 | 0 | 0 | 0 | 0 | hypothetical protein              | PF04935.5  | SURF6(Surfeit locus protein 6)                                                  |
| Supercontig_1.12_MV<br>LG_01843_8sp   | -577,31827 | -577,31826 | 0,00016 | 0,00016 | NS | 0 | 0 | 0 | 0 | 0 | 0 | 0 | 0 | 0 | hypothetical protein              | PF00628.22 | PHD(PHD-finger)                                                                 |
| Supercontig_1.1_MVL<br>G_00201_7sp    | -578,65361 | -578,65361 | 0       | 0       | NS | 0 | 0 | 0 | 0 | 0 | 0 | 0 | 0 | 0 | hypothetical protein              | NA         | NA                                                                              |
| Supercontig_1.57_MV<br>LG_04823_10sp  | -675,68339 | -675,68339 | 0       | 0       | NS | 0 | 0 | 0 | 0 | 0 | 0 | 0 | 0 | 0 | hypothetical protein              | PF00889.12 | EF_TS(Elongation factor TS)                                                     |
| Supercontig_1.36_MV<br>LG_03654_9sp   | -416,53396 | -416,53395 | 0,00016 | 0,00016 | NS | 0 | 0 | 0 | 0 | 0 | 0 | 0 | 0 | 0 | hypothetical protein              | PF12054.1  | DUF3535(Domain of unknown<br>function (DUF3535))                                |
| Supercontig_1.11_MV<br>LG_01697_9sp   | -487,78589 | -487,7858  | 0,00018 | 0,00016 | NS | 0 | 0 | 0 | 0 | 0 | 0 | 0 | 0 | 0 | hypothetical protein              | PF01753.11 | zf-MYND(MYND finger)                                                            |
| Supercontig_1.58_MV<br>LG_04866_10sp  | -783,39453 | -781,37416 | 4,04074 | 0,86739 | NS | 0 | 0 | 0 | 0 | 0 | 0 | 0 | 0 | 0 | hypothetical protein              | PF00501.21 | AMP-binding(AMP-binding<br>enzyme)                                              |
| Supercontig_1.13_MV<br>LG_01960_12sp  | -428,52282 | -428,5224  | 0,00084 | 0,00042 | NS | 0 | 0 | 0 | 0 | 0 | 0 | 0 | 0 | 0 | hypothetical protein              | PF02463.12 | SMC_N(RecF/RecN/SMC N<br>terminal domain)                                       |
| Supercontig_1.38_MV<br>LG_03765_9sp   | -613,77544 | -613,77537 | 0,00014 | 0,00016 | NS | 0 | 0 | 0 | 0 | 0 | 0 | 0 | 0 | 0 | hypothetical protein              | PF08772.4  | NOB1_Zn_bind(Nin one binding<br>(NOB1) Zn-ribbon like)                          |
| Supercontig_1.111_MV<br>LG_06310_6sp  | -1021,4093 | -1021,3503 | 0,11802 | 0,0573  | NS | 0 | 0 | 0 | 0 | 0 | 0 | 0 | 0 | 0 | hypothetical protein              | NA         | NA                                                                              |
| Supercontig_1.28_MV<br>LG_03131_8sp   | -451,19273 | -451,19264 | 0,00018 | 0,00016 | NS | 0 | 0 | 0 | 0 | 0 | 0 | 0 | 0 | 0 | hypothetical protein              | PF01115.10 | F_actin_cap_B(F-actin capping<br>protein, beta subunit)                         |
| Supercontig_1.85_MV<br>LG_05799_10sp  | -333,53466 | -333,03658 | 0,99616 | 0,3923  | NS | 0 | 0 | 0 | 0 | 0 | 0 | 0 | 0 | 0 | hypothetical protein              | PF03798.9  | TRAM_LAG1_CLN8(TLC<br>domain)                                                   |
| Supercontig_1.6_MVL<br>G_01198_11sp   | -1128,8827 | -1128,8827 | 0       | 0       | NS | 0 | 0 | 0 | 0 | 0 | 0 | 0 | 0 | 0 | hypothetical protein              | NA         | NA                                                                              |
| Supercontig_1.132_MV<br>LG_06591_12sp | -737,11103 | -737,11103 | 0       | 0       | NS | 0 | 0 | 0 | 0 | 0 | 0 | 0 | 0 | 0 | hypothetical protein              | PF01585.16 | G-patch(G-patch domain)                                                         |
| Supercontig_1.26_MV<br>LG_03049_9sp   | -717,96652 | -717,96651 | 0,00016 | 0,00016 | NS | 0 | 0 | 0 | 0 | 0 | 0 | 0 | 0 | 0 | hypothetical protein              | NA         | NA                                                                              |
| Supercontig_1.70_MV<br>LG_05329_6sp   | -495,21755 | -495,21749 | 0,00016 | 0,00016 | NS | 0 | 0 | 0 | 0 | 0 | 0 | 0 | 0 | 0 | hypothetical protein              | NA         | NA                                                                              |

|                                       |            |            |         |         |    |   |   |   |   |                                          |            |                                                                  |
|---------------------------------------|------------|------------|---------|---------|----|---|---|---|---|------------------------------------------|------------|------------------------------------------------------------------|
| Supercontig_1.100_MV<br>LG_06132_9sp  | -942,68666 | -942,61914 | 0,13504 | 0,06529 | NS | 0 | 0 | 0 | 0 | hypothetical protein                     | PF02373.15 | JmjC(JmjC domain)                                                |
| Supercontig_1.247_MV<br>LG_07211_7sp  | -352,9288  | -352,79456 | 0,26848 | 0,12562 | NS | 0 | 0 | 0 | 0 | hypothetical protein                     | NA         | NA                                                               |
| Supercontig_1.28_MV<br>LG_03149_10sp  | -663,68459 | -663,68459 | 0       | 0       | NS | 0 | 0 | 0 | 0 | hypothetical protein                     | PF07885.9  | Ion_trans_2(Ion channel)                                         |
| Supercontig_1.13_MV<br>LG_01938_7sp   | -1361,0783 | -1358,827  | 4,50256 | 0,89474 | NS | 0 | 0 | 0 | 0 | hypothetical protein                     | PF09779.2  | DUF2349(Uncharacterized conserved protein (DUF2349))             |
| Supercontig_1.4_MVL<br>G_00750_9sp    | -881,65432 | -880,48758 | 2,33348 | 0,68862 | NS | 0 | 0 | 0 | 0 | hypothetical protein                     | NA         | NA                                                               |
| Supercontig_1.94_MV<br>LG_05992_10sp  | -809,07831 | -808,54583 | 1,06496 | 0,41285 | NS | 0 | 0 | 0 | 0 | hypothetical protein                     | PF00172.11 | Zn_clus(Fungal Zn(2)-Cys(6) binuclear cluster domain)            |
| Supercontig_1.126_MV<br>LG_06518_11sp | -331,30616 | -331,30571 | 0,0009  | 0,00045 | NS | 0 | 0 | 0 | 0 | septin like spn2                         | PF04548.9  | AIG1(AIG1 family)                                                |
| Supercontig_1.2_MVL<br>G_00423_10sp   | -439,24998 | -438,83876 | 0,82244 | 0,33716 | NS | 0 | 0 | 0 | 0 | hypothetical protein                     | PF12572.1  | DUF3752(Protein of unknown function (DUF3752))                   |
| Supercontig_1.32_MV<br>LG_03410_6sp   | -824,13036 | -824,13036 | 0       | 0       | NS | 0 | 0 | 0 | 0 | hypothetical protein                     | PF07690.9  | MFS_1(Major Facilitator Superfamily)                             |
| Supercontig_1.52_MV<br>LG_04563_7sp   | -659,63714 | -659,63714 | 0       | 0       | NS | 0 | 0 | 0 | 0 | hypothetical protein                     | PF07722.6  | Peptidase_C26(Peptidase C26)                                     |
| Supercontig_1.58_MV<br>LG_04849_10sp  | -1227,0887 | -1227,0601 | 0,0572  | 0,02819 | NS | 0 | 0 | 0 | 0 | hypothetical protein                     | NA         | NA                                                               |
| Supercontig_1.3_MVL<br>G_00541_10sp   | -992,88159 | -992,88159 | 0       | 0       | NS | 0 | 0 | 0 | 0 | hypothetical protein                     | PF00270.22 | DEAD(DEAD/DEAH box helicase)                                     |
| Supercontig_1.12_MV<br>LG_01855_6sp   | -1034,9439 | -1034,9439 | 0,0001  | 0,00016 | NS | 0 | 0 | 0 | 0 | hypothetical protein                     | TIGR00555  | TIGR00555(panK_eukar: pantothenate kinase)                       |
| Supercontig_1.45_MV<br>LG_04214_9sp   | -895,66401 | -895,17272 | 0,98258 | 0,38816 | NS | 0 | 0 | 0 | 0 | hypothetical protein                     | PF01735.11 | PLA2_B(Lysophospholipase catalytic domain)                       |
| Supercontig_1.69_MV<br>LG_05275_6sp   | -953,72976 | -953,72778 | 0,00396 | 0,00198 | NS | 0 | 0 | 0 | 0 | hypothetical protein                     | NA         | NA                                                               |
| Supercontig_1.76_MV<br>LG_05516_10sp  | -413,90189 | -413,90188 | 0,00016 | 0,00016 | NS | 0 | 0 | 0 | 0 | hypothetical protein                     | NA         | NA                                                               |
| Supercontig_1.6_MVL<br>G_01098_10sp   | -338,83445 | -338,83426 | 0,00038 | 0,00019 | NS | 0 | 0 | 0 | 0 | isocitrate dehydrogenase [NAD] subunit 2 | TIGR00175  | TIGR00175(mito_nad_idh: isocitrate dehydrogenase, NAD-dependent) |
| Supercontig_1.67_MV<br>LG_05225_8sp   | -1035,0962 | -1035,0962 | 0       | 0       | NS | 0 | 0 | 0 | 0 | hypothetical protein                     | PF00364.15 | Biotin_lipoyl(Biotin-requiring enzyme)                           |
| Supercontig_1.5_MVL<br>G_00969_9sp    | -1008,6251 | -1008,6251 | 0       | 0       | NS | 0 | 0 | 0 | 0 | hypothetical protein                     | NA         | NA                                                               |
| Supercontig_1.8_MVL<br>G_01430_9sp    | -909,49209 | -909,47959 | 0,025   | 0,01242 | NS | 0 | 0 | 0 | 0 | hypothetical protein                     | PF06248.6  | Zw10(Centromere/kinetochore Zw10)                                |
| Supercontig_1.140_MV<br>LG_06678_6sp  | -400,68461 | -400,68442 | 0,00038 | 0,00019 | NS | 0 | 0 | 0 | 0 | synaptobrevin like 1                     | PF00957.14 | Synaptobrevin(Synaptobrevin)                                     |
| Supercontig_1.69_MV<br>LG_05288_6sp   | -821,6998  | -821,6998  | 0       | 0       | NS | 0 | 0 | 0 | 0 | glucose-6-phosphate isomerase            | PF00342.12 | PGI(Phosphoglucose isomerase)                                    |
| Supercontig_1.3_MVL<br>G_00611_11sp   | -627,4673  | -627,4673  | 0       | 0       | NS | 0 | 0 | 0 | 0 | hypothetical protein                     | PF00447.10 | HSF_DNA-bind(HSF-type DNA-binding)                               |

|                                      |            |            |         |         |    |   |   |   |   |   |                                                                                      |            |                                                                               |
|--------------------------------------|------------|------------|---------|---------|----|---|---|---|---|---|--------------------------------------------------------------------------------------|------------|-------------------------------------------------------------------------------|
| Supercontig_1.240_MV<br>LG_07203_7sp | -471,83727 | -471,83727 | 0       | 0       | NS | 0 | □ | □ | □ | □ | 5-<br>methyltetrahydroptero-<br>yltriglutamate-<br>homocysteine<br>methyltransferase | PF01717.11 | Meth_synt_2(Cobalamin-<br>independent synthase, Catalytic<br>domain)          |
| Supercontig_1.49_MV<br>LG_04422_8sp  | -743,829   | -743,20928 | 1,23944 | 0,4619  | NS | 0 | □ | □ | □ | □ | hypothetical protein                                                                 | PF07690.9  | MFS_1(Major Facilitator<br>Superfamily)                                       |
| Supercontig_1.30_MV<br>LG_03290_10sp | -560,80077 | -560,80044 | 0,00066 | 0,00033 | NS | 0 | □ | □ | □ | □ | hypothetical protein                                                                 | PF02540.10 | NAD_synthase(NAD synthase)                                                    |
| Supercontig_1.26_MV<br>LG_03028_10sp | -441,74596 | -441,74596 | 0       | 0       | NS | 0 | □ | □ | □ | □ | hypothetical protein                                                                 | PF02301.11 | HORMA(HORMA domain)                                                           |
| Supercontig_1.9_MVL<br>G_01543_11sp  | -707,02845 | -707,02845 | 0       | 0       | NS | 0 | □ | □ | □ | □ | hypothetical protein                                                                 | PF04801.6  | Sin_N(Sin-like protein conserved<br>region)                                   |
| Supercontig_1.67_MV<br>LG_05207_9sp  | -1144,2833 | -1144,2833 | 0       | 0       | NS | 0 | □ | □ | □ | □ | hypothetical protein                                                                 | PF01048.13 | PNP_UDP_1(Phosphorylase<br>superfamily)                                       |
| Supercontig_1.9_MVL<br>G_01571_12sp  | -377,51031 | -377,50985 | 0,00092 | 0,00046 | NS | 0 | □ | □ | □ | □ | hypothetical protein                                                                 | NA         | NA                                                                            |
| Supercontig_1.32_MV<br>LG_03425_10sp | -655,24398 | -655,24398 | 0       | 0       | NS | 0 | □ | □ | □ | □ | hypothetical protein                                                                 | NA         | NA                                                                            |
| Supercontig_1.12_MV<br>LG_01819_11sp | -686,43183 | -686,43183 | 0       | 0       | NS | 0 | □ | □ | □ | □ | hypothetical protein                                                                 | NA         | NA                                                                            |
| Supercontig_1.11_MV<br>LG_01724_12sp | -634,64986 | -634,64986 | 0       | 0       | NS | 0 | □ | □ | □ | □ | hypothetical protein                                                                 | TIGR01241  | TIGR01241(FtsH_fam: ATP-<br>dependent metallopeptidase<br>HflB)               |
| Supercontig_1.85_MV<br>LG_05805_8sp  | -329,76624 | -329,76619 | 0,00016 | 0,00016 | NS | 0 | □ | □ | □ | □ | hypothetical protein                                                                 | PF04622.5  | ERG2_Sigma1R(ERG2 and<br>Sigma1 receptor like protein)                        |
| Supercontig_1.1_MVL<br>G_00228_9sp   | -483,69409 | -481,69903 | 3,99012 | 0,86399 | NS | 0 | □ | □ | □ | □ | hypothetical protein                                                                 | NA         | NA                                                                            |
| Supercontig_1.13_MV<br>LG_01894_9sp  | -687,91985 | -687,91985 | 0       | 0       | NS | 0 | □ | □ | □ | □ | hypothetical protein                                                                 | PF00888.15 | Cullin(Cullin family)                                                         |
| Supercontig_1.38_MV<br>LG_03805_8sp  | -499,2897  | -499,2897  | 0       | 0       | NS | 0 | □ | □ | □ | □ | serine/threonine-<br>protein phosphatase<br>PP-X isozyme 1                           | PF00149.21 | Metallophos(Calcineurin-like<br>phosphoesterase)                              |
| Supercontig_1.22_MV<br>LG_02709_10sp | -452,83885 | -451,52408 | 2,62954 | 0,73146 | NS | 0 | □ | □ | □ | □ | hypothetical protein                                                                 | PF00076.15 | RRM_1(RNA recognition motif.<br>(a.k.a. RRM, RBD, or RNP<br>domain))          |
| Supercontig_1.55_MV<br>LG_04743_8sp  | -396,7162  | -396,4018  | 0,6288  | 0,26977 | NS | 0 | □ | □ | □ | □ | hypothetical protein                                                                 | PF02146.10 | SIR2(Sir2 family)                                                             |
| Supercontig_1.59_MV<br>LG_04890_8sp  | -435,1159  | -435,11584 | 0,00012 | 0,00016 | NS | 0 | □ | □ | □ | □ | hypothetical protein                                                                 | NA         | NA                                                                            |
| Supercontig_1.4_MVL<br>G_00812_10sp  | -799,46101 | -799,46101 | 0       | 0       | NS | 0 | □ | □ | □ | □ | hypothetical protein                                                                 | PF00160.14 | Pro_isomerase(Cyclophilin type<br>peptidyl-prolyl cis-trans<br>isomerase/CLD) |
| Supercontig_1.15_MV<br>LG_02085_10sp | -487,4528  | -486,85047 | 1,20466 | 0,45247 | NS | 0 | □ | □ | □ | □ | hypothetical protein                                                                 | PF03770.9  | IPK(Inositol polyphosphate<br>kinase)                                         |
| Supercontig_1.61_MV<br>LG_04971_10sp | -461,55111 | -461,55108 | 0,00016 | 0,00016 | NS | 0 | □ | □ | □ | □ | hypothetical protein                                                                 | NA         | NA                                                                            |
| Supercontig_1.14_MV<br>LG_02019_9sp  | -595,5095  | -595,50944 | 0,00016 | 0,00016 | NS | 0 | □ | □ | □ | □ | hypothetical protein                                                                 | PF00324.14 | AA_permease(Amino acid<br>permease)                                           |
| Supercontig_1.36_MV<br>LG_03645_6sp  | -315,49059 | -315,49059 | 0       | 0       | NS | 0 | □ | □ | □ | □ | UcrQ family protein                                                                  | PF02939.9  | UcrQ(UcrQ family)                                                             |

|                                       |            |            |         |         |    |   |   |   |   |   |                                         |            |                                                                            |
|---------------------------------------|------------|------------|---------|---------|----|---|---|---|---|---|-----------------------------------------|------------|----------------------------------------------------------------------------|
| Supercontig_1.92_MV<br>LG_05968_9sp   | -368,58061 | -368,79674 | 0       | 0       | NS | 0 | □ | □ | □ | □ | 3-ketoacyl-CoA<br>thiolase, peroxisomal | TIGR01930  | TIGR01930(AcCoA-C-Actrans:<br>acetyl-CoA C-acetyltransferase)              |
| Supercontig_1.58_MV<br>LG_04872_7sp   | -840,38268 | -840,38257 | 0,00022 | 0,00011 | NS | 0 | □ | □ | □ | □ | hypothetical protein                    | TIGR00879  | TIGR00879(SP: MFS<br>transporter, sugar porter (SP)<br>family)             |
| Supercontig_1.84_MV<br>LG_05777_8sp   | -606,10926 | -606,1088  | 0,00092 | 0,00046 | NS | 0 | □ | □ | □ | □ | GTP-binding protein<br>ypt1             | PF04670.5  | Gtr1_RagA(Gtr1/RagA G protein<br>conserved region)                         |
| Supercontig_1.63_MV<br>LG_05056_12sp  | -378,43986 | -378,09191 | 0,6959  | 0,29387 | NS | 0 | □ | □ | □ | □ | hypothetical protein                    | NA         | NA                                                                         |
| Supercontig_1.36_MV<br>LG_03689_6sp   | -690,04652 | -690,04652 | 0       | 0       | NS | 0 | □ | □ | □ | □ | hypothetical protein                    | NA         | NA                                                                         |
| Supercontig_1.113_MV<br>LG_06342_12sp | -503,47079 | -503,47079 | 0       | 0       | NS | 0 | □ | □ | □ | □ | hypothetical protein                    | PF08596.3  | Lgl_C(Lethal giant larvae(Lgl)<br>like, C-terminal)                        |
| Supercontig_1.69_MV<br>LG_05294_7sp   | -572,96722 | -572,96722 | 0       | 0       | NS | 0 | □ | □ | □ | □ | hypothetical protein                    | NA         | NA                                                                         |
| Supercontig_1.63_MV<br>LG_05060_8sp   | -557,0644  | -557,0644  | 0       | 0       | NS | 0 | □ | □ | □ | □ | hypothetical protein                    | PF00450.15 | Peptidase_S10(Serine<br>carboxypeptidase)                                  |
| Supercontig_1.46_MV<br>LG_04288_10sp  | -596,09641 | -596,09641 | 0       | 0       | NS | 0 | □ | □ | □ | □ | hypothetical protein                    | PF11712.1  | Vma12(Endoplasmic reticulum-<br>based factor for assembly of V-<br>ATPase) |
| Supercontig_1.49_MV<br>LG_04410_8sp   | -1130,3436 | -1130,3436 | 0       | 0       | NS | 0 | □ | □ | □ | □ | hypothetical protein                    | PF10236.2  | DAP3(Mitochondrial ribosomal<br>death-associated protein 3)                |
| Supercontig_1.56_MV<br>LG_04774_12sp  | -942,47109 | -942,35799 | 0,2262  | 0,10694 | NS | 0 | □ | □ | □ | □ | hypothetical protein                    | PF03205.7  | MobB(Molybdopterin guanine<br>dinucleotide synthesis protein B)            |
| Supercontig_1.6_MVL<br>G_01072_7sp    | -441,22846 | -440,54912 | 1,35868 | 0,49305 | NS | 0 | □ | □ | □ | □ | hypothetical protein                    | PF07685.7  | GATase_3(CobB/CobQ-like<br>glutamine amidotransferase<br>domain)           |
| Supercontig_1.211_MV<br>LG_07124_9sp  | -509,63181 | -509,46147 | 0,34068 | 0,15662 | NS | 0 | □ | □ | □ | □ | hypothetical protein                    | NA         | NA                                                                         |
| Supercontig_1.26_MV<br>LG_03011_12sp  | -1187,2084 | -1187,2084 | 0       | 0       | NS | 0 | □ | □ | □ | □ | hypothetical protein                    | PF12253.1  | CAF1A(Chromatin assembly<br>factor 1 subunit A)                            |
| Supercontig_1.54_MV<br>LG_04651_9sp   | -1079,1449 | -1079,1449 | 0       | 0       | NS | 0 | □ | □ | □ | □ | hypothetical protein                    | TIGR00010  | TIGR00010(TIGR00010:<br>hydrolase, TatD family)                            |
| Supercontig_1.27_MV<br>LG_03076_8sp   | -749,39319 | -747,96399 | 2,8584  | 0,7605  | NS | 0 | □ | □ | □ | □ | hypothetical protein                    | TIGR00604  | TIGR00604(rad3: DNA repair<br>helicase (rad3))                             |
| Supercontig_1.28_MV<br>LG_03140_10sp  | -698,0286  | -698,01221 | 0,03278 | 0,01626 | NS | 0 | □ | □ | □ | □ | hypothetical protein                    | PF04421.6  | Mss4(Mss4 protein)                                                         |
| Supercontig_1.14_MV<br>LG_02000_10sp  | -387,41735 | -387,07375 | 0,6872  | 0,29079 | NS | 0 | □ | □ | □ | □ | hypothetical protein                    | NA         | NA                                                                         |
| Supercontig_1.53_MV<br>LG_04620_6sp   | -680,7667  | -680,58197 | 0,36946 | 0,16867 | NS | 0 | □ | □ | □ | □ | hypothetical protein                    | NA         | NA                                                                         |
| Supercontig_1.170_MV<br>LG_06941_9sp  | -420,37607 | -420,37607 | 0       | 0       | NS | 0 | □ | □ | □ | □ | hypothetical protein                    | TIGR00879  | TIGR00879(SP: MFS<br>transporter, sugar porter (SP)<br>family)             |
| Supercontig_1.97_MV<br>LG_06060_11sp  | -455,53575 | -455,53575 | 0       | 0       | NS | 0 | □ | □ | □ | □ | hypothetical protein                    | PF05691.5  | Raffinose_syn(Raffinose<br>synthase or seed inhibition<br>protein Sip1)    |
| Supercontig_1.69_MV<br>LG_05312_8sp   | -499,51928 | -499,51928 | 0       | 0       | NS | 0 | □ | □ | □ | □ | hypothetical protein                    | PF07542.4  | ATP12(ATP12 chaperone<br>protein)                                          |

|                                      |            |            |         |         |    |   |   |   |   |   |   |   |   |   |                                                  |            |                                                                |
|--------------------------------------|------------|------------|---------|---------|----|---|---|---|---|---|---|---|---|---|--------------------------------------------------|------------|----------------------------------------------------------------|
| Supercontig_1.93_MV<br>LG_05977_10sp | -508,818   | -508,81801 | 0       | 0       | NS | 0 | 0 | 0 | 0 | 0 | 0 | 0 | 0 | 0 | AGC/PDK1 protein kinase                          | PF07714.10 | Pkinase_Tyr(Protein tyrosine kinase)                           |
| Supercontig_1.154_MV<br>LG_06810_7sp | -908,40498 | -907,18049 | 2,44898 | 0,70609 | NS | 0 | 0 | 0 | 0 | 0 | 0 | 0 | 0 | 0 | hypothetical protein                             | NA         | NA                                                             |
| Supercontig_1.2_MVL<br>G_00342_12sp  | -378,8601  | -378,85957 | 0,00106 | 0,00053 | NS | 0 | 0 | 0 | 0 | 0 | 0 | 0 | 0 | 0 | hypothetical protein                             | NA         | NA                                                             |
| Supercontig_1.1_MVL<br>G_00023_9sp   | -1292,7791 | -1292,7791 | 0       | 0       | NS | 0 | 0 | 0 | 0 | 0 | 0 | 0 | 0 | 0 | AGC/PKA protein kinase                           | PF07714.10 | Pkinase_Tyr(Protein tyrosine kinase)                           |
| Supercontig_1.165_MV<br>LG_06909_9sp | -563,64803 | -563,64803 | 0       | 0       | NS | 0 | 0 | 0 | 0 | 0 | 0 | 0 | 0 | 0 | hypothetical protein                             | NA         | NA                                                             |
| Supercontig_1.5_MVL<br>G_01033_11sp  | -534,58278 | -534,58275 | 0,00016 | 0,00016 | NS | 0 | 0 | 0 | 0 | 0 | 0 | 0 | 0 | 0 | hypothetical protein                             | TIGR00855  | TIGR00855(L12: ribosomal protein L7/L12)                       |
| Supercontig_1.52_MV<br>LG_04565_8sp  | -895,79255 | -895,79255 | 0,00016 | 0,00016 | NS | 0 | 0 | 0 | 0 | 0 | 0 | 0 | 0 | 0 | hypothetical protein                             | NA         | NA                                                             |
| Supercontig_1.9_MVL<br>G_01490_7sp   | -424,87223 | -424,87223 | 0       | 0       | NS | 0 | 0 | 0 | 0 | 0 | 0 | 0 | 0 | 0 | hypothetical protein                             | PF10163.2  | EnY2(Transcription factor e(y)2)                               |
| Supercontig_1.22_MV<br>LG_02715_9sp  | -1307,2479 | -1307,2479 | 0       | 0       | NS | 0 | 0 | 0 | 0 | 0 | 0 | 0 | 0 | 0 | hypothetical protein                             | PF00443.22 | UCH(Ubiquitin carboxyl-terminal hydrolase)                     |
| Supercontig_1.26_MV<br>LG_03058_6sp  | -873,35618 | -871,67287 | 3,36662 | 0,81424 | NS | 0 | 0 | 0 | 0 | 0 | 0 | 0 | 0 | 0 | hypothetical protein                             | PF00884.16 | Sulfatase(Sulfatase)                                           |
| Supercontig_1.26_MV<br>LG_03022_12sp | -537,85129 | -537,85129 | 0       | 0       | NS | 0 | 0 | 0 | 0 | 0 | 0 | 0 | 0 | 0 | 2-isopropylmalate synthase                       | PF00682.12 | HMGL-like(HMGL-like)                                           |
| Supercontig_1.39_MV<br>LG_03836_9sp  | -747,85881 | -747,85881 | 0       | 0       | NS | 0 | 0 | 0 | 0 | 0 | 0 | 0 | 0 | 0 | pyruvate dehydrogenase E1 component subunit beta | PF02780.13 | Transketolase_C(Transketolase, C-terminal domain)              |
| Supercontig_1.45_MV<br>LG_04199_10sp | -719,82393 | -719,82393 | 0       | 0       | NS | 0 | 0 | 0 | 0 | 0 | 0 | 0 | 0 | 0 | AGC protein kinase                               | PF07714.10 | Pkinase_Tyr(Protein tyrosine kinase)                           |
| Supercontig_1.4_MVL<br>G_00809_9sp   | -389,48984 | -389,48962 | 0,00044 | 0,00022 | NS | 0 | 0 | 0 | 0 | 0 | 0 | 0 | 0 | 0 | hypothetical protein                             | PF00150.11 | Cellulase(Cellulase (glycosyl hydrolase family 5))             |
| Supercontig_1.87_MV<br>LG_05854_7sp  | -357,21583 | -357,21583 | 0       | 0       | NS | 0 | 0 | 0 | 0 | 0 | 0 | 0 | 0 | 0 | hypothetical protein                             | TIGR01164  | TIGR01164(rlpBact: ribosomal protein L16)                      |
| Supercontig_1.4_MVL<br>G_00830_11sp  | -644,50847 | -644,50847 | 0       | 0       | NS | 0 | 0 | 0 | 0 | 0 | 0 | 0 | 0 | 0 | hypothetical protein                             | NA         | NA                                                             |
| Supercontig_1.24_MV<br>LG_02855_7sp  | -812,69791 | -812,25795 | 0,87992 | 0,35594 | NS | 0 | 0 | 0 | 0 | 0 | 0 | 0 | 0 | 0 | hypothetical protein                             | PF10996.1  | Beta-Casp(Beta-Casp domain)                                    |
| Supercontig_1.231_MV<br>LG_07192_8sp | -419,64919 | -419,64905 | 0,00028 | 0,00014 | NS | 0 | 0 | 0 | 0 | 0 | 0 | 0 | 0 | 0 | hypothetical protein                             | PF00412.15 | LIM(LIM domain)                                                |
| Supercontig_1.19_MV<br>LG_02503_7sp  | -580,4135  | -580,13644 | 0,55412 | 0,24199 | NS | 0 | 0 | 0 | 0 | 0 | 0 | 0 | 0 | 0 | hypothetical protein                             | PF06703.4  | SPC25(Microsomal signal peptidase 25 kDa subunit (SPC25))      |
| Supercontig_1.7_MVL<br>G_01244_8sp   | -780,97881 | -780,65551 | 0,6466  | 0,27624 | NS | 0 | 0 | 0 | 0 | 0 | 0 | 0 | 0 | 0 | AGC/PKC protein kinase                           | PF07714.10 | Pkinase_Tyr(Protein tyrosine kinase)                           |
| Supercontig_1.27_MV<br>LG_03097_10sp | -970,20093 | -969,89277 | 0,61632 | 0,2652  | NS | 0 | 0 | 0 | 0 | 0 | 0 | 0 | 0 | 0 | hypothetical protein                             | PF01055.19 | Glyco_hydro_31(Glycosyl hydrolases family 31)                  |
| Supercontig_1.34_MV<br>LG_03517_8sp  | -808,4443  | -808,43999 | 0,00862 | 0,0043  | NS | 0 | 0 | 0 | 0 | 0 | 0 | 0 | 0 | 0 | hypothetical protein                             | PF00557.17 | Peptidase_M24(Metallopeptidase family M24)                     |
| Supercontig_1.122_MV<br>LG_06452_7sp | -1358,3404 | -1358,2748 | 0,13112 | 0,06346 | NS | 0 | 0 | 0 | 0 | 0 | 0 | 0 | 0 | 0 | hypothetical protein                             | PF11957.1  | efThoc1(THO complex subunit 1 transcription elongation factor) |
| Supercontig_1.4_MVL<br>G_00729_8sp   | -1004,5129 | -1003,8866 | 1,25262 | 0,46544 | NS | 0 | 0 | 0 | 0 | 0 | 0 | 0 | 0 | 0 | hypothetical protein                             | NA         | NA                                                             |



|                                       |            |            |         |         |    |   |   |   |   |   |   |   |   |   |   |                                   |            |                                                       |
|---------------------------------------|------------|------------|---------|---------|----|---|---|---|---|---|---|---|---|---|---|-----------------------------------|------------|-------------------------------------------------------|
| Supercontig_1.60_MV<br>LG_04954_9sp   | -572,82826 | -572,82826 | 0       | 0       | NS | 0 | 0 | 0 | 0 | 0 | 0 | 0 | 0 | 0 | 0 | hypothetical protein              | NA         | NA                                                    |
| Supercontig_1.22_MV<br>LG_02707_7sp   | -579,14313 | -579,14304 | 0,00018 | 0,00016 | NS | 0 | 0 | 0 | 0 | 0 | 0 | 0 | 0 | 0 | 0 | hypothetical protein              | PF04142.8  | Nuc_sug_transp(Nucleotide-sugar transporter)          |
| Supercontig_1.1_MVL<br>G_00155_9sp    | -314,41962 | -313,95628 | 0,92668 | 0,37082 | NS | 0 | 0 | 0 | 0 | 0 | 0 | 0 | 0 | 0 | 0 | hypothetical protein              | NA         | NA                                                    |
| Supercontig_1.6_MVL<br>G_01123_12sp   | -443,21276 | -443,17821 | 0,0691  | 0,03396 | NS | 0 | 0 | 0 | 0 | 0 | 0 | 0 | 0 | 0 | 0 | hypothetical protein              | PF00400.25 | WD40(WD domain, G-beta repeat)                        |
| Supercontig_1.48_MV<br>LG_04357_12sp  | -779,98479 | -779,73883 | 0,49192 | 0,21805 | NS | 0 | 0 | 0 | 0 | 0 | 0 | 0 | 0 | 0 | 0 | hypothetical protein              | PF01735.11 | PLA2_B(Lysophospholipase catalytic domain)            |
| Supercontig_1.81_MV<br>LG_05676_6sp   | -1184,119  | -1184,119  | 0       | 0       | NS | 0 | 0 | 0 | 0 | 0 | 0 | 0 | 0 | 0 | 0 | hypothetical protein              | PF03097.11 | BRO1(BRO1-like domain)                                |
| Supercontig_1.53_MV<br>LG_04622_8sp   | -634,26135 | -634,26117 | 0,00036 | 0,00018 | NS | 0 | 0 | 0 | 0 | 0 | 0 | 0 | 0 | 0 | 0 | hypothetical protein              | PF10300.2  | IML2(Putative mitochondrial outer membrane protein)   |
| Supercontig_1.18_MV<br>LG_02394_8sp   | -397,52518 | -397,5251  | 0,00016 | 0,00016 | NS | 0 | 0 | 0 | 0 | 0 | 0 | 0 | 0 | 0 | 0 | hypothetical protein              | PF08295.5  | HDAC_interact(Histone deacetylase (HDAC) interacting) |
| Supercontig_1.49_MV<br>LG_04447_7sp   | -552,8605  | -552,8605  | 0       | 0       | NS | 0 | 0 | 0 | 0 | 0 | 0 | 0 | 0 | 0 | 0 | hypothetical protein              | PF00366.13 | Ribosomal_S17(Ribosomal protein S17)                  |
| Supercontig_1.6_MVL<br>G_01220_6sp    | -452,2375  | -452,2375  | 0       | 0       | NS | 0 | 0 | 0 | 0 | 0 | 0 | 0 | 0 | 0 | 0 | V-type proton ATPase subunit F    | PF01990.10 | ATP-synt_F(ATP synthase (F1/4-kDa) subunit)           |
| Supercontig_1.33_MV<br>LG_03448_7sp   | -678,36807 | -677,65783 | 1,42048 | 0,50847 | NS | 0 | 0 | 0 | 0 | 0 | 0 | 0 | 0 | 0 | 0 | hypothetical protein              | NA         | NA                                                    |
| Supercontig_1.2_MVL<br>G_00401_8sp    | -1220,0754 | -1220,0754 | 0       | 0       | NS | 0 | 0 | 0 | 0 | 0 | 0 | 0 | 0 | 0 | 0 | AGC/NDR protein kinase            | PF07714.10 | Pkinase_Tyr(Protein tyrosine kinase)                  |
| Supercontig_1.69_MV<br>LG_05287_7sp   | -874,27856 | -874,26715 | 0,02282 | 0,01135 | NS | 0 | 0 | 0 | 0 | 0 | 0 | 0 | 0 | 0 | 0 | hypothetical protein              | PF10213.2  | MRP-S28(Mitochondrial ribosomal subunit protein)      |
| Supercontig_1.163_MV<br>LG_06883_10sp | -608,98414 | -608,98411 | 0,00016 | 0,00016 | NS | 0 | 0 | 0 | 0 | 0 | 0 | 0 | 0 | 0 | 0 | hypothetical protein              | PF00651.24 | BTB(BTB/POZ domain)                                   |
| Supercontig_1.12_MV<br>LG_01853_7sp   | -750,70065 | -750,70065 | 0       | 0       | NS | 0 | 0 | 0 | 0 | 0 | 0 | 0 | 0 | 0 | 0 | hypothetical protein              | PF04502.6  | DUF572(Family of unknown function (DUF572))           |
| Supercontig_1.2_MVL<br>G_00434_10sp   | -920,54517 | -920,54517 | 0       | 0       | NS | 0 | 0 | 0 | 0 | 0 | 0 | 0 | 0 | 0 | 0 | CAMK/CAMKL protein kinase         | PF07714.10 | Pkinase_Tyr(Protein tyrosine kinase)                  |
| Supercontig_1.55_MV<br>LG_04702_9sp   | -333,33366 | -333,23056 | 0,2062  | 0,09796 | NS | 0 | 0 | 0 | 0 | 0 | 0 | 0 | 0 | 0 | 0 | hypothetical protein              | PF00578.14 | AhpC-TSA(AhpC/TSA family)                             |
| Supercontig_1.2_MVL<br>G_00384_9sp    | -573,9265  | -573,92584 | 0,00132 | 0,00066 | NS | 0 | 0 | 0 | 0 | 0 | 0 | 0 | 0 | 0 | 0 | 40S ribosomal protein S0          | PF00318.13 | Ribosomal_S2(Ribosomal protein S2)                    |
| Supercontig_1.107_MV<br>LG_06248_6sp  | -441,19695 | -441,11827 | 0,15736 | 0,07566 | NS | 0 | 0 | 0 | 0 | 0 | 0 | 0 | 0 | 0 | 0 | hypothetical protein              | PF09184.4  | PPP4R2(PPP4R2)                                        |
| Supercontig_1.12_MV<br>LG_01817_12sp  | -470,9987  | -470,99858 | 0,00024 | 0,00012 | NS | 0 | 0 | 0 | 0 | 0 | 0 | 0 | 0 | 0 | 0 | hypothetical protein              | PF00172.11 | Zn_clus(Fungal Zn(2)-Cys(6) binuclear cluster domain) |
| Supercontig_1.1_MVL<br>G_00003_9sp    | -1080,8941 | -1080,887  | 0,01432 | 0,00713 | NS | 0 | 0 | 0 | 0 | 0 | 0 | 0 | 0 | 0 | 0 | T-complex protein 1 subunit theta | PF00118.17 | Cpn60_TCP1(TCP-1/cpn60 chaperonin family)             |
| Supercontig_1.18_MV<br>LG_02364_9sp   | -755,31309 | -755,31303 | 0,00012 | 0,00016 | NS | 0 | 0 | 0 | 0 | 0 | 0 | 0 | 0 | 0 | 0 | hypothetical protein              | PF07859.6  | Abhydrolase_3(alpha/beta hydrolase fold)              |
| Supercontig_1.8_MVL<br>G_01379_9sp    | -646,29723 | -645,98087 | 0,63272 | 0,2712  | NS | 0 | 0 | 0 | 0 | 0 | 0 | 0 | 0 | 0 | 0 | hypothetical protein              | PF08954.4  | DUF1900(Domain of unknown function (DUF1900))         |
| Supercontig_1.22_MV<br>LG_02705_12sp  | -607,03831 | -607,0351  | 0,00642 | 0,0032  | NS | 0 | 0 | 0 | 0 | 0 | 0 | 0 | 0 | 0 | 0 | hypothetical protein              | NA         | NA                                                    |
| Supercontig_1.78_MV<br>LG_05579_9sp   | -594,84941 | -592,60826 | 4,4823  | 0,89366 | NS | 0 | 0 | 0 | 0 | 0 | 0 | 0 | 0 | 0 | 0 | hypothetical protein              | NA         | NA                                                    |



|                                      |            |            |         |         |    |   |   |   |   |   |   |                                                            |            |                                                                      |
|--------------------------------------|------------|------------|---------|---------|----|---|---|---|---|---|---|------------------------------------------------------------|------------|----------------------------------------------------------------------|
| Supercontig_1.82_MV<br>LG_05708_9sp  | -779,98743 | -779,98743 | 0       | 0       | NS | 0 | □ | □ | □ | □ | □ | hypothetical protein                                       | PF01535.13 | PPR(PPR repeat)                                                      |
| Supercontig_1.150_MV<br>LG_06771_7sp | -459,10219 | -458,82809 | 0,5482  | 0,23974 | NS | 0 | □ | □ | □ | □ | □ | GTP-binding protein<br>rhb1                                | PF08477.6  | Miro(Miro-like protein)                                              |
| Supercontig_1.68_MV<br>LG_05259_10sp | -984,34554 | -984,34534 | 0,0004  | 0,0002  | NS | 0 | □ | □ | □ | □ | □ | Ca2+:H+ antiporter                                         | TIGR00378  | TIGR00378(cax: calcium/proton<br>exchanger)                          |
| Supercontig_1.34_MV<br>LG_03510_11sp | -438,50181 | -438,50181 | 0       | 0       | NS | 0 | □ | □ | □ | □ | □ | hypothetical protein                                       | PF01138.14 | RNase_PH(3' exoribonuclease<br>family, domain 1)                     |
| Supercontig_1.67_MV<br>LG_05216_8sp  | -791,69882 | -791,69882 | 0       | 0       | NS | 0 | □ | □ | □ | □ | □ | hypothetical protein                                       | PF00723.14 | Glyco_hydro_15(Glycosyl<br>hydrolases family 15)                     |
| Supercontig_1.10_MV<br>LG_01603_10sp | -414,32033 | -414,32033 | 0       | 0       | NS | 0 | □ | □ | □ | □ | □ | hypothetical protein                                       | PF03016.8  | Exostosin(Exostosin family)                                          |
| Supercontig_1.21_MV<br>LG_02623_10sp | -956,13953 | -954,43582 | 3,40742 | 0,81799 | NS | 0 | □ | □ | □ | □ | □ | hypothetical protein                                       | NA         | NA                                                                   |
| Supercontig_1.13_MV<br>LG_01923_10sp | -663,02492 | -663,02492 | 0       | 0       | NS | 0 | □ | □ | □ | □ | □ | short/branched chain<br>specific acyl-CoA<br>dehydrogenase | PF02770.12 | Acyl-CoA_dh_M(Acyl-CoA<br>dehydrogenase, middle domain)              |
| Supercontig_1.46_MV<br>LG_04273_9sp  | -348,82195 | -348,82195 | 0       | 0       | NS | 0 | □ | □ | □ | □ | □ | hypothetical protein                                       | NA         | NA                                                                   |
| Supercontig_1.40_MV<br>LG_03938_10sp | -544,68249 | -544,68218 | 0,00062 | 0,00031 | NS | 0 | □ | □ | □ | □ | □ | hypothetical protein                                       | NA         | NA                                                                   |
| Supercontig_1.1_MVL<br>G_00038_12sp  | -406,39497 | -403,70286 | 5,38422 | 0,93226 | *  | 0 | □ | □ | □ | □ | □ | hypothetical protein                                       | PF04670.5  | Gtr1_RagA(Gtr1/RagA G protein<br>conserved region)                   |
| Supercontig_1.51_MV<br>LG_04513_8sp  | -517,98655 | -517,98646 | 0,00018 | 0,00016 | NS | 0 | □ | □ | □ | □ | □ | STE/STE20/YSK<br>protein kinase                            | PF07714.10 | Pkinase_Tyr(Protein tyrosine<br>kinase)                              |
| Supercontig_1.16_MV<br>LG_02199_12sp | -395,2588  | -395,25863 | 0,00034 | 0,00017 | NS | 0 | □ | □ | □ | □ | □ | hypothetical protein                                       | PF00205.15 | TPP_enzyme_M(Thiamine<br>pyrophosphate enzyme, central<br>domain)    |
| Supercontig_1.11_MV<br>LG_01777_11sp | -435,39753 | -434,89183 | 1,0114  | 0,39692 | NS | 0 | □ | □ | □ | □ | □ | hypothetical protein                                       | PF03372.16 | Exo_endo_phos(Endonuclease/<br>Exonuclease/phosphatase<br>family)    |
| Supercontig_1.16_MV<br>LG_02210_8sp  | -421,96176 | -421,96176 | 0       | 0       | NS | 0 | □ | □ | □ | □ | □ | hypothetical protein                                       | PF10615.2  | DUF2470(Protein of unknown<br>function (DUF2470))                    |
| Supercontig_1.124_MV<br>LG_06488_6sp | -671,25181 | -670,8478  | 0,80802 | 0,33236 | NS | 0 | □ | □ | □ | □ | □ | hypothetical protein                                       | NA         | NA                                                                   |
| Supercontig_1.1_MVL<br>G_00028_12sp  | -831,86718 | -831,86718 | 0       | 0       | NS | 0 | □ | □ | □ | □ | □ | hypothetical protein                                       | PF01119.12 | DNA_mis_repair(DNA mismatch<br>repair protein, C-terminal<br>domain) |
| Supercontig_1.26_MV<br>LG_03037_12sp | -358,71    | -358,71    | 0       | 0       | NS | 0 | □ | □ | □ | □ | □ | hypothetical protein                                       | PF07719.10 | TPR_2(Tetratricopeptide repeat)                                      |
| Supercontig_1.58_MV<br>LG_04852_9sp  | -1329,1504 | -1328,1015 | 2,0977  | 0,64966 | NS | 0 | □ | □ | □ | □ | □ | hypothetical protein                                       | PF00293.21 | NUDIX(NUDIX domain)                                                  |
| Supercontig_1.67_MV<br>LG_05215_10sp | -373,47753 | -373,38769 | 0,17968 | 0,08592 | NS | 0 | □ | □ | □ | □ | □ | hypothetical protein                                       | NA         | NA                                                                   |
| Supercontig_1.41_MV<br>LG_03979_9sp  | -460,4299  | -460,42949 | 0,00082 | 0,00041 | NS | 0 | □ | □ | □ | □ | □ | ubiquitin-conjugating<br>enzyme E2-18 kDa                  | PF00179.19 | UQ_con(Ubiquitin-conjugating<br>enzyme)                              |
| Supercontig_1.62_MV<br>LG_05001_8sp  | -502,95445 | -502,95445 | 0       | 0       | NS | 0 | □ | □ | □ | □ | □ | hypothetical protein                                       | NA         | NA                                                                   |
| Supercontig_1.81_MV<br>LG_05687_10sp | -1027,6669 | -1027,6669 | 0       | 0       | NS | 0 | □ | □ | □ | □ | □ | hypothetical protein                                       | PF00097.18 | zf-C3HC4(Zinc finger, C3HC4<br>type (RING finger))                   |



|                                       |            |            |         |         |    |   |  |  |  |  |                                    |            |                                                                    |
|---------------------------------------|------------|------------|---------|---------|----|---|--|--|--|--|------------------------------------|------------|--------------------------------------------------------------------|
| Supercontig_1.41_MV<br>LG_03980_7sp   | -1081,9789 | -1081,9789 | 0       | 0       | NS | 0 |  |  |  |  | hypothetical protein               | PF12460.1  | MMS19_N(NER and RNAPII transcription protein n terminal)           |
| Supercontig_1.1_MVL<br>G_00099_8sp    | -863,98752 | -863,98748 | 0,00016 | 0,00016 | NS | 0 |  |  |  |  | squalene synthase                  | PF00494.12 | SQS_PSY(Squalene/phytoene synthase)                                |
| Supercontig_1.24_MV<br>LG_02836_8sp   | -430,26137 | -430,26137 | 0       | 0       | NS | 0 |  |  |  |  | hypothetical protein               | NA         | NA                                                                 |
| Supercontig_1.28_MV<br>LG_03189_10sp  | -1035,6732 | -1035,6732 | 0       | 0       | NS | 0 |  |  |  |  | hypothetical protein               | PF09454.3  | Vps23_core(Vps23 core domain)                                      |
| Supercontig_1.128_MV<br>LG_06555_10sp | -1653,3954 | -1652,928  | 0,9349  | 0,3734  | NS | 0 |  |  |  |  | hypothetical protein               | PF08514.4  | STAG(STAG domain)                                                  |
| Supercontig_1.247_MV<br>LG_07212_7sp  | -477,47738 | -477,47738 | 0       | 0       | NS | 0 |  |  |  |  | hypothetical protein               | NA         | NA                                                                 |
| Supercontig_1.26_MV<br>LG_03046_10sp  | -296,52936 | -296,52936 | 0       | 0       | NS | 0 |  |  |  |  | ubiquitin thioesterase             | PF12436.1  | USP7(Ubiquitin-specific protease 7)                                |
| Supercontig_1.3_MVL<br>G_00574_10sp   | -393,29609 | -393,29601 | 0,00016 | 0,00016 | NS | 0 |  |  |  |  | CMGC/GSK protein kinase            | PF07714.10 | Pkinase_Tyr(Protein tyrosine kinase)                               |
| Supercontig_1.3_MVL<br>G_00490_7sp    | -880,67446 | -880,67467 | 0       | 0       | NS | 0 |  |  |  |  | hypothetical protein               | PF11735.1  | CAP59_mtransfer(Cryptococcal mannosyltransferase 1)                |
| Supercontig_1.56_MV<br>LG_04755_9sp   | -699,32975 | -698,62986 | 1,39978 | 0,50336 | NS | 0 |  |  |  |  | hypothetical protein               | NA         | NA                                                                 |
| Supercontig_1.127_MV<br>LG_06535_6sp  | -476,6966  | -476,68432 | 0,02456 | 0,0122  | NS | 0 |  |  |  |  | hypothetical protein               | NA         | NA                                                                 |
| Supercontig_1.77_MV<br>LG_05542_10sp  | -858,82897 | -857,36206 | 2,93382 | 0,76936 | NS | 0 |  |  |  |  | hypothetical protein               | PF00642.17 | zf-CCCH(Zinc finger C-x8-C-x5-C-x3-H type (and similar))           |
| Supercontig_1.85_MV<br>LG_05814_6sp   | -304,19164 | -304,19149 | 0,0003  | 0,00015 | NS | 0 |  |  |  |  | 3-hydroxybutyryl-CoA dehydrogenase | PF00725.15 | 3HCDH(3-hydroxyacyl-CoA dehydrogenase, C-terminal domain)          |
| Supercontig_1.117_MV<br>LG_06401_7sp  | -726,52513 | -726,52425 | 0,00176 | 0,00088 | NS | 0 |  |  |  |  | hypothetical protein               | PF04777.6  | Evr1_Alr(Erv1 / Alr family)                                        |
| Supercontig_1.9_MVL<br>G_01545_8sp    | -624,68794 | -624,68794 | 0       | 0       | NS | 0 |  |  |  |  | hypothetical protein               | PF02182.10 | YDG_SRA(YDG/SRA domain)                                            |
| Supercontig_1.132_MV<br>LG_06601_11sp | -294,21899 | -294,21878 | 0,00042 | 0,00021 | NS | 0 |  |  |  |  | glutamine synthetase               | PF00120.17 | Gln-synt_C(Glutamine synthetase, catalytic domain)                 |
| Supercontig_1.180_MV<br>LG_06998_9sp  | -1989,775  | -1986,6371 | 6,27586 | 0,95663 | ** | 0 |  |  |  |  | hypothetical protein               | PF03061.15 | 4HBT(Thioesterase superfamily)                                     |
| Supercontig_1.7_MVL<br>G_01223_12sp   | -620,94383 | -618,41504 | 5,05758 | 0,92024 | *  | 0 |  |  |  |  | hypothetical protein               | PF00780.15 | CNH(CNH domain)                                                    |
| Supercontig_1.27_MV<br>LG_03077_8sp   | -1250,8972 | -1250,0859 | 1,62256 | 0,55571 | NS | 0 |  |  |  |  | hypothetical protein               | PF00172.11 | Zn_clus(Fungal Zn(2)-Cys(6) binuclear cluster domain)              |
| Supercontig_1.41_MV<br>LG_04022_8sp   | -569,77959 | -569,75671 | 0,04576 | 0,02262 | NS | 0 |  |  |  |  | hypothetical protein               | PF00177.14 | Ribosomal_S7(Ribosomal protein S7p/S5e)                            |
| Supercontig_1.160_MV<br>LG_06854_7sp  | -1078,9866 | -1078,8156 | 0,34214 | 0,15724 | NS | 0 |  |  |  |  | hypothetical protein               | PF00067.15 | p450(Cytochrome P450)                                              |
| Supercontig_1.11_MV<br>LG_01688_11sp  | -514,04639 | -512,88579 | 2,3212  | 0,6867  | NS | 0 |  |  |  |  | hypothetical protein               | NA         | NA                                                                 |
| Supercontig_1.4_MVL<br>G_00733_7sp    | -453,2099  | -453,20978 | 0,00024 | 0,00012 | NS | 0 |  |  |  |  | hypothetical protein               | PF12333.1  | Ipi1_N(Rix1 complex component involved in 60S ribosome maturation) |
| Supercontig_1.1_MVL<br>G_00165_10sp   | -382,93986 | -382,93986 | 0       | 0       | NS | 0 |  |  |  |  | hypothetical protein               | NA         | NA                                                                 |

|                                      |            |            |         |         |    |   |   |   |   |   |                                               |            |                                                                                   |
|--------------------------------------|------------|------------|---------|---------|----|---|---|---|---|---|-----------------------------------------------|------------|-----------------------------------------------------------------------------------|
| Supercontig_1.33_MV<br>LG_03473_12sp | -512,13973 | -512,13911 | 0,00124 | 0,00062 | NS | 0 | □ | □ | □ | □ | STE/STE20/PAKA<br>protein kinase              | PF07714.10 | Pkinase_Tyr(Protein tyrosine<br>kinase)                                           |
| Supercontig_1.124_MV<br>LG_06495_9sp | -462,67269 | -462,67262 | 0,00014 | 0,00016 | NS | 0 | □ | □ | □ | □ | hypothetical protein                          | PF07798.4  | DUF1640(Protein of unknown<br>function (DUF1640))                                 |
| Supercontig_1.74_MV<br>LG_05473_7sp  | -724,93228 | -724,49157 | 0,88142 | 0,35642 | NS | 0 | □ | □ | □ | □ | biotin synthase                               | PF06968.6  | BATS(Biotin and Thiamin<br>Synthesis associated domain)                           |
| Supercontig_1.9_MVL<br>G_01555_8sp   | -918,42253 | -918,42253 | 0       | 0       | NS | 0 | □ | □ | □ | □ | hypothetical protein                          | PF00617.12 | RasGEF(RasGEF domain)                                                             |
| Supercontig_1.28_MV<br>LG_03205_7sp  | -1177,1585 | -1177,1585 | 0       | 0       | NS | 0 | □ | □ | □ | □ | hypothetical protein                          | PF08477.6  | Miro(Miro-like protein)                                                           |
| Supercontig_1.11_MV<br>LG_01708_10sp | -1076,6066 | -1076,2645 | 0,6841  | 0,28969 | NS | 0 | □ | □ | □ | □ | hypothetical protein                          | PF01968.11 | Hydantoinase_A(Hydantoinase/o<br>xoprolinase)                                     |
| Supercontig_1.12_MV<br>LG_01876_12sp | -379,95848 | -379,95846 | 0,00016 | 0,00016 | NS | 0 | □ | □ | □ | □ | hypothetical protein                          | PF00072.17 | Response_reg(Response<br>regulator receiver domain)                               |
| Supercontig_1.6_MVL<br>G_01103_7sp   | -833,20852 | -833,20852 | 0       | 0       | NS | 0 | □ | □ | □ | □ | aminotransferase                              | PF01053.13 | Cys_Met_Meta_PP(Cys/Met<br>metabolism PLP-dependent<br>enzyme)                    |
| Supercontig_1.87_MV<br>LG_05850_10sp | -508,53028 | -508,53028 | 0       | 0       | NS | 0 | □ | □ | □ | □ | hypothetical protein                          | PF00013.22 | KH_1(KH domain)                                                                   |
| Supercontig_1.41_MV<br>LG_04011_10sp | -765,248   | -765,248   | 0       | 0       | NS | 0 | □ | □ | □ | □ | hypothetical protein                          | PF02515.10 | CoA_transf_3(CoA-transferase<br>family III)                                       |
| Supercontig_1.3_MVL<br>G_00514_8sp   | -619,74882 | -619,74853 | 0,00058 | 0,00029 | NS | 0 | □ | □ | □ | □ | hypothetical protein                          | NA         | NA                                                                                |
| Supercontig_1.7_MVL<br>G_01257_10sp  | -331,315   | -331,3022  | 0,0256  | 0,01272 | NS | 0 | □ | □ | □ | □ | V-type proton ATPase<br>proteolipid subunit 2 | TIGR01100  | TIGR01100(V_ATP_synt_C: V-<br>type ATPase, C subunit)                             |
| Supercontig_1.46_MV<br>LG_04252_11sp | -496,91006 | -496,8159  | 0,18832 | 0,08986 | NS | 0 | □ | □ | □ | □ | hypothetical protein                          | PF02167.8  | Cytochrom_C1(Cytochrome C1<br>family)                                             |
| Supercontig_1.86_MV<br>LG_05829_11sp | -451,37142 | -451,37142 | 0       | 0       | NS | 0 | □ | □ | □ | □ | hypothetical protein                          | PF04082.11 | Fungal_trans(Fungal specific<br>transcription factor domain)                      |
| Supercontig_1.33_MV<br>LG_03459_11sp | -366,40474 | -365,74288 | 1,32372 | 0,48411 | NS | 0 | □ | □ | □ | □ | hypothetical protein                          | PF00787.17 | PX(PX domain)                                                                     |
| Supercontig_1.25_MV<br>LG_02969_11sp | -345,78901 | -345,78901 | 0       | 0       | NS | 0 | □ | □ | □ | □ | hypothetical protein                          | PF00128.17 | Alpha-amylase(Alpha amylase,<br>catalytic domain)                                 |
| Supercontig_1.16_MV<br>LG_02234_8sp  | -845,41156 | -845,41147 | 0,00018 | 0,00016 | NS | 0 | □ | □ | □ | □ | hypothetical protein                          | PF10375.2  | GRAB(GRIP-related Arf-binding<br>domain)                                          |
| Supercontig_1.41_MV<br>LG_04034_9sp  | -443,22921 | -443,22921 | 0       | 0       | NS | 0 | □ | □ | □ | □ | hypothetical protein                          | PF00153.20 | Mito_carr(Mitochondrial carrier<br>protein)                                       |
| Supercontig_1.47_MV<br>LG_04322_6sp  | -579,58398 | -579,58398 | 0       | 0       | NS | 0 | □ | □ | □ | □ | hypothetical protein                          | NA         | NA                                                                                |
| Supercontig_1.96_MV<br>LG_06052_8sp  | -501,58346 | -500,08539 | 2,99614 | 0,77644 | NS | 0 | □ | □ | □ | □ | hypothetical protein                          | PF00564.17 | PB1(PB1 domain)                                                                   |
| Supercontig_1.46_MV<br>LG_04297_11sp | -441,48916 | -441,48913 | 0,00016 | 0,00016 | NS | 0 | □ | □ | □ | □ | hypothetical protein                          | PF00319.11 | SRF-TF(SRF-type transcription<br>factor (DNA-binding and<br>dimerisation domain)) |
| Supercontig_1.4_MVL<br>G_00817_9sp   | -627,67207 | -627,67207 | 0       | 0       | NS | 0 | □ | □ | □ | □ | hypothetical protein                          | PF05255.4  | UPF0220(Uncharacterised<br>protein family (UPF0220))                              |
| Supercontig_1.84_MV<br>LG_05778_12sp | -777,60407 | -776,43111 | 2,34592 | 0,69055 | NS | 0 | □ | □ | □ | □ | 60S ribosomal protein<br>L5-B                 | PF00861.15 | Ribosomal_L18p(Ribosomal<br>L18p/L5e family)                                      |
| Supercontig_1.8_MVL<br>G_01363_10sp  | -813,40227 | -813,39747 | 0,0096  | 0,00479 | NS | 0 | □ | □ | □ | □ | hypothetical protein                          | PF08242.5  | Methyltransf_12(Methyltransferase<br>domain)                                      |

|                                       |            |            |         |         |    |   |   |   |   |   |                               |            |                                                                              |
|---------------------------------------|------------|------------|---------|---------|----|---|---|---|---|---|-------------------------------|------------|------------------------------------------------------------------------------|
| Supercontig_1.29_MV<br>LG_03253_7sp   | -388,46036 | -388,46017 | 0,00038 | 0,00019 | NS | 0 | □ | □ | □ | □ | 40S ribosomal protein<br>S20  | TIGR01046  | TIGR01046(S10_Arc_S20_Euk:<br>ribosomal protein S10)                         |
| Supercontig_1.47_MV<br>LG_04302_7sp   | -499,04818 | -498,70132 | 0,69372 | 0,2931  | NS | 0 | □ | □ | □ | □ | hypothetical protein          | PF00083.17 | Sugar_tr(Sugar (and other)<br>transporter)                                   |
| Supercontig_1.16_MV<br>LG_02225_8sp   | -338,57461 | -338,57441 | 0,0004  | 0,0002  | NS | 0 | □ | □ | □ | □ | hypothetical protein          | PF04003.5  | Utp12(Dip2/Utp12 Family)                                                     |
| Supercontig_1.54_MV<br>LG_04669_6sp   | -621,59507 | -621,59491 | 0,00032 | 0,00016 | NS | 0 | □ | □ | □ | □ | hypothetical protein          | NA         | NA                                                                           |
| Supercontig_1.8_MVL<br>G_01365_12sp   | -349,66459 | -349,66455 | 0,00016 | 0,00016 | NS | 0 | □ | □ | □ | □ | hypothetical protein          | NA         | NA                                                                           |
| Supercontig_1.110_MV<br>LG_06300_12sp | -1185,6342 | -1185,5617 | 0,14516 | 0,07001 | NS | 0 | □ | □ | □ | □ | hypothetical protein          | PF00415.11 | RCC1(Regulator of chromosome<br>condensation (RCC1) repeat)                  |
| Supercontig_1.49_MV<br>LG_04401_10sp  | -1009,4285 | -1008,57   | 1,71694 | 0,57619 | NS | 0 | □ | □ | □ | □ | hypothetical protein          | NA         | NA                                                                           |
| Supercontig_1.55_MV<br>LG_04715_7sp   | -908,26352 | -908,26352 | 0       | 0       | NS | 0 | □ | □ | □ | □ | hypothetical protein          | PF00294.17 | PfkB(pfkB family carbohydrate<br>kinase)                                     |
| Supercontig_1.28_MV<br>LG_03155_7sp   | -368,98345 | -368,98321 | 0,00048 | 0,00024 | NS | 0 | □ | □ | □ | □ | hypothetical protein          | PF01679.10 | UPF0057(Uncharacterized<br>protein family UPF0057)                           |
| Supercontig_1.29_MV<br>LG_03248_11sp  | -518,00186 | -517,75059 | 0,50254 | 0,22219 | NS | 0 | □ | □ | □ | □ | hypothetical protein          | PF00172.11 | Zn_clus(Fungal Zn(2)-Cys(6)<br>binuclear cluster domain)                     |
| Supercontig_1.87_MV<br>LG_05846_7sp   | -837,187   | -837,18534 | 0,00332 | 0,00166 | NS | 0 | □ | □ | □ | □ | hypothetical protein          | NA         | NA                                                                           |
| Supercontig_1.66_MV<br>LG_05169_9sp   | -890,22036 | -888,80648 | 2,82776 | 0,7568  | NS | 0 | □ | □ | □ | □ | dihydroxy-acid<br>dehydratase | PF00920.14 | ILVD_EDD(Dehydratase family)                                                 |
| Supercontig_1.104_MV<br>LG_06207_7sp  | -475,19827 | -473,62369 | 3,14916 | 0,79291 | NS | 0 | □ | □ | □ | □ | hypothetical protein          | PF03073.8  | TspO_MBR(TspO/MBR family)                                                    |
| Supercontig_1.15_MV<br>LG_02055_7sp   | -603,90644 | -603,90644 | 0       | 0       | NS | 0 | □ | □ | □ | □ | hypothetical protein          | TIGR00322  | TIGR00322(diphth2_R:<br>diphthamide biosynthesis<br>enzyme Dph1/Dph2 domain) |
| Supercontig_1.14_MV<br>LG_02029_7sp   | -1989,6989 | -1989,5571 | 0,28346 | 0,13214 | NS | 0 | □ | □ | □ | □ | hypothetical protein          | NA         | NA                                                                           |
| Supercontig_1.5_MVL<br>G_00929_6sp    | -836,61236 | -835,63758 | 1,94956 | 0,62272 | NS | 0 | □ | □ | □ | □ | hypothetical protein          | PF05769.4  | DUF837(Protein of unknown<br>function (DUF837))                              |
| Supercontig_1.1_MVL<br>G_00083_6sp    | -655,54037 | -655,54037 | 0       | 0       | NS | 0 | □ | □ | □ | □ | hypothetical protein          | PF00967.10 | Barwin(Barwin family)                                                        |
| Supercontig_1.38_MV<br>LG_03819_8sp   | -1028,4647 | -1028,4647 | 0       | 0       | NS | 0 | □ | □ | □ | □ | hypothetical protein          | PF00153.20 | Mito_carr(Mitochondrial carrier<br>protein)                                  |
| Supercontig_1.83_MV<br>LG_05735_7sp   | -537,9125  | -537,82136 | 0,18228 | 0,08711 | NS | 0 | □ | □ | □ | □ | hypothetical protein          | NA         | NA                                                                           |
| Supercontig_1.24_MV<br>LG_02864_11sp  | -759,11728 | -757,12006 | 3,99444 | 0,86429 | NS | 0 | □ | □ | □ | □ | hypothetical protein          | NA         | NA                                                                           |
| Supercontig_1.135_MV<br>LG_06631_8sp  | -769,59221 | -769,59221 | 0       | 0       | NS | 0 | □ | □ | □ | □ | hypothetical protein          | NA         | NA                                                                           |
| Supercontig_1.74_MV<br>LG_05458_7sp   | -641,24255 | -641,24255 | 0       | 0       | NS | 0 | □ | □ | □ | □ | hypothetical protein          | NA         | NA                                                                           |
| Supercontig_1.60_MV<br>LG_04942_9sp   | -1057,227  | -1057,227  | 0       | 0       | NS | 0 | □ | □ | □ | □ | hypothetical protein          | PF06609.6  | TRI12(Fungal trichothecene<br>efflux pump (TRI12))                           |
| Supercontig_1.19_MV<br>LG_02447_10sp  | -713,73299 | -713,51474 | 0,4365  | 0,19608 | NS | 0 | □ | □ | □ | □ | hypothetical protein          | PF00580.14 | UvrD-helicase(UvrD/REP<br>helicase)                                          |
| Supercontig_1.22_MV<br>LG_02753_12sp  | -572,84272 | -571,63474 | 2,41596 | 0,7012  | NS | 0 | □ | □ | □ | □ | hypothetical protein          | PF02985.15 | HEAT(HEAT repeat)                                                            |



|                                      |            |            |         |         |    |   |   |   |   |                                                  |            |                                                            |
|--------------------------------------|------------|------------|---------|---------|----|---|---|---|---|--------------------------------------------------|------------|------------------------------------------------------------|
| Supercontig_1.7_MVL<br>G_01235_9sp   | -373,43592 | -373,43554 | 0,00076 | 0,00038 | NS | 0 | □ | □ | □ | 60S ribosomal protein<br>L23                     | PF00238.12 | Ribosomal_L14(Ribosomal<br>protein L14p/L23e)              |
| Supercontig_1.120_MV<br>LG_06422_9sp | -1009,1263 | -1009,1263 | 0       | 0       | NS | 0 | □ | □ | □ | hypothetical protein                             | NA         | NA                                                         |
| Supercontig_1.2_MVL<br>G_00340_6sp   | -734,87859 | -734,85995 | 0,03728 | 0,01847 | NS | 0 | □ | □ | □ | hypothetical protein                             | NA         | NA                                                         |
| Supercontig_1.96_MV<br>LG_06043_9sp  | -973,91756 | -973,91756 | 0       | 0       | NS | 0 | □ | □ | □ | cytoplasmic dynein 1<br>heavy chain 1            | PF07728.7  | AAA_5(AAA domain (dynein-<br>related subfamily))           |
| Supercontig_1.61_MV<br>LG_04986_9sp  | -1725,1922 | -1724,9121 | 0,56008 | 0,24425 | NS | 0 | □ | □ | □ | hypothetical protein                             | PF07792.5  | DUF1630(Protein of unknown<br>function (DUF1630))          |
| Supercontig_1.41_MV<br>LG_04037_10sp | -465,93842 | -465,93822 | 0,0004  | 0,0002  | NS | 0 | □ | □ | □ | serine/threonine-<br>protein phosphatase<br>PP-Z | PF00149.21 | Metallophos(Calcineurin-like<br>phosphoesterase)           |
| Supercontig_1.7_MVL<br>G_01296_7sp   | -990,09302 | -989,41084 | 1,36436 | 0,49449 | NS | 0 | □ | □ | □ | hypothetical protein                             | PF07690.9  | MFS_1(Major Facilitator<br>Superfamily)                    |
| Supercontig_1.6_MVL<br>G_01132_9sp   | -540,9165  | -540,91641 | 0,00018 | 0,00016 | NS | 0 | □ | □ | □ | hypothetical protein                             | NA         | NA                                                         |
| Supercontig_1.121_MV<br>LG_06442_9sp | -533,64401 | -533,644   | 0,00016 | 0,00016 | NS | 0 | □ | □ | □ | hypothetical protein                             | NA         | NA                                                         |
| Supercontig_1.24_MV<br>LG_02840_10sp | -391,33696 | -391,33693 | 0,00016 | 0,00016 | NS | 0 | □ | □ | □ | hypothetical protein                             | TIGR02967  | TIGR02967(guan_deamin:<br>guanine deaminase)               |
| Supercontig_1.141_MV<br>LG_06690_7sp | -678,89459 | -678,89455 | 0,00016 | 0,00016 | NS | 0 | □ | □ | □ | hypothetical protein                             | PF01027.13 | UPF0005(Uncharacterised<br>protein family UPF0005)         |
| Supercontig_1.63_MV<br>LG_05085_9sp  | -344,81848 | -344,8181  | 0,00016 | 0,00016 | NS | 0 | □ | □ | □ | hypothetical protein                             | PF00400.25 | WD40(WD domain, G-beta<br>repeat)                          |
| Supercontig_1.28_MV<br>LG_03182_11sp | -415,00846 | -415,00837 | 0,00016 | 0,00016 | NS | 0 | □ | □ | □ | hypothetical protein                             | PF05024.8  | Gpi1(N-acetylglucosaminyl<br>transferase component (Gpi1)) |
| Supercontig_1.24_MV<br>LG_02850_8sp  | -731,23027 | -730,97005 | 0,52044 | 0,22912 | NS | 0 | □ | □ | □ | hypothetical protein                             | PF01425.14 | Amidase(Amidase)                                           |
| Supercontig_1.73_MV<br>LG_05432_8sp  | -673,05872 | -673,05841 | 0,00062 | 0,00031 | NS | 0 | □ | □ | □ | hypothetical protein                             | PF02020.11 | W2(eIF4-gamma/eIF5/eIF2-<br>epsilon)                       |
| Supercontig_1.56_MV<br>LG_04766_10sp | -518,47234 | -516,5574  | 3,82988 | 0,85265 | NS | 0 | □ | □ | □ | hypothetical protein                             | PF00790.12 | VHS(VHS domain)                                            |
| Supercontig_1.67_MV<br>LG_05231_7sp  | -808,16344 | -808,16344 | 0       | 0       | NS | 0 | □ | □ | □ | hypothetical protein                             | PF00664.16 | ABC_membrane(ABC<br>transporter transmembrane<br>region)   |
| Supercontig_1.3_MVL<br>G_00635_10sp  | -847,2768  | -847,2768  | 0       | 0       | NS | 0 | □ | □ | □ | hypothetical protein                             | TIGR01494  | TIGR01494(ATPase_P-type:<br>HAD ATPase, P-type, family IC) |
| Supercontig_1.24_MV<br>LG_02903_6sp  | -751,28758 | -751,26444 | 0,04628 | 0,02287 | NS | 0 | □ | □ | □ | hypothetical protein                             | PF08613.4  | Cyclin(Cyclin)                                             |
| Supercontig_1.40_MV<br>LG_03944_12sp | -557,03775 | -556,55289 | 0,96972 | 0,38422 | NS | 0 | □ | □ | □ | PEK/GCN2 protein<br>kinase                       | PF07714.10 | Pkinase_Tyr(Protein tyrosine<br>kinase)                    |
| Supercontig_1.18_MV<br>LG_02355_12sp | -366,5115  | -366,51146 | 0,00016 | 0,00016 | NS | 0 | □ | □ | □ | hypothetical protein                             | PF07717.9  | DUF1605(Domain of unknown<br>function (DUF1605))           |
| Supercontig_1.2_MVL<br>G_00295_9sp   | -1648,0739 | -1648,0739 | 0       | 0       | NS | 0 | □ | □ | □ | hypothetical protein                             | PF06920.6  | Ded_cyto(Dedicator of<br>cytokinesis)                      |
| Supercontig_1.9_MVL<br>G_01546_9sp   | -614,65107 | -614,65107 | 0       | 0       | NS | 0 | □ | □ | □ | hypothetical protein                             | NA         | NA                                                         |
| Supercontig_1.58_MV<br>LG_04851_12sp | -402,97294 | -402,97267 | 0,00054 | 0,00027 | NS | 0 | □ | □ | □ | hypothetical protein                             | PF04109.9  | APG9(Autophagy protein Apg9)                               |

|                                      |            |            |         |         |    |   |   |   |   |   |   |   |   |   |   |   |   |   |   |   |                                                 |            |                                                                    |
|--------------------------------------|------------|------------|---------|---------|----|---|---|---|---|---|---|---|---|---|---|---|---|---|---|---|-------------------------------------------------|------------|--------------------------------------------------------------------|
| Supercontig_1.65_MV<br>LG_05127_10sp | -451,02256 | -450,89383 | 0,25746 | 0,12079 | NS | 0 | 0 | 0 | 0 | 0 | 0 | 0 | 0 | 0 | 0 | 0 | 0 | 0 | 0 | 0 | hypothetical protein                            | PF03232.6  | COQ7(Ubiquinone biosynthesis protein COQ7)                         |
| Supercontig_1.64_MV<br>LG_05098_9sp  | -781,00512 | -781,06534 | 0       | 0       | NS | 0 | 0 | 0 | 0 | 0 | 0 | 0 | 0 | 0 | 0 | 0 | 0 | 0 | 0 | 0 | hypothetical protein                            | PF07039.4  | DUF1325(SGF29 tudor-like domain)                                   |
| Supercontig_1.12_MV<br>LG_01825_10sp | -343,22551 | -343,22543 | 0,00016 | 0,00016 | NS | 0 | 0 | 0 | 0 | 0 | 0 | 0 | 0 | 0 | 0 | 0 | 0 | 0 | 0 | 0 | aspartate<br>aminotransferase                   | PF00155.14 | Aminotran_1_2(Aminotransferase class I and II)                     |
| Supercontig_1.57_MV<br>LG_04838_8sp  | -339,74506 | -339,74487 | 0,00038 | 0,00019 | NS | 0 | 0 | 0 | 0 | 0 | 0 | 0 | 0 | 0 | 0 | 0 | 0 | 0 | 0 | 0 | hypothetical protein                            | PF07716.8  | bZIP_2(Basic region leucine zipper)                                |
| Supercontig_1.61_MV<br>LG_04961_8sp  | -562,47791 | -562,43981 | 0,0762  | 0,03738 | NS | 0 | 0 | 0 | 0 | 0 | 0 | 0 | 0 | 0 | 0 | 0 | 0 | 0 | 0 | 0 | methylene-fatty-acyl-<br>phospholipid synthase  | PF04191.6  | PEMT(Phospholipid methyltransferase)                               |
| Supercontig_1.32_MV<br>LG_03409_8sp  | -463,02017 | -463,02017 | 0       | 0       | NS | 0 | 0 | 0 | 0 | 0 | 0 | 0 | 0 | 0 | 0 | 0 | 0 | 0 | 0 | 0 | hypothetical protein                            | PF00501.21 | AMP-binding(AMP-binding enzyme)                                    |
| Supercontig_1.52_MV<br>LG_04574_8sp  | -610,83212 | -610,83203 | 0,00018 | 0,00016 | NS | 0 | 0 | 0 | 0 | 0 | 0 | 0 | 0 | 0 | 0 | 0 | 0 | 0 | 0 | 0 | actin-2                                         | PF00022.12 | Actin(Actin)                                                       |
| Supercontig_1.6_MVL<br>G_01058_9sp   | -1078,3633 | -1078,3633 | 0       | 0       | NS | 0 | 0 | 0 | 0 | 0 | 0 | 0 | 0 | 0 | 0 | 0 | 0 | 0 | 0 | 0 | hypothetical protein                            | NA         | NA                                                                 |
| Supercontig_1.34_MV<br>LG_03535_6sp  | -712,09609 | -712,09595 | 0,00028 | 0,00014 | NS | 0 | 0 | 0 | 0 | 0 | 0 | 0 | 0 | 0 | 0 | 0 | 0 | 0 | 0 | 0 | hypothetical protein                            | PF03357.14 | Snf7(Snf7)                                                         |
| Supercontig_1.58_MV<br>LG_04854_9sp  | -618,99179 | -618,93594 | 0,1117  | 0,05432 | NS | 0 | 0 | 0 | 0 | 0 | 0 | 0 | 0 | 0 | 0 | 0 | 0 | 0 | 0 | 0 | hypothetical protein                            | PF00135.21 | COesterase(Carboxylesterase)                                       |
| Supercontig_1.7_MVL<br>G_01344_11sp  | -467,312   | -467,312   | 0       | 0       | NS | 0 | 0 | 0 | 0 | 0 | 0 | 0 | 0 | 0 | 0 | 0 | 0 | 0 | 0 | 0 | hypothetical protein                            | PF03151.9  | TPT(Triose-phosphate Transporter family)                           |
| Supercontig_1.5_MVL<br>G_01026_7sp   | -427,01394 | -426,88945 | 0,24898 | 0,11705 | NS | 0 | 0 | 0 | 0 | 0 | 0 | 0 | 0 | 0 | 0 | 0 | 0 | 0 | 0 | 0 | hypothetical protein                            | PF03144.18 | GTP_EFTU_D2(Elongation factor Tu domain 2)                         |
| Supercontig_1.54_MV<br>LG_04688_9sp  | -1066,9911 | -1066,9911 | 0       | 0       | NS | 0 | 0 | 0 | 0 | 0 | 0 | 0 | 0 | 0 | 0 | 0 | 0 | 0 | 0 | 0 | hypothetical protein                            | NA         | NA                                                                 |
| Supercontig_1.34_MV<br>LG_03536_10sp | -750,83454 | -750,83454 | 0       | 0       | NS | 0 | 0 | 0 | 0 | 0 | 0 | 0 | 0 | 0 | 0 | 0 | 0 | 0 | 0 | 0 | hypothetical protein                            | PF05970.7  | DUF889(PIF1 helicase)                                              |
| Supercontig_1.3_MVL<br>G_00681_7sp   | -626,6225  | -626,61355 | 0,0179  | 0,00891 | NS | 0 | 0 | 0 | 0 | 0 | 0 | 0 | 0 | 0 | 0 | 0 | 0 | 0 | 0 | 0 | hypothetical protein                            | NA         | NA                                                                 |
| Supercontig_1.83_MV<br>LG_05734_8sp  | -234,65885 | -234,65881 | 0,00016 | 0,00016 | NS | 0 | 0 | 0 | 0 | 0 | 0 | 0 | 0 | 0 | 0 | 0 | 0 | 0 | 0 | 0 | ribosomal protein<br>L37ae                      | PF01780.12 | Ribosomal_L37ae(Ribosomal L37ae protein family)                    |
| Supercontig_1.121_MV<br>LG_06435_7sp | -1075,3307 | -1075,3307 | 0       | 0       | NS | 0 | 0 | 0 | 0 | 0 | 0 | 0 | 0 | 0 | 0 | 0 | 0 | 0 | 0 | 0 | hypothetical protein                            | TIGR00879  | TIGR00879(SP: MFS transporter, sugar porter (SP) family)           |
| Supercontig_1.8_MVL<br>G_01393_6sp   | -728,75634 | -728,75634 | 0       | 0       | NS | 0 | 0 | 0 | 0 | 0 | 0 | 0 | 0 | 0 | 0 | 0 | 0 | 0 | 0 | 0 | hypothetical protein                            | PF06201.6  | PITH(C-terminal proteasome-interacting domain of thioredoxin-like) |
| Supercontig_1.70_MV<br>LG_05318_7sp  | -588,86904 | -588,86898 | 0,00012 | 0,00016 | NS | 0 | 0 | 0 | 0 | 0 | 0 | 0 | 0 | 0 | 0 | 0 | 0 | 0 | 0 | 0 | hypothetical protein                            | NA         | NA                                                                 |
| Supercontig_1.101_MV<br>LG_06160_9sp | -1035,5005 | -1035,4646 | 0,0718  | 0,03526 | NS | 0 | 0 | 0 | 0 | 0 | 0 | 0 | 0 | 0 | 0 | 0 | 0 | 0 | 0 | 0 | hypothetical protein                            | PF12223.1  | DUF3602(Protein of unknown function (DUF3602))                     |
| Supercontig_1.9_MVL<br>G_01496_8sp   | -1023,0079 | -1023,0079 | 0       | 0       | NS | 0 | 0 | 0 | 0 | 0 | 0 | 0 | 0 | 0 | 0 | 0 | 0 | 0 | 0 | 0 | hypothetical protein                            | PF00171.15 | Aldedh(Aldehyde dehydrogenase family)                              |
| Supercontig_1.42_MV<br>LG_04080_6sp  | -1068,0636 | -1067,7702 | 0,58684 | 0,25429 | NS | 0 | 0 | 0 | 0 | 0 | 0 | 0 | 0 | 0 | 0 | 0 | 0 | 0 | 0 | 0 | hypothetical protein                            | TIGR00446  | TIGR00446(nop2p: NOL1/NOP2/sun family putative RNA methylase)      |
| Supercontig_1.1_MVL<br>G_00040_8sp   | -285,38083 | -285,38054 | 0,00058 | 0,00029 | NS | 0 | 0 | 0 | 0 | 0 | 0 | 0 | 0 | 0 | 0 | 0 | 0 | 0 | 0 | 0 | transitional<br>endoplasmic reticulum<br>ATPase | PF07724.7  | AAA_2(AAA domain (Cdc48 subfamily))                                |



|                                       |            |            |         |         |    |   |   |   |   |                        |            |                                                                              |
|---------------------------------------|------------|------------|---------|---------|----|---|---|---|---|------------------------|------------|------------------------------------------------------------------------------|
| Supercontig_1.29_MV<br>LG_03217_10sp  | -565,75079 | -565,75059 | 0,0004  | 0,0002  | NS | 0 | □ | □ | □ | ATP-citrate synthase   | PF02629.12 | CoA_binding(CoA binding domain)                                              |
| Supercontig_1.6_MVL<br>G_01173_10sp   | -826,43064 | -826,43058 | 0,00012 | 0,00016 | NS | 0 | □ | □ | □ | hypothetical protein   | PF03016.8  | Exostosin(Exostosin family)                                                  |
| Supercontig_1.16_MV<br>LG_02227_6sp   | -822,20384 | -822,20384 | 0       | 0       | NS | 0 | □ | □ | □ | coatomer subunit alpha | PF06957.4  | COPI_C(Coatomer (COPI) alpha subunit C-terminus)                             |
| Supercontig_1.5_MVL<br>G_00982_6sp    | -1343,3426 | -1343,0493 | 0,5866  | 0,2542  | NS | 0 | □ | □ | □ | hypothetical protein   | PF00097.18 | zf-C3HC4(Zinc finger, C3HC4 type (RING finger))                              |
| Supercontig_1.8_MVL<br>G_01455_8sp    | -445,87741 | -445,4689  | 0,81702 | 0,33536 | NS | 0 | □ | □ | □ | hypothetical protein   | PF02045.8  | CBFB_NFYA(CCAAT-binding transcription factor (CBF-B/NFYA) subunit B)         |
| Supercontig_1.34_MV<br>LG_03571_7sp   | -475,06367 | -475,06358 | 0,00018 | 0,00016 | NS | 0 | □ | □ | □ | hypothetical protein   | PF01329.12 | Pterin_4a(Pterin 4 alpha carbinolamine dehydratase)                          |
| Supercontig_1.8_MVL<br>G_01388_7sp    | -361,92673 | -360,04031 | 3,77284 | 0,84839 | NS | 0 | □ | □ | □ | hypothetical protein   | PF10521.2  | DUF2454(Protein of unknown function (DUF2454))                               |
| Supercontig_1.1_MVL<br>G_00086_12sp   | -359,76842 | -359,76824 | 0,00036 | 0,00018 | NS | 0 | □ | □ | □ | hypothetical protein   | PF00226.24 | DnaJ(DnaJ domain)                                                            |
| Supercontig_1.96_MV<br>LG_06033_11sp  | -348,42065 | -348,42048 | 0,00034 | 0,00017 | NS | 0 | □ | □ | □ | hypothetical protein   | PF00400.25 | WD40(WD domain, G-beta repeat)                                               |
| Supercontig_1.18_MV<br>LG_02429_10sp  | -852,56544 | -852,52424 | 0,0824  | 0,04036 | NS | 0 | □ | □ | □ | hypothetical protein   | PF04851.8  | ResIII(Type III restriction enzyme, res subunit)                             |
| Supercontig_1.16_MV<br>LG_02186_9sp   | -630,10923 | -629,74695 | 0,72456 | 0,30391 | NS | 0 | □ | □ | □ | hypothetical protein   | NA         | NA                                                                           |
| Supercontig_1.24_MV<br>LG_02859_12sp  | -946,61808 | -946,61808 | 0       | 0       | NS | 0 | □ | □ | □ | hypothetical protein   | PF00560.26 | LRR_1(Leucine Rich Repeat)                                                   |
| Supercontig_1.5_MVL<br>G_00955_10sp   | -636,52796 | -636,52796 | 0       | 0       | NS | 0 | □ | □ | □ | hypothetical protein   | PF07719.10 | TPR_2(Tetratricopeptide repeat)                                              |
| Supercontig_1.5_MVL<br>G_00893_7sp    | -986,88665 | -986,88661 | 0,00016 | 0,00016 | NS | 0 | □ | □ | □ | hypothetical protein   | PF01585.16 | G-patch(G-patch domain)                                                      |
| Supercontig_1.56_MV<br>LG_04796_9sp   | -465,83441 | -465,39943 | 0,86996 | 0,35272 | NS | 0 | □ | □ | □ | hypothetical protein   | NA         | NA                                                                           |
| Supercontig_1.19_MV<br>LG_02512_10sp  | -508,74012 | -508,74012 | 0       | 0       | NS | 0 | □ | □ | □ | hypothetical protein   | NA         | NA                                                                           |
| Supercontig_1.46_MV<br>LG_04247_10sp  | -637,14585 | -637,14564 | 0,00042 | 0,00021 | NS | 0 | □ | □ | □ | hypothetical protein   | PF00571.21 | CBS(CBS domain)                                                              |
| Supercontig_1.8_MVL<br>G_01395_7sp    | -750,30779 | -748,97782 | 2,65994 | 0,73551 | NS | 0 | □ | □ | □ | hypothetical protein   | PF06413.4  | Neugrin(Neugrin)                                                             |
| Supercontig_1.12_MV<br>LG_01800_9sp   | -1533,5117 | -1530,4167 | 6,18996 | 0,95472 | ** | 0 | □ | □ | □ | hypothetical protein   | PF12234.1  | Rav1p_C(RAVE protein 1 C terminal)                                           |
| Supercontig_1.41_MV<br>LG_04023_10sp  | -621,19275 | -620,9109  | 0,5637  | 0,24561 | NS | 0 | □ | □ | □ | hypothetical protein   | PF01652.11 | IF4E(Eukaryotic initiation factor 4E)                                        |
| Supercontig_1.128_MV<br>LG_06556_11sp | -520,83758 | -520,03345 | 1,60826 | 0,55252 | NS | 0 | □ | □ | □ | hypothetical protein   | PF01661.14 | Macro(Macro domain)                                                          |
| Supercontig_1.92_MV<br>LG_05954_9sp   | -332,84427 | -332,69992 | 0,2887  | 0,13442 | NS | 0 | □ | □ | □ | hypothetical protein   | PF04749.10 | PLAC8(PLAC8 family)                                                          |
| Supercontig_1.99_MV<br>LG_06105_12sp  | -468,75205 | -468,75189 | 0,00032 | 0,00016 | NS | 0 | □ | □ | □ | hypothetical protein   | TIGR00133  | TIGR00133(gatB: aspartyl/glutamyl-tRNA(Asn/Gln) amidotransferase, B subunit) |
| Supercontig_1.15_MV<br>LG_02102_11sp  | -421,34966 | -421,34966 | 0       | 0       | NS | 0 | □ | □ | □ | hypothetical protein   | TIGR00578  | TIGR00578(ku70: ATP-dependent DNA helicase ii, 70 kDa subunit (ku70))        |

|                                       |            |            |         |         |    |   |  |  |  |  |                                                        |            |                                                                 |
|---------------------------------------|------------|------------|---------|---------|----|---|--|--|--|--|--------------------------------------------------------|------------|-----------------------------------------------------------------|
| Supercontig_1.117_MV<br>LG_06395_10sp | -660,06894 | -660,02931 | 0,07926 | 0,03886 | NS | 0 |  |  |  |  | hypothetical protein                                   | NA         | NA                                                              |
| Supercontig_1.1_MVL<br>G_00027_6sp    | -656,52873 | -655,63249 | 1,79248 | 0,5919  | NS | 0 |  |  |  |  | hypothetical protein                                   | PF00098.16 | zf-CCHC(Zinc knuckle)                                           |
| Supercontig_1.85_MV<br>LG_05803_6sp   | -283,83152 | -283,78868 | 0,08568 | 0,04194 | NS | 0 |  |  |  |  | hypothetical protein                                   | PF08315.5  | cwf18(cwf18 pre-mRNA splicing factor)                           |
| Supercontig_1.2_MVL<br>G_00356_10sp   | -765,74261 | -765,66099 | 0,16324 | 0,07838 | NS | 0 |  |  |  |  | hypothetical protein                                   | PF03908.6  | Sec20(Sec20)                                                    |
| Supercontig_1.116_MV<br>LG_06377_6sp  | -736,87308 | -736,87308 | 0       | 0       | NS | 0 |  |  |  |  | mitochondrial-<br>processing peptidase<br>subunit beta | PF00675.13 | Peptidase_M16(Insulinase<br>(Peptidase family M16))             |
| Supercontig_1.1_MVL<br>G_00156_9sp    | -800,31575 | -800,31142 | 0,00866 | 0,00432 | NS | 0 |  |  |  |  | hypothetical protein                                   | NA         | NA                                                              |
| Supercontig_1.1_MVL<br>G_00092_11sp   | -388,97288 | -388,91184 | 0,12208 | 0,05921 | NS | 0 |  |  |  |  | hypothetical protein                                   | PF00226.24 | DnaJ(DnaJ domain)                                               |
| Supercontig_1.104_MV<br>LG_06209_10sp | -785,33155 | -785,33136 | 0,00038 | 0,00019 | NS | 0 |  |  |  |  | hypothetical protein                                   | PF00454.20 | PI3_PI4_kinase(Phosphatidyli-<br>sitol 3- and 4-kinase)         |
| Supercontig_1.9_MVL<br>G_01567_7sp    | -888,55537 | -888,55508 | 0,00058 | 0,00029 | NS | 0 |  |  |  |  | hypothetical protein                                   | PF00107.19 | ADH_zinc_N(Zinc-binding<br>dehydrogenase)                       |
| Supercontig_1.3_MVL<br>G_00588_10sp   | -441,25192 | -440,45383 | 1,59618 | 0,54981 | NS | 0 |  |  |  |  | hypothetical protein                                   | NA         | NA                                                              |
| Supercontig_1.15_MV<br>LG_02064_7sp   | -624,86167 | -624,50061 | 0,72212 | 0,30306 | NS | 0 |  |  |  |  | hypothetical protein                                   | PF01435.11 | Peptidase_M48(Peptidase family<br>M48)                          |
| Supercontig_1.69_MV<br>LG_05291_11sp  | -759,09744 | -759,09735 | 0,00018 | 0,00016 | NS | 0 |  |  |  |  | hypothetical protein                                   | PF11875.1  | DUF3395(Domain of unknown<br>function (DUF3395))                |
| Supercontig_1.54_MV<br>LG_04692_8sp   | -1112,9691 | -1112,7335 | 0,47108 | 0,20986 | NS | 0 |  |  |  |  | hypothetical protein                                   | NA         | NA                                                              |
| Supercontig_1.98_MV<br>LG_06081_10sp  | -894,29249 | -893,96743 | 0,65012 | 0,27752 | NS | 0 |  |  |  |  | hypothetical protein                                   | PF01433.13 | Peptidase_M1(Peptidase family<br>M1)                            |
| Supercontig_1.63_MV<br>LG_05070_8sp   | -1137,1932 | -1137,1932 | 0       | 0       | NS | 0 |  |  |  |  | hypothetical protein                                   | PF02012.13 | BNR(BNR/Asp-box repeat)                                         |
| Supercontig_1.107_MV<br>LG_06245_8sp  | -559,55282 | -559,30774 | 0,49016 | 0,21736 | NS | 0 |  |  |  |  | hypothetical protein                                   | NA         | NA                                                              |
| Supercontig_1.26_MV<br>LG_03050_11sp  | -369,06639 | -368,99914 | 0,1345  | 0,06504 | NS | 0 |  |  |  |  | hypothetical protein                                   | PF00172.11 | Zn_clus(Fungal Zn(2)-Cys(6)<br>binuclear cluster domain)        |
| Supercontig_1.1_MVL<br>G_00190_7sp    | -481,85921 | -481,85841 | 0,0016  | 0,0008  | NS | 0 |  |  |  |  | small subunit<br>ribosomal protein S7e                 | PF01251.11 | Ribosomal_S7e(Ribosomal<br>protein S7e)                         |
| Supercontig_1.1_MVL<br>G_00049_10sp   | -511,11182 | -511,08119 | 0,06126 | 0,03017 | NS | 0 |  |  |  |  | hypothetical protein                                   | PF00293.21 | NUDIX(NUDIX domain)                                             |
| Supercontig_1.75_MV<br>LG_05498_8sp   | -2053,9796 | -2053,9796 | 0       | 0       | NS | 0 |  |  |  |  | hypothetical protein                                   | NA         | NA                                                              |
| Supercontig_1.23_MV<br>LG_02806_12sp  | -681,40269 | -677,22899 | 8,3474  | 0,9846  | ** | 0 |  |  |  |  | hypothetical protein                                   | PF00447.10 | HSF_DNA-bind(HSF-type DNA-<br>binding)                          |
| Supercontig_1.93_MV<br>LG_05974_10sp  | -769,93345 | -769,93345 | 0       | 0       | NS | 0 |  |  |  |  | hypothetical protein                                   | PF01590.19 | GAF(GAF domain)                                                 |
| Supercontig_1.41_MV<br>LG_03975_6sp   | -365,45988 | -365,45942 | 0,00092 | 0,00046 | NS | 0 |  |  |  |  | histone                                                | PF00125.17 | Histone(Core histone<br>H2A/H2B/H3/H4)                          |
| Supercontig_1.34_MV<br>LG_03567_11sp  | -360,48642 | -360,27727 | 0,4183  | 0,18873 | NS | 0 |  |  |  |  | hypothetical protein                                   | PF00241.13 | Cofilin_ADF(Cofilin/tropomyosin-<br>type actin-binding protein) |

|                                       |            |            |         |         |    |   |   |   |   |                                   |            |                                                                       |
|---------------------------------------|------------|------------|---------|---------|----|---|---|---|---|-----------------------------------|------------|-----------------------------------------------------------------------|
| Supercontig_1.77_MV<br>LG_05548_11sp  | -445,07277 | -443,28734 | 3,57086 | 0,83228 | NS | 0 | 0 | 0 | 0 | hypothetical protein              | NA         | NA                                                                    |
| Supercontig_1.28_MV<br>LG_03187_10sp  | -544,24022 | -544,24022 | 0       | 0       | NS | 0 | 0 | 0 | 0 | hypothetical protein              | NA         | NA                                                                    |
| Supercontig_1.50_MV<br>LG_04458_8sp   | -370,10197 | -370,09128 | 0,02138 | 0,01063 | NS | 0 | 0 | 0 | 0 | proteasome subunit<br>beta type-7 | PF12465.1  | Pr_beta_C(Proteasome beta<br>subunits C terminal)                     |
| Supercontig_1.101_MV<br>LG_06152_10sp | -315,4448  | -315,44465 | 0,0003  | 0,00015 | NS | 0 | 0 | 0 | 0 | hypothetical protein              | PF08566.3  | Pam17(Mitochondrial import<br>protein Pam17)                          |
| Supercontig_1.1_MVL<br>G_00079_11sp   | -502,74169 | -502,68195 | 0,11948 | 0,05799 | NS | 0 | 0 | 0 | 0 | hypothetical protein              | PF08618.3  | Opi1(Transcription factor Opi1)                                       |
| Supercontig_1.20_MV<br>LG_02602_6sp   | -1007,1052 | -1006,7488 | 0,71272 | 0,29978 | NS | 0 | 0 | 0 | 0 | hypothetical protein              | PF01151.11 | ELO(GNS1/SUR4 family)                                                 |
| Supercontig_1.15_MV<br>LG_02054_7sp   | -1049,0554 | -1048,9485 | 0,2138  | 0,10138 | NS | 0 | 0 | 0 | 0 | hypothetical protein              | PF05653.7  | DUF803(Protein of unknown<br>function (DUF803))                       |
| Supercontig_1.80_MV<br>LG_05637_8sp   | -1712,3932 | -1712,3932 | 0       | 0       | NS | 0 | 0 | 0 | 0 | hypothetical protein              | PF03208.12 | PRA1(PRA1 family protein)                                             |
| Supercontig_1.28_MV<br>LG_03154_11sp  | -704,29625 | -704,29625 | 0       | 0       | NS | 0 | 0 | 0 | 0 | hypothetical protein              | PF01189.10 | Nol1_Nop2_Fmu(NOL1/NOP2/s<br>un family)                               |
| Supercontig_1.14_MV<br>LG_02042_9sp   | -683,20347 | -683,20347 | 0       | 0       | NS | 0 | 0 | 0 | 0 | hypothetical protein              | PF00012.13 | HSP70(Hsp70 protein)                                                  |
| Supercontig_1.69_MV<br>LG_05302_9sp   | -523,06232 | -523,06232 | 0       | 0       | NS | 0 | 0 | 0 | 0 | hypothetical protein              | PF07716.8  | bZIP_2(Basic region leucine<br>zipper)                                |
| Supercontig_1.69_MV<br>LG_05298_10sp  | -2202,2269 | -2202,2269 | 0       | 0       | NS | 0 | 0 | 0 | 0 | hypothetical protein              | PF08302.4  | tRNA_lig_CPD(Fungal tRNA<br>ligase phosphodiesterase<br>domain)       |
| Supercontig_1.25_MV<br>LG_02956_11sp  | -674,05462 | -674,05462 | 0       | 0       | NS | 0 | 0 | 0 | 0 | hypothetical protein              | PF05158.5  | RNA_pol_Rpc34(RNA<br>polymerase Rpc34 subunit)                        |
| Supercontig_1.25_MV<br>LG_02938_12sp  | -401,94558 | -401,92133 | 0,0485  | 0,02396 | NS | 0 | 0 | 0 | 0 | hypothetical protein              | NA         | NA                                                                    |
| Supercontig_1.67_MV<br>LG_05200_6sp   | -1132,3958 | -1132,3958 | 0       | 0       | NS | 0 | 0 | 0 | 0 | hypothetical protein              | TIGR00727  | TIGR00727(ISP4_OPT: small<br>oligopeptide transporter, OPT<br>family) |
| Supercontig_1.2_MVL<br>G_00422_6sp    | -1121,8058 | -1121,8018 | 0,00794 | 0,00396 | NS | 0 | 0 | 0 | 0 | hypothetical protein              | PF04468.5  | PSP1(PSP1 C-terminal<br>conserved region)                             |
| Supercontig_1.100_MV<br>LG_06135_12sp | -392,4438  | -392,4438  | 0       | 0       | NS | 0 | 0 | 0 | 0 | hypothetical protein              | PF01302.18 | CAP_GLY(CAP-Gly domain)                                               |
| Supercontig_1.6_MVL<br>G_01081_6sp    | -937,37442 | -937,37442 | 0       | 0       | NS | 0 | 0 | 0 | 0 | hypothetical protein              | PF06283.4  | ThuA(Trehalose utilisation)                                           |
| Supercontig_1.116_MV<br>LG_06379_11sp | -777,71365 | -777,71365 | 0       | 0       | NS | 0 | 0 | 0 | 0 | hypothetical protein              | PF03328.7  | HpcH_Hpal(HpcH/Hpal<br>aldolase/citrate lyase family)                 |
| Supercontig_1.3_MVL<br>G_00492_9sp    | -576,07467 | -575,36115 | 1,42704 | 0,51008 | NS | 0 | 0 | 0 | 0 | hypothetical protein              | PF08242.5  | Methyltransf_12(Methyltransferase<br>domain)                          |
| Supercontig_1.30_MV<br>LG_03307_12sp  | -627,29596 | -627,29595 | 0,00016 | 0,00016 | NS | 0 | 0 | 0 | 0 | hypothetical protein              | TIGR00756  | TIGR00756(PPR:<br>pentatricopeptide repeat domain)                    |
| Supercontig_1.47_MV<br>LG_04327_10sp  | -481,23231 | -480,38278 | 1,69906 | 0,57238 | NS | 0 | 0 | 0 | 0 | hypothetical protein              | PF01545.14 | Cation_efflux(Cation efflux<br>family)                                |
| Supercontig_1.24_MV<br>LG_02830_11sp  | -569,37876 | -566,36087 | 6,03578 | 0,9511  | ** | 0 | 0 | 0 | 0 | hypothetical protein              | PF03770.9  | IPK(Inositol polyphosphate<br>kinase)                                 |
| Supercontig_1.7_MVL<br>G_01334_9sp    | -452,27369 | -451,79279 | 0,9618  | 0,38177 | NS | 0 | 0 | 0 | 0 | hypothetical protein              | PF05057.7  | DUF676(Putative serine<br>esterase (DUF676))                          |

|                                       |            |            |         |         |    |   |   |   |   |   |                                                                     |            |                                                                                        |
|---------------------------------------|------------|------------|---------|---------|----|---|---|---|---|---|---------------------------------------------------------------------|------------|----------------------------------------------------------------------------------------|
| Supercontig_1.57_MV<br>LG_04835_10sp  | -473,30024 | -473,29981 | 0,00086 | 0,00043 | NS | 0 | □ | □ | □ | □ | ubiquitin-activating<br>enzyme E1 C                                 | PF10585.2  | UBA_e1_thiolCys(Ubiquitin-<br>activating enzyme active site)                           |
| Supercontig_1.47_MV<br>LG_04340_8sp   | -657,61757 | -657,61757 | 0       | 0       | NS | 0 | □ | □ | □ | □ | guanine nucleotide-<br>binding protein subunit<br>beta-like protein | PF00400.25 | WD40(WD domain, G-beta<br>repeat)                                                      |
| Supercontig_1.30_MV<br>LG_03316_12sp  | -597,60283 | -597,60283 | 0       | 0       | NS | 0 | □ | □ | □ | □ | hypothetical protein                                                | NA         | NA                                                                                     |
| Supercontig_1.12_MV<br>LG_01826_11sp  | -494,33817 | -493,64085 | 1,39464 | 0,50208 | NS | 0 | □ | □ | □ | □ | hypothetical protein                                                | PF00664.16 | ABC_membrane(ABC<br>transporter transmembrane<br>region)                               |
| Supercontig_1.15_MV<br>LG_02065_7sp   | -370,69047 | -370,69037 | 0,0002  | 0,00016 | NS | 0 | □ | □ | □ | □ | hypothetical protein                                                | TIGR00311  | TIGR00311(aIF-2beta: putative<br>translation initiation factor aIF-2,<br>beta subunit) |
| Supercontig_1.17_MV<br>LG_02267_7sp   | -1029,1285 | -1028,873  | 0,511   | 0,22547 | NS | 0 | □ | □ | □ | □ | hypothetical protein                                                | PF10516.2  | SHNi-TPR(SHNi-TPR)                                                                     |
| Supercontig_1.116_MV<br>LG_06383_6sp  | -386,02639 | -384,35413 | 3,34452 | 0,81218 | NS | 0 | □ | □ | □ | □ | hypothetical protein                                                | NA         | NA                                                                                     |
| Supercontig_1.3_MVL<br>G_00565_11sp   | -834,83509 | -834,83509 | 0       | 0       | NS | 0 | □ | □ | □ | □ | hypothetical protein                                                | PF00400.25 | WD40(WD domain, G-beta<br>repeat)                                                      |
| Supercontig_1.24_MV<br>LG_02890_9sp   | -732,46988 | -731,36849 | 2,20278 | 0,66759 | NS | 0 | □ | □ | □ | □ | hypothetical protein                                                | NA         | NA                                                                                     |
| Supercontig_1.140_MV<br>LG_06673_10sp | -501,98056 | -501,43884 | 1,08344 | 0,41825 | NS | 0 | □ | □ | □ | □ | hypothetical protein                                                | PF08561.3  | Ribosomal_L37(Mitochondrial<br>ribosomal protein L37)                                  |
| Supercontig_1.7_MVL<br>G_01323_7sp    | -559,13637 | -559,00324 | 0,26626 | 0,12465 | NS | 0 | □ | □ | □ | □ | hypothetical protein                                                | NA         | NA                                                                                     |
| Supercontig_1.24_MV<br>LG_02839_10sp  | -520,94159 | -520,94149 | 0,0002  | 0,00016 | NS | 0 | □ | □ | □ | □ | hypothetical protein                                                | PF00787.17 | PX(PX domain)                                                                          |
| Supercontig_1.44_MV<br>LG_04139_8sp   | -1329,5478 | -1329,4655 | 0,16478 | 0,07909 | NS | 0 | □ | □ | □ | □ | hypothetical protein                                                | NA         | NA                                                                                     |
| Supercontig_1.140_MV<br>LG_06686_9sp  | -463,55447 | -463,55447 | 0       | 0       | NS | 0 | □ | □ | □ | □ | hypothetical protein                                                | PF00400.25 | WD40(WD domain, G-beta<br>repeat)                                                      |
| Supercontig_1.41_MV<br>LG_04009_8sp   | -473,75272 | -473,75272 | 0       | 0       | NS | 0 | □ | □ | □ | □ | hypothetical protein                                                | NA         | NA                                                                                     |
| Supercontig_1.65_MV<br>LG_05138_9sp   | -1189,7114 | -1189,7114 | 0       | 0       | NS | 0 | □ | □ | □ | □ | hypothetical protein                                                | NA         | NA                                                                                     |
| Supercontig_1.54_MV<br>LG_04691_10sp  | -570,87079 | -570,15379 | 1,434   | 0,51179 | NS | 0 | □ | □ | □ | □ | hypothetical protein                                                | NA         | NA                                                                                     |
| Supercontig_1.22_MV<br>LG_02743_8sp   | -472,32878 | -472,32873 | 0,00016 | 0,00016 | NS | 0 | □ | □ | □ | □ | NADH dehydrogenase<br>(ubiquinone) 1 alpha<br>subcomplex 9          | PF07993.5  | NAD_binding_4(Male sterility<br>protein)                                               |
| Supercontig_1.8_MVL<br>G_01467_7sp    | -472,51515 | -472,51515 | 0       | 0       | NS | 0 | □ | □ | □ | □ | hypothetical protein                                                | PF11969.1  | DcpS_C(Scavenger mRNA<br>decapping enzyme C-term<br>binding)                           |
| Supercontig_1.4_MVL<br>G_00759_6sp    | -744,92639 | -744,60166 | 0,64946 | 0,27728 | NS | 0 | □ | □ | □ | □ | hypothetical protein                                                | NA         | NA                                                                                     |
| Supercontig_1.100_MV<br>LG_06141_9sp  | -467,51571 | -467,51571 | 0       | 0       | NS | 0 | □ | □ | □ | □ | hypothetical protein                                                | NA         | NA                                                                                     |
| Supercontig_1.9_MVL<br>G_01566_6sp    | -738,73269 | -738,15259 | 1,1602  | 0,44016 | NS | 0 | □ | □ | □ | □ | adenosine deaminase                                                 | PF00962.15 | A_deaminase(Adenosine/AMP<br>deaminase)                                                |

|                                      |            |            |         |         |    |   |   |   |   |   |                                                |            |                                                                                    |
|--------------------------------------|------------|------------|---------|---------|----|---|---|---|---|---|------------------------------------------------|------------|------------------------------------------------------------------------------------|
| Supercontig_1.4_MVL<br>G_00789_9sp   | -1353,4301 | -1351,6072 | 3,64576 | 0,83844 | NS | 0 | □ | □ | □ | □ | hypothetical protein                           | NA         | NA                                                                                 |
| Supercontig_1.100_MV<br>LG_06136_9sp | -775,72877 | -775,59782 | 0,2619  | 0,12274 | NS | 0 | □ | □ | □ | □ | glutamate-cysteine<br>ligase catalytic subunit | PF03074.9  | GCS(Glutamate-cysteine ligase)                                                     |
| Supercontig_1.18_MV<br>LG_02422_10sp | -626,95539 | -626,92215 | 0,06648 | 0,03269 | NS | 0 | □ | □ | □ | □ | hypothetical protein                           | PF00171.15 | Aldedh(Aldehyde dehydrogenase<br>family)                                           |
| Supercontig_1.63_MV<br>LG_05051_8sp  | -841,3863  | -840,81582 | 1,14096 | 0,43475 | NS | 0 | □ | □ | □ | □ | GMP synthase                                   | PF03054.9  | tRNA_Me_trans(tRNA methyl<br>transferase)                                          |
| Supercontig_1.33_MV<br>LG_03479_8sp  | -1595,918  | -1592,8225 | 6,19104 | 0,95475 | ** | 0 | □ | □ | □ | □ | hypothetical protein                           | PF00067.15 | p450(Cytochrome P450)                                                              |
| Supercontig_1.52_MV<br>LG_04588_7sp  | -1034,1803 | -1034,1803 | 0       | 0       | NS | 0 | □ | □ | □ | □ | hypothetical protein                           | NA         | NA                                                                                 |
| Supercontig_1.31_MV<br>LG_03356_7sp  | -606,65658 | -605,44618 | 2,4208  | 0,70192 | NS | 0 | □ | □ | □ | □ | hypothetical protein                           | NA         | NA                                                                                 |
| Supercontig_1.70_MV<br>LG_05332_9sp  | -970,2785  | -968,65695 | 3,2431  | 0,80241 | NS | 0 | □ | □ | □ | □ | hypothetical protein                           | PF12612.1  | TFCD_C(Tubulin folding cofactor<br>D C terminal)                                   |
| Supercontig_1.8_MVL<br>G_01392_7sp   | -352,99418 | -352,9941  | 0,00016 | 0,00016 | NS | 0 | □ | □ | □ | □ | mandelate racemase                             | PF01188.14 | MR_MLE(Mandelate racemase /<br>muconate lactonizing enzyme, C-<br>terminal domain) |
| Supercontig_1.40_MV<br>LG_03966_9sp  | -377,82339 | -377,82339 | 0       | 0       | NS | 0 | □ | □ | □ | □ | hypothetical protein                           | NA         | NA                                                                                 |
| Supercontig_1.41_MV<br>LG_03978_8sp  | -608,29709 | -608,29709 | 0       | 0       | NS | 0 | □ | □ | □ | □ | hypothetical protein                           | PF03985.6  | Paf1(Paf1)                                                                         |
| Supercontig_1.2_MVL<br>G_00409_7sp   | -567,60217 | -567,22735 | 0,74964 | 0,31259 | NS | 0 | □ | □ | □ | □ | hypothetical protein                           | PF07876.5  | Dabb(Stress responsive A/B<br>Barrel Domain)                                       |
| Supercontig_1.19_MV<br>LG_02467_6sp  | -937,25627 | -937,25627 | 0       | 0       | NS | 0 | □ | □ | □ | □ | hypothetical protein                           | PF05786.7  | Barren(Barren protein)                                                             |
| Supercontig_1.1_MVL<br>G_00196_6sp   | -480,01781 | -480,01764 | 0,00034 | 0,00017 | NS | 0 | □ | □ | □ | □ | hypothetical protein                           | PF11176.1  | DUF2962(Protein of unknown<br>function (DUF2962))                                  |
| Supercontig_1.8_MVL<br>G_01370_11sp  | -450,78925 | -450,78924 | 0,00016 | 0,00016 | NS | 0 | □ | □ | □ | □ | hypothetical protein                           | PF02517.9  | Abi(CAAX amino terminal<br>protease family)                                        |
| Supercontig_1.2_MVL<br>G_00328_9sp   | -613,58817 | -613,58817 | 0       | 0       | NS | 0 | □ | □ | □ | □ | hypothetical protein                           | PF08616.3  | SPB_interacting(Spindle pole<br>body interacting protein)                          |
| Supercontig_1.38_MV<br>LG_03771_9sp  | -436,20398 | -436,20398 | 0       | 0       | NS | 0 | □ | □ | □ | □ | hypothetical protein                           | NA         | NA                                                                                 |
| Supercontig_1.15_MV<br>LG_02092_8sp  | -730,3955  | -730,3955  | 0       | 0       | NS | 0 | □ | □ | □ | □ | hypothetical protein                           | PF00702.19 | Hydrolase(haloacid<br>dehalogenase-like hydrolase)                                 |
| Supercontig_1.123_MV<br>LG_06470_9sp | -1134,2565 | -1133,9376 | 0,63774 | 0,27303 | NS | 0 | □ | □ | □ | □ | hypothetical protein                           | PF00172.11 | Zn_clus(Fungal Zn(2)-Cys(6)<br>binuclear cluster domain)                           |
| Supercontig_1.83_MV<br>LG_05729_10sp | -570,50342 | -570,50328 | 0,00028 | 0,00014 | NS | 0 | □ | □ | □ | □ | hypothetical protein                           | NA         | NA                                                                                 |
| Supercontig_1.9_MVL<br>G_01570_6sp   | -310,79887 | -309,63037 | 2,337   | 0,68917 | NS | 0 | □ | □ | □ | □ | ATP-dependent RNA<br>helicase DBP5             | PF00270.22 | DEAD(DEAD/DEAH box<br>helicase)                                                    |
| Supercontig_1.154_MV<br>LG_06805_9sp | -372,81792 | -372,47721 | 0,68142 | 0,28873 | NS | 0 | □ | □ | □ | □ | hypothetical protein                           | PF00179.19 | UQ_con(Ubiquitin-conjugating<br>enzyme)                                            |
| Supercontig_1.110_MV<br>LG_06297_7sp | -620,6568  | -620,6568  | 0       | 0       | NS | 0 | □ | □ | □ | □ | hypothetical protein                           | PF01590.19 | GAF(GAF domain)                                                                    |
| Supercontig_1.13_MV<br>LG_01972_7sp  | -1708,4391 | -1708,4148 | 0,04854 | 0,02398 | NS | 0 | □ | □ | □ | □ | hypothetical protein                           | PF00179.19 | UQ_con(Ubiquitin-conjugating<br>enzyme)                                            |
| Supercontig_1.47_MV<br>LG_04343_9sp  | -638,90291 | -637,76191 | 2,282   | 0,6805  | NS | 0 | □ | □ | □ | □ | non-B type DNA<br>binding protein              | PF00505.12 | HMG_box(HMG (high mobility<br>group) box)                                          |

|                                      |            |            |         |         |    |   |   |   |   |   |   |   |   |   |                                            |            |                                                                                  |
|--------------------------------------|------------|------------|---------|---------|----|---|---|---|---|---|---|---|---|---|--------------------------------------------|------------|----------------------------------------------------------------------------------|
| Supercontig_1.96_MV<br>LG_06038_9sp  | -760,70628 | -760,70582 | 0,00092 | 0,00046 | NS | 0 | 0 | 0 | 0 | 0 | 0 | 0 | 0 | 0 | hypothetical protein                       | PF01315.15 | Ald_Xan_dh_C(Aldehyde oxidase and xanthine dehydrogenase, a/b hammerhead domain) |
| Supercontig_1.3_MVL<br>G_00587_10sp  | -411,14949 | -410,53281 | 1,23336 | 0,46027 | NS | 0 | 0 | 0 | 0 | 0 | 0 | 0 | 0 | 0 | hypothetical protein                       | PF04153.11 | NOT2_3_5(NOT2 / NOT3 / NOT5 family)                                              |
| Supercontig_1.18_MV<br>LG_02348_10sp | -516,60252 | -516,30306 | 0,59892 | 0,25878 | NS | 0 | 0 | 0 | 0 | 0 | 0 | 0 | 0 | 0 | hypothetical protein                       | PF01062.14 | Bestrophin(Bestrophin)                                                           |
| Supercontig_1.97_MV<br>LG_06070_6sp  | -570,96796 | -570,96779 | 0,00034 | 0,00017 | NS | 0 | 0 | 0 | 0 | 0 | 0 | 0 | 0 | 0 | hypothetical protein                       | NA         | NA                                                                               |
| Supercontig_1.10_MV<br>LG_01612_10sp | -725,34699 | -725,34699 | 0       | 0       | NS | 0 | 0 | 0 | 0 | 0 | 0 | 0 | 0 | 0 | hypothetical protein                       | PF02714.8  | DUF221(Domain of unknown function DUF221)                                        |
| Supercontig_1.74_MV<br>LG_05471_10sp | -580,26231 | -580,26231 | 0       | 0       | NS | 0 | 0 | 0 | 0 | 0 | 0 | 0 | 0 | 0 | hypothetical protein                       | NA         | NA                                                                               |
| Supercontig_1.6_MVL<br>G_01109_10sp  | -329,94919 | -329,95086 | 0       | 0       | NS | 0 | 0 | 0 | 0 | 0 | 0 | 0 | 0 | 0 | hypothetical protein                       | PF02201.11 | SWIB(SWIB/MDM2 domain)                                                           |
| Supercontig_1.45_MV<br>LG_04234_9sp  | -808,8999  | -808,8999  | 0       | 0       | NS | 0 | 0 | 0 | 0 | 0 | 0 | 0 | 0 | 0 | hypothetical protein                       | PF00005.20 | ABC_tran(ABC transporter)                                                        |
| Supercontig_1.12_MV<br>LG_01834_7sp  | -487,16073 | -487,16058 | 0,0003  | 0,00015 | NS | 0 | 0 | 0 | 0 | 0 | 0 | 0 | 0 | 0 | hypothetical protein                       | PF00248.14 | Aldo_ket_red(Aldo/keto reductase family)                                         |
| Supercontig_1.35_MV<br>LG_03591_7sp  | -471,53874 | -471,5387  | 0,00016 | 0,00016 | NS | 0 | 0 | 0 | 0 | 0 | 0 | 0 | 0 | 0 | mitochondrial DNA replication protein YHM2 | PF00153.20 | Mito_carr(Mitochondrial carrier protein)                                         |
| Supercontig_1.5_MVL<br>G_00998_10sp  | -349,28594 | -349,28553 | 0,00082 | 0,00041 | NS | 0 | 0 | 0 | 0 | 0 | 0 | 0 | 0 | 0 | hypothetical protein                       | PF08154.5  | NLE(NLE (NUC135) domain)                                                         |
| Supercontig_1.34_MV<br>LG_03521_10sp | -990,87851 | -990,61067 | 0,53568 | 0,23497 | NS | 0 | 0 | 0 | 0 | 0 | 0 | 0 | 0 | 0 | hypothetical protein                       | NA         | NA                                                                               |
| Supercontig_1.31_MV<br>LG_03379_8sp  | -611,46532 | -611,46532 | 0       | 0       | NS | 0 | 0 | 0 | 0 | 0 | 0 | 0 | 0 | 0 | hypothetical protein                       | NA         | NA                                                                               |
| Supercontig_1.36_MV<br>LG_03665_8sp  | -648,21522 | -647,22847 | 1,9735  | 0,62721 | NS | 0 | 0 | 0 | 0 | 0 | 0 | 0 | 0 | 0 | hypothetical protein                       | NA         | NA                                                                               |
| Supercontig_1.5_MVL<br>G_00986_11sp  | -394,90005 | -394,90005 | 0       | 0       | NS | 0 | 0 | 0 | 0 | 0 | 0 | 0 | 0 | 0 | hypothetical protein                       | NA         | NA                                                                               |
| Supercontig_1.107_MV<br>LG_06246_7sp | -793,76349 | -793,37574 | 0,7755  | 0,32142 | NS | 0 | 0 | 0 | 0 | 0 | 0 | 0 | 0 | 0 | hypothetical protein                       | PF00091.18 | Tubulin(Tubulin/FtsZ family, GTPase domain)                                      |
| Supercontig_1.11_MV<br>LG_01718_9sp  | -532,32265 | -532,32265 | 0       | 0       | NS | 0 | 0 | 0 | 0 | 0 | 0 | 0 | 0 | 0 | hypothetical protein                       | PF10394.2  | Hat1_N(Histone acetyl transferase HAT1 N-terminus)                               |
| Supercontig_1.5_MVL<br>G_00994_10sp  | -410,23788 | -409,14445 | 2,18686 | 0,66493 | NS | 0 | 0 | 0 | 0 | 0 | 0 | 0 | 0 | 0 | hypothetical protein                       | PF11969.1  | DcpS_C(Scavenger mRNA decapping enzyme C-term binding)                           |
| Supercontig_1.59_MV<br>LG_04919_11sp | -1304,7227 | -1304,0226 | 1,4001  | 0,50344 | NS | 0 | 0 | 0 | 0 | 0 | 0 | 0 | 0 | 0 | hypothetical protein                       | PF06371.6  | Drf_GBD(Diaphanous GTPase-binding Domain)                                        |
| Supercontig_1.27_MV<br>LG_03092_9sp  | -540,85451 | -539,67348 | 2,36206 | 0,69304 | NS | 0 | 0 | 0 | 0 | 0 | 0 | 0 | 0 | 0 | hypothetical protein                       | PF07732.8  | Cu-oxidase_3(Multicopper oxidase)                                                |
| Supercontig_1.28_MV<br>LG_03206_6sp  | -1208,3777 | -1208,3002 | 0,15504 | 0,07459 | NS | 0 | 0 | 0 | 0 | 0 | 0 | 0 | 0 | 0 | hypothetical protein                       | PF08320.5  | PIG-X(PIG-X / PBN1)                                                              |
| Supercontig_1.97_MV<br>LG_06073_7sp  | -373,38114 | -373,38111 | 0,00016 | 0,00016 | NS | 0 | 0 | 0 | 0 | 0 | 0 | 0 | 0 | 0 | U6 snRNA-associated Sm-like protein LSM3   | PF01423.15 | LSM(LSM domain)                                                                  |
| Supercontig_1.47_MV<br>LG_04314_10sp | -750,32337 | -750,32337 | 0       | 0       | NS | 0 | 0 | 0 | 0 | 0 | 0 | 0 | 0 | 0 | hypothetical protein                       | PF01265.10 | Cyto_heme_lyase(Cytochrome c/c1 heme lyase)                                      |

|                                       |            |            |         |         |    |   |  |  |  |                                                              |            |                                                                         |
|---------------------------------------|------------|------------|---------|---------|----|---|--|--|--|--------------------------------------------------------------|------------|-------------------------------------------------------------------------|
| Supercontig_1.175_MV<br>LG_06975_7sp  | -369,79502 | -367,43569 | 4,71866 | 0,90552 | *  | 0 |  |  |  | hypothetical protein                                         | NA         | NA                                                                      |
| Supercontig_1.46_MV<br>LG_04287_10sp  | -654,12321 | -654,12321 | 0       | 0       | NS | 0 |  |  |  | hypothetical protein                                         | NA         | NA                                                                      |
| Supercontig_1.24_MV<br>LG_02857_7sp   | -1224,2745 | -1224,1641 | 0,22092 | 0,10458 | NS | 0 |  |  |  | HAL protein kinase                                           | PF07714.10 | Pkinase_Tyr(Protein tyrosine kinase)                                    |
| Supercontig_1.61_MV<br>LG_04979_9sp   | -1135,1171 | -1135,1171 | 0       | 0       | NS | 0 |  |  |  | hypothetical protein                                         | NA         | NA                                                                      |
| Supercontig_1.1_MVL<br>G_00236_6sp    | -647,55381 | -647,55381 | 0       | 0       | NS | 0 |  |  |  | hypothetical protein                                         | PF07690.9  | MFS_1(Major Facilitator Superfamily)                                    |
| Supercontig_1.6_MVL<br>G_01080_6sp    | -667,61708 | -667,61708 | 0       | 0       | NS | 0 |  |  |  | hypothetical protein                                         | NA         | NA                                                                      |
| Supercontig_1.109_MV<br>LG_06282_10sp | -486,70323 | -486,25374 | 0,89898 | 0,36205 | NS | 0 |  |  |  | hypothetical protein                                         | PF00097.18 | zf-C3HC4(Zinc finger, C3HC4 type (RING finger))                         |
| Supercontig_1.4_MVL<br>G_00860_8sp    | -1128,9969 | -1128,8754 | 0,24294 | 0,11438 | NS | 0 |  |  |  | hypothetical protein                                         | PF07019.5  | Rab5ip(Rab5-interacting protein (Rab5ip))                               |
| Supercontig_1.23_MV<br>LG_02803_10sp  | -1260,8758 | -1260,5796 | 0,59238 | 0,25635 | NS | 0 |  |  |  | hypothetical protein                                         | PF01412.11 | ArfGap(Putative GTPase activating protein for Arf)                      |
| Supercontig_1.6_MVL<br>G_01174_11sp   | -488,55918 | -488,55914 | 0,00016 | 0,00016 | NS | 0 |  |  |  | hypothetical protein                                         | PF09612.3  | HtrL_YibB(Bacterial protein of unknown function (HtrL_YibB))            |
| Supercontig_1.10_MV<br>LG_01641_7sp   | -748,5231  | -748,37987 | 0,28646 | 0,13345 | NS | 0 |  |  |  | hypothetical protein                                         | NA         | NA                                                                      |
| Supercontig_1.25_MV<br>LG_02961_7sp   | -1309,6828 | -1306,7504 | 5,86466 | 0,94673 | *  | 0 |  |  |  | hypothetical protein                                         | NA         | NA                                                                      |
| Supercontig_1.41_MV<br>LG_04007_7sp   | -449,18862 | -449,1885  | 0,00024 | 0,00012 | NS | 0 |  |  |  | hypothetical protein                                         | PF04851.8  | ResIII(Type III restriction enzyme, res subunit)                        |
| Supercontig_1.19_MV<br>LG_02504_8sp   | -503,08648 | -503,08618 | 0,0006  | 0,0003  | NS | 0 |  |  |  | 40S ribosomal protein S13                                    | PF08069.5  | Ribosomal_S13_N(Ribosomal S13/S15 N-terminal domain)                    |
| Supercontig_1.42_MV<br>LG_04062_9sp   | -345,66614 | -345,66582 | 0,00064 | 0,00032 | NS | 0 |  |  |  | PLK/PLK1 protein kinase                                      | PF07714.10 | Pkinase_Tyr(Protein tyrosine kinase)                                    |
| Supercontig_1.13_MV<br>LG_01933_9sp   | -420,01809 | -420,01795 | 0,00028 | 0,00014 | NS | 0 |  |  |  | hypothetical protein                                         | PF00557.17 | Peptidase_M24(Metallopeptidase family M24)                              |
| Supercontig_1.1_MVL<br>G_00097_7sp    | -426,77021 | -426,68554 | 0,16934 | 0,08118 | NS | 0 |  |  |  | hypothetical protein                                         | PF01757.15 | Acyl_transf_3(Acyltransferase family)                                   |
| Supercontig_1.95_MV<br>LG_06026_8sp   | -363,70831 | -363,70831 | 0       | 0       | NS | 0 |  |  |  | hypothetical protein                                         | PF02391.10 | MoaE(MoaE protein)                                                      |
| Supercontig_1.61_MV<br>LG_04993_10sp  | -741,29179 | -741,29179 | 0       | 0       | NS | 0 |  |  |  | hypothetical protein                                         | PF10637.2  | Ofd1_CTDD(Oxoglutarate and iron-dependent oxygenase degradation C-term) |
| Supercontig_1.55_MV<br>LG_04730_6sp   | -1819,0801 | -1817,6272 | 2,90564 | 0,76609 | NS | 0 |  |  |  | hypothetical protein                                         | PF10033.2  | ATG13(Autophagy-related protein 13)                                     |
| Supercontig_1.10_MV<br>LG_01681_6sp   | -312,89717 | -312,86766 | 0,05902 | 0,02908 | NS | 0 |  |  |  | mitochondrial import inner membrane translocase subunit Tim9 | PF02953.8  | zf-Tim10_DDP(Tim10/DDP family zinc finger)                              |
| Supercontig_1.107_MV<br>LG_06254_7sp  | -626,9354  | -626,9354  | 0       | 0       | NS | 0 |  |  |  | peptidyl-prolyl cis-trans isomerase                          | PF00160.14 | Pro_isomerase(Cyclophilin type peptidyl-prolyl cis-trans isomerase/CLD) |
| Supercontig_1.6_MVL<br>G_01110_8sp    | -1353,1946 | -1352,377  | 1,6352  | 0,55851 | NS | 0 |  |  |  | hypothetical protein                                         | NA         | NA                                                                      |







|                                      |            |            |         |         |    |   |  |  |  |  |                                    |            |                                                             |
|--------------------------------------|------------|------------|---------|---------|----|---|--|--|--|--|------------------------------------|------------|-------------------------------------------------------------|
| Supercontig_1.65_MV<br>LG_05146_10sp | -1576,0574 | -1576,0574 | 0       | 0       | NS | 0 |  |  |  |  | hypothetical protein               | PF01231.11 | IDO(Indoleamine 2,3-dioxygenase)                            |
| Supercontig_1.17_MV<br>LG_02338_8sp  | -705,92606 | -705,92602 | 0,00016 | 0,00016 | NS | 0 |  |  |  |  | hypothetical protein               | PF00664.16 | ABC_membrane(ABC transporter transmembrane region)          |
| Supercontig_1.8_MVL<br>G_01435_11sp  | -538,57744 | -538,57744 | 0       | 0       | NS | 0 |  |  |  |  | hypothetical protein               | NA         | NA                                                          |
| Supercontig_1.20_MV<br>LG_02551_10sp | -463,76476 | -462,61887 | 2,29178 | 0,68206 | NS | 0 |  |  |  |  | hypothetical protein               | NA         | NA                                                          |
| Supercontig_1.6_MVL<br>G_01217_9sp   | -910,00249 | -909,72159 | 0,5618  | 0,2449  | NS | 0 |  |  |  |  | hypothetical protein               | NA         | NA                                                          |
| Supercontig_1.1_MVL<br>G_00208_7sp   | -568,62973 | -568,62766 | 0,00414 | 0,00207 | NS | 0 |  |  |  |  | histone H1                         | PF00538.12 | Linker_histone(linker histone H1 and H5 family)             |
| Supercontig_1.22_MV<br>LG_02735_9sp  | -394,50212 | -394,49735 | 0,00954 | 0,00476 | NS | 0 |  |  |  |  | hypothetical protein               | NA         | NA                                                          |
| Supercontig_1.68_MV<br>LG_05246_10sp | -527,67601 | -527,676   | 0,00016 | 0,00016 | NS | 0 |  |  |  |  | hypothetical protein               | PF01805.13 | Surp(Surp module)                                           |
| Supercontig_1.45_MV<br>LG_04221_8sp  | -919,93675 | -919,93675 | 0,00016 | 0,00016 | NS | 0 |  |  |  |  | hypothetical protein               | PF09783.2  | Vac_ImportDeg(Vacuolar import and degradation protein)      |
| Supercontig_1.75_MV<br>LG_05504_9sp  | -737,90572 | -737,90572 | 0,00016 | 0,00016 | NS | 0 |  |  |  |  | CDC7 protein kinase                | PF07714.10 | Pkinase_Tyr(Protein tyrosine kinase)                        |
| Supercontig_1.4_MVL<br>G_00838_6sp   | -639,60089 | -639,60085 | 0,00016 | 0,00016 | NS | 0 |  |  |  |  | hypothetical protein               | NA         | NA                                                          |
| Supercontig_1.66_MV<br>LG_05175_11sp | -503,64852 | -502,81818 | 1,66068 | 0,5641  | NS | 0 |  |  |  |  | hypothetical protein               | NA         | NA                                                          |
| Supercontig_1.95_MV<br>LG_06017_11sp | -582,56874 | -581,54029 | 2,0569  | 0,64244 | NS | 0 |  |  |  |  | hypothetical protein               | PF04851.8  | ResIII(Type III restriction enzyme, res subunit)            |
| Supercontig_1.27_MV<br>LG_03109_9sp  | -548,47663 | -548,4607  | 0,03186 | 0,0158  | NS | 0 |  |  |  |  | hypothetical protein               | PF04303.6  | PrpF(PrpF protein)                                          |
| Supercontig_1.61_MV<br>LG_04984_11sp | -398,95837 | -398,95837 | 0       | 0       | NS | 0 |  |  |  |  | hypothetical protein               | PF07690.9  | MFS_1(Major Facilitator Superfamily)                        |
| Supercontig_1.4_MVL<br>G_00738_9sp   | -450,09814 | -450,0806  | 0,03508 | 0,01739 | NS | 0 |  |  |  |  | hypothetical protein               | TIGR00756  | TIGR00756(PPR: pentatricopeptide repeat domain)             |
| Supercontig_1.21_MV<br>LG_02633_10sp | -636,22434 | -636,01855 | 0,41158 | 0,186   | NS | 0 |  |  |  |  | hypothetical protein               | PF00787.17 | PX(PX domain)                                               |
| Supercontig_1.8_MVL<br>G_01425_8sp   | -803,95998 | -803,95966 | 0,00064 | 0,00032 | NS | 0 |  |  |  |  | hypothetical protein               | PF00664.16 | ABC_membrane(ABC transporter transmembrane region)          |
| Supercontig_1.80_MV<br>LG_05633_11sp | -563,58764 | -563,58764 | 0       | 0       | NS | 0 |  |  |  |  | hypothetical protein               | NA         | NA                                                          |
| Supercontig_1.125_MV<br>LG_06507_6sp | -369,06902 | -369,06871 | 0,00062 | 0,00031 | NS | 0 |  |  |  |  | 60S ribosomal protein L10          | PF00252.11 | Ribosomal_L16(Ribosomal protein L16p/L10e)                  |
| Supercontig_1.70_MV<br>LG_05334_9sp  | -289,55568 | -289,55535 | 0,00066 | 0,00033 | NS | 0 |  |  |  |  | glycerol-3-phosphate dehydrogenase | PF00890.17 | FAD_binding_2(FAD binding domain)                           |
| Supercontig_1.48_MV<br>LG_04398_10sp | -753,95953 | -753,95895 | 0,00116 | 0,00058 | NS | 0 |  |  |  |  | hypothetical protein               | PF00536.23 | SAM_1(SAM domain (Sterile alpha motif))                     |
| Supercontig_1.20_MV<br>LG_02604_9sp  | -511,89598 | -511,89583 | 0,0003  | 0,00015 | NS | 0 |  |  |  |  | citrate synthase                   | TIGR01793  | TIGR01793(cit_synth_euk: citrate (Si)-synthase, eukaryotic) |

|                                       |            |            |         |         |    |   |  |  |  |                                          |            |                                                                               |
|---------------------------------------|------------|------------|---------|---------|----|---|--|--|--|------------------------------------------|------------|-------------------------------------------------------------------------------|
| Supercontig_1.2_MVL<br>G_00477_6sp    | -1106,67   | -1106,5102 | 0,31974 | 0,14775 | NS | 0 |  |  |  | hypothetical protein                     | NA         | NA                                                                            |
| Supercontig_1.105_MV<br>LG_06222_9sp  | -608,77118 | -607,07359 | 3,39518 | 0,81688 | NS | 0 |  |  |  | hypothetical protein                     | PF00561.13 | Abhydrolase_1(alpha/beta<br>hydrolase fold)                                   |
| Supercontig_1.4_MVL<br>G_00778_10sp   | -382,26328 | -382,26328 | 0       | 0       | NS | 0 |  |  |  | hypothetical protein                     | NA         | NA                                                                            |
| Supercontig_1.35_MV<br>LG_03605_10sp  | -876,09842 | -874,93521 | 2,32642 | 0,68752 | NS | 0 |  |  |  | hypothetical protein                     | NA         | NA                                                                            |
| Supercontig_1.55_MV<br>LG_04746_9sp   | -550,64836 | -550,64836 | 0       | 0       | NS | 0 |  |  |  | hypothetical protein                     | NA         | NA                                                                            |
| Supercontig_1.176_MV<br>LG_06978_10sp | -754,72487 | -754,72487 | 0       | 0       | NS | 0 |  |  |  | hypothetical protein                     | PF01266.17 | DAO(FAD dependent<br>oxidoreductase)                                          |
| Supercontig_1.48_MV<br>LG_04360_6sp   | -370,02528 | -370,02517 | 0,00022 | 0,00011 | NS | 0 |  |  |  | hypothetical protein                     | NA         | NA                                                                            |
| Supercontig_1.50_MV<br>LG_04485_8sp   | -877,0158  | -877,0158  | 0       | 0       | NS | 0 |  |  |  | hypothetical protein                     | PF03124.7  | EXS(EXS family)                                                               |
| Supercontig_1.155_MV<br>LG_06823_12sp | -319,58665 | -319,58635 | 0,0006  | 0,0003  | NS | 0 |  |  |  | hypothetical protein                     | PF02170.15 | PAZ(PAZ domain)                                                               |
| Supercontig_1.5_MVL<br>G_00897_9sp    | -867,21329 | -867,16968 | 0,08722 | 0,04267 | NS | 0 |  |  |  | hypothetical protein                     | NA         | NA                                                                            |
| Supercontig_1.40_MV<br>LG_03964_6sp   | -551,33393 | -551,33393 | 0       | 0       | NS | 0 |  |  |  | hypothetical protein                     | PF03367.6  | zf-ZPR1(ZPR1 zinc-finger<br>domain)                                           |
| Supercontig_1.82_MV<br>LG_05702_7sp   | -874,33178 | -874,06464 | 0,53428 | 0,23443 | NS | 0 |  |  |  | hypothetical protein                     | NA         | NA                                                                            |
| Supercontig_1.40_MV<br>LG_03906_6sp   | -804,06878 | -802,23785 | 3,66186 | 0,83974 | NS | 0 |  |  |  | hypothetical protein                     | NA         | NA                                                                            |
| Supercontig_1.11_MV<br>LG_01699_12sp  | -578,96016 | -578,96002 | 0,00028 | 0,00014 | NS | 0 |  |  |  | hypothetical protein                     | PF03357.14 | Snf7(Snf7)                                                                    |
| Supercontig_1.30_MV<br>LG_03289_8sp   | -1472,394  | -1469,654  | 5,47998 | 0,93543 | *  | 0 |  |  |  | hypothetical protein                     | PF06046.6  | Sec6(Exocyst complex<br>component Sec6)                                       |
| Supercontig_1.22_MV<br>LG_02751_7sp   | -720,36181 | -720,36181 | 0       | 0       | NS | 0 |  |  |  | hypothetical protein                     | NA         | NA                                                                            |
| Supercontig_1.31_MV<br>LG_03355_9sp   | -788,99959 | -788,88509 | 0,229   | 0,10819 | NS | 0 |  |  |  | hypothetical protein                     | PF00953.14 | Glycos_transf_4(Glycosyl<br>transferase family 4)                             |
| Supercontig_1.40_MV<br>LG_03957_10sp  | -665,45153 | -665,45153 | 0       | 0       | NS | 0 |  |  |  | hypothetical protein                     | PF00076.15 | RRM_1(RNA recognition motif.<br>(a.k.a. RRM, RBD, or RNP<br>domain))          |
| Supercontig_1.24_MV<br>LG_02908_7sp   | -673,98248 | -673,89042 | 0,18412 | 0,08795 | NS | 0 |  |  |  | hypothetical protein                     | NA         | NA                                                                            |
| Supercontig_1.5_MVL<br>G_00933_9sp    | -872,68761 | -871,61843 | 2,13836 | 0,65671 | NS | 0 |  |  |  | hypothetical protein                     | PF03583.7  | LIP(Secretory lipase)                                                         |
| Supercontig_1.10_MV<br>LG_01642_8sp   | -906,1324  | -905,81513 | 0,63454 | 0,27187 | NS | 0 |  |  |  | hypothetical protein                     | NA         | NA                                                                            |
| Supercontig_1.27_MV<br>LG_03093_7sp   | -804,33598 | -804,33598 | 0       | 0       | NS | 0 |  |  |  | hypothetical protein                     | PF02207.13 | zf-UBR(Putative zinc finger in N-<br>recognin (UBR box))                      |
| Supercontig_1.47_MV<br>LG_04299_10sp  | -534,85065 | -534,85065 | 0       | 0       | NS | 0 |  |  |  | hypothetical protein                     | PF01214.11 | CK_II_beta(Casein kinase II<br>regulatory subunit)                            |
| Supercontig_1.40_MV<br>LG_03919_6sp   | -359,49564 | -359,49564 | 0       | 0       | NS | 0 |  |  |  | peptidyl-prolyl cis-trans<br>isomerase B | PF00160.14 | Pro_isomerase(Cyclophilin type<br>peptidyl-prolyl cis-trans<br>isomerase/CLD) |
| Supercontig_1.87_MV<br>LG_05845_8sp   | -466,3994  | -466,3992  | 0,0004  | 0,0002  | NS | 0 |  |  |  | hypothetical protein                     | PF00642.17 | zf-CCCH(Zinc finger C-x8-C-x5-<br>C-x3-H type (and similar))                  |

|                                       |            |            |         |         |    |   |  |  |  |  |                                   |            |                                                                                         |
|---------------------------------------|------------|------------|---------|---------|----|---|--|--|--|--|-----------------------------------|------------|-----------------------------------------------------------------------------------------|
| Supercontig_1.205_MV<br>LG_07112_11sp | -407,70954 | -405,66671 | 4,08566 | 0,87034 | NS | 0 |  |  |  |  | hypothetical protein              | PF08321.5  | PPP5(PPP5)                                                                              |
| Supercontig_1.66_MV<br>LG_05176_12sp  | -1708,2709 | -1708,0745 | 0,3928  | 0,17832 | NS | 0 |  |  |  |  | hypothetical protein              | PF00097.18 | zf-C3HC4(Zinc finger, C3HC4<br>type (RING finger))                                      |
| Supercontig_1.62_MV<br>LG_05008_11sp  | -611,41742 | -611,41378 | 0,00728 | 0,00363 | NS | 0 |  |  |  |  | hypothetical protein              | NA         | NA                                                                                      |
| Supercontig_1.85_MV<br>LG_05789_8sp   | -678,00538 | -677,8121  | 0,38656 | 0,17575 | NS | 0 |  |  |  |  | hypothetical protein              | PF01735.11 | PLA2_B(Lysophospholipase<br>catalytic domain)                                           |
| Supercontig_1.16_MV<br>LG_02254_12sp  | -607,19173 | -607,19173 | 0       | 0       | NS | 0 |  |  |  |  | hypothetical protein              | PF11521.1  | TFIIE-A_C-term(C-terminal<br>general transcription factor TFIIE<br>alpha)               |
| Supercontig_1.88_MV<br>LG_05878_8sp   | -753,46271 | -753,46265 | 0,00012 | 0,00016 | NS | 0 |  |  |  |  | hypothetical protein              | PF07250.4  | Glyoxal_oxid_N(Glyoxal oxidase<br>N-terminus)                                           |
| Supercontig_1.160_MV<br>LG_06856_9sp  | -873,82975 | -873,61047 | 0,43856 | 0,1969  | NS | 0 |  |  |  |  | hypothetical protein              | PF00773.12 | RNB(RNB domain)                                                                         |
| Supercontig_1.172_MV<br>LG_06948_7sp  | -697,95045 | -697,94553 | 0,00984 | 0,00491 | NS | 0 |  |  |  |  | hypothetical protein              | PF02268.9  | TFIIA_gamma_N(Transcription<br>initiation factor IIA, gamma<br>subunit, helical domain) |
| Supercontig_1.107_MV<br>LG_06260_6sp  | -992,6748  | -992,6748  | 0       | 0       | NS | 0 |  |  |  |  | hypothetical protein              | NA         | NA                                                                                      |
| Supercontig_1.113_MV<br>LG_01918_9sp  | -386,05168 | -386,0514  | 0,00056 | 0,00028 | NS | 0 |  |  |  |  | hypothetical protein              | PF02714.8  | DUF221(Domain of unknown<br>function DUF221)                                            |
| Supercontig_1.3_MVL<br>G_00671_6sp    | -779,78707 | -778,83671 | 1,90072 | 0,6134  | NS | 0 |  |  |  |  | hypothetical protein              | PF04193.7  | PQ-loop(PQ loop repeat)                                                                 |
| Supercontig_1.78_MV<br>LG_05597_10sp  | -1010,2375 | -1008,8347 | 2,80566 | 0,7541  | NS | 0 |  |  |  |  | hypothetical protein              | PF07690.9  | MFS_1(Major Facilitator<br>Superfamily)                                                 |
| Supercontig_1.213_MV<br>LG_07135_9sp  | -606,38597 | -605,85799 | 1,05596 | 0,4102  | NS | 0 |  |  |  |  | hypothetical protein              | NA         | NA                                                                                      |
| Supercontig_1.4_MVL<br>G_00786_7sp    | -575,61978 | -575,61978 | 0       | 0       | NS | 0 |  |  |  |  | hypothetical protein              | NA         | NA                                                                                      |
| Supercontig_1.14_MV<br>LG_01990_11sp  | -374,64138 | -374,64128 | 0,0002  | 0,00016 | NS | 0 |  |  |  |  | hypothetical protein              | NA         | NA                                                                                      |
| Supercontig_1.9_MVL<br>G_01487_7sp    | -671,0869  | -669,79938 | 2,57504 | 0,72405 | NS | 0 |  |  |  |  | hypothetical protein              | PF03403.6  | PAF-AH_p_II(isoform II)                                                                 |
| Supercontig_1.202_MV<br>LG_07090_7sp  | -620,26512 | -620,26512 | 0       | 0       | NS | 0 |  |  |  |  | fructose-bisphosphate<br>aldolase | PF01116.13 | F_bp_aldolase(Fructose-<br>bisphosphate aldolase class-II)                              |
| Supercontig_1.45_MV<br>LG_04233_10sp  | -567,61727 | -566,88293 | 1,46868 | 0,52018 | NS | 0 |  |  |  |  | hypothetical protein              | NA         | NA                                                                                      |
| Supercontig_1.28_MV<br>LG_03169_9sp   | -412,75306 | -412,753   | 0,00012 | 0,00016 | NS | 0 |  |  |  |  | 40S ribosomal protein<br>S19-A    | PF01090.12 | Ribosomal_S19e(Ribosomal<br>protein S19e)                                               |
| Supercontig_1.50_MV<br>LG_04478_6sp   | -971,66324 | -970,99805 | 1,33038 | 0,48582 | NS | 0 |  |  |  |  | haspin protein kinase             | PF12330.1  | DUF3635(Domain of unknown<br>function (DUF3635))                                        |
| Supercontig_1.45_MV<br>LG_04229_9sp   | -517,0253  | -517,02511 | 0,00038 | 0,00019 | NS | 0 |  |  |  |  | hypothetical protein              | PF10176.2  | DUF2370(Protein of unknown<br>function (DUF2370))                                       |
| Supercontig_1.4_MVL<br>G_00857_8sp    | -1276,4924 | -1276,4924 | 0       | 0       | NS | 0 |  |  |  |  | hypothetical protein              | NA         | NA                                                                                      |
| Supercontig_1.47_MV<br>LG_04350_7sp   | -825,46023 | -825,46023 | 0       | 0       | NS | 0 |  |  |  |  | hypothetical protein              | NA         | NA                                                                                      |
| Supercontig_1.125_MV<br>LG_06514_12sp | -373,12006 | -373,12006 | 0       | 0       | NS | 0 |  |  |  |  | hypothetical protein              | PF00439.18 | Bromodomain(Bromodomain)                                                                |



|                                      |            |            |         |         |    |   |   |   |   |   |                                                  |            |                                                                     |
|--------------------------------------|------------|------------|---------|---------|----|---|---|---|---|---|--------------------------------------------------|------------|---------------------------------------------------------------------|
| Supercontig_1.14_MV<br>LG_02004_10sp | -1402,6131 | -1402,292  | 0,6422  | 0,27465 | NS | 0 | □ | □ | □ | □ | hypothetical protein                             | PF10294.2  | Methyltransf_16(Putative methyltransferase)                         |
| Supercontig_1.36_MV<br>LG_03637_9sp  | -845,08611 | -845,08611 | 0       | 0       | NS | 0 | □ | □ | □ | □ | hypothetical protein                             | PF01529.13 | zf-DHHC(DHHC zinc finger domain)                                    |
| Supercontig_1.56_MV<br>LG_04793_8sp  | -490,57779 | -490,57764 | 0,0003  | 0,00015 | NS | 0 | □ | □ | □ | □ | hypothetical protein                             | TIGR00879  | TIGR00879(SP: MFS transporter, sugar porter (SP) family)            |
| Supercontig_1.44_MV<br>LG_04179_9sp  | -1526,7773 | -1526,7491 | 0,05646 | 0,02784 | NS | 0 | □ | □ | □ | □ | hypothetical protein                             | NA         | NA                                                                  |
| Supercontig_1.165_MV<br>LG_06911_9sp | -516,66363 | -516,66363 | 0       | 0       | NS | 0 | □ | □ | □ | □ | hypothetical protein                             | NA         | NA                                                                  |
| Supercontig_1.85_MV<br>LG_05809_10sp | -488,13622 | -488,13622 | 0       | 0       | NS | 0 | □ | □ | □ | □ | hypothetical protein                             | PF01765.12 | RRF(Ribosome recycling factor)                                      |
| Supercontig_1.21_MV<br>LG_02648_8sp  | -1123,2985 | -1123,2192 | 0,15866 | 0,07626 | NS | 0 | □ | □ | □ | □ | hypothetical protein                             | PF00076.15 | RRM_1(RNA recognition motif. (a.k.a. RRM, RBD, or RNP domain))      |
| Supercontig_1.25_MV<br>LG_02923_8sp  | -524,01112 | -523,95708 | 0,10808 | 0,05261 | NS | 0 | □ | □ | □ | □ | hypothetical protein                             | PF02913.12 | FAD-oxidase_C(FAD linked oxidases, C-terminal domain)               |
| Supercontig_1.24_MV<br>LG_02843_10sp | -2150,9527 | -2150,533  | 0,83932 | 0,34273 | NS | 0 | □ | □ | □ | □ | hypothetical protein                             | PF00153.20 | Mito_carr(Mitochondrial carrier protein)                            |
| Supercontig_1.1_MVL<br>G_00275_9sp   | -826,89641 | -822,64472 | 8,50338 | 0,98576 | ** | 0 | □ | □ | □ | □ | hypothetical protein                             | PF00505.12 | HMG_box(HMG (high mobility group) box)                              |
| Supercontig_1.4_MVL<br>G_00810_10sp  | -379,86597 | -379,0133  | 1,70534 | 0,57372 | NS | 0 | □ | □ | □ | □ | hypothetical protein                             | PF09423.3  | PhoD(PhoD-like phosphatase)                                         |
| Supercontig_1.173_MV<br>LG_06956_6sp | -388,57858 | -388,57858 | 0       | 0       | NS | 0 | □ | □ | □ | □ | histone H2B                                      | PF00125.17 | Histone(Core histone H2A/H2B/H3/H4)                                 |
| Supercontig_1.26_MV<br>LG_03035_7sp  | -791,56087 | -791,56087 | 0       | 0       | NS | 0 | □ | □ | □ | □ | hypothetical protein                             | PF00096.19 | zf-C2H2(Zinc finger, C2H2 type)                                     |
| Supercontig_1.5_MVL<br>G_01047_7sp   | -879,002   | -879,002   | 0       | 0       | NS | 0 | □ | □ | □ | □ | electron-transferring-flavoprotein dehydrogenase | PF01494.12 | FAD_binding_3(FAD binding domain)                                   |
| Supercontig_1.73_MV<br>LG_05415_10sp | -470,87074 | -469,0852  | 3,57108 | 0,83229 | NS | 0 | □ | □ | □ | □ | hypothetical protein                             | PF09497.3  | Med12(Transcription mediator complex subunit Med12)                 |
| Supercontig_1.15_MV<br>LG_02155_11sp | -628,9092  | -628,9092  | 0       | 0       | NS | 0 | □ | □ | □ | □ | hypothetical protein                             | TIGR00861  | TIGR00861(MIP: MIP family channel proteins)                         |
| Supercontig_1.57_MV<br>LG_04810_10sp | -628,20247 | -628,19698 | 0,01098 | 0,00547 | NS | 0 | □ | □ | □ | □ | AGC protein kinase                               | PF07714.10 | Pkinase_Tyr(Protein tyrosine kinase)                                |
| Supercontig_1.34_MV<br>LG_03507_8sp  | -634,48062 | -634,48062 | 0       | 0       | NS | 0 | □ | □ | □ | □ | hypothetical protein                             | PF01323.13 | DSBA(DSBA-like thioredoxin domain)                                  |
| Supercontig_1.42_MV<br>LG_04086_8sp  | -341,63377 | -341,63335 | 0,00084 | 0,00042 | NS | 0 | □ | □ | □ | □ | SUMO-conjugating enzyme ubc9                     | PF00179.19 | UQ_con(Ubiquitin-conjugating enzyme)                                |
| Supercontig_1.36_MV<br>LG_03687_8sp  | -444,3657  | -444,3657  | 0       | 0       | NS | 0 | □ | □ | □ | □ | hypothetical protein                             | PF12352.1  | V-SNARE_C(Snare region anchored in the vesicle membrane C-terminus) |
| Supercontig_1.30_MV<br>LG_03312_12sp | -466,69924 | -466,56273 | 0,27302 | 0,1276  | NS | 0 | □ | □ | □ | □ | hypothetical protein                             | NA         | NA                                                                  |
| Supercontig_1.49_MV<br>LG_04450_10sp | -318,17351 | -318,17341 | 0,0002  | 0,00016 | NS | 0 | □ | □ | □ | □ | hypothetical protein                             | PF03142.8  | Chitin_synth_2(Chitin synthase)                                     |
| Supercontig_1.7_MVL<br>G_01339_10sp  | -451,22647 | -450,92051 | 0,61192 | 0,26358 | NS | 0 | □ | □ | □ | □ | hypothetical protein                             | PF08574.3  | DUF1762(Protein of unknown function (DUF1762))                      |
| Supercontig_1.161_MV<br>LG_06865_8sp | -323,60582 | -323,6057  | 0,00024 | 0,00012 | NS | 0 | □ | □ | □ | □ | hypothetical protein                             | PF00650.13 | CRAL_TRIO(CRAL/TRIO domain)                                         |



|                                       |            |            |         |         |    |   |   |   |   |   |                            |            |                                                         |
|---------------------------------------|------------|------------|---------|---------|----|---|---|---|---|---|----------------------------|------------|---------------------------------------------------------|
| Supercontig_1.54_MV<br>LG_04661_8sp   | -574,08941 | -573,10879 | 1,96124 | 0,62492 | NS | 0 | □ | □ | □ | □ | hypothetical protein       | TIGR00568  | TIGR00568(alkb: alkylated DNA repair protein AlkB)      |
| Supercontig_1.16_MV<br>LG_02221_6sp   | -695,04882 | -694,64917 | 0,7993  | 0,32945 | NS | 0 | □ | □ | □ | □ | hypothetical protein       | NA         | NA                                                      |
| Supercontig_1.127_MV<br>LG_06545_10sp | -548,91059 | -548,1028  | 1,61558 | 0,55416 | NS | 0 | □ | □ | □ | □ | hypothetical protein       | PF09731.2  | Mitofilin(Mitochondrial inner membrane protein)         |
| Supercontig_1.17_MV<br>LG_02297_10sp  | -494,71416 | -494,7871  | 0       | 0       | NS | 0 | □ | □ | □ | □ | hypothetical protein       | PF01388.14 | ARID(ARID/BRIGHT DNA binding domain)                    |
| Supercontig_1.15_MV<br>LG_02058_10sp  | -227,48583 | -227,48559 | 0,00048 | 0,00024 | NS | 0 | □ | □ | □ | □ | hypothetical protein       | PF00832.13 | Ribosomal_L39(Ribosomal L39 protein)                    |
| Supercontig_1.18_MV<br>LG_02423_8sp   | -354,31181 | -354,31181 | 0       | 0       | NS | 0 | □ | □ | □ | □ | hypothetical protein       | NA         | NA                                                      |
| Supercontig_1.4_MVL<br>G_00692_10sp   | -942,6396  | -942,55848 | 0,16224 | 0,07792 | NS | 0 | □ | □ | □ | □ | hypothetical protein       | NA         | NA                                                      |
| Supercontig_1.65_MV<br>LG_05149_10sp  | -495,96743 | -495,96743 | 0       | 0       | NS | 0 | □ | □ | □ | □ | hypothetical protein       | NA         | NA                                                      |
| Supercontig_1.61_MV<br>LG_04965_7sp   | -536,91441 | -536,91441 | 0       | 0       | NS | 0 | □ | □ | □ | □ | hypothetical protein       | NA         | NA                                                      |
| Supercontig_1.11_MV<br>LG_01710_7sp   | -1650,7606 | -1650,6988 | 0,12362 | 0,05994 | NS | 0 | □ | □ | □ | □ | hypothetical protein       | TIGR01494  | TIGR01494(ATPase_P-type: HAD ATPase, P-type, family IC) |
| Supercontig_1.24_MV<br>LG_02835_8sp   | -753,61209 | -753,6116  | 0,00098 | 0,00049 | NS | 0 | □ | □ | □ | □ | AGC/NDR/NDR protein kinase | PF07714.10 | Pkinase_Tyr(Protein tyrosine kinase)                    |
| Supercontig_1.54_MV<br>LG_04668_11sp  | -360,72404 | -360,72389 | 0,0003  | 0,00015 | NS | 0 | □ | □ | □ | □ | hypothetical protein       | PF03798.9  | TRAM_LAG1_CLN8(TLC domain)                              |
| Supercontig_1.8_MVL<br>G_01386_8sp    | -1012,326  | -1012,3115 | 0,02886 | 0,01433 | NS | 0 | □ | □ | □ | □ | hypothetical protein       | PF00867.11 | XPG_I(XPG I-region)                                     |
| Supercontig_1.38_MV<br>LG_03820_8sp   | -560,41293 | -560,41261 | 0,00064 | 0,00032 | NS | 0 | □ | □ | □ | □ | hypothetical protein       | PF00400.25 | WD40(WD domain, G-beta repeat)                          |
| Supercontig_1.161_MV<br>LG_06872_8sp  | -1138,1958 | -1138,0162 | 0,35926 | 0,16442 | NS | 0 | □ | □ | □ | □ | hypothetical protein       | NA         | NA                                                      |
| Supercontig_1.41_MV<br>LG_04029_8sp   | -297,07055 | -297,07053 | 0,00016 | 0,00016 | NS | 0 | □ | □ | □ | □ | hypothetical protein       | PF03997.5  | VPS28(VPS28 protein)                                    |
| Supercontig_1.67_MV<br>LG_05233_9sp   | -326,05681 | -326,05655 | 0,00052 | 0,00026 | NS | 0 | □ | □ | □ | □ | hypothetical protein       | PF00005.20 | ABC_tran(ABC transporter)                               |
| Supercontig_1.203_MV<br>LG_07100_8sp  | -416,63164 | -416,63163 | 0,00016 | 0,00016 | NS | 0 | □ | □ | □ | □ | hypothetical protein       | NA         | NA                                                      |
| Supercontig_1.57_MV<br>LG_04807_11sp  | -698,62583 | -698,14503 | 0,9616  | 0,38171 | NS | 0 | □ | □ | □ | □ | CAMKK protein kinase       | PF07714.10 | Pkinase_Tyr(Protein tyrosine kinase)                    |
| Supercontig_1.25_MV<br>LG_02974_8sp   | -404,07737 | -404,07733 | 0,00016 | 0,00016 | NS | 0 | □ | □ | □ | □ | hypothetical protein       | NA         | NA                                                      |
| Supercontig_1.54_MV<br>LG_04658_7sp   | -675,93489 | -675,93489 | 0       | 0       | NS | 0 | □ | □ | □ | □ | hypothetical protein       | PF03371.8  | PRP38(PRP38 family)                                     |
| Supercontig_1.77_MV<br>LG_05564_7sp   | -1000,1827 | -999,3007  | 1,76392 | 0,58603 | NS | 0 | □ | □ | □ | □ | hypothetical protein       | NA         | NA                                                      |
| Supercontig_1.6_MVL<br>G_01147_6sp    | -531,09449 | -529,80312 | 2,58274 | 0,72511 | NS | 0 | □ | □ | □ | □ | hypothetical protein       | PF06212.5  | GRIM-19(GRIM-19 protein)                                |
| Supercontig_1.14_MV<br>LG_02034_9sp   | -704,63352 | -704,63352 | 0       | 0       | NS | 0 | □ | □ | □ | □ | hypothetical protein       | PF04050.7  | Upf2(Up-frameshift suppressor 2)                        |
| Supercontig_1.5_MVL<br>G_01018_9sp    | -860,73006 | -860,73006 | 0       | 0       | NS | 0 | □ | □ | □ | □ | hypothetical protein       | NA         | NA                                                      |



|                                      |            |            |         |         |    |   |  |  |  |  |                                            |            |                                                                                  |
|--------------------------------------|------------|------------|---------|---------|----|---|--|--|--|--|--------------------------------------------|------------|----------------------------------------------------------------------------------|
| Supercontig_1.46_MV<br>LG_04245_10sp | -1361,5642 | -1361,4952 | 0,13798 | 0,06666 | NS | 0 |  |  |  |  | hypothetical protein                       | NA         | NA                                                                               |
| Supercontig_1.28_MV<br>LG_03164_6sp  | -540,5394  | -540,5394  | 0       | 0       | NS | 0 |  |  |  |  | hypothetical protein                       | NA         | NA                                                                               |
| Supercontig_1.100_MV<br>LG_06129_7sp | -504,60184 | -504,26315 | 0,67738 | 0,2873  | NS | 0 |  |  |  |  | hypothetical protein                       | NA         | NA                                                                               |
| Supercontig_1.19_MV<br>LG_02442_9sp  | -746,78879 | -745,30139 | 2,9748  | 0,77404 | NS | 0 |  |  |  |  | hypothetical protein                       | PF00378.13 | ECH(Enoyl-CoA hydratase/isomerase family)                                        |
| Supercontig_1.1_MVL<br>G_00098_10sp  | -469,35739 | -469,35708 | 0,00062 | 0,00031 | NS | 0 |  |  |  |  | ribose-phosphate pyrophosphokinase         | TIGR01251  | TIGR01251(ribP_PPkin: ribose-phosphate diphosphokinase)                          |
| Supercontig_1.5_MVL<br>G_01002_10sp  | -506,81411 | -506,81411 | 0       | 0       | NS | 0 |  |  |  |  | nicotinate phosphoribosyltransferase       | TIGR01514  | TIGR01514(NAPRTase: nicotinate phosphoribosyltransferase)                        |
| Supercontig_1.63_MV<br>LG_05048_7sp  | -303,12321 | -303,12314 | 0,00014 | 0,00016 | NS | 0 |  |  |  |  | hypothetical protein                       | PF08991.3  | DUF1903(Domain of unknown function (DUF1903))                                    |
| Supercontig_1.85_MV<br>LG_05796_11sp | -609,89642 | -609,89642 | 0       | 0       | NS | 0 |  |  |  |  | pre-mRNA-splicing factor RSE1              | PF03178.8  | CPSF_A(CPSF A subunit region)                                                    |
| Supercontig_1.76_MV<br>LG_05510_10sp | -556,18059 | -556,18029 | 0,0006  | 0,0003  | NS | 0 |  |  |  |  | hypothetical protein                       | PF00571.21 | CBS(CBS domain)                                                                  |
| Supercontig_1.5_MVL<br>G_00921_7sp   | -783,26822 | -781,78981 | 2,95682 | 0,772   | NS | 0 |  |  |  |  | hypothetical protein                       | NA         | NA                                                                               |
| Supercontig_1.83_MV<br>LG_05745_8sp  | -763,30112 | -761,90244 | 2,79736 | 0,75308 | NS | 0 |  |  |  |  | hypothetical protein                       | PF06966.5  | DUF1295(Protein of unknown function (DUF1295))                                   |
| Supercontig_1.11_MV<br>LG_01693_9sp  | -1180,3907 | -1180,3192 | 0,14304 | 0,06902 | NS | 0 |  |  |  |  | DNA polymerase epsilon catalytic subunit A | PF10108.2  | Exon_PolB(Predicted 3'-5' exonuclease related to the exonuclease domain of PolB) |
| Supercontig_1.10_MV<br>LG_01685_9sp  | -413,35302 | -413,14818 | 0,40968 | 0,18522 | NS | 0 |  |  |  |  | hypothetical protein                       | NA         | NA                                                                               |
| Supercontig_1.4_MVL<br>G_00837_8sp   | -1171,3186 | -1170,533  | 1,57104 | 0,54412 | NS | 0 |  |  |  |  | hypothetical protein                       | PF00649.11 | Copper-fist(Copper fist DNA binding domain)                                      |
| Supercontig_1.34_MV<br>LG_03555_8sp  | -752,01559 | -752,01544 | 0,0003  | 0,00015 | NS | 0 |  |  |  |  | pre-mRNA-splicing factor CEF1              | PF00249.24 | Myb_DNA-binding(Myb-like DNA-binding domain)                                     |
| Supercontig_1.48_MV<br>LG_04362_7sp  | -798,69458 | -798,69458 | 0       | 0       | NS | 0 |  |  |  |  | hypothetical protein                       | NA         | NA                                                                               |
| Supercontig_1.19_MV<br>LG_02453_8sp  | -627,78275 | -627,78275 | 0       | 0       | NS | 0 |  |  |  |  | hypothetical protein                       | PF09848.2  | DUF2075(Uncharacterized conserved protein (DUF2075))                             |
| Supercontig_1.110_MV<br>LG_06301_9sp | -393,75225 | -393,75212 | 0,00026 | 0,00013 | NS | 0 |  |  |  |  | carnitine O-acetyltransferase              | PF00755.13 | Carn_acyltransf(Choline/Carnitine o-acetyltransferase)                           |
| Supercontig_1.76_MV<br>LG_05536_11sp | -415,2823  | -415,27251 | 0,01958 | 0,00974 | NS | 0 |  |  |  |  | hypothetical protein                       | PF07103.4  | DUF1365(Protein of unknown function (DUF1365))                                   |
| Supercontig_1.34_MV<br>LG_03527_8sp  | -252,73724 | -252,73719 | 0,0001  | 0,00016 | NS | 0 |  |  |  |  | hypothetical protein                       | NA         | NA                                                                               |
| Supercontig_1.34_MV<br>LG_03512_11sp | -470,65897 | -469,76065 | 1,79664 | 0,59275 | NS | 0 |  |  |  |  | hypothetical protein                       | PF09320.4  | DUF1977(Domain of unknown function (DUF1977))                                    |
| Supercontig_1.30_MV<br>LG_03311_9sp  | -637,43686 | -635,75285 | 3,36802 | 0,81437 | NS | 0 |  |  |  |  | hypothetical protein                       | PF03399.9  | SAC3_GANP(SAC3/GANP/Nin1/mts3/eIF-3 p25 family)                                  |
| Supercontig_1.15_MV<br>LG_02062_8sp  | -404,74301 | -404,73575 | 0,01452 | 0,00723 | NS | 0 |  |  |  |  | hypothetical protein                       | NA         | NA                                                                               |
| Supercontig_1.18_MV<br>LG_02420_10sp | -439,37804 | -439,39325 | 0       | 0       | NS | 0 |  |  |  |  | hypothetical protein                       | PF01494.12 | FAD_binding_3(FAD binding domain)                                                |

|                                       |            |            |         |         |     |   |  |  |  |  |                                            |            |                                                                |
|---------------------------------------|------------|------------|---------|---------|-----|---|--|--|--|--|--------------------------------------------|------------|----------------------------------------------------------------|
| Supercontig_1.2_MVL<br>G_00310_6sp    | -592,09152 | -591,38046 | 1,42212 | 0,50888 | NS  | 0 |  |  |  |  | hypothetical protein                       | PF04083.9  | Abhydro_lipase(ab-hydrolase associated lipase region)          |
| Supercontig_1.10_MV<br>LG_01682_11sp  | -568,49665 | -568,49639 | 0,00052 | 0,00026 | NS  | 0 |  |  |  |  | eukaryotic translation initiation factor 6 | TIGR00323  | TIGR00323(eIF-6: putative translation initiation factor eIF-6) |
| Supercontig_1.50_MV<br>LG_04473_11sp  | -1259,8327 | -1259,8321 | 0,00118 | 0,00059 | NS  | 0 |  |  |  |  | hypothetical protein                       | PF02127.8  | Peptidase_M18(Aminopeptidase I zinc metalloprotease (M18))     |
| Supercontig_1.17_MV<br>LG_02288_6sp   | -872,22186 | -870,31026 | 3,8232  | 0,85216 | NS  | 0 |  |  |  |  | hypothetical protein                       | PF00188.19 | CAP(Cysteine-rich secretory protein family)                    |
| Supercontig_1.34_MV<br>LG_03568_9sp   | -405,73164 | -405,73164 | 0       | 0       | NS  | 0 |  |  |  |  | cytochrome c peroxidase                    | PF00141.16 | peroxidase(Peroxidase)                                         |
| Supercontig_1.24_MV<br>LG_02889_10sp  | -818,30576 | -818,30564 | 0,00024 | 0,00012 | NS  | 0 |  |  |  |  | CAMK protein kinase                        | PF07714.10 | Pkinase_Tyr(Protein tyrosine kinase)                           |
| Supercontig_1.113_MV<br>LG_06347_7sp  | -1427,5289 | -1427,5288 | 0,00014 | 0,00016 | NS  | 0 |  |  |  |  | hypothetical protein                       | PF00557.17 | Peptidase_M24(Metallopeptidase family M24)                     |
| Supercontig_1.16_MV<br>LG_02228_6sp   | -676,18569 | -676,18518 | 0,00102 | 0,00051 | NS  | 0 |  |  |  |  | hypothetical protein                       | PF02421.11 | FeoB_N(Ferrous iron transport protein B)                       |
| Supercontig_1.16_MV<br>LG_02250_8sp   | -345,29522 | -345,29519 | 0,00016 | 0,00016 | NS  | 0 |  |  |  |  | hypothetical protein                       | PF09809.2  | MRP-L27(Mitochondrial ribosomal protein L27)                   |
| Supercontig_1.2_MVL<br>G_00387_11sp   | -472,25603 | -472,25598 | 0,00016 | 0,00016 | NS  | 0 |  |  |  |  | hypothetical protein                       | PF00571.21 | CBS(CBS domain)                                                |
| Supercontig_1.13_MV<br>LG_01967_7sp   | -476,65855 | -476,65855 | 0       | 0       | NS  | 0 |  |  |  |  | hypothetical protein                       | NA         | NA                                                             |
| Supercontig_1.79_MV<br>LG_05616_9sp   | -463,2325  | -463,23237 | 0,00026 | 0,00013 | NS  | 0 |  |  |  |  | hypothetical protein                       | NA         | NA                                                             |
| Supercontig_1.155_MV<br>LG_06818_10sp | -862,86148 | -860,67632 | 4,37032 | 0,88754 | NS  | 0 |  |  |  |  | hypothetical protein                       | PF03828.12 | PAP_assoc(Poly(A) polymerase)                                  |
| Supercontig_1.18_MV<br>LG_02381_8sp   | -1040,505  | -1040,4354 | 0,1392  | 0,06723 | NS  | 0 |  |  |  |  | proline iminopeptidase                     | TIGR01249  | TIGR01249(pro_imino_pep_1: prolyl aminopeptidase)              |
| Supercontig_1.25_MV<br>LG_02982_9sp   | -601,1115  | -601,1115  | 0       | 0       | NS  | 0 |  |  |  |  | hypothetical protein                       | PF02114.9  | Phosducin(Phosducin)                                           |
| Supercontig_1.16_MV<br>LG_02214_8sp   | -538,81754 | -538,81754 | 0       | 0       | NS  | 0 |  |  |  |  | hypothetical protein                       | NA         | NA                                                             |
| Supercontig_1.35_MV<br>LG_03614_9sp   | -779,46859 | -779,46859 | 0       | 0       | NS  | 0 |  |  |  |  | hypothetical protein                       | NA         | NA                                                             |
| Supercontig_1.5_MVL<br>G_00931_7sp    | -998,33743 | -992,04201 | 12,5908 | 0,99816 | *** | 0 |  |  |  |  | hypothetical protein                       | NA         | NA                                                             |
| Supercontig_1.41_MV<br>LG_03973_6sp   | -431,25353 | -431,22854 | 0,04998 | 0,02468 | NS  | 0 |  |  |  |  | hypothetical protein                       | PF00076.15 | RRM_1(RNA recognition motif. (a.k.a. RRM, RBD, or RNP domain)) |
| Supercontig_1.7_MVL<br>G_01266_6sp    | -1435,1542 | -1432,1119 | 6,08456 | 0,95227 | **  | 0 |  |  |  |  | hypothetical protein                       | PF10250.2  | O-FucT(GDP-fucose protein O-fucosyltransferase)                |
| Supercontig_1.29_MV<br>LG_03240_9sp   | -665,67085 | -665,6706  | 0,0005  | 0,00025 | NS  | 0 |  |  |  |  | tubulin alpha chain                        | PF00091.18 | Tubulin(Tubulin/FtsZ family, GTPase domain)                    |
| Supercontig_1.56_MV<br>LG_04790_7sp   | -528,74703 | -528,55123 | 0,3916  | 0,17782 | NS  | 0 |  |  |  |  | hypothetical protein                       | PF02798.13 | GST_N(Glutathione S-transferase, N-terminal domain)            |
| Supercontig_1.170_MV<br>LG_06939_8sp  | -510,69659 | -510,52906 | 0,33506 | 0,15425 | NS  | 0 |  |  |  |  | hypothetical protein                       | NA         | NA                                                             |
| Supercontig_1.29_MV<br>LG_03244_7sp   | -1775,6351 | -1775,6351 | 0       | 0       | NS  | 0 |  |  |  |  | hypothetical protein                       | PF09335.4  | SNARE_assoc(SNARE associated Golgi protein)                    |

|                                       |            |            |         |         |    |   |   |   |   |   |   |   |                                        |            |                                                                   |
|---------------------------------------|------------|------------|---------|---------|----|---|---|---|---|---|---|---|----------------------------------------|------------|-------------------------------------------------------------------|
| Supercontig_1.67_MV<br>LG_05236_12sp  | -558,02241 | -558,02241 | 0       | 0       | NS | 0 | 0 | 0 | 0 | 0 | 0 | 0 | hypothetical protein                   | PF02900.11 | LigB(Catalytic LigB subunit of aromatic ring-opening dioxygenase) |
| Supercontig_1.32_MV<br>LG_03424_10sp  | -488,75005 | -488,75005 | 0       | 0       | NS | 0 | 0 | 0 | 0 | 0 | 0 | 0 | hypothetical protein                   | NA         | NA                                                                |
| Supercontig_1.16_MV<br>LG_02178_9sp   | -568,23684 | -568,23671 | 0,00026 | 0,00013 | NS | 0 | 0 | 0 | 0 | 0 | 0 | 0 | glutathione S-transferase omega-like 2 | PF00043.18 | GST_C(Glutathione S-transferase, C-terminal domain)               |
| Supercontig_1.131_MV<br>LG_06585_9sp  | -616,06884 | -615,97954 | 0,1786  | 0,08543 | NS | 0 | 0 | 0 | 0 | 0 | 0 | 0 | hypothetical protein                   | PF03061.15 | 4HBT(Thioesterase superfamily)                                    |
| Supercontig_1.25_MV<br>LG_02984_10sp  | -1744,8945 | -1744,8341 | 0,12072 | 0,05857 | NS | 0 | 0 | 0 | 0 | 0 | 0 | 0 | hypothetical protein                   | PF00018.21 | SH3_1(SH3 domain)                                                 |
| Supercontig_1.6_MVL<br>G_01128_10sp   | -433,71    | -431,58406 | 4,25188 | 0,88068 | NS | 0 | 0 | 0 | 0 | 0 | 0 | 0 | hypothetical protein                   | PF01602.13 | Adaptin_N(Adaptin N terminal region)                              |
| Supercontig_1.120_MV<br>LG_06425_11sp | -849,41604 | -849,38921 | 0,05366 | 0,02647 | NS | 0 | 0 | 0 | 0 | 0 | 0 | 0 | hypothetical protein                   | NA         | NA                                                                |
| Supercontig_1.13_MV<br>LG_01922_6sp   | -590,07197 | -590,07197 | 0       | 0       | NS | 0 | 0 | 0 | 0 | 0 | 0 | 0 | hypothetical protein                   | PF00324.14 | AA_permease(Amino acid permease)                                  |
| Supercontig_1.70_MV<br>LG_05322_9sp   | -1264,4695 | -1264,4345 | 0,07012 | 0,03445 | NS | 0 | 0 | 0 | 0 | 0 | 0 | 0 | hypothetical protein                   | NA         | NA                                                                |
| Supercontig_1.10_MV<br>LG_01674_9sp   | -705,52924 | -704,96646 | 1,12556 | 0,43038 | NS | 0 | 0 | 0 | 0 | 0 | 0 | 0 | hypothetical protein                   | PF01424.15 | R3H(R3H domain)                                                   |
| Supercontig_1.47_MV<br>LG_04310_10sp  | -642,73262 | -642,73262 | 0       | 0       | NS | 0 | 0 | 0 | 0 | 0 | 0 | 0 | hypothetical protein                   | PF02678.9  | Pirin(Pirin)                                                      |
| Supercontig_1.26_MV<br>LG_03023_8sp   | -600,02695 | -599,11591 | 1,82208 | 0,59789 | NS | 0 | 0 | 0 | 0 | 0 | 0 | 0 | hypothetical protein                   | NA         | NA                                                                |
| Supercontig_1.2_MVL<br>G_00431_9sp    | -367,70353 | -367,68133 | 0,0444  | 0,02196 | NS | 0 | 0 | 0 | 0 | 0 | 0 | 0 | hypothetical protein                   | PF04051.9  | TRAPP(Transport protein particle (TRAPP) component)               |
| Supercontig_1.12_MV<br>LG_01812_10sp  | -566,3886  | -565,96604 | 0,84512 | 0,34463 | NS | 0 | 0 | 0 | 0 | 0 | 0 | 0 | hypothetical protein                   | PF00856.21 | SET(SET domain)                                                   |
| Supercontig_1.97_MV<br>LG_06061_9sp   | -990,8519  | -990,56138 | 0,58104 | 0,25213 | NS | 0 | 0 | 0 | 0 | 0 | 0 | 0 | hypothetical protein                   | PF00388.12 | PI-PLC-X(Phosphatidylinositol-specific phospholipase C, X domain) |
| Supercontig_1.33_MV<br>LG_03476_10sp  | -658,23899 | -658,23899 | 0       | 0       | NS | 0 | 0 | 0 | 0 | 0 | 0 | 0 | hypothetical protein                   | PF08217.4  | DUF1712(Fungal domain of unknown function (DUF1712))              |
| Supercontig_1.5_MVL<br>G_00945_11sp   | -611,57758 | -611,57758 | 0       | 0       | NS | 0 | 0 | 0 | 0 | 0 | 0 | 0 | hypothetical protein                   | PF00249.24 | Myb_DNA-binding(Myb-like DNA-binding domain)                      |
| Supercontig_1.15_MV<br>LG_02071_10sp  | -671,61531 | -671,61127 | 0,00808 | 0,00403 | NS | 0 | 0 | 0 | 0 | 0 | 0 | 0 | hypothetical protein                   | NA         | NA                                                                |
| Supercontig_1.7_MVL<br>G_01247_6sp    | -266,33793 | -266,30445 | 0,06696 | 0,03293 | NS | 0 | 0 | 0 | 0 | 0 | 0 | 0 | histone H4                             | PF00125.17 | Histone(Core histone H2A/H2B/H3/H4)                               |
| Supercontig_1.42_MV<br>LG_04060_8sp   | -792,23874 | -792,23874 | 0       | 0       | NS | 0 | 0 | 0 | 0 | 0 | 0 | 0 | hypothetical protein                   | PF00400.25 | WD40(WD domain, G-beta repeat)                                    |
| Supercontig_1.26_MV<br>LG_03029_10sp  | -1093,5487 | -1093,5487 | 0       | 0       | NS | 0 | 0 | 0 | 0 | 0 | 0 | 0 | hypothetical protein                   | PF08637.3  | NCA2(ATP synthase regulation protein NCA2)                        |
| Supercontig_1.52_MV<br>LG_04581_8sp   | -663,98906 | -663,98899 | 0,00014 | 0,00016 | NS | 0 | 0 | 0 | 0 | 0 | 0 | 0 | hypothetical protein                   | NA         | NA                                                                |
| Supercontig_1.10_MV<br>LG_01649_11sp  | -914,18155 | -914,18155 | 0       | 0       | NS | 0 | 0 | 0 | 0 | 0 | 0 | 0 | IKS protein kinase                     | PF07714.10 | Pkinase_Tyr(Protein tyrosine kinase)                              |
| Supercontig_1.55_MV<br>LG_04731_8sp   | -484,61971 | -484,61961 | 0,0002  | 0,00016 | NS | 0 | 0 | 0 | 0 | 0 | 0 | 0 | STE/STE7 protein kinase                | PF07714.10 | Pkinase_Tyr(Protein tyrosine kinase)                              |

|                                      |            |            |         |         |    |   |   |   |   |   |   |   |   |   |   |   |   |   |   |                                                                    |            |                                                             |
|--------------------------------------|------------|------------|---------|---------|----|---|---|---|---|---|---|---|---|---|---|---|---|---|---|--------------------------------------------------------------------|------------|-------------------------------------------------------------|
| Supercontig_1.21_MV<br>LG_02640_10sp | -731,29143 | -731,29143 | 0       | 0       | NS | 0 | 0 | 0 | 0 | 0 | 0 | 0 | 0 | 0 | 0 | 0 | 0 | 0 | 0 | hypothetical protein                                               | PF00732.12 | GMC_oxred_N(GMC oxidoreductase)                             |
| Supercontig_1.40_MV<br>LG_03912_9sp  | -573,48607 | -573,486   | 0,00014 | 0,00016 | NS | 0 | 0 | 0 | 0 | 0 | 0 | 0 | 0 | 0 | 0 | 0 | 0 | 0 | 0 | hypothetical protein                                               | PF00567.17 | TUDOR(Tudor domain)                                         |
| Supercontig_1.1_MVL<br>G_00166_12sp  | -438,30395 | -436,92064 | 2,76662 | 0,74925 | NS | 0 | 0 | 0 | 0 | 0 | 0 | 0 | 0 | 0 | 0 | 0 | 0 | 0 | 0 | hypothetical protein                                               | NA         | NA                                                          |
| Supercontig_1.100_MV<br>LG_06127_7sp | -981,181   | -981,181   | 0       | 0       | NS | 0 | 0 | 0 | 0 | 0 | 0 | 0 | 0 | 0 | 0 | 0 | 0 | 0 | 0 | hypothetical protein                                               | PF00270.22 | DEAD(DEAD/DEAH box helicase)                                |
| Supercontig_1.143_MV<br>LG_06718_6sp | -494,96496 | -494,96486 | 0,0002  | 0,00016 | NS | 0 | 0 | 0 | 0 | 0 | 0 | 0 | 0 | 0 | 0 | 0 | 0 | 0 | 0 | hypothetical protein                                               | NA         | NA                                                          |
| Supercontig_1.2_MVL<br>G_00312_10sp  | -611,10554 | -609,51968 | 3,17172 | 0,79523 | NS | 0 | 0 | 0 | 0 | 0 | 0 | 0 | 0 | 0 | 0 | 0 | 0 | 0 | 0 | hypothetical protein                                               | PF06108.5  | DUF952(Protein of unknown function (DUF952))                |
| Supercontig_1.82_MV<br>LG_05704_7sp  | -619,3765  | -619,3765  | 0       | 0       | NS | 0 | 0 | 0 | 0 | 0 | 0 | 0 | 0 | 0 | 0 | 0 | 0 | 0 | 0 | hypothetical protein                                               | NA         | NA                                                          |
| Supercontig_1.33_MV<br>LG_03484_11sp | -390,1943  | -389,21357 | 1,96146 | 0,62496 | NS | 0 | 0 | 0 | 0 | 0 | 0 | 0 | 0 | 0 | 0 | 0 | 0 | 0 | 0 | hypothetical protein                                               | PF01161.13 | PBP(Phosphatidylethanolamine-binding protein)               |
| Supercontig_1.56_MV<br>LG_04782_6sp  | -480,56305 | -480,55821 | 0,00968 | 0,00483 | NS | 0 | 0 | 0 | 0 | 0 | 0 | 0 | 0 | 0 | 0 | 0 | 0 | 0 | 0 | hypothetical protein                                               | PF04389.10 | Peptidase_M28(Peptidase family M28)                         |
| Supercontig_1.73_MV<br>LG_05414_7sp  | -709,34307 | -708,22096 | 2,24422 | 0,67441 | NS | 0 | 0 | 0 | 0 | 0 | 0 | 0 | 0 | 0 | 0 | 0 | 0 | 0 | 0 | cysteine synthase                                                  | PF00291.18 | PALP(Pyridoxal-phosphate dependent enzyme)                  |
| Supercontig_1.5_MVL<br>G_00993_9sp   | -376,60119 | -376,60119 | 0       | 0       | NS | 0 | 0 | 0 | 0 | 0 | 0 | 0 | 0 | 0 | 0 | 0 | 0 | 0 | 0 | hypothetical protein                                               | PF10209.2  | DUF2340(Uncharacterized conserved protein (DUF2340))        |
| Supercontig_1.11_MV<br>LG_01713_8sp  | -384,54309 | -383,95922 | 1,16774 | 0,44226 | NS | 0 | 0 | 0 | 0 | 0 | 0 | 0 | 0 | 0 | 0 | 0 | 0 | 0 | 0 | hypothetical protein                                               | PF01464.13 | SLT(Transglycosylase SLT domain)                            |
| Supercontig_1.2_MVL<br>G_00419_8sp   | -1974,572  | -1972,657  | 3,82996 | 0,85266 | NS | 0 | 0 | 0 | 0 | 0 | 0 | 0 | 0 | 0 | 0 | 0 | 0 | 0 | 0 | hypothetical protein                                               | PF08737.3  | Rgp1(Rgp1)                                                  |
| Supercontig_1.3_MVL<br>G_00668_9sp   | -500,09724 | -500,09724 | 0       | 0       | NS | 0 | 0 | 0 | 0 | 0 | 0 | 0 | 0 | 0 | 0 | 0 | 0 | 0 | 0 | short-chain dehydrogenase                                          | PF00106.18 | adh_short(short chain dehydrogenase)                        |
| Supercontig_1.85_MV<br>LG_05806_10sp | -601,68413 | -601,68412 | 0,00016 | 0,00016 | NS | 0 | 0 | 0 | 0 | 0 | 0 | 0 | 0 | 0 | 0 | 0 | 0 | 0 | 0 | hypothetical protein                                               | NA         | NA                                                          |
| Supercontig_1.116_MV<br>LG_06371_9sp | -553,44363 | -552,25606 | 2,37514 | 0,69504 | NS | 0 | 0 | 0 | 0 | 0 | 0 | 0 | 0 | 0 | 0 | 0 | 0 | 0 | 0 | hypothetical protein                                               | NA         | NA                                                          |
| Supercontig_1.31_MV<br>LG_03338_6sp  | -533,51496 | -532,93745 | 1,15502 | 0,43871 | NS | 0 | 0 | 0 | 0 | 0 | 0 | 0 | 0 | 0 | 0 | 0 | 0 | 0 | 0 | hypothetical protein                                               | NA         | NA                                                          |
| Supercontig_1.9_MVL<br>G_01541_6sp   | -787,09629 | -784,83029 | 4,532   | 0,89627 | NS | 0 | 0 | 0 | 0 | 0 | 0 | 0 | 0 | 0 | 0 | 0 | 0 | 0 | 0 | hypothetical protein                                               | NA         | NA                                                          |
| Supercontig_1.9_MVL<br>G_01531_10sp  | -400,35269 | -400,32704 | 0,0513  | 0,02532 | NS | 0 | 0 | 0 | 0 | 0 | 0 | 0 | 0 | 0 | 0 | 0 | 0 | 0 | 0 | hypothetical protein                                               | NA         | NA                                                          |
| Supercontig_1.2_MVL<br>G_00475_6sp   | -642,06206 | -641,43495 | 1,25422 | 0,46587 | NS | 0 | 0 | 0 | 0 | 0 | 0 | 0 | 0 | 0 | 0 | 0 | 0 | 0 | 0 | hypothetical protein                                               | NA         | NA                                                          |
| Supercontig_1.16_MV<br>LG_02188_10sp | -481,81696 | -481,81696 | 0       | 0       | NS | 0 | 0 | 0 | 0 | 0 | 0 | 0 | 0 | 0 | 0 | 0 | 0 | 0 | 0 | glucose-repressible alcohol dehydrogenase transcriptional effector | PF03372.16 | Exo_endo_phos(Endonuclease/ Exonuclease/phosphatase family) |
| Supercontig_1.39_MV<br>LG_03865_7sp  | -336,56423 | -336,31704 | 0,49438 | 0,21901 | NS | 0 | 0 | 0 | 0 | 0 | 0 | 0 | 0 | 0 | 0 | 0 | 0 | 0 | 0 | hypothetical protein                                               | PF09421.3  | FRQ(Frequency clock protein)                                |
| Supercontig_1.3_MVL<br>G_00673_8sp   | -644,96555 | -644,96555 | 0       | 0       | NS | 0 | 0 | 0 | 0 | 0 | 0 | 0 | 0 | 0 | 0 | 0 | 0 | 0 | 0 | hypothetical protein                                               | PF03162.6  | Y_phosphatase2(Tyrosine phosphatase family)                 |
| Supercontig_1.59_MV<br>LG_04905_6sp  | -522,32639 | -522,32639 | 0       | 0       | NS | 0 | 0 | 0 | 0 | 0 | 0 | 0 | 0 | 0 | 0 | 0 | 0 | 0 | 0 | hypothetical protein                                               | NA         | NA                                                          |

|                                       |            |            |         |         |    |   |  |  |  |                                                                         |            |                                                                        |
|---------------------------------------|------------|------------|---------|---------|----|---|--|--|--|-------------------------------------------------------------------------|------------|------------------------------------------------------------------------|
| Supercontig_1.5_MVL<br>G_00999_7sp    | -645,59309 | -644,75142 | 1,68334 | 0,56901 | NS | 0 |  |  |  | hypothetical protein                                                    | NA         | NA                                                                     |
| Supercontig_1.5_MVL<br>G_00913_8sp    | -974,47954 | -974,37884 | 0,2014  | 0,0958  | NS | 0 |  |  |  | hypothetical protein                                                    | PF02833.7  | DHHA2(DHHA2 domain)                                                    |
| Supercontig_1.135_MV<br>LG_06625_8sp  | -503,70447 | -503,60197 | 0,205   | 0,09742 | NS | 0 |  |  |  | hypothetical protein                                                    | PF09435.3  | DUF2015(Fungal protein of unknown function (DUF2015))                  |
| Supercontig_1.96_MV<br>LG_06037_10sp  | -619,11982 | -619,11982 | 0       | 0       | NS | 0 |  |  |  | hypothetical protein                                                    | PF03473.10 | MOSC(MOSC domain)                                                      |
| Supercontig_1.80_MV<br>LG_05644_11sp  | -677,62068 | -677,57427 | 0,09282 | 0,04535 | NS | 0 |  |  |  | hypothetical protein                                                    | NA         | NA                                                                     |
| Supercontig_1.4_MVL<br>G_00768_12sp   | -436,48881 | -436,48873 | 0,00016 | 0,00016 | NS | 0 |  |  |  | hypothetical protein                                                    | NA         | NA                                                                     |
| Supercontig_1.26_MV<br>LG_02994_9sp   | -734,1904  | -734,1904  | 0       | 0       | NS | 0 |  |  |  | hypothetical protein                                                    | PF04603.5  | Mog1(Ran-interacting Mog1 protein)                                     |
| Supercontig_1.14_MV<br>LG_01978_8sp   | -441,89539 | -441,89539 | 0       | 0       | NS | 0 |  |  |  | hypothetical protein                                                    | PF02148.12 | zf-UBP(Zn-finger in ubiquitin-hydrolases and other protein)            |
| Supercontig_1.205_MV<br>LG_07109_8sp  | -376,55799 | -376,55799 | 0       | 0       | NS | 0 |  |  |  | hypothetical protein                                                    | NA         | NA                                                                     |
| Supercontig_1.3_MVL<br>G_00665_11sp   | -504,93766 | -504,93766 | 0       | 0       | NS | 0 |  |  |  | hypothetical protein                                                    | PF09729.2  | Gti1_Pac2(Gti1/Pac2 family)                                            |
| Supercontig_1.156_MV<br>LG_06836_12sp | -341,84495 | -341,84482 | 0,00026 | 0,00013 | NS | 0 |  |  |  | minichromosome maintenance protein 4 (cell division control protein 54) | PF00493.16 | MCM(MCM2/3/5 family)                                                   |
| Supercontig_1.6_MVL<br>G_01180_10sp   | -482,752   | -482,11703 | 1,26994 | 0,47005 | NS | 0 |  |  |  | hypothetical protein                                                    | NA         | NA                                                                     |
| Supercontig_1.86_MV<br>LG_05827_10sp  | -785,14972 | -784,14713 | 2,00518 | 0,63307 | NS | 0 |  |  |  | hypothetical protein                                                    | NA         | NA                                                                     |
| Supercontig_1.99_MV<br>LG_06106_10sp  | -795,90922 | -795,90922 | 0       | 0       | NS | 0 |  |  |  | hypothetical protein                                                    | NA         | NA                                                                     |
| Supercontig_1.28_MV<br>LG_03159_9sp   | -288,94284 | -287,99726 | 1,89116 | 0,61155 | NS | 0 |  |  |  | acetyl-CoA acetyltransferase                                            | TIGR01930  | TIGR01930(AcCoA-C-Actrans: acetyl-CoA C-acetyltransferase)             |
| Supercontig_1.61_MV<br>LG_04962_8sp   | -595,90476 | -595,90476 | 0       | 0       | NS | 0 |  |  |  | hypothetical protein                                                    | NA         | NA                                                                     |
| Supercontig_1.41_MV<br>LG_04019_8sp   | -595,86434 | -595,86434 | 0       | 0       | NS | 0 |  |  |  | hypothetical protein                                                    | PF02582.7  | DUF155(Uncharacterised ACR, YagE family COG1723)                       |
| Supercontig_1.12_MV<br>LG_01859_7sp   | -821,11657 | -821,11657 | 0       | 0       | NS | 0 |  |  |  | hypothetical protein                                                    | TIGR00879  | TIGR00879(SP: MFS transporter, sugar porter (SP) family)               |
| Supercontig_1.34_MV<br>LG_03516_6sp   | -961,16097 | -960,59859 | 1,12476 | 0,43015 | NS | 0 |  |  |  | hypothetical protein                                                    | NA         | NA                                                                     |
| Supercontig_1.2_MVL<br>G_00483_7sp    | -1553,6344 | -1552,4775 | 2,31372 | 0,68553 | NS | 0 |  |  |  | hypothetical protein                                                    | NA         | NA                                                                     |
| Supercontig_1.39_MV<br>LG_03867_8sp   | -1845,5171 | -1845,5171 | 0       | 0       | NS | 0 |  |  |  | hypothetical protein                                                    | NA         | NA                                                                     |
| Supercontig_1.111_MV<br>LG_06305_9sp  | -898,8714  | -897,07877 | 3,58526 | 0,83348 | NS | 0 |  |  |  | hypothetical protein                                                    | TIGR00322  | TIGR00322(diphth2_R: diphthamide biosynthesis enzyme Dph1/Dph2 domain) |
| Supercontig_1.51_MV<br>LG_04517_8sp   | -717,43241 | -717,43241 | 0       | 0       | NS | 0 |  |  |  | hypothetical protein                                                    | PF01764.18 | Lipase_3(Lipase (class 3))                                             |

|                                       |            |            |         |         |    |   |  |  |  |  |                                            |            |                                                                             |
|---------------------------------------|------------|------------|---------|---------|----|---|--|--|--|--|--------------------------------------------|------------|-----------------------------------------------------------------------------|
| Supercontig_1.48_MV<br>LG_04376_9sp   | -552,58806 | -552,58785 | 0,00042 | 0,00021 | NS | 0 |  |  |  |  | hypothetical protein                       | PF02906.7  | Fe_hyd_Ig_C(Iron only hydrogenase large subunit, C-terminal domain)         |
| Supercontig_1.12_MV<br>LG_01807_7sp   | -942,19652 | -940,96682 | 2,4594  | 0,70762 | NS | 0 |  |  |  |  | hypothetical protein                       | NA         | NA                                                                          |
| Supercontig_1.78_MV<br>LG_05580_8sp   | -383,82608 | -383,82571 | 0,00074 | 0,00037 | NS | 0 |  |  |  |  | protein transporter<br>SEC61 subunit alpha | TIGR00967  | TIGR00967(3a0501s007:<br>preprotein translocase, SecY subunit)              |
| Supercontig_1.2_MVL<br>G_00311_8sp    | -1199,1921 | -1199,1921 | 0       | 0       | NS | 0 |  |  |  |  | hypothetical protein                       | NA         | NA                                                                          |
| Supercontig_1.1_MVL<br>G_00104_7sp    | -616,49436 | -616,49423 | 0,00026 | 0,00013 | NS | 0 |  |  |  |  | hypothetical protein                       | PF00107.19 | ADH_zinc_N(Zinc-binding dehydrogenase)                                      |
| Supercontig_1.27_MV<br>LG_03110_9sp   | -892,80677 | -892,52321 | 0,56712 | 0,2469  | NS | 0 |  |  |  |  | hypothetical protein                       | PF03941.8  | INCENP_ARK-bind(Inner centromere protein, ARK binding region)               |
| Supercontig_1.23_MV<br>LG_02791_9sp   | -770,02355 | -769,66614 | 0,71482 | 0,30051 | NS | 0 |  |  |  |  | hypothetical protein                       | PF03372.16 | Exo_endo_phos(Endonuclease/ Exonuclease/phosphatase family)                 |
| Supercontig_1.45_MV<br>LG_04217_9sp   | -694,31407 | -694,31407 | 0       | 0       | NS | 0 |  |  |  |  | hypothetical protein                       | PF04869.7  | Uso1_p115_head(Uso1 / p115 like vesicle tethering protein, head region)     |
| Supercontig_1.109_MV<br>LG_06288_12sp | -362,33118 | -362,33095 | 0,00046 | 0,00023 | NS | 0 |  |  |  |  | hypothetical protein                       | PF00262.11 | Calreticulin(Calreticulin family)                                           |
| Supercontig_1.3_MVL<br>G_00647_9sp    | -779,6316  | -778,84791 | 1,56738 | 0,54328 | NS | 0 |  |  |  |  | hypothetical protein                       | PF02225.15 | PA(PA domain)                                                               |
| Supercontig_1.105_MV<br>LG_06212_6sp  | -622,45617 | -622,2037  | 0,50494 | 0,22312 | NS | 0 |  |  |  |  | hypothetical protein                       | NA         | NA                                                                          |
| Supercontig_1.12_MV<br>LG_01849_9sp   | -513,86306 | -513,4585  | 0,80912 | 0,33273 | NS | 0 |  |  |  |  | hypothetical protein                       | NA         | NA                                                                          |
| Supercontig_1.88_MV<br>LG_05882_11sp  | -374,8828  | -374,88269 | 0,00022 | 0,00011 | NS | 0 |  |  |  |  | hypothetical protein                       | NA         | NA                                                                          |
| Supercontig_1.1_MVL<br>G_00207_6sp    | -873,24365 | -873,24346 | 0,00038 | 0,00019 | NS | 0 |  |  |  |  | poly(A) polymerase                         | PF04926.8  | PAP_RNA-bind(Poly(A) polymerase predicted RNA binding domain)               |
| Supercontig_1.39_MV<br>LG_03833_12sp  | -677,64698 | -677,64666 | 0,00064 | 0,00032 | NS | 0 |  |  |  |  | hypothetical protein                       | PF05091.5  | eIF-3_zeta(Eukaryotic translation initiation factor 3 subunit 7 (eIF-3))    |
| Supercontig_1.61_MV<br>LG_04988_11sp  | -485,45831 | -485,45831 | 0       | 0       | NS | 0 |  |  |  |  | hypothetical protein                       | PF00176.16 | SNF2_N(SNF2 family N-terminal domain)                                       |
| Supercontig_1.12_MV<br>LG_01884_8sp   | -1109,5229 | -1106,9355 | 5,17482 | 0,92479 | *  | 0 |  |  |  |  | hypothetical protein                       | PF02902.12 | Peptidase_C48(Ulp1 protease family, C-terminal catalytic domain)            |
| Supercontig_1.36_MV<br>LG_03690_6sp   | -561,88787 | -561,726   | 0,32374 | 0,14945 | NS | 0 |  |  |  |  | hypothetical protein                       | PF00076.15 | RRM_1(RNA recognition motif. (a.k.a. RRM, RBD, or RNP domain))              |
| Supercontig_1.69_MV<br>LG_05279_9sp   | -604,92758 | -604,92736 | 0,00044 | 0,00022 | NS | 0 |  |  |  |  | hypothetical protein                       | PF00324.14 | AA_permease(Amino acid permease)                                            |
| Supercontig_1.57_MV<br>LG_04803_8sp   | -1163,5585 | -1163,5585 | 0       | 0       | NS | 0 |  |  |  |  | hypothetical protein                       | PF00383.15 | dCMP_cyt_deam_1(Cytidine and deoxycytidylate deaminase zinc-binding region) |

|                                       |            |            |         |         |    |   |  |  |  |  |                            |            |                                                                                 |
|---------------------------------------|------------|------------|---------|---------|----|---|--|--|--|--|----------------------------|------------|---------------------------------------------------------------------------------|
| Supercontig_1.99_MV<br>LG_06123_7sp   | -1154,2896 | -1153,839  | 0,90112 | 0,36273 | NS | 0 |  |  |  |  | hypothetical protein       | PF00270.22 | DEAD(DEAD/DEAH box helicase)                                                    |
| Supercontig_1.154_MV<br>LG_06802_10sp | -489,17057 | -488,96944 | 0,40226 | 0,18219 | NS | 0 |  |  |  |  | hypothetical protein       | PF07479.7  | NAD_Gly3P_dh_C(NAD-dependent glycerol-3-phosphate dehydrogenase C-terminus)     |
| Supercontig_1.16_MV<br>LG_02166_6sp   | -475,82133 | -475,82076 | 0,00114 | 0,00057 | NS | 0 |  |  |  |  | DNA repair protein RAD51   | PF06745.6  | KaiC(KaiC)                                                                      |
| Supercontig_1.109_MV<br>LG_06279_7sp  | -445,34036 | -445,34036 | 0       | 0       | NS | 0 |  |  |  |  | hypothetical protein       | PF04127.8  | DFP(DNA / pantothenate metabolism flavoprotein)                                 |
| Supercontig_1.1_MVL<br>G_00243_11sp   | -910,57211 | -909,60744 | 1,92934 | 0,61889 | NS | 0 |  |  |  |  | hypothetical protein       | NA         | NA                                                                              |
| Supercontig_1.32_MV<br>LG_03443_9sp   | -1158,6225 | -1158,5123 | 0,22048 | 0,10438 | NS | 0 |  |  |  |  | hypothetical protein       | NA         | NA                                                                              |
| Supercontig_1.10_MV<br>LG_01639_8sp   | -998,80825 | -997,71367 | 2,18916 | 0,66532 | NS | 0 |  |  |  |  | hypothetical protein       | PF00270.22 | DEAD(DEAD/DEAH box helicase)                                                    |
| Supercontig_1.1_MVL<br>G_00177_10sp   | -448,13069 | -448,13042 | 0,00054 | 0,00027 | NS | 0 |  |  |  |  | hypothetical protein       | NA         | NA                                                                              |
| Supercontig_1.38_MV<br>LG_03786_10sp  | -396,05531 | -395,96109 | 0,18844 | 0,08992 | NS | 0 |  |  |  |  | hypothetical protein       | PF04032.9  | Rpr2(RNase P Rpr2/Rpp21/SNM1 subunit domain)                                    |
| Supercontig_1.1_MVL<br>G_00257_10sp   | -312,51897 | -312,51897 | 0       | 0       | NS | 0 |  |  |  |  | hypothetical protein       | NA         | NA                                                                              |
| Supercontig_1.28_MV<br>LG_03167_11sp  | -1401,2269 | -1401,2267 | 0,00044 | 0,00022 | NS | 0 |  |  |  |  | hypothetical protein       | PF07817.6  | GLE1(GLE1-like protein)                                                         |
| Supercontig_1.27_MV<br>LG_03105_7sp   | -489,19754 | -488,65723 | 1,08062 | 0,41743 | NS | 0 |  |  |  |  | hypothetical protein       | PF00651.24 | BTB(BTB/POZ domain)                                                             |
| Supercontig_1.35_MV<br>LG_03596_8sp   | -730,5295  | -730,52936 | 0,00028 | 0,00014 | NS | 0 |  |  |  |  | hypothetical protein       | TIGR00111  | TIGR00111(pelota: putative translation factor pelota)                           |
| Supercontig_1.41_MV<br>LG_04013_10sp  | -580,97204 | -580,97202 | 0       | 0       | NS | 0 |  |  |  |  | hypothetical protein       | NA         | NA                                                                              |
| Supercontig_1.19_MV<br>LG_02488_10sp  | -443,76042 | -442,10538 | 3,31008 | 0,80892 | NS | 0 |  |  |  |  | hypothetical protein       | PF04031.6  | Las1(Las1-like)                                                                 |
| Supercontig_1.36_MV<br>LG_03695_10sp  | -296,30547 | -296,30521 | 0,00052 | 0,00026 | NS | 0 |  |  |  |  | pre-mRNA splicing factor   | PF04851.8  | ResIII(Type III restriction enzyme, res subunit)                                |
| Supercontig_1.7_MVL<br>G_01327_10sp   | -385,66117 | -385,66117 | 0       | 0       | NS | 0 |  |  |  |  | hypothetical protein       | PF02826.12 | 2-Hacid_dh_C(D-isomer specific 2-hydroxyacid dehydrogenase, NAD binding domain) |
| Supercontig_1.8_MVL<br>G_01368_11sp   | -866,88558 | -865,94088 | 1,8894  | 0,6112  | NS | 0 |  |  |  |  | hypothetical protein       | PF08598.4  | Sds3(Sds3-like)                                                                 |
| Supercontig_1.39_MV<br>LG_03841_8sp   | -542,00685 | -541,77167 | 0,47036 | 0,20957 | NS | 0 |  |  |  |  | synaptobrevin like YKT6    | PF00957.14 | Synaptobrevin(Synaptobrevin)                                                    |
| Supercontig_1.76_MV<br>LG_05515_7sp   | -489,61573 | -489,61573 | 0       | 0       | NS | 0 |  |  |  |  | hypothetical protein       | NA         | NA                                                                              |
| Supercontig_1.29_MV<br>LG_03228_8sp   | -1006,9495 | -1006,8327 | 0,23342 | 0,11016 | NS | 0 |  |  |  |  | 60S ribosomal protein L4-A | PF00573.15 | Ribosomal_L4(Ribosomal protein L4/L1 family)                                    |
| Supercontig_1.117_MV<br>LG_06396_10sp | -484,29243 | -484,29219 | 0,00048 | 0,00024 | NS | 0 |  |  |  |  | hypothetical protein       | PF00155.14 | Aminotran_1_2(Aminotransferase class I and II)                                  |
| Supercontig_1.22_MV<br>LG_02699_11sp  | -413,17834 | -413,17829 | 0       | 0       | NS | 0 |  |  |  |  | hypothetical protein       | PF00179.19 | UQ_con(Ubiquitin-conjugating enzyme)                                            |

|                                       |            |            |         |         |    |   |  |  |  |  |  |  |                         |            |                                                                          |
|---------------------------------------|------------|------------|---------|---------|----|---|--|--|--|--|--|--|-------------------------|------------|--------------------------------------------------------------------------|
| Supercontig_1.53_MV<br>LG_04644_7sp   | -1115,2522 | -1114,7082 | 1,08798 | 0,41957 | NS | 0 |  |  |  |  |  |  | hypothetical protein    | PF06984.6  | MRP-L47(Mitochondrial 39-S ribosomal protein L47 (MRP-L47))              |
| Supercontig_1.24_MV<br>LG_02907_9sp   | -549,33442 | -548,49116 | 1,68652 | 0,56969 | NS | 0 |  |  |  |  |  |  | hypothetical protein    | PF00860.13 | Xan_ur_permease(Permease family)                                         |
| Supercontig_1.17_MV<br>LG_02269_11sp  | -705,46632 | -705,46632 | 0       | 0       | NS | 0 |  |  |  |  |  |  | hypothetical protein    | PF09949.2  | DUF2183(Uncharacterized conserved protein (DUF2183))                     |
| Supercontig_1.96_MV<br>LG_06048_9sp   | -1855,0633 | -1855,0633 | 0       | 0       | NS | 0 |  |  |  |  |  |  | hypothetical protein    | PF01734.15 | Patatin(Patatin-like phospholipase)                                      |
| Supercontig_1.3_MVL<br>G_00656_10sp   | -828,61079 | -828,61079 | 0       | 0       | NS | 0 |  |  |  |  |  |  | hypothetical protein    | PF06432.4  | GPI2(Phosphatidylinositol N-acetylglucosaminyltransferase)               |
| Supercontig_1.17_MV<br>LG_02310_12sp  | -544,7378  | -544,73771 | 0,00018 | 0       | NS | 0 |  |  |  |  |  |  | hypothetical protein    | TIGR00907  | TIGR00907(2A0304: amino acid permease)                                   |
| Supercontig_1.1_MVL<br>G_00082_8sp    | -306,16351 | -306,15327 | 0,02048 | 0,01019 | NS | 0 |  |  |  |  |  |  | hypothetical protein    | PF00795.15 | CN_hydrolase(Carbon-nitrogen hydrolase)                                  |
| Supercontig_1.18_MV<br>LG_02401_8sp   | -482,52469 | -482,52469 | 0       | 0       | NS | 0 |  |  |  |  |  |  | hypothetical protein    | PF05821.4  | NDUF_B8(NADH-ubiquinone oxidoreductase ASH1 subunit (Cl-ASH1 or NDUFB8)) |
| Supercontig_1.24_MV<br>LG_02881_12sp  | -769,52692 | -769,52692 | 0       | 0       | NS | 0 |  |  |  |  |  |  | glutamate dehydrogenase | PF00208.14 | ELFV_dehydrog(Glutamate/Leucine/Phenylalanine/Valine dehydrogenase)      |
| Supercontig_1.13_MV<br>LG_01900_10sp  | -520,75777 | -520,75754 | 0,00046 | 0,00023 | NS | 0 |  |  |  |  |  |  | hypothetical protein    | PF09725.2  | Fra10Ac1(Folate-sensitive fragile site protein Fra10Ac1)                 |
| Supercontig_1.40_MV<br>LG_03909_7sp   | -550,41137 | -550,02148 | 0,77978 | 0,32287 | NS | 0 |  |  |  |  |  |  | hypothetical protein    | PF04438.9  | zf-HIT(HIT zinc finger)                                                  |
| Supercontig_1.13_MV<br>LG_01912_10sp  | -1236,147  | -1235,0623 | 2,16944 | 0,662   | NS | 0 |  |  |  |  |  |  | hypothetical protein    | NA         | NA                                                                       |
| Supercontig_1.17_MV<br>LG_02315_6sp   | -402,84636 | -402,84636 | 0       | 0       | NS | 0 |  |  |  |  |  |  | hypothetical protein    | PF05546.4  | She9_MDM33(She9 / Mdm33 family)                                          |
| Supercontig_1.67_MV<br>LG_05227_8sp   | -854,9729  | -854,9729  | 0       | 0       | NS | 0 |  |  |  |  |  |  | hypothetical protein    | PF00175.14 | NAD_binding_1(Oxidoreductase NAD-binding domain)                         |
| Supercontig_1.75_MV<br>LG_05494_9sp   | -972,2382  | -972,2382  | 0       | 0       | NS | 0 |  |  |  |  |  |  | hypothetical protein    | PF04857.13 | CAF1(CAF1 family ribonuclease)                                           |
| Supercontig_1.52_MV<br>LG_04579_10sp  | -593,76755 | -593,76754 | 0       | 0       | NS | 0 |  |  |  |  |  |  | hypothetical protein    | PF01852.12 | START(START domain)                                                      |
| Supercontig_1.4_MVL<br>G_00869_11sp   | -674,95502 | -674,25963 | 1,39078 | 0,50112 | NS | 0 |  |  |  |  |  |  | hypothetical protein    | NA         | NA                                                                       |
| Supercontig_1.12_MV<br>LG_01852_10sp  | -354,25799 | -354,25799 | 0       | 0       | NS | 0 |  |  |  |  |  |  | hypothetical protein    | PF00076.15 | RRM_1(RNA recognition motif. (a.k.a. RRM, RBD, or RNP domain))           |
| Supercontig_1.77_MV<br>LG_05562_10sp  | -1192,0828 | -1192,0828 | 0       | 0       | NS | 0 |  |  |  |  |  |  | hypothetical protein    | PF01483.13 | P_proprotein(Proprotein convertase P-domain)                             |
| Supercontig_1.58_MV<br>LG_04878_8sp   | -1113,5625 | -1113,5481 | 0,02874 | 0,01427 | NS | 0 |  |  |  |  |  |  | hypothetical protein    | PF02586.7  | DUF159(Uncharacterised ACR, COG2135)                                     |
| Supercontig_1.140_MV<br>LG_06679_10sp | -792,30288 | -792,30288 | 0       | 0       | NS | 0 |  |  |  |  |  |  | adenosinetriphosphate   | PF00270.22 | DEAD(DEAD/DEAH box helicase)                                             |
| Supercontig_1.4_MVL<br>G_00726_9sp    | -396,41761 | -396,31392 | 0,20738 | 0,0985  | NS | 0 |  |  |  |  |  |  | hypothetical protein    | PF04048.7  | Sec8_exocyst(Sec8 exocyst complex component specific domain)             |



|                                       |            |            |         |         |    |   |   |   |   |   |                                                                 |            |                                                             |
|---------------------------------------|------------|------------|---------|---------|----|---|---|---|---|---|-----------------------------------------------------------------|------------|-------------------------------------------------------------|
| Supercontig_1.15_MV<br>LG_02135_10sp  | -499,30447 | -497,52283 | 3,56328 | 0,83164 | NS | 0 | □ | □ | □ | □ | methionyl-tRNA<br>synthetase                                    | PF09334.4  | tRNA-synt_1g(tRNA synthetases<br>class I (M))               |
| Supercontig_1.111_MV<br>LG_06311_10sp | -1220,4098 | -1219,6523 | 1,51492 | 0,53114 | NS | 0 | □ | □ | □ | □ | hypothetical protein                                            | NA         | NA                                                          |
| Supercontig_1.3_MVL<br>G_00628_10sp   | -684,76627 | -684,7203  | 0,09194 | 0,04493 | NS | 0 | □ | □ | □ | □ | hypothetical protein                                            | NA         | NA                                                          |
| Supercontig_1.112_MV<br>LG_06333_9sp  | -689,47565 | -689,42653 | 0,09824 | 0,04793 | NS | 0 | □ | □ | □ | □ | hypothetical protein                                            | NA         | NA                                                          |
| Supercontig_1.19_MV<br>LG_02437_6sp   | -1429,7247 | -1429,7247 | 0       | 0       | NS | 0 | □ | □ | □ | □ | hypothetical protein                                            | NA         | NA                                                          |
| Supercontig_1.33_MV<br>LG_03480_10sp  | -1086,8969 | -1085,0207 | 3,75242 | 0,84683 | NS | 0 | □ | □ | □ | □ | hypothetical protein                                            | PF08317.4  | Spc7(Spc7 kinetochore protein)                              |
| Supercontig_1.20_MV<br>LG_02545_10sp  | -709,37509 | -708,48046 | 1,78926 | 0,59124 | NS | 0 | □ | □ | □ | □ | hypothetical protein                                            | PF12110.1  | Nup96(Nuclear protein 96)                                   |
| Supercontig_1.2_MVL<br>G_00303_6sp    | -699,97985 | -699,50937 | 0,94096 | 0,3753  | NS | 0 | □ | □ | □ | □ | DNA-directed RNA<br>polymerase I, II, and III<br>subunit RPABC1 | PF01191.12 | RNA_po_Rpb5_C(RNA<br>polymerase Rpb5, C-terminal<br>domain) |
| Supercontig_1.48_MV<br>LG_04383_10sp  | -435,01478 | -433,45133 | 3,1269  | 0,79059 | NS | 0 | □ | □ | □ | □ | NAK protein kinase                                              | PF07714.10 | PKinase_Tyr(Protein tyrosine<br>kinase)                     |
| Supercontig_1.62_MV<br>LG_05038_7sp   | -887,81563 | -887,81563 | 0       | 0       | NS | 0 | □ | □ | □ | □ | hypothetical protein                                            | PF02077.8  | SURF4(SURF4 family)                                         |
| Supercontig_1.7_MVL<br>G_01254_10sp   | -385,07355 | -385,07355 | 0       | 0       | NS | 0 | □ | □ | □ | □ | hypothetical protein                                            | NA         | NA                                                          |
| Supercontig_1.33_MV<br>LG_03494_11sp  | -487,84847 | -486,00107 | 3,6948  | 0,84235 | NS | 0 | □ | □ | □ | □ | hypothetical protein                                            | PF02770.12 | Acyl-CoA_dh_M(Acyl-CoA<br>dehydrogenase, middle domain)     |
| Supercontig_1.64_MV<br>LG_05094_8sp   | -1324,8355 | -1324,8355 | 0       | 0       | NS | 0 | □ | □ | □ | □ | glutaminyl-tRNA<br>synthetase                                   | TIGR00440  | TIGR00440(glnS: glutamine--<br>tRNA ligase)                 |
| Supercontig_1.35_MV<br>LG_03575_6sp   | -598,81298 | -596,55208 | 4,5218  | 0,89574 | NS | 0 | □ | □ | □ | □ | hypothetical protein                                            | NA         | NA                                                          |
| Supercontig_1.34_MV<br>LG_03549_8sp   | -364,22965 | -364,22965 | 0       | 0       | NS | 0 | □ | □ | □ | □ | hypothetical protein                                            | PF06658.5  | DUF1168(Protein of unknown<br>function (DUF1168))           |
| Supercontig_1.8_MVL<br>G_01473_8sp    | -415,33533 | -415,33513 | 0,0004  | 0,0002  | NS | 0 | □ | □ | □ | □ | hypothetical protein                                            | PF00106.18 | adh_short(short chain<br>dehydrogenase)                     |
| Supercontig_1.2_MVL<br>G_00291_6sp    | -904,88795 | -904,88795 | 0       | 0       | NS | 0 | □ | □ | □ | □ | hypothetical protein                                            | PF07173.5  | DUF1399(Protein of unknown<br>function (DUF1399))           |
| Supercontig_1.42_MV<br>LG_04050_7sp   | -755,44432 | -755,30797 | 0,2727  | 0,12746 | NS | 0 | □ | □ | □ | □ | hypothetical protein                                            | PF00675.13 | Peptidase_M16(Insulinase<br>(Peptidase family M16))         |
| Supercontig_1.9_MVL<br>G_01554_9sp    | -478,91599 | -478,27669 | 1,2786  | 0,47234 | NS | 0 | □ | □ | □ | □ | hypothetical protein                                            | PF00227.19 | Proteasome(Proteasome<br>subunit)                           |
| Supercontig_1.2_MVL<br>G_00294_6sp    | -577,10722 | -577,10722 | 0       | 0       | NS | 0 | □ | □ | □ | □ | hypothetical protein                                            | PF03656.6  | Pam16(Pam16)                                                |
| Supercontig_1.6_MVL<br>G_01203_11sp   | -327,21222 | -327,21219 | 0       | 0       | NS | 0 | □ | □ | □ | □ | hypothetical protein                                            | PF00023.23 | Ank(Ankyrin repeat)                                         |
| Supercontig_1.113_MV<br>LG_06348_10sp | -710,68091 | -710,68091 | 0       | 0       | NS | 0 | □ | □ | □ | □ | hypothetical protein                                            | TIGR02962  | TIGR02962(hdxy_isourate:<br>hydroxyisourate hydrolase)      |
| Supercontig_1.91_MV<br>LG_05922_8sp   | -607,28582 | -607,11999 | 0,33166 | 0,15281 | NS | 0 | □ | □ | □ | □ | hypothetical protein                                            | PF07933.7  | DUF1681(Protein of unknown<br>function (DUF1681))           |
| Supercontig_1.55_MV<br>LG_04724_9sp   | -1057,9597 | -1057,9213 | 0,07686 | 0,0377  | NS | 0 | □ | □ | □ | □ | hypothetical protein                                            | PF00856.21 | SET(SET domain)                                             |

|                                      |            |            |         |         |    |   |   |   |   |   |                                                |            |                                                                        |
|--------------------------------------|------------|------------|---------|---------|----|---|---|---|---|---|------------------------------------------------|------------|------------------------------------------------------------------------|
| Supercontig_1.27_MV<br>LG_03080_7sp  | -636,91352 | -636,81201 | 0,20302 | 0,09653 | NS | 0 | 0 | 0 | 0 | 0 | hypothetical protein                           | PF00432.14 | Prenyltrans(Prenyltransferase and squalene oxidase repeat)             |
| Supercontig_1.110_MV<br>LG_06296_9sp | -891,45559 | -890,71461 | 1,48196 | 0,52335 | NS | 0 | 0 | 0 | 0 | 0 | hypothetical protein                           | NA         | NA                                                                     |
| Supercontig_1.20_MV<br>LG_02586_6sp  | -1016,2149 | -1016,2149 | 0       | 0       | NS | 0 | 0 | 0 | 0 | 0 | hypothetical protein                           | PF00581.13 | Rhodanese(Rhodanese-like domain)                                       |
| Supercontig_1.3_MVL<br>G_00632_10sp  | -465,34299 | -465,34299 | 0       | 0       | NS | 0 | 0 | 0 | 0 | 0 | hypothetical protein                           | PF03155.8  | Alg6_Alg8(ALG6, ALG8 glycosyltransferase family)                       |
| Supercontig_1.32_MV<br>LG_03431_12sp | -636,25182 | -636,25182 | 0       | 0       | NS | 0 | 0 | 0 | 0 | 0 | pre-mRNA-splicing factor SYF1                  | NA         | NA                                                                     |
| Supercontig_1.2_MVL<br>G_00396_10sp  | -608,25519 | -608,23993 | 0,03052 | 0,01514 | NS | 0 | 0 | 0 | 0 | 0 | hypothetical protein                           | NA         | NA                                                                     |
| Supercontig_1.2_MVL<br>G_00317_10sp  | -294,16375 | -293,58232 | 1,16286 | 0,4409  | NS | 0 | 0 | 0 | 0 | 0 | hypothetical protein                           | PF12022.1  | DUF3510(Domain of unknown function (DUF3510))                          |
| Supercontig_1.9_MVL<br>G_01544_8sp   | -634,57523 | -634,57523 | 0       | 0       | NS | 0 | 0 | 0 | 0 | 0 | hypothetical protein                           | TIGR00227  | TIGR00227(ribD_Cterm: riboflavin-specific deaminase C-terminal domain) |
| Supercontig_1.14_MV<br>LG_02024_11sp | -797,8933  | -797,8931  | 0,0004  | 0,0002  | NS | 0 | 0 | 0 | 0 | 0 | hypothetical protein                           | NA         | NA                                                                     |
| Supercontig_1.63_MV<br>LG_05063_8sp  | -753,45252 | -753,45252 | 0       | 0       | NS | 0 | 0 | 0 | 0 | 0 | hypothetical protein                           | PF01480.10 | PWI(PWI domain)                                                        |
| Supercontig_1.20_MV<br>LG_02605_9sp  | -356,18511 | -355,87239 | 0,62544 | 0,26855 | NS | 0 | 0 | 0 | 0 | 0 | actin-like protein 2/3 complex subunit 2       | PF04045.7  | P34-Arc(Arp2/3 complex, 34 kD subunit p34-Arc)                         |
| Supercontig_1.3_MVL<br>G_00519_12sp  | -426,1447  | -426,14469 | 0       | 0       | NS | 0 | 0 | 0 | 0 | 0 | hypothetical protein                           | PF01798.11 | Nop(Putative snoRNA binding domain)                                    |
| Supercontig_1.38_MV<br>LG_03790_10sp | -742,21611 | -742,20649 | 0,01924 | 0,00957 | NS | 0 | 0 | 0 | 0 | 0 | hypothetical protein                           | NA         | NA                                                                     |
| Supercontig_1.39_MV<br>LG_03896_7sp  | -449,44318 | -448,58179 | 1,72278 | 0,57743 | NS | 0 | 0 | 0 | 0 | 0 | hypothetical protein                           | PF11221.1  | Med21(Subunit 21 of Mediator complex)                                  |
| Supercontig_1.81_MV<br>LG_05694_12sp | -1154,8183 | -1152,8977 | 3,84116 | 0,85348 | NS | 0 | 0 | 0 | 0 | 0 | hypothetical protein                           | PF01778.10 | Ribosomal_L28e(Ribosomal L28e protein family)                          |
| Supercontig_1.4_MVL<br>G_00707_6sp   | -495,56939 | -495,56909 | 0,0006  | 0,0003  | NS | 0 | 0 | 0 | 0 | 0 | secretory pathway GDP dissociation inhibitor 1 | PF00996.11 | GDI(GDP dissociation inhibitor)                                        |
| Supercontig_1.57_MV<br>LG_04818_12sp | -695,77431 | -695,77431 | 0       | 0       | NS | 0 | 0 | 0 | 0 | 0 | hypothetical protein                           | NA         | NA                                                                     |
| Supercontig_1.2_MVL<br>G_00480_9sp   | -350,93444 | -350,93015 | 0,00858 | 0,00428 | NS | 0 | 0 | 0 | 0 | 0 | hypothetical protein                           | NA         | NA                                                                     |
| Supercontig_1.2_MVL<br>G_00457_8sp   | -544,77332 | -544,77332 | 0       | 0       | NS | 0 | 0 | 0 | 0 | 0 | hypothetical protein                           | NA         | NA                                                                     |
| Supercontig_1.40_MV<br>LG_03963_8sp  | -703,17494 | -703,17486 | 0,00016 | 0       | NS | 0 | 0 | 0 | 0 | 0 | hypothetical protein                           | PF00268.14 | Ribonuc_red_sm(Ribonucleotide reductase, small chain)                  |
| Supercontig_1.55_MV<br>LG_04717_7sp  | -232,01078 | -232,01078 | 0       | 0       | NS | 0 | 0 | 0 | 0 | 0 | small nuclear ribonucleoprotein F              | PF01423.15 | LSM(LSM domain)                                                        |
| Supercontig_1.109_MV<br>LG_06280_8sp | -628,47031 | -628,47031 | 0       | 0       | NS | 0 | 0 | 0 | 0 | 0 | hypothetical protein                           | NA         | NA                                                                     |
| Supercontig_1.76_MV<br>LG_05528_7sp  | -550,74922 | -548,74927 | 3,9999  | 0,86466 | NS | 0 | 0 | 0 | 0 | 0 | hypothetical protein                           | NA         | NA                                                                     |
| Supercontig_1.3_MVL<br>G_00556_10sp  | -539,77133 | -539,77133 | 0       | 0       | NS | 0 | 0 | 0 | 0 | 0 | hypothetical protein                           | TIGR00879  | TIGR00879(SP: MFS transporter, sugar porter (SP) family)               |

|                                       |            |            |         |         |    |   |  |  |  |  |                                |            |                                                                 |
|---------------------------------------|------------|------------|---------|---------|----|---|--|--|--|--|--------------------------------|------------|-----------------------------------------------------------------|
| Supercontig_1.62_MV<br>LG_05031_7sp   | -388,27753 | -388,27734 | 0,00038 | 0,00019 | NS | 0 |  |  |  |  | hypothetical protein           | PF11705.1  | RNA_pol_3_Rpc31(DNA-directed RNA polymerase III subunit Rpc31)  |
| Supercontig_1.3_MVL<br>G_00610_10sp   | -1639,162  | -1639,162  | 0       | 0       | NS | 0 |  |  |  |  | hypothetical protein           | PF09444.3  | MRC1(MRC1-like domain)                                          |
| Supercontig_1.93_MV<br>LG_05973_11sp  | -795,56409 | -793,48928 | 4,14962 | 0,87442 | NS | 0 |  |  |  |  | hypothetical protein           | PF00328.15 | Acid_phosphat_A(Histidine acid phosphatase)                     |
| Supercontig_1.19_MV<br>LG_02476_10sp  | -819,9366  | -819,26757 | 1,33806 | 0,48779 | NS | 0 |  |  |  |  | hypothetical protein           | PF01853.11 | MOZ_SAS(MOZ/SAS family)                                         |
| Supercontig_1.197_MV<br>LG_07070_6sp  | -483,80992 | -483,78717 | 0,0455  | 0,02249 | NS | 0 |  |  |  |  | hypothetical protein           | PF00929.17 | Exonuc_X-T(Exonuclease)                                         |
| Supercontig_1.91_MV<br>LG_05934_8sp   | -700,89122 | -700,89122 | 0       | 0       | NS | 0 |  |  |  |  | hypothetical protein           | PF00326.14 | Peptidase_S9(Prolyl oligopeptidase family)                      |
| Supercontig_1.53_MV<br>LG_04640_10sp  | -281,82469 | -281,82466 | 0       | 0       | NS | 0 |  |  |  |  | hypothetical protein           | PF00132.17 | Hexapep(Bacterial transferase hexapeptide (three repeats))      |
| Supercontig_1.4_MVL<br>G_00849_10sp   | -614,05663 | -614,05663 | 0       | 0       | NS | 0 |  |  |  |  | hypothetical protein           | PF01501.13 | Glyco_transf_8(Glycosyl transferase family 8)                   |
| Supercontig_1.12_MV<br>LG_01804_9sp   | -405,95442 | -405,75218 | 0,40448 | 0,1831  | NS | 0 |  |  |  |  | STE/STE11/CDC15 protein kinase | PF07714.10 | Pkinase_Tyr(Protein tyrosine kinase)                            |
| Supercontig_1.15_MV<br>LG_02119_8sp   | -1052,8553 | -1052,8553 | 0       | 0       | NS | 0 |  |  |  |  | hypothetical protein           | PF00083.17 | Sugar_tr(Sugar (and other) transporter)                         |
| Supercontig_1.38_MV<br>LG_03815_6sp   | -288,22495 | -288,22478 | 0,00034 | 0,00017 | NS | 0 |  |  |  |  | Ras-like protein Rab-11B       | PF08477.6  | Miro(Miro-like protein)                                         |
| Supercontig_1.22_MV<br>LG_02727_7sp   | -767,00069 | -767,00069 | 0       | 0       | NS | 0 |  |  |  |  | hypothetical protein           | NA         | NA                                                              |
| Supercontig_1.4_MVL<br>G_00724_6sp    | -1150,9307 | -1150,9307 | 0       | 0       | NS | 0 |  |  |  |  | hypothetical protein           | PF00809.15 | Pterin_bind(Pterin binding enzyme)                              |
| Supercontig_1.122_MV<br>LG_06455_11sp | -845,50767 | -845,50767 | 0       | 0       | NS | 0 |  |  |  |  | hypothetical protein           | NA         | NA                                                              |
| Supercontig_1.18_MV<br>LG_02382_10sp  | -360,14538 | -359,71045 | 0,86986 | 0,35269 | NS | 0 |  |  |  |  | hypothetical protein           | PF00828.12 | Ribosomal_L18e(Ribosomal protein L18e/L15)                      |
| Supercontig_1.4_MVL<br>G_00827_9sp    | -633,87284 | -633,87218 | 0,00132 | 0,00066 | NS | 0 |  |  |  |  | splicing factor 3B subunit 1   | PF02985.15 | HEAT(HEAT repeat)                                               |
| Supercontig_1.45_MV<br>LG_04207_10sp  | -863,75402 | -862,9835  | 1,54104 | 0,53723 | NS | 0 |  |  |  |  | hypothetical protein           | NA         | NA                                                              |
| Supercontig_1.40_MV<br>LG_03962_10sp  | -1686,2906 | -1686,2906 | 0       | 0       | NS | 0 |  |  |  |  | hypothetical protein           | PF00481.14 | PP2C(Protein phosphatase 2C)                                    |
| Supercontig_1.163_MV<br>LG_06884_8sp  | -498,22517 | -498,21401 | 0,02232 | 0,0111  | NS | 0 |  |  |  |  | hypothetical protein           | NA         | NA                                                              |
| Supercontig_1.28_MV<br>LG_03185_8sp   | -419,51678 | -419,50501 | 0,02354 | 0,0117  | NS | 0 |  |  |  |  | hypothetical protein           | PF03467.8  | Smg4_UPF3(Smg-4/UPF3 family)                                    |
| Supercontig_1.11_MV<br>LG_01783_6sp   | -766,07232 | -764,28298 | 3,57868 | 0,83293 | NS | 0 |  |  |  |  | hypothetical protein           | NA         | NA                                                              |
| Supercontig_1.63_MV<br>LG_05086_9sp   | -605,10789 | -605,10789 | 0       | 0       | NS | 0 |  |  |  |  | hypothetical protein           | NA         | NA                                                              |
| Supercontig_1.5_MVL<br>G_01029_8sp    | -520,41486 | -520,41486 | 0       | 0       | NS | 0 |  |  |  |  | hypothetical protein           | PF02338.12 | OTU(OTU-like cysteine protease)                                 |
| Supercontig_1.8_MVL<br>G_01433_11sp   | -275,25417 | -275,25385 | 0,00064 | 0,00032 | NS | 0 |  |  |  |  | hypothetical protein           | PF04098.8  | Rad52_Rad22(Rad52/22 family double-strand break repair protein) |

|                                      |            |            |         |         |    |   |   |   |   |   |                                      |            |                                                                  |
|--------------------------------------|------------|------------|---------|---------|----|---|---|---|---|---|--------------------------------------|------------|------------------------------------------------------------------|
| Supercontig_1.98_MV<br>LG_06087_8sp  | -573,8633  | -573,85758 | 0,01144 | 0,0057  | NS | 0 | 0 | 0 | 0 | 0 | hypothetical protein                 | PF02656.8  | DUF202(Domain of unknown function DUF)                           |
| Supercontig_1.278_MV<br>LG_07229_6sp | -638,93686 | -638,01708 | 1,83956 | 0,60139 | NS | 0 | 0 | 0 | 0 | 0 | hypothetical protein                 | PF03583.7  | LIP(Secretory lipase)                                            |
| Supercontig_1.3_MVL<br>G_00506_10sp  | -935,54888 | -935,54888 | 0       | 0       | NS | 0 | 0 | 0 | 0 | 0 | hypothetical protein                 | PF01055.19 | Glyco_hydro_31(Glycosyl hydrolases family 31)                    |
| Supercontig_1.22_MV<br>LG_02720_11sp | -519,4332  | -519,4332  | 0       | 0       | NS | 0 | 0 | 0 | 0 | 0 | hypothetical protein                 | PF00226.24 | DnaJ(DnaJ domain)                                                |
| Supercontig_1.15_MV<br>LG_02101_7sp  | -984,14195 | -983,81118 | 0,66154 | 0,28163 | NS | 0 | 0 | 0 | 0 | 0 | CAMK/CAMKL protein kinase            | PF07714.10 | Pkinase_Tyr(Protein tyrosine kinase)                             |
| Supercontig_1.11_MV<br>LG_01721_7sp  | -598,58583 | -598,58583 | 0       | 0       | NS | 0 | 0 | 0 | 0 | 0 | hypothetical protein                 | PF01472.13 | PUA(PUA domain)                                                  |
| Supercontig_1.20_MV<br>LG_02580_6sp  | -1181,6166 | -1181,6098 | 0,01358 | 0,00677 | NS | 0 | 0 | 0 | 0 | 0 | hypothetical protein                 | NA         | NA                                                               |
| Supercontig_1.41_MV<br>LG_04000_10sp | -405,35559 | -405,35538 | 0,00042 | 0,00021 | NS | 0 | 0 | 0 | 0 | 0 | STE/STE20/FRAY protein kinase        | PF07714.10 | Pkinase_Tyr(Protein tyrosine kinase)                             |
| Supercontig_1.82_MV<br>LG_05715_7sp  | -812,78488 | -812,75954 | 0,05068 | 0,02502 | NS | 0 | 0 | 0 | 0 | 0 | hypothetical protein                 | PF08045.4  | CDC14(Cell division control protein 14, SIN component)           |
| Supercontig_1.42_MV<br>LG_04041_8sp  | -1358,3676 | -1357,821  | 1,0932  | 0,42109 | NS | 0 | 0 | 0 | 0 | 0 | hypothetical protein                 | PF05172.6  | MPPN(MPPN (rrm-like) domain)                                     |
| Supercontig_1.59_MV<br>LG_04893_11sp | -439,88582 | -439,64049 | 0,49066 | 0,21755 | NS | 0 | 0 | 0 | 0 | 0 | hypothetical protein                 | PF04597.7  | Ribophorin_I(Ribophorin I)                                       |
| Supercontig_1.13_MV<br>LG_01966_10sp | -947,83984 | -946,93935 | 1,80098 | 0,59363 | NS | 0 | 0 | 0 | 0 | 0 | hypothetical protein                 | PF00293.21 | NUDIX(NUDIX domain)                                              |
| Supercontig_1.203_MV<br>LG_07101_6sp | -576,89568 | -576,89537 | 0,00062 | 0,00031 | NS | 0 | 0 | 0 | 0 | 0 | ribonucleoprotein-associated protein | PF01248.19 | Ribosomal_L7Ae(Ribosomal protein L7Ae/L30e/S12e/Gadd45 family)   |
| Supercontig_1.15_MV<br>LG_02121_8sp  | -356,42304 | -356,42298 | 0,00012 | 0       | NS | 0 | 0 | 0 | 0 | 0 | hypothetical protein                 | NA         | NA                                                               |
| Supercontig_1.17_MV<br>LG_02324_7sp  | -595,25914 | -594,90546 | 0,70736 | 0,2979  | NS | 0 | 0 | 0 | 0 | 0 | hypothetical protein                 | PF01180.14 | DHO_dh(Dihydroorotate dehydrogenase)                             |
| Supercontig_1.4_MVL<br>G_00814_9sp   | -537,15744 | -537,15744 | 0       | 0       | NS | 0 | 0 | 0 | 0 | 0 | hypothetical protein                 | NA         | NA                                                               |
| Supercontig_1.22_MV<br>LG_02716_7sp  | -845,64003 | -845,64003 | 0       | 0       | NS | 0 | 0 | 0 | 0 | 0 | glycine cleavage system H protein    | TIGR00527  | TIGR00527(gcvH: glycine cleavage system H protein)               |
| Supercontig_1.24_MV<br>LG_02854_10sp | -665,65872 | -665,63138 | 0,05468 | 0,02697 | NS | 0 | 0 | 0 | 0 | 0 | hypothetical protein                 | PF00076.15 | RRM_1(RNA recognition motif. (a.k.a. RRM, RBD, or RNP domain))   |
| Supercontig_1.202_MV<br>LG_07088_9sp | -726,42337 | -724,61684 | 3,61306 | 0,83578 | NS | 0 | 0 | 0 | 0 | 0 | hypothetical protein                 | PF08597.3  | eIF3_subunit(Translation initiation factor eIF3 subunit)         |
| Supercontig_1.65_MV<br>LG_05145_10sp | -489,92617 | -489,92617 | 0       | 0       | NS | 0 | 0 | 0 | 0 | 0 | hypothetical protein                 | PF10294.2  | Methyltransf_16(Putative methyltransferase)                      |
| Supercontig_1.7_MVL<br>G_01308_9sp   | -349,66215 | -349,66215 | 0       | 0       | NS | 0 | 0 | 0 | 0 | 0 | hypothetical protein                 | PF00067.15 | p450(Cytochrome P450)                                            |
| Supercontig_1.155_MV<br>LG_06821_7sp | -839,53378 | -839,20069 | 0,66618 | 0,28329 | NS | 0 | 0 | 0 | 0 | 0 | hypothetical protein                 | PF01793.9  | Glyco_transf_15(Glycolipid 2-alpha-mannosyltransferase)          |
| Supercontig_1.56_MV<br>LG_04788_8sp  | -614,46062 | -614,46031 | 0,00062 | 0,00031 | NS | 0 | 0 | 0 | 0 | 0 | adenosylhomocysteina se              | TIGR00936  | TIGR00936(ahcY: adenosylhomocysteina se)                         |
| Supercontig_1.109_MV<br>LG_06283_8sp | -621,96647 | -621,10495 | 1,72304 | 0,57748 | NS | 0 | 0 | 0 | 0 | 0 | hypothetical protein                 | PF10000.2  | DUF2241(Uncharacterized protein conserved in bacteria (DUF2241)) |

|                                       |            |            |         |         |    |   |   |   |   |   |   |   |   |   |   |   |   |   |   |   |                                            |            |                                                                          |
|---------------------------------------|------------|------------|---------|---------|----|---|---|---|---|---|---|---|---|---|---|---|---|---|---|---|--------------------------------------------|------------|--------------------------------------------------------------------------|
| Supercontig_1.109_MV<br>LG_06287_11sp | -382,34031 | -382,34031 | 0       | 0       | NS | 0 | 0 | 0 | 0 | 0 | 0 | 0 | 0 | 0 | 0 | 0 | 0 | 0 | 0 | 0 | YjeF                                       | TIGR00197  | TIGR00197(yjeF_nterm: YjeF homolog, N-terminus)                          |
| Supercontig_1.121_MV<br>LG_06444_10sp | -731,42994 | -731,19367 | 0,47254 | 0,21043 | NS | 0 | 0 | 0 | 0 | 0 | 0 | 0 | 0 | 0 | 0 | 0 | 0 | 0 | 0 | 0 | hypothetical protein                       | PF05739.12 | SNARE(SNARE domain)                                                      |
| Supercontig_1.8_MVL<br>G_01451_10sp   | -575,54166 | -575,54161 | 0       | 0       | NS | 0 | 0 | 0 | 0 | 0 | 0 | 0 | 0 | 0 | 0 | 0 | 0 | 0 | 0 | 0 | hypothetical protein                       | PF03547.11 | Mem_trans(Membrane transport protein)                                    |
| Supercontig_1.97_MV<br>LG_06057_6sp   | -331,54832 | -331,54806 | 0,00052 | 0,00026 | NS | 0 | 0 | 0 | 0 | 0 | 0 | 0 | 0 | 0 | 0 | 0 | 0 | 0 | 0 | 0 | peptidyl-prolyl cis-trans isomerase-like 3 | PF00160.14 | Pro_isomerase(Cyclophilin type peptidyl-prolyl cis-trans isomerase/CLD)  |
| Supercontig_1.107_MV<br>LG_06258_10sp | -606,44103 | -606,26354 | 0,35498 | 0,16263 | NS | 0 | 0 | 0 | 0 | 0 | 0 | 0 | 0 | 0 | 0 | 0 | 0 | 0 | 0 | 0 | hypothetical protein                       | NA         | NA                                                                       |
| Supercontig_1.1_MVL<br>G_00171_9sp    | -483,85178 | -483,85161 | 0,00034 | 0,00017 | NS | 0 | 0 | 0 | 0 | 0 | 0 | 0 | 0 | 0 | 0 | 0 | 0 | 0 | 0 | 0 | hypothetical protein                       | PF01613.11 | Flavin_Reduct(Flavin reductase like domain)                              |
| Supercontig_1.6_MVL<br>G_01137_8sp    | -1263,6181 | -1262,9573 | 1,3217  | 0,48359 | NS | 0 | 0 | 0 | 0 | 0 | 0 | 0 | 0 | 0 | 0 | 0 | 0 | 0 | 0 | 0 | hypothetical protein                       | NA         | NA                                                                       |
| Supercontig_1.58_MV<br>LG_04843_10sp  | -570,14296 | -570,14296 | 0       | 0       | NS | 0 | 0 | 0 | 0 | 0 | 0 | 0 | 0 | 0 | 0 | 0 | 0 | 0 | 0 | 0 | hypothetical protein                       | PF06419.4  | COG6(Conserved oligomeric complex COG6)                                  |
| Supercontig_1.38_MV<br>LG_03823_8sp   | -420,49787 | -420,49787 | 0       | 0       | NS | 0 | 0 | 0 | 0 | 0 | 0 | 0 | 0 | 0 | 0 | 0 | 0 | 0 | 0 | 0 | hypothetical protein                       | PF00106.18 | adh_short(short chain dehydrogenase)                                     |
| Supercontig_1.77_MV<br>LG_05552_10sp  | -672,23723 | -672,23723 | 0       | 0       | NS | 0 | 0 | 0 | 0 | 0 | 0 | 0 | 0 | 0 | 0 | 0 | 0 | 0 | 0 | 0 | hypothetical protein                       | NA         | NA                                                                       |
| Supercontig_1.35_MV<br>LG_03610_10sp  | -316,40438 | -316,40438 | 0       | 0       | NS | 0 | 0 | 0 | 0 | 0 | 0 | 0 | 0 | 0 | 0 | 0 | 0 | 0 | 0 | 0 | hypothetical protein                       | PF00614.15 | PLDc(Phospholipase D Active site motif)                                  |
| Supercontig_1.26_MV<br>LG_03020_12sp  | -298,17865 | -298,11754 | 0,12222 | 0,05928 | NS | 0 | 0 | 0 | 0 | 0 | 0 | 0 | 0 | 0 | 0 | 0 | 0 | 0 | 0 | 0 | hypothetical protein                       | PF00400.25 | WD40(WD domain, G-beta repeat)                                           |
| Supercontig_1.40_MV<br>LG_03946_6sp   | -804,71836 | -804,61016 | 0,2164  | 0,10255 | NS | 0 | 0 | 0 | 0 | 0 | 0 | 0 | 0 | 0 | 0 | 0 | 0 | 0 | 0 | 0 | hypothetical protein                       | PF03987.8  | Autophagy_act_C(Autophagocytosis associated protein, active-site domain) |
| Supercontig_1.113_MV<br>LG_06343_10sp | -846,38539 | -845,97959 | 0,8116  | 0,33356 | NS | 0 | 0 | 0 | 0 | 0 | 0 | 0 | 0 | 0 | 0 | 0 | 0 | 0 | 0 | 0 | hypothetical protein                       | PF00173.21 | Cyt-b5(Cytochrome b5-like Heme/Steroid binding domain)                   |
| Supercontig_1.5_MVL<br>G_00943_12sp   | -373,97984 | -373,9797  | 0,00028 | 0,00014 | NS | 0 | 0 | 0 | 0 | 0 | 0 | 0 | 0 | 0 | 0 | 0 | 0 | 0 | 0 | 0 | hypothetical protein                       | NA         | NA                                                                       |
| Supercontig_1.22_MV<br>LG_02710_6sp   | -505,30962 | -505,12564 | 0,36796 | 0,16805 | NS | 0 | 0 | 0 | 0 | 0 | 0 | 0 | 0 | 0 | 0 | 0 | 0 | 0 | 0 | 0 | hypothetical protein                       | PF04144.6  | SCAMP(SCAMP family)                                                      |
| Supercontig_1.28_MV<br>LG_03171_6sp   | -1236,098  | -1236,0951 | 0,0058  | 0,0029  | NS | 0 | 0 | 0 | 0 | 0 | 0 | 0 | 0 | 0 | 0 | 0 | 0 | 0 | 0 | 0 | hypothetical protein                       | PF02148.12 | zf-UBP(Zn-finger in ubiquitin-hydrolases and other protein)              |
| Supercontig_1.87_MV<br>LG_05866_11sp  | -296,86329 | -296,8632  | 0,00018 | 0       | NS | 0 | 0 | 0 | 0 | 0 | 0 | 0 | 0 | 0 | 0 | 0 | 0 | 0 | 0 | 0 | hypothetical protein                       | PF01553.14 | Acyltransferase(Acyltransferase)                                         |
| Supercontig_1.98_MV<br>LG_06085_10sp  | -347,92932 | -347,92897 | 0,0007  | 0,00035 | NS | 0 | 0 | 0 | 0 | 0 | 0 | 0 | 0 | 0 | 0 | 0 | 0 | 0 | 0 | 0 | hypothetical protein                       | PF00063.14 | Myosin_head(Myosin head (motor domain))                                  |
| Supercontig_1.47_MV<br>LG_04324_8sp   | -733,70826 | -733,50191 | 0,4127  | 0,18645 | NS | 0 | 0 | 0 | 0 | 0 | 0 | 0 | 0 | 0 | 0 | 0 | 0 | 0 | 0 | 0 | hypothetical protein                       | NA         | NA                                                                       |
| Supercontig_1.21_MV<br>LG_02639_9sp   | -338,55587 | -338,55587 | 0       | 0       | NS | 0 | 0 | 0 | 0 | 0 | 0 | 0 | 0 | 0 | 0 | 0 | 0 | 0 | 0 | 0 | hypothetical protein                       | PF01852.12 | START(START domain)                                                      |
| Supercontig_1.42_MV<br>LG_04085_8sp   | -575,20926 | -575,20922 | 0       | 0       | NS | 0 | 0 | 0 | 0 | 0 | 0 | 0 | 0 | 0 | 0 | 0 | 0 | 0 | 0 | 0 | hypothetical protein                       | NA         | NA                                                                       |
| Supercontig_1.25_MV<br>LG_02973_7sp   | -322,46628 | -322,4662  | 0,00016 | 0       | NS | 0 | 0 | 0 | 0 | 0 | 0 | 0 | 0 | 0 | 0 | 0 | 0 | 0 | 0 | 0 | hypothetical protein                       | PF03095.8  | PTPA(Phosphotyrosyl phosphate activator (PTPA) protein)                  |
| Supercontig_1.46_MV<br>LG_04265_6sp   | -436,1308  | -434,90071 | 2,46018 | 0,70773 | NS | 0 | 0 | 0 | 0 | 0 | 0 | 0 | 0 | 0 | 0 | 0 | 0 | 0 | 0 | 0 | hypothetical protein                       | NA         | NA                                                                       |



|                                      |            |            |         |         |    |   |  |  |  |                                                   |            |                                                                     |
|--------------------------------------|------------|------------|---------|---------|----|---|--|--|--|---------------------------------------------------|------------|---------------------------------------------------------------------|
| Supercontig_1.32_MV<br>LG_03402_9sp  | -1091,0217 | -1090,9269 | 0,1896  | 0,09045 | NS | 0 |  |  |  | hypothetical protein                              | NA         | NA                                                                  |
| Supercontig_1.98_MV<br>LG_06094_8sp  | -470,47701 | -470,20498 | 0,54406 | 0,23817 | NS | 0 |  |  |  | hypothetical protein                              | PF08616.3  | SPB_interacting(Spindle pole body interacting protein)              |
| Supercontig_1.30_MV<br>LG_03313_10sp | -1101,3136 | -1100,9249 | 0,77732 | 0,32204 | NS | 0 |  |  |  | hypothetical protein                              | PF08552.4  | Kei1(Inositolphosphorylceramide synthase subunit Kei1)              |
| Supercontig_1.53_MV<br>LG_04608_11sp | -444,47294 | -444,47252 | 0,00084 | 0,00042 | NS | 0 |  |  |  | small nuclear ribonucleoprotein Sm D2             | PF01423.15 | LSM(LSM domain)                                                     |
| Supercontig_1.33_MV<br>LG_03460_9sp  | -373,89763 | -373,89761 | 0       | 0       | NS | 0 |  |  |  | hypothetical protein                              | PF00022.12 | Actin(Actin)                                                        |
| Supercontig_1.60_MV<br>LG_04928_8sp  | -973,864   | -973,864   | 0       | 0       | NS | 0 |  |  |  | hypothetical protein                              | NA         | NA                                                                  |
| Supercontig_1.51_MV<br>LG_04535_9sp  | -423,48449 | -423,48449 | 0       | 0       | NS | 0 |  |  |  | hypothetical protein                              | PF05046.7  | Img2(Mitochondrial large subunit ribosomal protein (Img2))          |
| Supercontig_1.31_MV<br>LG_03343_9sp  | -957,18399 | -957,18399 | 0       | 0       | NS | 0 |  |  |  | hypothetical protein                              | PF02885.10 | Glycos_trans_3N(Glycosyl transferase family, helical bundle domain) |
| Supercontig_1.64_MV<br>LG_05096_7sp  | -773,97934 | -773,97934 | 0       | 0       | NS | 0 |  |  |  | hypothetical protein                              | PF00173.21 | Cyt-b5(Cytochrome b5-like Heme/Steroid binding domain)              |
| Supercontig_1.38_MV<br>LG_03825_7sp  | -1103,0435 | -1103,0435 | 0       | 0       | NS | 0 |  |  |  | hypothetical protein                              | PF00400.25 | WD40(WD domain, G-beta repeat)                                      |
| Supercontig_1.220_MV<br>LG_07160_9sp | -589,62649 | -589,62649 | 0       | 0       | NS | 0 |  |  |  | hypothetical protein                              | PF02731.8  | SKIP_SNW(SKIP/SNW domain)                                           |
| Supercontig_1.102_MV<br>LG_06181_7sp | -805,57569 | -805,57569 | 0       | 0       | NS | 0 |  |  |  | hypothetical protein                              | NA         | NA                                                                  |
| Supercontig_1.22_MV<br>LG_02701_8sp  | -311,55661 | -310,8787  | 1,35582 | 0,49232 | NS | 0 |  |  |  | hypothetical protein                              | PF01066.14 | CDP-OH_P_transf(CDP-alcohol phosphatidyltransferase)                |
| Supercontig_1.21_MV<br>LG_02660_10sp | -522,71578 | -522,71851 | 0       | 0       | NS | 0 |  |  |  | glucosamine-fructose-6-phosphate aminotransferase | PF01380.15 | SIS(SIS domain)                                                     |
| Supercontig_1.4_MVL<br>G_00761_8sp   | -862,63306 | -862,63306 | 0       | 0       | NS | 0 |  |  |  | hypothetical protein                              | PF01553.14 | Acyltransferase(Acyltransferase)                                    |
| Supercontig_1.2_MVL<br>G_00374_10sp  | -401,8253  | -401,82525 | 0,0001  | 0       | NS | 0 |  |  |  | hypothetical protein                              | PF00097.18 | zf-C3HC4(Zinc finger, C3HC4 type (RING finger))                     |
| Supercontig_1.11_MV<br>LG_01723_10sp | -344,46128 | -344,46114 | 0,00028 | 0,00014 | NS | 0 |  |  |  | hypothetical protein                              | PF10255.2  | Paf67(RNA polymerase I-associated factor PAF67)                     |
| Supercontig_1.79_MV<br>LG_05606_6sp  | -767,66209 | -767,12642 | 1,07134 | 0,41472 | NS | 0 |  |  |  | hypothetical protein                              | NA         | NA                                                                  |
| Supercontig_1.34_MV<br>LG_03508_9sp  | -467,92145 | -467,92145 | 0       | 0       | NS | 0 |  |  |  | hypothetical protein                              | PF00400.25 | WD40(WD domain, G-beta repeat)                                      |
| Supercontig_1.4_MVL<br>G_00690_6sp   | -512,49736 | -511,59626 | 1,8022  | 0,59388 | NS | 0 |  |  |  | hypothetical protein                              | NA         | NA                                                                  |
| Supercontig_1.211_MV<br>LG_07126_8sp | -437,9729  | -437,97277 | 0,00026 | 0,00013 | NS | 0 |  |  |  | AP-1 complex subunit sigma-1                      | PF01217.13 | Clat_adaptor_s(Clathrin adaptor complex small chain)                |
| Supercontig_1.18_MV<br>LG_02391_11sp | -544,4672  | -544,46712 | 0,00016 | 0       | NS | 0 |  |  |  | adenylosuccinate lyase                            | PF10397.2  | ADSL_C(Adenylosuccinate lyase C-terminus)                           |
| Supercontig_1.67_MV<br>LG_05199_7sp  | -862,58271 | -862,58271 | 0       | 0       | NS | 0 |  |  |  | hypothetical protein                              | NA         | NA                                                                  |

|                                       |            |            |         |         |    |   |   |   |   |   |                      |            |                                                                           |
|---------------------------------------|------------|------------|---------|---------|----|---|---|---|---|---|----------------------|------------|---------------------------------------------------------------------------|
| Supercontig_1.7_MVL<br>G_01281_8sp    | -854,63368 | -854,63349 | 0,00038 | 0,00019 | NS | 0 | □ | □ | □ | □ | hypothetical protein | NA         | NA                                                                        |
| Supercontig_1.11_MV<br>LG_01716_7sp   | -707,37777 | -707,18405 | 0,38744 | 0,17611 | NS | 0 | □ | □ | □ | □ | hypothetical protein | PF11699.1  | Mif2(Mif2/CENP-C like)                                                    |
| Supercontig_1.78_MV<br>LG_05594_7sp   | -456,39996 | -456,06878 | 0,66236 | 0,28192 | NS | 0 | □ | □ | □ | □ | hypothetical protein | NA         | NA                                                                        |
| Supercontig_1.1_MVL<br>G_00109_9sp    | -299,64149 | -298,11487 | 3,05324 | 0,78273 | NS | 0 | □ | □ | □ | □ | hypothetical protein | PF05730.4  | CFEM(CFEM domain)                                                         |
| Supercontig_1.44_MV<br>LG_04178_9sp   | -811,63934 | -811,29633 | 0,68602 | 0,29037 | NS | 0 | □ | □ | □ | □ | hypothetical protein | PF01490.11 | Aa_trans(Transmembrane amino acid transporter protein)                    |
| Supercontig_1.40_MV<br>LG_03910_11sp  | -335,63809 | -335,63809 | 0       | 0       | NS | 0 | □ | □ | □ | □ | hypothetical protein | PF04670.5  | Gtr1_RagA(Gtr1/RagA G protein conserved region)                           |
| Supercontig_1.5_MVL<br>G_01045_10sp   | -641,99135 | -641,92084 | 0,14102 | 0,06808 | NS | 0 | □ | □ | □ | □ | hypothetical protein | PF04406.7  | TP6A_N(Type IIB DNA topoisomerase)                                        |
| Supercontig_1.28_MV<br>LG_03151_7sp   | -520,86885 | -520,86871 | 0,00028 | 0,00014 | NS | 0 | □ | □ | □ | □ | hypothetical protein | NA         | NA                                                                        |
| Supercontig_1.14_MV<br>LG_02046_10sp  | -828,91942 | -828,91893 | 0,00098 | 0,00049 | NS | 0 | □ | □ | □ | □ | hypothetical protein | PF10296.2  | DUF2404(Putative integral membrane protein conserved region (DUF2404))    |
| Supercontig_1.16_MV<br>LG_02247_8sp   | -846,23801 | -846,23801 | 0       | 0       | NS | 0 | □ | □ | □ | □ | hypothetical protein | PF02789.10 | Peptidase_M17_N(Cytosol aminopeptidase family, N-terminal domain)         |
| Supercontig_1.101_MV<br>LG_06166_10sp | -727,97779 | -727,97779 | 0       | 0       | NS | 0 | □ | □ | □ | □ | hypothetical protein | NA         | NA                                                                        |
| Supercontig_1.28_MV<br>LG_03170_7sp   | -379,50326 | -379,45514 | 0,09624 | 0,04698 | NS | 0 | □ | □ | □ | □ | hypothetical protein | NA         | NA                                                                        |
| Supercontig_1.57_MV<br>LG_04809_10sp  | -643,45141 | -643,45118 | 0,00046 | 0,00023 | NS | 0 | □ | □ | □ | □ | hypothetical protein | PF05185.9  | PRMT5(PRMT5 arginine-N-methyltransferase)                                 |
| Supercontig_1.15_MV<br>LG_02105_8sp   | -416,8169  | -416,8169  | 0       | 0       | NS | 0 | □ | □ | □ | □ | hypothetical protein | PF00724.13 | Oxidored_FMN(NADH:flavin oxidoreductase / NADH oxidase family)            |
| Supercontig_1.3_MVL<br>G_00561_11sp   | -747,05491 | -747,05491 | 0       | 0       | NS | 0 | □ | □ | □ | □ | hypothetical protein | TIGR00707  | TIGR00707(argD: acetylmornithine and succinylornithine aminotransferases) |
| Supercontig_1.3_MVL<br>G_00599_10sp   | -546,84947 | -545,24188 | 3,21518 | 0,79963 | NS | 0 | □ | □ | □ | □ | hypothetical protein | PF05686.5  | DUF821(Arabidopsis thaliana protein of unknown function (DUF821))         |
| Supercontig_1.9_MVL<br>G_01493_6sp    | -1060,1828 | -1060,1828 | 0       | 0       | NS | 0 | □ | □ | □ | □ | hypothetical protein | PF04987.7  | PigN(Phosphatidylinositolglycan class N (PIG-N))                          |
| Supercontig_1.9_MVL<br>G_01506_7sp    | -1311,2721 | -1311,1524 | 0,23946 | 0,11284 | NS | 0 | □ | □ | □ | □ | hypothetical protein | NA         | NA                                                                        |
| Supercontig_1.2_MVL<br>G_00354_8sp    | -1041,1962 | -1039,8141 | 2,76424 | 0,74895 | NS | 0 | □ | □ | □ | □ | hypothetical protein | NA         | NA                                                                        |
| Supercontig_1.3_MVL<br>G_00657_8sp    | -360,08606 | -358,37242 | 3,42728 | 0,81979 | NS | 0 | □ | □ | □ | □ | hypothetical protein | PF00106.18 | adh_short(short chain dehydrogenase)                                      |
| Supercontig_1.194_MV<br>LG_07057_10sp | -549,75807 | -549,75803 | 0       | 0       | NS | 0 | □ | □ | □ | □ | hypothetical protein | PF04157.9  | EAP30(EAP30/Vps36 family)                                                 |
| Supercontig_1.20_MV<br>LG_02599_8sp   | -1159,0528 | -1158,6664 | 0       | 0       | NS | 0 | □ | □ | □ | □ | hypothetical protein | NA         | NA                                                                        |





|                                      |            |            |         |         |    |   |   |   |   |   |   |   |   |   |   |   |   |   |   |   |                                                          |            |                                                                      |
|--------------------------------------|------------|------------|---------|---------|----|---|---|---|---|---|---|---|---|---|---|---|---|---|---|---|----------------------------------------------------------|------------|----------------------------------------------------------------------|
| Supercontig_1.16_MV<br>LG_02189_9sp  | -409,65653 | -409,65653 | 0       | 0       | NS | 0 | 0 | 0 | 0 | 0 | 0 | 0 | 0 | 0 | 0 | 0 | 0 | 0 | 0 | 0 | hypothetical protein                                     | PF05176.7  | ATP-synt_10(ATP10 protein)                                           |
| Supercontig_1.16_MV<br>LG_02205_10sp | -474,91726 | -474,9172  | 0,00012 | 0       | NS | 0 | 0 | 0 | 0 | 0 | 0 | 0 | 0 | 0 | 0 | 0 | 0 | 0 | 0 | 0 | inorganic pyrophosphatase                                | PF00719.12 | Pyrophosphatase(Inorganic pyrophosphatase)                           |
| Supercontig_1.1_MVL<br>G_00149_7sp   | -550,30944 | -549,66059 | 1,2977  | 0,47735 | NS | 0 | 0 | 0 | 0 | 0 | 0 | 0 | 0 | 0 | 0 | 0 | 0 | 0 | 0 | 0 | hypothetical protein                                     | PF03169.8  | OPT(OPT oligopeptide transporter protein)                            |
| Supercontig_1.10_MV<br>LG_01610_10sp | -803,03178 | -803,03178 | 0       | 0       | NS | 0 | 0 | 0 | 0 | 0 | 0 | 0 | 0 | 0 | 0 | 0 | 0 | 0 | 0 | 0 | hypothetical protein                                     | PF01138.14 | RNase_PH(3' exoribonuclease family, domain 1)                        |
| Supercontig_1.31_MV<br>LG_03350_7sp  | -767,09602 | -767,09573 | 0,00058 | 0,00029 | NS | 0 | 0 | 0 | 0 | 0 | 0 | 0 | 0 | 0 | 0 | 0 | 0 | 0 | 0 | 0 | hypothetical protein                                     | NA         | NA                                                                   |
| Supercontig_1.126_MV<br>LG_06523_7sp | -400,813   | -400,813   | 0       | 0       | NS | 0 | 0 | 0 | 0 | 0 | 0 | 0 | 0 | 0 | 0 | 0 | 0 | 0 | 0 | 0 | hypothetical protein                                     | NA         | NA                                                                   |
| Supercontig_1.3_MVL<br>G_00521_8sp   | -527,01056 | -527,01056 | 0       | 0       | NS | 0 | 0 | 0 | 0 | 0 | 0 | 0 | 0 | 0 | 0 | 0 | 0 | 0 | 0 | 0 | hypothetical protein                                     | PF10338.2  | DUF2423(Protein of unknown function (DUF2423))                       |
| Supercontig_1.78_MV<br>LG_05576_6sp  | -425,42419 | -424,27051 | 2,30736 | 0,68453 | NS | 0 | 0 | 0 | 0 | 0 | 0 | 0 | 0 | 0 | 0 | 0 | 0 | 0 | 0 | 0 | ATP synthase subunit delta                               | TIGR01216  | TIGR01216(ATP_synt_epsilon: ATP synthase F1, epsilon subunit)        |
| Supercontig_1.11_MV<br>LG_01789_8sp  | -408,9702  | -408,9702  | 0       | 0       | NS | 0 | 0 | 0 | 0 | 0 | 0 | 0 | 0 | 0 | 0 | 0 | 0 | 0 | 0 | 0 | hypothetical protein                                     | PF04968.5  | CHORD(CHORD)                                                         |
| Supercontig_1.30_MV<br>LG_03309_7sp  | -279,07186 | -279,07166 | 0,0004  | 0,0002  | NS | 0 | 0 | 0 | 0 | 0 | 0 | 0 | 0 | 0 | 0 | 0 | 0 | 0 | 0 | 0 | 60S ribosomal protein L37-A                              | PF01907.12 | Ribosomal_L37e(Ribosomal protein L37e)                               |
| Supercontig_1.84_MV<br>LG_05764_7sp  | -319,04437 | -319,04432 | 0       | 0       | NS | 0 | 0 | 0 | 0 | 0 | 0 | 0 | 0 | 0 | 0 | 0 | 0 | 0 | 0 | 0 | hypothetical protein                                     | PF08523.3  | MBF1(Multiprotein bridging factor 1)                                 |
| Supercontig_1.8_MVL<br>G_01419_9sp   | -1002,7397 | -1000,3184 | 4,8426  | 0,91119 | *  | 0 | 0 | 0 | 0 | 0 | 0 | 0 | 0 | 0 | 0 | 0 | 0 | 0 | 0 | 0 | hypothetical protein                                     | NA         | NA                                                                   |
| Supercontig_1.9_MVL<br>G_01573_11sp  | -492,9405  | -492,45672 | 0,96756 | 0,38355 | NS | 0 | 0 | 0 | 0 | 0 | 0 | 0 | 0 | 0 | 0 | 0 | 0 | 0 | 0 | 0 | hypothetical protein                                     | PF02893.13 | GRAM(GRAM domain)                                                    |
| Supercontig_1.41_MV<br>LG_04008_12sp | -718,89675 | -718,89671 | 0       | 0       | NS | 0 | 0 | 0 | 0 | 0 | 0 | 0 | 0 | 0 | 0 | 0 | 0 | 0 | 0 | 0 | hypothetical protein                                     | PF10441.2  | Urb2(Urb2/Npa2 family)                                               |
| Supercontig_1.16_MV<br>LG_02195_9sp  | -799,32565 | -797,54389 | 3,56352 | 0,83166 | NS | 0 | 0 | 0 | 0 | 0 | 0 | 0 | 0 | 0 | 0 | 0 | 0 | 0 | 0 | 0 | hypothetical protein                                     | NA         | NA                                                                   |
| Supercontig_1.117_MV<br>LG_06393_7sp | -822,06989 | -822,06987 | 0       | 0       | NS | 0 | 0 | 0 | 0 | 0 | 0 | 0 | 0 | 0 | 0 | 0 | 0 | 0 | 0 | 0 | hypothetical protein                                     | NA         | NA                                                                   |
| Supercontig_1.6_MVL<br>G_01127_9sp   | -372,73654 | -372,73636 | 0,00036 | 0,00018 | NS | 0 | 0 | 0 | 0 | 0 | 0 | 0 | 0 | 0 | 0 | 0 | 0 | 0 | 0 | 0 | eukaryotic translation initiation factor 2 subunit alpha | PF00575.16 | S1(S1 RNA binding domain)                                            |
| Supercontig_1.31_MV<br>LG_03329_7sp  | -1287,577  | -1287,577  | 0       | 0       | NS | 0 | 0 | 0 | 0 | 0 | 0 | 0 | 0 | 0 | 0 | 0 | 0 | 0 | 0 | 0 | hypothetical protein                                     | PF07926.5  | TPR_MLP1_2(TPR/MLP1/MLP2-like protein)                               |
| Supercontig_1.84_MV<br>LG_05756_7sp  | -710,56033 | -710,5602  | 0,00026 | 0,00013 | NS | 0 | 0 | 0 | 0 | 0 | 0 | 0 | 0 | 0 | 0 | 0 | 0 | 0 | 0 | 0 | hypothetical protein                                     | PF04427.11 | Brix(Brix domain)                                                    |
| Supercontig_1.9_MVL<br>G_01551_7sp   | -581,10065 | -579,86067 | 2,47996 | 0,71061 | NS | 0 | 0 | 0 | 0 | 0 | 0 | 0 | 0 | 0 | 0 | 0 | 0 | 0 | 0 | 0 | hypothetical protein                                     | NA         | NA                                                                   |
| Supercontig_1.41_MV<br>LG_03996_8sp  | -1273,117  | -1272,974  | 0,286   | 0,13325 | NS | 0 | 0 | 0 | 0 | 0 | 0 | 0 | 0 | 0 | 0 | 0 | 0 | 0 | 0 | 0 | hypothetical protein                                     | PF04727.6  | ELMO_CED12(ELMO/CED-12 family)                                       |
| Supercontig_1.33_MV<br>LG_03469_9sp  | -548,81473 | -548,81473 | 0       | 0       | NS | 0 | 0 | 0 | 0 | 0 | 0 | 0 | 0 | 0 | 0 | 0 | 0 | 0 | 0 | 0 | hypothetical protein                                     | NA         | NA                                                                   |
| Supercontig_1.39_MV<br>LG_03830_9sp  | -356,25484 | -356,25484 | 0       | 0       | NS | 0 | 0 | 0 | 0 | 0 | 0 | 0 | 0 | 0 | 0 | 0 | 0 | 0 | 0 | 0 | hypothetical protein                                     | PF05327.4  | RRN3(RNA polymerase I specific transcription initiation factor RRN3) |

|                                       |            |            |         |         |    |   |   |   |   |                                                     |            |                                                                               |
|---------------------------------------|------------|------------|---------|---------|----|---|---|---|---|-----------------------------------------------------|------------|-------------------------------------------------------------------------------|
| Supercontig_1.141_MV<br>LG_06696_6sp  | -929,37286 | -927,815   | 3,11572 | 0,78941 | NS | 0 | 0 | 0 | 0 | hypothetical protein                                | PF04757.7  | Pex2_Pex12(Pex2 / Pex12 amino terminal region)                                |
| Supercontig_1.6_MVL<br>G_01191_6sp    | -1589,1329 | -1589,0154 | 0,23498 | 0,11085 | NS | 0 | 0 | 0 | 0 | hypothetical protein                                | NA         | NA                                                                            |
| Supercontig_1.34_MV<br>LG_03525_9sp   | -692,8351  | -692,12871 | 1,41278 | 0,50658 | NS | 0 | 0 | 0 | 0 | hypothetical protein                                | PF03874.9  | RNA_pol_Rpb4(RNA polymerase Rpb4)                                             |
| Supercontig_1.3_MVL<br>G_00557_11sp   | -594,47039 | -594,43283 | 0,07512 | 0,03686 | NS | 0 | 0 | 0 | 0 | hypothetical protein                                | PF08613.4  | Cyclin(Cyclin)                                                                |
| Supercontig_1.101_MV<br>LG_06150_7sp  | -416,63635 | -416,44229 | 0,38812 | 0,17639 | NS | 0 | 0 | 0 | 0 | hypothetical protein                                | PF01764.18 | Lipase_3(Lipase (class 3))                                                    |
| Supercontig_1.11_MV<br>LG_01758_9sp   | -2852,463  | -2852,33   | 0,266   | 0,12453 | NS | 0 | 0 | 0 | 0 | hypothetical protein                                | PF02752.15 | Arrestin_C(Arrestin (or S-antigen), C-terminal domain)                        |
| Supercontig_1.24_MV<br>LG_02862_9sp   | -1069,2443 | -1065,1147 | 8,25914 | 0,98391 | ** | 0 | 0 | 0 | 0 | hypothetical protein                                | NA         | NA                                                                            |
| Supercontig_1.29_MV<br>LG_03233_6sp   | -337,55676 | -337,55656 | 0,0004  | 0,0002  | NS | 0 | 0 | 0 | 0 | gluconate 5-dehydrogenase                           | PF00106.18 | adh_short(short chain dehydrogenase)                                          |
| Supercontig_1.7_MVL<br>G_01246_12sp   | -703,19276 | -703,15406 | 0,0774  | 0,03796 | NS | 0 | 0 | 0 | 0 | hypothetical protein                                | PF00171.15 | Aldedh(Aldehyde dehydrogenase family)                                         |
| Supercontig_1.3_MVL<br>G_00597_7sp    | -463,27218 | -463,27205 | 0,00026 | 0,00013 | NS | 0 | 0 | 0 | 0 | hypothetical protein                                | PF03907.6  | Spo7(Spo7-like protein)                                                       |
| Supercontig_1.132_MV<br>LG_06594_11sp | -985,1293  | -984,8063  | 0,646   | 0,27603 | NS | 0 | 0 | 0 | 0 | hypothetical protein                                | PF00102.20 | Y_phosphatase(Protein-tyrosine phosphatase)                                   |
| Supercontig_1.33_MV<br>LG_03458_11sp  | -470,86155 | -470,86155 | 0       | 0       | NS | 0 | 0 | 0 | 0 | hypothetical protein                                | NA         | NA                                                                            |
| Supercontig_1.26_MV<br>LG_03007_7sp   | -921,72087 | -920,45042 | 2,5409  | 0,71929 | NS | 0 | 0 | 0 | 0 | hypothetical protein                                | NA         | NA                                                                            |
| Supercontig_1.42_MV<br>LG_04044_8sp   | -699,78406 | -699,54352 | 0,48108 | 0,2138  | NS | 0 | 0 | 0 | 0 | hypothetical protein                                | NA         | NA                                                                            |
| Supercontig_1.5_MVL<br>G_01048_9sp    | -379,22279 | -379,21627 | 0,01304 | 0,0065  | NS | 0 | 0 | 0 | 0 | hypothetical protein                                | PF07942.5  | N2227(N2227-like protein)                                                     |
| Supercontig_1.3_MVL<br>G_00672_6sp    | -809,87672 | -809,39826 | 0,95692 | 0,38026 | NS | 0 | 0 | 0 | 0 | hypothetical protein                                | PF01694.15 | Rhomboid(Rhomboid family)                                                     |
| Supercontig_1.150_MV<br>LG_06776_8sp  | -1077,1719 | -1077,1719 | 0       | 0       | NS | 0 | 0 | 0 | 0 | hypothetical protein                                | PF06428.4  | Sec2p(GDP/GTP exchange factor Sec2p)                                          |
| Supercontig_1.2_MVL<br>G_00308_11sp   | -448,34249 | -448,3064  | 0,07218 | 0,03545 | NS | 0 | 0 | 0 | 0 | hypothetical protein                                | TIGR00880  | TIGR00880(2_A_01_02: Multidrug resistance protein)                            |
| Supercontig_1.7_MVL<br>G_01304_9sp    | -1055,7508 | -1054,9504 | 1,60092 | 0,55088 | NS | 0 | 0 | 0 | 0 | hypothetical protein                                | PF04488.8  | Gly_transf_sug(Glycosyltransferase sugar-binding region containing DXD motif) |
| Supercontig_1.2_MVL<br>G_00362_6sp    | -780,6035  | -780,60348 | 0       | 0       | NS | 0 | 0 | 0 | 0 | hypothetical protein                                | NA         | NA                                                                            |
| Supercontig_1.2_MVL<br>G_00335_7sp    | -1114,8955 | -1114,8955 | 0       | 0       | NS | 0 | 0 | 0 | 0 | hypothetical protein                                | PF11312.1  | DUF3115(Protein of unknown function (DUF3115))                                |
| Supercontig_1.12_MV<br>LG_01833_8sp   | -665,91593 | -665,01932 | 1,79322 | 0,59205 | NS | 0 | 0 | 0 | 0 | hypothetical protein                                | PF00018.21 | SH3_1(SH3 domain)                                                             |
| Supercontig_1.66_MV<br>LG_05159_6sp   | -968,80514 | -968,14528 | 1,31972 | 0,48308 | NS | 0 | 0 | 0 | 0 | hypothetical protein                                | PF00226.24 | DnaJ(DnaJ domain)                                                             |
| Supercontig_1.28_MV<br>LG_03179_6sp   | -886,1775  | -885,54917 | 1,25666 | 0,46652 | NS | 0 | 0 | 0 | 0 | sarcoplasmic/endoplasmic reticulum calcium ATPase 3 | TIGR01494  | TIGR01494(ATPase_P-type: HAD ATPase, P-type, family IC)                       |
| Supercontig_1.99_MV<br>LG_06114_10sp  | -572,51068 | -570,79428 | 3,4328  | 0,82029 | NS | 0 | 0 | 0 | 0 | hypothetical protein                                | PF04188.6  | Mannosyl_trans2(Mannosyltransferase (PIG-V))                                  |

|                                       |            |            |         |         |    |   |   |   |   |   |   |   |   |   |                                                       |            |                                                                        |
|---------------------------------------|------------|------------|---------|---------|----|---|---|---|---|---|---|---|---|---|-------------------------------------------------------|------------|------------------------------------------------------------------------|
| Supercontig_1.3_MVL<br>G_00507_8sp    | -932,94954 | -932,94954 | 0       | 0       | NS | 0 | 0 | 0 | 0 | 0 | 0 | 0 | 0 | 0 | hypothetical protein                                  | TIGR00887  | TIGR00887(2A0109:<br>phosphate:H+ symporter)                           |
| Supercontig_1.17_MV<br>LG_02284_9sp   | -1073,3958 | -1073,3958 | 0       | 0       | NS | 0 | 0 | 0 | 0 | 0 | 0 | 0 | 0 | 0 | peroxisomal hydratase-<br>dehydrogenase-<br>epimerase | PF00106.18 | adh_short(short chain<br>dehydrogenase)                                |
| Supercontig_1.82_MV<br>LG_05718_8sp   | -381,28003 | -381,28003 | 0       | 0       | NS | 0 | 0 | 0 | 0 | 0 | 0 | 0 | 0 | 0 | hypothetical protein                                  | PF00782.13 | DSPc(Dual specificity<br>phosphatase, catalytic domain)                |
| Supercontig_1.55_MV<br>LG_04742_11sp  | -473,23231 | -473,23172 | 0,00118 | 0,00059 | NS | 0 | 0 | 0 | 0 | 0 | 0 | 0 | 0 | 0 | iron-sulfur clusters<br>transporter ATM1              | PF00664.16 | ABC_membrane(ABC<br>transporter transmembrane<br>region)               |
| Supercontig_1.29_MV<br>LG_03216_9sp   | -875,31173 | -875,25918 | 0,1051  | 0,05119 | NS | 0 | 0 | 0 | 0 | 0 | 0 | 0 | 0 | 0 | stearoyl-CoA<br>desaturase (delta-9<br>desaturase)    | PF00173.21 | Cyt-b5(Cytochrome b5-like<br>Heme/Steroid binding domain)              |
| Supercontig_1.64_MV<br>LG_05109_8sp   | -584,27688 | -583,26127 | 2,03122 | 0,63782 | NS | 0 | 0 | 0 | 0 | 0 | 0 | 0 | 0 | 0 | hypothetical protein                                  | PF05207.6  | zf-CSL(CSL zinc finger)                                                |
| Supercontig_1.3_MVL<br>G_00604_9sp    | -384,76518 | -384,76504 | 0,00028 | 0,00014 | NS | 0 | 0 | 0 | 0 | 0 | 0 | 0 | 0 | 0 | hypothetical protein                                  | PF02845.9  | CUE(CUE domain)                                                        |
| Supercontig_1.44_MV<br>LG_04182_12sp  | -554,95274 | -554,90366 | 0,09816 | 0,0479  | NS | 0 | 0 | 0 | 0 | 0 | 0 | 0 | 0 | 0 | hypothetical protein                                  | TIGR00913  | TIGR00913(2A0310: amino acid<br>permease (yeast))                      |
| Supercontig_1.102_MV<br>LG_06174_7sp  | -344,53596 | -344,27528 | 0,52136 | 0,22947 | NS | 0 | 0 | 0 | 0 | 0 | 0 | 0 | 0 | 0 | hypothetical protein                                  | NA         | NA                                                                     |
| Supercontig_1.10_MV<br>LG_01638_8sp   | -831,53983 | -831,53957 | 0,00052 | 0,00026 | NS | 0 | 0 | 0 | 0 | 0 | 0 | 0 | 0 | 0 | clathrin heavy chain                                  | PF01394.13 | Clathrin_propel(Clathrin propeller<br>repeat)                          |
| Supercontig_1.80_MV<br>LG_05650_8sp   | -644,39428 | -643,89204 | 1,00448 | 0,39483 | NS | 0 | 0 | 0 | 0 | 0 | 0 | 0 | 0 | 0 | hypothetical protein                                  | PF09295.3  | ChAPs(ChAPs (Chs5p-Arf1p-<br>binding proteins))                        |
| Supercontig_1.6_MVL<br>G_01218_8sp    | -1455,7501 | -1455,6576 | 0,18488 | 0,0883  | NS | 0 | 0 | 0 | 0 | 0 | 0 | 0 | 0 | 0 | 1,3-beta-glucan<br>synthase component<br>FKS1         | PF02364.8  | Glucan_synthase(1,3-beta-<br>glucan synthase component)                |
| Supercontig_1.34_MV<br>LG_03509_6sp   | -615,11568 | -615,11568 | 0       | 0       | NS | 0 | 0 | 0 | 0 | 0 | 0 | 0 | 0 | 0 | hypothetical protein                                  | PF06244.5  | DUF1014(Protein of unknown<br>function (DUF1014))                      |
| Supercontig_1.6_MVL<br>G_01192_8sp    | -925,47479 | -925,47479 | 0       | 0       | NS | 0 | 0 | 0 | 0 | 0 | 0 | 0 | 0 | 0 | hypothetical protein                                  | NA         | NA                                                                     |
| Supercontig_1.13_MV<br>LG_01886_10sp  | -673,83343 | -672,48465 | 2,69756 | 0,74044 | NS | 0 | 0 | 0 | 0 | 0 | 0 | 0 | 0 | 0 | hypothetical protein                                  | NA         | NA                                                                     |
| Supercontig_1.58_MV<br>LG_04850_8sp   | -1187,6213 | -1187,6138 | 0,0149  | 0,00742 | NS | 0 | 0 | 0 | 0 | 0 | 0 | 0 | 0 | 0 | hypothetical protein                                  | PF01940.9  | DUF92(Integral membrane<br>protein DUF92)                              |
| Supercontig_1.1_MVL<br>G_00117_8sp    | -303,79336 | -303,72573 | 0,13526 | 0,06539 | NS | 0 | 0 | 0 | 0 | 0 | 0 | 0 | 0 | 0 | hypothetical protein                                  | NA         | NA                                                                     |
| Supercontig_1.170_MV<br>LG_06937_10sp | -879,80848 | -879,02659 | 1,56378 | 0,54246 | NS | 0 | 0 | 0 | 0 | 0 | 0 | 0 | 0 | 0 | hypothetical protein                                  | PF00400.25 | WD40(WD domain, G-beta<br>repeat)                                      |
| Supercontig_1.98_MV<br>LG_06079_6sp   | -799,67952 | -799,63383 | 0,09138 | 0,04466 | NS | 0 | 0 | 0 | 0 | 0 | 0 | 0 | 0 | 0 | hypothetical protein                                  | PF00083.17 | Sugar_tr(Sugar (and other)<br>transporter)                             |
| Supercontig_1.6_MVL<br>G_01150_8sp    | -535,16047 | -535,16009 | 0,00076 | 0,00038 | NS | 0 | 0 | 0 | 0 | 0 | 0 | 0 | 0 | 0 | hypothetical protein                                  | PF02551.8  | Acyl_CoA_thio(Acyl-CoA<br>thioesterase)                                |
| Supercontig_1.1_MVL<br>G_00100_10sp   | -715,88286 | -715,87512 | 0,01548 | 0,00771 | NS | 0 | 0 | 0 | 0 | 0 | 0 | 0 | 0 | 0 | hypothetical protein                                  | NA         | NA                                                                     |
| Supercontig_1.8_MVL<br>G_01366_10sp   | -468,916   | -468,916   | 0       | 0       | NS | 0 | 0 | 0 | 0 | 0 | 0 | 0 | 0 | 0 | DNA primase small<br>subunit                          | PF01896.12 | DNA_primase_S(Eukaryotic and<br>archaeal DNA primase small<br>subunit) |

|                                      |            |            |         |         |    |   |   |   |   |   |                                  |            |                                                         |
|--------------------------------------|------------|------------|---------|---------|----|---|---|---|---|---|----------------------------------|------------|---------------------------------------------------------|
| Supercontig_1.73_MV<br>LG_05407_8sp  | -733,065   | -732,69437 | 0,74126 | 0,3097  | NS | 0 | □ | □ | □ | □ | hypothetical protein             | PF02176.11 | zf-TRAF(TRAF-type zinc finger)                          |
| Supercontig_1.6_MVL<br>G_01175_7sp   | -527,01161 | -525,91699 | 2,18924 | 0,66533 | NS | 0 | □ | □ | □ | □ | hypothetical protein             | NA         | NA                                                      |
| Supercontig_1.87_MV<br>LG_05865_10sp | -812,78175 | -811,33129 | 2,90092 | 0,76554 | NS | 0 | □ | □ | □ | □ | hypothetical protein             | PF04479.6  | RTA1(RTA1 like protein)                                 |
| Supercontig_1.18_MV<br>LG_02399_9sp  | -659,36991 | -659,36978 | 0,00026 | 0,00013 | NS | 0 | □ | □ | □ | □ | hypothetical protein             | PF11702.1  | DUF3295(Protein of unknown function (DUF3295))          |
| Supercontig_1.198_MV<br>LG_07079_9sp | -407,8607  | -407,8607  | 0       | 0       | NS | 0 | □ | □ | □ | □ | hypothetical protein             | NA         | NA                                                      |
| Supercontig_1.57_MV<br>LG_04824_11sp | -517,02219 | -517,02219 | 0       | 0       | NS | 0 | □ | □ | □ | □ | hypothetical protein             | PF04410.7  | Gar1(Gar1/Naf1 RNA binding region)                      |
| Supercontig_1.4_MVL<br>G_00842_10sp  | -661,27874 | -661,27874 | 0       | 0       | NS | 0 | □ | □ | □ | □ | prephenate dehydratase           | PF00800.11 | PDT(Prephenate dehydratase)                             |
| Supercontig_1.58_MV<br>LG_04882_7sp  | -1149,5845 | -1149,5845 | 0       | 0       | NS | 0 | □ | □ | □ | □ | hypothetical protein             | PF08698.4  | Fcf2(Fcf2 pre-rRNA processing)                          |
| Supercontig_1.3_MVL<br>G_00549_9sp   | -825,55324 | -825,55324 | 0       | 0       | NS | 0 | □ | □ | □ | □ | hypothetical protein             | PF02109.9  | DAD(DAD family)                                         |
| Supercontig_1.13_MV<br>LG_01939_8sp  | -1126,4655 | -1126,4655 | 0       | 0       | NS | 0 | □ | □ | □ | □ | hypothetical protein             | NA         | NA                                                      |
| Supercontig_1.25_MV<br>LG_02911_7sp  | -391,30646 | -391,2238  | 0,16532 | 0,07934 | NS | 0 | □ | □ | □ | □ | hypothetical protein             | PF00436.18 | SSB(Single-strand binding protein family)               |
| Supercontig_1.21_MV<br>LG_02609_9sp  | -440,65518 | -440,65518 | 0       | 0       | NS | 0 | □ | □ | □ | □ | hypothetical protein             | PF00153.20 | Mito_carr(Mitochondrial carrier protein)                |
| Supercontig_1.69_MV<br>LG_05292_7sp  | -433,56203 | -433,55    | 0,02406 | 0,01196 | NS | 0 | □ | □ | □ | □ | hypothetical protein             | PF03105.12 | SPX(SPX domain)                                         |
| Supercontig_1.139_MV<br>LG_06664_9sp | -397,16321 | -397,16302 | 0,00038 | 0,00019 | NS | 0 | □ | □ | □ | □ | hypothetical protein             | PF00466.13 | Ribosomal_L10(Ribosomal protein L10)                    |
| Supercontig_1.33_MV<br>LG_03463_12sp | -393,64588 | -392,52267 | 2,24642 | 0,67477 | NS | 0 | □ | □ | □ | □ | hypothetical protein             | NA         | NA                                                      |
| Supercontig_1.185_MV<br>LG_07021_8sp | -477,39551 | -477,14231 | 0,5064  | 0,22369 | NS | 0 | □ | □ | □ | □ | hypothetical protein             | NA         | NA                                                      |
| Supercontig_1.75_MV<br>LG_05484_7sp  | -656,85757 | -656,85663 | 0,00188 | 0,00094 | NS | 0 | □ | □ | □ | □ | GTP-binding nuclear protein spi1 | PF04670.5  | Gtr1_RagA(Gtr1/RagA G protein conserved region)         |
| Supercontig_1.113_MV<br>LG_06339_9sp | -367,38052 | -367,38052 | 0       | 0       | NS | 0 | □ | □ | □ | □ | hypothetical protein             | PF00627.24 | UBA(UBA/TS-N domain)                                    |
| Supercontig_1.65_MV<br>LG_05144_9sp  | -520,89005 | -520,54451 | 0,69108 | 0,29216 | NS | 0 | □ | □ | □ | □ | hypothetical protein             | PF05907.6  | DUF866(Eukaryotic protein of unknown function (DUF866)) |
| Supercontig_1.24_MV<br>LG_02884_9sp  | -998,04681 | -998,04681 | 0       | 0       | NS | 0 | □ | □ | □ | □ | hypothetical protein             | PF00149.21 | Metallophos(Calcineurin-like phosphoesterase)           |
| Supercontig_1.8_MVL<br>G_01438_8sp   | -1493,4539 | -1492,9101 | 1,08756 | 0,41945 | NS | 0 | □ | □ | □ | □ | hypothetical protein             | PF01501.13 | Glyco_transf_8(Glycosyl transferase family 8)           |
| Supercontig_1.11_MV<br>LG_01764_10sp | -527,03428 | -527,03397 | 0,00062 | 0,00031 | NS | 0 | □ | □ | □ | □ | hypothetical protein             | PF00248.14 | Aldo_ket_red(Aldo/keto reductase family)                |
| Supercontig_1.149_MV<br>LG_06766_6sp | -460,5796  | -460,57948 | 0,00024 | 0,00012 | NS | 0 | □ | □ | □ | □ | hypothetical protein             | PF09803.2  | DUF2346(Uncharacterized conserved protein (DUF2346))    |
| Supercontig_1.2_MVL<br>G_00370_10sp  | -490,69518 | -490,661   | 0,06836 | 0,0336  | NS | 0 | □ | □ | □ | □ | hypothetical protein             | PF00400.25 | WD40(WD domain, G-beta repeat)                          |
| Supercontig_1.2_MVL<br>G_00386_11sp  | -940,97082 | -940,42502 | 1,0916  | 0,42062 | NS | 0 | □ | □ | □ | □ | hypothetical protein             | NA         | NA                                                      |

|                                      |            |            |         |         |    |   |   |   |   |   |                                                                   |            |                                                                          |
|--------------------------------------|------------|------------|---------|---------|----|---|---|---|---|---|-------------------------------------------------------------------|------------|--------------------------------------------------------------------------|
| Supercontig_1.111_MV<br>LG_06315_8sp | -652,67048 | -652,47307 | 0,39482 | 0,17915 | NS | 0 | □ | □ | □ | □ | hypothetical protein                                              | PF01263.13 | Aldose_epim(Aldose 1-epimerase)                                          |
| Supercontig_1.9_MVL<br>G_01563_7sp   | -773,18078 | -773,18078 | 0       | 0       | NS | 0 | □ | □ | □ | □ | hypothetical protein                                              | NA         | NA                                                                       |
| Supercontig_1.52_MV<br>LG_04585_6sp  | -531,24233 | -531,22495 | 0,03476 | 0,01723 | NS | 0 | □ | □ | □ | □ | hypothetical protein                                              | PF00172.11 | Zn_clus(Fungal Zn(2)-Cys(6) binuclear cluster domain)                    |
| Supercontig_1.77_MV<br>LG_05557_8sp  | -454,74715 | -454,74703 | 0,00024 | 0,00012 | NS | 0 | □ | □ | □ | □ | hypothetical protein                                              | NA         | NA                                                                       |
| Supercontig_1.42_MV<br>LG_04088_10sp | -528,65965 | -527,55404 | 2,21122 | 0,66899 | NS | 0 | □ | □ | □ | □ | hypothetical protein                                              | PF08325.3  | WLM(WLM domain)                                                          |
| Supercontig_1.38_MV<br>LG_03802_8sp  | -473,33148 | -473,33148 | 0       | 0       | NS | 0 | □ | □ | □ | □ | hypothetical protein                                              | PF10247.2  | Romo1(Reactive mitochondrial oxygen species modulator 1)                 |
| Supercontig_1.6_MVL<br>G_01077_9sp   | -833,85675 | -833,85675 | 0       | 0       | NS | 0 | □ | □ | □ | □ | hypothetical protein                                              | PF04408.16 | HA2(Helicase associated domain (HA2))                                    |
| Supercontig_1.63_MV<br>LG_05045_9sp  | -594,94036 | -594,94035 | 0       | 0       | NS | 0 | □ | □ | □ | □ | hypothetical protein                                              | NA         | NA                                                                       |
| Supercontig_1.13_MV<br>LG_01953_7sp  | -780,87932 | -780,85657 | 0,0455  | 0,02249 | NS | 0 | □ | □ | □ | □ | hypothetical protein                                              | PF00582.19 | Usp(Universal stress protein family)                                     |
| Supercontig_1.45_MV<br>LG_04197_11sp | -269,43286 | -269,4327  | 0,00032 | 0,00016 | NS | 0 | □ | □ | □ | □ | small nuclear ribonucleoprotein G                                 | PF01423.15 | LSM(LSM domain)                                                          |
| Supercontig_1.58_MV<br>LG_04846_6sp  | -1884,201  | -1884,201  | 0       | 0       | NS | 0 | □ | □ | □ | □ | hypothetical protein                                              | PF00225.16 | Kinesin(Kinesin motor domain)                                            |
| Supercontig_1.41_MV<br>LG_04017_7sp  | -594,55283 | -592,73376 | 3,63814 | 0,83782 | NS | 0 | □ | □ | □ | □ | elongation factor Tu                                              | PF03144.18 | GTP_EFTU_D2(Elongation factor Tu domain 2)                               |
| Supercontig_1.3_MVL<br>G_00522_6sp   | -1099,9594 | -1099,867  | 0,1849  | 0,08831 | NS | 0 | □ | □ | □ | □ | hypothetical protein                                              | PF05890.5  | Ebp2(Eukaryotic rRNA processing protein EBP2)                            |
| Supercontig_1.11_MV<br>LG_01739_7sp  | -399,35518 | -399,3551  | 0,00016 | 0       | NS | 0 | □ | □ | □ | □ | hypothetical protein                                              | NA         | NA                                                                       |
| Supercontig_1.16_MV<br>LG_02218_6sp  | -640,19005 | -640,19005 | 0       | 0       | NS | 0 | □ | □ | □ | □ | hypothetical protein                                              | NA         | NA                                                                       |
| Supercontig_1.14_MV<br>LG_02044_9sp  | -971,35762 | -971,16614 | 0,38296 | 0,17426 | NS | 0 | □ | □ | □ | □ | hypothetical protein                                              | PF00083.17 | Sugar_tr(Sugar (and other) transporter)                                  |
| Supercontig_1.59_MV<br>LG_04896_11sp | -469,86855 | -466,79274 | 6,15162 | 0,95385 | ** | 0 | □ | □ | □ | □ | hypothetical protein                                              | TIGR00163  | TIGR00163(PS_decarb: phosphatidylserine decarboxylase)                   |
| Supercontig_1.8_MVL<br>G_01432_7sp   | -484,20968 | -483,11207 | 2,19522 | 0,66633 | NS | 0 | □ | □ | □ | □ | DNA repair and recombination protein RAD54 and RAD54-like protein | PF04851.8  | ResIII(Type III restriction enzyme, res subunit)                         |
| Supercontig_1.59_MV<br>LG_04886_10sp | -504,95783 | -504,95783 | 0       | 0       | NS | 0 | □ | □ | □ | □ | guanine nucleotide-binding protein alpha-1 subunit                | PF00025.14 | Arf(ADP-ribosylation factor family)                                      |
| Supercontig_1.14_MV<br>LG_02012_11sp | -492,51777 | -491,78859 | 1,45836 | 0,5177  | NS | 0 | □ | □ | □ | □ | hypothetical protein                                              | PF00172.11 | Zn_clus(Fungal Zn(2)-Cys(6) binuclear cluster domain)                    |
| Supercontig_1.42_MV<br>LG_04045_9sp  | -444,16818 | -443,83215 | 0,67206 | 0,2854  | NS | 0 | □ | □ | □ | □ | hypothetical protein                                              | PF09736.2  | Bud13(Pre-mRNA-splicing factor of RES complex)                           |
| Supercontig_1.79_MV<br>LG_05629_9sp  | -401,44114 | -401,333   | 0,21628 | 0,1025  | NS | 0 | □ | □ | □ | □ | hypothetical protein                                              | TIGR00879  | TIGR00879(SP: MFS transporter, sugar porter (SP) family)                 |
| Supercontig_1.67_MV<br>LG_05240_9sp  | -343,03153 | -343,03149 | 0       | 0       | NS | 0 | □ | □ | □ | □ | hypothetical protein                                              | PF05405.7  | Mt_ATP-synt_B(Mitochondrial ATP synthase B chain precursor (ATP-synt_B)) |

|                                      |            |            |         |         |    |   |  |  |  |  |                                        |            |                                                                    |
|--------------------------------------|------------|------------|---------|---------|----|---|--|--|--|--|----------------------------------------|------------|--------------------------------------------------------------------|
| Supercontig_1.131_MV<br>LG_06588_7sp | -1043,6488 | -1043,6488 | 0       | 0       | NS | 0 |  |  |  |  | hypothetical protein                   | PF00172.11 | Zn_clus(Fungal Zn(2)-Cys(6) binuclear cluster domain)              |
| Supercontig_1.76_MV<br>LG_05531_10sp | -632,07594 | -632,07594 | 0       | 0       | NS | 0 |  |  |  |  | hypothetical protein                   | PF00432.14 | Prenyltrans(Prenyltransferase and squalene oxidase repeat)         |
| Supercontig_1.51_MV<br>LG_04533_11sp | -651,8615  | -651,8615  | 0       | 0       | NS | 0 |  |  |  |  | hypothetical protein                   | NA         | NA                                                                 |
| Supercontig_1.12_MV<br>LG_01838_8sp  | -1035,3885 | -1035,3431 | 0,09076 | 0,04437 | NS | 0 |  |  |  |  | hypothetical protein                   | PF00515.21 | TPR_1(Tetratricopeptide repeat)                                    |
| Supercontig_1.34_MV<br>LG_03506_6sp  | -1040,1428 | -1040,1428 | 0       | 0       | NS | 0 |  |  |  |  | hypothetical protein                   | PF01207.10 | Dus(Dihydrouridine synthase (Dus))                                 |
| Supercontig_1.1_MVL<br>G_00229_9sp   | -646,3386  | -646,3386  | 0       | 0       | NS | 0 |  |  |  |  | hypothetical protein                   | PF00225.16 | Kinesin(Kinesin motor domain)                                      |
| Supercontig_1.75_MV<br>LG_05493_7sp  | -1012,861  | -1012,861  | 0       | 0       | NS | 0 |  |  |  |  | hypothetical protein                   | PF00443.22 | UCH(Ubiquitin carboxyl-terminal hydrolase)                         |
| Supercontig_1.6_MVL<br>G_01148_9sp   | -338,63897 | -338,63897 | 0       | 0       | NS | 0 |  |  |  |  | hypothetical protein                   | NA         | NA                                                                 |
| Supercontig_1.10_MV<br>LG_01622_11sp | -478,16698 | -478,16675 | 0,00046 | 0,00023 | NS | 0 |  |  |  |  | hypothetical protein                   | PF04042.9  | DNA_pol_E_B(DNA polymerase alpha/epsilon subunit B)                |
| Supercontig_1.21_MV<br>LG_02661_9sp  | -996,70461 | -996,67326 | 0,0627  | 0,03086 | NS | 0 |  |  |  |  | heat shock protein 90-1                | PF02518.19 | HATPase_c(Histidine kinase-, DNA gyrase B-, and HSP90-like ATPase) |
| Supercontig_1.16_MV<br>LG_02244_9sp  | -370,04795 | -366,79252 | 6,51086 | 0,96144 | ** | 0 |  |  |  |  | hypothetical protein                   | PF01042.14 | Ribonuc_L-PSP(Endoribonuclease L-PSP)                              |
| Supercontig_1.1_MVL<br>G_00197_8sp   | -1037,8459 | -1037,8459 | 0       | 0       | NS | 0 |  |  |  |  | hypothetical protein                   | PF03915.6  | AIP3(Actin interacting protein 3)                                  |
| Supercontig_1.92_MV<br>LG_05966_9sp  | -495,95367 | -495,95367 | 0       | 0       | NS | 0 |  |  |  |  | hypothetical protein                   | PF00557.17 | Peptidase_M24(Metallopeptidase family M24)                         |
| Supercontig_1.1_MVL<br>G_00222_9sp   | -555,06653 | -555,0663  | 0,00046 | 0,00023 | NS | 0 |  |  |  |  | phospholipid-translocating ATPase      | TIGR01494  | TIGR01494(ATPase_P-type: HAD ATPase, P-type, family IC)            |
| Supercontig_1.186_MV<br>LG_07029_8sp | -559,20032 | -559,19957 | 0,0015  | 0,00075 | NS | 0 |  |  |  |  | ubiquitin-conjugating enzyme E2-16 kDa | PF00179.19 | UQ_con(Ubiquitin-conjugating enzyme)                               |
| Supercontig_1.35_MV<br>LG_03583_8sp  | -541,63293 | -539,01097 | 5,24392 | 0,92734 | *  | 0 |  |  |  |  | hypothetical protein                   | PF00320.20 | GATA(GATA zinc finger)                                             |
| Supercontig_1.31_MV<br>LG_03330_10sp | -511,66729 | -511,66729 | 0       | 0       | NS | 0 |  |  |  |  | mitochondrial Rho GTPase 1             | PF08477.6  | Miro(Miro-like protein)                                            |
| Supercontig_1.7_MVL<br>G_01275_9sp   | -463,54511 | -463,54511 | 0       | 0       | NS | 0 |  |  |  |  | hypothetical protein                   | PF00076.15 | RRM_1(RNA recognition motif. (a.k.a. RRM, RBD, or RNP domain))     |
| Supercontig_1.26_MV<br>LG_03008_11sp | -599,70737 | -599,70687 | 0,001   | 0,0005  | NS | 0 |  |  |  |  | hypothetical protein                   | PF00743.12 | FMO-like(Flavin-binding monooxygenase-like)                        |
| Supercontig_1.25_MV<br>LG_02978_6sp  | -524,1691  | -524,1691  | 0       | 0       | NS | 0 |  |  |  |  | hypothetical protein                   | PF01728.12 | FtsJ(FtsJ-like methyltransferase)                                  |
| Supercontig_1.3_MVL<br>G_00614_9sp   | -1996,0139 | -1994,3978 | 3,23222 | 0,80133 | NS | 0 |  |  |  |  | AGC/RSK protein kinase                 | PF07714.10 | Pkinase_Tyr(Protein tyrosine kinase)                               |
| Supercontig_1.2_MVL<br>G_00462_8sp   | -236,50632 | -234,14015 | 4,73234 | 0,90616 | *  | 0 |  |  |  |  | 60S ribosomal protein L8               | PF00181.16 | Ribosomal_L2(Ribosomal Proteins L2, RNA binding domain)            |

|                                      |            |            |         |         |    |   |   |   |   |                                                     |            |                                                                      |
|--------------------------------------|------------|------------|---------|---------|----|---|---|---|---|-----------------------------------------------------|------------|----------------------------------------------------------------------|
| Supercontig_1.62_MV<br>LG_05014_9sp  | -349,66609 | -348,46566 | 2,40086 | 0,69894 | NS | 0 | □ | □ | □ | nascent polypeptide-associated complex subunit beta | PF01849.11 | NAC(NAC domain)                                                      |
| Supercontig_1.19_MV<br>LG_02491_9sp  | -520,33595 | -520,33595 | 0       | 0       | NS | 0 | □ | □ | □ | hypothetical protein                                | NA         | NA                                                                   |
| Supercontig_1.35_MV<br>LG_03631_6sp  | -521,01321 | -521,01321 | 0       | 0       | NS | 0 | □ | □ | □ | hypothetical protein                                | NA         | NA                                                                   |
| Supercontig_1.1_MVL<br>G_00224_12sp  | -645,30562 | -645,30562 | 0       | 0       | NS | 0 | □ | □ | □ | hypothetical protein                                | PF00916.13 | Sulfate_transp(Sulfate transporter family)                           |
| Supercontig_1.38_MV<br>LG_03787_7sp  | -1985,2958 | -1982,5625 | 5,46664 | 0,935   | *  | 0 | □ | □ | □ | hypothetical protein                                | PF10168.2  | Nup88(Nuclear pore component)                                        |
| Supercontig_1.32_MV<br>LG_03432_7sp  | -1286,3093 | -1283,8474 | 4,9239  | 0,91473 | *  | 0 | □ | □ | □ | hypothetical protein                                | NA         | NA                                                                   |
| Supercontig_1.46_MV<br>LG_04254_9sp  | -538,9115  | -538,9115  | 0       | 0       | NS | 0 | □ | □ | □ | OPT family small oligopeptide transporter           | TIGR00727  | TIGR00727(ISP4_OPT: small oligopeptide transporter, OPT family)      |
| Supercontig_1.1_MVL<br>G_00176_11sp  | -455,46542 | -455,46542 | 0       | 0       | NS | 0 | □ | □ | □ | hypothetical protein                                | PF02450.8  | LACT(Lecithin:cholesterol acyltransferase)                           |
| Supercontig_1.61_MV<br>LG_04957_9sp  | -892,63774 | -892,09698 | 1,08152 | 0,41769 | NS | 0 | □ | □ | □ | hypothetical protein                                | NA         | NA                                                                   |
| Supercontig_1.2_MVL<br>G_00337_7sp   | -383,15658 | -383,14423 | 0,0247  | 0,01227 | NS | 0 | □ | □ | □ | hypothetical protein                                | PF00581.13 | Rhodanese(Rhodanese-like domain)                                     |
| Supercontig_1.29_MV<br>LG_03235_9sp  | -495,34861 | -495,3486  | 0       | 0       | NS | 0 | □ | □ | □ | hypothetical protein                                | PF08241.5  | Methyltransf_11(Methyltransferase domain)                            |
| Supercontig_1.11_MV<br>LG_01695_8sp  | -852,33438 | -850,96447 | 2,73982 | 0,74587 | NS | 0 | □ | □ | □ | hypothetical protein                                | PF04193.7  | PQ-loop(PQ loop repeat)                                              |
| Supercontig_1.12_MV<br>LG_01861_7sp  | -336,49754 | -336,49754 | 0       | 0       | NS | 0 | □ | □ | □ | hypothetical protein                                | PF08660.4  | Alg14(Oligosaccharide biosynthesis protein Alg14 like)               |
| Supercontig_1.10_MV<br>LG_01646_7sp  | -803,41953 | -803,41953 | 0       | 0       | NS | 0 | □ | □ | □ | hypothetical protein                                | NA         | NA                                                                   |
| Supercontig_1.64_MV<br>LG_05106_8sp  | -370,95983 | -370,72913 | 0,4614  | 0,20602 | NS | 0 | □ | □ | □ | voltage-gated potassium channel subunit beta        | TIGR01293  | TIGR01293(Kv_beta: voltage-dependent potassium channel beta subunit) |
| Supercontig_1.10_MV<br>LG_01579_7sp  | -781,29077 | -781,29077 | 0       | 0       | NS | 0 | □ | □ | □ | hypothetical protein                                | PF08585.5  | DUF1767(Domain of unknown function (DUF1767))                        |
| Supercontig_1.11_MV<br>LG_01736_8sp  | -1001,0873 | -999,97033 | 2,23402 | 0,67274 | NS | 0 | □ | □ | □ | hypothetical protein                                | NA         | NA                                                                   |
| Supercontig_1.30_MV<br>LG_03279_12sp | -432,41749 | -432,41749 | 0       | 0       | NS | 0 | □ | □ | □ | hypothetical protein                                | TIGR00879  | TIGR00879(SP: MFS transporter, sugar porter (SP) family)             |
| Supercontig_1.10_MV<br>LG_01662_6sp  | -294,58347 | -294,58332 | 0,0003  | 0,00015 | NS | 0 | □ | □ | □ | hypothetical protein                                | PF00076.15 | RRM_1(RNA recognition motif. (a.k.a. RRM, RBD, or RNP domain))       |
| Supercontig_1.1_MVL<br>G_00087_11sp  | -347,93788 | -347,93783 | 0       | 0       | NS | 0 | □ | □ | □ | YggS family pyridoxal phosphate enzyme              | PF01168.13 | Ala_racemase_N(Alanine racemase, N-terminal domain)                  |
| Supercontig_1.38_MV<br>LG_03780_6sp  | -461,6646  | -461,65454 | 0,02012 | 0,01001 | NS | 0 | □ | □ | □ | hypothetical protein                                | PF00173.21 | Cyt-b5(Cytochrome b5-like Heme/Steroid binding domain)               |
| Supercontig_1.5_MVL<br>G_00879_8sp   | -643,97795 | -643,97765 | 0,0006  | 0,0003  | NS | 0 | □ | □ | □ | hypothetical protein                                | PF08265.4  | YL1_C(YL1 nuclear protein C-terminal domain)                         |



|                                       |            |            |         |         |    |   |   |   |   |   |   |   |   |                                                           |            |                                                                                                |
|---------------------------------------|------------|------------|---------|---------|----|---|---|---|---|---|---|---|---|-----------------------------------------------------------|------------|------------------------------------------------------------------------------------------------|
| Supercontig_1.116_MV<br>LG_06378_10sp | -520,07647 | -520,07647 | 0       | 0       | NS | 0 | 0 | 0 | 0 | 0 | 0 | 0 | 0 | hypothetical protein                                      | NA         | NA                                                                                             |
| Supercontig_1.63_MV<br>LG_05058_10sp  | -282,29871 | -282,29852 | 0,00038 | 0,00019 | NS | 0 | 0 | 0 | 0 | 0 | 0 | 0 | 0 | succinate dehydrogenase [ubiquinone] flavoprotein subunit | TIGR01812  | TIGR01812(sdhA_frda_Gneg: succinate dehydrogenase or fumarate reductase, flavoprotein subunit) |
| Supercontig_1.26_MV<br>LG_02993_11sp  | -993,64965 | -991,73991 | 3,81948 | 0,85188 | NS | 0 | 0 | 0 | 0 | 0 | 0 | 0 | 0 | hypothetical protein                                      | PF00046.22 | Homeobox(Homeobox domain)                                                                      |
| Supercontig_1.2_MVL<br>G_00416_7sp    | -1097,3369 | -1096,1932 | 2,28736 | 0,68136 | NS | 0 | 0 | 0 | 0 | 0 | 0 | 0 | 0 | hypothetical protein                                      | PF00076.15 | RRM_1(RNA recognition motif. (a.k.a. RRM, RBD, or RNP domain))                                 |
| Supercontig_1.17_MV<br>LG_02285_9sp   | -635,72171 | -635,72171 | 0       | 0       | NS | 0 | 0 | 0 | 0 | 0 | 0 | 0 | 0 | hypothetical protein                                      | NA         | NA                                                                                             |
| Supercontig_1.53_MV<br>LG_04630_7sp   | -874,25249 | -874,25249 | 0       | 0       | NS | 0 | 0 | 0 | 0 | 0 | 0 | 0 | 0 | hypothetical protein                                      | PF04427.11 | Brix(Brix domain)                                                                              |
| Supercontig_1.86_MV<br>LG_05840_7sp   | -765,07456 | -764,44135 | 1,26642 | 0,46912 | NS | 0 | 0 | 0 | 0 | 0 | 0 | 0 | 0 | hypothetical protein                                      | PF00328.15 | Acid_phosphat_A(Histidine acid phosphatase)                                                    |
| Supercontig_1.107_MV<br>LG_06241_7sp  | -1259,4965 | -1259,4113 | 0,1703  | 0,08163 | NS | 0 | 0 | 0 | 0 | 0 | 0 | 0 | 0 | hypothetical protein                                      | PF02845.9  | CUE(CUE domain)                                                                                |
| Supercontig_1.6_MVL<br>G_01160_9sp    | -831,06694 | -830,05928 | 2,01532 | 0,63493 | NS | 0 | 0 | 0 | 0 | 0 | 0 | 0 | 0 | hypothetical protein                                      | PF00018.21 | SH3_1(SH3 domain)                                                                              |
| Supercontig_1.38_MV<br>LG_03767_7sp   | -895,35205 | -895,35205 | 0       | 0       | NS | 0 | 0 | 0 | 0 | 0 | 0 | 0 | 0 | hypothetical protein                                      | PF03099.12 | BPL_LplA_LipB(Biotin/lipoate A/B protein ligase family)                                        |
| Supercontig_1.99_MV<br>LG_06104_9sp   | -588,17526 | -588,17495 | 0,00062 | 0,00031 | NS | 0 | 0 | 0 | 0 | 0 | 0 | 0 | 0 | hypothetical protein                                      | PF08426.3  | ICE2(ICE2)                                                                                     |
| Supercontig_1.13_MV<br>LG_01975_12sp  | -724,824   | -724,45853 | 0,73094 | 0,30613 | NS | 0 | 0 | 0 | 0 | 0 | 0 | 0 | 0 | hypothetical protein                                      | PF01636.16 | APH(Phosphotransferase enzyme family)                                                          |
| Supercontig_1.36_MV<br>LG_03667_8sp   | -357,79963 | -357,79962 | 0       | 0       | NS | 0 | 0 | 0 | 0 | 0 | 0 | 0 | 0 | hypothetical protein                                      | PF10306.2  | FLILHELTA(Hypothetical protein FLILHELTA)                                                      |
| Supercontig_1.12_MV<br>LG_01824_10sp  | -540,85276 | -540,394   | 0,91752 | 0,36793 | NS | 0 | 0 | 0 | 0 | 0 | 0 | 0 | 0 | hypothetical protein                                      | PF07250.4  | Glyoxal_oxid_N(Glyoxal oxidase N-terminus)                                                     |
| Supercontig_1.39_MV<br>LG_03873_11sp  | -539,95842 | -539,95784 | 0,00116 | 0,00058 | NS | 0 | 0 | 0 | 0 | 0 | 0 | 0 | 0 | hypothetical protein                                      | PF00892.13 | EamA(EamA-like transporter family)                                                             |
| Supercontig_1.88_MV<br>LG_05885_10sp  | -901,7098  | -901,20619 | 1,00722 | 0,39565 | NS | 0 | 0 | 0 | 0 | 0 | 0 | 0 | 0 | hypothetical protein                                      | PF09420.3  | Nop16(Ribosome biogenesis protein Nop16)                                                       |
| Supercontig_1.101_MV<br>LG_06163_11sp | -579,04685 | -579,04685 | 0       | 0       | NS | 0 | 0 | 0 | 0 | 0 | 0 | 0 | 0 | hypothetical protein                                      | PF08801.4  | Nucleoporin_N(Nup133 N terminal like)                                                          |
| Supercontig_1.1_MVL<br>G_00140_11sp   | -362,78641 | -362,78758 | 0       | 0       | NS | 0 | 0 | 0 | 0 | 0 | 0 | 0 | 0 | hypothetical protein                                      | PF08477.6  | Miro(Miro-like protein)                                                                        |
| Supercontig_1.154_MV<br>LG_06813_9sp  | -586,42796 | -586,42796 | 0       | 0       | NS | 0 | 0 | 0 | 0 | 0 | 0 | 0 | 0 | hypothetical protein                                      | NA         | NA                                                                                             |
| Supercontig_1.125_MV<br>LG_06500_6sp  | -337,65567 | -337,65564 | 0       | 0       | NS | 0 | 0 | 0 | 0 | 0 | 0 | 0 | 0 | cyclin-dependent kinase regulatory subunit                | PF01111.12 | CKS(Cyclin-dependent kinase regulatory subunit)                                                |
| Supercontig_1.142_MV<br>LG_06707_10sp | -1120,6882 | -1120,6882 | 0       | 0       | NS | 0 | 0 | 0 | 0 | 0 | 0 | 0 | 0 | elongator complex protein 3                               | PF00583.17 | Acetyltransf_1(Acetyltransferase (GNAT) family)                                                |
| Supercontig_1.121_MV<br>LG_06430_11sp | -708,04374 | -707,92997 | 0,22754 | 0,10754 | NS | 0 | 0 | 0 | 0 | 0 | 0 | 0 | 0 | hypothetical protein                                      | NA         | NA                                                                                             |
| Supercontig_1.36_MV<br>LG_03664_12sp  | -463,24767 | -461,2295  | 4,03634 | 0,8671  | NS | 0 | 0 | 0 | 0 | 0 | 0 | 0 | 0 | hypothetical protein                                      | NA         | NA                                                                                             |

|                                       |            |            |         |         |    |   |   |   |   |   |                                                                     |            |                                                                          |
|---------------------------------------|------------|------------|---------|---------|----|---|---|---|---|---|---------------------------------------------------------------------|------------|--------------------------------------------------------------------------|
| Supercontig_1.1_MVL<br>G_00193_11sp   | -887,67935 | -886,85468 | 1,64934 | 0,56162 | NS | 0 | 0 | 0 | 0 | 0 | 2-dehydropantoate 2-<br>reductase                                   | TIGR00745  | TIGR00745(apbA_panE: 2-<br>dehydropantoate 2-reductase)                  |
| Supercontig_1.13_MV<br>LG_01916_8sp   | -337,24998 | -336,97181 | 0,55634 | 0,24283 | NS | 0 | 0 | 0 | 0 | 0 | isocitrate lyase                                                    | TIGR01346  | TIGR01346(isocit_lyase:<br>isocitrate lyase)                             |
| Supercontig_1.36_MV<br>LG_03676_9sp   | -702,91488 | -702,77472 | 0,28032 | 0,13078 | NS | 0 | 0 | 0 | 0 | 0 | hypothetical protein                                                | PF00501.21 | AMP-binding(AMP-binding<br>enzyme)                                       |
| Supercontig_1.60_MV<br>LG_04939_12sp  | -691,37874 | -691,37874 | 0       | 0       | NS | 0 | 0 | 0 | 0 | 0 | hypothetical protein                                                | PF03200.9  | Glyco_hydro_63(Mannosyl<br>oligosaccharide glucosidase)                  |
| Supercontig_1.127_MV<br>LG_06534_7sp  | -706,95909 | -706,65152 | 0,61514 | 0,26477 | NS | 0 | 0 | 0 | 0 | 0 | hypothetical protein                                                | PF02469.15 | Fasciclin(Fasciclin domain)                                              |
| Supercontig_1.128_MV<br>LG_06554_10sp | -361,71336 | -361,71336 | 0       | 0       | NS | 0 | 0 | 0 | 0 | 0 | hypothetical protein                                                | NA         | NA                                                                       |
| Supercontig_1.9_MVL<br>G_01539_9sp    | -412,7435  | -412,70516 | 0,07668 | 0,03761 | NS | 0 | 0 | 0 | 0 | 0 | hypothetical protein                                                | NA         | NA                                                                       |
| Supercontig_1.2_MVL<br>G_00289_12sp   | -496,13913 | -496,13913 | 0       | 0       | NS | 0 | 0 | 0 | 0 | 0 | hypothetical protein                                                | PF08123.6  | DOT1(Histone methylation<br>protein DOT1)                                |
| Supercontig_1.45_MV<br>LG_04227_8sp   | -1380,382  | -1379,4775 | 1,80906 | 0,59527 | NS | 0 | 0 | 0 | 0 | 0 | hypothetical protein                                                | PF10257.2  | RA116-like(Retinoic acid induced<br>16-like protein)                     |
| Supercontig_1.186_MV<br>LG_07027_7sp  | -936,98034 | -936,92607 | 0,10854 | 0,05282 | NS | 0 | 0 | 0 | 0 | 0 | protein-L-<br>isoaspartate(D-<br>aspartate) O-<br>methyltransferase | PF06325.6  | PrmA(Ribosomal protein L11<br>methyltransferase (PrmA))                  |
| Supercontig_1.6_MVL<br>G_01212_8sp    | -794,63947 | -794,50149 | 0,27596 | 0,12888 | NS | 0 | 0 | 0 | 0 | 0 | hypothetical protein                                                | PF04752.5  | ChaC(ChaC-like protein)                                                  |
| Supercontig_1.30_MV<br>LG_03266_10sp  | -1556,2826 | -1555,2533 | 2,05864 | 0,64275 | NS | 0 | 0 | 0 | 0 | 0 | hypothetical protein                                                | PF00566.11 | TBC(TBC domain)                                                          |
| Supercontig_1.15_MV<br>LG_02088_12sp  | -417,14186 | -417,1417  | 0,00032 | 0,00016 | NS | 0 | 0 | 0 | 0 | 0 | hypothetical protein                                                | PF00328.15 | Acid_phosphat_A(Histidine acid<br>phosphatase)                           |
| Supercontig_1.4_MVL<br>G_00704_11sp   | -418,44027 | -417,55638 | 1,76778 | 0,58683 | NS | 0 | 0 | 0 | 0 | 0 | hypothetical protein                                                | PF00172.11 | Zn_clus(Fungal Zn(2)-Cys(6)<br>binuclear cluster domain)                 |
| Supercontig_1.74_MV<br>LG_05451_7sp   | -882,20386 | -882,20386 | 0       | 0       | NS | 0 | 0 | 0 | 0 | 0 | hypothetical protein                                                | TIGR01137  | TIGR01137(cysta_beta:<br>cystathionine beta-synthase)                    |
| Supercontig_1.62_MV<br>LG_05021_8sp   | -290,31942 | -290,21063 | 0,21758 | 0,10308 | NS | 0 | 0 | 0 | 0 | 0 | calmodulin                                                          | PF00036.25 | efhand(EF hand)                                                          |
| Supercontig_1.18_MV<br>LG_02356_9sp   | -448,33808 | -448,32864 | 0,01888 | 0,0094  | NS | 0 | 0 | 0 | 0 | 0 | hypothetical protein                                                | TIGR00861  | TIGR00861(MIP: MIP family<br>channel proteins)                           |
| Supercontig_1.34_MV<br>LG_03503_8sp   | -553,10649 | -552,76238 | 0,68822 | 0,29115 | NS | 0 | 0 | 0 | 0 | 0 | hypothetical protein                                                | PF01027.13 | UPF0005(Uncharacterised<br>protein family UPF0005)                       |
| Supercontig_1.23_MV<br>LG_02786_12sp  | -603,66326 | -603,66326 | 0       | 0       | NS | 0 | 0 | 0 | 0 | 0 | hypothetical protein                                                | NA         | NA                                                                       |
| Supercontig_1.2_MVL<br>G_00472_7sp    | -792,11679 | -790,09234 | 4,0489  | 0,86793 | NS | 0 | 0 | 0 | 0 | 0 | hypothetical protein                                                | NA         | NA                                                                       |
| Supercontig_1.56_MV<br>LG_04767_7sp   | -840,8041  | -840,8038  | 0,0006  | 0,0003  | NS | 0 | 0 | 0 | 0 | 0 | hypothetical protein                                                | PF03061.15 | 4HBT(Thioesterase superfamily)                                           |
| Supercontig_1.12_MV<br>LG_01814_8sp   | -1078,5526 | -1078,396  | 0,31308 | 0,1449  | NS | 0 | 0 | 0 | 0 | 0 | glutamate<br>decarboxylase                                          | PF00282.12 | Pyridoxal_deC(Pyridoxal-<br>dependent decarboxylase<br>conserved domain) |
| Supercontig_1.2_MVL<br>G_00292_8sp    | -413,57934 | -413,57933 | 0       | 0       | NS | 0 | 0 | 0 | 0 | 0 | hypothetical protein                                                | PF01467.19 | CTP_transf_2(Cytidylyltransferas<br>e)                                   |
| Supercontig_1.25_MV<br>LG_02921_7sp   | -889,67707 | -889,67697 | 0       | 0       | NS | 0 | 0 | 0 | 0 | 0 | actin-like protein 3                                                | PF00022.12 | Actin(Actin)                                                             |

|                                      |            |            |         |         |    |   |   |   |   |                              |            |                                                                                     |
|--------------------------------------|------------|------------|---------|---------|----|---|---|---|---|------------------------------|------------|-------------------------------------------------------------------------------------|
| Supercontig_1.1_MVL<br>G_00172_9sp   | -409,23035 | -409,22989 | 0,00092 | 0,00046 | NS | 0 | □ | □ | □ | 40S ribosomal protein<br>S18 | PF00416.15 | Ribosomal_S13(Ribosomal<br>protein S13/S18)                                         |
| Supercontig_1.25_MV<br>LG_02962_9sp  | -858,0837  | -858,06837 | 0,03066 | 0,01521 | NS | 0 | □ | □ | □ | hypothetical protein         | PF00380.12 | Ribosomal_S9(Ribosomal<br>protein S9/S16)                                           |
| Supercontig_1.44_MV<br>LG_04157_9sp  | -870,0981  | -869,96644 | 0,26332 | 0,12336 | NS | 0 | □ | □ | □ | hypothetical protein         | NA         | NA                                                                                  |
| Supercontig_1.2_MVL<br>G_00428_6sp   | -417,49593 | -417,41942 | 0,15302 | 0,07366 | NS | 0 | □ | □ | □ | hypothetical protein         | PF06726.5  | BC10(Bladder cancer-related<br>protein BC10)                                        |
| Supercontig_1.186_MV<br>LG_07024_6sp | -1566,3242 | -1564,0856 | 4,4773  | 0,8934  | NS | 0 | □ | □ | □ | hypothetical protein         | PF09814.2  | DUF2351(Uncharacterized<br>conserved protein (DUF2351))                             |
| Supercontig_1.49_MV<br>LG_04415_6sp  | -348,71812 | -348,71812 | 0       | 0       | NS | 0 | □ | □ | □ | hypothetical protein         | NA         | NA                                                                                  |
| Supercontig_1.17_MV<br>LG_02345_10sp | -1108,6242 | -1108,6242 | 0       | 0       | NS | 0 | □ | □ | □ | hypothetical protein         | PF10537.2  | WAC_Acf1_DNA_bd(ATP-<br>utilising chromatin assembly and<br>remodelling N-terminal) |
| Supercontig_1.1_MVL<br>G_00266_7sp   | -1416,2427 | -1416,2427 | 0       | 0       | NS | 0 | □ | □ | □ | hypothetical protein         | NA         | NA                                                                                  |
| Supercontig_1.19_MV<br>LG_02487_9sp  | -1051,3531 | -1051,3531 | 0       | 0       | NS | 0 | □ | □ | □ | hypothetical protein         | NA         | NA                                                                                  |
| Supercontig_1.1_MVL<br>G_00182_10sp  | -798,05244 | -796,76762 | 2,56964 | 0,7233  | NS | 0 | □ | □ | □ | hypothetical protein         | PF03959.6  | FSH1(Serine hydrolase (FSH1))                                                       |
| Supercontig_1.58_MV<br>LG_04877_11sp | -440,95057 | -440,91576 | 0,06962 | 0,03421 | NS | 0 | □ | □ | □ | hypothetical protein         | PF00026.16 | Asp(Eukaryotic aspartyl<br>protease)                                                |
| Supercontig_1.34_MV<br>LG_03505_9sp  | -519,07854 | -519,06858 | 0,01992 | 0,00991 | NS | 0 | □ | □ | □ | hypothetical protein         | PF01853.11 | MOZ_SAS(MOZ/SAS family)                                                             |
| Supercontig_1.18_MV<br>LG_02385_9sp  | -866,52258 | -866,52258 | 0       | 0       | NS | 0 | □ | □ | □ | hypothetical protein         | PF00324.14 | AA_permease(Amino acid<br>permease)                                                 |
| Supercontig_1.78_MV<br>LG_05584_7sp  | -752,53326 | -752,53326 | 0       | 0       | NS | 0 | □ | □ | □ | hypothetical protein         | PF01036.11 | Bac_rhodopsin(Bacteriorhodopsin-<br>like protein)                                   |
| Supercontig_1.22_MV<br>LG_02758_8sp  | -782,02298 | -781,31184 | 1,42228 | 0,50892 | NS | 0 | □ | □ | □ | hypothetical protein         | NA         | NA                                                                                  |
| Supercontig_1.84_MV<br>LG_05754_12sp | -470,15687 | -470,15687 | 0       | 0       | NS | 0 | □ | □ | □ | hypothetical protein         | PF00150.11 | Cellulase(Cellulase (glycosyl<br>hydrolase family 5))                               |
| Supercontig_1.10_MV<br>LG_01648_7sp  | -803,64573 | -803,64573 | 0       | 0       | NS | 0 | □ | □ | □ | hypothetical protein         | PF01399.20 | PCI(PCI domain)                                                                     |
| Supercontig_1.46_MV<br>LG_04284_8sp  | -886,48759 | -885,03913 | 2,89692 | 0,76507 | NS | 0 | □ | □ | □ | hypothetical protein         | NA         | NA                                                                                  |
| Supercontig_1.62_MV<br>LG_05044_9sp  | -670,58522 | -670,58522 | 0       | 0       | NS | 0 | □ | □ | □ | hypothetical protein         | PF01603.13 | B56(Protein phosphatase 2A<br>regulatory B subunit (B56<br>family))                 |
| Supercontig_1.51_MV<br>LG_04501_10sp | -627,70763 | -627,60574 | 0,20378 | 0,09687 | NS | 0 | □ | □ | □ | hypothetical protein         | NA         | NA                                                                                  |
| Supercontig_1.131_MV<br>LG_06589_9sp | -851,42707 | -851,42707 | 0       | 0       | NS | 0 | □ | □ | □ | hypothetical protein         | PF01694.15 | Rhomboid(Rhomboid family)                                                           |
| Supercontig_1.148_MV<br>LG_06755_8sp | -604,93574 | -604,54255 | 0,78638 | 0,3251  | NS | 0 | □ | □ | □ | hypothetical protein         | NA         | NA                                                                                  |
| Supercontig_1.20_MV<br>LG_02525_10sp | -644,38603 | -644,38579 | 0,00048 | 0,00024 | NS | 0 | □ | □ | □ | hypothetical protein         | PF08241.5  | Methyltransf_11(Methyltransferase<br>domain)                                        |
| Supercontig_1.91_MV<br>LG_05926_7sp  | -742,46082 | -740,81112 | 3,2994  | 0,80789 | NS | 0 | □ | □ | □ | hypothetical protein         | PF00076.15 | RRM_1(RNA recognition motif.<br>(a.k.a. RRM, RBD, or RNP<br>domain))                |

|                                      |            |            |         |         |    |   |   |   |   |   |   |   |   |   |   |   |   |   |   |   |                                                                            |            |                                                                 |
|--------------------------------------|------------|------------|---------|---------|----|---|---|---|---|---|---|---|---|---|---|---|---|---|---|---|----------------------------------------------------------------------------|------------|-----------------------------------------------------------------|
| Supercontig_1.10_MV<br>LG_01607_7sp  | -977,73246 | -977,73246 | 0       | 0       | NS | 0 | 0 | 0 | 0 | 0 | 0 | 0 | 0 | 0 | 0 | 0 | 0 | 0 | 0 | 0 | hypothetical protein                                                       | PF04082.11 | Fungal_trans(Fungal specific transcription factor domain)       |
| Supercontig_1.56_MV<br>LG_04779_9sp  | -431,42264 | -431,42264 | 0       | 0       | NS | 0 | 0 | 0 | 0 | 0 | 0 | 0 | 0 | 0 | 0 | 0 | 0 | 0 | 0 | 0 | hypothetical protein                                                       | NA         | NA                                                              |
| Supercontig_1.2_MVL<br>G_00433_11sp  | -788,67314 | -788,67314 | 0       | 0       | NS | 0 | 0 | 0 | 0 | 0 | 0 | 0 | 0 | 0 | 0 | 0 | 0 | 0 | 0 | 0 | hypothetical protein                                                       | PF00533.19 | BRCT(BRCA1 C Terminus (BRCT) domain)                            |
| Supercontig_1.44_MV<br>LG_04170_9sp  | -452,29427 | -451,9781  | 0,63234 | 0,27106 | NS | 0 | 0 | 0 | 0 | 0 | 0 | 0 | 0 | 0 | 0 | 0 | 0 | 0 | 0 | 0 | hypothetical protein                                                       | PF00730.18 | HhH-GPD(HhH-GPD superfamily base excision DNA repair protein)   |
| Supercontig_1.10_MV<br>LG_01626_11sp | -588,64119 | -587,22932 | 2,82374 | 0,75631 | NS | 0 | 0 | 0 | 0 | 0 | 0 | 0 | 0 | 0 | 0 | 0 | 0 | 0 | 0 | 0 | hypothetical protein                                                       | PF08238.5  | Sel1(Sel1 repeat)                                               |
| Supercontig_1.19_MV<br>LG_02464_10sp | -576,76084 | -576,76069 | 0,0003  | 0,00015 | NS | 0 | 0 | 0 | 0 | 0 | 0 | 0 | 0 | 0 | 0 | 0 | 0 | 0 | 0 | 0 | hypothetical protein                                                       | NA         | NA                                                              |
| Supercontig_1.6_MVL<br>G_01208_9sp   | -1064,7414 | -1064,7413 | 0,00016 | 0       | NS | 0 | 0 | 0 | 0 | 0 | 0 | 0 | 0 | 0 | 0 | 0 | 0 | 0 | 0 | 0 | MFS transporter, SIT family, siderophore-iron:H+ symporter                 | NA         | NA                                                              |
| Supercontig_1.42_MV<br>LG_04093_8sp  | -624,93336 | -624,88666 | 0,0934  | 0,04563 | NS | 0 | 0 | 0 | 0 | 0 | 0 | 0 | 0 | 0 | 0 | 0 | 0 | 0 | 0 | 0 | 3-deoxy-7-phosphoheptulonate synthase                                      | TIGR00034  | TIGR00034(aroFGH: 3-deoxy-7-phosphoheptulonate synthase)        |
| Supercontig_1.14_MV<br>LG_01986_6sp  | -650,21711 | -649,03989 | 2,35444 | 0,69187 | NS | 0 | 0 | 0 | 0 | 0 | 0 | 0 | 0 | 0 | 0 | 0 | 0 | 0 | 0 | 0 | hypothetical protein                                                       | NA         | NA                                                              |
| Supercontig_1.16_MV<br>LG_02191_8sp  | -480,96837 | -480,96817 | 0,0004  | 0,0002  | NS | 0 | 0 | 0 | 0 | 0 | 0 | 0 | 0 | 0 | 0 | 0 | 0 | 0 | 0 | 0 | dolichyl-diphosphooligosaccharide-protein glycosyltransferase subunit stt3 | PF02516.7  | STT3(Oligosaccharyl transferase STT3 subunit)                   |
| Supercontig_1.4_MVL<br>G_00699_8sp   | -578,92609 | -578,92609 | 0       | 0       | NS | 0 | 0 | 0 | 0 | 0 | 0 | 0 | 0 | 0 | 0 | 0 | 0 | 0 | 0 | 0 | non-specific lipid-transfer protein                                        | PF00108.16 | Thiolase_N(Thiolase, N-terminal domain)                         |
| Supercontig_1.11_MV<br>LG_01700_8sp  | -350,86122 | -350,86122 | 0       | 0       | NS | 0 | 0 | 0 | 0 | 0 | 0 | 0 | 0 | 0 | 0 | 0 | 0 | 0 | 0 | 0 | hypothetical protein                                                       | NA         | NA                                                              |
| Supercontig_1.69_MV<br>LG_05286_8sp  | -404,17329 | -404,11793 | 0,11072 | 0,05386 | NS | 0 | 0 | 0 | 0 | 0 | 0 | 0 | 0 | 0 | 0 | 0 | 0 | 0 | 0 | 0 | hypothetical protein                                                       | NA         | NA                                                              |
| Supercontig_1.97_MV<br>LG_06058_7sp  | -406,09723 | -405,72357 | 0,74732 | 0,31179 | NS | 0 | 0 | 0 | 0 | 0 | 0 | 0 | 0 | 0 | 0 | 0 | 0 | 0 | 0 | 0 | hypothetical protein                                                       | PF01451.14 | LMWPc(Low molecular weight phosphotyrosine protein phosphatase) |
| Supercontig_1.56_MV<br>LG_04787_9sp  | -408,54751 | -408,5475  | 0       | 0       | NS | 0 | 0 | 0 | 0 | 0 | 0 | 0 | 0 | 0 | 0 | 0 | 0 | 0 | 0 | 0 | hypothetical protein                                                       | NA         | NA                                                              |
| Supercontig_1.74_MV<br>LG_05449_7sp  | -565,93454 | -564,41897 | 3,03114 | 0,78032 | NS | 0 | 0 | 0 | 0 | 0 | 0 | 0 | 0 | 0 | 0 | 0 | 0 | 0 | 0 | 0 | methylcrotonoyl-CoA carboxylase beta chain                                 | PF01039.15 | Carboxyl_trans(Carboxyl transferase domain)                     |
| Supercontig_1.29_MV<br>LG_03223_10sp | -721,13681 | -719,09859 | 4,07644 | 0,86974 | NS | 0 | 0 | 0 | 0 | 0 | 0 | 0 | 0 | 0 | 0 | 0 | 0 | 0 | 0 | 0 | hypothetical protein                                                       | PF03847.6  | TFIID_20kDa(Transcription initiation factor TFIID subunit A)    |
| Supercontig_1.75_MV<br>LG_05488_9sp  | -399,68836 | -399,68827 | 0,00018 | 0       | NS | 0 | 0 | 0 | 0 | 0 | 0 | 0 | 0 | 0 | 0 | 0 | 0 | 0 | 0 | 0 | hypothetical protein                                                       | PF07728.7  | AAA_5(AAA domain (dynein-related subfamily))                    |
| Supercontig_1.175_MV<br>LG_06970_9sp | -689,86479 | -689,86479 | 0       | 0       | NS | 0 | 0 | 0 | 0 | 0 | 0 | 0 | 0 | 0 | 0 | 0 | 0 | 0 | 0 | 0 | enoyl-CoA hydratase                                                        | PF00378.13 | ECH(Enoyl-CoA hydratase/isomerase family)                       |
| Supercontig_1.200_MV<br>LG_07083_9sp | -714,6586  | -714,57285 | 0,1715  | 0,08218 | NS | 0 | 0 | 0 | 0 | 0 | 0 | 0 | 0 | 0 | 0 | 0 | 0 | 0 | 0 | 0 | hypothetical protein                                                       | PF02678.9  | Pirin(Pirin)                                                    |
| Supercontig_1.76_MV<br>LG_05533_8sp  | -511,48381 | -511,48381 | 0       | 0       | NS | 0 | 0 | 0 | 0 | 0 | 0 | 0 | 0 | 0 | 0 | 0 | 0 | 0 | 0 | 0 | hypothetical protein                                                       | NA         | NA                                                              |

|                                      |            |            |         |         |    |   |   |   |   |   |                                                                |            |                                                                           |
|--------------------------------------|------------|------------|---------|---------|----|---|---|---|---|---|----------------------------------------------------------------|------------|---------------------------------------------------------------------------|
| Supercontig_1.31_MV<br>LG_03378_10sp | -673,82687 | -673,82687 | 0       | 0       | NS | 0 | 0 | 0 | 0 | 0 | hypothetical protein                                           | NA         | NA                                                                        |
| Supercontig_1.46_MV<br>LG_04246_10sp | -419,44453 | -419,44453 | 0       | 0       | NS | 0 | 0 | 0 | 0 | 0 | hypothetical protein                                           | PF03901.10 | Glyco_transf_22(Alg9-like<br>mannosyltransferase family)                  |
| Supercontig_1.24_MV<br>LG_02833_10sp | -674,43537 | -674,43537 | 0       | 0       | NS | 0 | 0 | 0 | 0 | 0 | hypothetical protein                                           | PF00400.25 | WD40(WD domain, G-beta<br>repeat)                                         |
| Supercontig_1.4_MVL<br>G_00815_7sp   | -341,22688 | -339,62274 | 3,20828 | 0,79894 | NS | 0 | 0 | 0 | 0 | 0 | hypothetical protein                                           | PF05730.4  | CFEM(CFEM domain)                                                         |
| Supercontig_1.17_MV<br>LG_02337_9sp  | -513,3031  | -513,14901 | 0,30818 | 0,14281 | NS | 0 | 0 | 0 | 0 | 0 | hypothetical protein                                           | NA         | NA                                                                        |
| Supercontig_1.1_MVL<br>G_00039_7sp   | -469,50313 | -469,32322 | 0,35982 | 0,16465 | NS | 0 | 0 | 0 | 0 | 0 | hypothetical protein                                           | NA         | NA                                                                        |
| Supercontig_1.19_MV<br>LG_02499_11sp | -672,19663 | -670,01287 | 4,36752 | 0,88738 | NS | 0 | 0 | 0 | 0 | 0 | hypothetical protein                                           | PF07967.6  | zf-C3HC(C3HC zinc finger-like)                                            |
| Supercontig_1.6_MVL<br>G_01087_10sp  | -583,5796  | -582,89801 | 1,36318 | 0,49419 | NS | 0 | 0 | 0 | 0 | 0 | hypothetical protein                                           | PF08294.4  | TIM21(TIM21)                                                              |
| Supercontig_1.15_MV<br>LG_02114_6sp  | -576,9833  | -576,98293 | 0,00074 | 0,00037 | NS | 0 | 0 | 0 | 0 | 0 | dynactin 5                                                     | PF00132.17 | Hexapep(Bacterial transferase<br>hexapeptide (three repeats))             |
| Supercontig_1.6_MVL<br>G_01076_12sp  | -968,39393 | -968,39393 | 0       | 0       | NS | 0 | 0 | 0 | 0 | 0 | hypothetical protein                                           | PF00270.22 | DEAD(DEAD/DEAH box<br>helicase)                                           |
| Supercontig_1.34_MV<br>LG_03558_8sp  | -932,29812 | -932,07009 | 0,45606 | 0,2039  | NS | 0 | 0 | 0 | 0 | 0 | hypothetical protein                                           | PF02845.9  | CUE(CUE domain)                                                           |
| Supercontig_1.29_MV<br>LG_03239_10sp | -416,42273 | -416,42257 | 0,00032 | 0,00016 | NS | 0 | 0 | 0 | 0 | 0 | eukaryotic translation<br>initiation factor 2<br>subunit gamma | PF09173.4  | eIF2_C(Initiation factor eIF2<br>gamma, C terminal)                       |
| Supercontig_1.86_MV<br>LG_05834_8sp  | -764,68729 | -764,68729 | 0       | 0       | NS | 0 | 0 | 0 | 0 | 0 | hypothetical protein                                           | PF04479.6  | RTA1(RTA1 like protein)                                                   |
| Supercontig_1.46_MV<br>LG_04291_7sp  | -557,27441 | -556,36932 | 1,81018 | 0,59549 | NS | 0 | 0 | 0 | 0 | 0 | hypothetical protein                                           | PF03540.6  | TFIID_30kDa(Transcription<br>initiation factor TFIID 23-30kDa<br>subunit) |
| Supercontig_1.112_MV<br>LG_06326_6sp | -634,58406 | -634,58387 | 0,00038 | 0,00019 | NS | 0 | 0 | 0 | 0 | 0 | hypothetical protein                                           | PF05495.5  | zf-CHY(CHY zinc finger)                                                   |
| Supercontig_1.85_MV<br>LG_05808_10sp | -589,76459 | -589,76459 | 0       | 0       | NS | 0 | 0 | 0 | 0 | 0 | hypothetical protein                                           | PF08774.4  | VRR_NUC(VRR-NUC domain)                                                   |
| Supercontig_1.28_MV<br>LG_03141_6sp  | -990,68999 | -990,50957 | 0,36084 | 0,16508 | NS | 0 | 0 | 0 | 0 | 0 | hypothetical protein                                           | NA         | NA                                                                        |
| Supercontig_1.61_MV<br>LG_04981_8sp  | -804,16114 | -803,39765 | 1,52698 | 0,53396 | NS | 0 | 0 | 0 | 0 | 0 | hypothetical protein                                           | PF00326.14 | Peptidase_S9(Prolyl<br>oligopeptidase family)                             |
| Supercontig_1.2_MVL<br>G_00421_10sp  | -350,61481 | -350,61474 | 0,00014 | 0       | NS | 0 | 0 | 0 | 0 | 0 | hypothetical protein                                           | PF08539.4  | HbrB(HbrB-like)                                                           |
| Supercontig_1.31_MV<br>LG_03357_12sp | -588,80774 | -588,80198 | 0,01152 | 0,00574 | NS | 0 | 0 | 0 | 0 | 0 | hypothetical protein                                           | PF00995.16 | Sec1(Sec1 family)                                                         |
| Supercontig_1.17_MV<br>LG_02293_9sp  | -615,08067 | -615,08067 | 0       | 0       | NS | 0 | 0 | 0 | 0 | 0 | hypothetical protein                                           | PF03330.11 | DPBB_1(Rare lipoprotein A<br>(RlpA)-like double-psi beta-<br>barrel)      |
| Supercontig_1.19_MV<br>LG_02486_6sp  | -711,75855 | -711,43781 | 0,64148 | 0,27439 | NS | 0 | 0 | 0 | 0 | 0 | hypothetical protein                                           | PF05742.5  | DUF833(Protein of unknown<br>function (DUF833))                           |
| Supercontig_1.4_MVL<br>G_00819_10sp  | -637,3668  | -637,3668  | 0       | 0       | NS | 0 | 0 | 0 | 0 | 0 | hypothetical protein                                           | PF07958.4  | DUF1688(Protein of unknown<br>function (DUF1688))                         |

|                                       |            |            |         |         |    |   |   |   |   |   |   |   |   |   |   |   |   |   |                                              |            |                                                                                      |
|---------------------------------------|------------|------------|---------|---------|----|---|---|---|---|---|---|---|---|---|---|---|---|---|----------------------------------------------|------------|--------------------------------------------------------------------------------------|
| Supercontig_1.18_MV<br>LG_02407_10sp  | -836,10501 | -836,10501 | 0       | 0       | NS | 0 | 0 | 0 | 0 | 0 | 0 | 0 | 0 | 0 | 0 | 0 | 0 | 0 | hypothetical protein                         | PF05182.6  | Fip1(Fip1 motif)                                                                     |
| Supercontig_1.1_MVL<br>G_00267_8sp    | -511,05531 | -511,05521 | 0,0002  | 0       | NS | 0 | 0 | 0 | 0 | 0 | 0 | 0 | 0 | 0 | 0 | 0 | 0 | 0 | hypothetical protein                         | NA         | NA                                                                                   |
| Supercontig_1.35_MV<br>LG_03630_12sp  | -1394,7291 | -1394,7291 | 0       | 0       | NS | 0 | 0 | 0 | 0 | 0 | 0 | 0 | 0 | 0 | 0 | 0 | 0 | 0 | STE/STE11/CDC15<br>protein kinase            | PF07714.10 | Pkinase_Tyr(Protein tyrosine<br>kinase)                                              |
| Supercontig_1.32_MV<br>LG_03439_8sp   | -408,2181  | -407,82334 | 0,78952 | 0,32616 | NS | 0 | 0 | 0 | 0 | 0 | 0 | 0 | 0 | 0 | 0 | 0 | 0 | 0 | hypothetical protein                         | PF00475.11 | IGPD(Imidazoleglycerol-<br>phosphate dehydratase)                                    |
| Supercontig_1.5_MVL<br>G_00995_10sp   | -401,60937 | -401,60937 | 0       | 0       | NS | 0 | 0 | 0 | 0 | 0 | 0 | 0 | 0 | 0 | 0 | 0 | 0 | 0 | hypothetical protein                         | PF00929.17 | Exonuc_X-T(Exonuclease)                                                              |
| Supercontig_1.48_MV<br>LG_04391_9sp   | -571,15402 | -571,15374 | 0,00056 | 0,00028 | NS | 0 | 0 | 0 | 0 | 0 | 0 | 0 | 0 | 0 | 0 | 0 | 0 | 0 | hypothetical protein                         | NA         | NA                                                                                   |
| Supercontig_1.12_MV<br>LG_01846_8sp   | -500,69436 | -500,67825 | 0,03222 | 0,01598 | NS | 0 | 0 | 0 | 0 | 0 | 0 | 0 | 0 | 0 | 0 | 0 | 0 | 0 | hypothetical protein                         | PF00153.20 | Mito_carr(Mitochondrial carrier<br>protein)                                          |
| Supercontig_1.20_MV<br>LG_02575_6sp   | -822,44455 | -822,44455 | 0       | 0       | NS | 0 | 0 | 0 | 0 | 0 | 0 | 0 | 0 | 0 | 0 | 0 | 0 | 0 | galactose-1-phosphate<br>uridylyltransferase | PF02744.10 | GalP_UDP_tr_C(Galactose-1-<br>phosphate uridylyl transferase, C-<br>terminal domain) |
| Supercontig_1.1_MVL<br>G_00056_7sp    | -597,95409 | -596,25711 | 3,39396 | 0,81676 | NS | 0 | 0 | 0 | 0 | 0 | 0 | 0 | 0 | 0 | 0 | 0 | 0 | 0 | hypothetical protein                         | PF07524.6  | Bromo_TP(Bromodomain<br>associated)                                                  |
| Supercontig_1.11_MV<br>LG_01776_6sp   | -1062,9863 | -1062,5329 | 0,90676 | 0,36452 | NS | 0 | 0 | 0 | 0 | 0 | 0 | 0 | 0 | 0 | 0 | 0 | 0 | 0 | hypothetical protein                         | NA         | NA                                                                                   |
| Supercontig_1.17_MV<br>LG_02283_10sp  | -973,94025 | -972,09707 | 3,68636 | 0,84169 | NS | 0 | 0 | 0 | 0 | 0 | 0 | 0 | 0 | 0 | 0 | 0 | 0 | 0 | hypothetical protein                         | PF00188.19 | CAP(Cysteine-rich secretory<br>protein family)                                       |
| Supercontig_1.9_MVL<br>G_01479_9sp    | -609,49536 | -609,49536 | 0       | 0       | NS | 0 | 0 | 0 | 0 | 0 | 0 | 0 | 0 | 0 | 0 | 0 | 0 | 0 | 60S ribosomal protein<br>L11-B               | PF00281.12 | Ribosomal_L5(Ribosomal protein<br>L5)                                                |
| Supercontig_1.7_MVL<br>G_01279_10sp   | -376,28793 | -376,28793 | 0       | 0       | NS | 0 | 0 | 0 | 0 | 0 | 0 | 0 | 0 | 0 | 0 | 0 | 0 | 0 | hypothetical protein                         | TIGR00880  | TIGR00880(2_A_01_02:<br>Multidrug resistance protein)                                |
| Supercontig_1.1_MVL<br>G_00019_11sp   | -354,41897 | -354,41889 | 0       | 0       | NS | 0 | 0 | 0 | 0 | 0 | 0 | 0 | 0 | 0 | 0 | 0 | 0 | 0 | hypothetical protein                         | PF01244.14 | Peptidase_M19(Membrane<br>dipeptidase (Peptidase family<br>M19))                     |
| Supercontig_1.23_MV<br>LG_02773_8sp   | -425,15678 | -425,15678 | 0       | 0       | NS | 0 | 0 | 0 | 0 | 0 | 0 | 0 | 0 | 0 | 0 | 0 | 0 | 0 | hypothetical protein                         | PF00484.12 | Pro_CA(Carbonic anhydrase)                                                           |
| Supercontig_1.21_MV<br>LG_02613_11sp  | -393,7189  | -393,71864 | 0       | 0       | NS | 0 | 0 | 0 | 0 | 0 | 0 | 0 | 0 | 0 | 0 | 0 | 0 | 0 | hypothetical protein                         | PF07534.9  | TLD(TLD)                                                                             |
| Supercontig_1.17_MV<br>LG_02336_6sp   | -487,48643 | -487,48639 | 0       | 0       | NS | 0 | 0 | 0 | 0 | 0 | 0 | 0 | 0 | 0 | 0 | 0 | 0 | 0 | hypothetical protein                         | PF00664.16 | ABC_membrane(ABC<br>transporter transmembrane<br>region)                             |
| Supercontig_1.49_MV<br>LG_04425_9sp   | -417,14314 | -417,14312 | 0       | 0       | NS | 0 | 0 | 0 | 0 | 0 | 0 | 0 | 0 | 0 | 0 | 0 | 0 | 0 | hypothetical protein                         | PF04181.6  | RPAP2_Rtr1(Rtr1/RPAP2 family)                                                        |
| Supercontig_1.2_MVL<br>G_00361_9sp    | -750,50369 | -750,44965 | 0,10808 | 0,05261 | NS | 0 | 0 | 0 | 0 | 0 | 0 | 0 | 0 | 0 | 0 | 0 | 0 | 0 | hypothetical protein                         | PF02194.8  | PXA(PXA domain)                                                                      |
| Supercontig_1.5_MVL<br>G_00996_12sp   | -467,6903  | -467,69008 | 0,00044 | 0,00022 | NS | 0 | 0 | 0 | 0 | 0 | 0 | 0 | 0 | 0 | 0 | 0 | 0 | 0 | hypothetical protein                         | PF01479.18 | S4(S4 domain)                                                                        |
| Supercontig_1.28_MV<br>LG_03184_12sp  | -382,37101 | -382,37101 | 0       | 0       | NS | 0 | 0 | 0 | 0 | 0 | 0 | 0 | 0 | 0 | 0 | 0 | 0 | 0 | hypothetical protein                         | PF03009.10 | GDPD(Glycerophosphoryl<br>diester phosphodiesterase<br>family)                       |
| Supercontig_1.11_MV<br>LG_01763_6sp   | -901,48208 | -901,48208 | 0       | 0       | NS | 0 | 0 | 0 | 0 | 0 | 0 | 0 | 0 | 0 | 0 | 0 | 0 | 0 | hypothetical protein                         | PF00753.20 | Lactamase_B(Metallo-beta-<br>lactamase superfamily)                                  |
| Supercontig_1.307_MV<br>LG_07237_10sp | -328,38759 | -328,38759 | 0       | 0       | NS | 0 | 0 | 0 | 0 | 0 | 0 | 0 | 0 | 0 | 0 | 0 | 0 | 0 | hypothetical protein                         | PF00107.19 | ADH_zinc_N(Zinc-binding<br>dehydrogenase)                                            |
| Supercontig_1.21_MV<br>LG_02611_7sp   | -525,72738 | -525,72738 | 0       | 0       | NS | 0 | 0 | 0 | 0 | 0 | 0 | 0 | 0 | 0 | 0 | 0 | 0 | 0 | hypothetical protein                         | PF02311.12 | AraC_binding(AraC-like ligand<br>binding domain)                                     |

|                                       |            |            |         |         |    |   |  |  |  |  |                      |            |                                                                |
|---------------------------------------|------------|------------|---------|---------|----|---|--|--|--|--|----------------------|------------|----------------------------------------------------------------|
| Supercontig_1.236_MV<br>LG_07197_11sp | -630,21115 | -629,36731 | 1,68768 | 0,56994 | NS | 0 |  |  |  |  | hypothetical protein | NA         | NA                                                             |
| Supercontig_1.212_MV<br>LG_07129_9sp  | -1095,4388 | -1094,9323 | 1,01308 | 0,39742 | NS | 0 |  |  |  |  | hypothetical protein | PF00400.25 | WD40(WD domain, G-beta repeat)                                 |
| Supercontig_1.161_MV<br>LG_06867_10sp | -816,5649  | -814,56499 | 3,99982 | 0,86465 | NS | 0 |  |  |  |  | hypothetical protein | PF10374.2  | EST1(Telomerase activating protein Est1)                       |
| Supercontig_1.45_MV<br>LG_04210_7sp   | -1367,67   | -1365,2944 | 4,7511  | 0,90704 | *  | 0 |  |  |  |  | hypothetical protein | PF04129.5  | Vps52(Vps52 / Sac2 family)                                     |
| Supercontig_1.4_MVL<br>G_00836_6sp    | -987,47628 | -986,37482 | 2,20292 | 0,66761 | NS | 0 |  |  |  |  | hypothetical protein | PF00076.15 | RRM_1(RNA recognition motif. (a.k.a. RRM, RBD, or RNP domain)) |
| Supercontig_1.61_MV<br>LG_04968_11sp  | -586,87532 | -586,87532 | 0       | 0       | NS | 0 |  |  |  |  | hypothetical protein | NA         | NA                                                             |
| Supercontig_1.1_MVL<br>G_00122_10sp   | -386,9094  | -386,9094  | 0       | 0       | NS | 0 |  |  |  |  | hypothetical protein | NA         | NA                                                             |
| Supercontig_1.1_MVL<br>G_00134_9sp    | -1030,9149 | -1030,8487 | 0,13256 | 0,06413 | NS | 0 |  |  |  |  | hypothetical protein | NA         | NA                                                             |
| Supercontig_1.67_MV<br>LG_05244_8sp   | -913,25856 | -913,21483 | 0,08746 | 0,04279 | NS | 0 |  |  |  |  | hypothetical protein | PF00501.21 | AMP-binding(AMP-binding enzyme)                                |
| Supercontig_1.36_MV<br>LG_03663_8sp   | -568,6958  | -568,08732 | 1,21696 | 0,45582 | NS | 0 |  |  |  |  | hypothetical protein | PF01008.10 | IF-2B(Initiation factor 2 subunit family)                      |
| Supercontig_1.1_MVL<br>G_00047_11sp   | -569,97718 | -569,97714 | 0       | 0       | NS | 0 |  |  |  |  | hypothetical protein | NA         | NA                                                             |
| Supercontig_1.18_MV<br>LG_02363_8sp   | -252,07763 | -251,71772 | 0,71982 | 0,30226 | NS | 0 |  |  |  |  | hypothetical protein | PF08609.3  | Fes1(Nucleotide exchange factor Fes1)                          |
| Supercontig_1.24_MV<br>LG_02906_6sp   | -586,88435 | -586,53182 | 0,70506 | 0,29709 | NS | 0 |  |  |  |  | hypothetical protein | PF00860.13 | Xan_ur_permease(Permease family)                               |
| Supercontig_1.60_MV<br>LG_04932_7sp   | -350,47986 | -350,47986 | 0       | 0       | NS | 0 |  |  |  |  | hypothetical protein | PF04800.5  | ETC_C1_NDUFA4(ETC complex I subunit conserved region)          |
| Supercontig_1.39_MV<br>LG_03897_9sp   | -625,79462 | -625,79458 | 0       | 0       | NS | 0 |  |  |  |  | hypothetical protein | PF00439.18 | Bromodomain(Bromodomain)                                       |
| Supercontig_1.197_MV<br>LG_07073_6sp  | -458,02792 | -458,0279  | 0       | 0       | NS | 0 |  |  |  |  | hypothetical protein | PF01105.17 | EMP24_GP25L(emp24/gp25L/p24 family/GOLD)                       |
| Supercontig_1.31_MV<br>LG_03362_7sp   | -350,13972 | -349,21998 | 1,83948 | 0,60138 | NS | 0 |  |  |  |  | hypothetical protein | NA         | NA                                                             |
| Supercontig_1.1_MVL<br>G_00218_7sp    | -640,32295 | -639,03435 | 2,5772  | 0,72434 | NS | 0 |  |  |  |  | hypothetical protein | PF10262.2  | Rdx(Rdx family)                                                |
| Supercontig_1.1_MVL<br>G_00050_7sp    | -537,11035 | -536,70816 | 0,80438 | 0,33115 | NS | 0 |  |  |  |  | hypothetical protein | PF04979.7  | IPP-2(Protein phosphatase inhibitor 2 (IPP-2))                 |
| Supercontig_1.4_MVL<br>G_00820_8sp    | -861,32738 | -857,13883 | 8,3771  | 0,98483 | ** | 0 |  |  |  |  | hypothetical protein | NA         | NA                                                             |
| Supercontig_1.26_MV<br>LG_03042_9sp   | -471,23347 | -471,23347 | 0       | 0       | NS | 0 |  |  |  |  | hypothetical protein | PF03291.9  | Pox_MCEL(mRNA capping enzyme)                                  |
| Supercontig_1.28_MV<br>LG_03186_10sp  | -1107,4484 | -1107,4484 | 0       | 0       | NS | 0 |  |  |  |  | hypothetical protein | PF07034.4  | ORC3_N(Origin recognition complex (ORC) subunit 3 N-terminus)  |
| Supercontig_1.22_MV<br>LG_02733_9sp   | -573,47792 | -573,47788 | 0       | 0       | NS | 0 |  |  |  |  | hypothetical protein | TIGR01358  | DAHP_synth_II: 3-deoxy-7-phosphoheptulonate synthase)          |

|                                      |            |            |         |         |    |   |   |   |   |   |   |   |   |   |   |   |   |   |   |   |                                                    |            |                                                                              |
|--------------------------------------|------------|------------|---------|---------|----|---|---|---|---|---|---|---|---|---|---|---|---|---|---|---|----------------------------------------------------|------------|------------------------------------------------------------------------------|
| Supercontig_1.24_MV<br>LG_02905_7sp  | -767,90294 | -767,08779 | 1,6303  | 0,55743 | NS | 0 | 0 | 0 | 0 | 0 | 0 | 0 | 0 | 0 | 0 | 0 | 0 | 0 | 0 | 0 | electron transfer<br>flavoprotein alpha<br>subunit | PF00766.12 | ETF_alpha(Electron transfer<br>flavoprotein FAD-binding<br>domain)           |
| Supercontig_1.6_MVL<br>G_01182_7sp   | -495,33384 | -495,33384 | 0       | 0       | NS | 0 | 0 | 0 | 0 | 0 | 0 | 0 | 0 | 0 | 0 | 0 | 0 | 0 | 0 | 0 | hypothetical protein                               | PF01730.9  | UreF(UreF)                                                                   |
| Supercontig_1.25_MV<br>LG_02939_9sp  | -585,90639 | -585,90588 | 0,00102 | 0,00051 | NS | 0 | 0 | 0 | 0 | 0 | 0 | 0 | 0 | 0 | 0 | 0 | 0 | 0 | 0 | 0 | kinesin heavy chain                                | PF00225.16 | Kinesin(Kinesin motor domain)                                                |
| Supercontig_1.87_MV<br>LG_05856_7sp  | -344,81238 | -344,81234 | 0       | 0       | NS | 0 | 0 | 0 | 0 | 0 | 0 | 0 | 0 | 0 | 0 | 0 | 0 | 0 | 0 | 0 | hypothetical protein                               | PF03171.13 | 2OG-Fel_Oxy(2OG-Fe(II)<br>oxygenase superfamily)                             |
| Supercontig_1.94_MV<br>LG_05995_9sp  | -512,48382 | -512,00536 | 0,95692 | 0,38026 | NS | 0 | 0 | 0 | 0 | 0 | 0 | 0 | 0 | 0 | 0 | 0 | 0 | 0 | 0 | 0 | hypothetical protein                               | NA         | NA                                                                           |
| Supercontig_1.15_MV<br>LG_02136_9sp  | -691,88507 | -691,88507 | 0       | 0       | NS | 0 | 0 | 0 | 0 | 0 | 0 | 0 | 0 | 0 | 0 | 0 | 0 | 0 | 0 | 0 | hypothetical protein                               | PF00339.22 | Arrestin_N(Arrestin (or S-<br>antigen), N-terminal domain)                   |
| Supercontig_1.5_MVL<br>G_00979_6sp   | -458,90851 | -458,9085  | 0       | 0       | NS | 0 | 0 | 0 | 0 | 0 | 0 | 0 | 0 | 0 | 0 | 0 | 0 | 0 | 0 | 0 | hypothetical protein                               | TIGR00556  | TIGR00556(pantethn_trn:<br>phosphopantethiene-protein<br>transferase domain) |
| Supercontig_1.74_MV<br>LG_05461_7sp  | -622,62248 | -622,62248 | 0       | 0       | NS | 0 | 0 | 0 | 0 | 0 | 0 | 0 | 0 | 0 | 0 | 0 | 0 | 0 | 0 | 0 | hypothetical protein                               | PF01066.14 | CDP-OH_P_transf(CDP-alcohol<br>phosphatidyltransferase)                      |
| Supercontig_1.140_MV<br>LG_06680_7sp | -345,10869 | -344,28222 | 1,65294 | 0,56241 | NS | 0 | 0 | 0 | 0 | 0 | 0 | 0 | 0 | 0 | 0 | 0 | 0 | 0 | 0 | 0 | ubiquitin-conjugating<br>enzyme E2 35              | PF00179.19 | UQ_con(Ubiquitin-conjugating<br>enzyme)                                      |
| Supercontig_1.42_MV<br>LG_04089_6sp  | -496,70653 | -496,53251 | 0,34804 | 0,15972 | NS | 0 | 0 | 0 | 0 | 0 | 0 | 0 | 0 | 0 | 0 | 0 | 0 | 0 | 0 | 0 | hypothetical protein                               | PF06201.6  | PITH(C-terminal proteasome-<br>interacting domain of thioredoxin-<br>like)   |
| Supercontig_1.53_MV<br>LG_04642_6sp  | -476,7959  | -476,7959  | 0       | 0       | NS | 0 | 0 | 0 | 0 | 0 | 0 | 0 | 0 | 0 | 0 | 0 | 0 | 0 | 0 | 0 | hypothetical protein                               | NA         | NA                                                                           |
| Supercontig_1.7_MVL<br>G_01357_8sp   | -541,09212 | -541,09212 | 0       | 0       | NS | 0 | 0 | 0 | 0 | 0 | 0 | 0 | 0 | 0 | 0 | 0 | 0 | 0 | 0 | 0 | hypothetical protein                               | PF10250.2  | O-FucT(GDP-fucose protein O-<br>fucosyltransferase)                          |
| Supercontig_1.79_MV<br>LG_05625_9sp  | -489,43284 | -489,43276 | 0,00016 | 0       | NS | 0 | 0 | 0 | 0 | 0 | 0 | 0 | 0 | 0 | 0 | 0 | 0 | 0 | 0 | 0 | acetoacetate-CoA<br>ligase                         | TIGR01217  | TIGR01217(ac_ac_CoA_syn:<br>acetoacetate-CoA ligase)                         |
| Supercontig_1.28_MV<br>LG_03135_7sp  | -404,75002 | -404,11473 | 1,27058 | 0,47022 | NS | 0 | 0 | 0 | 0 | 0 | 0 | 0 | 0 | 0 | 0 | 0 | 0 | 0 | 0 | 0 | hypothetical protein                               | TIGR03421  | TIGR03421(FeS_CyaY: iron<br>donor protein CyaY)                              |
| Supercontig_1.12_MV<br>LG_01806_11sp | -551,6594  | -551,6593  | 0,0002  | 0       | NS | 0 | 0 | 0 | 0 | 0 | 0 | 0 | 0 | 0 | 0 | 0 | 0 | 0 | 0 | 0 | hypothetical protein                               | PF10230.2  | DUF2305(Uncharacterised<br>conserved protein (DUF2305))                      |
| Supercontig_1.48_MV<br>LG_04397_9sp  | -401,84555 | -401,84555 | 0       | 0       | NS | 0 | 0 | 0 | 0 | 0 | 0 | 0 | 0 | 0 | 0 | 0 | 0 | 0 | 0 | 0 | hypothetical protein                               | PF02297.10 | COX6B(Cytochrome oxidase c<br>subunit VIb)                                   |
| Supercontig_1.128_MV<br>LG_06551_6sp | -786,42956 | -786,02087 | 0,81738 | 0,33548 | NS | 0 | 0 | 0 | 0 | 0 | 0 | 0 | 0 | 0 | 0 | 0 | 0 | 0 | 0 | 0 | hypothetical protein                               | PF07950.4  | DUF1691(Protein of unknown<br>function (DUF1691))                            |
| Supercontig_1.16_MV<br>LG_02200_8sp  | -910,6133  | -910,6133  | 0       | 0       | NS | 0 | 0 | 0 | 0 | 0 | 0 | 0 | 0 | 0 | 0 | 0 | 0 | 0 | 0 | 0 | T-complex protein 1<br>subunit epsilon             | TIGR02343  | TIGR02343(chap_CCT_epsilon: T-<br>complex protein 1, epsilon<br>subunit)     |
| Supercontig_1.4_MVL<br>G_00799_7sp   | -642,911   | -642,43571 | 0,95058 | 0,3783  | NS | 0 | 0 | 0 | 0 | 0 | 0 | 0 | 0 | 0 | 0 | 0 | 0 | 0 | 0 | 0 | hypothetical protein                               | PF02800.13 | Gp_dh_C(Glyceraldehyde 3-<br>phosphate dehydrogenase, C-<br>terminal domain) |
| Supercontig_1.34_MV<br>LG_03511_11sp | -370,81579 | -369,2641  | 3,10338 | 0,78811 | NS | 0 | 0 | 0 | 0 | 0 | 0 | 0 | 0 | 0 | 0 | 0 | 0 | 0 | 0 | 0 | hypothetical protein                               | PF05615.6  | THOC7(Tho complex subunit 7)                                                 |
| Supercontig_1.54_MV<br>LG_04671_11sp | -760,68556 | -759,81076 | 1,7496  | 0,58305 | NS | 0 | 0 | 0 | 0 | 0 | 0 | 0 | 0 | 0 | 0 | 0 | 0 | 0 | 0 | 0 | hypothetical protein                               | PF01068.14 | DNA_ligase_A_M(ATP<br>dependent DNA ligase domain)                           |
| Supercontig_1.16_MV<br>LG_02223_9sp  | -773,333   | -771,81213 | 3,04174 | 0,78148 | NS | 0 | 0 | 0 | 0 | 0 | 0 | 0 | 0 | 0 | 0 | 0 | 0 | 0 | 0 | 0 | hypothetical protein                               | PF06745.6  | KaiC(KaiC)                                                                   |



|                                       |            |            |         |         |    |   |  |  |  |                                                   |            |                                                                                                     |
|---------------------------------------|------------|------------|---------|---------|----|---|--|--|--|---------------------------------------------------|------------|-----------------------------------------------------------------------------------------------------|
| Supercontig_1.2_MVL<br>G_00377_12sp   | -528,2446  | -528,24439 | 0,00042 | 0,00021 | NS | 0 |  |  |  | hypothetical protein                              | PF01546.21 | Peptidase_M20(Peptidase family M20/M25/M40)                                                         |
| Supercontig_1.22_MV<br>LG_02725_6sp   | -767,09454 | -766,82945 | 0,53018 | 0,23286 | NS | 0 |  |  |  | hypothetical protein                              | NA         | NA                                                                                                  |
| Supercontig_1.2_MVL<br>G_00385_8sp    | -617,66465 | -617,37232 | 0,58466 | 0,25348 | NS | 0 |  |  |  | hypothetical protein                              | NA         | NA                                                                                                  |
| Supercontig_1.3_MVL<br>G_00613_10sp   | -517,54259 | -517,41049 | 0,2642  | 0,12375 | NS | 0 |  |  |  | aminotransferase, classes I and II                | PF00155.14 | Aminotran_1_2(Aminotransferase class I and II)                                                      |
| Supercontig_1.161_MV<br>LG_06873_10sp | -434,81076 | -434,77746 | 0,0666  | 0,03275 | NS | 0 |  |  |  | hypothetical protein                              | PF05686.5  | DUF821(Arabidopsis thaliana protein of unknown function (DUF821))                                   |
| Supercontig_1.20_MV<br>LG_02590_8sp   | -592,25306 | -592,14586 | 0,2144  | 0,10165 | NS | 0 |  |  |  | hypothetical protein                              | NA         | NA                                                                                                  |
| Supercontig_1.38_MV<br>LG_03759_11sp  | -491,39991 | -491,39985 | 0,00012 | 0       | NS | 0 |  |  |  | hypothetical protein                              | PF00481.14 | PP2C(Protein phosphatase 2C)                                                                        |
| Supercontig_1.1_MVL<br>G_00089_10sp   | -412,87219 | -411,30059 | 3,1432  | 0,79229 | NS | 0 |  |  |  | hypothetical protein                              | PF00155.14 | Aminotran_1_2(Aminotransferase class I and II)                                                      |
| Supercontig_1.40_MV<br>LG_03904_10sp  | -428,29315 | -426,39896 | 3,78838 | 0,84956 | NS | 0 |  |  |  | hypothetical protein                              | PF08648.5  | DUF1777(Protein of unknown function (DUF1777))                                                      |
| Supercontig_1.365_MV<br>LG_07249_7sp  | -871,65711 | -870,99836 | 1,3175  | 0,4825  | NS | 0 |  |  |  | hypothetical protein                              | NA         | NA                                                                                                  |
| Supercontig_1.49_MV<br>LG_04444_11sp  | -1171,1144 | -1171,1144 | 0       | 0       | NS | 0 |  |  |  | aspartate aminotransferase                        | PF00155.14 | Aminotran_1_2(Aminotransferase class I and II)                                                      |
| Supercontig_1.51_MV<br>LG_04508_10sp  | -679,26982 | -679,26982 | 0       | 0       | NS | 0 |  |  |  | pyruvate dehydrogenase E1 component subunit alpha | TIGR03182  | TIGR03182(PDH_E1_alpha_y: pyruvate dehydrogenase (acetyl-transferring) E1 component, alpha subunit) |
| Supercontig_1.101_MV<br>LG_06165_11sp | -532,86319 | -532,71167 | 0,30304 | 0,1406  | NS | 0 |  |  |  | hypothetical protein                              | NA         | NA                                                                                                  |
| Supercontig_1.2_MVL<br>G_00331_6sp    | -601,59762 | -601,59725 | 0,00074 | 0,00037 | NS | 0 |  |  |  | hypothetical protein                              | PF00735.11 | Septin(Septin)                                                                                      |
| Supercontig_1.173_MV<br>LG_06957_9sp  | -693,89212 | -693,89212 | 0       | 0       | NS | 0 |  |  |  | hypothetical protein                              | PF03124.7  | EXS(EXS family)                                                                                     |
| Supercontig_1.9_MVL<br>G_01519_12sp   | -800,22529 | -800,11127 | 0,22804 | 0,10776 | NS | 0 |  |  |  | hypothetical protein                              | NA         | NA                                                                                                  |
| Supercontig_1.36_MV<br>LG_03635_9sp   | -854,31951 | -854,31951 | 0       | 0       | NS | 0 |  |  |  | hypothetical protein                              | PF08645.4  | PNK3P(Polynucleotide kinase 3 phosphatase)                                                          |
| Supercontig_1.1_MVL<br>G_00041_9sp    | -707,67784 | -707,67763 | 0,00042 | 0,00021 | NS | 0 |  |  |  | NADP-specific glutamate dehydrogenase             | PF02812.11 | ELFV_dehydrog_N(Glu/Leu/Phe/Val dehydrogenase, dimerisation domain)                                 |
| Supercontig_1.27_MV<br>LG_03099_9sp   | -470,28791 | -470,16178 | 0,25226 | 0,1185  | NS | 0 |  |  |  | hypothetical protein                              | NA         | NA                                                                                                  |
| Supercontig_1.51_MV<br>LG_04504_10sp  | -707,02967 | -707,02916 | 0,00102 | 0,00051 | NS | 0 |  |  |  | exportin-1                                        | PF03810.12 | IBN_N(Importin-beta N-terminal domain)                                                              |
| Supercontig_1.1_MVL<br>G_00060_6sp    | -392,25676 | -392,25671 | 0       | 0       | NS | 0 |  |  |  | hypothetical protein                              | NA         | NA                                                                                                  |
| Supercontig_1.87_MV<br>LG_05843_7sp   | -886,71994 | -886,71994 | 0       | 0       | NS | 0 |  |  |  | hypothetical protein                              | PF00125.17 | Histone(Core histone H2A/H2B/H3/H4)                                                                 |
| Supercontig_1.29_MV<br>LG_03237_7sp   | -1420,206  | -1420,1391 | 0,13374 | 0,06468 | NS | 0 |  |  |  | hypothetical protein                              | NA         | NA                                                                                                  |
| Supercontig_1.15_MV<br>LG_02059_9sp   | -325,00994 | -323,5939  | 2,83208 | 0,75733 | NS | 0 |  |  |  | hypothetical protein                              | NA         | NA                                                                                                  |

|                                      |            |            |         |         |    |   |  |  |  |                                |            |                                                                    |
|--------------------------------------|------------|------------|---------|---------|----|---|--|--|--|--------------------------------|------------|--------------------------------------------------------------------|
| Supercontig_1.19_MV<br>LG_02473_10sp | -459,38517 | -459,37439 | 0,02156 | 0,01072 | NS | 0 |  |  |  | hypothetical protein           | PF08799.4  | PRP4(pre-mRNA processing factor 4 (PRP4) like)                     |
| Supercontig_1.15_MV<br>LG_02146_8sp  | -730,37825 | -730,37825 | 0       | 0       | NS | 0 |  |  |  | hypothetical protein           | PF01062.14 | Bestrophin(Bestrophin)                                             |
| Supercontig_1.15_MV<br>LG_02152_9sp  | -1262,2926 | -1262,2222 | 0,14086 | 0,06801 | NS | 0 |  |  |  | hypothetical protein           | NA         | NA                                                                 |
| Supercontig_1.59_MV<br>LG_04913_7sp  | -768,14691 | -768,14691 | 0       | 0       | NS | 0 |  |  |  | CAMK/CAMKL/PASK protein kinase | PF07714.10 | Pkinase_Tyr(Protein tyrosine kinase)                               |
| Supercontig_1.13_MV<br>LG_01925_9sp  | -529,37714 | -527,59956 | 3,55516 | 0,83095 | NS | 0 |  |  |  | hypothetical protein           | NA         | NA                                                                 |
| Supercontig_1.51_MV<br>LG_04538_7sp  | -689,48443 | -689,48443 | 0       | 0       | NS | 0 |  |  |  | hypothetical protein           | PF08711.4  | Med26(TFIIIS helical bundle-like domain)                           |
| Supercontig_1.8_MVL<br>G_01429_6sp   | -341,64983 | -341,64983 | 0       | 0       | NS | 0 |  |  |  | hypothetical protein           | PF00581.13 | Rhodanese(Rhodanese-like domain)                                   |
| Supercontig_1.46_MV<br>LG_04255_11sp | -1047,5739 | -1047,5497 | 0,04836 | 0,02389 | NS | 0 |  |  |  | hypothetical protein           | PF00149.21 | Metallophos(Calcineurin-like phosphoesterase)                      |
| Supercontig_1.60_MV<br>LG_04935_11sp | -461,09256 | -461,09256 | 0       | 0       | NS | 0 |  |  |  | dihydropolyl dehydrogenase     | PF00070.20 | Pyr_redox(Pyridine nucleotide-disulphide oxidoreductase)           |
| Supercontig_1.4_MVL<br>G_00795_7sp   | -1214,2462 | -1214,2462 | 0       | 0       | NS | 0 |  |  |  | hypothetical protein           | TIGR00756  | TIGR00756(PPR: pentatricopeptide repeat domain)                    |
| Supercontig_1.66_MV<br>LG_05190_6sp  | -665,06175 | -664,90603 | 0,31144 | 0,1442  | NS | 0 |  |  |  | hypothetical protein           | PF08547.5  | CIA30(Complex I intermediate-associated protein 30 (CIA30))        |
| Supercontig_1.29_MV<br>LG_03255_11sp | -603,46452 | -603,43559 | 0,05786 | 0,02852 | NS | 0 |  |  |  | hypothetical protein           | NA         | NA                                                                 |
| Supercontig_1.49_MV<br>LG_04438_10sp | -1212,6236 | -1212,6236 | 0       | 0       | NS | 0 |  |  |  | hypothetical protein           | PF00076.15 | RRM_1(RNA recognition motif. (a.k.a. RRM, RBD, or RNP domain))     |
| Supercontig_1.82_MV<br>LG_05713_9sp  | -589,90709 | -589,88548 | 0,04322 | 0,02138 | NS | 0 |  |  |  | hypothetical protein           | PF05691.5  | Raffinose_syn(Raffinose synthase or seed inhibition protein Ssp1)  |
| Supercontig_1.13_MV<br>LG_01935_12sp | -700,35218 | -699,41468 | 1,875   | 0,60839 | NS | 0 |  |  |  | hypothetical protein           | PF00916.13 | Sulfate_transp(Sulfate transporter family)                         |
| Supercontig_1.66_MV<br>LG_05167_7sp  | -869,66151 | -869,66151 | 0       | 0       | NS | 0 |  |  |  | hypothetical protein           | PF08530.3  | PepX_C(X-Pro dipeptidyl-peptidase C-terminal non-catalytic domain) |
| Supercontig_1.98_MV<br>LG_06082_7sp  | -623,06254 | -623,06254 | 0       | 0       | NS | 0 |  |  |  | hypothetical protein           | PF00400.25 | WD40(WD domain, G-beta repeat)                                     |
| Supercontig_1.19_MV<br>LG_02517_9sp  | -792,41323 | -792,41323 | 0       | 0       | NS | 0 |  |  |  | hypothetical protein           | PF12171.1  | zf-C2H2_jaz(Zinc-finger double-stranded RNA-binding)               |
| Supercontig_1.95_MV<br>LG_06015_9sp  | -597,95557 | -597,13592 | 1,6393  | 0,55941 | NS | 0 |  |  |  | hypothetical protein           | PF00313.15 | CSD('Cold-shock' DNA-binding domain)                               |
| Supercontig_1.13_MV<br>LG_01920_10sp | -647,12298 | -645,85373 | 2,5385  | 0,71896 | NS | 0 |  |  |  | hypothetical protein           | NA         | NA                                                                 |
| Supercontig_1.12_MV<br>LG_01795_8sp  | -2083,6402 | -2083,6402 | 0       | 0       | NS | 0 |  |  |  | hypothetical protein           | PF00172.11 | Zn_clus(Fungal Zn(2)-Cys(6) binuclear cluster domain)              |
| Supercontig_1.2_MVL<br>G_00439_10sp  | -311,75062 | -311,75048 | 0,00028 | 0,00014 | NS | 0 |  |  |  | acetyl-coenzyme A synthetase   | TIGR02188  | TIGR02188(Ac-CoA_lig_AcsA: acetate--CoA ligase)                    |
| Supercontig_1.150_MV<br>LG_06772_7sp | -671,20489 | -671,20489 | 0       | 0       | NS | 0 |  |  |  | hypothetical protein           | NA         | NA                                                                 |

|                                      |            |            |         |         |    |   |   |   |   |   |   |   |   |   |                                        |            |                                                                  |
|--------------------------------------|------------|------------|---------|---------|----|---|---|---|---|---|---|---|---|---|----------------------------------------|------------|------------------------------------------------------------------|
| Supercontig_1.34_MV<br>LG_03563_9sp  | -644,36681 | -644,3663  | 0,00102 | 0,00051 | NS | 0 | 0 | 0 | 0 | 0 | 0 | 0 | 0 | 0 | hypothetical protein                   | NA         | NA                                                               |
| Supercontig_1.1_MVL<br>G_00037_10sp  | -693,3151  | -693,3151  | 0       | 0       | NS | 0 | 0 | 0 | 0 | 0 | 0 | 0 | 0 | 0 | hypothetical protein                   | NA         | NA                                                               |
| Supercontig_1.30_MV<br>LG_03268_9sp  | -724,89481 | -723,98416 | 1,8213  | 0,59774 | NS | 0 | 0 | 0 | 0 | 0 | 0 | 0 | 0 | 0 | hypothetical protein                   | PF01494.12 | FAD_binding_3(FAD binding domain)                                |
| Supercontig_1.14_MV<br>LG_01985_7sp  | -1102,0603 | -1102,0603 | 0       | 0       | NS | 0 | 0 | 0 | 0 | 0 | 0 | 0 | 0 | 0 | hypothetical protein                   | NA         | NA                                                               |
| Supercontig_1.20_MV<br>LG_02589_12sp | -454,11524 | -454,11524 | 0       | 0       | NS | 0 | 0 | 0 | 0 | 0 | 0 | 0 | 0 | 0 | hypothetical protein                   | PF04495.7  | GRASP55_65(GRASP55/65 family)                                    |
| Supercontig_1.25_MV<br>LG_02914_10sp | -731,67607 | -730,95029 | 1,45156 | 0,51605 | NS | 0 | 0 | 0 | 0 | 0 | 0 | 0 | 0 | 0 | hypothetical protein                   | PF00172.11 | Zn_clus(Fungal Zn(2)-Cys(6) binuclear cluster domain)            |
| Supercontig_1.7_MVL<br>G_01224_9sp   | -308,25836 | -308,15001 | 0,2167  | 0,10269 | NS | 0 | 0 | 0 | 0 | 0 | 0 | 0 | 0 | 0 | hypothetical protein                   | PF01779.10 | Ribosomal_L29e(Ribosomal L29e protein family)                    |
| Supercontig_1.18_MV<br>LG_02383_8sp  | -475,2865  | -475,28621 | 0,00058 | 0,00029 | NS | 0 | 0 | 0 | 0 | 0 | 0 | 0 | 0 | 0 | hypothetical protein                   | PF07956.4  | DUF1690(Protein of Unknown function (DUF1690))                   |
| Supercontig_1.132_MV<br>LG_06598_8sp | -336,54179 | -336,54173 | 0       | 0       | NS | 0 | 0 | 0 | 0 | 0 | 0 | 0 | 0 | 0 | hypothetical protein                   | PF01715.10 | IPPT(IPP transferase)                                            |
| Supercontig_1.62_MV<br>LG_05025_11sp | -536,51794 | -536,51792 | 0       | 0       | NS | 0 | 0 | 0 | 0 | 0 | 0 | 0 | 0 | 0 | hypothetical protein                   | NA         | NA                                                               |
| Supercontig_1.3_MVL<br>G_00682_9sp   | -1062,0433 | -1061,9087 | 0,26934 | 0,126   | NS | 0 | 0 | 0 | 0 | 0 | 0 | 0 | 0 | 0 | hypothetical protein                   | NA         | NA                                                               |
| Supercontig_1.42_MV<br>LG_04054_11sp | -735,89154 | -735,89154 | 0       | 0       | NS | 0 | 0 | 0 | 0 | 0 | 0 | 0 | 0 | 0 | hypothetical protein                   | PF08243.4  | SPT2(SPT2 chromatin protein)                                     |
| Supercontig_1.69_MV<br>LG_05310_8sp  | -266,92473 | -266,92458 | 0,0003  | 0,00015 | NS | 0 | 0 | 0 | 0 | 0 | 0 | 0 | 0 | 0 | fructose-1,6-bisphosphatase, cytosolic | PF00316.13 | FBPase(Fructose-1-6-bisphosphatase)                              |
| Supercontig_1.16_MV<br>LG_02232_7sp  | -468,13766 | -468,05451 | 0,1663  | 0,07979 | NS | 0 | 0 | 0 | 0 | 0 | 0 | 0 | 0 | 0 | hypothetical protein                   | NA         | NA                                                               |
| Supercontig_1.22_MV<br>LG_02729_9sp  | -951,06382 | -950,99702 | 0,1336  | 0,06462 | NS | 0 | 0 | 0 | 0 | 0 | 0 | 0 | 0 | 0 | hypothetical protein                   | TIGR00727  | TIGR00727(ISP4_OPT: small oligopeptide transporter, OPT family)  |
| Supercontig_1.174_MV<br>LG_06965_8sp | -540,69641 | -540,69641 | 0       | 0       | NS | 0 | 0 | 0 | 0 | 0 | 0 | 0 | 0 | 0 | hypothetical protein                   | NA         | NA                                                               |
| Supercontig_1.3_MVL<br>G_00551_8sp   | -698,87952 | -698,87927 | 0,0005  | 0,00025 | NS | 0 | 0 | 0 | 0 | 0 | 0 | 0 | 0 | 0 | hypothetical protein                   | PF08520.3  | DUF1748(Fungal protein of unknown function (DUF1748))            |
| Supercontig_1.62_MV<br>LG_05011_7sp  | -644,16758 | -643,75037 | 0,83442 | 0,34112 | NS | 0 | 0 | 0 | 0 | 0 | 0 | 0 | 0 | 0 | hypothetical protein                   | NA         | NA                                                               |
| Supercontig_1.8_MVL<br>G_01436_10sp  | -544,10426 | -544,10426 | 0       | 0       | NS | 0 | 0 | 0 | 0 | 0 | 0 | 0 | 0 | 0 | hypothetical protein                   | PF07690.9  | MFS_1(Major Facilitator Superfamily)                             |
| Supercontig_1.27_MV<br>LG_03104_8sp  | -846,68453 | -845,37491 | 2,61924 | 0,73008 | NS | 0 | 0 | 0 | 0 | 0 | 0 | 0 | 0 | 0 | hypothetical protein                   | PF07748.6  | Glyco_hydro_38C(Glycosyl hydrolases family 38 C-terminal domain) |
| Supercontig_1.42_MV<br>LG_04065_8sp  | -719,23013 | -718,3564  | 1,74746 | 0,58261 | NS | 0 | 0 | 0 | 0 | 0 | 0 | 0 | 0 | 0 | hypothetical protein                   | PF00270.22 | DEAD(DEAD/DEAH box helicase)                                     |
| Supercontig_1.99_MV<br>LG_06115_8sp  | -483,2394  | -482,5023  | 1,4742  | 0,5215  | NS | 0 | 0 | 0 | 0 | 0 | 0 | 0 | 0 | 0 | hypothetical protein                   | PF07808.6  | RED_N(RED-like protein N-terminal region)                        |
| Supercontig_1.6_MVL<br>G_01100_10sp  | -943,3592  | -943,33167 | 0,05506 | 0,02715 | NS | 0 | 0 | 0 | 0 | 0 | 0 | 0 | 0 | 0 | hypothetical protein                   | NA         | NA                                                               |

|                                      |            |            |         |         |    |   |   |   |   |   |                                             |            |                                                       |
|--------------------------------------|------------|------------|---------|---------|----|---|---|---|---|---|---------------------------------------------|------------|-------------------------------------------------------|
| Supercontig_1.2_MVL<br>G_00277_7sp   | -419,22972 | -419,22962 | 0,0002  | 0       | NS | 0 | □ | □ | □ | □ | U6 snRNA-associated<br>Sm-like protein LSM2 | PF01423.15 | LSM(LSM domain)                                       |
| Supercontig_1.175_MV<br>LG_06968_9sp | -293,87462 | -293,87451 | 0,00022 | 0,00011 | NS | 0 | □ | □ | □ | □ | 40S ribosomal protein<br>S26E               | PF01283.12 | Ribosomal_S26e(Ribosomal<br>protein S26e)             |
| Supercontig_1.191_MV<br>LG_07045_8sp | -930,18432 | -930,18432 | 0       | 0       | NS | 0 | □ | □ | □ | □ | hypothetical protein                        | PF06813.6  | Nodulin-like(Nodulin-like)                            |
| Supercontig_1.40_MV<br>LG_03922_9sp  | -668,19191 | -668,19191 | 0       | 0       | NS | 0 | □ | □ | □ | □ | adenine<br>phosphoribosyltransfer<br>ase    | TIGR01090  | TIGR01090(apt: adenine<br>phosphoribosyltransferase)  |
| Supercontig_1.12_MV<br>LG_01820_10sp | -507,27836 | -505,01524 | 4,52624 | 0,89597 | NS | 0 | □ | □ | □ | □ | hypothetical protein                        | PF00743.12 | FMO-like(Flavin-binding<br>monooxygenase-like)        |
| Supercontig_1.91_MV<br>LG_05930_10sp | -479,8514  | -478,93266 | 1,83748 | 0,60098 | NS | 0 | □ | □ | □ | □ | hypothetical protein                        | PF07156.7  | Prenylcys_lyase(Prenylcysteine<br>lyase)              |
| Supercontig_1.66_MV<br>LG_05196_10sp | -473,03298 | -473,03298 | 0       | 0       | NS | 0 | □ | □ | □ | □ | hypothetical protein                        | PF00083.17 | Sugar_tr(Sugar (and other)<br>transporter)            |
| Supercontig_1.47_MV<br>LG_04315_10sp | -406,69735 | -406,69735 | 0       | 0       | NS | 0 | □ | □ | □ | □ | hypothetical protein                        | PF02515.10 | CoA_transf_3(CoA-transferase<br>family III)           |
| Supercontig_1.1_MVL<br>G_00138_9sp   | -660,55569 | -660,55569 | 0       | 0       | NS | 0 | □ | □ | □ | □ | hypothetical protein                        | PF12519.1  | DUF3722(Protein of unknown<br>function (DUF3722))     |
| Supercontig_1.46_MV<br>LG_04266_10sp | -1119,2098 | -1119,2093 | 0,0009  | 0,00045 | NS | 0 | □ | □ | □ | □ | hypothetical protein                        | PF01851.15 | PC_rep(Proteasome/cyclosome<br>repeat)                |
| Supercontig_1.1_MVL<br>G_00009_7sp   | -1058,048  | -1058,048  | 0       | 0       | NS | 0 | □ | □ | □ | □ | hypothetical protein                        | PF08238.5  | Sel1(Sel1 repeat)                                     |
| Supercontig_1.41_MV<br>LG_04033_7sp  | -750,26961 | -750,00913 | 0,52096 | 0,22932 | NS | 0 | □ | □ | □ | □ | hypothetical protein                        | PF01652.11 | IF4E(Eukaryotic initiation factor<br>4E)              |
| Supercontig_1.34_MV<br>LG_03554_9sp  | -429,54735 | -429,54735 | 0       | 0       | NS | 0 | □ | □ | □ | □ | hypothetical protein                        | TIGR00601  | TIGR00601(rad23: UV excision<br>repair protein Rad23) |
| Supercontig_1.116_MV<br>LG_06375_8sp | -500,4222  | -500,38434 | 0,07572 | 0,03715 | NS | 0 | □ | □ | □ | □ | hypothetical protein                        | PF11976.1  | Rad60-SLD(Ubiquitin-2 like<br>Rad60 SUMO-like)        |
| Supercontig_1.49_MV<br>LG_04402_12sp | -1175,6624 | -1175,6624 | 0       | 0       | NS | 0 | □ | □ | □ | □ | hypothetical protein                        | PF11196.1  | DUF2834(Protein of unknown<br>function (DUF2834))     |
| Supercontig_1.12_MV<br>LG_01815_12sp | -501,52291 | -501,52148 | 0,00286 | 0,00143 | NS | 0 | □ | □ | □ | □ | hypothetical protein                        | PF00027.22 | cNMP_binding(Cyclic nucleotide-<br>binding domain)    |
| Supercontig_1.81_MV<br>LG_05679_11sp | -800,6948  | -800,6948  | 0       | 0       | NS | 0 | □ | □ | □ | □ | hypothetical protein                        | NA         | NA                                                    |
| Supercontig_1.155_MV<br>LG_06827_9sp | -923,73901 | -923,73901 | 0       | 0       | NS | 0 | □ | □ | □ | □ | hypothetical protein                        | PF02434.9  | Fringe(Fringe-like)                                   |
| Supercontig_1.26_MV<br>LG_03048_9sp  | -480,66198 | -480,15519 | 1,01358 | 0,39757 | NS | 0 | □ | □ | □ | □ | hypothetical protein                        | NA         | NA                                                    |
| Supercontig_1.15_MV<br>LG_02148_12sp | -362,5569  | -362,08349 | 0,94682 | 0,37713 | NS | 0 | □ | □ | □ | □ | hypothetical protein                        | PF09363.3  | XFP_C(XFP C-terminal domain)                          |
| Supercontig_1.140_MV<br>LG_06683_8sp | -538,92984 | -538,92984 | 0       | 0       | NS | 0 | □ | □ | □ | □ | hypothetical protein                        | NA         | NA                                                    |
| Supercontig_1.52_MV<br>LG_04553_8sp  | -1501,4577 | -1500,7479 | 1,41958 | 0,50825 | NS | 0 | □ | □ | □ | □ | hypothetical protein                        | NA         | NA                                                    |
| Supercontig_1.58_MV<br>LG_04845_10sp | -556,0417  | -555,92809 | 0,22722 | 0,10739 | NS | 0 | □ | □ | □ | □ | hypothetical protein                        | PF05347.8  | Complex1_LYR(Complex 1<br>protein (LYR family))       |
| Supercontig_1.29_MV<br>LG_03229_7sp  | -422,26245 | -422,26245 | 0       | 0       | NS | 0 | □ | □ | □ | □ | hypothetical protein                        | NA         | NA                                                    |
| Supercontig_1.5_MVL<br>G_01037_8sp   | -556,42535 | -556,42525 | 0,0002  | 0       | NS | 0 | □ | □ | □ | □ | hypothetical protein                        | PF07716.8  | bZIP_2(Basic region leucine<br>zipper)                |

|                                       |            |            |         |         |    |   |   |   |   |   |   |                                     |            |                                                                                      |
|---------------------------------------|------------|------------|---------|---------|----|---|---|---|---|---|---|-------------------------------------|------------|--------------------------------------------------------------------------------------|
| Supercontig_1.13_MV<br>LG_01936_12sp  | -652,88135 | -652,88092 | 0,00086 | 0,00043 | NS | 0 | □ | □ | □ | □ | □ | hypothetical protein                | NA         | NA                                                                                   |
| Supercontig_1.40_MV<br>LG_03954_8sp   | -480,26962 | -480,26962 | 0       | 0       | NS | 0 | □ | □ | □ | □ | □ | 3-isopropylmalate<br>dehydratase    | PF00694.12 | Aconitase_C(Aconitase C-<br>terminal domain)                                         |
| Supercontig_1.192_MV<br>LG_07049_11sp | -1004,2038 | -1004,1986 | 0,01046 | 0,00522 | NS | 0 | □ | □ | □ | □ | □ | hypothetical protein                | NA         | NA                                                                                   |
| Supercontig_1.226_MV<br>LG_07176_6sp  | -865,72534 | -864,39774 | 2,6552  | 0,73489 | NS | 0 | □ | □ | □ | □ | □ | hypothetical protein                | NA         | NA                                                                                   |
| Supercontig_1.15_MV<br>LG_02094_10sp  | -385,07268 | -384,65709 | 0,83118 | 0,34005 | NS | 0 | □ | □ | □ | □ | □ | queuine tRNA-<br>ribosyltransferase | TIGR00449  | TIGR00449(tgt_general: tRNA-<br>guanine transglycosylases,<br>various specificities) |
| Supercontig_1.121_MV<br>LG_06448_11sp | -433,4279  | -433,42784 | 0,00012 | 0       | NS | 0 | □ | □ | □ | □ | □ | hypothetical protein                | PF00566.11 | TBC(TBC domain)                                                                      |
| Supercontig_1.140_MV<br>LG_06675_12sp | -507,52883 | -507,52874 | 0,00018 | 0       | NS | 0 | □ | □ | □ | □ | □ | hypothetical protein                | NA         | NA                                                                                   |
| Supercontig_1.78_MV<br>LG_05582_8sp   | -1097,6275 | -1097,5247 | 0,20556 | 0,09767 | NS | 0 | □ | □ | □ | □ | □ | hypothetical protein                | PF03055.8  | RPE65(Retinal pigment epithelial<br>membrane protein)                                |
| Supercontig_1.149_MV<br>LG_06759_8sp  | -1146,8371 | -1146,6814 | 0,31134 | 0,14416 | NS | 0 | □ | □ | □ | □ | □ | homoserine O-<br>acetyltransferase  | TIGR01392  | TIGR01392(homoserO_Ac_tmn:<br>homoserine O-acetyltransferase)                        |
| Supercontig_1.67_MV<br>LG_05219_6sp   | -407,56089 | -407,56089 | 0       | 0       | NS | 0 | □ | □ | □ | □ | □ | hypothetical protein                | NA         | NA                                                                                   |
| Supercontig_1.203_MV<br>LG_07096_6sp  | -1326,5224 | -1325,7706 | 1,50358 | 0,52848 | NS | 0 | □ | □ | □ | □ | □ | hypothetical protein                | NA         | NA                                                                                   |
| Supercontig_1.74_MV<br>LG_05442_10sp  | -386,93868 | -386,93868 | 0       | 0       | NS | 0 | □ | □ | □ | □ | □ | hypothetical protein                | NA         | NA                                                                                   |
| Supercontig_1.47_MV<br>LG_04305_9sp   | -983,92442 | -983,92438 | 0       | 0       | NS | 0 | □ | □ | □ | □ | □ | hypothetical protein                | PF00664.16 | ABC_membrane(ABC<br>transporter transmembrane<br>region)                             |
| Supercontig_1.10_MV<br>LG_01650_10sp  | -497,29053 | -497,29053 | 0       | 0       | NS | 0 | □ | □ | □ | □ | □ | hypothetical protein                | PF00083.17 | Sugar_tr(Sugar (and other)<br>transporter)                                           |
| Supercontig_1.23_MV<br>LG_02794_8sp   | -657,21705 | -657,21705 | 0       | 0       | NS | 0 | □ | □ | □ | □ | □ | hypothetical protein                | PF00620.20 | RhoGAP(RhoGAP domain)                                                                |
| Supercontig_1.33_MV<br>LG_03485_10sp  | -791,23589 | -791,23589 | 0       | 0       | NS | 0 | □ | □ | □ | □ | □ | hypothetical protein                | PF00534.13 | Glycos_transf_1(Glycosyl<br>transferases group 1)                                    |
| Supercontig_1.60_MV<br>LG_04950_10sp  | -710,10693 | -710,10693 | 0       | 0       | NS | 0 | □ | □ | □ | □ | □ | hypothetical protein                | NA         | NA                                                                                   |
| Supercontig_1.57_MV<br>LG_04837_8sp   | -406,60437 | -406,60419 | 0       | 0       | NS | 0 | □ | □ | □ | □ | □ | hypothetical protein                | PF00153.20 | Mito_carr(Mitochondrial carrier<br>protein)                                          |
| Supercontig_1.15_MV<br>LG_02147_9sp   | -484,44377 | -484,44375 | 0       | 0       | NS | 0 | □ | □ | □ | □ | □ | hypothetical protein                | PF03029.10 | ATP_bind_1(Conserved<br>hypothetical ATP binding protein)                            |
| Supercontig_1.28_MV<br>LG_03162_10sp  | -530,79477 | -530,79477 | 0       | 0       | NS | 0 | □ | □ | □ | □ | □ | hypothetical protein                | TIGR00727  | TIGR00727(ISP4_OPT: small<br>oligopeptide transporter, OPT<br>family)                |
| Supercontig_1.6_MVL<br>G_01176_10sp   | -794,64948 | -794,64948 | 0       | 0       | NS | 0 | □ | □ | □ | □ | □ | hypothetical protein                | PF02585.10 | PIG-L(GlcNAc-PI de-N-<br>acetylase)                                                  |
| Supercontig_1.1_MVL<br>G_00255_9sp    | -446,74294 | -446,74294 | 0       | 0       | NS | 0 | □ | □ | □ | □ | □ | hypothetical protein                | PF05160.6  | DSS1_SEM1(DSS1/SEM1<br>family)                                                       |
| Supercontig_1.2_MVL<br>G_00449_8sp    | -961,98091 | -961,98091 | 0       | 0       | NS | 0 | □ | □ | □ | □ | □ | hypothetical protein                | PF03142.8  | Chitin_synth_2(Chitin synthase)                                                      |

|                                       |            |            |         |         |    |   |  |  |  |  |  |                            |            |                                                    |
|---------------------------------------|------------|------------|---------|---------|----|---|--|--|--|--|--|----------------------------|------------|----------------------------------------------------|
| Supercontig_1.8_MVL<br>G_01373_7sp    | -1094,4886 | -1094,4886 | 0       | 0       | NS | 0 |  |  |  |  |  | hypothetical protein       | PF03839.9  | Sec62(Translocation protein Sec62)                 |
| Supercontig_1.5_MVL<br>G_01011_10sp   | -800,68198 | -800,68198 | 0       | 0       | NS | 0 |  |  |  |  |  | hypothetical protein       | NA         | NA                                                 |
| Supercontig_1.34_MV<br>LG_03513_6sp   | -811,93491 | -809,77426 | 4,3213  | 0,88475 | NS | 0 |  |  |  |  |  | hypothetical protein       | NA         | NA                                                 |
| Supercontig_1.142_MV<br>LG_06704_8sp  | -567,59106 | -567,59106 | 0       | 0       | NS | 0 |  |  |  |  |  | hypothetical protein       | PF01687.10 | Flavokinase(Riboflavin kinase)                     |
| Supercontig_1.135_MV<br>LG_06629_11sp | -450,78772 | -449,63299 | 2,30946 | 0,68486 | NS | 0 |  |  |  |  |  | hypothetical protein       | PF00515.21 | TPR_1(Tetratricopeptide repeat)                    |
| Supercontig_1.12_MV<br>LG_01799_8sp   | -289,46984 | -289,46482 | 0,01004 | 0,00501 | NS | 0 |  |  |  |  |  | hypothetical protein       | PF04893.10 | Yip1(Yip1 domain)                                  |
| Supercontig_1.1_MVL<br>G_00235_9sp    | -662,0698  | -661,26197 | 1,61566 | 0,55418 | NS | 0 |  |  |  |  |  | hypothetical protein       | PF04116.6  | FA_hydroxylase(Fatty acid hydroxylase superfamily) |
| Supercontig_1.197_MV<br>LG_07068_9sp  | -804,2021  | -804,2021  | 0       | 0       | NS | 0 |  |  |  |  |  | hypothetical protein       | NA         | NA                                                 |
| Supercontig_1.1_MVL<br>G_00175_9sp    | -525,51196 | -525,51196 | 0       | 0       | NS | 0 |  |  |  |  |  | hypothetical protein       | NA         | NA                                                 |
| Supercontig_1.53_MV<br>LG_04635_8sp   | -414,58208 | -414,46335 | 0,23746 | 0,11195 | NS | 0 |  |  |  |  |  | hypothetical protein       | PF01070.11 | FMN_dh(FMN-dependent dehydrogenase)                |
| Supercontig_1.4_MVL<br>G_00695_8sp    | -344,44052 | -344,42135 | 0,03834 | 0,01899 | NS | 0 |  |  |  |  |  | hypothetical protein       | PF01284.16 | MARVEL(Membrane-associating domain)                |
| Supercontig_1.36_MV<br>LG_03659_11sp  | -680,2415  | -679,80556 | 0,87188 | 0,35334 | NS | 0 |  |  |  |  |  | hypothetical protein       | PF06220.5  | zf-U1(U1 zinc finger)                              |
| Supercontig_1.18_MV<br>LG_02387_10sp  | -736,27518 | -736,27518 | 0       | 0       | NS | 0 |  |  |  |  |  | coatamer subunit beta      | PF01602.13 | Adaptin_N(Adaptin N terminal region)               |
| Supercontig_1.161_MV<br>LG_06864_9sp  | -451,26828 | -451,26828 | 0       | 0       | NS | 0 |  |  |  |  |  | hypothetical protein       | PF00732.12 | GMC_oxred_N(GMC oxidoreductase)                    |
| Supercontig_1.32_MV<br>LG_03426_10sp  | -903,39638 | -903,31073 | 0,1713  | 0,08208 | NS | 0 |  |  |  |  |  | hypothetical protein       | PF02375.10 | JmjN(jmjN domain)                                  |
| Supercontig_1.49_MV<br>LG_04427_11sp  | -612,08718 | -612,08718 | 0       | 0       | NS | 0 |  |  |  |  |  | hypothetical protein       | NA         | NA                                                 |
| Supercontig_1.58_MV<br>LG_04880_9sp   | -526,19262 | -526,19245 | 0,00034 | 0,00017 | NS | 0 |  |  |  |  |  | 60S ribosomal protein L3-A | PF00297.15 | Ribosomal_L3(Ribosomal protein L3)                 |
| Supercontig_1.30_MV<br>LG_03296_8sp   | -687,17296 | -687,17296 | 0       | 0       | NS | 0 |  |  |  |  |  | hypothetical protein       | NA         | NA                                                 |
| Supercontig_1.3_MVL<br>G_00595_11sp   | -502,39356 | -502,32079 | 0,14554 | 0,07019 | NS | 0 |  |  |  |  |  | hypothetical protein       | NA         | NA                                                 |
| Supercontig_1.4_MVL<br>G_00831_10sp   | -554,21812 | -554,21812 | 0       | 0       | NS | 0 |  |  |  |  |  | hypothetical protein       | PF02104.8  | SURF1(SURF1 family)                                |
| Supercontig_1.39_MV<br>LG_03869_8sp   | -945,9825  | -945,78614 | 0,39272 | 0,17828 | NS | 0 |  |  |  |  |  | hypothetical protein       | PF00018.21 | SH3_1(SH3 domain)                                  |
| Supercontig_1.27_MV<br>LG_03074_9sp   | -535,21177 | -535,21177 | 0       | 0       | NS | 0 |  |  |  |  |  | hypothetical protein       | PF03357.14 | Snf7(Snf7)                                         |
| Supercontig_1.15_MV<br>LG_02127_9sp   | -1009,713  | -1009,2338 | 0,95852 | 0,38076 | NS | 0 |  |  |  |  |  | hypothetical protein       | PF03151.9  | TPT(Triose-phosphate Transporter family)           |
| Supercontig_1.5_MVL<br>G_01038_11sp   | -316,1271  | -316,12706 | 0       | 0       | NS | 0 |  |  |  |  |  | hypothetical protein       | PF00400.25 | WD40(WD domain, G-beta repeat)                     |
| Supercontig_1.19_MV<br>LG_02451_9sp   | -303,29591 | -303,29562 | 0,00058 | 0,00029 | NS | 0 |  |  |  |  |  | flap endonuclease 1-A      | PF00867.11 | XPG_I(XPG I-region)                                |
| Supercontig_1.139_MV<br>LG_06663_6sp  | -308,09608 | -308,0954  | 0,00136 | 0,00068 | NS | 0 |  |  |  |  |  | hypothetical protein       | PF03226.7  | Yippee(Yippee putative zinc-binding protein)       |

|                                      |            |            |         |         |    |   |   |   |   |                                                          |            |                                                                       |
|--------------------------------------|------------|------------|---------|---------|----|---|---|---|---|----------------------------------------------------------|------------|-----------------------------------------------------------------------|
| Supercontig_1.16_MV<br>LG_02209_11sp | -441,84845 | -441,8482  | 0,0005  | 0,00025 | NS | 0 | □ | □ | □ | ER membrane protein<br>SH3                               | PF08229.4  | SHR3_chaperone(ER membrane<br>protein SH3)                            |
| Supercontig_1.7_MVL<br>G_01321_8sp   | -311,37107 | -311,17203 | 0,39808 | 0,18048 | NS | 0 | □ | □ | □ | cofilin                                                  | PF00241.13 | Cofilin_ADF(Cofilin/tropomyosin-<br>type actin-binding protein)       |
| Supercontig_1.26_MV<br>LG_03013_11sp | -717,42493 | -717,42493 | 0       | 0       | NS | 0 | □ | □ | □ | hypothetical protein                                     | NA         | NA                                                                    |
| Supercontig_1.98_MV<br>LG_06095_8sp  | -567,5749  | -567,46933 | 0,21114 | 0,10019 | NS | 0 | □ | □ | □ | hypothetical protein                                     | NA         | NA                                                                    |
| Supercontig_1.11_MV<br>LG_01715_10sp | -403,2899  | -403,08583 | 0,40814 | 0,18459 | NS | 0 | □ | □ | □ | V-type proton ATPase<br>catalytic subunit A<br>isoform 2 | PF00306.20 | ATP-synt_ab_C(ATP synthase<br>alpha/beta chain, C terminal<br>domain) |
| Supercontig_1.24_MV<br>LG_02874_9sp  | -542,28267 | -542,24034 | 0,08466 | 0,04145 | NS | 0 | □ | □ | □ | hypothetical protein                                     | PF00512.18 | HisKA(His Kinase A<br>(phosphoacceptor) domain)                       |
| Supercontig_1.21_MV<br>LG_02631_12sp | -493,4742  | -493,47402 | 0,00036 | 0,00018 | NS | 0 | □ | □ | □ | hypothetical protein                                     | PF01426.11 | BAH(BAH domain)                                                       |
| Supercontig_1.15_MV<br>LG_02120_8sp  | -500,09774 | -500,0974  | 0,00068 | 0,00034 | NS | 0 | □ | □ | □ | hypothetical protein                                     | NA         | NA                                                                    |
| Supercontig_1.3_MVL<br>G_00661_9sp   | -378,30327 | -378,30287 | 0,0008  | 0,0004  | NS | 0 | □ | □ | □ | 26S protease<br>regulatory subunit 6B                    | PF07724.7  | AAA_2(AAA domain (Cdc48<br>subfamily))                                |
| Supercontig_1.6_MVL<br>G_01216_10sp  | -804,27764 | -804,27729 | 0,0007  | 0,00035 | NS | 0 | □ | □ | □ | hypothetical protein                                     | PF00176.16 | SNF2_N(SNF2 family N-terminal<br>domain)                              |
| Supercontig_1.125_MV<br>LG_06510_8sp | -257,64218 | -257,64291 | 0       | 0       | NS | 0 | □ | □ | □ | 60S acidic ribosomal<br>protein P2                       | PF00428.12 | Ribosomal_60s(60s Acidic<br>ribosomal protein)                        |
| Supercontig_1.85_MV<br>LG_05791_7sp  | -470,59951 | -470,59951 | 0       | 0       | NS | 0 | □ | □ | □ | hypothetical protein                                     | PF00534.13 | Glycos_transf_1(Glycosyl<br>transferases group 1)                     |
| Supercontig_1.38_MV<br>LG_03788_11sp | -513,04093 | -513,04084 | 0,00018 | 0       | NS | 0 | □ | □ | □ | hypothetical protein                                     | TIGR01159  | TIGR01159(DRP1: density-<br>regulated protein DRP1)                   |
| Supercontig_1.110_MV<br>LG_06298_6sp | -549,40638 | -549,40398 | 0,0048  | 0,0024  | NS | 0 | □ | □ | □ | hypothetical protein                                     | PF05622.5  | HOOK(HOOK protein)                                                    |
| Supercontig_1.21_MV<br>LG_02655_10sp | -985,48329 | -984,4182  | 2,13018 | 0,6553  | NS | 0 | □ | □ | □ | hypothetical protein                                     | PF02815.12 | MIR(MIR domain)                                                       |
| Supercontig_1.67_MV<br>LG_05232_10sp | -533,41796 | -533,41796 | 0       | 0       | NS | 0 | □ | □ | □ | hypothetical protein                                     | PF00664.16 | ABC_membrane(ABC<br>transporter transmembrane<br>region)              |
| Supercontig_1.34_MV<br>LG_03574_10sp | -951,60241 | -951,60241 | 0       | 0       | NS | 0 | □ | □ | □ | hypothetical protein                                     | TIGR00861  | TIGR00861(MIP: MIP family<br>channel proteins)                        |
| Supercontig_1.7_MVL<br>G_01305_10sp  | -348,58867 | -348,17146 | 0,83442 | 0,34112 | NS | 0 | □ | □ | □ | hypothetical protein                                     | PF10502.2  | Peptidase_S26(Peptidase S26)                                          |
| Supercontig_1.101_MV<br>LG_06161_7sp | -639,56348 | -639,56348 | 0       | 0       | NS | 0 | □ | □ | □ | hypothetical protein                                     | TIGR00106  | TIGR00106(TIGR00106:<br>uncharacterized protein,<br>MTH1187 family)   |
| Supercontig_1.150_MV<br>LG_06774_7sp | -394,18995 | -394,18979 | 0,00032 | 0,00016 | NS | 0 | □ | □ | □ | hypothetical protein                                     | PF05669.5  | Med31(SOH1)                                                           |
| Supercontig_1.17_MV<br>LG_02274_10sp | -287,64396 | -287,64395 | 0       | 0       | NS | 0 | □ | □ | □ | hypothetical protein                                     | NA         | NA                                                                    |
| Supercontig_1.2_MVL<br>G_00455_11sp  | -574,13799 | -573,23294 | 1,8101  | 0,59548 | NS | 0 | □ | □ | □ | hypothetical protein                                     | NA         | NA                                                                    |
| Supercontig_1.41_MV<br>LG_03999_10sp | -818,79843 | -818,79838 | 0,0001  | 0       | NS | 0 | □ | □ | □ | hypothetical protein                                     | PF05794.6  | Tcp11(T-complex protein 11)                                           |
| Supercontig_1.77_MV<br>LG_05570_10sp | -547,02998 | -547,02998 | 0       | 0       | NS | 0 | □ | □ | □ | hypothetical protein                                     | NA         | NA                                                                    |

|                                       |            |            |         |         |    |   |   |   |   |   |   |   |   |   |   |                           |            |                                                           |
|---------------------------------------|------------|------------|---------|---------|----|---|---|---|---|---|---|---|---|---|---|---------------------------|------------|-----------------------------------------------------------|
| Supercontig_1.51_MV<br>LG_04539_9sp   | -735,31042 | -735,10628 | 0,40828 | 0,18465 | NS | 0 | 0 | 0 | 0 | 0 | 0 | 0 | 0 | 0 | 0 | hypothetical protein      | PF00326.14 | Peptidase_S9(Prolyl oligopeptidase family)                |
| Supercontig_1.40_MV<br>LG_03913_7sp   | -375,05977 | -375,05977 | 0       | 0       | NS | 0 | 0 | 0 | 0 | 0 | 0 | 0 | 0 | 0 | 0 | hypothetical protein      | PF00226.24 | DnaJ(DnaJ domain)                                         |
| Supercontig_1.165_MV<br>LG_06908_8sp  | -629,27499 | -629,27499 | 0       | 0       | NS | 0 | 0 | 0 | 0 | 0 | 0 | 0 | 0 | 0 | 0 | CMGC/CDK protein kinase   | PF07714.10 | Pkinase_Tyr(Protein tyrosine kinase)                      |
| Supercontig_1.33_MV<br>LG_03465_10sp  | -854,54249 | -854,54249 | 0       | 0       | NS | 0 | 0 | 0 | 0 | 0 | 0 | 0 | 0 | 0 | 0 | hypothetical protein      | NA         | NA                                                        |
| Supercontig_1.86_MV<br>LG_05823_11sp  | -982,09067 | -982,0901  | 0,00114 | 0,00057 | NS | 0 | 0 | 0 | 0 | 0 | 0 | 0 | 0 | 0 | 0 | autophagy-like protein 18 | PF00400.25 | WD40(WD domain, G-beta repeat)                            |
| Supercontig_1.25_MV<br>LG_02933_7sp   | -688,937   | -688,937   | 0       | 0       | NS | 0 | 0 | 0 | 0 | 0 | 0 | 0 | 0 | 0 | 0 | hypothetical protein      | PF05254.5  | UPF0203(Uncharacterised protein family (UPF0203))         |
| Supercontig_1.55_MV<br>LG_04711_11sp  | -578,38674 | -578,38611 | 0,00126 | 0,00063 | NS | 0 | 0 | 0 | 0 | 0 | 0 | 0 | 0 | 0 | 0 | hypothetical protein      | PF00672.18 | HAMP(HAMP domain)                                         |
| Supercontig_1.161_MV<br>LG_06866_12sp | -771,2118  | -769,21341 | 3,99678 | 0,86445 | NS | 0 | 0 | 0 | 0 | 0 | 0 | 0 | 0 | 0 | 0 | hypothetical protein      | NA         | NA                                                        |
| Supercontig_1.86_MV<br>LG_05841_10sp  | -1292,3237 | -1292,3237 | 0       | 0       | NS | 0 | 0 | 0 | 0 | 0 | 0 | 0 | 0 | 0 | 0 | hypothetical protein      | PF00454.20 | PI3_PI4_kinase(Phosphatidylinositol 3- and 4-kinase)      |
| Supercontig_1.93_MV<br>LG_05983_8sp   | -858,32078 | -858,32078 | 0       | 0       | NS | 0 | 0 | 0 | 0 | 0 | 0 | 0 | 0 | 0 | 0 | hypothetical protein      | TIGR00745  | TIGR00745(apbA_panE: 2-dehydropantoate 2-reductase)       |
| Supercontig_1.17_MV<br>LG_02325_11sp  | -1270,3845 | -1270,3845 | 0       | 0       | NS | 0 | 0 | 0 | 0 | 0 | 0 | 0 | 0 | 0 | 0 | hypothetical protein      | PF00521.13 | DNA_topoisoIV(DNA gyrase/topoisomerase IV, subunit A)     |
| Supercontig_1.1_MVL<br>G_00254_10sp   | -523,24429 | -523,24414 | 0,0003  | 0,00015 | NS | 0 | 0 | 0 | 0 | 0 | 0 | 0 | 0 | 0 | 0 | hypothetical protein      | PF00909.14 | Ammonium_transp(Ammonium Transporter Family)              |
| Supercontig_1.21_MV<br>LG_02678_9sp   | -1194,5089 | -1194,5045 | 0,00884 | 0,00441 | NS | 0 | 0 | 0 | 0 | 0 | 0 | 0 | 0 | 0 | 0 | hypothetical protein      | PF10544.2  | T5orf172(T5orf172 domain)                                 |
| Supercontig_1.124_MV<br>LG_06491_7sp  | -981,99195 | -981,99195 | 0       | 0       | NS | 0 | 0 | 0 | 0 | 0 | 0 | 0 | 0 | 0 | 0 | hypothetical protein      | PF08447.4  | PAS_3(PAS fold)                                           |
| Supercontig_1.16_MV<br>LG_02207_8sp   | -697,37167 | -697,37162 | 0       | 0       | NS | 0 | 0 | 0 | 0 | 0 | 0 | 0 | 0 | 0 | 0 | hypothetical protein      | NA         | NA                                                        |
| Supercontig_1.22_MV<br>LG_02690_7sp   | -274,10619 | -274,10614 | 0       | 0       | NS | 0 | 0 | 0 | 0 | 0 | 0 | 0 | 0 | 0 | 0 | hypothetical protein      | NA         | NA                                                        |
| Supercontig_1.41_MV<br>LG_04035_10sp  | -440,06901 | -440,06901 | 0       | 0       | NS | 0 | 0 | 0 | 0 | 0 | 0 | 0 | 0 | 0 | 0 | hypothetical protein      | PF01878.11 | DUF55(Protein of unknown function DUF55)                  |
| Supercontig_1.78_MV<br>LG_05602_8sp   | -932,60018 | -932,27866 | 0,64304 | 0,27495 | NS | 0 | 0 | 0 | 0 | 0 | 0 | 0 | 0 | 0 | 0 | hypothetical protein      | PF04082.11 | Fungal_trans(Fungal specific transcription factor domain) |
| Supercontig_1.3_MVL<br>G_00564_7sp    | -320,33429 | -320,33395 | 0,00068 | 0,00034 | NS | 0 | 0 | 0 | 0 | 0 | 0 | 0 | 0 | 0 | 0 | 40S ribosomal protein S21 | PF01249.11 | Ribosomal_S21e(Ribosomal protein S21e)                    |
| Supercontig_1.52_MV<br>LG_04575_9sp   | -527,80857 | -527,80857 | 0       | 0       | NS | 0 | 0 | 0 | 0 | 0 | 0 | 0 | 0 | 0 | 0 | hypothetical protein      | PF09685.3  | Tic20(Chloroplast import component protein (Tic20))       |
| Supercontig_1.27_MV<br>LG_03124_7sp   | -841,41797 | -841,41797 | 0       | 0       | NS | 0 | 0 | 0 | 0 | 0 | 0 | 0 | 0 | 0 | 0 | hypothetical protein      | PF00150.11 | Cellulase(Cellulase (glycosyl hydrolase family 5))        |
| Supercontig_1.23_MV<br>LG_02784_9sp   | -1022,7068 | -1022,7068 | 0       | 0       | NS | 0 | 0 | 0 | 0 | 0 | 0 | 0 | 0 | 0 | 0 | hypothetical protein      | PF03969.9  | AFG1_ATPase(AFG1-like ATPase)                             |
| Supercontig_1.81_MV<br>LG_05696_8sp   | -487,7696  | -486,56244 | 2,41432 | 0,70095 | NS | 0 | 0 | 0 | 0 | 0 | 0 | 0 | 0 | 0 | 0 | hypothetical protein      | PF01485.14 | IBR(IBR domain)                                           |
| Supercontig_1.74_MV<br>LG_05440_9sp   | -322,7828  | -322,78271 | 0,00018 | 0       | NS | 0 | 0 | 0 | 0 | 0 | 0 | 0 | 0 | 0 | 0 | hypothetical protein      | PF01967.14 | MoaC(MoaC family)                                         |
| Supercontig_1.4_MVL<br>G_00826_8sp    | -357,79207 | -357,79199 | 0,00016 | 0       | NS | 0 | 0 | 0 | 0 | 0 | 0 | 0 | 0 | 0 | 0 | hypothetical protein      | PF00704.21 | Glyco_hydro_18(Glycosyl hydrolases family 18)             |



|                                       |            |            |         |         |     |   |   |   |   |                                                     |            |                                                                                        |
|---------------------------------------|------------|------------|---------|---------|-----|---|---|---|---|-----------------------------------------------------|------------|----------------------------------------------------------------------------------------|
| Supercontig_1.54_MV<br>LG_04689_10sp  | -337,08527 | -337,08505 | 0,00044 | 0,00022 | NS  | 0 | □ | □ | □ | NADH-ubiquinone<br>oxidoreductase 49 kDa<br>subunit | TIGR01962  | TIGR01962(NuoD: NADH<br>dehydrogenase (quinone), D<br>subunit)                         |
| Supercontig_1.4_MVL<br>G_00700_9sp    | -373,33443 | -373,24556 | 0,17774 | 0,08504 | NS  | 0 | □ | □ | □ | hypothetical protein                                | PF00808.16 | CBFD_NFYB_HMF(Histone-like<br>transcription factor (CBF/NF-Y)<br>and archaeal histone) |
| Supercontig_1.31_MV<br>LG_03354_10sp  | -628,00947 | -628,00947 | 0       | 0       | NS  | 0 | □ | □ | □ | hypothetical protein                                | NA         | NA                                                                                     |
| Supercontig_1.95_MV<br>LG_06028_10sp  | -410,86204 | -410,47523 | 0,77362 | 0,32078 | NS  | 0 | □ | □ | □ | large subunit<br>ribosomal protein L13e             | PF01294.11 | Ribosomal_L13e(Ribosomal<br>protein L13e)                                              |
| Supercontig_1.75_MV<br>LG_05500_9sp   | -607,79356 | -607,76964 | 0,04784 | 0,02364 | NS  | 0 | □ | □ | □ | hypothetical protein                                | PF10334.2  | DUF2421(Protein of unknown<br>function (DUF2421))                                      |
| Supercontig_1.29_MV<br>LG_03227_10sp  | -557,4774  | -557,47721 | 0,00038 | 0,00019 | NS  | 0 | □ | □ | □ | isovaleryl-CoA<br>dehydrogenase                     | PF02770.12 | Acyl-CoA_dh_M(Acyl-CoA<br>dehydrogenase, middle domain)                                |
| Supercontig_1.9_MVL<br>G_01510_10sp   | -412,43038 | -412,01335 | 0,83406 | 0,341   | NS  | 0 | □ | □ | □ | hypothetical protein                                | PF00067.15 | p450(Cytochrome P450)                                                                  |
| Supercontig_1.7_MVL<br>G_01331_7sp    | -486,35686 | -486,33608 | 0,04156 | 0,02057 | NS  | 0 | □ | □ | □ | hypothetical protein                                | NA         | NA                                                                                     |
| Supercontig_1.28_MV<br>LG_03194_11sp  | -751,40931 | -746,48682 | 9,84498 | 0,99272 | *** | 0 | □ | □ | □ | hypothetical protein                                | PF10342.2  | Drmip_Hesp(Developmentally<br>Regulated MAPK Interacting<br>Protein)                   |
| Supercontig_1.54_MV<br>LG_04663_12sp  | -636,15195 | -636,15195 | 0       | 0       | NS  | 0 | □ | □ | □ | hypothetical protein                                | PF00787.17 | PX(PX domain)                                                                          |
| Supercontig_1.73_MV<br>LG_05426_6sp   | -934,91057 | -934,91054 | 0       | 0       | NS  | 0 | □ | □ | □ | hypothetical protein                                | PF09451.3  | ATG27(Autophagy-related<br>protein 27)                                                 |
| Supercontig_1.39_MV<br>LG_03847_11sp  | -566,00018 | -565,99998 | 0,0004  | 0,0002  | NS  | 0 | □ | □ | □ | hypothetical protein                                | NA         | NA                                                                                     |
| Supercontig_1.2_MVL<br>G_00453_11sp   | -433,78892 | -433,78892 | 0       | 0       | NS  | 0 | □ | □ | □ | hypothetical protein                                | PF00023.23 | Ank(Ankyrin repeat)                                                                    |
| Supercontig_1.135_MV<br>LG_06624_8sp  | -351,91917 | -351,91901 | 0,00032 | 0,00016 | NS  | 0 | □ | □ | □ | myosin regulatory light<br>chain cdc4               | NA         | NA                                                                                     |
| Supercontig_1.2_MVL<br>G_00344_6sp    | -905,62734 | -905,58389 | 0,0869  | 0,04252 | NS  | 0 | □ | □ | □ | inosine-5'-<br>monophosphate<br>dehydrogenase IMD4  | TIGR01302  | TIGR01302(IMP_dehydrog:<br>inosine-5'-monophosphate<br>dehydrogenase)                  |
| Supercontig_1.2_MVL<br>G_00391_12sp   | -517,30076 | -517,30075 | 0       | 0       | NS  | 0 | □ | □ | □ | hypothetical protein                                | NA         | NA                                                                                     |
| Supercontig_1.92_MV<br>LG_05962_9sp   | -603,49926 | -603,49926 | 0       | 0       | NS  | 0 | □ | □ | □ | ATP-dependent rRNA<br>helicase RRP3                 | PF00270.22 | DEAD(DEAD/DEAH box<br>helicase)                                                        |
| Supercontig_1.160_MV<br>LG_06855_11sp | -348,27866 | -348,27859 | 0       | 0       | NS  | 0 | □ | □ | □ | glycine cleavage<br>system T protein                | TIGR00528  | TIGR00528(gcvT: glycine<br>cleavage system T protein)                                  |
| Supercontig_1.1_MVL<br>G_00042_11sp   | -392,33818 | -391,81182 | 1,05272 | 0,40925 | NS  | 0 | □ | □ | □ | hypothetical protein                                | NA         | NA                                                                                     |
| Supercontig_1.34_MV<br>LG_03522_9sp   | -554,55292 | -554,55281 | 0,00022 | 0,00011 | NS  | 0 | □ | □ | □ | hypothetical protein                                | NA         | NA                                                                                     |
| Supercontig_1.25_MV<br>LG_02955_6sp   | -1364,7928 | -1364,63   | 0,32562 | 0,15025 | NS  | 0 | □ | □ | □ | hypothetical protein                                | NA         | NA                                                                                     |
| Supercontig_1.11_MV<br>LG_01704_10sp  | -657,74035 | -657,61008 | 0,26054 | 0,12214 | NS  | 0 | □ | □ | □ | hypothetical protein                                | NA         | NA                                                                                     |

|                                      |            |            |         |         |    |   |   |   |   |   |   |   |   |   |   |   |   |   |   |   |                      |            |                                                         |
|--------------------------------------|------------|------------|---------|---------|----|---|---|---|---|---|---|---|---|---|---|---|---|---|---|---|----------------------|------------|---------------------------------------------------------|
| Supercontig_1.11_MV<br>LG_01761_10sp | -355,00931 | -355,00931 | 0       | 0       | NS | 0 | 0 | 0 | 0 | 0 | 0 | 0 | 0 | 0 | 0 | 0 | 0 | 0 | 0 | 0 | hypothetical protein | PF04727.6  | ELMO_CED12(ELMO/CED-12 family)                          |
| Supercontig_1.5_MVL<br>G_01001_9sp   | -335,00948 | -335,00939 | 0,00018 | 0       | NS | 0 | 0 | 0 | 0 | 0 | 0 | 0 | 0 | 0 | 0 | 0 | 0 | 0 | 0 | 0 | hypothetical protein | PF00096.19 | zf-C2H2(Zinc finger, C2H2 type)                         |
| Supercontig_1.4_MVL<br>G_00687_10sp  | -572,6703  | -571,88671 | 1,56718 | 0,54324 | NS | 0 | 0 | 0 | 0 | 0 | 0 | 0 | 0 | 0 | 0 | 0 | 0 | 0 | 0 | 0 | hypothetical protein | PF05625.4  | PAXNEB(PAXNEB protein)                                  |
| Supercontig_1.3_MVL<br>G_00544_6sp   | -326,63834 | -326,63834 | 0       | 0       | NS | 0 | 0 | 0 | 0 | 0 | 0 | 0 | 0 | 0 | 0 | 0 | 0 | 0 | 0 | 0 | hypothetical protein | PF04099.5  | Sybindin(Sybindin-like family)                          |
| Supercontig_1.2_MVL<br>G_00332_9sp   | -677,26064 | -677,26064 | 0       | 0       | NS | 0 | 0 | 0 | 0 | 0 | 0 | 0 | 0 | 0 | 0 | 0 | 0 | 0 | 0 | 0 | hypothetical protein | PF07690.9  | MFS_1(Major Facilitator Superfamily)                    |
| Supercontig_1.29_MV<br>LG_03246_7sp  | -569,97353 | -568,08199 | 3,78308 | 0,84916 | NS | 0 | 0 | 0 | 0 | 0 | 0 | 0 | 0 | 0 | 0 | 0 | 0 | 0 | 0 | 0 | hypothetical protein | NA         | NA                                                      |
| Supercontig_1.46_MV<br>LG_04256_11sp | -763,88788 | -763,88753 | 0,0007  | 0,00035 | NS | 0 | 0 | 0 | 0 | 0 | 0 | 0 | 0 | 0 | 0 | 0 | 0 | 0 | 0 | 0 | hypothetical protein | PF00787.17 | PX(PX domain)                                           |
| Supercontig_1.35_MV<br>LG_03585_11sp | -499,88843 | -499,87925 | 0,01836 | 0,00914 | NS | 0 | 0 | 0 | 0 | 0 | 0 | 0 | 0 | 0 | 0 | 0 | 0 | 0 | 0 | 0 | hypothetical protein | NA         | NA                                                      |
| Supercontig_1.17_MV<br>LG_02262_7sp  | -809,84328 | -809,84328 | 0       | 0       | NS | 0 | 0 | 0 | 0 | 0 | 0 | 0 | 0 | 0 | 0 | 0 | 0 | 0 | 0 | 0 | hypothetical protein | PF04004.6  | Leo1(Leo1-like protein)                                 |
| Supercontig_1.28_MV<br>LG_03176_8sp  | -621,04422 | -621,04422 | 0       | 0       | NS | 0 | 0 | 0 | 0 | 0 | 0 | 0 | 0 | 0 | 0 | 0 | 0 | 0 | 0 | 0 | hypothetical protein | PF00378.13 | ECH(Enoyl-CoA hydratase/isomerase family)               |
| Supercontig_1.44_MV<br>LG_04154_10sp | -540,54675 | -538,43869 | 4,21612 | 0,87853 | NS | 0 | 0 | 0 | 0 | 0 | 0 | 0 | 0 | 0 | 0 | 0 | 0 | 0 | 0 | 0 | hypothetical protein | NA         | NA                                                      |
| Supercontig_1.49_MV<br>LG_04414_7sp  | -367,85385 | -367,85383 | 0       | 0       | NS | 0 | 0 | 0 | 0 | 0 | 0 | 0 | 0 | 0 | 0 | 0 | 0 | 0 | 0 | 0 | hypothetical protein | PF10499.2  | Pmp24(Peroxisomal membrane protein 24)                  |
| Supercontig_1.2_MVL<br>G_00442_11sp  | -472,45634 | -472,45634 | 0       | 0       | NS | 0 | 0 | 0 | 0 | 0 | 0 | 0 | 0 | 0 | 0 | 0 | 0 | 0 | 0 | 0 | hypothetical protein | NA         | NA                                                      |
| Supercontig_1.112_MV<br>LG_06331_8sp | -898,19971 | -898,19971 | 0       | 0       | NS | 0 | 0 | 0 | 0 | 0 | 0 | 0 | 0 | 0 | 0 | 0 | 0 | 0 | 0 | 0 | hypothetical protein | PF09333.4  | ATG_C(ATG C terminal domain)                            |
| Supercontig_1.38_MV<br>LG_03785_6sp  | -469,78115 | -469,7811  | 0,0001  | 0       | NS | 0 | 0 | 0 | 0 | 0 | 0 | 0 | 0 | 0 | 0 | 0 | 0 | 0 | 0 | 0 | hypothetical protein | NA         | NA                                                      |
| Supercontig_1.41_MV<br>LG_03983_10sp | -914,92043 | -914,92003 | 0,0008  | 0,0004  | NS | 0 | 0 | 0 | 0 | 0 | 0 | 0 | 0 | 0 | 0 | 0 | 0 | 0 | 0 | 0 | hypothetical protein | PF02463.12 | SMC_N(RecF/RecN/SMC N terminal domain)                  |
| Supercontig_1.75_MV<br>LG_05482_12sp | -1191,1059 | -1188,1416 | 5,9286  | 0,9484  | *  | 0 | 0 | 0 | 0 | 0 | 0 | 0 | 0 | 0 | 0 | 0 | 0 | 0 | 0 | 0 | hypothetical protein | PF07064.6  | RIC1(RIC1)                                              |
| Supercontig_1.91_MV<br>LG_05920_9sp  | -600,32005 | -599,76513 | 1,10984 | 0,42588 | NS | 0 | 0 | 0 | 0 | 0 | 0 | 0 | 0 | 0 | 0 | 0 | 0 | 0 | 0 | 0 | hypothetical protein | NA         | NA                                                      |
| Supercontig_1.15_MV<br>LG_02125_10sp | -351,82385 | -351,82379 | 0,00012 | 0       | NS | 0 | 0 | 0 | 0 | 0 | 0 | 0 | 0 | 0 | 0 | 0 | 0 | 0 | 0 | 0 | hypothetical protein | PF00856.21 | SET(SET domain)                                         |
| Supercontig_1.69_MV<br>LG_05303_8sp  | -424,93433 | -424,93433 | 0       | 0       | NS | 0 | 0 | 0 | 0 | 0 | 0 | 0 | 0 | 0 | 0 | 0 | 0 | 0 | 0 | 0 | hypothetical protein | PF11034.1  | DUF2823(Protein of unknown function (DUF2823))          |
| Supercontig_1.11_MV<br>LG_01760_9sp  | -800,50535 | -800,44101 | 0,12868 | 0,06231 | NS | 0 | 0 | 0 | 0 | 0 | 0 | 0 | 0 | 0 | 0 | 0 | 0 | 0 | 0 | 0 | hypothetical protein | NA         | NA                                                      |
| Supercontig_1.5_MVL<br>G_01022_9sp   | -831,2069  | -831,2069  | 0       | 0       | NS | 0 | 0 | 0 | 0 | 0 | 0 | 0 | 0 | 0 | 0 | 0 | 0 | 0 | 0 | 0 | hypothetical protein | PF07690.9  | MFS_1(Major Facilitator Superfamily)                    |
| Supercontig_1.1_MVL<br>G_00234_6sp   | -569,1541  | -569,15408 | 0       | 0       | NS | 0 | 0 | 0 | 0 | 0 | 0 | 0 | 0 | 0 | 0 | 0 | 0 | 0 | 0 | 0 | hypothetical protein | PF01423.15 | LSM(LSM domain)                                         |
| Supercontig_1.4_MVL<br>G_00728_8sp   | -594,14542 | -594,14533 | 0,00018 | 0       | NS | 0 | 0 | 0 | 0 | 0 | 0 | 0 | 0 | 0 | 0 | 0 | 0 | 0 | 0 | 0 | hypothetical protein | PF08551.3  | DUF1751(Eukaryotic integral membrane protein (DUF1751)) |
| Supercontig_1.67_MV<br>LG_05204_8sp  | -751,86542 | -751,86502 | 0,0008  | 0,0004  | NS | 0 | 0 | 0 | 0 | 0 | 0 | 0 | 0 | 0 | 0 | 0 | 0 | 0 | 0 | 0 | hypothetical protein | PF08590.3  | DUF1771(Domain of unknown function (DUF1771))           |

|                                       |            |            |         |         |    |   |   |   |   |   |   |   |   |   |                                        |            |                                                                             |
|---------------------------------------|------------|------------|---------|---------|----|---|---|---|---|---|---|---|---|---|----------------------------------------|------------|-----------------------------------------------------------------------------|
| Supercontig_1.28_MV<br>LG_03201_6sp   | -1112,8193 | -1112,7755 | 0,08772 | 0,04291 | NS | 0 | ☐ | ☐ | ☐ | ☐ | ☐ | ☐ | ☐ | ☐ | hypothetical protein                   | PF12171.1  | zf-C2H2_jaz(Zinc-finger double-stranded RNA-binding)                        |
| Supercontig_1.51_MV<br>LG_04503_10sp  | -1875,4389 | -1875,4389 | 0       | 0       | NS | 0 | ☐ | ☐ | ☐ | ☐ | ☐ | ☐ | ☐ | ☐ | hypothetical protein                   | NA         | NA                                                                          |
| Supercontig_1.67_MV<br>LG_05218_8sp   | -676,57164 | -676,57152 | 0,00024 | 0,00012 | NS | 0 | ☐ | ☐ | ☐ | ☐ | ☐ | ☐ | ☐ | ☐ | hypothetical protein                   | PF10235.2  | Cript(Microtubule-associated protein CRIPT)                                 |
| Supercontig_1.74_MV<br>LG_05462_12sp  | -550,55448 | -550,55448 | 0       | 0       | NS | 0 | ☐ | ☐ | ☐ | ☐ | ☐ | ☐ | ☐ | ☐ | hypothetical protein                   | NA         | NA                                                                          |
| Supercontig_1.6_MVL<br>G_01168_8sp    | -389,3148  | -389,31466 | 0,00028 | 0,00014 | NS | 0 | ☐ | ☐ | ☐ | ☐ | ☐ | ☐ | ☐ | ☐ | hypothetical protein                   | PF05047.9  | L51_S25_Cl-B8(Mitochondrial ribosomal protein L51 / S25 / Cl-B8 domain)     |
| Supercontig_1.9_MVL<br>G_01574_11sp   | -405,76499 | -405,76499 | 0       | 0       | NS | 0 | ☐ | ☐ | ☐ | ☐ | ☐ | ☐ | ☐ | ☐ | hypothetical protein                   | NA         | NA                                                                          |
| Supercontig_1.3_MVL<br>G_00660_8sp    | -350,41129 | -350,41103 | 0,00052 | 0,00026 | NS | 0 | ☐ | ☐ | ☐ | ☐ | ☐ | ☐ | ☐ | ☐ | ADP-ribosylation factor-like protein 1 | PF04670.5  | Gtr1_RagA(Gtr1/RagA G protein conserved region)                             |
| Supercontig_1.186_MV<br>LG_07028_7sp  | -618,00821 | -618,00803 | 0,00036 | 0,00018 | NS | 0 | ☐ | ☐ | ☐ | ☐ | ☐ | ☐ | ☐ | ☐ | hypothetical protein                   | NA         | NA                                                                          |
| Supercontig_1.111_MV<br>LG_06303_10sp | -512,36283 | -512,36281 | 0       | 0       | NS | 0 | ☐ | ☐ | ☐ | ☐ | ☐ | ☐ | ☐ | ☐ | hypothetical protein                   | PF08314.4  | Sec39(Secretory pathway protein Sec39)                                      |
| Supercontig_1.92_MV<br>LG_05957_6sp   | -355,79685 | -355,68464 | 0,22442 | 0,10614 | NS | 0 | ☐ | ☐ | ☐ | ☐ | ☐ | ☐ | ☐ | ☐ | hypothetical protein                   | NA         | NA                                                                          |
| Supercontig_1.57_MV<br>LG_04815_8sp   | -343,17172 | -343,17172 | 0       | 0       | NS | 0 | ☐ | ☐ | ☐ | ☐ | ☐ | ☐ | ☐ | ☐ | hypothetical protein                   | NA         | NA                                                                          |
| Supercontig_1.5_MVL<br>G_00900_11sp   | -334,0404  | -334,0404  | 0       | 0       | NS | 0 | ☐ | ☐ | ☐ | ☐ | ☐ | ☐ | ☐ | ☐ | hypothetical protein                   | PF01553.14 | Acyltransferase(Acyltransferase)                                            |
| Supercontig_1.95_MV<br>LG_06010_7sp   | -1258,2877 | -1258,2871 | 0,00122 | 0,00061 | NS | 0 | ☐ | ☐ | ☐ | ☐ | ☐ | ☐ | ☐ | ☐ | hypothetical protein                   | PF00013.22 | KH_1(KH domain)                                                             |
| Supercontig_1.4_MVL<br>G_00776_7sp    | -576,41496 | -576,38755 | 0,05482 | 0,02704 | NS | 0 | ☐ | ☐ | ☐ | ☐ | ☐ | ☐ | ☐ | ☐ | hypothetical protein                   | PF00641.11 | zf-RanBP(Zn-finger in Ran binding protein and others)                       |
| Supercontig_1.17_MV<br>LG_02290_9sp   | -605,56329 | -605,56322 | 0,00014 | 0       | NS | 0 | ☐ | ☐ | ☐ | ☐ | ☐ | ☐ | ☐ | ☐ | hypothetical protein                   | PF08447.4  | PAS_3(PAS fold)                                                             |
| Supercontig_1.8_MVL<br>G_01405_11sp   | -548,00732 | -548,00721 | 0,00022 | 0,00011 | NS | 0 | ☐ | ☐ | ☐ | ☐ | ☐ | ☐ | ☐ | ☐ | hypothetical protein                   | PF00383.15 | dCMP_cyt_deam_1(Cytidine and deoxycytidylate deaminase zinc-binding region) |
| Supercontig_1.31_MV<br>LG_03377_11sp  | -801,57017 | -801,48124 | 0,17786 | 0,08509 | NS | 0 | ☐ | ☐ | ☐ | ☐ | ☐ | ☐ | ☐ | ☐ | hypothetical protein                   | PF04683.6  | Proteasom_Rpn13(Proteasome complex subunit Rpn13 ubiquitin receptor)        |
| Supercontig_1.25_MV<br>LG_02950_7sp   | -1127,2652 | -1127,0808 | 0,36878 | 0,16839 | NS | 0 | ☐ | ☐ | ☐ | ☐ | ☐ | ☐ | ☐ | ☐ | hypothetical protein                   | PF04494.8  | TFIID_90kDa(WD40 associated region in TFIID subunit)                        |
| Supercontig_1.25_MV<br>LG_02981_9sp   | -390,96017 | -390,96017 | 0       | 0       | NS | 0 | ☐ | ☐ | ☐ | ☐ | ☐ | ☐ | ☐ | ☐ | hypothetical protein                   | PF04479.6  | RTA1(RTA1 like protein)                                                     |
| Supercontig_1.205_MV<br>LG_07111_9sp  | -504,43262 | -504,29455 | 0,27614 | 0,12896 | NS | 0 | ☐ | ☐ | ☐ | ☐ | ☐ | ☐ | ☐ | ☐ | hypothetical protein                   | PF00107.19 | ADH_zinc_N(Zinc-binding dehydrogenase)                                      |
| Supercontig_1.24_MV<br>LG_02831_10sp  | -639,25008 | -638,74643 | 1,0073  | 0,39568 | NS | 0 | ☐ | ☐ | ☐ | ☐ | ☐ | ☐ | ☐ | ☐ | hypothetical protein                   | PF07690.9  | MFS_1(Major Facilitator Superfamily)                                        |
| Supercontig_1.47_MV<br>LG_04301_10sp  | -946,38594 | -946,27721 | 0,21746 | 0,10303 | NS | 0 | ☐ | ☐ | ☐ | ☐ | ☐ | ☐ | ☐ | ☐ | hypothetical protein                   | NA         | NA                                                                          |

|                                       |            |            |         |         |    |   |  |  |  |  |                                           |            |                                                                      |
|---------------------------------------|------------|------------|---------|---------|----|---|--|--|--|--|-------------------------------------------|------------|----------------------------------------------------------------------|
| Supercontig_1.65_MV<br>LG_05130_9sp   | -436,20372 | -436,20362 | 0       | 0       | NS | 0 |  |  |  |  | 40S ribosomal protein<br>S12              | PF01248.19 | Ribosomal_L7Ae(Ribosomal<br>protein L7Ae/L30e/S12e/Gadd45<br>family) |
| Supercontig_1.39_MV<br>LG_03885_7sp   | -451,88449 | -451,88445 | 0       | 0       | NS | 0 |  |  |  |  | hypothetical protein                      | PF04430.7  | DUF498(Protein of unknown<br>function (DUF498/DUF598))               |
| Supercontig_1.6_MVL<br>G_01082_9sp    | -501,16935 | -501,16935 | 0       | 0       | NS | 0 |  |  |  |  | hypothetical protein                      | PF03330.11 | DPBB_1(Rare lipoprotein A<br>(RlpA)-like double-psi beta-<br>barrel) |
| Supercontig_1.3_MVL<br>G_00609_8sp    | -392,64762 | -391,76601 | 1,76322 | 0,58588 | NS | 0 |  |  |  |  | hypothetical protein                      | NA         | NA                                                                   |
| Supercontig_1.75_MV<br>LG_05487_12sp  | -1191,0756 | -1189,657  | 2,8373  | 0,75796 | NS | 0 |  |  |  |  | hypothetical protein                      | PF10310.2  | DUF2413(Protein of unknown<br>function (DUF2413))                    |
| Supercontig_1.165_MV<br>LG_06903_9sp  | -352,2457  | -352,2457  | 0       | 0       | NS | 0 |  |  |  |  | hypothetical protein                      | PF05817.7  | Ribophorin_II(Oligosaccharyltran<br>sferase subunit Ribophorin II)   |
| Supercontig_1.20_MV<br>LG_02535_8sp   | -445,72906 | -445,72906 | 0       | 0       | NS | 0 |  |  |  |  | hypothetical protein                      | NA         | NA                                                                   |
| Supercontig_1.9_MVL<br>G_01517_10sp   | -1520,6983 | -1518,9659 | 3,46482 | 0,82314 | NS | 0 |  |  |  |  | hypothetical protein                      | PF07529.6  | HSA(HSA)                                                             |
| Supercontig_1.15_MV<br>LG_02133_8sp   | -542,19594 | -541,74552 | 0,90084 | 0,36264 | NS | 0 |  |  |  |  | hypothetical protein                      | PF10382.2  | DUF2439(Protein of unknown<br>function (DUF2439))                    |
| Supercontig_1.202_MV<br>LG_07092_8sp  | -377,80621 | -377,80621 | 0       | 0       | NS | 0 |  |  |  |  | beta-glucosidase 1B                       | PF00232.11 | Glyco_hydro_1(Glycosyl<br>hydrolase family 1)                        |
| Supercontig_1.38_MV<br>LG_03798_6sp   | -1131,5021 | -1131,5021 | 0       | 0       | NS | 0 |  |  |  |  | hypothetical protein                      | NA         | NA                                                                   |
| Supercontig_1.135_MV<br>LG_06634_10sp | -423,4394  | -423,33829 | 0,20222 | 0,09617 | NS | 0 |  |  |  |  | hypothetical protein                      | NA         | NA                                                                   |
| Supercontig_1.6_MVL<br>G_01066_9sp    | -539,89117 | -539,89117 | 0       | 0       | NS | 0 |  |  |  |  | hypothetical protein                      | PF06687.5  | SUR7(SUR7/Pall family)                                               |
| Supercontig_1.35_MV<br>LG_03582_11sp  | -1274,1195 | -1274,1194 | 0       | 0       | NS | 0 |  |  |  |  | DNA polymerase delta<br>catalytic subunit | TIGR00592  | TIGR00592(pol2: DNA<br>polymerase (pol2))                            |
| Supercontig_1.28_MV<br>LG_03202_7sp   | -1129,2105 | -1128,9981 | 0,42484 | 0,19137 | NS | 0 |  |  |  |  | hypothetical protein                      | PF06268.6  | Fascin(Fascin domain)                                                |
| Supercontig_1.6_MVL<br>G_01197_10sp   | -636,09374 | -636,09028 | 0,00692 | 0,00345 | NS | 0 |  |  |  |  | protein Ras-2                             | PF08477.6  | Miro(Miro-like protein)                                              |
| Supercontig_1.23_MV<br>LG_02807_9sp   | -606,01652 | -606,01652 | 0       | 0       | NS | 0 |  |  |  |  | hypothetical protein                      | PF00400.25 | WD40(WD domain, G-beta<br>repeat)                                    |
| Supercontig_1.42_MV<br>LG_04072_7sp   | -671,77356 | -671,77342 | 0,00028 | 0,00014 | NS | 0 |  |  |  |  | hypothetical protein                      | PF01095.12 | Pectinesterase(Pectinesterase)                                       |
| Supercontig_1.51_MV<br>LG_04495_8sp   | -621,56262 | -621,56262 | 0       | 0       | NS | 0 |  |  |  |  | hypothetical protein                      | PF02668.9  | TauD(Taurine catabolism<br>dioxxygenase TauD, TfdA family)           |
| Supercontig_1.46_MV<br>LG_04280_9sp   | -380,65171 | -380,65171 | 0       | 0       | NS | 0 |  |  |  |  | homoserine kinase                         | PF00288.19 | GHMP_kinases_N(GHMP<br>kinases N terminal domain)                    |
| Supercontig_1.62_MV<br>LG_05036_9sp   | -580,80608 | -580,80608 | 0       | 0       | NS | 0 |  |  |  |  | hypothetical protein                      | PF01063.12 | Aminotran_4(Aminotransferase<br>class IV)                            |
| Supercontig_1.21_MV<br>LG_02675_10sp  | -410,00987 | -409,8782  | 0,26334 | 0,12337 | NS | 0 |  |  |  |  | hypothetical protein                      | NA         | NA                                                                   |

|                                      |            |            |         |         |     |   |   |   |   |   |                                                 |            |                                                                          |
|--------------------------------------|------------|------------|---------|---------|-----|---|---|---|---|---|-------------------------------------------------|------------|--------------------------------------------------------------------------|
| Supercontig_1.2_MVL<br>G_00373_10sp  | -458,40661 | -458,40661 | 0       | 0       | NS  | 0 | 0 | 0 | 0 | 0 | hypothetical protein                            | PF00596.14 | Aldolase_II(Class II Aldolase and Adducin N-terminal domain)             |
| Supercontig_1.73_MV<br>LG_05430_11sp | -515,5349  | -515,52873 | 0,01234 | 0,00615 | NS  | 0 | 0 | 0 | 0 | 0 | hypothetical protein                            | PF07716.8  | bZIP_2(Basic region leucine zipper)                                      |
| Supercontig_1.74_MV<br>LG_05467_7sp  | -615,492   | -615,492   | 0       | 0       | NS  | 0 | 0 | 0 | 0 | 0 | aldehyde<br>dehydrogenase family<br>7 member A1 | PF00171.15 | Aldedh(Aldehyde dehydrogenase family)                                    |
| Supercontig_1.20_MV<br>LG_02596_10sp | -325,83912 | -325,74397 | 0,1903  | 0,09076 | NS  | 0 | 0 | 0 | 0 | 0 | hypothetical protein                            | PF00076.15 | RRM_1(RNA recognition motif. (a.k.a. RRM, RBD, or RNP domain))           |
| Supercontig_1.28_MV<br>LG_03128_8sp  | -499,47275 | -498,91894 | 1,10762 | 0,42524 | NS  | 0 | 0 | 0 | 0 | 0 | hypothetical protein                            | PF05175.7  | MTS(Methyltransferase small domain)                                      |
| Supercontig_1.54_MV<br>LG_04679_6sp  | -651,43401 | -651,43379 | 0,00044 | 0,00022 | NS  | 0 | 0 | 0 | 0 | 0 | enolase                                         | PF00113.15 | Enolase_C(Enolase, C-terminal TIM barrel domain)                         |
| Supercontig_1.47_MV<br>LG_04325_10sp | -500,98545 | -499,47643 | 3,01804 | 0,77887 | NS  | 0 | 0 | 0 | 0 | 0 | hypothetical protein                            | NA         | NA                                                                       |
| Supercontig_1.59_MV<br>LG_04889_6sp  | -429,07168 | -429,07103 | 0,0013  | 0,00065 | NS  | 0 | 0 | 0 | 0 | 0 | hypothetical protein                            | PF00227.19 | Proteasome(Proteasome subunit)                                           |
| Supercontig_1.47_MV<br>LG_04323_6sp  | -301,72816 | -301,47805 | 0,50022 | 0,22128 | NS  | 0 | 0 | 0 | 0 | 0 | hypothetical protein                            | PF12585.1  | DUF3759(Protein of unknown function (DUF3759))                           |
| Supercontig_1.27_MV<br>LG_03070_9sp  | -1199,2336 | -1194,1303 | 10,2066 | 0,99392 | *** | 0 | 0 | 0 | 0 | 0 | hypothetical protein                            | PF07646.8  | Kelch_2(Kelch motif)                                                     |
| Supercontig_1.52_MV<br>LG_04572_8sp  | -1118,3389 | -1115,8082 | 5,0614  | 0,9204  | *   | 0 | 0 | 0 | 0 | 0 | hypothetical protein                            | PF00955.14 | HCO3_cotransp(HCO3- transporter family)                                  |
| Supercontig_1.18_MV<br>LG_02366_7sp  | -336,39164 | -336,39164 | 0       | 0       | NS  | 0 | 0 | 0 | 0 | 0 | hypothetical protein                            | NA         | NA                                                                       |
| Supercontig_1.7_MVL<br>G_01233_8sp   | -455,96336 | -455,96336 | 0       | 0       | NS  | 0 | 0 | 0 | 0 | 0 | hypothetical protein                            | TIGR02245  | TIGR02245(HAD_IIID1: HAD hydrolase, family IIID)                         |
| Supercontig_1.36_MV<br>LG_03670_10sp | -250,83674 | -250,83646 | 0,00056 | 0,00028 | NS  | 0 | 0 | 0 | 0 | 0 | casein kinase 2, beta polypeptide               | PF01214.11 | CK_II_beta(Casein kinase II regulatory subunit)                          |
| Supercontig_1.172_MV<br>LG_06955_8sp | -311,57917 | -311,57917 | 0       | 0       | NS  | 0 | 0 | 0 | 0 | 0 | hypothetical protein                            | PF04178.5  | Got1(Got1/Sft2-like family)                                              |
| Supercontig_1.41_MV<br>LG_03987_12sp | -440,24404 | -440,24404 | 0       | 0       | NS  | 0 | 0 | 0 | 0 | 0 | hypothetical protein                            | PF10350.2  | DUF2428(Putative death-receptor fusion protein (DUF2428))                |
| Supercontig_1.53_MV<br>LG_04633_10sp | -1200,821  | -1200,821  | 0       | 0       | NS  | 0 | 0 | 0 | 0 | 0 | hypothetical protein                            | PF09296.4  | NUDIX-like(NADH pyrophosphatase-like rudimentary NUDIX domain)           |
| Supercontig_1.30_MV<br>LG_03304_9sp  | -373,28191 | -373,2819  | 0       | 0       | NS  | 0 | 0 | 0 | 0 | 0 | hypothetical protein                            | PF00106.18 | adh_short(short chain dehydrogenase)                                     |
| Supercontig_1.67_MV<br>LG_05201_9sp  | -425,63343 | -425,63343 | 0       | 0       | NS  | 0 | 0 | 0 | 0 | 0 | hypothetical protein                            | TIGR00727  | TIGR00727(ISP4_OPT: small oligopeptide transporter, OPT family)          |
| Supercontig_1.9_MVL<br>G_01523_11sp  | -603,04753 | -602,67669 | 0,74168 | 0,30985 | NS  | 0 | 0 | 0 | 0 | 0 | hypothetical protein                            | NA         | NA                                                                       |
| Supercontig_1.94_MV<br>LG_05998_8sp  | -585,23251 | -585,23251 | 0       | 0       | NS  | 0 | 0 | 0 | 0 | 0 | hypothetical protein                            | PF01663.15 | Phosphodiesterase(Type I phosphodiesterase / nucleotide pyrophosphatase) |
| Supercontig_1.38_MV<br>LG_03773_9sp  | -1330,6083 | -1330,6083 | 0       | 0       | NS  | 0 | 0 | 0 | 0 | 0 | hypothetical protein                            | PF07093.4  | SGT1(SGT1 protein)                                                       |

|                                      |            |            |         |         |    |   |   |   |   |   |   |   |   |   |                                  |            |                                                                                  |
|--------------------------------------|------------|------------|---------|---------|----|---|---|---|---|---|---|---|---|---|----------------------------------|------------|----------------------------------------------------------------------------------|
| Supercontig_1.174_MV<br>LG_06963_6sp | -888,09471 | -888,09471 | 0       | 0       | NS | 0 | 0 | 0 | 0 | 0 | 0 | 0 | 0 | 0 | hypothetical protein             | PF04488.8  | Gly_transf_sug(Glycosyltransferase sugar-binding region containing DXD motif)    |
| Supercontig_1.4_MVL<br>G_00828_11sp  | -1072,4159 | -1072,4159 | 0       | 0       | NS | 0 | 0 | 0 | 0 | 0 | 0 | 0 | 0 | 0 | hypothetical protein             | PF08241.5  | Methyltransf_11(Methyltransferase domain)                                        |
| Supercontig_1.19_MV<br>LG_02450_12sp | -870,26664 | -869,01337 | 2,50654 | 0,71443 | NS | 0 | 0 | 0 | 0 | 0 | 0 | 0 | 0 | 0 | hypothetical protein             | PF03221.9  | Transposase_Tc5(Tc5 transposase DNA-binding domain)                              |
| Supercontig_1.14_MV<br>LG_02011_10sp | -477,87953 | -477,87953 | 0       | 0       | NS | 0 | 0 | 0 | 0 | 0 | 0 | 0 | 0 | 0 | hypothetical protein             | TIGR01697  | TIGR01697(PNPH-PUNA-XAPA: inosine guanosine and xanthosine phosphorylase family) |
| Supercontig_1.7_MVL<br>G_01263_6sp   | -1077,6308 | -1077,2496 | 0,7624  | 0,31696 | NS | 0 | 0 | 0 | 0 | 0 | 0 | 0 | 0 | 0 | hypothetical protein             | PF03097.11 | BRO1(BRO1-like domain)                                                           |
| Supercontig_1.35_MV<br>LG_03606_8sp  | -749,41258 | -748,90556 | 1,01404 | 0,39771 | NS | 0 | 0 | 0 | 0 | 0 | 0 | 0 | 0 | 0 | hypothetical protein             | PF00153.20 | Mito_carr(Mitochondrial carrier protein)                                         |
| Supercontig_1.44_MV<br>LG_04158_7sp  | -400,45827 | -400,45821 | 0,00012 | 0       | NS | 0 | 0 | 0 | 0 | 0 | 0 | 0 | 0 | 0 | hypothetical protein             | NA         | NA                                                                               |
| Supercontig_1.20_MV<br>LG_02581_8sp  | -460,34171 | -459,71495 | 1,25352 | 0,46568 | NS | 0 | 0 | 0 | 0 | 0 | 0 | 0 | 0 | 0 | hypothetical protein             | NA         | NA                                                                               |
| Supercontig_1.33_MV<br>LG_03481_7sp  | -533,57872 | -533,57864 | 0,00016 | 0       | NS | 0 | 0 | 0 | 0 | 0 | 0 | 0 | 0 | 0 | methionine-R-sulfoxide reductase | PF01641.11 | SeIR(SelR domain)                                                                |
| Supercontig_1.26_MV<br>LG_03014_9sp  | -373,63356 | -373,63348 | 0,00016 | 0       | NS | 0 | 0 | 0 | 0 | 0 | 0 | 0 | 0 | 0 | pre-mRNA-splicing factor SLT11   | PF00076.15 | RRM_1(RNA recognition motif. (a.k.a. RRM, RBD, or RNP domain))                   |
| Supercontig_1.55_MV<br>LG_04735_6sp  | -948,66524 | -948,19929 | 0,9319  | 0,37246 | NS | 0 | 0 | 0 | 0 | 0 | 0 | 0 | 0 | 0 | hypothetical protein             | PF00076.15 | RRM_1(RNA recognition motif. (a.k.a. RRM, RBD, or RNP domain))                   |
| Supercontig_1.66_MV<br>LG_05185_8sp  | -307,68534 | -307,25768 | 0,85532 | 0,34797 | NS | 0 | 0 | 0 | 0 | 0 | 0 | 0 | 0 | 0 | hypothetical protein             | PF00107.19 | ADH_zinc_N(Zinc-binding dehydrogenase)                                           |
| Supercontig_1.18_MV<br>LG_02389_11sp | -364,30995 | -364,3099  | 0       | 0       | NS | 0 | 0 | 0 | 0 | 0 | 0 | 0 | 0 | 0 | hypothetical protein             | PF05739.12 | SNARE(SNARE domain)                                                              |
| Supercontig_1.1_MVL<br>G_00270_7sp   | -270,6111  | -270,61105 | 0       | 0       | NS | 0 | 0 | 0 | 0 | 0 | 0 | 0 | 0 | 0 | hypothetical protein             | NA         | NA                                                                               |
| Supercontig_1.45_MV<br>LG_04191_10sp | -649,7221  | -649,7221  | 0       | 0       | NS | 0 | 0 | 0 | 0 | 0 | 0 | 0 | 0 | 0 | hypothetical protein             | PF00503.13 | G-alpha(G-protein alpha subunit)                                                 |
| Supercontig_1.33_MV<br>LG_03444_11sp | -1017,5656 | -1017,5656 | 0       | 0       | NS | 0 | 0 | 0 | 0 | 0 | 0 | 0 | 0 | 0 | hypothetical protein             | NA         | NA                                                                               |
| Supercontig_1.25_MV<br>LG_02957_7sp  | -491,89224 | -490,77762 | 2,22924 | 0,67196 | NS | 0 | 0 | 0 | 0 | 0 | 0 | 0 | 0 | 0 | hypothetical protein             | NA         | NA                                                                               |
| Supercontig_1.52_MV<br>LG_04573_12sp | -586,13388 | -586,12235 | 0,02306 | 0,01146 | NS | 0 | 0 | 0 | 0 | 0 | 0 | 0 | 0 | 0 | hypothetical protein             | PF05193.14 | Peptidase_M16_C(Peptidase M16 inactive domain)                                   |
| Supercontig_1.33_MV<br>LG_03468_12sp | -818,57052 | -818,57052 | 0       | 0       | NS | 0 | 0 | 0 | 0 | 0 | 0 | 0 | 0 | 0 | hypothetical protein             | PF02260.13 | FATC(FATC domain)                                                                |
| Supercontig_1.65_MV<br>LG_05150_10sp | -286,80738 | -286,80738 | 0       | 0       | NS | 0 | 0 | 0 | 0 | 0 | 0 | 0 | 0 | 0 | hypothetical protein             | PF00153.20 | Mito_carr(Mitochondrial carrier protein)                                         |
| Supercontig_1.11_MV<br>LG_01731_7sp  | -384,4227  | -384,42261 | 0,00018 | 0       | NS | 0 | 0 | 0 | 0 | 0 | 0 | 0 | 0 | 0 | hypothetical protein             | NA         | NA                                                                               |
| Supercontig_1.45_MV<br>LG_04188_11sp | -443,36799 | -443,36799 | 0       | 0       | NS | 0 | 0 | 0 | 0 | 0 | 0 | 0 | 0 | 0 | hypothetical protein             | NA         | NA                                                                               |
| Supercontig_1.21_MV<br>LG_02643_7sp  | -1179,9221 | -1179,9221 | 0       | 0       | NS | 0 | 0 | 0 | 0 | 0 | 0 | 0 | 0 | 0 | hypothetical protein             | PF00172.11 | Zn_clus(Fungal Zn(2)-Cys(6) binuclear cluster domain)                            |

|                                       |            |            |         |         |    |   |  |  |  |  |                                 |            |                                                                                  |
|---------------------------------------|------------|------------|---------|---------|----|---|--|--|--|--|---------------------------------|------------|----------------------------------------------------------------------------------|
| Supercontig_1.14_MV<br>LG_02014_9sp   | -490,5925  | -490,59239 | 0,00022 | 0,00011 | NS | 0 |  |  |  |  | hypothetical protein            | NA         | NA                                                                               |
| Supercontig_1.8_MVL<br>G_01387_9sp    | -263,8735  | -263,8735  | 0       | 0       | NS | 0 |  |  |  |  | hypothetical protein            | PF00808.16 | CBFD_NFYB_HMF(Histone-like transcription factor (CBF/NF-Y) and archaeal histone) |
| Supercontig_1.7_MVL<br>G_01283_7sp    | -514,53346 | -514,53331 | 0,0003  | 0,00015 | NS | 0 |  |  |  |  | V-type proton ATPase subunit D  | PF01992.9  | vATP-synt_AC39(ATP synthase (C/AC39) subunit)                                    |
| Supercontig_1.42_MV<br>LG_04055_11sp  | -1390,264  | -1389,481  | 1,56588 | 0,54294 | NS | 0 |  |  |  |  | STE/STE20/YSK protein kinase    | PF07714.10 | Pkinase_Tyr(Protein tyrosine kinase)                                             |
| Supercontig_1.4_MVL<br>G_00757_6sp    | -393,95473 | -393,95473 | 0       | 0       | NS | 0 |  |  |  |  | hypothetical protein            | PF05978.9  | UNC-93(Ion channel regulatory protein UNC-93)                                    |
| Supercontig_1.74_MV<br>LG_05466_8sp   | -946,67118 | -946,21531 | 0,91174 | 0,3661  | NS | 0 |  |  |  |  | hypothetical protein            | NA         | NA                                                                               |
| Supercontig_1.6_MVL<br>G_01101_8sp    | -1026,3769 | -1023,5122 | 5,7293  | 0,943   | *  | 0 |  |  |  |  | hypothetical protein            | NA         | NA                                                                               |
| Supercontig_1.49_MV<br>LG_04445_10sp  | -1026,5447 | -1026,5447 | 0       | 0       | NS | 0 |  |  |  |  | hypothetical protein            | PF07915.6  | PRKCSH(Glucosidase II beta subunit-like protein)                                 |
| Supercontig_1.28_MV<br>LG_03200_8sp   | -322,78661 | -322,78622 | 0,00078 | 0,00039 | NS | 0 |  |  |  |  | ATP-dependent RNA helicase FAL1 | PF00270.22 | DEAD(DEAD/DEAH box helicase)                                                     |
| Supercontig_1.96_MV<br>LG_06036_10sp  | -700,11175 | -700,11175 | 0       | 0       | NS | 0 |  |  |  |  | hypothetical protein            | PF00732.12 | GMC_oxred_N(GMC oxidoreductase)                                                  |
| Supercontig_1.18_MV<br>LG_02390_7sp   | -1224,9442 | -1224,9442 | 0       | 0       | NS | 0 |  |  |  |  | hypothetical protein            | NA         | NA                                                                               |
| Supercontig_1.1_MVL<br>G_00016_10sp   | -795,61407 | -795,61366 | 0,00082 | 0,00041 | NS | 0 |  |  |  |  | hypothetical protein            | NA         | NA                                                                               |
| Supercontig_1.9_MVL<br>G_01492_8sp    | -981,62216 | -981,13035 | 0,98362 | 0,38848 | NS | 0 |  |  |  |  | hypothetical protein            | NA         | NA                                                                               |
| Supercontig_1.6_MVL<br>G_01177_9sp    | -1288,8838 | -1288,8838 | 0       | 0       | NS | 0 |  |  |  |  | hypothetical protein            | NA         | NA                                                                               |
| Supercontig_1.28_MV<br>LG_03190_6sp   | -389,16016 | -389,16013 | 0       | 0       | NS | 0 |  |  |  |  | hypothetical protein            | NA         | NA                                                                               |
| Supercontig_1.19_MV<br>LG_02445_9sp   | -535,65031 | -535,64721 | 0,0062  | 0,0031  | NS | 0 |  |  |  |  | hypothetical protein            | PF01553.14 | Acyltransferase(Acyltransferase)                                                 |
| Supercontig_1.47_MV<br>LG_04336_7sp   | -484,00976 | -484,00941 | 0,0007  | 0,00035 | NS | 0 |  |  |  |  | phosphoglycerate mutase         | PF00300.15 | PGAM(Phosphoglycerate mutase family)                                             |
| Supercontig_1.29_MV<br>LG_03211_8sp   | -503,00667 | -502,54026 | 0,93282 | 0,37275 | NS | 0 |  |  |  |  | hypothetical protein            | PF02537.8  | CRCB(CrcB-like protein)                                                          |
| Supercontig_1.33_MV<br>LG_03491_8sp   | -1253,7582 | -1253,7582 | 0       | 0       | NS | 0 |  |  |  |  | hypothetical protein            | NA         | NA                                                                               |
| Supercontig_1.19_MV<br>LG_02460_8sp   | -1086,6419 | -1085,4883 | 2,30722 | 0,6845  | NS | 0 |  |  |  |  | hypothetical protein            | NA         | NA                                                                               |
| Supercontig_1.127_MV<br>LG_06538_10sp | -342,97478 | -342,97471 | 0       | 0       | NS | 0 |  |  |  |  | hypothetical protein            | PF00106.18 | adh_short(short chain dehydrogenase)                                             |
| Supercontig_1.38_MV<br>LG_03829_10sp  | -538,07487 | -538,07486 | 0       | 0       | NS | 0 |  |  |  |  | hypothetical protein            | NA         | NA                                                                               |
| Supercontig_1.44_MV<br>LG_04159_7sp   | -701,20817 | -701,20788 | 0,00058 | 0,00029 | NS | 0 |  |  |  |  | cysteine desulfurase            | TIGR02006  | TIGR02006(IscS: cysteine desulfurase IscS)                                       |
| Supercontig_1.46_MV<br>LG_04281_8sp   | -659,98007 | -659,98001 | 0,00012 | 0       | NS | 0 |  |  |  |  | hypothetical protein            | PF02984.12 | Cyclin_C(Cyclin, C-terminal domain)                                              |
| Supercontig_1.135_MV<br>LG_06638_10sp | -1480,4118 | -1480,4118 | 0       | 0       | NS | 0 |  |  |  |  | hypothetical protein            | PF00018.21 | SH3_1(SH3 domain)                                                                |

|                                       |            |            |         |         |    |   |   |   |   |   |   |   |   |   |   |   |   |   |   |   |                                |            |                                                                             |
|---------------------------------------|------------|------------|---------|---------|----|---|---|---|---|---|---|---|---|---|---|---|---|---|---|---|--------------------------------|------------|-----------------------------------------------------------------------------|
| Supercontig_1.16_MV<br>LG_02235_8sp   | -614,52279 | -614,52279 | 0       | 0       | NS | 0 | 0 | 0 | 0 | 0 | 0 | 0 | 0 | 0 | 0 | 0 | 0 | 0 | 0 | 0 | aldehyde<br>dehydrogenase      | PF00171.15 | Aldehyd(Aldehyde dehydrogenase<br>family)                                   |
| Supercontig_1.121_MV<br>LG_06446_10sp | -875,04164 | -873,80487 | 2,47354 | 0,70968 | NS | 0 | 0 | 0 | 0 | 0 | 0 | 0 | 0 | 0 | 0 | 0 | 0 | 0 | 0 | 0 | hypothetical protein           | PF03372.16 | Exo_endo_phos(Endonuclease/<br>Exonuclease/phosphatase<br>family)           |
| Supercontig_1.30_MV<br>LG_03314_12sp  | -628,51959 | -627,70326 | 1,63266 | 0,55795 | NS | 0 | 0 | 0 | 0 | 0 | 0 | 0 | 0 | 0 | 0 | 0 | 0 | 0 | 0 | 0 | hypothetical protein           | PF01974.10 | tRNA_int_endo(tRNA intron<br>endonuclease, catalytic C-<br>terminal domain) |
| Supercontig_1.3_MVL<br>G_00489_6sp    | -547,28611 | -547,28606 | 0       | 0       | NS | 0 | 0 | 0 | 0 | 0 | 0 | 0 | 0 | 0 | 0 | 0 | 0 | 0 | 0 | 0 | hypothetical protein           | PF02230.9  | Abhydrolase_2(Phospholipase/C<br>arboxylesterase)                           |
| Supercontig_1.110_MV<br>LG_06299_11sp | -440,12631 | -440,12631 | 0       | 0       | NS | 0 | 0 | 0 | 0 | 0 | 0 | 0 | 0 | 0 | 0 | 0 | 0 | 0 | 0 | 0 | hypothetical protein           | PF00098.16 | zf-CCHC(Zinc knuckle)                                                       |
| Supercontig_1.13_MV<br>LG_01899_8sp   | -330,8856  | -330,69523 | 0,38074 | 0,17335 | NS | 0 | 0 | 0 | 0 | 0 | 0 | 0 | 0 | 0 | 0 | 0 | 0 | 0 | 0 | 0 | hypothetical protein           | NA         | NA                                                                          |
| Supercontig_1.65_MV<br>LG_05129_11sp  | -476,62986 | -476,62986 | 0       | 0       | NS | 0 | 0 | 0 | 0 | 0 | 0 | 0 | 0 | 0 | 0 | 0 | 0 | 0 | 0 | 0 | hypothetical protein           | PF12400.1  | DUF3661(Vacuolar membrane<br>protein)                                       |
| Supercontig_1.19_MV<br>LG_02459_9sp   | -325,51271 | -325,51249 | 0,00044 | 0,00022 | NS | 0 | 0 | 0 | 0 | 0 | 0 | 0 | 0 | 0 | 0 | 0 | 0 | 0 | 0 | 0 | hypothetical protein           | PF01545.14 | Cation_efflux(Cation efflux<br>family)                                      |
| Supercontig_1.196_MV<br>LG_07063_10sp | -762,43657 | -762,43657 | 0       | 0       | NS | 0 | 0 | 0 | 0 | 0 | 0 | 0 | 0 | 0 | 0 | 0 | 0 | 0 | 0 | 0 | hypothetical protein           | NA         | NA                                                                          |
| Supercontig_1.7_MVL<br>G_01276_7sp    | -633,12382 | -633,1238  | 0       | 0       | NS | 0 | 0 | 0 | 0 | 0 | 0 | 0 | 0 | 0 | 0 | 0 | 0 | 0 | 0 | 0 | hypothetical protein           | NA         | NA                                                                          |
| Supercontig_1.1_MVL<br>G_00077_11sp   | -734,74831 | -734,74831 | 0       | 0       | NS | 0 | 0 | 0 | 0 | 0 | 0 | 0 | 0 | 0 | 0 | 0 | 0 | 0 | 0 | 0 | hypothetical protein           | PF05131.7  | Pep3_Vps18(Pep3/Vps18/deep<br>orange family)                                |
| Supercontig_1.77_MV<br>LG_05549_9sp   | -453,12219 | -453,12219 | 0       | 0       | NS | 0 | 0 | 0 | 0 | 0 | 0 | 0 | 0 | 0 | 0 | 0 | 0 | 0 | 0 | 0 | hypothetical protein           | PF03583.7  | LIP(Secretory lipase)                                                       |
| Supercontig_1.26_MV<br>LG_02996_11sp  | -487,67872 | -487,67872 | 0       | 0       | NS | 0 | 0 | 0 | 0 | 0 | 0 | 0 | 0 | 0 | 0 | 0 | 0 | 0 | 0 | 0 | hypothetical protein           | PF04427.11 | Brix(Brix domain)                                                           |
| Supercontig_1.28_MV<br>LG_03168_6sp   | -824,80388 | -822,98807 | 3,63162 | 0,83729 | NS | 0 | 0 | 0 | 0 | 0 | 0 | 0 | 0 | 0 | 0 | 0 | 0 | 0 | 0 | 0 | hypothetical protein           | NA         | NA                                                                          |
| Supercontig_1.13_MV<br>LG_01907_8sp   | -630,64373 | -630,64373 | 0       | 0       | NS | 0 | 0 | 0 | 0 | 0 | 0 | 0 | 0 | 0 | 0 | 0 | 0 | 0 | 0 | 0 | hypothetical protein           | NA         | NA                                                                          |
| Supercontig_1.196_MV<br>LG_07061_9sp  | -527,86486 | -527,18148 | 1,36676 | 0,49509 | NS | 0 | 0 | 0 | 0 | 0 | 0 | 0 | 0 | 0 | 0 | 0 | 0 | 0 | 0 | 0 | hypothetical protein           | PF10294.2  | Methyltransf_16(Putative<br>methyltransferase)                              |
| Supercontig_1.35_MV<br>LG_03627_10sp  | -463,21943 | -463,17765 | 0,08356 | 0,04092 | NS | 0 | 0 | 0 | 0 | 0 | 0 | 0 | 0 | 0 | 0 | 0 | 0 | 0 | 0 | 0 | hypothetical protein           | PF00076.15 | RRM_1(RNA recognition motif.<br>(a.k.a. RRM, RBD, or RNP<br>domain))        |
| Supercontig_1.2_MVL<br>G_00301_7sp    | -494,619   | -494,61881 | 0,00038 | 0,00019 | NS | 0 | 0 | 0 | 0 | 0 | 0 | 0 | 0 | 0 | 0 | 0 | 0 | 0 | 0 | 0 | CMGC/CK2 protein<br>kinase     | PF07714.10 | Pkinase_Tyr(Protein tyrosine<br>kinase)                                     |
| Supercontig_1.4_MVL<br>G_00694_10sp   | -607,34582 | -606,58799 | 1,51566 | 0,53132 | NS | 0 | 0 | 0 | 0 | 0 | 0 | 0 | 0 | 0 | 0 | 0 | 0 | 0 | 0 | 0 | hypothetical protein           | PF00076.15 | RRM_1(RNA recognition motif.<br>(a.k.a. RRM, RBD, or RNP<br>domain))        |
| Supercontig_1.186_MV<br>LG_07030_8sp  | -458,8435  | -457,51821 | 2,65058 | 0,73427 | NS | 0 | 0 | 0 | 0 | 0 | 0 | 0 | 0 | 0 | 0 | 0 | 0 | 0 | 0 | 0 | asparaginyI-tRNA<br>synthetase | PF01336.18 | tRNA_anti(OB-fold nucleic acid<br>binding domain)                           |
| Supercontig_1.47_MV<br>LG_04316_10sp  | -332,50838 | -332,39483 | 0,2271  | 0,10734 | NS | 0 | 0 | 0 | 0 | 0 | 0 | 0 | 0 | 0 | 0 | 0 | 0 | 0 | 0 | 0 | AUR protein kinase             | PF07714.10 | Pkinase_Tyr(Protein tyrosine<br>kinase)                                     |
| Supercontig_1.33_MV<br>LG_03492_6sp   | -680,80742 | -680,80732 | 0,0002  | 0       | NS | 0 | 0 | 0 | 0 | 0 | 0 | 0 | 0 | 0 | 0 | 0 | 0 | 0 | 0 | 0 | ketol-acid<br>reductoisomerase | TIGR00465  | TIGR00465(ilvC: ketol-acid<br>reductoisomerase)                             |
| Supercontig_1.6_MVL<br>G_01153_9sp    | -290,055   | -290,055   | 0       | 0       | NS | 0 | 0 | 0 | 0 | 0 | 0 | 0 | 0 | 0 | 0 | 0 | 0 | 0 | 0 | 0 | hypothetical protein           | PF03226.7  | Yippeee(Yippeee putative zinc-<br>binding protein)                          |
| Supercontig_1.57_MV<br>LG_04827_9sp   | -321,75    | -321,75    | 0       | 0       | NS | 0 | 0 | 0 | 0 | 0 | 0 | 0 | 0 | 0 | 0 | 0 | 0 | 0 | 0 | 0 | hypothetical protein           | PF00128.17 | Alpha-amylase(Alpha amylase,<br>catalytic domain)                           |





|                                      |            |            |         |         |    |   |  |  |  |  |  |                              |            |                                                                  |
|--------------------------------------|------------|------------|---------|---------|----|---|--|--|--|--|--|------------------------------|------------|------------------------------------------------------------------|
| Supercontig_1.4_MVL<br>G_00855_9sp   | -1019,1824 | -1019,1824 | 0       | 0       | NS | 0 |  |  |  |  |  | gamma-glutamyltranspeptidase | PF01019.14 | G_glu_transpept(Gamma-glutamyltranspeptidase)                    |
| Supercontig_1.80_MV<br>LG_05654_8sp  | -433,71196 | -433,69501 | 0,0339  | 0,01681 | NS | 0 |  |  |  |  |  | hypothetical protein         | PF02566.12 | OsmC(OsmC-like protein)                                          |
| Supercontig_1.32_MV<br>LG_03434_8sp  | -1060,3192 | -1060,3192 | 0       | 0       | NS | 0 |  |  |  |  |  | hypothetical protein         | PF07910.6  | Peptidase_C78(Peptidase family C78)                              |
| Supercontig_1.1_MVL<br>G_00238_9sp   | -473,32842 | -473,07977 | 0,4973  | 0,22015 | NS | 0 |  |  |  |  |  | hypothetical protein         | PF05648.7  | PEX11(Peroxisomal biogenesis factor 11 (PEX11))                  |
| Supercontig_1.52_MV<br>LG_04567_10sp | -313,11258 | -313,07664 | 0,07188 | 0,0353  | NS | 0 |  |  |  |  |  | hypothetical protein         | PF10282.2  | Muc_lac_enz(3-carboxy-cis,cis-muconate lactonizing enzyme)       |
| Supercontig_1.1_MVL<br>G_00161_9sp   | -395,58551 | -395,5626  | 0,04582 | 0,02265 | NS | 0 |  |  |  |  |  | hypothetical protein         | PF00085.13 | Thioredoxin(Thioredoxin)                                         |
| Supercontig_1.6_MVL<br>G_01164_9sp   | -952,89815 | -952,71158 | 0,37314 | 0,1702  | NS | 0 |  |  |  |  |  | hypothetical protein         | PF00076.15 | RRM_1(RNA recognition motif. (a.k.a. RRM, RBD, or RNP domain))   |
| Supercontig_1.15_MV<br>LG_02068_7sp  | -379,16266 | -379,16266 | 0       | 0       | NS | 0 |  |  |  |  |  | hypothetical protein         | PF07690.9  | MFS_1(Major Facilitator Superfamily)                             |
| Supercontig_1.14_MV<br>LG_01980_8sp  | -912,62472 | -912,58479 | 0,07986 | 0,03914 | NS | 0 |  |  |  |  |  | hypothetical protein         | PF01545.14 | Cation_efflux(Cation efflux family)                              |
| Supercontig_1.9_MVL<br>G_01569_6sp   | -766,8659  | -766,21186 | 1,30808 | 0,48006 | NS | 0 |  |  |  |  |  | hypothetical protein         | PF04140.7  | ICMT(Isoprenylcysteine carboxyl methyltransferase (ICMT) family) |
| Supercontig_1.6_MVL<br>G_01126_11sp  | -385,10074 | -384,85445 | 0,49258 | 0,2183  | NS | 0 |  |  |  |  |  | hypothetical protein         | PF08614.4  | ATG16(Autophagy protein 16 (ATG16))                              |
| Supercontig_1.5_MVL<br>G_01028_7sp   | -395,53474 | -395,45649 | 0,1565  | 0,07527 | NS | 0 |  |  |  |  |  | hypothetical protein         | PF04434.10 | SWIM(SWIM zinc finger)                                           |
| Supercontig_1.69_MV<br>LG_05289_11sp | -390,94668 | -390,94668 | 0       | 0       | NS | 0 |  |  |  |  |  | hypothetical protein         | PF01212.14 | Beta_elim_lyase(Beta-eliminating lyase)                          |
| Supercontig_1.95_MV<br>LG_06018_11sp | -406,68666 | -406,68654 | 0,00024 | 0,00012 | NS | 0 |  |  |  |  |  | hypothetical protein         | NA         | NA                                                               |
| Supercontig_1.49_MV<br>LG_04439_11sp | -436,57003 | -436,32332 | 0,49342 | 0,21863 | NS | 0 |  |  |  |  |  | hypothetical protein         | NA         | NA                                                               |
| Supercontig_1.39_MV<br>LG_03843_10sp | -714,51991 | -714,28586 | 0,4681  | 0,20868 | NS | 0 |  |  |  |  |  | hypothetical protein         | TIGR00952  | TIGR00952(S15_bact: ribosomal protein S15)                       |
| Supercontig_1.3_MVL<br>G_00502_9sp   | -579,88064 | -578,42497 | 2,91134 | 0,76676 | NS | 0 |  |  |  |  |  | hypothetical protein         | PF04912.7  | Dynamitin(Dynamitin)                                             |
| Supercontig_1.42_MV<br>LG_04071_6sp  | -823,77636 | -823,69107 | 0,17058 | 0,08175 | NS | 0 |  |  |  |  |  | hypothetical protein         | PF05502.6  | Dynactin_p62(Dynactin p62 family)                                |
| Supercontig_1.36_MV<br>LG_03679_8sp  | -484,75305 | -483,5563  | 2,3935  | 0,69783 | NS | 0 |  |  |  |  |  | hypothetical protein         | NA         | NA                                                               |
| Supercontig_1.24_MV<br>LG_02909_8sp  | -1353,0325 | -1353,0325 | 0       | 0       | NS | 0 |  |  |  |  |  | hypothetical protein         | NA         | NA                                                               |
| Supercontig_1.10_MV<br>LG_01592_8sp  | -877,51937 | -877,51854 | 0,00166 | 0,00083 | NS | 0 |  |  |  |  |  | hypothetical protein         | NA         | NA                                                               |
| Supercontig_1.13_MV<br>LG_01942_9sp  | -606,48701 | -606,48691 | 0,0002  | 0       | NS | 0 |  |  |  |  |  | hypothetical protein         | PF00096.19 | zf-C2H2(Zinc finger, C2H2 type)                                  |
| Supercontig_1.6_MVL<br>G_01194_8sp   | -658,69801 | -657,04071 | 3,3146  | 0,80935 | NS | 0 |  |  |  |  |  | hypothetical protein         | NA         | NA                                                               |
| Supercontig_1.53_MV<br>LG_04626_10sp | -494,52364 | -494,52364 | 0       | 0       | NS | 0 |  |  |  |  |  | hypothetical protein         | TIGR02765  | TIGR02765(crypto_DASH: cryptochrome, DASH family)                |

|                                       |            |            |         |         |    |   |  |  |  |  |                                            |            |                                                                   |
|---------------------------------------|------------|------------|---------|---------|----|---|--|--|--|--|--------------------------------------------|------------|-------------------------------------------------------------------|
| Supercontig_1.69_MV<br>LG_05283_9sp   | -908,54651 | -905,79736 | 5,4983  | 0,93602 | *  | 0 |  |  |  |  | hypothetical protein                       | PF01408.15 | GFO_IDH_MocA(Oxidoreductase family, NAD-binding Rossmann fold)    |
| Supercontig_1.10_MV<br>LG_01589_7sp   | -1173,9866 | -1173,8903 | 0,1927  | 0,09185 | NS | 0 |  |  |  |  | hypothetical protein                       | PF04130.6  | Spc97_Spc98(Spc97 / Spc98 family)                                 |
| Supercontig_1.54_MV<br>LG_04674_6sp   | -1267,29   | -1266,0565 | 2,46682 | 0,7087  | NS | 0 |  |  |  |  | hypothetical protein                       | NA         | NA                                                                |
| Supercontig_1.6_MVL<br>G_01190_7sp    | -784,78543 | -784,78543 | 0       | 0       | NS | 0 |  |  |  |  | hypothetical protein                       | PF08216.4  | DUF1716(Eukaryotic domain of unknown function (DUF1716))          |
| Supercontig_1.3_MVL<br>G_00563_10sp   | -317,03122 | -316,48462 | 1,0932  | 0,42109 | NS | 0 |  |  |  |  | hypothetical protein                       | PF01459.15 | Porin_3(Eukaryotic porin)                                         |
| Supercontig_1.3_MVL<br>G_00659_7sp    | -360,68697 | -360,68697 | 0       | 0       | NS | 0 |  |  |  |  | hypothetical protein                       | PF02777.11 | Sod_Fe_C(iron/manganese superoxide dismutases, C-terminal domain) |
| Supercontig_1.53_MV<br>LG_04602_9sp   | -468,34053 | -468,21485 | 0,25136 | 0,1181  | NS | 0 |  |  |  |  | hypothetical protein                       | PF00642.17 | zf-CCCH(Zinc finger C-x8-C-x5-C-x3-H type (and similar))          |
| Supercontig_1.125_MV<br>LG_06501_10sp | -767,72495 | -767,45178 | 0,54634 | 0,23904 | NS | 0 |  |  |  |  | hypothetical protein                       | NA         | NA                                                                |
| Supercontig_1.60_MV<br>LG_04952_7sp   | -399,21214 | -398,78709 | 0,8501  | 0,34626 | NS | 0 |  |  |  |  | hypothetical protein                       | NA         | NA                                                                |
| Supercontig_1.47_MV<br>LG_04328_9sp   | -346,76023 | -346,08188 | 1,3567  | 0,49255 | NS | 0 |  |  |  |  | hypothetical protein                       | PF00397.19 | WW(WW domain)                                                     |
| Supercontig_1.1_MVL<br>G_00075_10sp   | -449,74682 | -449,74682 | 0       | 0       | NS | 0 |  |  |  |  | DNA-directed RNA polymerase I subunit RPA2 | PF06883.5  | RNA_poI_Rpa2_4(RNA polymerase I, Rpa2 specific domain)            |
| Supercontig_1.5_MVL<br>G_01013_7sp    | -620,67781 | -620,67781 | 0       | 0       | NS | 0 |  |  |  |  | acyl-CoA dehydrogenase                     | PF02770.12 | Acyl-CoA_dh_M(Acyl-CoA dehydrogenase, middle domain)              |
| Supercontig_1.27_MV<br>LG_03086_10sp  | -380,13466 | -380,13438 | 0,00056 | 0,00028 | NS | 0 |  |  |  |  | 26S protease regulatory subunit 4          | PF07724.7  | AAA_2(AAA domain (Cdc48 subfamily))                               |
| Supercontig_1.9_MVL<br>G_01538_10sp   | -596,37624 | -596,37624 | 0       | 0       | NS | 0 |  |  |  |  | hypothetical protein                       | NA         | NA                                                                |
| Supercontig_1.54_MV<br>LG_04667_10sp  | -333,18018 | -333,18    | 0,00036 | 0,00018 | NS | 0 |  |  |  |  | hypothetical protein                       | NA         | NA                                                                |
| Supercontig_1.8_MVL<br>G_01359_9sp    | -505,09554 | -504,59547 | 1,00014 | 0,39351 | NS | 0 |  |  |  |  | hypothetical protein                       | PF00551.12 | Formyl_trans_N(Formyl transferase)                                |
| Supercontig_1.20_MV<br>LG_02603_8sp   | -444,94063 | -444,94058 | 0       | 0       | NS | 0 |  |  |  |  | hypothetical protein                       | NA         | NA                                                                |
| Supercontig_1.204_MV<br>LG_07103_10sp | -358,76654 | -358,76618 | 0       | 0       | NS | 0 |  |  |  |  | hypothetical protein                       | PF02466.12 | Tim17(Tim17/Tim22/Tim23 family)                                   |
| Supercontig_1.95_MV<br>LG_06008_8sp   | -2416,8722 | -2416,8722 | 0       | 0       | NS | 0 |  |  |  |  | hypothetical protein                       | PF02891.13 | zf-MIZ(MIZ/SP-RING zinc finger)                                   |
| Supercontig_1.9_MVL<br>G_01484_9sp    | -854,76752 | -854,7675  | 0       | 0       | NS | 0 |  |  |  |  | hypothetical protein                       | PF00009.20 | GTP_EFTU(Elongation factor Tu GTP binding domain)                 |
| Supercontig_1.83_MV<br>LG_05728_7sp   | -329,98929 | -329,98929 | 0       | 0       | NS | 0 |  |  |  |  | hypothetical protein                       | PF00704.21 | Glyco_hydro_18(Glycosyl hydrolases family 18)                     |
| Supercontig_1.20_MV<br>LG_02579_12sp  | -482,48425 | -482,4842  | 0       | 0       | NS | 0 |  |  |  |  | hypothetical protein                       | NA         | NA                                                                |
| Supercontig_1.7_MVL<br>G_01248_6sp    | -544,36202 | -544,36202 | 0       | 0       | NS | 0 |  |  |  |  | histone                                    | PF00125.17 | Histone(Core histone H2A/H2B/H3/H4)                               |

|                                      |            |            |         |         |    |   |   |   |   |   |                                              |            |                                                                    |
|--------------------------------------|------------|------------|---------|---------|----|---|---|---|---|---|----------------------------------------------|------------|--------------------------------------------------------------------|
| Supercontig_1.41_MV<br>LG_04006_10sp | -340,03564 | -340,03561 | 0       | 0       | NS | 0 | □ | □ | □ | □ | maf-like protein                             | PF02545.7  | Maf(Maf-like protein)                                              |
| Supercontig_1.15_MV<br>LG_02096_8sp  | -627,95677 | -627,85974 | 0,19406 | 0,09247 | NS | 0 | □ | □ | □ | □ | hypothetical protein                         | PF02919.8  | Topoisom_I_N(Eukaryotic DNA topoisomerase I, DNA binding fragment) |
| Supercontig_1.10_MV<br>LG_01675_9sp  | -679,87636 | -678,34407 | 3,06458 | 0,78396 | NS | 0 | □ | □ | □ | □ | acetolactate synthase<br>I/III small subunit | PF10369.2  | ALS_ss_C(Small subunit of acetolactate synthase)                   |
| Supercontig_1.1_MVL<br>G_00001_10sp  | -1093,0945 | -1093,0941 | 0,00078 | 0,00039 | NS | 0 | □ | □ | □ | □ | pyruvate carboxylase                         | PF02222.15 | ATP-grasp(ATP-grasp domain)                                        |
| Supercontig_1.1_MVL<br>G_00225_9sp   | -630,94484 | -630,94484 | 0       | 0       | NS | 0 | □ | □ | □ | □ | hypothetical protein                         | PF00698.14 | Acyl_transf_1(Acyl transferase domain)                             |
| Supercontig_1.1_MVL<br>G_00240_11sp  | -269,85143 | -269,85129 | 0,00028 | 0,00014 | NS | 0 | □ | □ | □ | □ | hypothetical protein                         | PF04049.6  | APC8(Anaphase promoting complex subunit 8 / Cdc23)                 |
| Supercontig_1.39_MV<br>LG_03901_9sp  | -732,88111 | -732,88107 | 0       | 0       | NS | 0 | □ | □ | □ | □ | hypothetical protein                         | PF02421.11 | FeoB_N(Ferrous iron transport protein B)                           |
| Supercontig_1.85_MV<br>LG_05798_9sp  | -649,99037 | -649,99037 | 0       | 0       | NS | 0 | □ | □ | □ | □ | hypothetical protein                         | PF06741.6  | LsmAD(LsmAD domain)                                                |
| Supercontig_1.33_MV<br>LG_03477_9sp  | -449,09573 | -449,09561 | 0,00024 | 0,00012 | NS | 0 | □ | □ | □ | □ | hypothetical protein                         | PF00728.15 | Glyco_hydro_20(Glycosyl hydrolase family 20, catalytic domain)     |
| Supercontig_1.33_MV<br>LG_03445_7sp  | -577,19297 | -575,88825 | 2,60944 | 0,72875 | NS | 0 | □ | □ | □ | □ | hypothetical protein                         | PF00023.23 | Ank(Ankyrin repeat)                                                |
| Supercontig_1.58_MV<br>LG_04859_11sp | -393,10096 | -393,10096 | 0       | 0       | NS | 0 | □ | □ | □ | □ | hypothetical protein                         | PF01344.18 | Kelch_1(Kelch motif)                                               |
| Supercontig_1.70_MV<br>LG_05321_6sp  | -649,98697 | -649,90336 | 0,16722 | 0,08021 | NS | 0 | □ | □ | □ | □ | hypothetical protein                         | TIGR00001  | TIGR00001(rpmI_bact: ribosomal protein L35)                        |
| Supercontig_1.61_MV<br>LG_04969_6sp  | -493,42865 | -493,42865 | 0       | 0       | NS | 0 | □ | □ | □ | □ | hypothetical protein                         | PF09696.3  | Ctf8(Ctf8)                                                         |
| Supercontig_1.1_MVL<br>G_00250_10sp  | -471,78484 | -471,78484 | 0       | 0       | NS | 0 | □ | □ | □ | □ | hypothetical protein                         | NA         | NA                                                                 |
| Supercontig_1.98_MV<br>LG_06100_7sp  | -608,71175 | -608,71156 | 0,00038 | 0,00019 | NS | 0 | □ | □ | □ | □ | hypothetical protein                         | PF00076.15 | RRM_1(RNA recognition motif. (a.k.a. RRM, RBD, or RNP domain))     |
| Supercontig_1.112_MV<br>LG_06318_7sp | -645,26224 | -645,17445 | 0,17558 | 0,08405 | NS | 0 | □ | □ | □ | □ | hypothetical protein                         | NA         | NA                                                                 |
| Supercontig_1.82_MV<br>LG_05705_10sp | -383,56777 | -383,56777 | 0       | 0       | NS | 0 | □ | □ | □ | □ | hypothetical protein                         | PF01398.14 | Mov34(Mov34/MPN/PAD-1 family)                                      |
| Supercontig_1.23_MV<br>LG_02815_8sp  | -675,60276 | -675,60253 | 0,00046 | 0,00023 | NS | 0 | □ | □ | □ | □ | hypothetical protein                         | NA         | NA                                                                 |
| Supercontig_1.3_MVL<br>G_00655_8sp   | -373,91487 | -373,79376 | 0,24222 | 0,11406 | NS | 0 | □ | □ | □ | □ | hypothetical protein                         | PF05603.5  | DUF775(Protein of unknown function (DUF775))                       |
| Supercontig_1.13_MV<br>LG_01910_9sp  | -365,40251 | -365,40244 | 0       | 0       | NS | 0 | □ | □ | □ | □ | chorismate synthase                          | TIGR00033  | TIGR00033(aroC: chorismate synthase)                               |
| Supercontig_1.5_MVL<br>G_00958_9sp   | -386,54838 | -386,54837 | 0       | 0       | NS | 0 | □ | □ | □ | □ | hypothetical protein                         | NA         | NA                                                                 |
| Supercontig_1.79_MV<br>LG_05627_11sp | -640,31606 | -640,29145 | 0,04922 | 0,02431 | NS | 0 | □ | □ | □ | □ | hypothetical protein                         | PF00096.19 | zf-C2H2(Zinc finger, C2H2 type)                                    |
| Supercontig_1.3_MVL<br>G_00626_7sp   | -917,77553 | -917,76934 | 0,01238 | 0,00617 | NS | 0 | □ | □ | □ | □ | branched-chain amino acid aminotransferase   | PF01063.12 | Aminotran_4(Aminotransferase class IV)                             |



|                                       |            |            |         |         |    |   |   |   |   |   |                                                                      |            |                                                          |
|---------------------------------------|------------|------------|---------|---------|----|---|---|---|---|---|----------------------------------------------------------------------|------------|----------------------------------------------------------|
| Supercontig_1.6_MVL<br>G_01221_9sp    | -639,26413 | -639,26413 | 0       | 0       | NS | 0 | □ | □ | □ | □ | succinyl-CoA ligase<br>[GDP-forming] subunit<br>beta, hydrogenosomal | PF00549.12 | Ligase_CoA(CoA-ligase)                                   |
| Supercontig_1.47_MV<br>LG_04341_9sp   | -607,93916 | -607,93916 | 0       | 0       | NS | 0 | □ | □ | □ | □ | hypothetical protein                                                 | PF03097.11 | BRO1(BRO1-like domain)                                   |
| Supercontig_1.5_MVL<br>G_00978_10sp   | -373,5159  | -373,51582 | 0,00016 | 0       | NS | 0 | □ | □ | □ | □ | hypothetical protein                                                 | PF00172.11 | Zn_clus(Fungal Zn(2)-Cys(6)<br>binuclear cluster domain) |
| Supercontig_1.10_MV<br>LG_01605_12sp  | -544,418   | -544,34033 | 0,15534 | 0,07473 | NS | 0 | □ | □ | □ | □ | hypothetical protein                                                 | PF00899.14 | ThiF(ThiF family)                                        |
| Supercontig_1.30_MV<br>LG_03318_6sp   | -785,62985 | -784,91683 | 1,42604 | 0,50984 | NS | 0 | □ | □ | □ | □ | hypothetical protein                                                 | PF00892.13 | EamA(EamA-like transporter<br>family)                    |
| Supercontig_1.12_MV<br>LG_01809_11sp  | -607,84938 | -606,52536 | 2,64804 | 0,73394 | NS | 0 | □ | □ | □ | □ | hypothetical protein                                                 | TIGR00071  | TIGR00071(hisT_truA: tRNA<br>pseudouridine synthase A)   |
| Supercontig_1.2_MVL<br>G_00363_10sp   | -493,94086 | -492,91275 | 2,05622 | 0,64232 | NS | 0 | □ | □ | □ | □ | hypothetical protein                                                 | NA         | NA                                                       |
| Supercontig_1.6_MVL<br>G_01188_11sp   | -444,07471 | -444,07456 | 0,0003  | 0,00015 | NS | 0 | □ | □ | □ | □ | hypothetical protein                                                 | PF00867.11 | XPG_I(XPG I-region)                                      |
| Supercontig_1.239_MV<br>LG_07202_8sp  | -434,77117 | -434,48554 | 0,57126 | 0,24846 | NS | 0 | □ | □ | □ | □ | hypothetical protein                                                 | PF02798.13 | GST_N(Glutathione S-<br>transferase, N-terminal domain)  |
| Supercontig_1.9_MVL<br>G_01512_7sp    | -577,27806 | -577,25942 | 0,03728 | 0,01847 | NS | 0 | □ | □ | □ | □ | MC family<br>mitochondrial carrier<br>protein                        | PF00153.20 | Mito_carr(Mitochondrial carrier<br>protein)              |
| Supercontig_1.7_MVL<br>G_01355_7sp    | -528,47493 | -528,02732 | 0,89522 | 0,36085 | NS | 0 | □ | □ | □ | □ | hypothetical protein                                                 | PF01459.15 | Porin_3(Eukaryotic porin)                                |
| Supercontig_1.26_MV<br>LG_03055_7sp   | -697,12312 | -697,12312 | 0       | 0       | NS | 0 | □ | □ | □ | □ | hypothetical protein                                                 | NA         | NA                                                       |
| Supercontig_1.13_MV<br>LG_01921_7sp   | -975,84849 | -972,46294 | 6,7711  | 0,96614 | ** | 0 | □ | □ | □ | □ | hypothetical protein                                                 | PF00010.19 | HLH(Helix-loop-helix DNA-<br>binding domain)             |
| Supercontig_1.44_MV<br>LG_04164_9sp   | -483,01493 | -483,01493 | 0       | 0       | NS | 0 | □ | □ | □ | □ | hypothetical protein                                                 | PF01150.10 | GDA1_CD39(GDA1/CD39<br>(nucleoside phosphatase) family)  |
| Supercontig_1.2_MVL<br>G_00482_8sp    | -700,71528 | -700,69393 | 0,0427  | 0,02112 | NS | 0 | □ | □ | □ | □ | hypothetical protein                                                 | NA         | NA                                                       |
| Supercontig_1.6_MVL<br>G_01049_12sp   | -594,52162 | -594,52162 | 0       | 0       | NS | 0 | □ | □ | □ | □ | hypothetical protein                                                 | NA         | NA                                                       |
| Supercontig_1.45_MV<br>LG_04186_8sp   | -465,04818 | -465,04761 | 0,00114 | 0,00057 | NS | 0 | □ | □ | □ | □ | hypothetical protein                                                 | PF04777.6  | Evr1_Alr(Erv1 / Alr family)                              |
| Supercontig_1.24_MV<br>LG_02838_8sp   | -465,49648 | -465,49648 | 0       | 0       | NS | 0 | □ | □ | □ | □ | 3-oxoacyl-[acyl-carrier<br>protein] reductase                        | PF00106.18 | adh_short(short chain<br>dehydrogenase)                  |
| Supercontig_1.117_MV<br>LG_06388_11sp | -601,13269 | -601,13269 | 0       | 0       | NS | 0 | □ | □ | □ | □ | hypothetical protein                                                 | NA         | NA                                                       |
| Supercontig_1.6_MVL<br>G_01092_7sp    | -770,09994 | -770,09969 | 0,0005  | 0,00025 | NS | 0 | □ | □ | □ | □ | vesicle-fusing ATPase                                                | PF07724.7  | AAA_2(AAA domain (Cdc48<br>subfamily))                   |
| Supercontig_1.55_MV<br>LG_04707_9sp   | -463,05233 | -463,05233 | 0       | 0       | NS | 0 | □ | □ | □ | □ | hypothetical protein                                                 | PF01070.11 | FMN_dh(FMN-dependent<br>dehydrogenase)                   |
| Supercontig_1.67_MV<br>LG_05223_6sp   | -466,9119  | -466,91137 | 0,00106 | 0,00053 | NS | 0 | □ | □ | □ | □ | CMGC/CK2 protein<br>kinase                                           | PF07714.10 | Pkinase_Tyr(Protein tyrosine<br>kinase)                  |
| Supercontig_1.126_MV<br>LG_06522_10sp | -1135,8191 | -1135,2766 | 1,085   | 0,41871 | NS | 0 | □ | □ | □ | □ | hypothetical protein                                                 | PF00675.13 | Peptidase_M16(Insulinase<br>(Peptidase family M16))      |

|                                       |            |            |         |         |    |   |  |  |  |  |                                              |            |                                                                      |
|---------------------------------------|------------|------------|---------|---------|----|---|--|--|--|--|----------------------------------------------|------------|----------------------------------------------------------------------|
| Supercontig_1.53_MV<br>LG_04624_11sp  | -701,11649 | -701,11649 | 0       | 0       | NS | 0 |  |  |  |  | hypothetical protein                         | PF04006.5  | Mpp10(Mpp10 protein)                                                 |
| Supercontig_1.2_MVL<br>G_00476_11sp   | -478,05669 | -478,05669 | 0       | 0       | NS | 0 |  |  |  |  | hypothetical protein                         | PF03051.8  | Peptidase_C1_2(Peptidase C1-<br>like family)                         |
| Supercontig_1.99_MV<br>LG_06108_9sp   | -328,93038 | -328,68583 | 0,4891  | 0,21694 | NS | 0 |  |  |  |  | hypothetical protein                         | PF08271.5  | TF_Zn_Ribbon(TFIB zinc-<br>binding)                                  |
| Supercontig_1.1_MVL<br>G_00274_10sp   | -835,53849 | -835,53792 | 0,00114 | 0,00057 | NS | 0 |  |  |  |  | hypothetical protein                         | PF01569.14 | PAP2(PAP2 superfamily)                                               |
| Supercontig_1.39_MV<br>LG_03902_6sp   | -289,2749  | -289,27484 | 0,00012 | 0       | NS | 0 |  |  |  |  | hypothetical protein                         | NA         | NA                                                                   |
| Supercontig_1.150_MV<br>LG_06777_8sp  | -730,86932 | -730,86921 | 0,00022 | 0,00011 | NS | 0 |  |  |  |  | hypothetical protein                         | PF00782.13 | DSPc(Dual specificity<br>phosphatase, catalytic domain)              |
| Supercontig_1.13_MV<br>LG_01901_7sp   | -613,58824 | -613,58823 | 0       | 0       | NS | 0 |  |  |  |  | hypothetical protein                         | PF02636.10 | DUF185(Uncharacterized ACR,<br>COG1565)                              |
| Supercontig_1.34_MV<br>LG_03518_7sp   | -372,16097 | -371,91055 | 0,50084 | 0,22153 | NS | 0 |  |  |  |  | hypothetical protein                         | PF00293.21 | NUDIX(NUDIX domain)                                                  |
| Supercontig_1.24_MV<br>LG_02895_7sp   | -1292,6807 | -1292,6807 | 0       | 0       | NS | 0 |  |  |  |  | hypothetical protein                         | NA         | NA                                                                   |
| Supercontig_1.26_MV<br>LG_03036_10sp  | -604,02854 | -604,02852 | 0       | 0       | NS | 0 |  |  |  |  | hypothetical protein                         | PF02269.9  | TFIID-18kDa(Transcription<br>initiation factor IID, 18kD subunit)    |
| Supercontig_1.3_MVL<br>G_00594_10sp   | -581,283   | -581,283   | 0       | 0       | NS | 0 |  |  |  |  | hypothetical protein                         | PF04938.5  | SIP1(Survival motor neuron<br>(SMN) interacting protein 1<br>(SIP1)) |
| Supercontig_1.62_MV<br>LG_05020_6sp   | -1035,8654 | -1035,8187 | 0,09334 | 0,0456  | NS | 0 |  |  |  |  | hypothetical protein                         | PF00786.21 | PBD(P21-Rho-binding domain)                                          |
| Supercontig_1.70_MV<br>LG_05339_10sp  | -419,51533 | -419,51533 | 0       | 0       | NS | 0 |  |  |  |  | hypothetical protein                         | PF07767.4  | Nop53(Nop53 (60S ribosomal<br>biogenesis))                           |
| Supercontig_1.5_MVL<br>G_01044_10sp   | -595,81138 | -595,81138 | 0       | 0       | NS | 0 |  |  |  |  | hypothetical protein                         | NA         | NA                                                                   |
| Supercontig_1.32_MV<br>LG_03435_8sp   | -406,76166 | -406,76151 | 0,0003  | 0,00015 | NS | 0 |  |  |  |  | hypothetical protein                         | PF02144.9  | Rad1(Repair protein<br>Rad1/Rec1/Rad17)                              |
| Supercontig_1.52_MV<br>LG_04592_12sp  | -797,67519 | -797,67502 | 0,00034 | 0,00017 | NS | 0 |  |  |  |  | hypothetical protein                         | PF03104.12 | DNA_pol_B_exo(DNA<br>polymerase family B,<br>exonuclease domain)     |
| Supercontig_1.91_MV<br>LG_05937_10sp  | -1600,7993 | -1600,7904 | 0,01778 | 0,00885 | NS | 0 |  |  |  |  | hypothetical protein                         | PF00650.13 | CRAL_TRIO(CRAL/TRIO<br>domain)                                       |
| Supercontig_1.197_MV<br>LG_07071_10sp | -843,01611 | -842,49964 | 1,03294 | 0,40338 | NS | 0 |  |  |  |  | hypothetical protein                         | PF12152.1  | eIF_4G1(Eukaryotic translation<br>initiation factor 4G1)             |
| Supercontig_1.39_MV<br>LG_03892_10sp  | -589,21868 | -588,79792 | 0,84152 | 0,34345 | NS | 0 |  |  |  |  | hypothetical protein                         | NA         | NA                                                                   |
| Supercontig_1.121_MV<br>LG_06440_11sp | -464,68768 | -464,4874  | 0,40056 | 0,1815  | NS | 0 |  |  |  |  | hypothetical protein                         | PF07738.6  | Sad1_UNC(Sad1 / UNC-like C-<br>terminal)                             |
| Supercontig_1.36_MV<br>LG_03653_8sp   | -465,03818 | -464,01496 | 2,04644 | 0,64056 | NS | 0 |  |  |  |  | phosphoglycerate<br>kinase                   | PF00162.12 | PGK(Phosphoglycerate kinase)                                         |
| Supercontig_1.107_MV<br>LG_06243_12sp | -453,45885 | -453,45885 | 0       | 0       | NS | 0 |  |  |  |  | hypothetical protein                         | PF00515.21 | TPR_1(Tetratricopeptide repeat)                                      |
| Supercontig_1.125_MV<br>LG_06508_8sp  | -724,04749 | -724,04728 | 0,00042 | 0,00021 | NS | 0 |  |  |  |  | 19S proteasome<br>regulatory subunit<br>Rpn6 | PF01399.20 | PCI(PCI domain)                                                      |

|                                       |            |            |         |         |    |   |   |   |   |   |   |   |   |   |                                |            |                                                                      |
|---------------------------------------|------------|------------|---------|---------|----|---|---|---|---|---|---|---|---|---|--------------------------------|------------|----------------------------------------------------------------------|
| Supercontig_1.19_MV<br>LG_02458_10sp  | -708,39714 | -708,39714 | 0       | 0       | NS | 0 | 0 | 0 | 0 | 0 | 0 | 0 | 0 | 0 | hypothetical protein           | PF06687.5  | SUR7(SUR7/Pall family)                                               |
| Supercontig_1.46_MV<br>LG_04276_8sp   | -709,56383 | -709,56383 | 0       | 0       | NS | 0 | 0 | 0 | 0 | 0 | 0 | 0 | 0 | 0 | hypothetical protein           | PF07859.6  | Abhydrolase_3(alpha/beta<br>hydrolase fold)                          |
| Supercontig_1.22_MV<br>LG_02718_10sp  | -702,70577 | -702,42069 | 0,57016 | 0,24805 | NS | 0 | 0 | 0 | 0 | 0 | 0 | 0 | 0 | 0 | hypothetical protein           | PF07717.9  | DUF1605(Domain of unknown<br>function (DUF1605))                     |
| Supercontig_1.53_MV<br>LG_04617_10sp  | -373,2413  | -373,24116 | 0,00028 | 0,00014 | NS | 0 | 0 | 0 | 0 | 0 | 0 | 0 | 0 | 0 | hypothetical protein           | PF08242.5  | Methyltransf_12(Methyltransferase<br>domain)                         |
| Supercontig_1.113_MV<br>LG_06341_6sp  | -760,81583 | -760,81583 | 0       | 0       | NS | 0 | 0 | 0 | 0 | 0 | 0 | 0 | 0 | 0 | GDP-mannose 4,6<br>dehydratase | TIGR01472  | TIGR01472(gmd: GDP-mannose<br>4,6-dehydratase)                       |
| Supercontig_1.66_MV<br>LG_05195_7sp   | -942,38092 | -941,90688 | 0,94808 | 0,37752 | NS | 0 | 0 | 0 | 0 | 0 | 0 | 0 | 0 | 0 | hypothetical protein           | PF04502.6  | DUF572(Family of unknown<br>function (DUF572))                       |
| Supercontig_1.58_MV<br>LG_04868_9sp   | -457,53539 | -457,16791 | 0,73496 | 0,30752 | NS | 0 | 0 | 0 | 0 | 0 | 0 | 0 | 0 | 0 | hypothetical protein           | PF06687.5  | SUR7(SUR7/Pall family)                                               |
| Supercontig_1.2_MVL<br>G_00408_11sp   | -441,88904 | -440,21356 | 3,35096 | 0,81278 | NS | 0 | 0 | 0 | 0 | 0 | 0 | 0 | 0 | 0 | hypothetical protein           | NA         | NA                                                                   |
| Supercontig_1.80_MV<br>LG_05651_8sp   | -561,87582 | -561,87573 | 0,00018 | 0       | NS | 0 | 0 | 0 | 0 | 0 | 0 | 0 | 0 | 0 | hypothetical protein           | NA         | NA                                                                   |
| Supercontig_1.42_MV<br>LG_04087_11sp  | -657,32095 | -656,56991 | 1,50208 | 0,52812 | NS | 0 | 0 | 0 | 0 | 0 | 0 | 0 | 0 | 0 | hypothetical protein           | PF00443.22 | UCH(Ubiquitin carboxyl-terminal<br>hydrolase)                        |
| Supercontig_1.3_MVL<br>G_00670_10sp   | -707,97836 | -707,84974 | 0,25724 | 0,12069 | NS | 0 | 0 | 0 | 0 | 0 | 0 | 0 | 0 | 0 | hypothetical protein           | PF07732.8  | Cu-oxidase_3(Multicopper<br>oxidase)                                 |
| Supercontig_1.85_MV<br>LG_05815_9sp   | -494,98402 | -494,98402 | 0       | 0       | NS | 0 | 0 | 0 | 0 | 0 | 0 | 0 | 0 | 0 | hypothetical protein           | PF00010.19 | HLH(Helix-loop-helix DNA-<br>binding domain)                         |
| Supercontig_1.24_MV<br>LG_02897_8sp   | -609,74408 | -609,7002  | 0,08776 | 0,04293 | NS | 0 | 0 | 0 | 0 | 0 | 0 | 0 | 0 | 0 | hypothetical protein           | NA         | NA                                                                   |
| Supercontig_1.54_MV<br>LG_04664_10sp  | -682,31149 | -682,31128 | 0,00042 | 0,00021 | NS | 0 | 0 | 0 | 0 | 0 | 0 | 0 | 0 | 0 | hypothetical protein           | PF07728.7  | AAA_5(AAA domain (dynein-<br>related subfamily))                     |
| Supercontig_1.4_MVL<br>G_00762_9sp    | -427,41143 | -427,41109 | 0,00068 | 0,00034 | NS | 0 | 0 | 0 | 0 | 0 | 0 | 0 | 0 | 0 | HAL protein kinase             | PF07714.10 | Pkinase_Tyr(Protein tyrosine<br>kinase)                              |
| Supercontig_1.40_MV<br>LG_03948_10sp  | -527,95879 | -527,95879 | 0       | 0       | NS | 0 | 0 | 0 | 0 | 0 | 0 | 0 | 0 | 0 | hypothetical protein           | PF06398.4  | Pex24p(Integral peroxisomal<br>membrane peroxin)                     |
| Supercontig_1.96_MV<br>LG_06042_6sp   | -888,54998 | -888,54998 | 0       | 0       | NS | 0 | 0 | 0 | 0 | 0 | 0 | 0 | 0 | 0 | hypothetical protein           | NA         | NA                                                                   |
| Supercontig_1.2_MVL<br>G_00481_9sp    | -737,35705 | -737,35469 | 0,00472 | 0,00236 | NS | 0 | 0 | 0 | 0 | 0 | 0 | 0 | 0 | 0 | hypothetical protein           | PF10557.2  | Cullin_Nedd8(Cullin protein<br>neddylation domain)                   |
| Supercontig_1.52_MV<br>LG_04562_11sp  | -417,49866 | -417,49866 | 0       | 0       | NS | 0 | 0 | 0 | 0 | 0 | 0 | 0 | 0 | 0 | hypothetical protein           | NA         | NA                                                                   |
| Supercontig_1.69_MV<br>LG_05290_10sp  | -634,88379 | -634,88379 | 0       | 0       | NS | 0 | 0 | 0 | 0 | 0 | 0 | 0 | 0 | 0 | hypothetical protein           | PF01103.16 | Bac_surface_Ag(Surface<br>antigen)                                   |
| Supercontig_1.35_MV<br>LG_03602_6sp   | -526,47673 | -525,68621 | 1,58104 | 0,54639 | NS | 0 | 0 | 0 | 0 | 0 | 0 | 0 | 0 | 0 | asparaginyl-tRNA<br>synthetase | PF01336.18 | tRNA_anti(OB-fold nucleic acid<br>binding domain)                    |
| Supercontig_1.49_MV<br>LG_04433_9sp   | -503,97688 | -503,97688 | 0       | 0       | NS | 0 | 0 | 0 | 0 | 0 | 0 | 0 | 0 | 0 | hypothetical protein           | PF00097.18 | zf-C3HC4(Zinc finger, C3HC4<br>type (RING finger))                   |
| Supercontig_1.10_MV<br>LG_01613_6sp   | -318,75911 | -318,75903 | 0,00016 | 0       | NS | 0 | 0 | 0 | 0 | 0 | 0 | 0 | 0 | 0 | hypothetical protein           | PF00076.15 | RRM_1(RNA recognition motif.<br>(a.k.a. RRM, RBD, or RNP<br>domain)) |
| Supercontig_1.55_MV<br>LG_04728_6sp   | -746,96106 | -746,7435  | 0,43512 | 0,19552 | NS | 0 | 0 | 0 | 0 | 0 | 0 | 0 | 0 | 0 | hypothetical protein           | PF00583.17 | Acetyltransf_1(Acetyltransferase<br>(GNAT) family)                   |
| Supercontig_1.124_MV<br>LG_06487_11sp | -462,14901 | -461,93891 | 0,4202  | 0,1895  | NS | 0 | 0 | 0 | 0 | 0 | 0 | 0 | 0 | 0 | hypothetical protein           | TIGR01740  | TIGR01740(pyrF: orotidine 5'-<br>phosphate decarboxylase)            |



|                                       |            |            |         |         |    |   |   |   |   |   |   |   |   |   |   |   |   |   |   |   |                                          |            |                                                            |
|---------------------------------------|------------|------------|---------|---------|----|---|---|---|---|---|---|---|---|---|---|---|---|---|---|---|------------------------------------------|------------|------------------------------------------------------------|
| Supercontig_1.6_MVL<br>G_01061_10sp   | -945,21429 | -945,21429 | 0       | 0       | NS | 0 | 0 | 0 | 0 | 0 | 0 | 0 | 0 | 0 | 0 | 0 | 0 | 0 | 0 | 0 | hypothetical protein                     | NA         | NA                                                         |
| Supercontig_1.12_MV<br>LG_01839_8sp   | -687,17534 | -687,03204 | 0,2866  | 0,13351 | NS | 0 | 0 | 0 | 0 | 0 | 0 | 0 | 0 | 0 | 0 | 0 | 0 | 0 | 0 | 0 | hypothetical protein                     | PF00018.21 | SH3_1(SH3 domain)                                          |
| Supercontig_1.53_MV<br>LG_04603_7sp   | -452,65921 | -452,65916 | 0       | 0       | NS | 0 | 0 | 0 | 0 | 0 | 0 | 0 | 0 | 0 | 0 | 0 | 0 | 0 | 0 | 0 | hypothetical protein                     | PF00307.24 | CH(Calponin homology (CH) domain)                          |
| Supercontig_1.53_MV<br>LG_04636_8sp   | -298,9228  | -298,92245 | 0,0007  | 0,00035 | NS | 0 | 0 | 0 | 0 | 0 | 0 | 0 | 0 | 0 | 0 | 0 | 0 | 0 | 0 | 0 | mannose-1-phosphate<br>guanyltransferase | PF00132.17 | Hexapep(Bacterial transferase hexapeptide (three repeats)) |
| Supercontig_1.3_MVL<br>G_00537_7sp    | -435,80358 | -435,80358 | 0       | 0       | NS | 0 | 0 | 0 | 0 | 0 | 0 | 0 | 0 | 0 | 0 | 0 | 0 | 0 | 0 | 0 | rRNA-processing<br>protein FCF1          | PF04900.5  | Fcf1(Fcf1)                                                 |
| Supercontig_1.66_MV<br>LG_05178_9sp   | -428,4767  | -428,47661 | 0,00018 | 0       | NS | 0 | 0 | 0 | 0 | 0 | 0 | 0 | 0 | 0 | 0 | 0 | 0 | 0 | 0 | 0 | hypothetical protein                     | NA         | NA                                                         |
| Supercontig_1.39_MV<br>LG_03853_6sp   | -947,08346 | -947,00782 | 0,15128 | 0,07285 | NS | 0 | 0 | 0 | 0 | 0 | 0 | 0 | 0 | 0 | 0 | 0 | 0 | 0 | 0 | 0 | hypothetical protein                     | NA         | NA                                                         |
| Supercontig_1.6_MVL<br>G_01125_8sp    | -528,80203 | -528,80171 | 0,00064 | 0,00032 | NS | 0 | 0 | 0 | 0 | 0 | 0 | 0 | 0 | 0 | 0 | 0 | 0 | 0 | 0 | 0 | homoaconitase                            | PF00694.12 | Aconitase_C(Aconitase C-terminal domain)                   |
| Supercontig_1.4_MVL<br>G_00751_11sp   | -632,19866 | -632,06821 | 0,2609  | 0,1223  | NS | 0 | 0 | 0 | 0 | 0 | 0 | 0 | 0 | 0 | 0 | 0 | 0 | 0 | 0 | 0 | glycogen<br>phosphorylase 1              | PF00343.13 | Phosphorylase(Carbohydrate phosphorylase)                  |
| Supercontig_1.47_MV<br>LG_04318_12sp  | -797,7738  | -797,25502 | 1,03756 | 0,40475 | NS | 0 | 0 | 0 | 0 | 0 | 0 | 0 | 0 | 0 | 0 | 0 | 0 | 0 | 0 | 0 | hypothetical protein                     | NA         | NA                                                         |
| Supercontig_1.24_MV<br>LG_02893_10sp  | -535,25451 | -535,25388 | 0,00126 | 0,00063 | NS | 0 | 0 | 0 | 0 | 0 | 0 | 0 | 0 | 0 | 0 | 0 | 0 | 0 | 0 | 0 | actin-like protein 2                     | PF00022.12 | Actin(Actin)                                               |
| Supercontig_1.20_MV<br>LG_02554_10sp  | -1284,9622 | -1284,9622 | 0       | 0       | NS | 0 | 0 | 0 | 0 | 0 | 0 | 0 | 0 | 0 | 0 | 0 | 0 | 0 | 0 | 0 | hypothetical protein                     | TIGR00606  | TIGR00606(rad50: rad50)                                    |
| Supercontig_1.1_MVL<br>G_00215_9sp    | -379,21346 | -378,2822  | 1,86252 | 0,60594 | NS | 0 | 0 | 0 | 0 | 0 | 0 | 0 | 0 | 0 | 0 | 0 | 0 | 0 | 0 | 0 | hypothetical protein                     | PF00153.20 | Mito_carr(Mitochondrial carrier protein)                   |
| Supercontig_1.46_MV<br>LG_04290_8sp   | -816,37858 | -815,76588 | 1,2254  | 0,45811 | NS | 0 | 0 | 0 | 0 | 0 | 0 | 0 | 0 | 0 | 0 | 0 | 0 | 0 | 0 | 0 | hypothetical protein                     | PF05132.7  | RNA_pol_Rpc4(RNA polymerase III RPC4)                      |
| Supercontig_1.8_MVL<br>G_01358_8sp    | -1535,2735 | -1534,5806 | 1,38588 | 0,4999  | NS | 0 | 0 | 0 | 0 | 0 | 0 | 0 | 0 | 0 | 0 | 0 | 0 | 0 | 0 | 0 | protoporphyrinogen<br>oxidase            | TIGR00562  | TIGR00562(proto_IX_ox: protoporphyrinogen oxidase)         |
| Supercontig_1.7_MVL<br>G_01345_10sp   | -641,74687 | -641,74447 | 0,0048  | 0,0024  | NS | 0 | 0 | 0 | 0 | 0 | 0 | 0 | 0 | 0 | 0 | 0 | 0 | 0 | 0 | 0 | hypothetical protein                     | NA         | NA                                                         |
| Supercontig_1.164_MV<br>LG_06893_8sp  | -472,46237 | -472,46033 | 0,00408 | 0,00204 | NS | 0 | 0 | 0 | 0 | 0 | 0 | 0 | 0 | 0 | 0 | 0 | 0 | 0 | 0 | 0 | hypothetical protein                     | PF06047.4  | SynMuv_product(Ras-induced vulval development antagonist)  |
| Supercontig_1.1_MVL<br>G_00269_8sp    | -846,62343 | -846,62343 | 0       | 0       | NS | 0 | 0 | 0 | 0 | 0 | 0 | 0 | 0 | 0 | 0 | 0 | 0 | 0 | 0 | 0 | hypothetical protein                     | PF00172.11 | Zn_clus(Fungal Zn(2)-Cys(6) binuclear cluster domain)      |
| Supercontig_1.20_MV<br>LG_02529_9sp   | -450,18756 | -450,17954 | 0,01604 | 0,00799 | NS | 0 | 0 | 0 | 0 | 0 | 0 | 0 | 0 | 0 | 0 | 0 | 0 | 0 | 0 | 0 | hypothetical protein                     | PF10173.2  | DUF2343(Uncharacterised conserved protein (DUF2343))       |
| Supercontig_1.13_MV<br>LG_01932_8sp   | -413,48762 | -413,48754 | 0,00016 | 0       | NS | 0 | 0 | 0 | 0 | 0 | 0 | 0 | 0 | 0 | 0 | 0 | 0 | 0 | 0 | 0 | hypothetical protein                     | PF08210.4  | APOBEC_N(APOBEC-like N-terminal domain)                    |
| Supercontig_1.57_MV<br>LG_04828_12sp  | -1221,7697 | -1221,7697 | 0       | 0       | NS | 0 | 0 | 0 | 0 | 0 | 0 | 0 | 0 | 0 | 0 | 0 | 0 | 0 | 0 | 0 | hypothetical protein                     | PF00623.13 | RNA_pol_Rpb1_2(RNA polymerase Rpb1, domain 2)              |
| Supercontig_1.126_MV<br>LG_06519_10sp | -928,1325  | -928,06543 | 0,13414 | 0,06487 | NS | 0 | 0 | 0 | 0 | 0 | 0 | 0 | 0 | 0 | 0 | 0 | 0 | 0 | 0 | 0 | hypothetical protein                     | NA         | NA                                                         |
| Supercontig_1.23_MV<br>LG_02826_7sp   | -538,58669 | -538,58669 | 0       | 0       | NS | 0 | 0 | 0 | 0 | 0 | 0 | 0 | 0 | 0 | 0 | 0 | 0 | 0 | 0 | 0 | hypothetical protein                     | PF07819.6  | PGAP1(PGAP1-like protein)                                  |
| Supercontig_1.19_MV<br>LG_02507_8sp   | -917,64791 | -917,59413 | 0,10756 | 0,05236 | NS | 0 | 0 | 0 | 0 | 0 | 0 | 0 | 0 | 0 | 0 | 0 | 0 | 0 | 0 | 0 | hypothetical protein                     | PF10405.2  | BHD_3(Rad4 beta-hairpin domain 3)                          |

|                                      |            |            |         |         |    |   |   |   |   |   |   |   |   |   |   |   |   |   |   |   |                                   |            |                                                         |
|--------------------------------------|------------|------------|---------|---------|----|---|---|---|---|---|---|---|---|---|---|---|---|---|---|---|-----------------------------------|------------|---------------------------------------------------------|
| Supercontig_1.127_MV<br>LG_06537_6sp | -1174,8424 | -1174,8424 | 0       | 0       | NS | 0 | 0 | 0 | 0 | 0 | 0 | 0 | 0 | 0 | 0 | 0 | 0 | 0 | 0 | 0 | hypothetical protein              | PF00181.16 | Ribosomal_L2(Ribosomal Proteins L2, RNA binding domain) |
| Supercontig_1.111_MV<br>LG_06307_8sp | -477,80606 | -477,80606 | 0       | 0       | NS | 0 | 0 | 0 | 0 | 0 | 0 | 0 | 0 | 0 | 0 | 0 | 0 | 0 | 0 | 0 | hypothetical protein              | PF03435.11 | Saccharop_dh(Saccharopine dehydrogenase)                |
| Supercontig_1.29_MV<br>LG_03254_8sp  | -837,37326 | -837,37316 | 0,0002  | 0       | NS | 0 | 0 | 0 | 0 | 0 | 0 | 0 | 0 | 0 | 0 | 0 | 0 | 0 | 0 | 0 | hypothetical protein              | PF03031.11 | NIF(NLI interacting factor-like phosphatase)            |
| Supercontig_1.107_MV<br>LG_06259_6sp | -949,54712 | -948,71791 | 1,65842 | 0,56361 | NS | 0 | 0 | 0 | 0 | 0 | 0 | 0 | 0 | 0 | 0 | 0 | 0 | 0 | 0 | 0 | hypothetical protein              | PF03810.12 | IBN_N(Importin-beta N-terminal domain)                  |
| Supercontig_1.35_MV<br>LG_03589_9sp  | -644,37248 | -644,37248 | 0       | 0       | NS | 0 | 0 | 0 | 0 | 0 | 0 | 0 | 0 | 0 | 0 | 0 | 0 | 0 | 0 | 0 | hypothetical protein              | PF03388.6  | Lectin_leg-like(Legume-like lectin family)              |
| Supercontig_1.6_MVL<br>G_01093_10sp  | -806,2749  | -806,2749  | 0       | 0       | NS | 0 | 0 | 0 | 0 | 0 | 0 | 0 | 0 | 0 | 0 | 0 | 0 | 0 | 0 | 0 | hypothetical protein              | PF00787.17 | PX(PX domain)                                           |
| Supercontig_1.41_MV<br>LG_04028_7sp  | -1090,6933 | -1090,6933 | 0       | 0       | NS | 0 | 0 | 0 | 0 | 0 | 0 | 0 | 0 | 0 | 0 | 0 | 0 | 0 | 0 | 0 | hypothetical protein              | NA         | NA                                                      |
| Supercontig_1.1_MVL<br>G_00051_8sp   | -1577,9656 | -1577,3902 | 1,1508  | 0,43752 | NS | 0 | 0 | 0 | 0 | 0 | 0 | 0 | 0 | 0 | 0 | 0 | 0 | 0 | 0 | 0 | hypothetical protein              | PF04802.8  | SMK-1(Component of IIS longevity pathway SMK-1)         |
| Supercontig_1.39_MV<br>LG_03888_7sp  | -627,76604 | -627,15331 | 1,22546 | 0,45813 | NS | 0 | 0 | 0 | 0 | 0 | 0 | 0 | 0 | 0 | 0 | 0 | 0 | 0 | 0 | 0 | hypothetical protein              | NA         | NA                                                      |
| Supercontig_1.14_MV<br>LG_02003_7sp  | -614,60582 | -614,60582 | 0       | 0       | NS | 0 | 0 | 0 | 0 | 0 | 0 | 0 | 0 | 0 | 0 | 0 | 0 | 0 | 0 | 0 | hypothetical protein              | PF02581.10 | TMP-TENI(Thiamine monophosphate synthase/TENI)          |
| Supercontig_1.151_MV<br>LG_06785_9sp | -427,05547 | -426,90206 | 0,30682 | 0,14222 | NS | 0 | 0 | 0 | 0 | 0 | 0 | 0 | 0 | 0 | 0 | 0 | 0 | 0 | 0 | 0 | hypothetical protein              | NA         | NA                                                      |
| Supercontig_1.57_MV<br>LG_04819_8sp  | -790,25297 | -790,25297 | 0       | 0       | NS | 0 | 0 | 0 | 0 | 0 | 0 | 0 | 0 | 0 | 0 | 0 | 0 | 0 | 0 | 0 | hypothetical protein              | PF00535.19 | Glycos_transf_2(Glycosyl transferase family 2)          |
| Supercontig_1.11_MV<br>LG_01705_10sp | -829,46736 | -829,46736 | 0       | 0       | NS | 0 | 0 | 0 | 0 | 0 | 0 | 0 | 0 | 0 | 0 | 0 | 0 | 0 | 0 | 0 | hypothetical protein              | PF02854.12 | MIF4G(MIF4G domain)                                     |
| Supercontig_1.18_MV<br>LG_02428_11sp | -391,99074 | -391,99072 | 0       | 0       | NS | 0 | 0 | 0 | 0 | 0 | 0 | 0 | 0 | 0 | 0 | 0 | 0 | 0 | 0 | 0 | hypothetical protein              | TIGR01266  | TIGR01266(fum_ac_acetase: fumarylacetoacetase)          |
| Supercontig_1.3_MVL<br>G_00591_9sp   | -466,88957 | -466,39713 | 0,98488 | 0,38887 | NS | 0 | 0 | 0 | 0 | 0 | 0 | 0 | 0 | 0 | 0 | 0 | 0 | 0 | 0 | 0 | hypothetical protein              | NA         | NA                                                      |
| Supercontig_1.44_MV<br>LG_04144_9sp  | -485,86206 | -485,86197 | 0,00018 | 0       | NS | 0 | 0 | 0 | 0 | 0 | 0 | 0 | 0 | 0 | 0 | 0 | 0 | 0 | 0 | 0 | hypothetical protein              | NA         | NA                                                      |
| Supercontig_1.2_MVL<br>G_00293_6sp   | -395,10957 | -395,10957 | 0       | 0       | NS | 0 | 0 | 0 | 0 | 0 | 0 | 0 | 0 | 0 | 0 | 0 | 0 | 0 | 0 | 0 | hypothetical protein              | PF01472.13 | PUA(PUA domain)                                         |
| Supercontig_1.17_MV<br>LG_02320_9sp  | -756,11665 | -756,11647 | 0,00036 | 0,00018 | NS | 0 | 0 | 0 | 0 | 0 | 0 | 0 | 0 | 0 | 0 | 0 | 0 | 0 | 0 | 0 | alanine-glyoxylate transaminase   | PF00266.12 | Aminotran_5(Aminotransferase class-V)                   |
| Supercontig_1.58_MV<br>LG_04848_12sp | -544,02905 | -544,02905 | 0       | 0       | NS | 0 | 0 | 0 | 0 | 0 | 0 | 0 | 0 | 0 | 0 | 0 | 0 | 0 | 0 | 0 | hypothetical protein              | PF04675.7  | DNA_ligase_A_N(DNA ligase N terminus)                   |
| Supercontig_1.85_MV<br>LG_05802_8sp  | -616,78652 | -616,78652 | 0       | 0       | NS | 0 | 0 | 0 | 0 | 0 | 0 | 0 | 0 | 0 | 0 | 0 | 0 | 0 | 0 | 0 | hypothetical protein              | PF00999.14 | Na_H_Exchange(Sodium/hydrogen exchanger family)         |
| Supercontig_1.50_MV<br>LG_04457_7sp  | -610,67132 | -610,67097 | 0,0007  | 0,00035 | NS | 0 | 0 | 0 | 0 | 0 | 0 | 0 | 0 | 0 | 0 | 0 | 0 | 0 | 0 | 0 | hypothetical protein              | PF03114.11 | BAR(BAR domain)                                         |
| Supercontig_1.39_MV<br>LG_03882_11sp | -463,88196 | -463,88171 | 0,0005  | 0,00025 | NS | 0 | 0 | 0 | 0 | 0 | 0 | 0 | 0 | 0 | 0 | 0 | 0 | 0 | 0 | 0 | hypothetical protein              | PF04921.7  | XAP5(XAP5 protein)                                      |
| Supercontig_1.70_MV<br>LG_05320_11sp | -867,1451  | -867,1247  | 0,0408  | 0,02019 | NS | 0 | 0 | 0 | 0 | 0 | 0 | 0 | 0 | 0 | 0 | 0 | 0 | 0 | 0 | 0 | hypothetical protein              | TIGR00378  | TIGR00378(cax: calcium/proton exchanger)                |
| Supercontig_1.36_MV<br>LG_03672_10sp | -312,05253 | -312,05248 | 0       | 0       | NS | 0 | 0 | 0 | 0 | 0 | 0 | 0 | 0 | 0 | 0 | 0 | 0 | 0 | 0 | 0 | hypothetical protein              | PF03800.7  | Nuf2(Nuf2 family)                                       |
| Supercontig_1.18_MV<br>LG_02380_8sp  | -1272,0973 | -1272,0973 | 0       | 0       | NS | 0 | 0 | 0 | 0 | 0 | 0 | 0 | 0 | 0 | 0 | 0 | 0 | 0 | 0 | 0 | AAT family amino acid transporter | TIGR00913  | TIGR00913(2A0310: amino acid permease (yeast))          |

|                                      |            |            |         |         |    |   |   |   |   |   |   |   |   |   |   |   |   |   |   |   |                                              |            |                                                                   |
|--------------------------------------|------------|------------|---------|---------|----|---|---|---|---|---|---|---|---|---|---|---|---|---|---|---|----------------------------------------------|------------|-------------------------------------------------------------------|
| Supercontig_1.99_MV<br>LG_06112_12sp | -879,63826 | -879,63826 | 0       | 0       | NS | 0 | 0 | 0 | 0 | 0 | 0 | 0 | 0 | 0 | 0 | 0 | 0 | 0 | 0 | 0 | hypothetical protein                         | PF00225.16 | Kinesin(Kinesin motor domain)                                     |
| Supercontig_1.4_MVL<br>G_00765_10sp  | -905,87215 | -905,67054 | 0,40322 | 0,18259 | NS | 0 | 0 | 0 | 0 | 0 | 0 | 0 | 0 | 0 | 0 | 0 | 0 | 0 | 0 | 0 | hypothetical protein                         | NA         | NA                                                                |
| Supercontig_1.30_MV<br>LG_03310_8sp  | -907,15621 | -906,39304 | 1,52634 | 0,53381 | NS | 0 | 0 | 0 | 0 | 0 | 0 | 0 | 0 | 0 | 0 | 0 | 0 | 0 | 0 | 0 | hypothetical protein                         | PF02204.11 | VPS9(Vacuolar sorting protein 9 (VPS9) domain)                    |
| Supercontig_1.49_MV<br>LG_04406_9sp  | -1233,2132 | -1232,0992 | 2,22796 | 0,67175 | NS | 0 | 0 | 0 | 0 | 0 | 0 | 0 | 0 | 0 | 0 | 0 | 0 | 0 | 0 | 0 | hypothetical protein                         | PF03568.10 | Peptidase_C50(Peptidase family C50)                               |
| Supercontig_1.40_MV<br>LG_03932_9sp  | -921,85252 | -921,40989 | 0,88526 | 0,35766 | NS | 0 | 0 | 0 | 0 | 0 | 0 | 0 | 0 | 0 | 0 | 0 | 0 | 0 | 0 | 0 | hypothetical protein                         | TIGR00813  | TIGR00813(sss: transporter, solute:sodium symporter (SSS) family) |
| Supercontig_1.49_MV<br>LG_04443_7sp  | -580,96543 | -580,71164 | 0,50758 | 0,22415 | NS | 0 | 0 | 0 | 0 | 0 | 0 | 0 | 0 | 0 | 0 | 0 | 0 | 0 | 0 | 0 | hypothetical protein                         | NA         | NA                                                                |
| Supercontig_1.57_MV<br>LG_04821_10sp | -442,49673 | -442,49662 | 0,00022 | 0,00011 | NS | 0 | 0 | 0 | 0 | 0 | 0 | 0 | 0 | 0 | 0 | 0 | 0 | 0 | 0 | 0 | hypothetical protein                         | PF07859.6  | Abhydrolase_3(alpha/beta hydrolase fold)                          |
| Supercontig_1.50_MV<br>LG_04493_7sp  | -357,2461  | -357,24603 | 0,00014 | 0       | NS | 0 | 0 | 0 | 0 | 0 | 0 | 0 | 0 | 0 | 0 | 0 | 0 | 0 | 0 | 0 | hypothetical protein                         | PF00023.23 | Ank(Ankyrin repeat)                                               |
| Supercontig_1.34_MV<br>LG_03569_8sp  | -729,65446 | -729,65432 | 0,00028 | 0,00014 | NS | 0 | 0 | 0 | 0 | 0 | 0 | 0 | 0 | 0 | 0 | 0 | 0 | 0 | 0 | 0 | hypothetical protein                         | PF00628.22 | PHD(PHD-finger)                                                   |
| Supercontig_1.2_MVL<br>G_00400_7sp   | -667,08096 | -667,08082 | 0,00028 | 0,00014 | NS | 0 | 0 | 0 | 0 | 0 | 0 | 0 | 0 | 0 | 0 | 0 | 0 | 0 | 0 | 0 | hypothetical protein                         | PF08234.5  | Spindle_Spc25(Chromosome segregation protein Spc25)               |
| Supercontig_1.53_MV<br>LG_04601_9sp  | -1157,39   | -1157,3317 | 0,11674 | 0,0567  | NS | 0 | 0 | 0 | 0 | 0 | 0 | 0 | 0 | 0 | 0 | 0 | 0 | 0 | 0 | 0 | hypothetical protein                         | NA         | NA                                                                |
| Supercontig_1.23_MV<br>LG_02795_10sp | -568,23238 | -566,24898 | 3,9668  | 0,8624  | NS | 0 | 0 | 0 | 0 | 0 | 0 | 0 | 0 | 0 | 0 | 0 | 0 | 0 | 0 | 0 | hypothetical protein                         | NA         | NA                                                                |
| Supercontig_1.32_MV<br>LG_03414_10sp | -670,89615 | -670,89615 | 0       | 0       | NS | 0 | 0 | 0 | 0 | 0 | 0 | 0 | 0 | 0 | 0 | 0 | 0 | 0 | 0 | 0 | ATP-binding cassette, sub-family F, member 3 | PF00005.20 | ABC_tran(ABC transporter)                                         |
| Supercontig_1.32_MV<br>LG_03396_8sp  | -462,68034 | -462,51045 | 0,33978 | 0,15624 | NS | 0 | 0 | 0 | 0 | 0 | 0 | 0 | 0 | 0 | 0 | 0 | 0 | 0 | 0 | 0 | hypothetical protein                         | NA         | NA                                                                |
| Supercontig_1.14_MV<br>LG_02037_6sp  | -743,65993 | -743,65961 | 0,00064 | 0,00032 | NS | 0 | 0 | 0 | 0 | 0 | 0 | 0 | 0 | 0 | 0 | 0 | 0 | 0 | 0 | 0 | hypothetical protein                         | PF05653.7  | DUF803(Protein of unknown function (DUF803))                      |
| Supercontig_1.20_MV<br>LG_02594_8sp  | -951,1949  | -951,19488 | 0       | 0       | NS | 0 | 0 | 0 | 0 | 0 | 0 | 0 | 0 | 0 | 0 | 0 | 0 | 0 | 0 | 0 | hypothetical protein                         | NA         | NA                                                                |
| Supercontig_1.34_MV<br>LG_03523_9sp  | -337,69597 | -337,69577 | 0,0004  | 0,0002  | NS | 0 | 0 | 0 | 0 | 0 | 0 | 0 | 0 | 0 | 0 | 0 | 0 | 0 | 0 | 0 | hypothetical protein                         | PF00134.16 | Cyclin_N(Cyclin, N-terminal domain)                               |
| Supercontig_1.21_MV<br>LG_02669_10sp | -602,15076 | -602,15067 | 0,00018 | 0       | NS | 0 | 0 | 0 | 0 | 0 | 0 | 0 | 0 | 0 | 0 | 0 | 0 | 0 | 0 | 0 | hypothetical protein                         | PF00566.11 | TBC(TBC domain)                                                   |
| Supercontig_1.62_MV<br>LG_05007_9sp  | -750,23601 | -750,23046 | 0,0111  | 0,00553 | NS | 0 | 0 | 0 | 0 | 0 | 0 | 0 | 0 | 0 | 0 | 0 | 0 | 0 | 0 | 0 | hypothetical protein                         | PF00782.13 | DSPc(Dual specificity phosphatase, catalytic domain)              |
| Supercontig_1.23_MV<br>LG_02821_10sp | -394,16498 | -392,71553 | 2,8989  | 0,7653  | NS | 0 | 0 | 0 | 0 | 0 | 0 | 0 | 0 | 0 | 0 | 0 | 0 | 0 | 0 | 0 | hypothetical protein                         | NA         | NA                                                                |
| Supercontig_1.124_MV<br>LG_06483_8sp | -572,48353 | -571,00329 | 2,96048 | 0,77242 | NS | 0 | 0 | 0 | 0 | 0 | 0 | 0 | 0 | 0 | 0 | 0 | 0 | 0 | 0 | 0 | hypothetical protein                         | PF00364.15 | Biotin_lipoyl(Biotin-requiring enzyme)                            |
| Supercontig_1.10_MV<br>LG_01628_7sp  | -763,17471 | -762,90448 | 0,54046 | 0,2368  | NS | 0 | 0 | 0 | 0 | 0 | 0 | 0 | 0 | 0 | 0 | 0 | 0 | 0 | 0 | 0 | hypothetical protein                         | PF00928.14 | Adap_comp_sub(Adaptor complexes medium subunit family)            |
| Supercontig_1.1_MVL<br>G_00160_10sp  | -400,16336 | -400,1633  | 0,00012 | 0       | NS | 0 | 0 | 0 | 0 | 0 | 0 | 0 | 0 | 0 | 0 | 0 | 0 | 0 | 0 | 0 | hypothetical protein                         | PF04719.7  | TAFII28(hTAFII28-like protein conserved region)                   |

|                                       |            |            |         |         |    |   |   |   |   |   |                                              |            |                                                                                 |
|---------------------------------------|------------|------------|---------|---------|----|---|---|---|---|---|----------------------------------------------|------------|---------------------------------------------------------------------------------|
| Supercontig_1.10_MV<br>LG_01679_7sp   | -889,72634 | -889,72634 | 0       | 0       | NS | 0 | 0 | 0 | 0 | 0 | phosphoglucumutase                           | PF02880.9  | PGM_PMM_III(Phosphoglucumutase/phosphomannomutase, alpha/beta/alpha domain III) |
| Supercontig_1.19_MV<br>LG_02435_8sp   | -546,78548 | -546,78548 | 0       | 0       | NS | 0 | 0 | 0 | 0 | 0 | ribose-phosphate pyrophosphokinase           | TIGR01251  | TIGR01251(ribP_PPkin: ribose-phosphate diphosphokinase)                         |
| Supercontig_1.38_MV<br>LG_03770_7sp   | -776,38163 | -776,38063 | 0,002   | 0,001   | NS | 0 | 0 | 0 | 0 | 0 | ATP-binding cassette, sub-family F, member 2 | PF00005.20 | ABC_tran(ABC transporter)                                                       |
| Supercontig_1.24_MV<br>LG_02866_7sp   | -543,52093 | -543,52087 | 0,00012 | 0       | NS | 0 | 0 | 0 | 0 | 0 | hypothetical protein                         | NA         | NA                                                                              |
| Supercontig_1.38_MV<br>LG_03801_10sp  | -434,48831 | -434,48831 | 0       | 0       | NS | 0 | 0 | 0 | 0 | 0 | hypothetical protein                         | PF01743.13 | PolyA_pol(Poly A polymerase head domain)                                        |
| Supercontig_1.18_MV<br>LG_02402_11sp  | -703,61375 | -703,61375 | 0       | 0       | NS | 0 | 0 | 0 | 0 | 0 | hypothetical protein                         | PF01699.17 | Na_Ca_ex(Sodium/calcium exchanger protein)                                      |
| Supercontig_1.3_MVL<br>G_00501_8sp    | -642,13525 | -641,89513 | 0,48024 | 0,21347 | NS | 0 | 0 | 0 | 0 | 0 | hypothetical protein                         | NA         | NA                                                                              |
| Supercontig_1.104_MV<br>LG_06210_10sp | -379,50862 | -379,15042 | 0,7164  | 0,30107 | NS | 0 | 0 | 0 | 0 | 0 | hypothetical protein                         | NA         | NA                                                                              |
| Supercontig_1.28_MV<br>LG_03152_10sp  | -390,64379 | -388,91408 | 3,45942 | 0,82266 | NS | 0 | 0 | 0 | 0 | 0 | hypothetical protein                         | NA         | NA                                                                              |
| Supercontig_1.1_MVL<br>G_00034_12sp   | -673,88855 | -673,88835 | 0,0004  | 0,0002  | NS | 0 | 0 | 0 | 0 | 0 | hypothetical protein                         | PF04389.10 | Peptidase_M28(Peptidase family M28)                                             |
| Supercontig_1.23_MV<br>LG_02812_7sp   | -1873,017  | -1873,017  | 0       | 0       | NS | 0 | 0 | 0 | 0 | 0 | hypothetical protein                         | PF01369.13 | Sec7(Sec7 domain)                                                               |
| Supercontig_1.39_MV<br>LG_03889_8sp   | -599,55543 | -598,2282  | 2,65446 | 0,73479 | NS | 0 | 0 | 0 | 0 | 0 | hypothetical protein                         | NA         | NA                                                                              |
| Supercontig_1.1_MVL<br>G_00136_10sp   | -796,35563 | -796,35194 | 0,00738 | 0,00368 | NS | 0 | 0 | 0 | 0 | 0 | hypothetical protein                         | PF02518.19 | HATPase_c(Histidine kinase-, DNA gyrase B-, and HSP90-like ATPase)              |
| Supercontig_1.28_MV<br>LG_03157_8sp   | -1179,5181 | -1179,0179 | 1,0003  | 0,39356 | NS | 0 | 0 | 0 | 0 | 0 | hypothetical protein                         | PF00293.21 | NUDIX(NUDIX domain)                                                             |
| Supercontig_1.51_MV<br>LG_04518_10sp  | -545,76022 | -545,66001 | 0,20042 | 0,09535 | NS | 0 | 0 | 0 | 0 | 0 | hypothetical protein                         | PF07993.5  | NAD_binding_4(Male sterility protein)                                           |
| Supercontig_1.117_MV<br>LG_06400_11sp | -415,71951 | -415,48074 | 0,47754 | 0,2124  | NS | 0 | 0 | 0 | 0 | 0 | prephenate dehydrogenase (NADP+)             | PF03446.8  | NAD_binding_2(NAD binding domain of 6-phosphogluconate dehydrogenase)           |
| Supercontig_1.5_MVL<br>G_00915_11sp   | -535,20285 | -535,20285 | 0       | 0       | NS | 0 | 0 | 0 | 0 | 0 | AGC/AKT protein kinase                       | PF07714.10 | Pkinase_Tyr(Protein tyrosine kinase)                                            |
| Supercontig_1.74_MV<br>LG_05453_7sp   | -578,34976 | -578,34967 | 0,00018 | 0       | NS | 0 | 0 | 0 | 0 | 0 | hypothetical protein                         | PF07855.5  | DUF1649(Protein of unknown function (DUF1649))                                  |
| Supercontig_1.14_MV<br>LG_02047_10sp  | -1236,1895 | -1236,1837 | 0,01162 | 0,00579 | NS | 0 | 0 | 0 | 0 | 0 | hypothetical protein                         | PF00899.14 | ThiF(ThiF family)                                                               |
| Supercontig_1.23_MV<br>LG_02804_10sp  | -1144,0885 | -1143,8813 | 0,41436 | 0,18713 | NS | 0 | 0 | 0 | 0 | 0 | hypothetical protein                         | PF04376.6  | ATE_N(Arginine-tRNA-protein transferase, N terminus)                            |
| Supercontig_1.7_MVL<br>G_01240_10sp   | -657,6287  | -657,58025 | 0,0969  | 0,0473  | NS | 0 | 0 | 0 | 0 | 0 | hypothetical protein                         | NA         | NA                                                                              |
| Supercontig_1.8_MVL<br>G_01414_9sp    | -444,57907 | -443,07878 | 3,00058 | 0,77693 | NS | 0 | 0 | 0 | 0 | 0 | hypothetical protein                         | PF00752.10 | XPG_N(XPG N-terminal domain)                                                    |
| Supercontig_1.39_MV<br>LG_03850_9sp   | -482,27211 | -482,27211 | 0       | 0       | NS | 0 | 0 | 0 | 0 | 0 | hypothetical protein                         | PF00097.18 | zf-C3HC4(Zinc finger, C3HC4 type (RING finger))                                 |

|                                      |            |            |         |         |    |   |   |   |   |   |                               |            |                                                                            |
|--------------------------------------|------------|------------|---------|---------|----|---|---|---|---|---|-------------------------------|------------|----------------------------------------------------------------------------|
| Supercontig_1.7_MVL<br>G_01326_9sp   | -911,85856 | -911,60235 | 0,51242 | 0,22602 | NS | 0 | □ | □ | □ | □ | CAMK/CAMKL protein<br>kinase  | PF07714.10 | Pkinase_Tyr(Protein tyrosine<br>kinase)                                    |
| Supercontig_1.26_MV<br>LG_03051_10sp | -924,24898 | -924,21697 | 0,06402 | 0,0315  | NS | 0 | □ | □ | □ | □ | hypothetical protein          | PF00282.12 | Pyridoxal_deC(Pyridoxal-<br>dependent decarboxylase<br>conserved domain)   |
| Supercontig_1.104_MV<br>LG_06203_6sp | -496,10768 | -496,10756 | 0,00024 | 0,00012 | NS | 0 | □ | □ | □ | □ | hypothetical protein          | PF02222.15 | ATP-grasp(ATP-grasp domain)                                                |
| Supercontig_1.1_MVL<br>G_00213_12sp  | -864,71012 | -864,71008 | 0       | 0       | NS | 0 | □ | □ | □ | □ | hypothetical protein          | PF07539.5  | DRIM(Down-regulated in<br>metastasis)                                      |
| Supercontig_1.3_MVL<br>G_00581_11sp  | -1967,8864 | -1967,8748 | 0,02318 | 0,01152 | NS | 0 | □ | □ | □ | □ | hypothetical protein          | PF11732.1  | Thoc2(Transcription- and export-<br>related complex subunit)               |
| Supercontig_1.76_MV<br>LG_05519_9sp  | -597,50084 | -597,5007  | 0,00028 | 0,00014 | NS | 0 | □ | □ | □ | □ | syntaxin 5                    | PF05739.12 | SNARE(SNARE domain)                                                        |
| Supercontig_1.62_MV<br>LG_05029_10sp | -427,60677 | -427,60663 | 0,00028 | 0,00014 | NS | 0 | □ | □ | □ | □ | hypothetical protein          | PF02780.13 | Transketolase_C(Transketolase,<br>C-terminal domain)                       |
| Supercontig_1.70_MV<br>LG_05337_8sp  | -330,09899 | -330,09889 | 0,0002  | 0       | NS | 0 | □ | □ | □ | □ | hypothetical protein          | PF05832.5  | DUF846(Eukaryotic protein of<br>unknown function (DUF846))                 |
| Supercontig_1.1_MVL<br>G_00045_6sp   | -867,47319 | -867,47312 | 0,00014 | 0       | NS | 0 | □ | □ | □ | □ | hypothetical protein          | PF01956.9  | DUF106(Integral membrane<br>protein DUF106)                                |
| Supercontig_1.5_MVL<br>G_00881_8sp   | -590,8822  | -590,84852 | 0,06736 | 0,03312 | NS | 0 | □ | □ | □ | □ | hypothetical protein          | PF06602.7  | Myotub-related(Myotubularin-<br>related)                                   |
| Supercontig_1.9_MVL<br>G_01536_10sp  | -476,97292 | -477,29562 | 0       | 0       | NS | 0 | □ | □ | □ | □ | hypothetical protein          | PF12247.1  | MKT1_N(Temperature<br>dependent protein affecting M2<br>dsRNA replication) |
| Supercontig_1.19_MV<br>LG_02471_9sp  | -530,78476 | -530,78471 | 0       | 0       | NS | 0 | □ | □ | □ | □ | hypothetical protein          | PF00328.15 | Acid_phosphat_A(Histidine acid<br>phosphatase)                             |
| Supercontig_1.69_MV<br>LG_05300_8sp  | -1356,8387 | -1356,2262 | 1,22508 | 0,45803 | NS | 0 | □ | □ | □ | □ | hypothetical protein          | PF08568.3  | Kinetochor_Ybp2(Central<br>kinetochore-associated)                         |
| Supercontig_1.180_MV<br>LG_06995_8sp | -1031,4611 | -1031,4233 | 0,07552 | 0,03706 | NS | 0 | □ | □ | □ | □ | hypothetical protein          | PF01846.12 | FF(FF domain)                                                              |
| Supercontig_1.3_MVL<br>G_00511_11sp  | -633,01518 | -632,92831 | 0,17374 | 0,0832  | NS | 0 | □ | □ | □ | □ | hypothetical protein          | NA         | NA                                                                         |
| Supercontig_1.69_MV<br>LG_05282_10sp | -697,67529 | -697,67529 | 0       | 0       | NS | 0 | □ | □ | □ | □ | hypothetical protein          | PF06859.5  | Bin3(Bicoid-interacting protein 3<br>(Bin3))                               |
| Supercontig_1.21_MV<br>LG_02645_8sp  | -1687,0545 | -1687,0514 | 0,00622 | 0,00311 | NS | 0 | □ | □ | □ | □ | hypothetical protein          | NA         | NA                                                                         |
| Supercontig_1.125_MV<br>LG_06505_7sp | -415,35548 | -415,35548 | 0       | 0       | NS | 0 | □ | □ | □ | □ | ATP synthase subunit<br>alpha | PF00306.20 | ATP-synt_ab_C(ATP synthase<br>alpha/beta chain, C terminal<br>domain)      |
| Supercontig_1.200_MV<br>LG_07082_7sp | -1506,1195 | -1506,1195 | 0       | 0       | NS | 0 | □ | □ | □ | □ | hypothetical protein          | PF00400.25 | WD40(WD domain, G-beta<br>repeat)                                          |
| Supercontig_1.1_MVL<br>G_00216_7sp   | -396,24869 | -396,24866 | 0       | 0       | NS | 0 | □ | □ | □ | □ | hypothetical protein          | PF00664.16 | ABC_membrane(ABC<br>transporter transmembrane<br>region)                   |
| Supercontig_1.1_MVL<br>G_00128_10sp  | -498,36596 | -498,36588 | 0       | 0       | NS | 0 | □ | □ | □ | □ | hypothetical protein          | PF00415.11 | RCC1(Regulator of chromosome<br>condensation (RCC1) repeat)                |
| Supercontig_1.16_MV<br>LG_02202_8sp  | -638,76981 | -638,76981 | 0       | 0       | NS | 0 | □ | □ | □ | □ | hypothetical protein          | PF00010.19 | HLH(Helix-loop-helix DNA-<br>binding domain)                               |

|                                       |            |            |         |         |    |   |  |  |  |  |                              |            |                                                                         |
|---------------------------------------|------------|------------|---------|---------|----|---|--|--|--|--|------------------------------|------------|-------------------------------------------------------------------------|
| Supercontig_1.23_MV<br>LG_02771_10sp  | -531,43369 | -531,43339 | 0,0006  | 0,0003  | NS | 0 |  |  |  |  | hypothetical protein         | PF01490.11 | Aa_trans(Transmembrane amino acid transporter protein)                  |
| Supercontig_1.28_MV<br>LG_03147_9sp   | -292,9554  | -292,95524 | 0,00032 | 0,00016 | NS | 0 |  |  |  |  | hypothetical protein         | PF01246.13 | Ribosomal_L24e(Ribosomal protein L24e)                                  |
| Supercontig_1.3_MVL<br>G_00494_7sp    | -1243,2995 | -1240,9664 | 4,66608 | 0,903   | *  | 0 |  |  |  |  | hypothetical protein         | NA         | NA                                                                      |
| Supercontig_1.7_MVL<br>G_01243_9sp    | -1059,6676 | -1059,4136 | 0,50782 | 0,22424 | NS | 0 |  |  |  |  | hypothetical protein         | NA         | NA                                                                      |
| Supercontig_1.276_MV<br>LG_07227_11sp | -402,33466 | -402,33454 | 0,00024 | 0,00012 | NS | 0 |  |  |  |  | hypothetical protein         | PF01926.16 | MMR_HSR1(GTPase of unknown function)                                    |
| Supercontig_1.99_MV<br>LG_06126_12sp  | -1717,9197 | -1717,9197 | 0       | 0       | NS | 0 |  |  |  |  | hypothetical protein         | NA         | NA                                                                      |
| Supercontig_1.1_MVL<br>G_00066_7sp    | -708,19755 | -708,19755 | 0       | 0       | NS | 0 |  |  |  |  | hypothetical protein         | PF00638.11 | Ran_BP1(RanBP1 domain)                                                  |
| Supercontig_1.13_MV<br>LG_01963_8sp   | -459,64183 | -459,64165 | 0,00036 | 0,00018 | NS | 0 |  |  |  |  | hypothetical protein         | PF10447.2  | EXOSC1(Exosome component EXOSC1/CSL4)                                   |
| Supercontig_1.30_MV<br>LG_03299_9sp   | -365,48162 | -365,43071 | 0,10182 | 0,04964 | NS | 0 |  |  |  |  | CMGC/CDK/CDK8 protein kinase | PF07714.10 | Pkinase_Tyr(Protein tyrosine kinase)                                    |
| Supercontig_1.18_MV<br>LG_02426_8sp   | -401,48125 | -401,48112 | 0,00026 | 0,00013 | NS | 0 |  |  |  |  | hypothetical protein         | PF08530.3  | PepX_C(X-Pro dipeptidyl-peptidase C-terminal non-catalytic domain)      |
| Supercontig_1.10_MV<br>LG_01655_7sp   | -444,74365 | -444,74361 | 0       | 0       | NS | 0 |  |  |  |  | hypothetical protein         | PF07297.5  | DPM2(Dolichol phosphate-mannose biosynthesis regulatory protein (DPM2)) |
| Supercontig_1.21_MV<br>LG_02642_10sp  | -363,83713 | -363,83713 | 0       | 0       | NS | 0 |  |  |  |  | hypothetical protein         | PF05199.6  | GMC_oxred_C(GMC oxidoreductase)                                         |
| Supercontig_1.172_MV<br>LG_06952_10sp | -400,49852 | -400,49849 | 0       | 0       | NS | 0 |  |  |  |  | hypothetical protein         | PF00149.21 | Metallophos(Calcineurin-like phosphoesterase)                           |
| Supercontig_1.10_MV<br>LG_01619_10sp  | -984,43309 | -984,43309 | 0       | 0       | NS | 0 |  |  |  |  | hypothetical protein         | PF06058.6  | DCP1(Dcp1-like decapping family)                                        |
| Supercontig_1.60_MV<br>LG_04922_8sp   | -2318,6028 | -2318,6028 | 0       | 0       | NS | 0 |  |  |  |  | hypothetical protein         | PF04676.7  | CwfJ_C_2(Protein similar to CwfJ C-terminus 2)                          |
| Supercontig_1.28_MV<br>LG_03188_7sp   | -1942,5572 | -1942,5572 | 0       | 0       | NS | 0 |  |  |  |  | hypothetical protein         | NA         | NA                                                                      |
| Supercontig_1.3_MVL<br>G_00677_6sp    | -446,8376  | -446,79255 | 0,0901  | 0,04405 | NS | 0 |  |  |  |  | hypothetical protein         | NA         | NA                                                                      |
| Supercontig_1.6_MVL<br>G_01152_9sp    | -577,63902 | -577,63896 | 0,00012 | 0       | NS | 0 |  |  |  |  | hypothetical protein         | PF01694.15 | Rhomboid(Rhomboid family)                                               |
| Supercontig_1.55_MV<br>LG_04722_7sp   | -785,52547 | -785,52547 | 0       | 0       | NS | 0 |  |  |  |  | hypothetical protein         | PF07690.9  | MFS_1(Major Facilitator Superfamily)                                    |
| Supercontig_1.21_MV<br>LG_02662_10sp  | -518,84819 | -518,84819 | 0       | 0       | NS | 0 |  |  |  |  | hypothetical protein         | PF05383.10 | La(La domain)                                                           |
| Supercontig_1.150_MV<br>LG_06773_8sp  | -940,94673 | -940,94673 | 0       | 0       | NS | 0 |  |  |  |  | ferrochelatase               | PF00762.12 | Ferrochelatase(Ferrochelatase)                                          |
| Supercontig_1.1_MVL<br>G_00189_10sp   | -899,61794 | -898,81168 | 1,61252 | 0,55348 | NS | 0 |  |  |  |  | hypothetical protein         | PF05686.5  | DUF821(Arabidopsis thaliana protein of unknown function (DUF821))       |
| Supercontig_1.58_MV<br>LG_04871_8sp   | -1234,9049 | -1234,9049 | 0       | 0       | NS | 0 |  |  |  |  | hypothetical protein         | PF00899.14 | ThiF(ThiF family)                                                       |
| Supercontig_1.48_MV<br>LG_04389_8sp   | -503,61718 | -503,61718 | 0       | 0       | NS | 0 |  |  |  |  | hypothetical protein         | PF10294.2  | Methyltransf_16(Putative methyltransferase)                             |

|                                      |            |            |         |         |    |   |   |   |   |                           |            |                                                                               |
|--------------------------------------|------------|------------|---------|---------|----|---|---|---|---|---------------------------|------------|-------------------------------------------------------------------------------|
| Supercontig_1.32_MV<br>LG_03406_10sp | -542,91387 | -542,91387 | 0       | 0       | NS | 0 | 0 | 0 | 0 | hypothetical protein      | PF04488.8  | Gly_transf_sug(Glycosyltransferase sugar-binding region containing DXD motif) |
| Supercontig_1.19_MV<br>LG_02454_12sp | -513,9185  | -513,9185  | 0       | 0       | NS | 0 | 0 | 0 | 0 | hypothetical protein      | PF06094.5  | AIG2(AIG2-like family)                                                        |
| Supercontig_1.20_MV<br>LG_02534_7sp  | -657,61849 | -657,58061 | 0,07576 | 0,03717 | NS | 0 | 0 | 0 | 0 | hypothetical protein      | NA         | NA                                                                            |
| Supercontig_1.45_MV<br>LG_04205_10sp | -657,82636 | -657,82636 | 0       | 0       | NS | 0 | 0 | 0 | 0 | hypothetical protein      | NA         | NA                                                                            |
| Supercontig_1.50_MV<br>LG_04484_8sp  | -575,77598 | -575,77598 | 0       | 0       | NS | 0 | 0 | 0 | 0 | hypothetical protein      | NA         | NA                                                                            |
| Supercontig_1.15_MV<br>LG_02086_10sp | -438,05135 | -438,05132 | 0       | 0       | NS | 0 | 0 | 0 | 0 | hypothetical protein      | NA         | NA                                                                            |
| Supercontig_1.17_MV<br>LG_02265_7sp  | -1218,6601 | -1218,023  | 1,27424 | 0,47119 | NS | 0 | 0 | 0 | 0 | hypothetical protein      | TIGR00879  | TIGR00879(SP: MFS transporter, sugar porter (SP) family)                      |
| Supercontig_1.28_MV<br>LG_03191_7sp  | -382,53344 | -382,53344 | 0       | 0       | NS | 0 | 0 | 0 | 0 | hypothetical protein      | NA         | NA                                                                            |
| Supercontig_1.9_MVL<br>G_01504_9sp   | -531,98661 | -531,98661 | 0       | 0       | NS | 0 | 0 | 0 | 0 | hypothetical protein      | PF05875.5  | aPHC(Alkaline phytoceramidase (aPHC))                                         |
| Supercontig_1.123_MV<br>LG_06478_9sp | -365,14741 | -365,1474  | 0       | 0       | NS | 0 | 0 | 0 | 0 | CAMK/CAMKL protein kinase | PF07714.10 | Pkinase_Tyr(Protein tyrosine kinase)                                          |
| Supercontig_1.36_MV<br>LG_03674_8sp  | -336,55498 | -336,55498 | 0       | 0       | NS | 0 | 0 | 0 | 0 | hypothetical protein      | NA         | NA                                                                            |
| Supercontig_1.112_MV<br>LG_06320_6sp | -729,61773 | -729,61773 | 0       | 0       | NS | 0 | 0 | 0 | 0 | hypothetical protein      | PF00651.24 | BTB(BTB/POZ domain)                                                           |
| Supercontig_1.8_MVL<br>G_01411_10sp  | -301,84182 | -301,84176 | 0,00012 | 0       | NS | 0 | 0 | 0 | 0 | hypothetical protein      | PF09365.3  | DUF2461(Conserved hypothetical protein (DUF2461))                             |
| Supercontig_1.125_MV<br>LG_06502_6sp | -1080,0403 | -1080,0403 | 0       | 0       | NS | 0 | 0 | 0 | 0 | hypothetical protein      | PF01846.12 | FF(FF domain)                                                                 |
| Supercontig_1.6_MVL<br>G_01186_10sp  | -364,09657 | -363,84345 | 0,50624 | 0,22363 | NS | 0 | 0 | 0 | 0 | hypothetical protein      | PF00107.19 | ADH_zinc_N(Zinc-binding dehydrogenase)                                        |
| Supercontig_1.18_MV<br>LG_02393_11sp | -362,71657 | -362,26475 | 0,90364 | 0,36353 | NS | 0 | 0 | 0 | 0 | hypothetical protein      | PF01764.18 | Lipase_3(Lipase (class 3))                                                    |
| Supercontig_1.20_MV<br>LG_02539_8sp  | -613,36414 | -613,36414 | 0       | 0       | NS | 0 | 0 | 0 | 0 | thymidylate synthase      | TIGR03284  | TIGR03284(thym_sym: thymidylate synthase)                                     |
| Supercontig_1.61_MV<br>LG_04994_8sp  | -684,68802 | -684,68802 | 0       | 0       | NS | 0 | 0 | 0 | 0 | hypothetical protein      | PF00226.24 | DnaJ(DnaJ domain)                                                             |
| Supercontig_1.28_MV<br>LG_03193_6sp  | -537,44891 | -537,4452  | 0,00742 | 0,0037  | NS | 0 | 0 | 0 | 0 | hypothetical protein      | PF10302.2  | DUF2407(Putative membrane protein (DUF2407))                                  |
| Supercontig_1.92_MV<br>LG_05951_10sp | -808,59553 | -808,59553 | 0       | 0       | NS | 0 | 0 | 0 | 0 | hypothetical protein      | PF00150.11 | Cellulase(Cellulase (glycosyl hydrolase family 5))                            |
| Supercontig_1.3_MVL<br>G_00539_8sp   | -997,74377 | -996,94536 | 1,59682 | 0,54996 | NS | 0 | 0 | 0 | 0 | hypothetical protein      | PF02181.16 | FH2(Formin Homology 2 Domain)                                                 |
| Supercontig_1.36_MV<br>LG_03698_6sp  | -645,85991 | -645,70478 | 0,31026 | 0,1437  | NS | 0 | 0 | 0 | 0 | hypothetical protein      | NA         | NA                                                                            |
| Supercontig_1.49_MV<br>LG_04435_12sp | -557,87107 | -556,77649 | 2,18916 | 0,66532 | NS | 0 | 0 | 0 | 0 | hypothetical protein      | PF00018.21 | SH3_1(SH3 domain)                                                             |
| Supercontig_1.4_MVL<br>G_00741_8sp   | -997,88721 | -997,49395 | 0,78652 | 0,32515 | NS | 0 | 0 | 0 | 0 | hypothetical protein      | NA         | NA                                                                            |

|                                       |            |            |         |         |    |   |   |   |   |   |   |   |   |   |   |   |   |   |   |   |                                                      |            |                                                                    |
|---------------------------------------|------------|------------|---------|---------|----|---|---|---|---|---|---|---|---|---|---|---|---|---|---|---|------------------------------------------------------|------------|--------------------------------------------------------------------|
| Supercontig_1.112_MV<br>LG_06321_10sp | -312,58126 | -312,58122 | 0       | 0       | NS | 0 | 0 | 0 | 0 | 0 | 0 | 0 | 0 | 0 | 0 | 0 | 0 | 0 | 0 | 0 | hypothetical protein                                 | PF09796.2  | QCR10(Ubiquinol-cytochrome-c reductase complex subunit (QCR10))    |
| Supercontig_1.40_MV<br>LG_03955_8sp   | -551,69312 | -551,69312 | 0       | 0       | NS | 0 | 0 | 0 | 0 | 0 | 0 | 0 | 0 | 0 | 0 | 0 | 0 | 0 | 0 | 0 | hypothetical protein                                 | PF12464.1  | Mac(Maltose acetyltransferase)                                     |
| Supercontig_1.13_MV<br>LG_01934_8sp   | -436,76868 | -436,76037 | 0,01662 | 0,00828 | NS | 0 | 0 | 0 | 0 | 0 | 0 | 0 | 0 | 0 | 0 | 0 | 0 | 0 | 0 | 0 | hypothetical protein                                 | NA         | NA                                                                 |
| Supercontig_1.76_MV<br>LG_05517_7sp   | -704,0091  | -702,27144 | 3,47532 | 0,82407 | NS | 0 | 0 | 0 | 0 | 0 | 0 | 0 | 0 | 0 | 0 | 0 | 0 | 0 | 0 | 0 | hypothetical protein                                 | NA         | NA                                                                 |
| Supercontig_1.57_MV<br>LG_04814_8sp   | -688,65674 | -688,65674 | 0       | 0       | NS | 0 | 0 | 0 | 0 | 0 | 0 | 0 | 0 | 0 | 0 | 0 | 0 | 0 | 0 | 0 | hypothetical protein                                 | PF01170.11 | UPF0020(Putative RNA methylase family UPF0020)                     |
| Supercontig_1.12_MV<br>LG_01840_11sp  | -542,20407 | -542,18395 | 0,04024 | 0,01992 | NS | 0 | 0 | 0 | 0 | 0 | 0 | 0 | 0 | 0 | 0 | 0 | 0 | 0 | 0 | 0 | hypothetical protein                                 | NA         | NA                                                                 |
| Supercontig_1.49_MV<br>LG_04403_9sp   | -614,74182 | -614,74159 | 0,00046 | 0,00023 | NS | 0 | 0 | 0 | 0 | 0 | 0 | 0 | 0 | 0 | 0 | 0 | 0 | 0 | 0 | 0 | hypothetical protein                                 | PF02518.19 | HATPase_c(Histidine kinase-, DNA gyrase B-, and HSP90-like ATPase) |
| Supercontig_1.79_MV<br>LG_05608_6sp   | -779,87007 | -779,58369 | 0,57276 | 0,24902 | NS | 0 | 0 | 0 | 0 | 0 | 0 | 0 | 0 | 0 | 0 | 0 | 0 | 0 | 0 | 0 | eukaryotic translation initiation factor 3 subunit I | PF00400.25 | WD40(WD domain, G-beta repeat)                                     |
| Supercontig_1.276_MV<br>LG_07226_7sp  | -796,31636 | -795,64165 | 1,34942 | 0,4907  | NS | 0 | 0 | 0 | 0 | 0 | 0 | 0 | 0 | 0 | 0 | 0 | 0 | 0 | 0 | 0 | hypothetical protein                                 | PF06246.5  | Isy1(Isy1-like splicing family)                                    |
| Supercontig_1.59_MV<br>LG_04906_9sp   | -294,50483 | -294,50436 | 0,00094 | 0,00047 | NS | 0 | 0 | 0 | 0 | 0 | 0 | 0 | 0 | 0 | 0 | 0 | 0 | 0 | 0 | 0 | hypothetical protein                                 | PF00327.13 | Ribosomal_L30(Ribosomal protein L30p/L7e)                          |
| Supercontig_1.5_MVL<br>G_00975_8sp    | -411,69177 | -411,52601 | 0,33152 | 0,15275 | NS | 0 | 0 | 0 | 0 | 0 | 0 | 0 | 0 | 0 | 0 | 0 | 0 | 0 | 0 | 0 | hypothetical protein                                 | NA         | NA                                                                 |
| Supercontig_1.8_MVL<br>G_01396_10sp   | -411,70039 | -411,69621 | 0,00836 | 0,00417 | NS | 0 | 0 | 0 | 0 | 0 | 0 | 0 | 0 | 0 | 0 | 0 | 0 | 0 | 0 | 0 | hypothetical protein                                 | PF01105.17 | EMP24_GP25L(emp24/gp25L/p24 family/GOLD)                           |
| Supercontig_1.47_MV<br>LG_04338_8sp   | -617,12226 | -617,1196  | 0,00532 | 0,00266 | NS | 0 | 0 | 0 | 0 | 0 | 0 | 0 | 0 | 0 | 0 | 0 | 0 | 0 | 0 | 0 | hypothetical protein                                 | NA         | NA                                                                 |
| Supercontig_1.21_MV<br>LG_02634_10sp  | -399,9596  | -398,9721  | 1,975   | 0,62749 | NS | 0 | 0 | 0 | 0 | 0 | 0 | 0 | 0 | 0 | 0 | 0 | 0 | 0 | 0 | 0 | hypothetical protein                                 | PF09446.3  | VMA21(VMA21-like domain)                                           |
| Supercontig_1.39_MV<br>LG_03854_8sp   | -310,21183 | -310,21183 | 0       | 0       | NS | 0 | 0 | 0 | 0 | 0 | 0 | 0 | 0 | 0 | 0 | 0 | 0 | 0 | 0 | 0 | hypothetical protein                                 | NA         | NA                                                                 |
| Supercontig_1.86_MV<br>LG_05821_12sp  | -641,75158 | -641,75158 | 0       | 0       | NS | 0 | 0 | 0 | 0 | 0 | 0 | 0 | 0 | 0 | 0 | 0 | 0 | 0 | 0 | 0 | hypothetical protein                                 | PF00621.13 | RhoGEF(RhoGEF domain)                                              |
| Supercontig_1.21_MV<br>LG_02641_7sp   | -632,34978 | -632,34008 | 0,0194  | 0,00965 | NS | 0 | 0 | 0 | 0 | 0 | 0 | 0 | 0 | 0 | 0 | 0 | 0 | 0 | 0 | 0 | hypothetical protein                                 | PF00732.12 | GMC_oxred_N(GMC oxidoreductase)                                    |
| Supercontig_1.1_MVL<br>G_00108_9sp    | -505,56572 | -505,56122 | 0,009   | 0,00449 | NS | 0 | 0 | 0 | 0 | 0 | 0 | 0 | 0 | 0 | 0 | 0 | 0 | 0 | 0 | 0 | hypothetical protein                                 | PF01061.17 | ABC2_membrane(ABC-2 type transporter)                              |
| Supercontig_1.68_MV<br>LG_05265_11sp  | -486,42286 | -486,42271 | 0,0003  | 0,00015 | NS | 0 | 0 | 0 | 0 | 0 | 0 | 0 | 0 | 0 | 0 | 0 | 0 | 0 | 0 | 0 | hypothetical protein                                 | PF00134.16 | Cyclin_N(Cyclin, N-terminal domain)                                |
| Supercontig_1.93_MV<br>LG_05978_6sp   | -596,36949 | -596,36949 | 0       | 0       | NS | 0 | 0 | 0 | 0 | 0 | 0 | 0 | 0 | 0 | 0 | 0 | 0 | 0 | 0 | 0 | hypothetical protein                                 | PF01423.15 | LSM(LSM domain)                                                    |
| Supercontig_1.59_MV<br>LG_04916_7sp   | -824,66875 | -823,37707 | 2,58336 | 0,72519 | NS | 0 | 0 | 0 | 0 | 0 | 0 | 0 | 0 | 0 | 0 | 0 | 0 | 0 | 0 | 0 | hypothetical protein                                 | PF08588.3  | DUF1769(Protein of unknown function (DUF1769))                     |
| Supercontig_1.62_MV<br>LG_05010_7sp   | -1049,5524 | -1049,5524 | 0       | 0       | NS | 0 | 0 | 0 | 0 | 0 | 0 | 0 | 0 | 0 | 0 | 0 | 0 | 0 | 0 | 0 | hypothetical protein                                 | PF00106.18 | adh_short(short chain dehydrogenase)                               |
| Supercontig_1.101_MV<br>LG_06162_10sp | -688,66013 | -688,60967 | 0,10092 | 0,04921 | NS | 0 | 0 | 0 | 0 | 0 | 0 | 0 | 0 | 0 | 0 | 0 | 0 | 0 | 0 | 0 | hypothetical protein                                 | PF03152.7  | UFD1(Ubiquitin fusion degradation protein UFD1)                    |
| Supercontig_1.30_MV<br>LG_03280_8sp   | -1172,1735 | -1172,1656 | 0,01584 | 0,00789 | NS | 0 | 0 | 0 | 0 | 0 | 0 | 0 | 0 | 0 | 0 | 0 | 0 | 0 | 0 | 0 | hypothetical protein                                 | PF00611.16 | FCH(Fes/CIP4 homology domain)                                      |



|                                      |            |            |         |         |    |   |   |   |   |   |   |   |   |   |                                    |            |                                                                |
|--------------------------------------|------------|------------|---------|---------|----|---|---|---|---|---|---|---|---|---|------------------------------------|------------|----------------------------------------------------------------|
| Supercontig_1.86_MV<br>LG_05832_10sp | -642,88757 | -642,88757 | 0       | 0       | NS | 0 | 0 | 0 | 0 | 0 | 0 | 0 | 0 | 0 | hypothetical protein               | NA         | NA                                                             |
| Supercontig_1.26_MV<br>LG_03047_11sp | -543,28269 | -543,28268 | 0       | 0       | NS | 0 | 0 | 0 | 0 | 0 | 0 | 0 | 0 | 0 | hypothetical protein               | NA         | NA                                                             |
| Supercontig_1.116_MV<br>LG_06373_9sp | -375,87835 | -375,38752 | 0,98166 | 0,38788 | NS | 0 | 0 | 0 | 0 | 0 | 0 | 0 | 0 | 0 | chorismate mutase                  | PF01817.14 | CM_2(Chorismate mutase type II)                                |
| Supercontig_1.1_MVL<br>G_00067_8sp   | -459,67217 | -459,58663 | 0,17108 | 0,08198 | NS | 0 | 0 | 0 | 0 | 0 | 0 | 0 | 0 | 0 | urease accessory protein UreD      | PF01774.10 | UreD(UreD urease accessory protein)                            |
| Supercontig_1.5_MVL<br>G_01004_8sp   | -906,18682 | -906,18682 | 0       | 0       | NS | 0 | 0 | 0 | 0 | 0 | 0 | 0 | 0 | 0 | hypothetical protein               | NA         | NA                                                             |
| Supercontig_1.25_MV<br>LG_02928_9sp  | -397,8391  | -397,83891 | 0,00038 | 0,00019 | NS | 0 | 0 | 0 | 0 | 0 | 0 | 0 | 0 | 0 | 2,4-dienoyl-CoA reductase (NADPH2) | PF00106.18 | adh_short(short chain dehydrogenase)                           |
| Supercontig_1.2_MVL<br>G_00458_8sp   | -440,97404 | -440,97404 | 0       | 0       | NS | 0 | 0 | 0 | 0 | 0 | 0 | 0 | 0 | 0 | hypothetical protein               | PF00070.20 | Pyr_redox(Pyridine nucleotide-disulphide oxidoreductase)       |
| Supercontig_1.18_MV<br>LG_02349_8sp  | -500,61084 | -500,61084 | 0       | 0       | NS | 0 | 0 | 0 | 0 | 0 | 0 | 0 | 0 | 0 | hypothetical protein               | PF04096.7  | Nucleoporin2(Nucleoporin autopeptidase)                        |
| Supercontig_1.32_MV<br>LG_03395_8sp  | -1607,1878 | -1607,1878 | 0       | 0       | NS | 0 | 0 | 0 | 0 | 0 | 0 | 0 | 0 | 0 | hypothetical protein               | NA         | NA                                                             |
| Supercontig_1.39_MV<br>LG_03877_10sp | -569,4343  | -569,4343  | 0       | 0       | NS | 0 | 0 | 0 | 0 | 0 | 0 | 0 | 0 | 0 | hypothetical protein               | PF10391.2  | DNA_po_lambd_f(Fingers domain of DNA polymerase lambda)        |
| Supercontig_1.31_MV<br>LG_03353_8sp  | -643,93657 | -643,93657 | 0       | 0       | NS | 0 | 0 | 0 | 0 | 0 | 0 | 0 | 0 | 0 | GTP-binding protein rho2           | PF08477.6  | Miro(Miro-like protein)                                        |
| Supercontig_1.249_MV<br>LG_07214_7sp | -567,19132 | -567,1913  | 0       | 0       | NS | 0 | 0 | 0 | 0 | 0 | 0 | 0 | 0 | 0 | hypothetical protein               | PF03556.8  | DUF298(Domain of unknown function (DUF298))                    |
| Supercontig_1.6_MVL<br>G_01196_12sp  | -499,43012 | -499,43011 | 0       | 0       | NS | 0 | 0 | 0 | 0 | 0 | 0 | 0 | 0 | 0 | hypothetical protein               | PF01300.11 | Sua5_yciO_yrdC(yrdC domain)                                    |
| Supercontig_1.22_MV<br>LG_02752_8sp  | -1360,1455 | -1360,1455 | 0       | 0       | NS | 0 | 0 | 0 | 0 | 0 | 0 | 0 | 0 | 0 | hypothetical protein               | PF00169.22 | PH(PH domain)                                                  |
| Supercontig_1.109_MV<br>LG_06277_7sp | -615,69933 | -615,6984  | 0,00186 | 0,00093 | NS | 0 | 0 | 0 | 0 | 0 | 0 | 0 | 0 | 0 | hypothetical protein               | PF00076.15 | RRM_1(RNA recognition motif. (a.k.a. RRM, RBD, or RNP domain)) |
| Supercontig_1.32_MV<br>LG_03397_10sp | -461,37968 | -461,36155 | 0,03626 | 0,01797 | NS | 0 | 0 | 0 | 0 | 0 | 0 | 0 | 0 | 0 | hypothetical protein               | TIGR00880  | TIGR00880(2_A_01_02: Multidrug resistance protein)             |
| Supercontig_1.4_MVL<br>G_00846_8sp   | -536,28222 | -536,28221 | 0       | 0       | NS | 0 | 0 | 0 | 0 | 0 | 0 | 0 | 0 | 0 | hypothetical protein               | NA         | NA                                                             |
| Supercontig_1.53_MV<br>LG_04648_10sp | -434,41659 | -434,41655 | 0       | 0       | NS | 0 | 0 | 0 | 0 | 0 | 0 | 0 | 0 | 0 | hypothetical protein               | PF00348.10 | polyprenyl_synt(Polyprenyl synthetase)                         |
| Supercontig_1.97_MV<br>LG_06069_11sp | -788,21316 | -787,97599 | 0,47434 | 0,21114 | NS | 0 | 0 | 0 | 0 | 0 | 0 | 0 | 0 | 0 | hypothetical protein               | PF00149.21 | Metallophos(Calcineurin-like phosphoesterase)                  |
| Supercontig_1.26_MV<br>LG_02997_12sp | -459,034   | -457,30291 | 3,46218 | 0,82291 | NS | 0 | 0 | 0 | 0 | 0 | 0 | 0 | 0 | 0 | hypothetical protein               | NA         | NA                                                             |
| Supercontig_1.70_MV<br>LG_05338_12sp | -357,60588 | -357,60575 | 0,00026 | 0,00013 | NS | 0 | 0 | 0 | 0 | 0 | 0 | 0 | 0 | 0 | hypothetical protein               | PF12074.1  | DUF3554(Domain of unknown function (DUF3554))                  |
| Supercontig_1.64_MV<br>LG_05097_8sp  | -874,81348 | -874,81348 | 0       | 0       | NS | 0 | 0 | 0 | 0 | 0 | 0 | 0 | 0 | 0 | threonine dehydratase              | PF00291.18 | PALP(Pyridoxal-phosphate dependent enzyme)                     |
| Supercontig_1.1_MVL<br>G_00006_10sp  | -516,63964 | -516,63964 | 0       | 0       | NS | 0 | 0 | 0 | 0 | 0 | 0 | 0 | 0 | 0 | hypothetical protein               | PF00850.12 | Hist_deacetyl(Histone deacetylase domain)                      |
| Supercontig_1.10_MV<br>LG_01601_10sp | -418,68565 | -418,6855  | 0,0003  | 0,00015 | NS | 0 | 0 | 0 | 0 | 0 | 0 | 0 | 0 | 0 | hypothetical protein               | PF03168.6  | LEA_2(Late embryogenesis abundant protein)                     |
| Supercontig_1.66_MV<br>LG_05198_9sp  | -616,09952 | -616,09952 | 0       | 0       | NS | 0 | 0 | 0 | 0 | 0 | 0 | 0 | 0 | 0 | acetoacetate-CoA ligase            | TIGR01217  | TIGR01217(ac_ac_CoA_syn: acetoacetate-CoA ligase)              |

|                                      |            |            |         |         |    |   |   |   |   |   |   |   |                                            |            |                                                                                           |
|--------------------------------------|------------|------------|---------|---------|----|---|---|---|---|---|---|---|--------------------------------------------|------------|-------------------------------------------------------------------------------------------|
| Supercontig_1.56_MV<br>LG_04769_9sp  | -1073,4094 | -1071,7606 | 3,29778 | 0,80774 | NS | 0 | ☐ | ☐ | ☐ | ☐ | ☐ | ☐ | hypothetical protein                       | PF02778.7  | tRNA_int_endo_N(tRNA intron endonuclease, N-terminal domain)                              |
| Supercontig_1.94_MV<br>LG_05996_11sp | -370,24363 | -368,89123 | 2,7048  | 0,74138 | NS | 0 | ☐ | ☐ | ☐ | ☐ | ☐ | ☐ | hypothetical protein                       | TIGR00163  | TIGR00163(PS_decarb: phosphatidylserine decarboxylase)                                    |
| Supercontig_1.13_MV<br>LG_01906_10sp | -790,71589 | -790,71589 | 0       | 0       | NS | 0 | ☐ | ☐ | ☐ | ☐ | ☐ | ☐ | hypothetical protein                       | PF10360.2  | DUF2433(Protein of unknown function (DUF2433))                                            |
| Supercontig_1.94_MV<br>LG_05997_8sp  | -949,33698 | -949,33679 | 0,00038 | 0,00019 | NS | 0 | ☐ | ☐ | ☐ | ☐ | ☐ | ☐ | branched-chain amino acid aminotransferase | PF01063.12 | Aminotran_4(Aminotransferase class IV)                                                    |
| Supercontig_1.27_MV<br>LG_03081_7sp  | -708,82478 | -708,40306 | 0,84344 | 0,34408 | NS | 0 | ☐ | ☐ | ☐ | ☐ | ☐ | ☐ | hypothetical protein                       | PF04117.5  | Mpv17_PMP22(Mpv17 / PMP22 family)                                                         |
| Supercontig_1.48_MV<br>LG_04385_8sp  | -1198,3014 | -1198,3014 | 0       | 0       | NS | 0 | ☐ | ☐ | ☐ | ☐ | ☐ | ☐ | hypothetical protein                       | PF00155.14 | Aminotran_1_2(Aminotransferase class I and II)                                            |
| Supercontig_1.87_MV<br>LG_05870_7sp  | -446,59953 | -446,36871 | 0,46164 | 0,20612 | NS | 0 | ☐ | ☐ | ☐ | ☐ | ☐ | ☐ | hypothetical protein                       | NA         | NA                                                                                        |
| Supercontig_1.117_MV<br>LG_06394_7sp | -313,92032 | -313,92022 | 0,0002  | 0       | NS | 0 | ☐ | ☐ | ☐ | ☐ | ☐ | ☐ | 3-hydroxyanthranilate 3,4-dioxygenase 2    | TIGR03037  | TIGR03037(anthran_nbaC: 3-hydroxyanthranilate 3,4-dioxygenase)                            |
| Supercontig_1.57_MV<br>LG_04839_7sp  | -578,03764 | -578,03764 | 0       | 0       | NS | 0 | ☐ | ☐ | ☐ | ☐ | ☐ | ☐ | 4-aminobutyrate aminotransferase           | PF00202.14 | Aminotran_3(Aminotransferase class-III)                                                   |
| Supercontig_1.52_MV<br>LG_04583_10sp | -773,21736 | -773,21619 | 0,00234 | 0,00117 | NS | 0 | ☐ | ☐ | ☐ | ☐ | ☐ | ☐ | hypothetical protein                       | NA         | NA                                                                                        |
| Supercontig_1.5_MVL<br>G_00985_7sp   | -390,81265 | -390,81265 | 0       | 0       | NS | 0 | ☐ | ☐ | ☐ | ☐ | ☐ | ☐ | hypothetical protein                       | NA         | NA                                                                                        |
| Supercontig_1.55_MV<br>LG_04716_9sp  | -433,73949 | -433,73928 | 0,00042 | 0,00021 | NS | 0 | ☐ | ☐ | ☐ | ☐ | ☐ | ☐ | hypothetical protein                       | PF00808.16 | CBFD_NFYB_HMF(Histone-like transcription factor (CBF/NF- $\gamma$ ) and archaeal histone) |
| Supercontig_1.105_MV<br>LG_06216_8sp | -1486,7469 | -1486,7469 | 0       | 0       | NS | 0 | ☐ | ☐ | ☐ | ☐ | ☐ | ☐ | hypothetical protein                       | PF09763.2  | Sec3(Exocyst complex component Sec3)                                                      |
| Supercontig_1.1_MVL<br>G_00163_10sp  | -776,57551 | -776,57532 | 0,00038 | 0,00019 | NS | 0 | ☐ | ☐ | ☐ | ☐ | ☐ | ☐ | hypothetical protein                       | PF07724.7  | AAA_2(AAA domain (Cdc48 subfamily))                                                       |
| Supercontig_1.91_MV<br>LG_05931_7sp  | -1368,6944 | -1368,6826 | 0,02378 | 0,01182 | NS | 0 | ☐ | ☐ | ☐ | ☐ | ☐ | ☐ | hypothetical protein                       | NA         | NA                                                                                        |
| Supercontig_1.1_MVL<br>G_00026_10sp  | -657,77926 | -657,44747 | 0,66358 | 0,28236 | NS | 0 | ☐ | ☐ | ☐ | ☐ | ☐ | ☐ | hypothetical protein                       | PF01565.16 | FAD_binding_4(FAD binding domain)                                                         |
| Supercontig_1.88_MV<br>LG_05883_11sp | -450,6027  | -450,6027  | 0       | 0       | NS | 0 | ☐ | ☐ | ☐ | ☐ | ☐ | ☐ | 18S rRNA biogenesis protein RCL1           | PF05189.6  | RTC_insert(RNA 3'-terminal phosphate cyclase (RTC), insert domain)                        |
| Supercontig_1.12_MV<br>LG_01797_8sp  | -1644,5159 | -1644,5159 | 0       | 0       | NS | 0 | ☐ | ☐ | ☐ | ☐ | ☐ | ☐ | hypothetical protein                       | PF00575.16 | S1(S1 RNA binding domain)                                                                 |
| Supercontig_1.8_MVL<br>G_01464_8sp   | -472,09169 | -472,09169 | 0       | 0       | NS | 0 | ☐ | ☐ | ☐ | ☐ | ☐ | ☐ | hypothetical protein                       | NA         | NA                                                                                        |
| Supercontig_1.5_MVL<br>G_00911_7sp   | -370,03775 | -368,40202 | 3,27146 | 0,80519 | NS | 0 | ☐ | ☐ | ☐ | ☐ | ☐ | ☐ | hypothetical protein                       | NA         | NA                                                                                        |
| Supercontig_1.34_MV<br>LG_03526_6sp  | -649,57527 | -649,57527 | 0       | 0       | NS | 0 | ☐ | ☐ | ☐ | ☐ | ☐ | ☐ | hypothetical protein                       | PF05856.5  | ARPC4(ARP2/3 complex 20 kDa subunit (ARPC4))                                              |
| Supercontig_1.24_MV<br>LG_02904_6sp  | -653,65589 | -653,65581 | 0,00016 | 0       | NS | 0 | ☐ | ☐ | ☐ | ☐ | ☐ | ☐ | hypothetical protein                       | PF00326.14 | Peptidase_S9(Prolyl oligopeptidase family)                                                |

|                                      |            |            |         |         |    |   |  |  |  |  |                        |            |                                                           |
|--------------------------------------|------------|------------|---------|---------|----|---|--|--|--|--|------------------------|------------|-----------------------------------------------------------|
| Supercontig_1.11_MV<br>LG_01770_7sp  | -564,1819  | -564,18069 | 0,00242 | 0,00121 | NS | 0 |  |  |  |  | hypothetical protein   | NA         | NA                                                        |
| Supercontig_1.2_MVL<br>G_00375_12sp  | -468,41375 | -468,39936 | 0,02878 | 0,01429 | NS | 0 |  |  |  |  | hypothetical protein   | PF00022.12 | Actin(Actin)                                              |
| Supercontig_1.5_MVL<br>G_00910_10sp  | -677,11229 | -676,56249 | 1,0996  | 0,42293 | NS | 0 |  |  |  |  | hypothetical protein   | NA         | NA                                                        |
| Supercontig_1.66_MV<br>LG_05191_8sp  | -685,1982  | -684,69854 | 0,99932 | 0,39326 | NS | 0 |  |  |  |  | hypothetical protein   | NA         | NA                                                        |
| Supercontig_1.11_MV<br>LG_01689_8sp  | -416,58408 | -416,58408 | 0       | 0       | NS | 0 |  |  |  |  | hypothetical protein   | PF07985.5  | SRR1(SRR1)                                                |
| Supercontig_1.31_MV<br>LG_03383_6sp  | -543,8599  | -543,8599  | 0       | 0       | NS | 0 |  |  |  |  | hypothetical protein   | PF00875.11 | DNA_photolyase(DNA photolyase)                            |
| Supercontig_1.52_MV<br>LG_04576_7sp  | -951,13446 | -951,13427 | 0,00038 | 0,00019 | NS | 0 |  |  |  |  | hypothetical protein   | PF11051.1  | Mannosyl_trans3(Mannosyltransferase putative)             |
| Supercontig_1.109_MV<br>LG_06286_7sp | -476,92185 | -476,92185 | 0       | 0       | NS | 0 |  |  |  |  | hypothetical protein   | PF00348.10 | polyprenyl_synt(Polyprenyl synthetase)                    |
| Supercontig_1.6_MVL<br>G_01181_7sp   | -359,363   | -359,28248 | 0,16104 | 0,07736 | NS | 0 |  |  |  |  | hypothetical protein   | TIGR01068  | TIGR01068(thioredoxin: thioredoxin)                       |
| Supercontig_1.94_MV<br>LG_06000_7sp  | -453,37778 | -453,37778 | 0       | 0       | NS | 0 |  |  |  |  | hypothetical protein   | PF06080.5  | DUF938(Protein of unknown function (DUF938))              |
| Supercontig_1.33_MV<br>LG_03490_7sp  | -357,52588 | -354,84159 | 5,36858 | 0,93173 | *  | 0 |  |  |  |  | hypothetical protein   | PF07993.5  | NAD_binding_4(Male sterility protein)                     |
| Supercontig_1.33_MV<br>LG_03450_7sp  | -1376,8153 | -1376,7568 | 0,11708 | 0,05686 | NS | 0 |  |  |  |  | hypothetical protein   | PF11735.1  | CAP59_mtransfer(Cryptococcal mannosyltransferase 1)       |
| Supercontig_1.1_MVL<br>G_00137_11sp  | -521,12621 | -521,12497 | 0,00248 | 0,00124 | NS | 0 |  |  |  |  | hypothetical protein   | NA         | NA                                                        |
| Supercontig_1.5_MVL<br>G_00944_7sp   | -733,60389 | -732,6826  | 1,84258 | 0,60199 | NS | 0 |  |  |  |  | AGC/NDR protein kinase | PF07714.10 | Pkinase_Tyr(Protein tyrosine kinase)                      |
| Supercontig_1.18_MV<br>LG_02424_11sp | -326,53107 | -326,53106 | 0       | 0       | NS | 0 |  |  |  |  | hypothetical protein   | PF04082.11 | Fungal_trans(Fungal specific transcription factor domain) |
| Supercontig_1.123_MV<br>LG_06474_9sp | -917,09436 | -917,09436 | 0       | 0       | NS | 0 |  |  |  |  | hypothetical protein   | PF00135.21 | COesterase(Carboxylesterase)                              |
| Supercontig_1.28_MV<br>LG_03172_6sp  | -675,03521 | -675,0352  | 0       | 0       | NS | 0 |  |  |  |  | hypothetical protein   | PF02845.9  | CUE(CUE domain)                                           |
| Supercontig_1.39_MV<br>LG_03857_9sp  | -429,81063 | -429,81045 | 0,00036 | 0,00018 | NS | 0 |  |  |  |  | hypothetical protein   | PF00583.17 | Acetyltransf_1(Acetyltransferase (GNAT) family)           |
| Supercontig_1.87_MV<br>LG_05869_7sp  | -648,67989 | -648,67988 | 0       | 0       | NS | 0 |  |  |  |  | hypothetical protein   | PF01758.9  | SBF(Sodium Bile acid symporter family)                    |
| Supercontig_1.87_MV<br>LG_05849_12sp | -441,01181 | -441,01181 | 0       | 0       | NS | 0 |  |  |  |  | acetate kinase         | TIGR00016  | TIGR00016(ackA: acetate kinase)                           |
| Supercontig_1.4_MVL<br>G_00808_10sp  | -768,49266 | -767,35094 | 2,28344 | 0,68073 | NS | 0 |  |  |  |  | hypothetical protein   | PF00884.16 | Sulfatase(Sulfatase)                                      |
| Supercontig_1.11_MV<br>LG_01790_10sp | -653,94579 | -651,841   | 4,20958 | 0,87813 | NS | 0 |  |  |  |  | hypothetical protein   | NA         | NA                                                        |
| Supercontig_1.11_MV<br>LG_01712_11sp | -375,14735 | -375,14735 | 0       | 0       | NS | 0 |  |  |  |  | hypothetical protein   | PF03765.8  | CRAL_TRIO_N(CRAL/TRIO, N-terminus)                        |
| Supercontig_1.17_MV<br>LG_02287_9sp  | -677,67186 | -677,64328 | 0,05716 | 0,02818 | NS | 0 |  |  |  |  | hypothetical protein   | PF09335.4  | SNARE_assoc(SNARE associated Golgi protein)               |
| Supercontig_1.25_MV<br>LG_02915_10sp | -535,95016 | -535,95016 | 0       | 0       | NS | 0 |  |  |  |  | hypothetical protein   | PF05557.6  | MAD(Mitotic checkpoint protein)                           |

|                                       |            |            |         |         |    |   |   |   |   |   |                                                                    |            |                                                                                  |
|---------------------------------------|------------|------------|---------|---------|----|---|---|---|---|---|--------------------------------------------------------------------|------------|----------------------------------------------------------------------------------|
| Supercontig_1.75_MV<br>LG_05481_7sp   | -894,94186 | -894,94136 | 0,001   | 0,0005  | NS | 0 | □ | □ | □ | □ | developmentally-<br>regulated GTP-binding<br>protein 2             | PF02421.11 | FeoB_N(Ferrous iron transport<br>protein B)                                      |
| Supercontig_1.5_MVL<br>G_01024_11sp   | -392,71714 | -392,71714 | 0       | 0       | NS | 0 | □ | □ | □ | □ | hypothetical protein                                               | PF00172.11 | Zn_clus(Fungal Zn(2)-Cys(6)<br>binuclear cluster domain)                         |
| Supercontig_1.35_MV<br>LG_03577_9sp   | -897,77159 | -897,24248 | 1,05822 | 0,41087 | NS | 0 | □ | □ | □ | □ | hypothetical protein                                               | NA         | NA                                                                               |
| Supercontig_1.5_MVL<br>G_00901_8sp    | -671,04026 | -670,62026 | 0,84    | 0,34295 | NS | 0 | □ | □ | □ | □ | hypothetical protein                                               | PF08477.6  | Miro(Miro-like protein)                                                          |
| Supercontig_1.6_MVL<br>G_01178_7sp    | -289,12472 | -289,12455 | 0,00034 | 0,00017 | NS | 0 | □ | □ | □ | □ | hypothetical protein                                               | NA         | NA                                                                               |
| Supercontig_1.66_MV<br>LG_05187_7sp   | -797,45636 | -797,45623 | 0,00026 | 0,00013 | NS | 0 | □ | □ | □ | □ | CAMK/CAMKL/CHK1<br>protein kinase                                  | PF07714.10 | Pkinase_Tyr(Protein tyrosine<br>kinase)                                          |
| Supercontig_1.63_MV<br>LG_05057_6sp   | -730,2798  | -730,2798  | 0       | 0       | NS | 0 | □ | □ | □ | □ | serine/threonine-<br>protein phosphatase<br>PP2A catalytic subunit | PF00149.21 | Metallophos(Calcineurin-like<br>phosphoesterase)                                 |
| Supercontig_1.19_MV<br>LG_02509_9sp   | -660,68339 | -660,68318 | 0,00042 | 0,00021 | NS | 0 | □ | □ | □ | □ | hypothetical protein                                               | PF01556.11 | DnaJ_C(DnaJ C terminal region)                                                   |
| Supercontig_1.3_MVL<br>G_00542_10sp   | -826,90481 | -826,77224 | 0,26514 | 0,12416 | NS | 0 | □ | □ | □ | □ | hypothetical protein                                               | TIGR01494  | TIGR01494(ATPase_P-type:<br>HAD ATPase, P-type, family IC)                       |
| Supercontig_1.2_MVL<br>G_00336_9sp    | -401,71744 | -401,71744 | 0       | 0       | NS | 0 | □ | □ | □ | □ | hypothetical protein                                               | PF06687.5  | SUR7(SUR7/Pall family)                                                           |
| Supercontig_1.121_MV<br>LG_06437_10sp | -486,6109  | -486,36324 | 0,49532 | 0,21937 | NS | 0 | □ | □ | □ | □ | hypothetical protein                                               | NA         | NA                                                                               |
| Supercontig_1.4_MVL<br>G_00785_11sp   | -603,56778 | -600,70608 | 5,7234  | 0,94283 | *  | 0 | □ | □ | □ | □ | hypothetical protein                                               | PF11861.1  | DUF3381(Domain of unknown<br>function (DUF3381))                                 |
| Supercontig_1.5_MVL<br>G_00954_6sp    | -805,01183 | -805,01165 | 0,00036 | 0,00018 | NS | 0 | □ | □ | □ | □ | hypothetical protein                                               | NA         | NA                                                                               |
| Supercontig_1.52_MV<br>LG_04568_11sp  | -889,86782 | -888,73403 | 2,26758 | 0,67819 | NS | 0 | □ | □ | □ | □ | hypothetical protein                                               | NA         | NA                                                                               |
| Supercontig_1.62_MV<br>LG_05002_11sp  | -2182,8572 | -2179,8899 | 5,93454 | 0,94856 | *  | 0 | □ | □ | □ | □ | hypothetical protein                                               | PF11001.1  | DUF2841(Protein of unknown<br>function (DUF2841))                                |
| Supercontig_1.84_MV<br>LG_05753_12sp  | -450,42668 | -450,42668 | 0       | 0       | NS | 0 | □ | □ | □ | □ | hypothetical protein                                               | PF09830.2  | ATP_transf(ATP<br>adenyllyltransferase)                                          |
| Supercontig_1.141_MV<br>LG_06700_8sp  | -929,09108 | -927,49701 | 3,18814 | 0,7969  | NS | 0 | □ | □ | □ | □ | hypothetical protein                                               | PF10231.2  | DUF2315(Uncharacterised<br>conserved protein (DUF2315))                          |
| Supercontig_1.40_MV<br>LG_03917_11sp  | -375,21919 | -375,21919 | 0       | 0       | NS | 0 | □ | □ | □ | □ | hypothetical protein                                               | PF00160.14 | Pro_isomerase(Cyclophilin type<br>peptidyl-prolyl cis-trans<br>isomerase/CLD)    |
| Supercontig_1.2_MVL<br>G_00371_9sp    | -797,73166 | -797,73157 | 0,00018 | 0       | NS | 0 | □ | □ | □ | □ | hypothetical protein                                               | PF00004.22 | AAA(ATPase family associated<br>with various cellular activities<br>(AAA))       |
| Supercontig_1.3_MVL<br>G_00512_6sp    | -484,11997 | -483,51603 | 1,20788 | 0,45335 | NS | 0 | □ | □ | □ | □ | 60S ribosomal protein<br>L19                                       | PF00298.12 | Ribosomal_L11(Ribosomal<br>protein L11, RNA binding<br>domain)                   |
| Supercontig_1.22_MV<br>LG_02696_9sp   | -938,45765 | -938,4304  | 0,0545  | 0,02688 | NS | 0 | □ | □ | □ | □ | hypothetical protein                                               | PF06881.4  | Elongin_A(RNA polymerase II<br>transcription factor SIII (Elongin)<br>subunit A) |

|                                       |            |            |         |         |    |   |   |   |   |   |                                               |            |                                                                               |
|---------------------------------------|------------|------------|---------|---------|----|---|---|---|---|---|-----------------------------------------------|------------|-------------------------------------------------------------------------------|
| Supercontig_1.22_MV<br>LG_02738_9sp   | -494,22832 | -494,22831 | 0       | 0       | NS | 0 | 0 | 0 | 0 | 0 | hypothetical protein                          | PF02417.8  | Chromate_transp(Chromate transporter)                                         |
| Supercontig_1.23_MV<br>LG_02825_10sp  | -799,74427 | -799,74427 | 0       | 0       | NS | 0 | 0 | 0 | 0 | 0 | hypothetical protein                          | PF06422.5  | PDR_CDR(CDR ABC transporter)                                                  |
| Supercontig_1.2_MVL<br>G_00285_9sp    | -479,47057 | -479,47057 | 0       | 0       | NS | 0 | 0 | 0 | 0 | 0 | 6-phosphogluconolactonase                     | PF01182.13 | Glucosamine_iso(Glucosamine-6-phosphate isomerases/6-phosphogluconolactonase) |
| Supercontig_1.94_MV<br>LG_06003_8sp   | -893,71957 | -892,66857 | 2,102   | 0,65041 | NS | 0 | 0 | 0 | 0 | 0 | hypothetical protein                          | NA         | NA                                                                            |
| Supercontig_1.22_MV<br>LG_02702_8sp   | -882,79074 | -881,21571 | 3,15006 | 0,793   | NS | 0 | 0 | 0 | 0 | 0 | hypothetical protein                          | PF00400.25 | WD40(WD domain, G-beta repeat)                                                |
| Supercontig_1.93_MV<br>LG_05980_9sp   | -413,17849 | -413,17847 | 0       | 0       | NS | 0 | 0 | 0 | 0 | 0 | medium-chain specific acyl-CoA dehydrogenase  | PF02770.12 | Acyl-CoA_dh_M(Acyl-CoA dehydrogenase, middle domain)                          |
| Supercontig_1.120_MV<br>LG_06424_10sp | -1018,4281 | -1018,4281 | 0       | 0       | NS | 0 | 0 | 0 | 0 | 0 | hypothetical protein                          | PF00722.14 | Glyco_hydro_16(Glycosyl hydrolases family 16)                                 |
| Supercontig_1.6_MVL<br>G_01136_6sp    | -1649,557  | -1649,557  | 0       | 0       | NS | 0 | 0 | 0 | 0 | 0 | hypothetical protein                          | PF05843.7  | Suf(Suppressor of forked protein (Suf))                                       |
| Supercontig_1.6_MVL<br>G_01162_10sp   | -340,19136 | -340,19126 | 0       | 0       | NS | 0 | 0 | 0 | 0 | 0 | hypothetical protein                          | PF05793.5  | TFIIF_alpha(Transcription initiation factor IIF, alpha subunit (TFIIF-alpha)) |
| Supercontig_1.19_MV<br>LG_02515_8sp   | -479,18531 | -479,18531 | 0       | 0       | NS | 0 | 0 | 0 | 0 | 0 | hypothetical protein                          | PF09139.4  | Mmp37(Mitochondrial matrix Mmp37)                                             |
| Supercontig_1.8_MVL<br>G_01376_6sp    | -468,50691 | -468,50683 | 0       | 0       | NS | 0 | 0 | 0 | 0 | 0 | CMGC/CDK protein kinase                       | PF07714.10 | Pkinase_Tyr(Protein tyrosine kinase)                                          |
| Supercontig_1.5_MVL<br>G_00895_10sp   | -700,22791 | -698,87138 | 2,71306 | 0,74245 | NS | 0 | 0 | 0 | 0 | 0 | hypothetical protein                          | NA         | NA                                                                            |
| Supercontig_1.50_MV<br>LG_04469_9sp   | -1015,7298 | -1015,4274 | 0,60478 | 0,26095 | NS | 0 | 0 | 0 | 0 | 0 | hypothetical protein                          | PF11882.1  | DUF3402(Domain of unknown function (DUF3402))                                 |
| Supercontig_1.4_MVL<br>G_00792_9sp    | -1115,0356 | -1115,0356 | 0       | 0       | NS | 0 | 0 | 0 | 0 | 0 | hypothetical protein                          | PF07522.7  | DRMBL(DNA repair metallo-beta-lactamase)                                      |
| Supercontig_1.79_MV<br>LG_05617_8sp   | -475,7212  | -475,7208  | 0,0008  | 0,0004  | NS | 0 | 0 | 0 | 0 | 0 | vacuolar protein sorting-associated protein 1 | PF00350.16 | Dynamin_N(Dynamin family)                                                     |
| Supercontig_1.18_MV<br>LG_02379_10sp  | -642,5675  | -642,5675  | 0       | 0       | NS | 0 | 0 | 0 | 0 | 0 | hypothetical protein                          | NA         | NA                                                                            |
| Supercontig_1.7_MVL<br>G_01307_12sp   | -606,39984 | -606,39591 | 0,00786 | 0,00392 | NS | 0 | 0 | 0 | 0 | 0 | hypothetical protein                          | PF08613.4  | Cyclin(Cyclin)                                                                |
| Supercontig_1.54_MV<br>LG_04698_10sp  | -427,85709 | -427,65146 | 0,41126 | 0,18587 | NS | 0 | 0 | 0 | 0 | 0 | hypothetical protein                          | PF08628.5  | Nexin_C(Sorting nexin C terminal)                                             |
| Supercontig_1.88_MV<br>LG_05895_7sp   | -788,01689 | -788,01689 | 0       | 0       | NS | 0 | 0 | 0 | 0 | 0 | hypothetical protein                          | NA         | NA                                                                            |
| Supercontig_1.1_MVL<br>G_00169_9sp    | -486,17858 | -486,17858 | 0       | 0       | NS | 0 | 0 | 0 | 0 | 0 | initiator tRNA phosphoribosyl transferase     | PF04179.5  | Init_tRNA_PT(Initiator tRNA phosphoribosyl transferase)                       |
| Supercontig_1.12_MV<br>LG_01881_10sp  | -497,89676 | -496,15166 | 3,4902  | 0,82537 | NS | 0 | 0 | 0 | 0 | 0 | hypothetical protein                          | PF09748.2  | Med10(Transcription factor subunit Med10 of Mediator complex)                 |
| Supercontig_1.104_MV<br>LG_06197_10sp | -802,87206 | -802,2386  | 1,26692 | 0,46925 | NS | 0 | 0 | 0 | 0 | 0 | hypothetical protein                          | NA         | NA                                                                            |
| Supercontig_1.3_MVL<br>G_00558_10sp   | -386,40859 | -386,36769 | 0,0818  | 0,04007 | NS | 0 | 0 | 0 | 0 | 0 | hypothetical protein                          | PF03151.9  | TPT(Triose-phosphate Transporter family)                                      |

|                                       |            |            |         |         |    |   |   |   |   |   |                                         |            |                                                                      |
|---------------------------------------|------------|------------|---------|---------|----|---|---|---|---|---|-----------------------------------------|------------|----------------------------------------------------------------------|
| Supercontig_1.10_MV<br>LG_01633_10sp  | -350,39544 | -350,39536 | 0,00016 | 0       | NS | 0 | □ | □ | □ | □ | gluconate 5-<br>dehydrogenase           | PF00106.18 | adh_short(short chain<br>dehydrogenase)                              |
| Supercontig_1.73_MV<br>LG_05419_8sp   | -759,66339 | -759,66304 | 0,00007 | 0,00035 | NS | 0 | □ | □ | □ | □ | hypothetical protein                    | NA         | NA                                                                   |
| Supercontig_1.63_MV<br>LG_05082_7sp   | -1099,814  | -1099,814  | 0       | 0       | NS | 0 | □ | □ | □ | □ | hypothetical protein                    | PF00150.11 | Cellulase(Cellulase (glycosyl<br>hydrolase family 5))                |
| Supercontig_1.58_MV<br>LG_04857_10sp  | -415,95671 | -415,31275 | 1,28792 | 0,47479 | NS | 0 | □ | □ | □ | □ | hypothetical protein                    | PF04892.5  | VanZ(VanZ like family)                                               |
| Supercontig_1.142_MV<br>LG_06709_10sp | -391,6603  | -391,65989 | 0,00082 | 0,00041 | NS | 0 | □ | □ | □ | □ | CAMK protein kinase                     | PF07714.10 | Pkinase_Tyr(Protein tyrosine<br>kinase)                              |
| Supercontig_1.41_MV<br>LG_04016_7sp   | -327,65652 | -327,65605 | 0,00094 | 0,00047 | NS | 0 | □ | □ | □ | □ | large subunit<br>ribosomal protein L31e | PF01198.12 | Ribosomal_L31e(Ribosomal<br>protein L31e)                            |
| Supercontig_1.7_MVL<br>G_01306_7sp    | -784,09145 | -784,09118 | 0,00054 | 0,00027 | NS | 0 | □ | □ | □ | □ | hypothetical protein                    | PF07690.9  | MFS_1(Major Facilitator<br>Superfamily)                              |
| Supercontig_1.14_MV<br>LG_02021_8sp   | -949,562   | -949,48101 | 0,16198 | 0,0778  | NS | 0 | □ | □ | □ | □ | hypothetical protein                    | PF00172.11 | Zn_clus(Fungal Zn(2)-Cys(6)<br>binuclear cluster domain)             |
| Supercontig_1.49_MV<br>LG_04426_8sp   | -418,34621 | -418,34621 | 0       | 0       | NS | 0 | □ | □ | □ | □ | hypothetical protein                    | PF05328.5  | CybS(CybS)                                                           |
| Supercontig_1.33_MV<br>LG_03447_7sp   | -741,29449 | -741,29449 | 0       | 0       | NS | 0 | □ | □ | □ | □ | hypothetical protein                    | NA         | NA                                                                   |
| Supercontig_1.50_MV<br>LG_04480_8sp   | -688,40932 | -686,27975 | 4,25914 | 0,88111 | NS | 0 | □ | □ | □ | □ | hypothetical protein                    | NA         | NA                                                                   |
| Supercontig_1.94_MV<br>LG_05991_11sp  | -285,83638 | -285,83626 | 0,00024 | 0,00012 | NS | 0 | □ | □ | □ | □ | hypothetical protein                    | PF00076.15 | RRM_1(RNA recognition motif.<br>(a.k.a. RRM, RBD, or RNP<br>domain)) |
| Supercontig_1.14_MV<br>LG_02045_8sp   | -384,25639 | -384,25639 | 0       | 0       | NS | 0 | □ | □ | □ | □ | hypothetical protein                    | NA         | NA                                                                   |
| Supercontig_1.63_MV<br>LG_05076_7sp   | -595,78929 | -595,61522 | 0,34814 | 0,15976 | NS | 0 | □ | □ | □ | □ | hypothetical protein                    | PF04193.7  | PQ-loop(PQ loop repeat)                                              |
| Supercontig_1.203_MV<br>LG_07097_6sp  | -476,79096 | -476,79096 | 0       | 0       | NS | 0 | □ | □ | □ | □ | hypothetical protein                    | PF01557.11 | FAA_hydrolase(Fumarylacetoac<br>etate (FAA) hydrolase family)        |
| Supercontig_1.6_MVL<br>G_01209_10sp   | -582,93888 | -582,5039  | 0,86996 | 0,35272 | NS | 0 | □ | □ | □ | □ | hypothetical protein                    | PF04828.7  | GFA(Glutathione-dependent<br>formaldehyde-activating enzyme)         |
| Supercontig_1.14_MV<br>LG_02009_8sp   | -1050,9468 | -1049,7001 | 2,49338 | 0,71255 | NS | 0 | □ | □ | □ | □ | hypothetical protein                    | PF00320.20 | GATA(GATA zinc finger)                                               |
| Supercontig_1.83_MV<br>LG_05737_10sp  | -506,73873 | -505,242   | 2,99346 | 0,77614 | NS | 0 | □ | □ | □ | □ | hypothetical protein                    | PF00704.21 | Glyco_hydro_18(Glycosyl<br>hydrolases family 18)                     |
| Supercontig_1.18_MV<br>LG_02376_10sp  | -608,13279 | -608,13279 | 0       | 0       | NS | 0 | □ | □ | □ | □ | hypothetical protein                    | PF00755.13 | Carn_acyltransf(Choline/Carnitin<br>e o-acyltransferase)             |
| Supercontig_1.56_MV<br>LG_04758_7sp   | -580,25388 | -580,25388 | 0       | 0       | NS | 0 | □ | □ | □ | □ | hypothetical protein                    | PF09783.2  | Vac_ImportDeg(Vacuolar import<br>and degradation protein)            |
| Supercontig_1.121_MV<br>LG_06432_9sp  | -786,52203 | -786,50887 | 0,02632 | 0,01307 | NS | 0 | □ | □ | □ | □ | hypothetical protein                    | PF07690.9  | MFS_1(Major Facilitator<br>Superfamily)                              |
| Supercontig_1.3_MVL<br>G_00650_11sp   | -910,96049 | -910,96044 | 0,0001  | 0       | NS | 0 | □ | □ | □ | □ | hypothetical protein                    | TIGR00800  | TIGR00800(ncs1: NCS1<br>nucleoside transporter family)               |
| Supercontig_1.42_MV<br>LG_04081_10sp  | -354,17278 | -354,17278 | 0       | 0       | NS | 0 | □ | □ | □ | □ | hypothetical protein                    | TIGR03188  | TIGR03188(histidine_his1:<br>phosphoribosyl-ATP<br>diphosphatase)    |

|                                       |            |            |         |         |    |   |   |   |   |   |   |   |   |   |   |   |   |   |   |   |                                                                         |            |                                                               |
|---------------------------------------|------------|------------|---------|---------|----|---|---|---|---|---|---|---|---|---|---|---|---|---|---|---|-------------------------------------------------------------------------|------------|---------------------------------------------------------------|
| Supercontig_1.22_MV<br>LG_02711_9sp   | -797,65428 | -797,65428 | 0       | 0       | NS | 0 | 0 | 0 | 0 | 0 | 0 | 0 | 0 | 0 | 0 | 0 | 0 | 0 | 0 | 0 | hypothetical protein                                                    | PF00400.25 | WD40(WD domain, G-beta repeat)                                |
| Supercontig_1.29_MV<br>LG_03214_8sp   | -1109,2488 | -1108,3215 | 1,8547  | 0,6044  | NS | 0 | 0 | 0 | 0 | 0 | 0 | 0 | 0 | 0 | 0 | 0 | 0 | 0 | 0 | 0 | hypothetical protein                                                    | PF09431.3  | DUF2013(Protein of unknown function (DUF2013))                |
| Supercontig_1.73_MV<br>LG_05429_12sp  | -549,12479 | -548,90106 | 0,44746 | 0,20047 | NS | 0 | 0 | 0 | 0 | 0 | 0 | 0 | 0 | 0 | 0 | 0 | 0 | 0 | 0 | 0 | hypothetical protein                                                    | NA         | NA                                                            |
| Supercontig_1.22_MV<br>LG_02740_11sp  | -508,28667 | -508,28667 | 0       | 0       | NS | 0 | 0 | 0 | 0 | 0 | 0 | 0 | 0 | 0 | 0 | 0 | 0 | 0 | 0 | 0 | hypothetical protein                                                    | PF00797.10 | Acetyltransf_2(N-acetyltransferase)                           |
| Supercontig_1.10_MV<br>LG_01680_11sp  | -794,64771 | -794,46766 | 0,3601  | 0,16477 | NS | 0 | 0 | 0 | 0 | 0 | 0 | 0 | 0 | 0 | 0 | 0 | 0 | 0 | 0 | 0 | hypothetical protein                                                    | PF04153.11 | NOT2_3_5(NOT2 / NOT3 / NOT5 family)                           |
| Supercontig_1.261_MV<br>LG_07219_7sp  | -386,36857 | -385,23541 | 2,26632 | 0,67799 | NS | 0 | 0 | 0 | 0 | 0 | 0 | 0 | 0 | 0 | 0 | 0 | 0 | 0 | 0 | 0 | hypothetical protein                                                    | NA         | NA                                                            |
| Supercontig_1.56_MV<br>LG_04789_7sp   | -677,99041 | -677,98999 | 0,00084 | 0,00042 | NS | 0 | 0 | 0 | 0 | 0 | 0 | 0 | 0 | 0 | 0 | 0 | 0 | 0 | 0 | 0 | hypothetical protein                                                    | PF00657.15 | Lipase_GDSL(GDSL-like Lipase/Acylhydrolase)                   |
| Supercontig_1.6_MVL<br>G_01195_7sp    | -841,22053 | -839,6202  | 3,20066 | 0,79817 | NS | 0 | 0 | 0 | 0 | 0 | 0 | 0 | 0 | 0 | 0 | 0 | 0 | 0 | 0 | 0 | hypothetical protein                                                    | PF07986.5  | TBCC(Tubulin binding cofactor C)                              |
| Supercontig_1.32_MV<br>LG_03422_9sp   | -1096,817  | -1096,817  | 0       | 0       | NS | 0 | 0 | 0 | 0 | 0 | 0 | 0 | 0 | 0 | 0 | 0 | 0 | 0 | 0 | 0 | hypothetical protein                                                    | PF00566.11 | TBC(TBC domain)                                               |
| Supercontig_1.69_MV<br>LG_05299_8sp   | -348,91197 | -348,91188 | 0,00018 | 0       | NS | 0 | 0 | 0 | 0 | 0 | 0 | 0 | 0 | 0 | 0 | 0 | 0 | 0 | 0 | 0 | vesicle-associated membrane protein 7                                   | PF00957.14 | Synaptobrevin(Synaptobrevin)                                  |
| Supercontig_1.56_MV<br>LG_04783_7sp   | -513,38923 | -513,38923 | 0       | 0       | NS | 0 | 0 | 0 | 0 | 0 | 0 | 0 | 0 | 0 | 0 | 0 | 0 | 0 | 0 | 0 | hypothetical protein                                                    | NA         | NA                                                            |
| Supercontig_1.4_MVL<br>G_00797_6sp    | -349,7907  | -349,79035 | 0,0007  | 0,00035 | NS | 0 | 0 | 0 | 0 | 0 | 0 | 0 | 0 | 0 | 0 | 0 | 0 | 0 | 0 | 0 | proteasome subunit alpha type-6                                         | PF00227.19 | Proteasome(Proteasome subunit)                                |
| Supercontig_1.30_MV<br>LG_03261_7sp   | -944,59007 | -944,59007 | 0       | 0       | NS | 0 | 0 | 0 | 0 | 0 | 0 | 0 | 0 | 0 | 0 | 0 | 0 | 0 | 0 | 0 | hypothetical protein                                                    | PF07575.6  | Nucleopor_Nup85(Nup85 Nucleoporin)                            |
| Supercontig_1.6_MVL<br>G_01062_7sp    | -903,84243 | -903,84243 | 0       | 0       | NS | 0 | 0 | 0 | 0 | 0 | 0 | 0 | 0 | 0 | 0 | 0 | 0 | 0 | 0 | 0 | hypothetical protein                                                    | PF03062.12 | MBOAT(MBOAT family)                                           |
| Supercontig_1.154_MV<br>LG_06804_11sp | -545,84598 | -545,84598 | 0       | 0       | NS | 0 | 0 | 0 | 0 | 0 | 0 | 0 | 0 | 0 | 0 | 0 | 0 | 0 | 0 | 0 | hypothetical protein                                                    | PF02225.15 | PA(PA domain)                                                 |
| Supercontig_1.58_MV<br>LG_04844_8sp   | -581,27344 | -581,08648 | 0,37392 | 0,17052 | NS | 0 | 0 | 0 | 0 | 0 | 0 | 0 | 0 | 0 | 0 | 0 | 0 | 0 | 0 | 0 | hypothetical protein                                                    | PF06179.5  | Med22(Surfeit locus protein 5 subunit 22 of Mediator complex) |
| Supercontig_1.16_MV<br>LG_02251_10sp  | -351,14486 | -351,1445  | 0,00072 | 0,00036 | NS | 0 | 0 | 0 | 0 | 0 | 0 | 0 | 0 | 0 | 0 | 0 | 0 | 0 | 0 | 0 | protein transporter SEC23                                               | PF08033.5  | Sec23_BS(Sec23/Sec24 beta-sandwich domain)                    |
| Supercontig_1.211_MV<br>LG_07125_8sp  | -765,16052 | -764,4923  | 1,33644 | 0,48738 | NS | 0 | 0 | 0 | 0 | 0 | 0 | 0 | 0 | 0 | 0 | 0 | 0 | 0 | 0 | 0 | hypothetical protein                                                    | PF03798.9  | TRAM_LAG1_CLN8(TLC domain)                                    |
| Supercontig_1.8_MVL<br>G_01423_8sp    | -918,88514 | -918,88514 | 0       | 0       | NS | 0 | 0 | 0 | 0 | 0 | 0 | 0 | 0 | 0 | 0 | 0 | 0 | 0 | 0 | 0 | leucyl-tRNA synthetase, cytoplasmic                                     | PF01406.12 | tRNA-synt_1e(tRNA synthetases class I (C) catalytic domain)   |
| Supercontig_1.47_MV<br>LG_04319_9sp   | -1276,2478 | -1276,1298 | 0,23604 | 0,11132 | NS | 0 | 0 | 0 | 0 | 0 | 0 | 0 | 0 | 0 | 0 | 0 | 0 | 0 | 0 | 0 | hypothetical protein                                                    | PF00400.25 | WD40(WD domain, G-beta repeat)                                |
| Supercontig_1.9_MVL<br>G_01515_10sp   | -387,58677 | -387,58677 | 0       | 0       | NS | 0 | 0 | 0 | 0 | 0 | 0 | 0 | 0 | 0 | 0 | 0 | 0 | 0 | 0 | 0 | hypothetical protein                                                    | PF01399.20 | PCI(PCI domain)                                               |
| Supercontig_1.52_MV<br>LG_04580_8sp   | -498,82903 | -498,82903 | 0       | 0       | NS | 0 | 0 | 0 | 0 | 0 | 0 | 0 | 0 | 0 | 0 | 0 | 0 | 0 | 0 | 0 | hypothetical protein                                                    | PF00293.21 | NUDIX(NUDIX domain)                                           |
| Supercontig_1.4_MVL<br>G_00872_6sp    | -572,5108  | -572,13181 | 0,75798 | 0,31545 | NS | 0 | 0 | 0 | 0 | 0 | 0 | 0 | 0 | 0 | 0 | 0 | 0 | 0 | 0 | 0 | pyruvate dehydrogenase E2 component (dihydroipoamide acetyltransferase) | PF00364.15 | Biotin_lipoyl(Biotin-requiring enzyme)                        |

|                                       |            |            |         |         |    |   |   |   |   |   |                                            |            |                                                                         |
|---------------------------------------|------------|------------|---------|---------|----|---|---|---|---|---|--------------------------------------------|------------|-------------------------------------------------------------------------|
| Supercontig_1.77_MV<br>LG_05568_12sp  | -335,88267 | -335,52892 | 0,7075  | 0,29795 | NS | 0 | 0 | 0 | 0 | 0 | hypothetical protein                       | NA         | NA                                                                      |
| Supercontig_1.53_MV<br>LG_04618_7sp   | -1440,1036 | -1439,5207 | 1,1658  | 0,44172 | NS | 0 | 0 | 0 | 0 | 0 | hypothetical protein                       | PF01746.14 | tRNA_m1G_MT(tRNA (Guanine-1)-methyltransferase)                         |
| Supercontig_1.8_MVL<br>G_01442_6sp    | -387,09066 | -387,09066 | 0       | 0       | NS | 0 | 0 | 0 | 0 | 0 | hypothetical protein                       | NA         | NA                                                                      |
| Supercontig_1.63_MV<br>LG_05072_11sp  | -523,5545  | -523,5545  | 0       | 0       | NS | 0 | 0 | 0 | 0 | 0 | hypothetical protein                       | PF00498.19 | FHA(FHA domain)                                                         |
| Supercontig_1.25_MV<br>LG_02980_9sp   | -688,3133  | -688,31307 | 0,00046 | 0,00023 | NS | 0 | 0 | 0 | 0 | 0 | hypothetical protein                       | TIGR00800  | TIGR00800(ncs1: NCS1 nucleoside transporter family)                     |
| Supercontig_1.15_MV<br>LG_02084_9sp   | -333,3519  | -333,35181 | 0,00018 | 0       | NS | 0 | 0 | 0 | 0 | 0 | hypothetical protein                       | NA         | NA                                                                      |
| Supercontig_1.74_MV<br>LG_05469_10sp  | -1198,5224 | -1198,1494 | 0,74614 | 0,31138 | NS | 0 | 0 | 0 | 0 | 0 | hypothetical protein                       | NA         | NA                                                                      |
| Supercontig_1.1_MVL<br>G_00233_9sp    | -631,28873 | -631,28873 | 0       | 0       | NS | 0 | 0 | 0 | 0 | 0 | hypothetical protein                       | PF05653.7  | DUF803(Protein of unknown function (DUF803))                            |
| Supercontig_1.11_MV<br>LG_01753_11sp  | -490,88316 | -490,8831  | 0,00012 | 0       | NS | 0 | 0 | 0 | 0 | 0 | hypothetical protein                       | PF08231.5  | SYF2(SYF2 splicing factor)                                              |
| Supercontig_1.102_MV<br>LG_06178_10sp | -521,40747 | -520,42591 | 1,96312 | 0,62527 | NS | 0 | 0 | 0 | 0 | 0 | hypothetical protein                       | PF00790.12 | VHS(VHS domain)                                                         |
| Supercontig_1.30_MV<br>LG_03286_9sp   | -594,00004 | -594,00004 | 0       | 0       | NS | 0 | 0 | 0 | 0 | 0 | hypothetical protein                       | PF00128.17 | Alpha-amylase(Alpha amylase, catalytic domain)                          |
| Supercontig_1.5_MVL<br>G_00992_8sp    | -1030,9669 | -1030,9645 | 0,0049  | 0,00245 | NS | 0 | 0 | 0 | 0 | 0 | hypothetical protein                       | NA         | NA                                                                      |
| Supercontig_1.17_MV<br>LG_02279_8sp   | -444,19818 | -443,8927  | 0,61096 | 0,26323 | NS | 0 | 0 | 0 | 0 | 0 | hypothetical protein                       | NA         | NA                                                                      |
| Supercontig_1.68_MV<br>LG_05269_7sp   | -503,60496 | -503,60483 | 0,00026 | 0,00013 | NS | 0 | 0 | 0 | 0 | 0 | peptidyl-prolyl cis-trans isomerase-like 1 | PF00160.14 | Pro_isomerase(Cyclophilin type peptidyl-prolyl cis-trans isomerase/CLD) |
| Supercontig_1.5_MVL<br>G_00907_10sp   | -790,84605 | -790,8459  | 0,0003  | 0,00015 | NS | 0 | 0 | 0 | 0 | 0 | hypothetical protein                       | PF08145.5  | BOP1NT(BOP1NT (NUC169) domain)                                          |
| Supercontig_1.27_MV<br>LG_03096_10sp  | -638,20704 | -638,20704 | 0       | 0       | NS | 0 | 0 | 0 | 0 | 0 | hypothetical protein                       | NA         | NA                                                                      |
| Supercontig_1.101_MV<br>LG_06156_10sp | -475,38006 | -475,38004 | 0       | 0       | NS | 0 | 0 | 0 | 0 | 0 | hypothetical protein                       | PF10277.2  | Frag1(Frag1/DRAM/Sfk1 family)                                           |
| Supercontig_1.62_MV<br>LG_05017_6sp   | -1457,5575 | -1457,5575 | 0       | 0       | NS | 0 | 0 | 0 | 0 | 0 | hypothetical protein                       | PF08760.4  | DUF1793(Domain of unknown function (DUF1793))                           |
| Supercontig_1.10_MV<br>LG_01627_7sp   | -314,40284 | -314,40281 | 0       | 0       | NS | 0 | 0 | 0 | 0 | 0 | hypothetical protein                       | PF03911.9  | Sec61_beta(Sec61beta family)                                            |
| Supercontig_1.4_MVL<br>G_00731_9sp    | -432,94288 | -431,22397 | 3,43782 | 0,82074 | NS | 0 | 0 | 0 | 0 | 0 | hypothetical protein                       | PF00581.13 | Rhodanese(Rhodanese-like domain)                                        |
| Supercontig_1.4_MVL<br>G_00840_9sp    | -896,49243 | -896,49194 | 0,00098 | 0,00049 | NS | 0 | 0 | 0 | 0 | 0 | hypothetical protein                       | PF03171.13 | 2OG-FeII_Oxy(2OG-Fe(II) oxygenase superfamily)                          |
| Supercontig_1.26_MV<br>LG_03005_8sp   | -835,54958 | -835,53814 | 0,02288 | 0,01137 | NS | 0 | 0 | 0 | 0 | 0 | hypothetical protein                       | PF08700.4  | Vps51(Vps51/Vps67)                                                      |
| Supercontig_1.27_MV<br>LG_03119_12sp  | -424,81739 | -424,81739 | 0       | 0       | NS | 0 | 0 | 0 | 0 | 0 | hypothetical protein                       | NA         | NA                                                                      |
| Supercontig_1.20_MV<br>LG_02522_7sp   | -751,30792 | -750,84468 | 0,92648 | 0,37076 | NS | 0 | 0 | 0 | 0 | 0 | hypothetical protein                       | NA         | NA                                                                      |
| Supercontig_1.51_MV<br>LG_04534_8sp   | -1288,8379 | -1287,4043 | 2,8672  | 0,76155 | NS | 0 | 0 | 0 | 0 | 0 | hypothetical protein                       | PF10513.2  | EPL1(Enhancer of polycomb-like)                                         |



|                                      |            |            |         |         |    |   |  |  |  |  |                                                     |            |                                                        |
|--------------------------------------|------------|------------|---------|---------|----|---|--|--|--|--|-----------------------------------------------------|------------|--------------------------------------------------------|
| Supercontig_1.61_MV<br>LG_04966_10sp | -774,37564 | -774,37564 | 0       | 0       | NS | 0 |  |  |  |  | hypothetical protein                                | PF04116.6  | FA_hydroxylase(Fatty acid hydroxylase superfamily)     |
| Supercontig_1.41_MV<br>LG_04020_6sp  | -1176,385  | -1176,385  | 0       | 0       | NS | 0 |  |  |  |  | hypothetical protein                                | PF00581.13 | Rhodanese(Rhodanese-like domain)                       |
| Supercontig_1.3_MVL<br>G_00608_6sp   | -296,71375 | -296,71369 | 0,00012 | 0       | NS | 0 |  |  |  |  | NADH dehydrogenase (ubiquinone) 1 beta subcomplex 9 | PF05347.8  | Complex1_LYR(Complex 1 protein (LYR family))           |
| Supercontig_1.11_MV<br>LG_01751_8sp  | -462,23673 | -462,23666 | 0,00014 | 0,00316 | NS | 0 |  |  |  |  | hypothetical protein                                | PF00153.20 | Mito_carr(Mitochondrial carrier protein)               |
| Supercontig_1.20_MV<br>LG_02556_10sp | -622,8224  | -622,78661 | 0,07158 | 0,03516 | NS | 0 |  |  |  |  | hypothetical protein                                | PF01593.17 | Amino_oxidase(Flavin containing amine oxidoreductase)  |
| Supercontig_1.3_MVL<br>G_00526_12sp  | -793,4603  | -793,4603  | 0       | 0       | NS | 0 |  |  |  |  | nucleolar protein 56                                | PF08156.6  | NOP5NT(NOP5NT (NUC127) domain)                         |
| Supercontig_1.12_MV<br>LG_01810_7sp  | -1480,283  | -1480,2069 | 0,15214 | 0,07325 | NS | 0 |  |  |  |  | hypothetical protein                                | PF00176.16 | SNF2_N(SNF2 family N-terminal domain)                  |
| Supercontig_1.1_MVL<br>G_00148_8sp   | -464,24593 | -464,24593 | 0       | 0       | NS | 0 |  |  |  |  | hypothetical protein                                | NA         | NA                                                     |
| Supercontig_1.10_MV<br>LG_01645_7sp  | -425,44235 | -425,30416 | 0,27638 | 0,12907 | NS | 0 |  |  |  |  | hypothetical protein                                | PF05383.10 | La(La domain)                                          |
| Supercontig_1.6_MVL<br>G_01088_7sp   | -469,55646 | -469,31737 | 0,47818 | 0,21266 | NS | 0 |  |  |  |  | hypothetical protein                                | NA         | NA                                                     |
| Supercontig_1.44_MV<br>LG_04148_8sp  | -486,52324 | -486,52313 | 0,00022 | 0,00011 | NS | 0 |  |  |  |  | mps one binder kinase activator-like 1B             | PF03637.10 | Mob1_phocein(Mob1/phocein family)                      |
| Supercontig_1.5_MVL<br>G_00957_10sp  | -562,66334 | -562,66334 | 0       | 0       | NS | 0 |  |  |  |  | hypothetical protein                                | PF00096.19 | zf-C2H2(Zinc finger, C2H2 type)                        |
| Supercontig_1.51_MV<br>LG_04509_11sp | -304,50468 | -304,50466 | 0,00316 | 0,00316 | NS | 0 |  |  |  |  | hypothetical protein                                | PF02936.7  | COX4(Cytochrome c oxidase subunit IV)                  |
| Supercontig_1.12_MV<br>LG_01874_9sp  | -716,71184 | -716,71184 | 0       | 0       | NS | 0 |  |  |  |  | hypothetical protein                                | NA         | NA                                                     |
| Supercontig_1.6_MVL<br>G_01155_11sp  | -1868,2224 | -1867,3729 | 1,69912 | 0,5724  | NS | 0 |  |  |  |  | hypothetical protein                                | PF00501.21 | AMP-binding(AMP-binding enzyme)                        |
| Supercontig_1.53_MV<br>LG_04609_12sp | -540,47592 | -540,15899 | 0,63386 | 0,27162 | NS | 0 |  |  |  |  | hypothetical protein                                | PF03914.10 | CBF(CBF/Mak21 family)                                  |
| Supercontig_1.52_MV<br>LG_04593_6sp  | -378,59355 | -378,59354 | 0,00316 | 0,00316 | NS | 0 |  |  |  |  | hypothetical protein                                | NA         | NA                                                     |
| Supercontig_1.21_MV<br>LG_02677_11sp | -534,46234 | -534,4623  | 0,00316 | 0,00316 | NS | 0 |  |  |  |  | haloacid dehalogenase, type II                      | TIGR01428  | TIGR01428(HAD_type_II: haloacid dehalogenase, type II) |
| Supercontig_1.27_MV<br>LG_03063_10sp | -955,68064 | -955,64825 | 0,06478 | 0,03187 | NS | 0 |  |  |  |  | hypothetical protein                                | PF00270.22 | DEAD(DEAD/DEAH box helicase)                           |
| Supercontig_1.10_MV<br>LG_01588_6sp  | -703,93096 | -703,93096 | 0       | 0       | NS | 0 |  |  |  |  | hypothetical protein                                | NA         | NA                                                     |
| Supercontig_1.7_MVL<br>G_01259_9sp   | -490,35552 | -490,35552 | 0       | 0       | NS | 0 |  |  |  |  | hypothetical protein                                | TIGR00101  | TIGR00101(ureG: urease accessory protein UreG)         |
| Supercontig_1.4_MVL<br>G_00825_9sp   | -905,52091 | -905,52091 | 0       | 0       | NS | 0 |  |  |  |  | hypothetical protein                                | PF00134.16 | Cyclin_N(Cyclin, N-terminal domain)                    |
| Supercontig_1.13_MV<br>LG_01940_6sp  | -968,71392 | -968,43426 | 0,55932 | 0,24396 | NS | 0 |  |  |  |  | hypothetical protein                                | NA         | NA                                                     |

|                                      |            |            |         |         |    |   |   |   |   |   |   |   |   |   |   |   |   |   |   |   |                                                       |            |                                                                |
|--------------------------------------|------------|------------|---------|---------|----|---|---|---|---|---|---|---|---|---|---|---|---|---|---|---|-------------------------------------------------------|------------|----------------------------------------------------------------|
| Supercontig_1.39_MV<br>LG_03876_7sp  | -735,34632 | -735,34632 | 0       | 0       | NS | 0 | 0 | 0 | 0 | 0 | 0 | 0 | 0 | 0 | 0 | 0 | 0 | 0 | 0 | 0 | hypothetical protein                                  | PF03144.18 | GTP_EFTU_D2(Elongation factor Tu domain 2)                     |
| Supercontig_1.139_MV<br>LG_06668_7sp | -1009,6956 | -1009,6956 | 0       | 0       | NS | 0 | 0 | 0 | 0 | 0 | 0 | 0 | 0 | 0 | 0 | 0 | 0 | 0 | 0 | 0 | hypothetical protein                                  | PF03399.9  | SAC3_GANP(SAC3/GANP/Nin1/mts3/elf-3 p25 family)                |
| Supercontig_1.32_MV<br>LG_03423_9sp  | -746,42587 | -746,42579 | 0,00316 | 0,00316 | NS | 0 | 0 | 0 | 0 | 0 | 0 | 0 | 0 | 0 | 0 | 0 | 0 | 0 | 0 | 0 | hypothetical protein                                  | PF00501.21 | AMP-binding(AMP-binding enzyme)                                |
| Supercontig_1.25_MV<br>LG_02924_10sp | -388,12057 | -388,12052 | 0,00316 | 0,00316 | NS | 0 | 0 | 0 | 0 | 0 | 0 | 0 | 0 | 0 | 0 | 0 | 0 | 0 | 0 | 0 | hypothetical protein                                  | PF00246.17 | Peptidase_M14(Zinc carboxypeptidase)                           |
| Supercontig_1.7_MVL<br>G_01287_10sp  | -503,99443 | -503,99443 | 0       | 0       | NS | 0 | 0 | 0 | 0 | 0 | 0 | 0 | 0 | 0 | 0 | 0 | 0 | 0 | 0 | 0 | hypothetical protein                                  | PF03254.6  | XG_FTase(Xyloglucan fucosyltransferase)                        |
| Supercontig_1.39_MV<br>LG_03893_9sp  | -265,5329  | -264,97927 | 1,10726 | 0,42514 | NS | 0 | 0 | 0 | 0 | 0 | 0 | 0 | 0 | 0 | 0 | 0 | 0 | 0 | 0 | 0 | hypothetical protein                                  | NA         | NA                                                             |
| Supercontig_1.17_MV<br>LG_02342_9sp  | -779,00456 | -779,00456 | 0       | 0       | NS | 0 | 0 | 0 | 0 | 0 | 0 | 0 | 0 | 0 | 0 | 0 | 0 | 0 | 0 | 0 | hypothetical protein                                  | PF00098.16 | zf-CCHC(Zinc knuckle)                                          |
| Supercontig_1.20_MV<br>LG_02559_10sp | -401,78422 | -401,77512 | 0,0182  | 0,00906 | NS | 0 | 0 | 0 | 0 | 0 | 0 | 0 | 0 | 0 | 0 | 0 | 0 | 0 | 0 | 0 | hypothetical protein                                  | PF00076.15 | RRM_1(RNA recognition motif. (a.k.a. RRM, RBD, or RNP domain)) |
| Supercontig_1.51_MV<br>LG_04526_9sp  | -393,39707 | -393,39692 | 0,0003  | 0,00015 | NS | 0 | 0 | 0 | 0 | 0 | 0 | 0 | 0 | 0 | 0 | 0 | 0 | 0 | 0 | 0 | hypothetical protein                                  | PF03901.10 | Glyco_transf_22(Alg9-like mannosyltransferase family)          |
| Supercontig_1.149_MV<br>LG_06767_9sp | -382,38996 | -382,38996 | 0       | 0       | NS | 0 | 0 | 0 | 0 | 0 | 0 | 0 | 0 | 0 | 0 | 0 | 0 | 0 | 0 | 0 | hypothetical protein                                  | PF05022.5  | SRP40_C(SRP40, C-terminal domain)                              |
| Supercontig_1.28_MV<br>LG_03204_7sp  | -1377,3377 | -1377,3377 | 0       | 0       | NS | 0 | 0 | 0 | 0 | 0 | 0 | 0 | 0 | 0 | 0 | 0 | 0 | 0 | 0 | 0 | hypothetical protein                                  | PF08573.3  | SAE2(DNA repair protein endonuclease SAE2/CtIP C-terminus)     |
| Supercontig_1.5_MVL<br>G_00981_9sp   | -645,71163 | -645,71159 | 0,00316 | 0,00316 | NS | 0 | 0 | 0 | 0 | 0 | 0 | 0 | 0 | 0 | 0 | 0 | 0 | 0 | 0 | 0 | hypothetical protein                                  | TIGR00296  | TIGR00296(TIGR00296: uncharacterized protein, PH0010 family)   |
| Supercontig_1.36_MV<br>LG_03699_7sp  | -785,4525  | -785,45072 | 0,00356 | 0,00178 | NS | 0 | 0 | 0 | 0 | 0 | 0 | 0 | 0 | 0 | 0 | 0 | 0 | 0 | 0 | 0 | hypothetical protein                                  | PF00172.11 | Zn_clus(Fungal Zn(2)-Cys(6) binuclear cluster domain)          |
| Supercontig_1.121_MV<br>LG_06431_6sp | -1383,4459 | -1382,8303 | 1,2312  | 0,45968 | NS | 0 | 0 | 0 | 0 | 0 | 0 | 0 | 0 | 0 | 0 | 0 | 0 | 0 | 0 | 0 | hypothetical protein                                  | NA         | NA                                                             |
| Supercontig_1.76_MV<br>LG_05539_8sp  | -654,33779 | -653,87637 | 0,92284 | 0,36961 | NS | 0 | 0 | 0 | 0 | 0 | 0 | 0 | 0 | 0 | 0 | 0 | 0 | 0 | 0 | 0 | hypothetical protein                                  | PF03151.9  | TPT(Triose-phosphate Transporter family)                       |
| Supercontig_1.39_MV<br>LG_03891_6sp  | -816,61426 | -815,35573 | 2,51706 | 0,71593 | NS | 0 | 0 | 0 | 0 | 0 | 0 | 0 | 0 | 0 | 0 | 0 | 0 | 0 | 0 | 0 | hypothetical protein                                  | NA         | NA                                                             |
| Supercontig_1.53_MV<br>LG_04645_6sp  | -1210,0856 | -1210,0856 | 0       | 0       | NS | 0 | 0 | 0 | 0 | 0 | 0 | 0 | 0 | 0 | 0 | 0 | 0 | 0 | 0 | 0 | STE/STE7/MEK1 protein kinase                          | PF07714.10 | Pkinase_Tyr(Protein tyrosine kinase)                           |
| Supercontig_1.18_MV<br>LG_02411_12sp | -689,11181 | -689,11181 | 0       | 0       | NS | 0 | 0 | 0 | 0 | 0 | 0 | 0 | 0 | 0 | 0 | 0 | 0 | 0 | 0 | 0 | hypothetical protein                                  | PF00153.20 | Mito_carr(Mitochondrial carrier protein)                       |
| Supercontig_1.220_MV<br>LG_07156_7sp | -789,99326 | -789,99269 | 0,00114 | 0,00057 | NS | 0 | 0 | 0 | 0 | 0 | 0 | 0 | 0 | 0 | 0 | 0 | 0 | 0 | 0 | 0 | AGC/AKT protein kinase                                | PF07714.10 | Pkinase_Tyr(Protein tyrosine kinase)                           |
| Supercontig_1.161_MV<br>LG_06863_7sp | -421,97012 | -421,97012 | 0       | 0       | NS | 0 | 0 | 0 | 0 | 0 | 0 | 0 | 0 | 0 | 0 | 0 | 0 | 0 | 0 | 0 | hypothetical protein                                  | PF04855.5  | SNF5(SNF5 / SMARCB1 / INI1)                                    |
| Supercontig_1.23_MV<br>LG_02770_9sp  | -696,36586 | -695,67661 | 1,3785  | 0,49805 | NS | 0 | 0 | 0 | 0 | 0 | 0 | 0 | 0 | 0 | 0 | 0 | 0 | 0 | 0 | 0 | hypothetical protein                                  | PF00107.19 | ADH_zinc_N(Zinc-binding dehydrogenase)                         |
| Supercontig_1.20_MV<br>LG_02526_7sp  | -503,67212 | -503,67211 | 0,00316 | 0,00316 | NS | 0 | 0 | 0 | 0 | 0 | 0 | 0 | 0 | 0 | 0 | 0 | 0 | 0 | 0 | 0 | hypothetical protein                                  | PF07970.5  | COP1coated_ERV(Endoplasmic reticulum vesicle transporter)      |
| Supercontig_1.36_MV<br>LG_03693_10sp | -495,98788 | -495,9877  | 0,00036 | 0,00018 | NS | 0 | 0 | 0 | 0 | 0 | 0 | 0 | 0 | 0 | 0 | 0 | 0 | 0 | 0 | 0 | methymlalonate-semialdehyde dehydrogenase [acylating] | PF00171.15 | Aldedh(Aldehyde dehydrogenase family)                          |

|                                       |            |            |         |         |    |   |  |  |  |                                                         |            |                                                                              |
|---------------------------------------|------------|------------|---------|---------|----|---|--|--|--|---------------------------------------------------------|------------|------------------------------------------------------------------------------|
| Supercontig_1.38_MV<br>LG_03784_11sp  | -284,74887 | -285,53449 | 0       | 0       | NS | 0 |  |  |  | hypothetical protein                                    | PF01556.11 | DnaJ_C(DnaJ C terminal region)                                               |
| Supercontig_1.7_MVL<br>G_01253_8sp    | -414,99471 | -414,66799 | 0,65344 | 0,27871 | NS | 0 |  |  |  | hypothetical protein                                    | NA         | NA                                                                           |
| Supercontig_1.95_MV<br>LG_06020_8sp   | -376,33541 | -376,33514 | 0,00054 | 0,00027 | NS | 0 |  |  |  | 60S ribosomal protein<br>L32                            | PF01655.11 | Ribosomal_L32e(Ribosomal<br>protein L32)                                     |
| Supercontig_1.27_MV<br>LG_03078_10sp  | -750,12977 | -750,12977 | 0       | 0       | NS | 0 |  |  |  | hypothetical protein                                    | PF00132.17 | Hexapep(Bacterial transferase<br>hexapeptide (three repeats))                |
| Supercontig_1.20_MV<br>LG_02585_6sp   | -1076,6292 | -1076,6292 | 0       | 0       | NS | 0 |  |  |  | ribonucleoside-<br>diphosphate reductase<br>small chain | PF00268.14 | Ribonuc_red_sm(Ribonucleotide<br>reductase, small chain)                     |
| Supercontig_1.18_MV<br>LG_02412_8sp   | -832,53565 | -832,53558 | 0,00014 | 0,00316 | NS | 0 |  |  |  | hypothetical protein                                    | PF00153.20 | Mito_carr(Mitochondrial carrier<br>protein)                                  |
| Supercontig_1.62_MV<br>LG_05022_7sp   | -475,69607 | -475,69607 | 0       | 0,00316 | NS | 0 |  |  |  | hypothetical protein                                    | PF00378.13 | ECH(Enoyl-CoA<br>hydratase/isomerase family)                                 |
| Supercontig_1.83_MV<br>LG_05750_10sp  | -327,5835  | -327,58344 | 0,00012 | 0,00316 | NS | 0 |  |  |  | hypothetical protein                                    | PF00787.17 | PX(PX domain)                                                                |
| Supercontig_1.31_MV<br>LG_03358_8sp   | -1041,0757 | -1041,0757 | 0       | 0       | NS | 0 |  |  |  | phosphoenolpyruvate<br>carboxykinase [ATP]              | PF01293.13 | PEPCK_ATP(Phosphoenolpyruv<br>ate carboxykinase)                             |
| Supercontig_1.18_MV<br>LG_02409_10sp  | -427,64162 | -427,64145 | 0,00034 | 0,00017 | NS | 0 |  |  |  | hypothetical protein                                    | PF03159.11 | XRN_N(XRN 5'-3' exonuclease<br>N-terminus)                                   |
| Supercontig_1.63_MV<br>LG_05053_7sp   | -372,80821 | -372,80821 | 0       | 0       | NS | 0 |  |  |  | hypothetical protein                                    | PF00173.21 | Cyt-b5(Cytochrome b5-like<br>Heme/Steroid binding domain)                    |
| Supercontig_1.6_MVL<br>G_01118_7sp    | -671,92831 | -670,92939 | 1,99784 | 0,63172 | NS | 0 |  |  |  | hypothetical protein                                    | PF00226.24 | DnaJ(DnaJ domain)                                                            |
| Supercontig_1.4_MVL<br>G_00845_9sp    | -553,05232 | -552,6035  | 0,89764 | 0,36162 | NS | 0 |  |  |  | hypothetical protein                                    | NA         | NA                                                                           |
| Supercontig_1.26_MV<br>LG_03012_8sp   | -1088,3395 | -1087,5115 | 1,65594 | 0,56306 | NS | 0 |  |  |  | hypothetical protein                                    | PF08542.4  | Rep_fac_C(Replication factor C)                                              |
| Supercontig_1.18_MV<br>LG_02397_11sp  | -431,68071 | -431,63893 | 0,08356 | 0,04092 | NS | 0 |  |  |  | hypothetical protein                                    | NA         | NA                                                                           |
| Supercontig_1.2_MVL<br>G_00464_9sp    | -1049,9842 | -1049,9842 | 0       | 0       | NS | 0 |  |  |  | hypothetical protein                                    | PF04130.6  | Spc97_Spc98(Spc97 / Spc98<br>family)                                         |
| Supercontig_1.36_MV<br>LG_03680_8sp   | -1596,3148 | -1595,3665 | 1,89652 | 0,61259 | NS | 0 |  |  |  | hypothetical protein                                    | NA         | NA                                                                           |
| Supercontig_1.60_MV<br>LG_04947_9sp   | -684,48268 | -684,39508 | 0,1752  | 0,08387 | NS | 0 |  |  |  | hypothetical protein                                    | PF07973.7  | tRNA_SAD(Threonyl and Alanyl<br>tRNA synthetase second<br>additional domain) |
| Supercontig_1.58_MV<br>LG_04840_10sp  | -411,70735 | -411,62365 | 0,1674  | 0,08029 | NS | 0 |  |  |  | hypothetical protein                                    | PF01189.10 | Nol1_Nop2_Fmu(NOL1/NOP2/s<br>un family)                                      |
| Supercontig_1.132_MV<br>LG_06605_8sp  | -330,14788 | -330,14788 | 0       | 0       | NS | 0 |  |  |  | H/ACA<br>ribonucleoprotein<br>complex subunit 3         | PF04135.5  | Nop10p(Nucleolar RNA-binding<br>protein, Nop10p family)                      |
| Supercontig_1.101_MV<br>LG_06164_8sp  | -847,78115 | -847,78115 | 0       | 0       | NS | 0 |  |  |  | hypothetical protein                                    | PF08286.4  | Spc24(Spc24 subunit of Ndc80)                                                |
| Supercontig_1.92_MV<br>LG_05959_9sp   | -263,18397 | -263,18388 | 0,00018 | 0,00316 | NS | 0 |  |  |  | hypothetical protein                                    | PF00501.21 | AMP-binding(AMP-binding<br>enzyme)                                           |
| Supercontig_1.156_MV<br>LG_06833_10sp | -683,95667 | -683,95641 | 0,00052 | 0,00026 | NS | 0 |  |  |  | hypothetical protein                                    | PF03188.9  | Cytochrom_B561(Eukaryotic<br>cytochrome b561)                                |





|                                       |            |            |         |         |    |   |  |  |  |  |                                    |            |                                                                  |
|---------------------------------------|------------|------------|---------|---------|----|---|--|--|--|--|------------------------------------|------------|------------------------------------------------------------------|
| Supercontig_1.49_MV<br>LG_04429_12sp  | -814,21118 | -814,21118 | 0       | 0       | NS | 0 |  |  |  |  | hypothetical protein               | PF00018.21 | SH3_1(SH3 domain)                                                |
| Supercontig_1.30_MV<br>LG_03265_8sp   | -539,99966 | -540,27479 | 0       | 0       | NS | 0 |  |  |  |  | hypothetical protein               | PF00107.19 | ADH_zinc_N(Zinc-binding dehydrogenase)                           |
| Supercontig_1.121_MV<br>LG_06441_12sp | -608,17062 | -607,66841 | 1,00442 | 0,39481 | NS | 0 |  |  |  |  | hypothetical protein               | NA         | NA                                                               |
| Supercontig_1.49_MV<br>LG_04424_10sp  | -669,69738 | -669,69722 | 0,00032 | 0,00016 | NS | 0 |  |  |  |  | phosphatidylinositol 3-kinase tor2 | PF02260.13 | FATC(FATC domain)                                                |
| Supercontig_1.27_MV<br>LG_03083_9sp   | -623,61929 | -622,37694 | 2,4847  | 0,7113  | NS | 0 |  |  |  |  | hypothetical protein               | NA         | NA                                                               |
| Supercontig_1.123_MV<br>LG_06475_10sp | -891,16525 | -890,99561 | 0,33928 | 0,15603 | NS | 0 |  |  |  |  | hypothetical protein               | PF00135.21 | COesterase(Carboxylesterase)                                     |
| Supercontig_1.5_MVL<br>G_00930_8sp    | -1156,3829 | -1155,287  | 2,19172 | 0,66575 | NS | 0 |  |  |  |  | hypothetical protein               | PF00172.11 | Zn_clus(Fungal Zn(2)-Cys(6) binuclear cluster domain)            |
| Supercontig_1.3_MVL<br>G_00634_8sp    | -259,83882 | -259,83871 | 0,00022 | 0,00011 | NS | 0 |  |  |  |  | proteasome subunit beta type-2     | PF00227.19 | Proteasome(Proteasome subunit)                                   |
| Supercontig_1.46_MV<br>LG_04274_7sp   | -532,63517 | -529,41337 | 6,4436  | 0,96012 | ** | 0 |  |  |  |  | hypothetical protein               | NA         | NA                                                               |
| Supercontig_1.101_MV<br>LG_06154_9sp  | -567,6321  | -567,5788  | 0,1066  | 0,0519  | NS | 0 |  |  |  |  | hypothetical protein               | PF03452.7  | Anp1(Anp1)                                                       |
| Supercontig_1.35_MV<br>LG_03604_10sp  | -642,29438 | -642,29436 | 0,00316 | 0,00316 | NS | 0 |  |  |  |  | hypothetical protein               | PF07919.5  | DUF1683(Protein of unknown function (DUF1683))                   |
| Supercontig_1.55_MV<br>LG_04738_8sp   | -566,26743 | -565,33013 | 1,8746  | 0,60832 | NS | 0 |  |  |  |  | hypothetical protein               | NA         | NA                                                               |
| Supercontig_1.10_MV<br>LG_01595_12sp  | -1121,9965 | -1121,9965 | 0       | 0       | NS | 0 |  |  |  |  | hypothetical protein               | TIGR00596  | TIGR00596(rad1: DNA repair protein (rad1))                       |
| Supercontig_1.86_MV<br>LG_05818_6sp   | -1057,1314 | -1057,1313 | 0,00024 | 0,00012 | NS | 0 |  |  |  |  | hypothetical protein               | PF00023.23 | Ank(Ankyrin repeat)                                              |
| Supercontig_1.20_MV<br>LG_02543_7sp   | -326,9407  | -326,94056 | 0,00028 | 0,00014 | NS | 0 |  |  |  |  | hypothetical protein               | PF08477.6  | Miro(Miro-like protein)                                          |
| Supercontig_1.172_MV<br>LG_06947_8sp  | -477,4978  | -477,4978  | 0       | 0       | NS | 0 |  |  |  |  | hypothetical protein               | PF06807.7  | Clp1(Pre-mRNA cleavage complex II protein Clp1)                  |
| Supercontig_1.190_MV<br>LG_07041_7sp  | -660,82909 | -658,44237 | 4,77344 | 0,90807 | *  | 0 |  |  |  |  | hypothetical protein               | NA         | NA                                                               |
| Supercontig_1.11_MV<br>LG_01794_7sp   | -858,3078  | -856,393   | 3,8296  | 0,85263 | NS | 0 |  |  |  |  | hypothetical protein               | TIGR00329  | TIGR00329(gcp_kae1: metallohydrolase, glycoprotease/Kae1 family) |
| Supercontig_1.15_MV<br>LG_02066_10sp  | -300,93782 | -300,93773 | 0,00018 | 0,00316 | NS | 0 |  |  |  |  | hypothetical protein               | PF00153.20 | Mito_carr(Mitochondrial carrier protein)                         |
| Supercontig_1.47_MV<br>LG_04332_12sp  | -1608,9945 | -1608,9945 | 0       | 0       | NS | 0 |  |  |  |  | hypothetical protein               | NA         | NA                                                               |
| Supercontig_1.7_MVL<br>G_01347_7sp    | -552,93644 | -552,88081 | 0,11126 | 0,05411 | NS | 0 |  |  |  |  | hypothetical protein               | PF08059.6  | SEP(SEP domain)                                                  |
| Supercontig_1.74_MV<br>LG_05446_11sp  | -420,93562 | -420,93556 | 0,00012 | 0,00316 | NS | 0 |  |  |  |  | hypothetical protein               | PF01207.10 | Dus(Dihydrouridine synthase (Dus))                               |
| Supercontig_1.87_MV<br>LG_05860_8sp   | -561,30288 | -561,30259 | 0,00058 | 0,00029 | NS | 0 |  |  |  |  | hypothetical protein               | PF08649.3  | DASH_Dad1(DASH complex subunit Dad1)                             |
| Supercontig_1.127_MV<br>LG_06532_6sp  | -766,23808 | -765,74287 | 0,99042 | 0,39056 | NS | 0 |  |  |  |  | hypothetical protein               | NA         | NA                                                               |
| Supercontig_1.10_MV<br>LG_01671_9sp   | -721,90455 | -721,90455 | 0       | 0       | NS | 0 |  |  |  |  | hypothetical protein               | PF01833.17 | TIG(IPT/TIG domain)                                              |

|                                      |            |            |         |         |    |   |   |   |   |   |                                   |            |                                                                          |
|--------------------------------------|------------|------------|---------|---------|----|---|---|---|---|---|-----------------------------------|------------|--------------------------------------------------------------------------|
| Supercontig_1.88_MV<br>LG_05880_10sp | -1283,3342 | -1282,4563 | 1,75572 | 0,58433 | NS | 0 | □ | □ | □ | □ | hypothetical protein              | NA         | NA                                                                       |
| Supercontig_1.21_MV<br>LG_02681_8sp  | -497,11272 | -493,24667 | 7,7321  | 0,97906 | ** | 0 | □ | □ | □ | □ | hypothetical protein              | PF01095.12 | Pectinesterase(Pectinesterase)                                           |
| Supercontig_1.15_MV<br>LG_02091_9sp  | -555,04203 | -554,62333 | 0,8374  | 0,3421  | NS | 0 | □ | □ | □ | □ | hypothetical protein              | PF00107.19 | ADH_zinc_N(Zinc-binding dehydrogenase)                                   |
| Supercontig_1.116_MV<br>LG_06384_9sp | -481,84237 | -480,20162 | 3,2815  | 0,80617 | NS | 0 | □ | □ | □ | □ | hypothetical protein              | PF00069.18 | Pkinase(Protein kinase domain)                                           |
| Supercontig_1.4_MVL<br>G_00788_6sp   | -753,95319 | -753,77586 | 0,35466 | 0,1625  | NS | 0 | □ | □ | □ | □ | hypothetical protein              | PF00400.25 | WD40(WD domain, G-beta repeat)                                           |
| Supercontig_1.1_MVL<br>G_00123_10sp  | -1260,2926 | -1259,9013 | 0,78254 | 0,3238  | NS | 0 | □ | □ | □ | □ | hypothetical protein              | PF00097.18 | zf-C3HC4(Zinc finger, C3HC4 type (RING finger))                          |
| Supercontig_1.1_MVL<br>G_00093_6sp   | -625,74143 | -624,06112 | 3,36062 | 0,81368 | NS | 0 | □ | □ | □ | □ | hypothetical protein              | PF00300.15 | PGAM(Phosphoglycerate mutase family)                                     |
| Supercontig_1.156_MV<br>LG_06831_9sp | -492,10054 | -489,68161 | 4,83786 | 0,91098 | *  | 0 | □ | □ | □ | □ | hypothetical protein              | PF00551.12 | Formyl_trans_N(Formyl transferase)                                       |
| Supercontig_1.3_MVL<br>G_00585_10sp  | -415,54384 | -415,5394  | 0,00888 | 0,00443 | NS | 0 | □ | □ | □ | □ | hypothetical protein              | PF02115.10 | Rho_GDI(RHO protein GDP dissociation inhibitor)                          |
| Supercontig_1.69_MV<br>LG_05307_7sp  | -733,18543 | -733,13777 | 0,09532 | 0,04654 | NS | 0 | □ | □ | □ | □ | hypothetical protein              | NA         | NA                                                                       |
| Supercontig_1.52_MV<br>LG_04549_9sp  | -993,84567 | -993,8456  | 0,00014 | 0,00316 | NS | 0 | □ | □ | □ | □ | hypothetical protein              | PF00782.13 | DSPc(Dual specificity phosphatase, catalytic domain)                     |
| Supercontig_1.88_MV<br>LG_05891_9sp  | -829,32631 | -829,32631 | 0       | 0       | NS | 0 | □ | □ | □ | □ | hypothetical protein              | PF04054.8  | Not1(CCR4-Not complex component, Not1)                                   |
| Supercontig_1.30_MV<br>LG_03271_6sp  | -392,96339 | -392,96312 | 0,00054 | 0,00027 | NS | 0 | □ | □ | □ | □ | ubiquitin-conjugating enzyme spm2 | PF00179.19 | UQ_con(Ubiquitin-conjugating enzyme)                                     |
| Supercontig_1.77_MV<br>LG_05556_11sp | -372,29919 | -372,299   | 0,00038 | 0,00019 | NS | 0 | □ | □ | □ | □ | hypothetical protein              | PF08142.5  | AARP2CN(AARP2CN (NUC121) domain)                                         |
| Supercontig_1.5_MVL<br>G_01014_8sp   | -348,05994 | -348,05992 | 0,00316 | 0,00316 | NS | 0 | □ | □ | □ | □ | hypothetical protein              | PF03987.8  | Autophagy_act_C(Autophagocytosis associated protein, active-site domain) |
| Supercontig_1.27_MV<br>LG_03101_8sp  | -922,07212 | -922,07212 | 0       | 0       | NS | 0 | □ | □ | □ | □ | hypothetical protein              | PF10602.2  | RPN7(26S proteasome subunit RPN7)                                        |
| Supercontig_1.17_MV<br>LG_02259_11sp | -355,50011 | -355,49991 | 0,0004  | 0,0002  | NS | 0 | □ | □ | □ | □ | hypothetical protein              | PF08022.5  | FAD_binding_8(FAD-binding domain)                                        |
| Supercontig_1.20_MV<br>LG_02597_8sp  | -658,43137 | -658,24138 | 0,37998 | 0,17303 | NS | 0 | □ | □ | □ | □ | hypothetical protein              | PF07859.6  | Abhydrolase_3(alpha/beta hydrolase fold)                                 |
| Supercontig_1.44_MV<br>LG_04152_6sp  | -461,1626  | -459,89327 | 2,53866 | 0,71898 | NS | 0 | □ | □ | □ | □ | hypothetical protein              | NA         | NA                                                                       |
| Supercontig_1.25_MV<br>LG_02941_8sp  | -535,92276 | -535,46325 | 0,91902 | 0,36841 | NS | 0 | □ | □ | □ | □ | CAMK/CAMK1 protein kinase         | PF07714.10 | Pkinase_Tyr(Protein tyrosine kinase)                                     |
| Supercontig_1.10_MV<br>LG_01614_9sp  | -1668,8816 | -1667,9585 | 1,84622 | 0,60272 | NS | 0 | □ | □ | □ | □ | hypothetical protein              | PF07738.6  | Sad1_UNC(Sad1 / UNC-like C-terminal)                                     |
| Supercontig_1.33_MV<br>LG_03467_9sp  | -465,51346 | -465,51346 | 0       | 0       | NS | 0 | □ | □ | □ | □ | hypothetical protein              | PF00023.23 | Ank(Ankyrin repeat)                                                      |
| Supercontig_1.22_MV<br>LG_02746_8sp  | -764,16508 | -763,46164 | 1,40688 | 0,50512 | NS | 0 | □ | □ | □ | □ | hypothetical protein              | PF08445.3  | FR47(FR47-like protein)                                                  |
| Supercontig_1.30_MV<br>LG_03322_9sp  | -750,41725 | -750,41725 | 0       | 0       | NS | 0 | □ | □ | □ | □ | hypothetical protein              | NA         | NA                                                                       |

|                                       |            |            |         |         |    |   |   |   |   |   |                                     |            |                                                                           |
|---------------------------------------|------------|------------|---------|---------|----|---|---|---|---|---|-------------------------------------|------------|---------------------------------------------------------------------------|
| Supercontig_1.181_MV<br>LG_07006_10sp | -520,04742 | -520,04722 | 0,0004  | 0,0002  | NS | 0 | 0 | 0 | 0 | 0 | hypothetical protein                | TIGR00879  | TIGR00879(SP: MFS transporter, sugar porter (SP) family)                  |
| Supercontig_1.9_MVL<br>G_01478_8sp    | -478,91668 | -478,91665 | 0,00316 | 0,00316 | NS | 0 | 0 | 0 | 0 | 0 | hypothetical protein                | NA         | NA                                                                        |
| Supercontig_1.6_MVL<br>G_01095_6sp    | -551,97988 | -551,97988 | 0       | 0       | NS | 0 | 0 | 0 | 0 | 0 | hypothetical protein                | NA         | NA                                                                        |
| Supercontig_1.1_MVL<br>G_00151_10sp   | -560,4104  | -560,27522 | 0,27036 | 0,12644 | NS | 0 | 0 | 0 | 0 | 0 | hypothetical protein                | PF00481.14 | PP2C(Protein phosphatase 2C)                                              |
| Supercontig_1.92_MV<br>LG_05948_11sp  | -380,01881 | -379,51572 | 1,00618 | 0,39534 | NS | 0 | 0 | 0 | 0 | 0 | hypothetical protein                | NA         | NA                                                                        |
| Supercontig_1.21_MV<br>LG_02668_8sp   | -581,41891 | -580,32483 | 2,18816 | 0,66515 | NS | 0 | 0 | 0 | 0 | 0 | hypothetical protein                | PF04139.6  | Rad9(Rad9)                                                                |
| Supercontig_1.110_MV<br>LG_06291_8sp  | -708,14793 | -707,85776 | 0,58034 | 0,25186 | NS | 0 | 0 | 0 | 0 | 0 | hypothetical protein                | PF00106.18 | adh_short(short chain dehydrogenase)                                      |
| Supercontig_1.12_MV<br>LG_01869_10sp  | -544,97824 | -544,97819 | 0,00316 | 0,00316 | NS | 0 | 0 | 0 | 0 | 0 | hypothetical protein                | PF10297.2  | Hap4_Hap_bind(Minimal binding domain of Hap4 for binding to Hap2/3/5)     |
| Supercontig_1.29_MV<br>LG_03250_10sp  | -958,16695 | -958,16695 | 0       | 0       | NS | 0 | 0 | 0 | 0 | 0 | hypothetical protein                | PF10392.2  | COG5(Golgi transport complex subunit 5)                                   |
| Supercontig_1.60_MV<br>LG_04921_9sp   | -718,53563 | -718,53563 | 0       | 0       | NS | 0 | 0 | 0 | 0 | 0 | elongation factor EF-1 beta subunit | PF10587.2  | EF-1_beta_acid(Eukaryotic elongation factor 1 beta central acidic region) |
| Supercontig_1.15_MV<br>LG_02113_7sp   | -566,3497  | -566,3497  | 0       | 0       | NS | 0 | 0 | 0 | 0 | 0 | hypothetical protein                | PF07859.6  | Abhydrolase_3(alpha/beta hydrolase fold)                                  |
| Supercontig_1.16_MV<br>LG_02185_12sp  | -519,9894  | -519,92752 | 0,12376 | 0,06    | NS | 0 | 0 | 0 | 0 | 0 | hypothetical protein                | PF00010.19 | HLH(Helix-loop-helix DNA-binding domain)                                  |
| Supercontig_1.12_MV<br>LG_01818_9sp   | -331,65092 | -331,65089 | 0,00316 | 0,00316 | NS | 0 | 0 | 0 | 0 | 0 | hypothetical protein                | PF07940.6  | Hepar_II_III(Heparinase II/III-like protein)                              |
| Supercontig_1.44_MV<br>LG_04172_7sp   | -1082,2956 | -1082,2956 | 0       | 0       | NS | 0 | 0 | 0 | 0 | 0 | hypothetical protein                | PF00566.11 | TBC(TBC domain)                                                           |
| Supercontig_1.28_MV<br>LG_03143_7sp   | -671,78324 | -671,78324 | 0       | 0       | NS | 0 | 0 | 0 | 0 | 0 | GDP-L-fucose synthase               | PF01370.14 | Epimerase(NAD dependent epimerase/dehydratase family)                     |
| Supercontig_1.113_MV<br>LG_06349_9sp  | -539,22863 | -538,9753  | 0,50666 | 0,22379 | NS | 0 | 0 | 0 | 0 | 0 | hypothetical protein                | PF00296.13 | Bac_luciferase(Luciferase-like monooxygenase)                             |
| Supercontig_1.20_MV<br>LG_02570_9sp   | -1012,0852 | -1012,0852 | 0       | 0       | NS | 0 | 0 | 0 | 0 | 0 | hypothetical protein                | NA         | NA                                                                        |
| Supercontig_1.38_MV<br>LG_03763_11sp  | -544,39349 | -544,39349 | 0       | 0       | NS | 0 | 0 | 0 | 0 | 0 | hypothetical protein                | PF03162.6  | Y_phosphatase2(Tyrosine phosphatase family)                               |
| Supercontig_1.9_MVL<br>G_01483_6sp    | -684,35439 | -684,35408 | 0,00062 | 0,00031 | NS | 0 | 0 | 0 | 0 | 0 | ribosomal protein L4                | PF01248.19 | Ribosoma_L7Ae(Ribosomal protein L7Ae/L30e/S12e/Gadd45 family)             |
| Supercontig_1.101_MV<br>LG_06157_12sp | -386,30582 | -386,30567 | 0,0003  | 0,00015 | NS | 0 | 0 | 0 | 0 | 0 | hypothetical protein                | TIGR00797  | TIGR00797(matE: MATE efflux family protein)                               |
| Supercontig_1.33_MV<br>LG_03500_10sp  | -612,55522 | -612,55522 | 0       | 0       | NS | 0 | 0 | 0 | 0 | 0 | hypothetical protein                | NA         | NA                                                                        |
| Supercontig_1.48_MV<br>LG_04371_12sp  | -368,50296 | -368,50273 | 0,00046 | 0,00023 | NS | 0 | 0 | 0 | 0 | 0 | hypothetical protein                | PF01494.12 | FAD_binding_3(FAD binding domain)                                         |
| Supercontig_1.45_MV<br>LG_04213_8sp   | -2189,2423 | -2186,8238 | 4,83698 | 0,91094 | *  | 0 | 0 | 0 | 0 | 0 | hypothetical protein                | PF02181.16 | FH2(Formin Homology 2 Domain)                                             |



|                                      |            |            |         |         |    |   |   |   |   |                                              |            |                                                                   |
|--------------------------------------|------------|------------|---------|---------|----|---|---|---|---|----------------------------------------------|------------|-------------------------------------------------------------------|
| Supercontig_1.5_MVL<br>G_00898_6sp   | -613,25921 | -612,93883 | 0,64076 | 0,27413 | NS | 0 | 0 | 0 | 0 | hypothetical protein                         | PF05032.5  | Spo12(Spo12 family)                                               |
| Supercontig_1.4_MVL<br>G_00712_6sp   | -573,35805 | -573,02477 | 0,66656 | 0,28343 | NS | 0 | 0 | 0 | 0 | hypothetical protein                         | PF00106.18 | adh_short(short chain dehydrogenase)                              |
| Supercontig_1.4_MVL<br>G_00772_7sp   | -814,98324 | -814,98304 | 0,0004  | 0,0002  | NS | 0 | 0 | 0 | 0 | hypothetical protein                         | PF01926.16 | MMR_HSR1(GTPase of unknown function)                              |
| Supercontig_1.166_MV<br>LG_06915_9sp | -823,70101 | -823,52765 | 0,34672 | 0,15917 | NS | 0 | 0 | 0 | 0 | hypothetical protein                         | PF04696.6  | Pinin_SDK_memA(pinin/SDK/me mA/ protein conserved region)         |
| Supercontig_1.1_MVL<br>G_00053_7sp   | -1031,2794 | -1031,2794 | 0,00316 | 0,00316 | NS | 0 | 0 | 0 | 0 | hypothetical protein                         | NA         | NA                                                                |
| Supercontig_1.33_MV<br>LG_03461_11sp | -336,45751 | -336,45739 | 0,00024 | 0,00012 | NS | 0 | 0 | 0 | 0 | arginine biosynthesis ArgJ                   | PF01960.11 | ArgJ(ArgJ family)                                                 |
| Supercontig_1.25_MV<br>LG_02979_7sp  | -313,84659 | -313,84659 | 0       | 0       | NS | 0 | 0 | 0 | 0 | hypothetical protein                         | PF03081.8  | Exo70(Exo70 exocyst complex subunit)                              |
| Supercontig_1.2_MVL<br>G_00327_10sp  | -581,67368 | -581,67352 | 0,00032 | 0,00016 | NS | 0 | 0 | 0 | 0 | hypothetical protein                         | PF04003.5  | Utp12(Dip2/Utp12 Family)                                          |
| Supercontig_1.47_MV<br>LG_04309_8sp  | -577,30314 | -577,30314 | 0       | 0       | NS | 0 | 0 | 0 | 0 | hypothetical protein                         | PF03824.9  | NicO(High-affinity nickel-transport protein)                      |
| Supercontig_1.6_MVL<br>G_01193_7sp   | -485,00167 | -485,00167 | 0       | 0       | NS | 0 | 0 | 0 | 0 | hypothetical protein                         | NA         | NA                                                                |
| Supercontig_1.28_MV<br>LG_03134_10sp | -746,31511 | -746,31484 | 0,00054 | 0,00027 | NS | 0 | 0 | 0 | 0 | hypothetical protein                         | PF00400.25 | WD40(WD domain, G-beta repeat)                                    |
| Supercontig_1.86_MV<br>LG_05822_10sp | -1135,1032 | -1135,1032 | 0       | 0       | NS | 0 | 0 | 0 | 0 | hypothetical protein                         | NA         | NA                                                                |
| Supercontig_1.33_MV<br>LG_03497_11sp | -889,73764 | -889,71767 | 0,03994 | 0,01977 | NS | 0 | 0 | 0 | 0 | hypothetical protein                         | PF08576.3  | DUF1764(Eukaryotic protein of unknown function (DUF1764))         |
| Supercontig_1.1_MVL<br>G_00059_6sp   | -297,10881 | -297,10879 | 0,00316 | 0,00316 | NS | 0 | 0 | 0 | 0 | ubiquitin-like protein 5                     | PF00240.16 | ubiquitin(Ubiquitin family)                                       |
| Supercontig_1.3_MVL<br>G_00508_10sp  | -769,41986 | -769,41986 | 0,00316 | 0,00316 | NS | 0 | 0 | 0 | 0 | ribosomal RNA methyltransferase 1            | TIGR00438  | TIGR00438(rrmJ: 23S rRNA (uridine(2552)-2'-O-)-methyltransferase) |
| Supercontig_1.32_MV<br>LG_03413_9sp  | -562,3008  | -562,29923 | 0,00316 | 0,00316 | NS | 0 | 0 | 0 | 0 | proteasome subunit alpha type-7 like-protein | PF00227.19 | Proteasome(Proteasome subunit)                                    |
| Supercontig_1.80_MV<br>LG_05635_10sp | -796,70404 | -796,70399 | 0,00316 | 0,00316 | NS | 0 | 0 | 0 | 0 | hypothetical protein                         | PF08524.4  | rRNA_processing(rRNA processing)                                  |
| Supercontig_1.61_MV<br>LG_04987_8sp  | -456,07188 | -456,07181 | 0,00316 | 0,00316 | NS | 0 | 0 | 0 | 0 | hypothetical protein                         | NA         | NA                                                                |
| Supercontig_1.12_MV<br>LG_01796_6sp  | -822,1748  | -822,1747  | 0,00316 | 0,00316 | NS | 0 | 0 | 0 | 0 | DNA-directed RNA polymerase II subunit RPB2  | PF04565.9  | RNA_pol_Rpb2_3(RNA polymerase Rpb2, domain 3)                     |
| Supercontig_1.2_MVL<br>G_00417_10sp  | -690,74204 | -690,74204 | 0       | 0       | NS | 0 | 0 | 0 | 0 | hypothetical protein                         | NA         | NA                                                                |
| Supercontig_1.48_MV<br>LG_04355_9sp  | -563,34656 | -563,34627 | 0,00058 | 0,00029 | NS | 0 | 0 | 0 | 0 | hypothetical protein                         | PF03836.8  | RasGAP_C(RasGAP C-terminus)                                       |
| Supercontig_1.64_MV<br>LG_05099_10sp | -653,14603 | -652,41366 | 1,46474 | 0,51923 | NS | 0 | 0 | 0 | 0 | hypothetical protein                         | NA         | NA                                                                |
| Supercontig_1.23_MV<br>LG_02772_12sp | -898,45348 | -898,45348 | 0       | 0       | NS | 0 | 0 | 0 | 0 | hypothetical protein                         | NA         | NA                                                                |

|                                       |            |            |         |         |    |   |   |   |   |   |   |   |   |   |                      |            |                                                                        |
|---------------------------------------|------------|------------|---------|---------|----|---|---|---|---|---|---|---|---|---|----------------------|------------|------------------------------------------------------------------------|
| Supercontig_1.66_MV<br>LG_05197_10sp  | -840,51937 | -840,51937 | 0       | 0       | NS | 0 | 0 | 0 | 0 | 0 | 0 | 0 | 0 | 0 | hypothetical protein | PF00250.11 | Fork_head(Fork head domain)                                            |
| Supercontig_1.19_MV<br>LG_02501_9sp   | -455,29387 | -455,29387 | 0       | 0       | NS | 0 | 0 | 0 | 0 | 0 | 0 | 0 | 0 | 0 | hypothetical protein | PF08022.5  | FAD_binding_8(FAD-binding domain)                                      |
| Supercontig_1.60_MV<br>LG_04937_9sp   | -508,38507 | -508,37413 | 0,02188 | 0,01088 | NS | 0 | 0 | 0 | 0 | 0 | 0 | 0 | 0 | 0 | threonine synthase   | PF00291.18 | PALP(Pyridoxal-phosphate dependent enzyme)                             |
| Supercontig_1.36_MV<br>LG_03644_10sp  | -511,64473 | -511,64473 | 0       | 0       | NS | 0 | 0 | 0 | 0 | 0 | 0 | 0 | 0 | 0 | hypothetical protein | PF08318.5  | COG4(COG4 transport protein)                                           |
| Supercontig_1.243_MV<br>LG_07207_6sp  | -465,5659  | -465,56589 | 0,00316 | 0,00316 | NS | 0 | 0 | 0 | 0 | 0 | 0 | 0 | 0 | 0 | hypothetical protein | NA         | NA                                                                     |
| Supercontig_1.5_MVL<br>G_00990_9sp    | -740,58835 | -740,58835 | 0       | 0       | NS | 0 | 0 | 0 | 0 | 0 | 0 | 0 | 0 | 0 | hypothetical protein | PF01556.11 | DnaJ_C(DnaJ C terminal region)                                         |
| Supercontig_1.25_MV<br>LG_02912_10sp  | -395,40656 | -395,40647 | 0,00018 | 0,00316 | NS | 0 | 0 | 0 | 0 | 0 | 0 | 0 | 0 | 0 | hypothetical protein | NA         | NA                                                                     |
| Supercontig_1.1_MVL<br>G_00260_6sp    | -374,65249 | -373,21175 | 2,88148 | 0,76325 | NS | 0 | 0 | 0 | 0 | 0 | 0 | 0 | 0 | 0 | hypothetical protein | NA         | NA                                                                     |
| Supercontig_1.47_MV<br>LG_04331_7sp   | -757,5592  | -756,41762 | 2,28316 | 0,68069 | NS | 0 | 0 | 0 | 0 | 0 | 0 | 0 | 0 | 0 | hypothetical protein | PF03399.9  | SAC3_GANP(SAC3/GANP/Nin1/mts3/eIF-3 p25 family)                        |
| Supercontig_1.31_MV<br>LG_03347_11sp  | -678,52865 | -678,52865 | 0       | 0       | NS | 0 | 0 | 0 | 0 | 0 | 0 | 0 | 0 | 0 | hypothetical protein | NA         | NA                                                                     |
| Supercontig_1.59_MV<br>LG_04911_10sp  | -632,28634 | -632,28634 | 0       | 0       | NS | 0 | 0 | 0 | 0 | 0 | 0 | 0 | 0 | 0 | hypothetical protein | PF04145.8  | Ctr(Ctr copper transporter family)                                     |
| Supercontig_1.8_MVL<br>G_01450_11sp   | -610,58435 | -610,58415 | 0,0004  | 0,0002  | NS | 0 | 0 | 0 | 0 | 0 | 0 | 0 | 0 | 0 | hypothetical protein | NA         | NA                                                                     |
| Supercontig_1.17_MV<br>LG_02340_10sp  | -519,59591 | -519,59573 | 0,00036 | 0,00018 | NS | 0 | 0 | 0 | 0 | 0 | 0 | 0 | 0 | 0 | hypothetical protein | PF02815.12 | MIR(MIR domain)                                                        |
| Supercontig_1.12_MV<br>LG_01872_8sp   | -575,15834 | -575,15831 | 0,00316 | 0,00316 | NS | 0 | 0 | 0 | 0 | 0 | 0 | 0 | 0 | 0 | hypothetical protein | NA         | NA                                                                     |
| Supercontig_1.121_MV<br>LG_06443_8sp  | -531,16243 | -531,1624  | 0,00316 | 0,00316 | NS | 0 | 0 | 0 | 0 | 0 | 0 | 0 | 0 | 0 | hypothetical protein | PF00172.11 | Zn_clus(Fungal Zn(2)-Cys(6) binuclear cluster domain)                  |
| Supercontig_1.42_MV<br>LG_04046_10sp  | -529,75158 | -529,14067 | 1,22182 | 0,45714 | NS | 0 | 0 | 0 | 0 | 0 | 0 | 0 | 0 | 0 | hypothetical protein | PF02204.11 | VPS9(Vacuolar sorting protein 9 (VPS9) domain)                         |
| Supercontig_1.5_MVL<br>G_00878_11sp   | -601,53829 | -601,53829 | 0       | 0       | NS | 0 | 0 | 0 | 0 | 0 | 0 | 0 | 0 | 0 | hypothetical protein | PF08241.5  | Methyltransf_11(Methyltransferase domain)                              |
| Supercontig_1.18_MV<br>LG_02354_10sp  | -514,94312 | -514,94306 | 0,00012 | 0,00316 | NS | 0 | 0 | 0 | 0 | 0 | 0 | 0 | 0 | 0 | hypothetical protein | NA         | NA                                                                     |
| Supercontig_1.117_MV<br>LG_06386_12sp | -770,77579 | -770,77579 | 0       | 0       | NS | 0 | 0 | 0 | 0 | 0 | 0 | 0 | 0 | 0 | hypothetical protein | TIGR02041  | TIGR02041(Cyst: sulfite reductase (NADPH) hemoprotein, beta-component) |
| Supercontig_1.84_MV<br>LG_05765_7sp   | -505,56215 | -502,22402 | 6,67626 | 0,9645  | ** | 0 | 0 | 0 | 0 | 0 | 0 | 0 | 0 | 0 | hypothetical protein | NA         | NA                                                                     |
| Supercontig_1.2_MVL<br>G_00320_10sp   | -396,38664 | -396,38664 | 0       | 0       | NS | 0 | 0 | 0 | 0 | 0 | 0 | 0 | 0 | 0 | hypothetical protein | PF00733.14 | Asn_synthase(Asparagine synthase)                                      |
| Supercontig_1.44_MV<br>LG_04177_11sp  | -734,85841 | -734,85808 | 0,00066 | 0,00033 | NS | 0 | 0 | 0 | 0 | 0 | 0 | 0 | 0 | 0 | hypothetical protein | NA         | NA                                                                     |
| Supercontig_1.8_MVL<br>G_01400_7sp    | -452,20781 | -450,07971 | 4,2562  | 0,88094 | NS | 0 | 0 | 0 | 0 | 0 | 0 | 0 | 0 | 0 | hypothetical protein | NA         | NA                                                                     |
| Supercontig_1.7_MVL<br>G_01271_7sp    | -813,10129 | -811,67182 | 2,85894 | 0,76056 | NS | 0 | 0 | 0 | 0 | 0 | 0 | 0 | 0 | 0 | hypothetical protein | PF06441.5  | EHN(Epoxide hydrolase N terminus)                                      |
| Supercontig_1.30_MV<br>LG_03276_10sp  | -658,25602 | -658,25602 | 0       | 0       | NS | 0 | 0 | 0 | 0 | 0 | 0 | 0 | 0 | 0 | hypothetical protein | PF01713.14 | Smr(Smr domain)                                                        |

|                                      |            |            |         |         |    |   |  |  |  |  |                                       |            |                                                              |
|--------------------------------------|------------|------------|---------|---------|----|---|--|--|--|--|---------------------------------------|------------|--------------------------------------------------------------|
| Supercontig_1.54_MV<br>LG_04656_11sp | -558,3432  | -558,34238 | 0,00164 | 0,00082 | NS | 0 |  |  |  |  | hypothetical protein                  | NA         | NA                                                           |
| Supercontig_1.50_MV<br>LG_04494_6sp  | -378,60873 | -378,27436 | 0,66874 | 0,28421 | NS | 0 |  |  |  |  | hypothetical protein                  | NA         | NA                                                           |
| Supercontig_1.58_MV<br>LG_04855_8sp  | -1000,2795 | -1000,2795 | 0       | 0       | NS | 0 |  |  |  |  | hypothetical protein                  | NA         | NA                                                           |
| Supercontig_1.113_MV<br>LG_06345_9sp | -557,974   | -556,82993 | 2,28814 | 0,68148 | NS | 0 |  |  |  |  | hypothetical protein                  | PF00923.12 | Transaldolase(Transaldolase)                                 |
| Supercontig_1.48_MV<br>LG_04386_7sp  | -1184,3127 | -1184,3127 | 0       | 0       | NS | 0 |  |  |  |  | hypothetical protein                  | NA         | NA                                                           |
| Supercontig_1.40_MV<br>LG_03920_9sp  | -1422,4292 | -1422,4292 | 0       | 0       | NS | 0 |  |  |  |  | hypothetical protein                  | PF00168.23 | C2(C2 domain)                                                |
| Supercontig_1.76_MV<br>LG_05525_9sp  | -508,46859 | -508,28088 | 0,37542 | 0,17114 | NS | 0 |  |  |  |  | hypothetical protein                  | NA         | NA                                                           |
| Supercontig_1.97_MV<br>LG_06059_10sp | -792,40103 | -792,10363 | 0,5948  | 0,25725 | NS | 0 |  |  |  |  | hypothetical protein                  | NA         | NA                                                           |
| Supercontig_1.19_MV<br>LG_02492_6sp  | -1102,3186 | -1102,3186 | 0       | 0       | NS | 0 |  |  |  |  | hypothetical protein                  | PF00533.19 | BRCT(BRCA1 C Terminus<br>(BRCT) domain)                      |
| Supercontig_1.7_MVL<br>G_01313_10sp  | -518,10973 | -517,85226 | 0,51494 | 0,227   | NS | 0 |  |  |  |  | hypothetical protein                  | PF00620.20 | RhoGAP(RhoGAP domain)                                        |
| Supercontig_1.28_MV<br>LG_03178_8sp  | -1525,4424 | -1524,3873 | 2,1103  | 0,65186 | NS | 0 |  |  |  |  | hypothetical protein                  | PF00225.16 | Kinesin(Kinesin motor domain)                                |
| Supercontig_1.46_MV<br>LG_04293_8sp  | -506,59393 | -506,59393 | 0       | 0       | NS | 0 |  |  |  |  | phosphomannomutase                    | PF03332.6  | PMM(Eukaryotic<br>phosphomannomutase)                        |
| Supercontig_1.3_MVL<br>G_00580_9sp   | -564,29979 | -564,23237 | 0,13484 | 0,0652  | NS | 0 |  |  |  |  | hypothetical protein                  | NA         | NA                                                           |
| Supercontig_1.14_MV<br>LG_02048_11sp | -669,99683 | -668,60852 | 2,77662 | 0,7505  | NS | 0 |  |  |  |  | hypothetical protein                  | NA         | NA                                                           |
| Supercontig_1.38_MV<br>LG_03803_7sp  | -585,79853 | -585,58215 | 0,43276 | 0,19457 | NS | 0 |  |  |  |  | hypothetical protein                  | NA         | NA                                                           |
| Supercontig_1.38_MV<br>LG_03826_6sp  | -1647,1125 | -1646,7486 | 0,7279  | 0,30507 | NS | 0 |  |  |  |  | hypothetical protein                  | NA         | NA                                                           |
| Supercontig_1.1_MVL<br>G_00101_7sp   | -457,43724 | -457,28891 | 0,29666 | 0,13785 | NS | 0 |  |  |  |  | hypothetical protein                  | PF09830.2  | ATP_transf(ATP<br>adenylyltransferase)                       |
| Supercontig_1.10_MV<br>LG_01644_6sp  | -440,65259 | -440,65251 | 0,00016 | 0,00316 | NS | 0 |  |  |  |  | COP9 signalosome<br>complex subunit 5 | PF01398.14 | Mov34(Mov34/MPN/PAD-1<br>family)                             |
| Supercontig_1.48_MV<br>LG_04394_6sp  | -403,6294  | -402,16263 | 2,93354 | 0,76933 | NS | 0 |  |  |  |  | hypothetical protein                  | NA         | NA                                                           |
| Supercontig_1.55_MV<br>LG_04713_10sp | -699,63027 | -698,87794 | 1,50466 | 0,52873 | NS | 0 |  |  |  |  | hypothetical protein                  | PF01243.13 | Pyridox_oxidase(Pyridoxamine 5'<br>phosphate oxidase)        |
| Supercontig_1.55_MV<br>LG_04714_6sp  | -735,14675 | -732,33836 | 5,61678 | 0,9397  | *  | 0 |  |  |  |  | hypothetical protein                  | PF00875.11 | DNA_photolyase(DNA<br>photolyase)                            |
| Supercontig_1.1_MVL<br>G_00271_12sp  | -502,42672 | -502,42672 | 0       | 0       | NS | 0 |  |  |  |  | hypothetical protein                  | PF01602.13 | Adaptin_N(Adaptin N terminal<br>region)                      |
| Supercontig_1.24_MV<br>LG_02867_9sp  | -1068,3464 | -1068,3464 | 0       | 0       | NS | 0 |  |  |  |  | hypothetical protein                  | PF07842.5  | GCFC(GC-rich sequence DNA-<br>binding factor-like protein)   |
| Supercontig_1.53_MV<br>LG_04599_12sp | -391,11179 | -389,33031 | 3,56296 | 0,83161 | NS | 0 |  |  |  |  | ubiquitin-activating<br>enzyme E1 1   | PF10585.2  | UBA_e1_thiolCys(Ubiquitin-<br>activating enzyme active site) |
| Supercontig_1.2_MVL<br>G_00407_8sp   | -778,50268 | -778,50268 | 0       | 0       | NS | 0 |  |  |  |  | hypothetical protein                  | PF03099.12 | BPL_LpIA_LipB(Biotin/lipoate<br>A/B protein ligase family)   |
| Supercontig_1.75_MV<br>LG_05495_10sp | -831,02807 | -831,02011 | 0,01592 | 0,00793 | NS | 0 |  |  |  |  | hypothetical protein                  | NA         | NA                                                           |

|                                       |            |            |         |         |    |   |   |   |   |   |   |   |   |   |   |   |   |   |   |   |                                                                 |            |                                                                      |
|---------------------------------------|------------|------------|---------|---------|----|---|---|---|---|---|---|---|---|---|---|---|---|---|---|---|-----------------------------------------------------------------|------------|----------------------------------------------------------------------|
| Supercontig_1.28_MV<br>LG_03163_7sp   | -491,58267 | -491,58267 | 0       | 0       | NS | 0 | 0 | 0 | 0 | 0 | 0 | 0 | 0 | 0 | 0 | 0 | 0 | 0 | 0 | 0 | hypothetical protein                                            | PF06544.5  | DUF1115(Protein of unknown function (DUF1115))                       |
| Supercontig_1.10_MV<br>LG_01640_7sp   | -319,15923 | -319,15923 | 0       | 0       | NS | 0 | 0 | 0 | 0 | 0 | 0 | 0 | 0 | 0 | 0 | 0 | 0 | 0 | 0 | 0 | hypothetical protein                                            | NA         | NA                                                                   |
| Supercontig_1.7_MVL<br>G_01325_7sp    | -822,20143 | -822,20142 | 0,00316 | 0,00316 | NS | 0 | 0 | 0 | 0 | 0 | 0 | 0 | 0 | 0 | 0 | 0 | 0 | 0 | 0 | 0 | hypothetical protein                                            | PF03155.8  | Alg6_Alg8(ALG6, ALG8 glycosyltransferase family)                     |
| Supercontig_1.140_MV<br>LG_06682_6sp  | -413,40174 | -413,40174 | 0       | 0       | NS | 0 | 0 | 0 | 0 | 0 | 0 | 0 | 0 | 0 | 0 | 0 | 0 | 0 | 0 | 0 | U6 snRNA-associated Sm-like protein LSM6                        | PF01423.15 | LSM(LSM domain)                                                      |
| Supercontig_1.24_MV<br>LG_02886_8sp   | -535,43569 | -535,43558 | 0,00022 | 0,00011 | NS | 0 | 0 | 0 | 0 | 0 | 0 | 0 | 0 | 0 | 0 | 0 | 0 | 0 | 0 | 0 | ubiquitin-conjugating enzyme (huntingtin interacting protein 2) | PF00179.19 | UQ_con(Ubiquitin-conjugating enzyme)                                 |
| Supercontig_1.54_MV<br>LG_04675_8sp   | -1377,1973 | -1376,6862 | 1,0223  | 0,40019 | NS | 0 | 0 | 0 | 0 | 0 | 0 | 0 | 0 | 0 | 0 | 0 | 0 | 0 | 0 | 0 | hypothetical protein                                            | NA         | NA                                                                   |
| Supercontig_1.28_MV<br>LG_03139_7sp   | -670,66386 | -670,6633  | 0,00112 | 0,00056 | NS | 0 | 0 | 0 | 0 | 0 | 0 | 0 | 0 | 0 | 0 | 0 | 0 | 0 | 0 | 0 | septum-promoting GTP-binding protein 1                          | PF04670.5  | Gtr1_RagA(Gtr1/RagA G protein conserved region)                      |
| Supercontig_1.14_MV<br>LG_02016_9sp   | -415,72919 | -415,20869 | 1,041   | 0,40578 | NS | 0 | 0 | 0 | 0 | 0 | 0 | 0 | 0 | 0 | 0 | 0 | 0 | 0 | 0 | 0 | hypothetical protein                                            | PF06747.6  | CHCH(CHCH domain)                                                    |
| Supercontig_1.142_MV<br>LG_06708_7sp  | -901,09078 | -899,87661 | 2,42834 | 0,70304 | NS | 0 | 0 | 0 | 0 | 0 | 0 | 0 | 0 | 0 | 0 | 0 | 0 | 0 | 0 | 0 | hypothetical protein                                            | NA         | NA                                                                   |
| Supercontig_1.239_MV<br>LG_07201_9sp  | -793,91303 | -793,69285 | 0,44036 | 0,19763 | NS | 0 | 0 | 0 | 0 | 0 | 0 | 0 | 0 | 0 | 0 | 0 | 0 | 0 | 0 | 0 | hypothetical protein                                            | NA         | NA                                                                   |
| Supercontig_1.42_MV<br>LG_04090_7sp   | -809,13751 | -809,13751 | 0       | 0       | NS | 0 | 0 | 0 | 0 | 0 | 0 | 0 | 0 | 0 | 0 | 0 | 0 | 0 | 0 | 0 | hypothetical protein                                            | PF00704.21 | Glyco_hydro_18(Glycosyl hydrolases family 18)                        |
| Supercontig_1.14_MV<br>LG_01981_7sp   | -801,77095 | -801,65674 | 0,22842 | 0,10793 | NS | 0 | 0 | 0 | 0 | 0 | 0 | 0 | 0 | 0 | 0 | 0 | 0 | 0 | 0 | 0 | hypothetical protein                                            | NA         | NA                                                                   |
| Supercontig_1.2_MVL<br>G_00441_8sp    | -507,54964 | -507,54964 | 0       | 0       | NS | 0 | 0 | 0 | 0 | 0 | 0 | 0 | 0 | 0 | 0 | 0 | 0 | 0 | 0 | 0 | hypothetical protein                                            | NA         | NA                                                                   |
| Supercontig_1.48_MV<br>LG_04390_10sp  | -544,4261  | -544,41009 | 0,03202 | 0,01588 | NS | 0 | 0 | 0 | 0 | 0 | 0 | 0 | 0 | 0 | 0 | 0 | 0 | 0 | 0 | 0 | hypothetical protein                                            | NA         | NA                                                                   |
| Supercontig_1.2_MVL<br>G_00353_9sp    | -815,45589 | -813,89749 | 3,1168  | 0,78953 | NS | 0 | 0 | 0 | 0 | 0 | 0 | 0 | 0 | 0 | 0 | 0 | 0 | 0 | 0 | 0 | hypothetical protein                                            | PF08159.5  | NUC153(NUC153 domain)                                                |
| Supercontig_1.11_MV<br>LG_01782_9sp   | -1245,7878 | -1245,7878 | 0       | 0       | NS | 0 | 0 | 0 | 0 | 0 | 0 | 0 | 0 | 0 | 0 | 0 | 0 | 0 | 0 | 0 | heat shock protein HSS1                                         | TIGR02350  | TIGR02350(prok_dnaK: chaperone protein DnaK)                         |
| Supercontig_1.51_MV<br>LG_04537_10sp  | -415,86337 | -415,86337 | 0       | 0       | NS | 0 | 0 | 0 | 0 | 0 | 0 | 0 | 0 | 0 | 0 | 0 | 0 | 0 | 0 | 0 | hypothetical protein                                            | TIGR01509  | TIGR01509(HAD-SF-IA-v3: HAD hydrolase, family IA, variant 3)         |
| Supercontig_1.69_MV<br>LG_05306_9sp   | -854,60741 | -853,85001 | 1,5148  | 0,53112 | NS | 0 | 0 | 0 | 0 | 0 | 0 | 0 | 0 | 0 | 0 | 0 | 0 | 0 | 0 | 0 | hypothetical protein                                            | PF04931.6  | DNA_po_phi(DNA polymerase phi)                                       |
| Supercontig_1.21_MV<br>LG_02622_8sp   | -412,96588 | -412,96574 | 0,00028 | 0,00014 | NS | 0 | 0 | 0 | 0 | 0 | 0 | 0 | 0 | 0 | 0 | 0 | 0 | 0 | 0 | 0 | hypothetical protein                                            | PF00106.18 | adh_short(short chain dehydrogenase)                                 |
| Supercontig_1.25_MV<br>LG_02964_9sp   | -486,93194 | -486,93038 | 0,00312 | 0,00156 | NS | 0 | 0 | 0 | 0 | 0 | 0 | 0 | 0 | 0 | 0 | 0 | 0 | 0 | 0 | 0 | hypothetical protein                                            | NA         | NA                                                                   |
| Supercontig_1.14_MV<br>LG_02038_9sp   | -873,94433 | -873,8706  | 0,14746 | 0,07108 | NS | 0 | 0 | 0 | 0 | 0 | 0 | 0 | 0 | 0 | 0 | 0 | 0 | 0 | 0 | 0 | hypothetical protein                                            | PF09801.2  | SYS1(Integral membrane protein S linking to the trans Golgi network) |
| Supercontig_1.33_MV<br>LG_03482_9sp   | -865,88967 | -865,88967 | 0       | 0       | NS | 0 | 0 | 0 | 0 | 0 | 0 | 0 | 0 | 0 | 0 | 0 | 0 | 0 | 0 | 0 | hypothetical protein                                            | NA         | NA                                                                   |
| Supercontig_1.142_MV<br>LG_06710_12sp | -709,66435 | -709,66435 | 0       | 0       | NS | 0 | 0 | 0 | 0 | 0 | 0 | 0 | 0 | 0 | 0 | 0 | 0 | 0 | 0 | 0 | hypothetical protein                                            | NA         | NA                                                                   |

|                                      |            |            |         |         |    |   |   |   |   |                                                 |            |                                                        |
|--------------------------------------|------------|------------|---------|---------|----|---|---|---|---|-------------------------------------------------|------------|--------------------------------------------------------|
| Supercontig_1.15_MV<br>LG_02115_11sp | -286,14248 | -286,14231 | 0,00034 | 0,00017 | NS | 0 | □ | □ | □ | DNA replication<br>licensing factor mcm5        | PF00493.16 | MCM(MCM2/3/5 family)                                   |
| Supercontig_1.29_MV<br>LG_03238_12sp | -645,11795 | -644,97654 | 0,28282 | 0,13187 | NS | 0 | □ | □ | □ | hypothetical protein                            | NA         | NA                                                     |
| Supercontig_1.165_MV<br>LG_06905_9sp | -541,17367 | -540,44886 | 1,44962 | 0,51558 | NS | 0 | □ | □ | □ | hypothetical protein                            | NA         | NA                                                     |
| Supercontig_1.73_MV<br>LG_05435_9sp  | -427,31669 | -427,30199 | 0,0294  | 0,01459 | NS | 0 | □ | □ | □ | hypothetical protein                            | PF06011.5  | TRP(Transient receptor potential<br>(TRP) ion channel) |
| Supercontig_1.3_MVL<br>G_00622_9sp   | -640,13495 | -640,13495 | 0       | 0       | NS | 0 | □ | □ | □ | mannose-1-phosphate<br>guanyltransferase        | PF00483.16 | NTP_transferase(Nucleotidyl<br>transferase)            |
| Supercontig_1.154_MV<br>LG_06803_8sp | -555,76146 | -555,76127 | 0,00038 | 0,00019 | NS | 0 | □ | □ | □ | NAD(P)H-dependent D<br>xylose reductase xyl1    | PF00248.14 | Aldo_ket_red(Aldo/keto<br>reductase family)            |
| Supercontig_1.3_MVL<br>G_00633_10sp  | -737,71739 | -737,66467 | 0,10544 | 0,05135 | NS | 0 | □ | □ | □ | hypothetical protein                            | PF00651.24 | BTB(BTB/POZ domain)                                    |
| Supercontig_1.56_MV<br>LG_04757_10sp | -599,32368 | -599,17703 | 0,2933  | 0,1364  | NS | 0 | □ | □ | □ | hypothetical protein                            | PF00096.19 | zf-C2H2(Zinc finger, C2H2 type)                        |
| Supercontig_1.6_MVL<br>G_01149_10sp  | -485,98452 | -482,61837 | 6,7323  | 0,96548 | ** | 0 | □ | □ | □ | STE/STE11 protein<br>kinase                     | PF07714.10 | Pkinase_Tyr(Protein tyrosine<br>kinase)                |
| Supercontig_1.45_MV<br>LG_04194_10sp | -1062,7232 | -1058,9762 | 7,49398 | 0,97641 | ** | 0 | □ | □ | □ | hypothetical protein                            | PF00169.22 | PH(PH domain)                                          |
| Supercontig_1.55_MV<br>LG_04701_8sp  | -863,40255 | -863,40234 | 0,00042 | 0,00021 | NS | 0 | □ | □ | □ | hypothetical protein                            | PF00324.14 | AA_permease(Amino acid<br>permease)                    |
| Supercontig_1.54_MV<br>LG_04659_7sp  | -403,93483 | -403,88092 | 0,10782 | 0,05248 | NS | 0 | □ | □ | □ | hypothetical protein                            | PF01016.12 | Ribosomal_L27(Ribosomal L27<br>protein)                |
| Supercontig_1.5_MVL<br>G_01015_8sp   | -746,86098 | -746,86098 | 0       | 0       | NS | 0 | □ | □ | □ | hypothetical protein                            | PF05192.11 | MutS_III(MutS domain III)                              |
| Supercontig_1.12_MV<br>LG_01813_8sp  | -1452,3471 | -1452,3471 | 0       | 0       | NS | 0 | □ | □ | □ | hypothetical protein                            | PF09073.3  | BUD22(BUD22)                                           |
| Supercontig_1.77_MV<br>LG_05545_8sp  | -1176,0963 | -1176,0963 | 0       | 0       | NS | 0 | □ | □ | □ | centromere/microtubul<br>e-binding protein cbf5 | TIGR00431  | TIGR00431(TruB: tRNA<br>pseudouridine synthase B)      |
| Supercontig_1.3_MVL<br>G_00528_9sp   | -477,65843 | -474,71928 | 5,8783  | 0,94709 | *  | 0 | □ | □ | □ | hypothetical protein                            | PF04722.6  | Ssu72(Ssu72-like protein)                              |
| Supercontig_1.19_MV<br>LG_02496_8sp  | -278,17674 | -278,1767  | 0,00316 | 0,00316 | NS | 0 | □ | □ | □ | cyanate hydratase                               | TIGR00673  | TIGR00673(cynS: cyanate<br>hydratase)                  |
| Supercontig_1.1_MVL<br>G_00167_8sp   | -373,95523 | -373,88362 | 0,14322 | 0,06911 | NS | 0 | □ | □ | □ | hypothetical protein                            | NA         | NA                                                     |
| Supercontig_1.18_MV<br>LG_02368_7sp  | -2315,0884 | -2314,8293 | 0,51832 | 0,2283  | NS | 0 | □ | □ | □ | hypothetical protein                            | PF01965.17 | DJ-1_Pfp(DJ-1/Pfp family)                              |
| Supercontig_1.7_MVL<br>G_01242_7sp   | -461,0779  | -461,0779  | 0       | 0       | NS | 0 | □ | □ | □ | hypothetical protein                            | NA         | NA                                                     |
| Supercontig_1.28_MV<br>LG_03137_8sp  | -1288,1638 | -1288,1638 | 0       | 0       | NS | 0 | □ | □ | □ | hypothetical protein                            | PF07690.9  | MFS_1(Major Facilitator<br>Superfamily)                |
| Supercontig_1.97_MV<br>LG_06075_10sp | -543,68224 | -543,68153 | 0,00142 | 0,00071 | NS | 0 | □ | □ | □ | nucleolar GTP-binding<br>protein 1              | PF02421.11 | FeoB_N(Ferrous iron transport<br>protein B)            |
| Supercontig_1.1_MVL<br>G_00127_6sp   | -1077,2787 | -1077,2713 | 0,01478 | 0,00736 | NS | 0 | □ | □ | □ | hypothetical protein                            | NA         | NA                                                     |
| Supercontig_1.48_MV<br>LG_04395_7sp  | -738,32515 | -738,30039 | 0,04952 | 0,02446 | NS | 0 | □ | □ | □ | hypothetical protein                            | PF05739.12 | SNARE(SNARE domain)                                    |

|                                      |            |            |         |         |    |   |   |   |   |   |                                                |            |                                                                       |
|--------------------------------------|------------|------------|---------|---------|----|---|---|---|---|---|------------------------------------------------|------------|-----------------------------------------------------------------------|
| Supercontig_1.143_MV<br>LG_06721_6sp | -1072,4081 | -1072,4081 | 0       | 0       | NS | 0 | 0 | 0 | 0 | 0 | CAMK/CAMKL/MARK<br>protein kinase              | PF07714.10 | Pkinase_Tyr(Protein tyrosine<br>kinase)                               |
| Supercontig_1.30_MV<br>LG_03317_8sp  | -552,58308 | -552,61022 | 0       | 0       | NS | 0 | 0 | 0 | 0 | 0 | NAD binding<br>Rossmann fold<br>oxidoreductase | PF01408.15 | GFO_IDH_MocA(Oxidoreductas<br>e family, NAD-binding Rossmann<br>fold) |
| Supercontig_1.4_MVL<br>G_00773_9sp   | -1038,8516 | -1038,8515 | 0,00018 | 0,00316 | NS | 0 | 0 | 0 | 0 | 0 | hypothetical protein                           | TIGR01346  | TIGR01346(isocit_lyase:<br>isocitrate lyase)                          |
| Supercontig_1.4_MVL<br>G_00708_10sp  | -545,6971  | -545,07643 | 1,24134 | 0,46242 | NS | 0 | 0 | 0 | 0 | 0 | hypothetical protein                           | TIGR00745  | TIGR00745(apbA_panE: 2-<br>dehydropantoate 2-reductase)               |
| Supercontig_1.4_MVL<br>G_00688_9sp   | -339,66411 | -339,66404 | 0,00014 | 0,00316 | NS | 0 | 0 | 0 | 0 | 0 | U3 small nucleolar<br>ribonucleoprotein IMP4   | PF04427.11 | Brix(Brix domain)                                                     |
| Supercontig_1.53_MV<br>LG_04628_9sp  | -542,8031  | -542,8031  | 0       | 0       | NS | 0 | 0 | 0 | 0 | 0 | hypothetical protein                           | PF04889.5  | Cwf_Cwc_15(Cwf15/Cwc15 cell<br>cycle control protein)                 |
| Supercontig_1.60_MV<br>LG_04934_7sp  | -931,8306  | -931,8306  | 0       | 0       | NS | 0 | 0 | 0 | 0 | 0 | hypothetical protein                           | PF07859.6  | Abhydrolase_3(alpha/beta<br>hydrolase fold)                           |
| Supercontig_1.3_MVL<br>G_00598_12sp  | -748,71515 | -747,75329 | 1,92372 | 0,61782 | NS | 0 | 0 | 0 | 0 | 0 | hypothetical protein                           | PF07393.4  | Sec10(Exocyst complex<br>component Sec10)                             |
| Supercontig_1.198_MV<br>LG_07078_8sp | -1302,3721 | -1300,9942 | 2,75572 | 0,74788 | NS | 0 | 0 | 0 | 0 | 0 | hypothetical protein                           | PF12146.1  | Hydrolase_4(Putative<br>lysophospholipase)                            |
| Supercontig_1.54_MV<br>LG_04690_10sp | -623,39735 | -623,39735 | 0       | 0       | NS | 0 | 0 | 0 | 0 | 0 | hypothetical protein                           | PF00878.11 | CIMR(Cation-independent<br>mannose-6-phosphate receptor<br>repeat)    |
| Supercontig_1.54_MV<br>LG_04681_7sp  | -400,39833 | -400,3035  | 0,18966 | 0,09047 | NS | 0 | 0 | 0 | 0 | 0 | hypothetical protein                           | PF01428.9  | zf-AN1(AN1-like Zinc finger)                                          |
| Supercontig_1.39_MV<br>LG_03899_8sp  | -656,34301 | -656,31819 | 0,04964 | 0,02451 | NS | 0 | 0 | 0 | 0 | 0 | hypothetical protein                           | PF00249.24 | Myb_DNA-binding(Myb-like DNA-<br>binding domain)                      |
| Supercontig_1.12_MV<br>LG_01821_7sp  | -322,80395 | -322,80395 | 0       | 0       | NS | 0 | 0 | 0 | 0 | 0 | hypothetical protein                           | NA         | NA                                                                    |
| Supercontig_1.88_MV<br>LG_05884_12sp | -357,88046 | -357,88036 | 0,0002  | 0,00316 | NS | 0 | 0 | 0 | 0 | 0 | hypothetical protein                           | PF08613.4  | Cyclin(Cyclin)                                                        |
| Supercontig_1.5_MVL<br>G_00956_8sp   | -430,99761 | -430,99444 | 0,00634 | 0,00316 | NS | 0 | 0 | 0 | 0 | 0 | hypothetical protein                           | PF00106.18 | adh_short(short chain<br>dehydrogenase)                               |
| Supercontig_1.14_MV<br>LG_02007_9sp  | -323,29373 | -322,29687 | 1,99372 | 0,63096 | NS | 0 | 0 | 0 | 0 | 0 | farnesyl<br>pyrophosphate<br>synthase          | PF00348.10 | polyprenyl_synt(Polyprenyl<br>synthetase)                             |
| Supercontig_1.6_MVL<br>G_01151_11sp  | -434,25774 | -433,10115 | 2,31318 | 0,68544 | NS | 0 | 0 | 0 | 0 | 0 | hypothetical protein                           | PF08783.4  | DWNN(DWNN domain)                                                     |
| Supercontig_1.56_MV<br>LG_04776_10sp | -422,35707 | -422,35701 | 0,00012 | 0       | NS | 0 | 0 | 0 | 0 | 0 | MC family<br>mitochondrial carrier<br>protein  | PF00153.20 | Mito_carr(Mitochondrial carrier<br>protein)                           |
| Supercontig_1.4_MVL<br>G_00813_8sp   | -526,94906 | -526,9489  | 0,00032 | 0,00016 | NS | 0 | 0 | 0 | 0 | 0 | hypothetical protein                           | PF01733.11 | Nucleoside_tran(Nucleoside<br>transporter)                            |
| Supercontig_1.57_MV<br>LG_04804_8sp  | -585,39922 | -585,39922 | 0       | 0       | NS | 0 | 0 | 0 | 0 | 0 | hypothetical protein                           | PF11274.1  | DUF3074(Protein of unknown<br>function (DUF3074))                     |
| Supercontig_1.48_MV<br>LG_04384_12sp | -479,87745 | -479,87535 | 0,0042  | 0,0021  | NS | 0 | 0 | 0 | 0 | 0 | hypothetical protein                           | PF00202.14 | Aminotran_3(Aminotransferase<br>class-III)                            |
| Supercontig_1.102_MV<br>LG_06170_9sp | -787,22863 | -785,91908 | 2,6191  | 0,73006 | NS | 0 | 0 | 0 | 0 | 0 | hypothetical protein                           | NA         | NA                                                                    |
| Supercontig_1.10_MV<br>LG_01653_9sp  | -1063,2559 | -1062,4281 | 1,65556 | 0,56298 | NS | 0 | 0 | 0 | 0 | 0 | hypothetical protein                           | NA         | NA                                                                    |

|                                      |            |            |         |         |    |   |  |  |  |  |                                                       |            |                                                                                    |
|--------------------------------------|------------|------------|---------|---------|----|---|--|--|--|--|-------------------------------------------------------|------------|------------------------------------------------------------------------------------|
| Supercontig_1.19_MV<br>LG_02500_7sp  | -549,48675 | -549,48675 | 0       | 0       | NS | 0 |  |  |  |  | hypothetical protein                                  | PF01532.13 | Glyco_hydro_47(Glycosyl<br>hydrolase family 47)                                    |
| Supercontig_1.30_MV<br>LG_03324_10sp | -659,78731 | -659,78731 | 0       | 0       | NS | 0 |  |  |  |  | hypothetical protein                                  | NA         | NA                                                                                 |
| Supercontig_1.7_MVL<br>G_01340_6sp   | -912,20098 | -912,20098 | 0       | 0       | NS | 0 |  |  |  |  | hypothetical protein                                  | PF04564.8  | U-box(U-box domain)                                                                |
| Supercontig_1.98_MV<br>LG_06089_9sp  | -404,39238 | -404,39238 | 0       | 0       | NS | 0 |  |  |  |  | hypothetical protein                                  | PF00026.16 | Asp(Eukaryotic aspartyl<br>protease)                                               |
| Supercontig_1.27_MV<br>LG_03088_8sp  | -488,88644 | -488,74092 | 0,29104 | 0,13543 | NS | 0 |  |  |  |  | hypothetical protein                                  | NA         | NA                                                                                 |
| Supercontig_1.7_MVL<br>G_01335_8sp   | -398,3108  | -396,70787 | 3,20586 | 0,79869 | NS | 0 |  |  |  |  | hypothetical protein                                  | PF08613.4  | Cyclin(Cyclin)                                                                     |
| Supercontig_1.4_MVL<br>G_00839_10sp  | -676,77779 | -675,529   | 2,49758 | 0,71315 | NS | 0 |  |  |  |  | hypothetical protein                                  | NA         | NA                                                                                 |
| Supercontig_1.80_MV<br>LG_05638_11sp | -612,92719 | -612,92719 | 0       | 0       | NS | 0 |  |  |  |  | phenylalanyl-tRNA<br>synthetase                       | PF03147.7  | FDX-ACB(Ferredoxin-fold<br>anticodon binding domain)                               |
| Supercontig_1.21_MV<br>LG_02625_9sp  | -906,65982 | -905,33464 | 2,65036 | 0,73424 | NS | 0 |  |  |  |  | hypothetical protein                                  | PF00018.21 | SH3_1(SH3 domain)                                                                  |
| Supercontig_1.1_MVL<br>G_00048_8sp   | -875,45714 | -875,34618 | 0,22192 | 0,10503 | NS | 0 |  |  |  |  | hypothetical protein                                  | PF01399.20 | PCI(PCI domain)                                                                    |
| Supercontig_1.27_MV<br>LG_03090_8sp  | -947,0247  | -947,02193 | 0,00554 | 0,00277 | NS | 0 |  |  |  |  | hypothetical protein                                  | NA         | NA                                                                                 |
| Supercontig_1.59_MV<br>LG_04899_10sp | -688,49571 | -688,49543 | 0,00056 | 0,00028 | NS | 0 |  |  |  |  | hypothetical protein                                  | PF08354.3  | DUF1729(Domain of unknown<br>function (DUF1729))                                   |
| Supercontig_1.73_MV<br>LG_05410_7sp  | -395,09745 | -395,09745 | 0       | 0       | NS | 0 |  |  |  |  | hypothetical protein                                  | PF00254.21 | FKBP_C(FKBP-type peptidyl-<br>prolyl cis-trans isomerase)                          |
| Supercontig_1.23_MV<br>LG_02827_10sp | -680,07196 | -680,07196 | 0       | 0       | NS | 0 |  |  |  |  | calcium-transporting P-<br>type ATPase, PMR1-<br>type | TIGR01494  | TIGR01494(ATPase_P-type:<br>HAD ATPase, P-type, family IC)                         |
| Supercontig_1.39_MV<br>LG_03832_12sp | -560,56902 | -560,56902 | 0       | 0       | NS | 0 |  |  |  |  | hypothetical protein                                  | PF01697.20 | DUF23(Domain of unknown<br>function)                                               |
| Supercontig_1.8_MVL<br>G_01389_9sp   | -529,04422 | -529,04413 | 0,00018 | 0       | NS | 0 |  |  |  |  | CMGC/MAPK protein<br>kinase                           | PF07714.10 | Pkinase_Tyr(Protein tyrosine<br>kinase)                                            |
| Supercontig_1.21_MV<br>LG_02670_7sp  | -889,12335 | -889,12335 | 0       | 0       | NS | 0 |  |  |  |  | dynammin GTPase                                       | PF00350.16 | Dynammin_N(Dynammin family)                                                        |
| Supercontig_1.46_MV<br>LG_04251_9sp  | -648,26426 | -648,22097 | 0,08658 | 0,04237 | NS | 0 |  |  |  |  | hypothetical protein                                  | PF00005.20 | ABC_tran(ABC transporter)                                                          |
| Supercontig_1.34_MV<br>LG_03561_7sp  | -953,03014 | -952,25848 | 1,54332 | 0,53775 | NS | 0 |  |  |  |  | hypothetical protein                                  | PF12328.1  | Rpp20(Rpp20 subunit of nuclear<br>RNase MRP and P)                                 |
| Supercontig_1.63_MV<br>LG_05087_6sp  | -1130,9665 | -1130,9665 | 0       | 0       | NS | 0 |  |  |  |  | hypothetical protein                                  | TIGR00071  | TIGR00071(hisT_truA: tRNA<br>pseudouridine synthase A)                             |
| Supercontig_1.22_MV<br>LG_02684_9sp  | -631,54516 | -631,54514 | 0       | 0       | NS | 0 |  |  |  |  | hypothetical protein                                  | PF00383.15 | dCMP_cyt_deam_1(Cytidine and<br>deoxycytidylate deaminase zinc-<br>binding region) |
| Supercontig_1.239_MV<br>LG_07200_8sp | -1068,4365 | -1068,4365 | 0       | 0       | NS | 0 |  |  |  |  | hypothetical protein                                  | NA         | NA                                                                                 |
| Supercontig_1.97_MV<br>LG_06066_8sp  | -550,2599  | -550,2599  | 0       | 0       | NS | 0 |  |  |  |  | hypothetical protein                                  | PF03909.10 | BSD(BSD domain)                                                                    |
| Supercontig_1.39_MV<br>LG_03872_10sp | -738,64609 | -737,61284 | 2,0665  | 0,64415 | NS | 0 |  |  |  |  | hypothetical protein                                  | PF04148.6  | Erv26(Transmembrane adaptor<br>Erv26)                                              |

|                                      |            |            |         |         |    |   |   |   |   |   |   |   |   |   |                                         |            |                                                      |
|--------------------------------------|------------|------------|---------|---------|----|---|---|---|---|---|---|---|---|---|-----------------------------------------|------------|------------------------------------------------------|
| Supercontig_1.46_MV<br>LG_04275_11sp | -661,98305 | -661,98305 | 0       | 0       | NS | 0 | 0 | 0 | 0 | 0 | 0 | 0 | 0 | 0 | hypothetical protein                    | PF07859.6  | Abhydrolase_3(alpha/beta hydrolase fold)             |
| Supercontig_1.32_MV<br>LG_03436_8sp  | -768,06466 | -768,06466 | 0       | 0       | NS | 0 | 0 | 0 | 0 | 0 | 0 | 0 | 0 | 0 | hypothetical protein                    | PF00400.25 | WD40(WD domain, G-beta repeat)                       |
| Supercontig_1.7_MVL<br>G_01228_6sp   | -693,915   | -693,86324 | 0,10352 | 0,05044 | NS | 0 | 0 | 0 | 0 | 0 | 0 | 0 | 0 | 0 | hypothetical protein                    | PF00443.22 | UCH(Ubiquitin carboxyl-terminal hydrolase)           |
| Supercontig_1.18_MV<br>LG_02375_9sp  | -1022,3794 | -1020,9704 | 2,81784 | 0,75559 | NS | 0 | 0 | 0 | 0 | 0 | 0 | 0 | 0 | 0 | hypothetical protein                    | NA         | NA                                                   |
| Supercontig_1.82_MV<br>LG_05721_6sp  | -1840,9917 | -1840,9917 | 0       | 0       | NS | 0 | 0 | 0 | 0 | 0 | 0 | 0 | 0 | 0 | hypothetical protein                    | PF02213.9  | GYF(GYF domain)                                      |
| Supercontig_1.7_MVL<br>G_01262_7sp   | -636,94725 | -635,14994 | 3,59462 | 0,83426 | NS | 0 | 0 | 0 | 0 | 0 | 0 | 0 | 0 | 0 | hypothetical protein                    | PF01997.9  | Translin(Translin family)                            |
| Supercontig_1.66_MV<br>LG_05172_7sp  | -594,00676 | -593,81339 | 0,38674 | 0,17582 | NS | 0 | 0 | 0 | 0 | 0 | 0 | 0 | 0 | 0 | hypothetical protein                    | NA         | NA                                                   |
| Supercontig_1.12_MV<br>LG_01879_7sp  | -526,16969 | -526,08141 | 0,17656 | 0,0845  | NS | 0 | 0 | 0 | 0 | 0 | 0 | 0 | 0 | 0 | hypothetical protein                    | PF01170.11 | UPF0020(Putative RNA methylase family UPF0020)       |
| Supercontig_1.85_MV<br>LG_05812_11sp | -390,25644 | -390,22247 | 0,06794 | 0,0334  | NS | 0 | 0 | 0 | 0 | 0 | 0 | 0 | 0 | 0 | hypothetical protein                    | NA         | NA                                                   |
| Supercontig_1.40_MV<br>LG_03930_10sp | -462,54708 | -462,54707 | 0       | 0       | NS | 0 | 0 | 0 | 0 | 0 | 0 | 0 | 0 | 0 | hypothetical protein                    | PF07933.7  | DUF1681(Protein of unknown function (DUF1681))       |
| Supercontig_1.34_MV<br>LG_03545_6sp  | -974,14722 | -974,14722 | 0       | 0       | NS | 0 | 0 | 0 | 0 | 0 | 0 | 0 | 0 | 0 | hypothetical protein                    | PF00125.17 | Histone(Core histone H2A/H2B/H3/H4)                  |
| Supercontig_1.88_MV<br>LG_05889_9sp  | -477,00963 | -477,00957 | 0       | 0       | NS | 0 | 0 | 0 | 0 | 0 | 0 | 0 | 0 | 0 | mitochondrial GTP/GDP carrier protein 1 | PF00153.20 | Mito_carr(Mitochondrial carrier protein)             |
| Supercontig_1.82_MV<br>LG_05723_9sp  | -683,72865 | -682,68844 | 2,08042 | 0,64662 | NS | 0 | 0 | 0 | 0 | 0 | 0 | 0 | 0 | 0 | hypothetical protein                    | NA         | NA                                                   |
| Supercontig_1.12_MV<br>LG_01837_7sp  | -463,93779 | -463,93779 | 0       | 0       | NS | 0 | 0 | 0 | 0 | 0 | 0 | 0 | 0 | 0 | T-complex protein 1 subunit eta         | PF00118.17 | Cpn60_TCP1(TCP-1/cpn60 chaperonin family)            |
| Supercontig_1.70_MV<br>LG_05333_8sp  | -679,7153  | -679,14949 | 1,13162 | 0,4321  | NS | 0 | 0 | 0 | 0 | 0 | 0 | 0 | 0 | 0 | hypothetical protein                    | PF06775.7  | Seipin(Putative adipose-regulatory protein (Seipin)) |
| Supercontig_1.6_MVL<br>G_01113_10sp  | -1360,0872 | -1360,0872 | 0       | 0       | NS | 0 | 0 | 0 | 0 | 0 | 0 | 0 | 0 | 0 | elongation factor EF-3                  | PF00005.20 | ABC_tran(ABC transporter)                            |
| Supercontig_1.41_MV<br>LG_04038_8sp  | -522,7198  | -522,71976 | 0       | 0       | NS | 0 | 0 | 0 | 0 | 0 | 0 | 0 | 0 | 0 | hypothetical protein                    | PF01351.11 | RNase_HII(Ribonuclease HII)                          |
| Supercontig_1.3_MVL<br>G_00509_6sp   | -1004,8176 | -1004,8176 | 0       | 0       | NS | 0 | 0 | 0 | 0 | 0 | 0 | 0 | 0 | 0 | hypothetical protein                    | PF00753.20 | Lactamase_B(Metallo-beta-lactamase superfamily)      |
| Supercontig_1.5_MVL<br>G_00924_7sp   | -524,49533 | -524,49533 | 0       | 0       | NS | 0 | 0 | 0 | 0 | 0 | 0 | 0 | 0 | 0 | hypothetical protein                    | PF00636.19 | Ribonuclease_3(RNase3 domain)                        |
| Supercontig_1.80_MV<br>LG_05657_9sp  | -625,21706 | -625,21706 | 0       | 0       | NS | 0 | 0 | 0 | 0 | 0 | 0 | 0 | 0 | 0 | hypothetical protein                    | PF04434.10 | SWIM(SWIM zinc finger)                               |
| Supercontig_1.2_MVL<br>G_00429_9sp   | -796,465   | -796,44097 | 0,04806 | 0,02374 | NS | 0 | 0 | 0 | 0 | 0 | 0 | 0 | 0 | 0 | hypothetical protein                    | NA         | NA                                                   |
| Supercontig_1.4_MVL<br>G_00716_7sp   | -615,22814 | -615,22733 | 0,00162 | 0,00081 | NS | 0 | 0 | 0 | 0 | 0 | 0 | 0 | 0 | 0 | hypothetical protein                    | NA         | NA                                                   |
| Supercontig_1.8_MVL<br>G_01459_10sp  | -1254,6636 | -1254,6636 | 0       | 0       | NS | 0 | 0 | 0 | 0 | 0 | 0 | 0 | 0 | 0 | hypothetical protein                    | PF06818.8  | Fez1(Fez1)                                           |
| Supercontig_1.78_MV<br>LG_05595_10sp | -388,84673 | -388,84673 | 0       | 0       | NS | 0 | 0 | 0 | 0 | 0 | 0 | 0 | 0 | 0 | hypothetical protein                    | PF11790.1  | Glyco_hydro_cc(Glycosyl hydrolase catalytic core)    |
| Supercontig_1.7_MVL<br>G_01317_9sp   | -380,65878 | -379,03498 | 3,2476  | 0,80285 | NS | 0 | 0 | 0 | 0 | 0 | 0 | 0 | 0 | 0 | hypothetical protein                    | PF12449.1  | DUF3684(Protein of unknown function (DUF3684))       |



|                                       |            |            |         |         |    |   |   |   |   |                                                  |            |                                                                |
|---------------------------------------|------------|------------|---------|---------|----|---|---|---|---|--------------------------------------------------|------------|----------------------------------------------------------------|
| Supercontig_1.33_MV<br>LG_03464_10sp  | -805,73715 | -805,73689 | 0,00052 | 0,00026 | NS | 0 | 0 | 0 | 0 | hypothetical protein                             | PF00400.25 | WD40(WD domain, G-beta repeat)                                 |
| Supercontig_1.26_MV<br>LG_03004_10sp  | -375,2079  | -375,20786 | 0       | 0       | NS | 0 | 0 | 0 | 0 | hypothetical protein                             | PF00628.22 | PHD(PHD-finger)                                                |
| Supercontig_1.15_MV<br>LG_02072_7sp   | -505,68827 | -505,68827 | 0       | 0       | NS | 0 | 0 | 0 | 0 | hypothetical protein                             | PF03171.13 | 2OG-FelI_Oxy(2OG-Fe(II) oxygenase superfamily)                 |
| Supercontig_1.52_MV<br>LG_04558_9sp   | -803,77412 | -803,77391 | 0,00042 | 0,00021 | NS | 0 | 0 | 0 | 0 | hypothetical protein                             | TIGR00614  | TIGR00614(recQ_fam: ATP-dependent DNA helicase, RecQ family)   |
| Supercontig_1.1_MVL<br>G_00168_9sp    | -656,64399 | -656,62199 | 0,044   | 0,02176 | NS | 0 | 0 | 0 | 0 | hypothetical protein                             | PF02891.13 | zf-MIZ(MIZ/SP-RING zinc finger)                                |
| Supercontig_1.87_MV<br>LG_05863_12sp  | -708,90763 | -708,90763 | 0       | 0       | NS | 0 | 0 | 0 | 0 | CMGC/DYRK/YAK protein kinase                     | PF07714.10 | Pkinase_Tyr(Protein tyrosine kinase)                           |
| Supercontig_1.99_MV<br>LG_06121_8sp   | -340,07869 | -339,6234  | 0,91058 | 0,36574 | NS | 0 | 0 | 0 | 0 | hypothetical protein                             | NA         | NA                                                             |
| Supercontig_1.15_MV<br>LG_02087_8sp   | -662,49107 | -662,49087 | 0,0004  | 0,0002  | NS | 0 | 0 | 0 | 0 | succinyl-CoA:3-ketoacid-coenzyme A transferase 1 | TIGR02429  | TIGR02429(pcal_scoA_fam: 3-oxoacid CoA-transferase, A subunit) |
| Supercontig_1.2_MVL<br>G_00452_9sp    | -445,51138 | -445,51138 | 0       | 0       | NS | 0 | 0 | 0 | 0 | hypothetical protein                             | PF04097.7  | Nic96(Nup93/Nic96)                                             |
| Supercontig_1.64_MV<br>LG_05100_11sp  | -1176,7853 | -1176,7853 | 0       | 0       | NS | 0 | 0 | 0 | 0 | hypothetical protein                             | PF00176.16 | SNF2_N(SNF2 family N-terminal domain)                          |
| Supercontig_1.2_MVL<br>G_00410_11sp   | -379,54626 | -379,54525 | 0,00202 | 0,00101 | NS | 0 | 0 | 0 | 0 | hypothetical protein                             | NA         | NA                                                             |
| Supercontig_1.36_MV<br>LG_03691_10sp  | -302,61474 | -302,61473 | 0       | 0       | NS | 0 | 0 | 0 | 0 | hypothetical protein                             | NA         | NA                                                             |
| Supercontig_1.2_MVL<br>G_00341_10sp   | -1132,9984 | -1131,8044 | 2,3879  | 0,69698 | NS | 0 | 0 | 0 | 0 | hypothetical protein                             | PF01412.11 | ArfGap(Putative GTPase activating protein for Arf)             |
| Supercontig_1.2_MVL<br>G_00486_7sp    | -459,40421 | -459,40421 | 0       | 0       | NS | 0 | 0 | 0 | 0 | hypothetical protein                             | NA         | NA                                                             |
| Supercontig_1.15_MV<br>LG_02111_10sp  | -640,33617 | -640,33617 | 0       | 0       | NS | 0 | 0 | 0 | 0 | hypothetical protein                             | PF00642.17 | zf-CCCH(Zinc finger C-x8-C-x5-C-x3-H type (and similar))       |
| Supercontig_1.46_MV<br>LG_04269_10sp  | -557,38024 | -557,38024 | 0       | 0       | NS | 0 | 0 | 0 | 0 | hypothetical protein                             | PF01965.17 | DJ-1_Pfp(DJ-1/Pfp family)                                      |
| Supercontig_1.27_MV<br>LG_03113_6sp   | -707,55376 | -707,26419 | 0,57914 | 0,25141 | NS | 0 | 0 | 0 | 0 | hypothetical protein                             | NA         | NA                                                             |
| Supercontig_1.65_MV<br>LG_05143_10sp  | -508,41323 | -508,41314 | 0,00018 | 0       | NS | 0 | 0 | 0 | 0 | hypothetical protein                             | NA         | NA                                                             |
| Supercontig_1.27_MV<br>LG_03115_9sp   | -652,556   | -652,556   | 0       | 0       | NS | 0 | 0 | 0 | 0 | hypothetical protein                             | PF08238.5  | Sel1(Sel1 repeat)                                              |
| Supercontig_1.63_MV<br>LG_05066_9sp   | -1240,3133 | -1240,3133 | 0       | 0       | NS | 0 | 0 | 0 | 0 | hypothetical protein                             | NA         | NA                                                             |
| Supercontig_1.1_MVL<br>G_00162_7sp    | -1261,3503 | -1258,9166 | 4,86748 | 0,91229 | *  | 0 | 0 | 0 | 0 | hypothetical protein                             | NA         | NA                                                             |
| Supercontig_1.13_MV<br>LG_01947_7sp   | -2420,7516 | -2420,7516 | 0       | 0       | NS | 0 | 0 | 0 | 0 | hypothetical protein                             | PF00664.16 | ABC_membrane(ABC transporter transmembrane region)             |
| Supercontig_1.65_MV<br>LG_05128_10sp  | -471,18665 | -471,18646 | 0,00038 | 0,00019 | NS | 0 | 0 | 0 | 0 | hypothetical protein                             | PF00933.14 | Glyco_hydro_3(Glycosyl hydrolase family 3 N terminal domain)   |
| Supercontig_1.198_MV<br>LG_07076_11sp | -565,33995 | -565,33968 | 0,00054 | 0,00027 | NS | 0 | 0 | 0 | 0 | hypothetical protein                             | NA         | NA                                                             |

|                                      |            |            |         |         |    |   |  |  |  |  |                                                              |            |                                                                                                          |
|--------------------------------------|------------|------------|---------|---------|----|---|--|--|--|--|--------------------------------------------------------------|------------|----------------------------------------------------------------------------------------------------------|
| Supercontig_1.1_MVL<br>G_00081_9sp   | -453,04708 | -453,04706 | 0       | 0       | NS | 0 |  |  |  |  | hypothetical protein                                         | PF04064.6  | DUF384(Domain of unknown function (DUF384))                                                              |
| Supercontig_1.32_MV<br>LG_03405_11sp | -834,26206 | -834,26206 | 0       | 0       | NS | 0 |  |  |  |  | hypothetical protein                                         | PF01408.15 | GFO_IDH_MocA(Oxidoreductase family, NAD-binding Rossmann fold)                                           |
| Supercontig_1.1_MVL<br>G_00064_12sp  | -555,89805 | -555,21792 | 1,36026 | 0,49345 | NS | 0 |  |  |  |  | hypothetical protein                                         | NA         | NA                                                                                                       |
| Supercontig_1.36_MV<br>LG_03681_7sp  | -364,05683 | -364,05676 | 0,00014 | 0       | NS | 0 |  |  |  |  | threonyl-tRNA synthetase, cytoplasmic                        | TIGR00418  | TIGR00418(thrS: threonine--tRNA ligase)                                                                  |
| Supercontig_1.38_MV<br>LG_03811_10sp | -575,38653 | -575,38653 | 0       | 0       | NS | 0 |  |  |  |  | hypothetical protein                                         | PF07690.9  | MFS_1(Major Facilitator Superfamily)                                                                     |
| Supercontig_1.11_MV<br>LG_01734_9sp  | -447,45372 | -447,45355 | 0,00034 | 0,00017 | NS | 0 |  |  |  |  | hypothetical protein                                         | PF02383.11 | Syja_N(SacI homology domain)                                                                             |
| Supercontig_1.48_MV<br>LG_04399_10sp | -412,03368 | -412,03368 | 0       | 0       | NS | 0 |  |  |  |  | hypothetical protein                                         | PF03452.7  | Anp1(Anp1)                                                                                               |
| Supercontig_1.6_MVL<br>G_01057_10sp  | -624,60801 | -624,60145 | 0,01312 | 0,00654 | NS | 0 |  |  |  |  | hypothetical protein                                         | TIGR00711  | TIGR00711(efflux_EmrB: drug resistance MFS transporter, drug:H+ antiporter-2 (14 Spanner) (DHA2) family) |
| Supercontig_1.80_MV<br>LG_05661_11sp | -460,04952 | -460,04906 | 0,00092 | 0,00046 | NS | 0 |  |  |  |  | hypothetical protein                                         | PF00240.16 | ubiquitin(Ubiquitin family)                                                                              |
| Supercontig_1.34_MV<br>LG_03553_10sp | -553,00949 | -553,0088  | 0,00138 | 0,00069 | NS | 0 |  |  |  |  | serine/threonine-protein phosphatase 2B catalytic subunit A1 | PF00149.21 | Metallophos(Calcineurin-like phosphoesterase)                                                            |
| Supercontig_1.3_MVL<br>G_00570_9sp   | -428,27701 | -428,27699 | 0       | 0       | NS | 0 |  |  |  |  | hypothetical protein                                         | NA         | NA                                                                                                       |
| Supercontig_1.73_MV<br>LG_05411_6sp  | -459,87387 | -459,70035 | 0,34704 | 0,1593  | NS | 0 |  |  |  |  | hypothetical protein                                         | TIGR01489  | TIGR01489(DKMTTPase-SF: 2,3-diketo-5-methylthio-1-phosphopentane phosphatase)                            |
| Supercontig_1.3_MVL<br>G_00590_6sp   | -843,9019  | -843,9019  | 0       | 0       | NS | 0 |  |  |  |  | hypothetical protein                                         | PF00067.15 | p450(Cytochrome P450)                                                                                    |
| Supercontig_1.33_MV<br>LG_03489_12sp | -390,89919 | -389,77559 | 2,2472  | 0,67489 | NS | 0 |  |  |  |  | hypothetical protein                                         | PF01764.18 | Lipase_3(Lipase (class 3))                                                                               |
| Supercontig_1.46_MV<br>LG_04295_9sp  | -645,01814 | -645,01808 | 0,00012 | 0       | NS | 0 |  |  |  |  | hypothetical protein                                         | PF00022.12 | Actin(Actin)                                                                                             |
| Supercontig_1.170_MV<br>LG_06942_7sp | -507,41541 | -506,58651 | 1,6578  | 0,56347 | NS | 0 |  |  |  |  | hypothetical protein                                         | NA         | NA                                                                                                       |
| Supercontig_1.16_MV<br>LG_02187_11sp | -596,59227 | -596,59227 | 0       | 0       | NS | 0 |  |  |  |  | hypothetical protein                                         | PF03062.12 | MBOAT(MBOAT family)                                                                                      |
| Supercontig_1.25_MV<br>LG_02960_11sp | -342,64265 | -342,64265 | 0       | 0       | NS | 0 |  |  |  |  | hypothetical protein                                         | PF04099.5  | Sybindin(Sybindin-like family)                                                                           |
| Supercontig_1.57_MV<br>LG_04811_12sp | -711,33675 | -711,28842 | 0,09666 | 0,04718 | NS | 0 |  |  |  |  | hypothetical protein                                         | PF08729.3  | HPC2(Histone promoter control 2 (HPC2))                                                                  |
| Supercontig_1.29_MV<br>LG_03249_9sp  | -1127,0526 | -1127,0526 | 0       | 0       | NS | 0 |  |  |  |  | hypothetical protein                                         | NA         | NA                                                                                                       |
| Supercontig_1.11_MV<br>LG_01784_9sp  | -320,21416 | -320,21414 | 0       | 0       | NS | 0 |  |  |  |  | hypothetical protein                                         | PF07571.6  | DUF1546(Protein of unknown function (DUF1546))                                                           |
| Supercontig_1.74_MV<br>LG_05445_10sp | -403,36235 | -401,04686 | 4,63098 | 0,90128 | *  | 0 |  |  |  |  | hypothetical protein                                         | PF04401.7  | DUF540(Protein of unknown function (DUF540))                                                             |

|                                       |            |            |         |         |    |   |   |   |   |   |                      |            |                                                                    |
|---------------------------------------|------------|------------|---------|---------|----|---|---|---|---|---|----------------------|------------|--------------------------------------------------------------------|
| Supercontig_1.66_MV<br>LG_05193_10sp  | -353,72087 | -353,72074 | 0,00026 | 0,00013 | NS | 0 | □ | □ | □ | □ | hypothetical protein | NA         | NA                                                                 |
| Supercontig_1.140_MV<br>LG_06681_9sp  | -595,18137 | -595,18114 | 0,00046 | 0,00023 | NS | 0 | □ | □ | □ | □ | hypothetical protein | PF01423.15 | LSM(LSM domain)                                                    |
| Supercontig_1.18_MV<br>LG_02421_10sp  | -437,22448 | -436,88136 | 0,68624 | 0,29045 | NS | 0 | □ | □ | □ | □ | hypothetical protein | PF02900.11 | LigB(Catalytic LigB subunit of aromatic ring-opening dioxygenase)  |
| Supercontig_1.14_MV<br>LG_02050_7sp   | -739,93285 | -739,93285 | 0       | 0       | NS | 0 | □ | □ | □ | □ | hypothetical protein | NA         | NA                                                                 |
| Supercontig_1.40_MV<br>LG_03956_10sp  | -648,69204 | -648,43228 | 0,51952 | 0,22876 | NS | 0 | □ | □ | □ | □ | hypothetical protein | NA         | NA                                                                 |
| Supercontig_1.47_MV<br>LG_04308_10sp  | -667,14469 | -666,86856 | 0,55226 | 0,24129 | NS | 0 | □ | □ | □ | □ | hypothetical protein | NA         | NA                                                                 |
| Supercontig_1.12_MV<br>LG_01866_7sp   | -660,59081 | -660,5904  | 0,00082 | 0,00041 | NS | 0 | □ | □ | □ | □ | hypothetical protein | PF02889.9  | Sec63(Sec63 Brl domain)                                            |
| Supercontig_1.66_MV<br>LG_05163_9sp   | -357,09842 | -356,95599 | 0,28486 | 0,13275 | NS | 0 | □ | □ | □ | □ | hypothetical protein | PF08530.3  | PepX_C(X-Pro dipeptidyl-peptidase C-terminal non-catalytic domain) |
| Supercontig_1.64_MV<br>LG_05114_8sp   | -531,54983 | -530,26909 | 2,56148 | 0,72217 | NS | 0 | □ | □ | □ | □ | hypothetical protein | TIGR00907  | TIGR00907(2A0304: amino acid permease)                             |
| Supercontig_1.24_MV<br>LG_02899_8sp   | -708,41566 | -708,41558 | 0,00016 | 0       | NS | 0 | □ | □ | □ | □ | hypothetical protein | NA         | NA                                                                 |
| Supercontig_1.50_MV<br>LG_04452_9sp   | -700,3931  | -700,3931  | 0       | 0       | NS | 0 | □ | □ | □ | □ | hypothetical protein | PF05871.5  | ESCRT-II(ESCRT-II complex subunit)                                 |
| Supercontig_1.32_MV<br>LG_03392_7sp   | -878,81466 | -878,81466 | 0       | 0       | NS | 0 | □ | □ | □ | □ | hypothetical protein | PF00856.21 | SET(SET domain)                                                    |
| Supercontig_1.32_MV<br>LG_03407_8sp   | -386,35406 | -383,21294 | 6,28224 | 0,95677 | ** | 0 | □ | □ | □ | □ | hypothetical protein | NA         | NA                                                                 |
| Supercontig_1.102_MV<br>LG_06179_9sp  | -400,11999 | -400,11997 | 0       | 0       | NS | 0 | □ | □ | □ | □ | hypothetical protein | NA         | NA                                                                 |
| Supercontig_1.41_MV<br>LG_03981_7sp   | -538,72053 | -538,72029 | 0       | 0       | NS | 0 | □ | □ | □ | □ | nucleolar protein 58 | PF08156.6  | NOP5NT(NOP5NT (NUC127) domain)                                     |
| Supercontig_1.16_MV<br>LG_02175_6sp   | -278,68518 | -278,6851  | 0       | 0       | NS | 0 | □ | □ | □ | □ | hypothetical protein | TIGR01126  | TIGR01126(pdi_dom: protein disulfide-isomerase domain)             |
| Supercontig_1.51_MV<br>LG_04502_10sp  | -600,63552 | -600,63552 | 0       | 0       | NS | 0 | □ | □ | □ | □ | hypothetical protein | PF03407.9  | Nucleotid_trans(Nucleotide-diphospho-sugar transferase)            |
| Supercontig_1.53_MV<br>LG_04613_9sp   | -667,21088 | -667,21088 | 0       | 0       | NS | 0 | □ | □ | □ | □ | hypothetical protein | NA         | NA                                                                 |
| Supercontig_1.1_MVL<br>G_00010_10sp   | -590,73061 | -590,73061 | 0       | 0       | NS | 0 | □ | □ | □ | □ | hypothetical protein | PF03248.6  | Rer1(Rer1 family)                                                  |
| Supercontig_1.58_MV<br>LG_04853_10sp  | -660,12612 | -660,12098 | 0,01028 | 0,00513 | NS | 0 | □ | □ | □ | □ | hypothetical protein | NA         | NA                                                                 |
| Supercontig_1.3_MVL<br>G_00603_8sp    | -439,73891 | -439,7388  | 0,00022 | 0,00011 | NS | 0 | □ | □ | □ | □ | rab family, other    | PF08477.6  | Miro(Miro-like protein)                                            |
| Supercontig_1.121_MV<br>LG_06439_12sp | -414,76567 | -412,82911 | 3,87312 | 0,8558  | NS | 0 | □ | □ | □ | □ | hypothetical protein | PF05739.12 | SNARE(SNARE domain)                                                |
| Supercontig_1.20_MV<br>LG_02587_9sp   | -968,1843  | -968,1843  | 0       | 0       | NS | 0 | □ | □ | □ | □ | hypothetical protein | PF07716.8  | bZIP_2(Basic region leucine zipper)                                |
| Supercontig_1.7_MVL<br>G_01294_8sp    | -1107,4385 | -1107,4385 | 0       | 0       | NS | 0 | □ | □ | □ | □ | hypothetical protein | PF02585.10 | PIG-L(GlcNAc-PI de-N-acetylase)                                    |



|                                       |            |            |         |         |    |   |  |  |  |  |                                           |            |                                                                  |
|---------------------------------------|------------|------------|---------|---------|----|---|--|--|--|--|-------------------------------------------|------------|------------------------------------------------------------------|
| Supercontig_1.16_MV<br>LG_02168_6sp   | -565,41725 | -565,4172  | 0       | 0       | NS | 0 |  |  |  |  | hypothetical protein                      | PF00179.19 | UQ_con(Ubiquitin-conjugating enzyme)                             |
| Supercontig_1.19_MV<br>LG_02479_7sp   | -371,63964 | -371,53553 | 0,20822 | 0,09887 | NS | 0 |  |  |  |  | cytoplasm protein                         | PF02421.11 | FeoB_N(Ferrous iron transport protein B)                         |
| Supercontig_1.32_MV<br>LG_03411_7sp   | -791,37204 | -790,17637 | 2,39134 | 0,6975  | NS | 0 |  |  |  |  | hypothetical protein                      | NA         | NA                                                               |
| Supercontig_1.22_MV<br>LG_02722_11sp  | -300,66342 | -300,66337 | 0       | 0       | NS | 0 |  |  |  |  | 60S ribosomal protein L16                 | TIGR01077  | TIGR01077(L13_A_E: ribosomal protein L13)                        |
| Supercontig_1.20_MV<br>LG_02528_10sp  | -693,18427 | -691,69948 | 2,96958 | 0,77345 | NS | 0 |  |  |  |  | hypothetical protein                      | PF02902.12 | Peptidase_C48(Ulp1 protease family, C-terminal catalytic domain) |
| Supercontig_1.4_MVL<br>G_00732_8sp    | -545,90539 | -545,90533 | 0,00012 | 0       | NS | 0 |  |  |  |  | hypothetical protein                      | PF00270.22 | DEAD(DEAD/DEAH box helicase)                                     |
| Supercontig_1.104_MV<br>LG_06200_10sp | -1464,2826 | -1464,2823 | 0,00064 | 0,00032 | NS | 0 |  |  |  |  | 2-oxoglutarate dehydrogenase              | PF00676.13 | E1_dh(Dehydrogenase E1 component)                                |
| Supercontig_1.35_MV<br>LG_03625_7sp   | -1693,6242 | -1693,4138 | 0,4208  | 0,18974 | NS | 0 |  |  |  |  | hypothetical protein                      | NA         | NA                                                               |
| Supercontig_1.30_MV<br>LG_03257_10sp  | -1188,1769 | -1186,5636 | 3,2267  | 0,80078 | NS | 0 |  |  |  |  | hypothetical protein                      | PF00018.21 | SH3_1(SH3 domain)                                                |
| Supercontig_1.9_MVL<br>G_01505_10sp   | -1179,3828 | -1179,3828 | 0       | 0       | NS | 0 |  |  |  |  | hypothetical protein                      | NA         | NA                                                               |
| Supercontig_1.12_MV<br>LG_01854_10sp  | -553,24713 | -553,15889 | 0,17648 | 0,08446 | NS | 0 |  |  |  |  | hypothetical protein                      | NA         | NA                                                               |
| Supercontig_1.25_MV<br>LG_02948_10sp  | -669,12403 | -669,12402 | 0       | 0       | NS | 0 |  |  |  |  | hypothetical protein                      | NA         | NA                                                               |
| Supercontig_1.5_MVL<br>G_00925_9sp    | -427,54318 | -427,54318 | 0       | 0       | NS | 0 |  |  |  |  | hypothetical protein                      | PF10199.2  | Adaptin_binding(Alpha and gamma adaptin binding protein p34)     |
| Supercontig_1.17_MV<br>LG_02295_9sp   | -378,36859 | -378,36736 | 0,00246 | 0,00123 | NS | 0 |  |  |  |  | hypothetical protein                      | PF01494.12 | FAD_binding_3(FAD binding domain)                                |
| Supercontig_1.5_MVL<br>G_00952_8sp    | -780,83293 | -780,83293 | 0       | 0       | NS | 0 |  |  |  |  | hypothetical protein                      | PF09424.3  | YqeY(Yqey-like protein)                                          |
| Supercontig_1.41_MV<br>LG_03982_9sp   | -594,18731 | -594,18719 | 0,00024 | 0,00012 | NS | 0 |  |  |  |  | hypothetical protein                      | PF00400.25 | WD40(WD domain, G-beta repeat)                                   |
| Supercontig_1.6_MVL<br>G_01097_7sp    | -340,13288 | -338,30811 | 3,64954 | 0,83875 | NS | 0 |  |  |  |  | hypothetical protein                      | PF03311.7  | Cornichon(Cornichon protein)                                     |
| Supercontig_1.11_MV<br>LG_01747_10sp  | -461,95429 | -461,9542  | 0,00018 | 0       | NS | 0 |  |  |  |  | tryptophanyl-tRNA synthetase              | TIGR00233  | TIGR00233(trpS: tryptophan--tRNA ligase)                         |
| Supercontig_1.2_MVL<br>G_00437_7sp    | -464,67549 | -464,67549 | 0       | 0       | NS | 0 |  |  |  |  | hypothetical protein                      | PF01106.10 | NifU(NifU-like domain)                                           |
| Supercontig_1.88_MV<br>LG_05888_8sp   | -333,8771  | -333,87707 | 0       | 0       | NS | 0 |  |  |  |  | hypothetical protein                      | PF00179.19 | UQ_con(Ubiquitin-conjugating enzyme)                             |
| Supercontig_1.7_MVL<br>G_01330_8sp    | -889,10816 | -889,08802 | 0,04028 | 0,01994 | NS | 0 |  |  |  |  | L-aminoadipate-semialdehyde dehydrogenase | PF01073.12 | 3Beta_HSD(3-beta hydroxysteroid dehydrogenase/isomerase family)  |
| Supercontig_1.32_MV<br>LG_03427_8sp   | -460,09276 | -459,06649 | 2,05254 | 0,64166 | NS | 0 |  |  |  |  | hypothetical protein                      | PF08477.6  | Miro(Miro-like protein)                                          |
| Supercontig_1.9_MVL<br>G_01529_8sp    | -1443,1236 | -1443,1236 | 0       | 0       | NS | 0 |  |  |  |  | hypothetical protein                      | NA         | NA                                                               |
| Supercontig_1.117_MV<br>LG_06392_8sp  | -1219,2279 | -1219,2279 | 0       | 0       | NS | 0 |  |  |  |  | hypothetical protein                      | PF00225.16 | Kinesin(Kinesin motor domain)                                    |

|                                       |            |            |         |         |    |   |   |   |   |   |   |   |   |   |   |   |   |   |   |   |                                      |            |                                                                 |
|---------------------------------------|------------|------------|---------|---------|----|---|---|---|---|---|---|---|---|---|---|---|---|---|---|---|--------------------------------------|------------|-----------------------------------------------------------------|
| Supercontig_1.3_MVL<br>G_00600_8sp    | -1140,5945 | -1140,5945 | 0       | 0       | NS | 0 | 0 | 0 | 0 | 0 | 0 | 0 | 0 | 0 | 0 | 0 | 0 | 0 | 0 | 0 | hypothetical protein                 | NA         | NA                                                              |
| Supercontig_1.100_MV<br>LG_06146_7sp  | -1293,9375 | -1291,9098 | 4,05536 | 0,86836 | NS | 0 | 0 | 0 | 0 | 0 | 0 | 0 | 0 | 0 | 0 | 0 | 0 | 0 | 0 | 0 | hypothetical protein                 | NA         | NA                                                              |
| Supercontig_1.35_MV<br>LG_03629_7sp   | -1340,5968 | -1340,2495 | 0,6946  | 0,29341 | NS | 0 | 0 | 0 | 0 | 0 | 0 | 0 | 0 | 0 | 0 | 0 | 0 | 0 | 0 | 0 | hypothetical protein                 | PF08642.3  | Rxt3(Histone deacetylation protein Rxt3)                        |
| Supercontig_1.75_MV<br>LG_05496_10sp  | -780,01772 | -779,81295 | 0,40954 | 0,18517 | NS | 0 | 0 | 0 | 0 | 0 | 0 | 0 | 0 | 0 | 0 | 0 | 0 | 0 | 0 | 0 | hypothetical protein                 | NA         | NA                                                              |
| Supercontig_1.65_MV<br>LG_05126_8sp   | -1116,1121 | -1116,1121 | 0       | 0       | NS | 0 | 0 | 0 | 0 | 0 | 0 | 0 | 0 | 0 | 0 | 0 | 0 | 0 | 0 | 0 | hypothetical protein                 | PF02487.10 | CLN3(CLN3 protein)                                              |
| Supercontig_1.123_MV<br>LG_06479_7sp  | -760,49611 | -760,49611 | 0       | 0       | NS | 0 | 0 | 0 | 0 | 0 | 0 | 0 | 0 | 0 | 0 | 0 | 0 | 0 | 0 | 0 | hypothetical protein                 | PF10558.2  | MTP18(Mitochondrial 18 KDa protein (MTP18))                     |
| Supercontig_1.9_MVL<br>G_01477_8sp    | -418,38331 | -418,38317 | 0,00028 | 0,00014 | NS | 0 | 0 | 0 | 0 | 0 | 0 | 0 | 0 | 0 | 0 | 0 | 0 | 0 | 0 | 0 | hypothetical protein                 | PF10153.2  | DUF2361(Uncharacterised conserved protein (DUF2361))            |
| Supercontig_1.180_MV<br>LG_06996_10sp | -453,81903 | -453,81882 | 0,00042 | 0,00021 | NS | 0 | 0 | 0 | 0 | 0 | 0 | 0 | 0 | 0 | 0 | 0 | 0 | 0 | 0 | 0 | large subunit ribosomal protein L14e | PF00467.22 | KOW(KOW motif)                                                  |
| Supercontig_1.10_MV<br>LG_01678_7sp   | -734,0621  | -734,0621  | 0       | 0       | NS | 0 | 0 | 0 | 0 | 0 | 0 | 0 | 0 | 0 | 0 | 0 | 0 | 0 | 0 | 0 | hypothetical protein                 | PF07690.9  | MFS_1(Major Facilitator Superfamily)                            |
| Supercontig_1.6_MVL<br>G_01063_9sp    | -515,44561 | -515,44101 | 0,0092  | 0,00459 | NS | 0 | 0 | 0 | 0 | 0 | 0 | 0 | 0 | 0 | 0 | 0 | 0 | 0 | 0 | 0 | hypothetical protein                 | NA         | NA                                                              |
| Supercontig_1.2_MVL<br>G_00479_10sp   | -269,66206 | -269,66205 | 0       | 0       | NS | 0 | 0 | 0 | 0 | 0 | 0 | 0 | 0 | 0 | 0 | 0 | 0 | 0 | 0 | 0 | hypothetical protein                 | PF00249.24 | Myb_DNA-binding(Myb-like DNA-binding domain)                    |
| Supercontig_1.14_MV<br>LG_01988_9sp   | -756,18947 | -756,18933 | 0,00028 | 0,00014 | NS | 0 | 0 | 0 | 0 | 0 | 0 | 0 | 0 | 0 | 0 | 0 | 0 | 0 | 0 | 0 | hypothetical protein                 | NA         | NA                                                              |
| Supercontig_1.65_MV<br>LG_05124_10sp  | -844,42299 | -844,42299 | 0       | 0       | NS | 0 | 0 | 0 | 0 | 0 | 0 | 0 | 0 | 0 | 0 | 0 | 0 | 0 | 0 | 0 | hypothetical protein                 | PF01467.19 | CTP_transf_2(Cytidyltransferase)                                |
| Supercontig_1.35_MV<br>LG_03618_9sp   | -457,71454 | -457,50577 | 0,41754 | 0,18842 | NS | 0 | 0 | 0 | 0 | 0 | 0 | 0 | 0 | 0 | 0 | 0 | 0 | 0 | 0 | 0 | hypothetical protein                 | PF00107.19 | ADH_zinc_N(Zinc-binding dehydrogenase)                          |
| Supercontig_1.40_MV<br>LG_03942_8sp   | -717,31326 | -717,31325 | 0       | 0       | NS | 0 | 0 | 0 | 0 | 0 | 0 | 0 | 0 | 0 | 0 | 0 | 0 | 0 | 0 | 0 | hypothetical protein                 | TIGR02777  | TIGR02777(LigD_PE_dom: DNA ligase D, 3'-phosphoesterase domain) |
| Supercontig_1.79_MV<br>LG_05618_10sp  | -415,5285  | -415,5285  | 0       | 0       | NS | 0 | 0 | 0 | 0 | 0 | 0 | 0 | 0 | 0 | 0 | 0 | 0 | 0 | 0 | 0 | hypothetical protein                 | PF01656.16 | CbiA(CobQ/CobB/MinD/ParA nucleotide binding domain)             |
| Supercontig_1.3_MVL<br>G_00602_6sp    | -1517,1145 | -1517,1009 | 0,02728 | 0,01355 | NS | 0 | 0 | 0 | 0 | 0 | 0 | 0 | 0 | 0 | 0 | 0 | 0 | 0 | 0 | 0 | hypothetical protein                 | NA         | NA                                                              |
| Supercontig_1.18_MV<br>LG_02392_7sp   | -310,41971 | -310,41971 | 0       | 0       | NS | 0 | 0 | 0 | 0 | 0 | 0 | 0 | 0 | 0 | 0 | 0 | 0 | 0 | 0 | 0 | hypothetical protein                 | NA         | NA                                                              |
| Supercontig_1.24_MV<br>LG_02870_8sp   | -687,61942 | -687,61907 | 0,0007  | 0,00035 | NS | 0 | 0 | 0 | 0 | 0 | 0 | 0 | 0 | 0 | 0 | 0 | 0 | 0 | 0 | 0 | hypothetical protein                 | PF02798.13 | GST_N(Glutathione S-transferase, N-terminal domain)             |
| Supercontig_1.1_MVL<br>G_00258_7sp    | -673,12206 | -670,82414 | 4,59584 | 0,89953 | NS | 0 | 0 | 0 | 0 | 0 | 0 | 0 | 0 | 0 | 0 | 0 | 0 | 0 | 0 | 0 | hypothetical protein                 | NA         | NA                                                              |
| Supercontig_1.2_MVL<br>G_00325_10sp   | -419,53298 | -419,53283 | 0,0003  | 0,00015 | NS | 0 | 0 | 0 | 0 | 0 | 0 | 0 | 0 | 0 | 0 | 0 | 0 | 0 | 0 | 0 | hypothetical protein                 | PF04115.5  | Ureidogly_hydro(Ureidoglycolate hydrolase)                      |
| Supercontig_1.3_MVL<br>G_00569_8sp    | -1095,5312 | -1095,5312 | 0       | 0       | NS | 0 | 0 | 0 | 0 | 0 | 0 | 0 | 0 | 0 | 0 | 0 | 0 | 0 | 0 | 0 | hypothetical protein                 | PF00621.13 | RhoGEF(RhoGEF domain)                                           |
| Supercontig_1.156_MV<br>LG_06838_6sp  | -866,33434 | -866,33434 | 0       | 0       | NS | 0 | 0 | 0 | 0 | 0 | 0 | 0 | 0 | 0 | 0 | 0 | 0 | 0 | 0 | 0 | hypothetical protein                 | PF00447.10 | HSF_DNA-bind(HSF-type DNA-binding)                              |
| Supercontig_1.7_MVL<br>G_01329_11sp   | -470,38214 | -470,38211 | 0       | 0       | NS | 0 | 0 | 0 | 0 | 0 | 0 | 0 | 0 | 0 | 0 | 0 | 0 | 0 | 0 | 0 | hypothetical protein                 | PF00153.20 | Mito_carr(Mitochondrial carrier protein)                        |



|                                      |            |            |         |                              |    |   |  |  |  |  |                                              |            |                                                                            |
|--------------------------------------|------------|------------|---------|------------------------------|----|---|--|--|--|--|----------------------------------------------|------------|----------------------------------------------------------------------------|
| Supercontig_1.122_MV<br>LG_06468_8sp | -536,34447 | -533,71449 | 5,25996 | 0,92792                      | *  | 0 |  |  |  |  | hypothetical protein                         | PF00657.15 | Lipase_GDSL(GDSL-like<br>Lipase/Acylhydrolase)                             |
| Supercontig_1.52_MV<br>LG_04569_8sp  | -342,10158 | -342,10145 | 0,00026 | 0,00013                      | NS | 0 |  |  |  |  | hypothetical protein                         | PF02627.13 | CMD(Carboxymuconolactone<br>decarboxylase family)                          |
| Supercontig_1.57_MV<br>LG_04829_12sp | -717,42882 | -716,63056 | 1,59652 | 0,54989                      | NS | 0 |  |  |  |  | hypothetical protein                         | PF04157.9  | EAP30(EAP30/Vps36 family)                                                  |
| Supercontig_1.18_MV<br>LG_02395_9sp  | -1155,9579 | -1155,9578 | 0,00026 | 0,00013                      | NS | 0 |  |  |  |  | hypothetical protein                         | PF00018.21 | SH3_1(SH3 domain)                                                          |
| Supercontig_1.21_MV<br>LG_02663_8sp  | -468,4639  | -468,4639  | 0       | 0                            | NS | 0 |  |  |  |  | hypothetical protein                         | PF06201.6  | PITH(C-terminal proteasome-<br>interacting domain of thioredoxin-<br>like) |
| Supercontig_1.52_MV<br>LG_04577_11sp | -498,25936 | -498,25932 | 0       | 0                            | NS | 0 |  |  |  |  | hypothetical protein                         | PF08700.4  | Vps51(Vps51/Vps67)                                                         |
| Supercontig_1.79_MV<br>LG_05623_9sp  | -880,07155 | -880,07155 | 0       | 0                            | NS | 0 |  |  |  |  | hypothetical protein                         | PF02163.15 | Peptidase_M50(Peptidase family<br>M50)                                     |
| Supercontig_1.50_MV<br>LG_04482_12sp | -1032,4365 | -1032,4365 | 0       | 0                            | NS | 0 |  |  |  |  | hypothetical protein                         | NA         | NA                                                                         |
| Supercontig_1.2_MVL<br>G_00443_12sp  | -713,79636 | -713,79636 | 0       | 0                            | NS | 0 |  |  |  |  | hypothetical protein                         | NA         | NA                                                                         |
| Supercontig_1.13_MV<br>LG_01956_9sp  | -511,88182 | -511,90603 | 0       | 0                            | NS | 0 |  |  |  |  | hypothetical protein                         | NA         | NA                                                                         |
| Supercontig_1.34_MV<br>LG_03570_8sp  | -367,06827 | -366,49508 | 1,14638 | 0,43628                      | NS | 0 |  |  |  |  | hypothetical protein                         | NA         | NA                                                                         |
| Supercontig_1.35_MV<br>LG_03622_7sp  | -767,97306 | -767,97305 | 0       | 0                            | NS | 0 |  |  |  |  | tubulin-tyrosine ligase                      | PF03133.8  | TTL(Tubulin-tyrosine ligase<br>family)                                     |
| Supercontig_1.50_MV<br>LG_04467_7sp  | -554,61443 | -554,61443 | 0       | 0                            | NS | 0 |  |  |  |  | hypothetical protein                         | PF03366.9  | YEATS(YEATS family)                                                        |
| Supercontig_1.196_MV<br>LG_07062_9sp | -443,75397 | -443,75393 | 0       | 0                            | NS | 0 |  |  |  |  | 40S ribosomal protein<br>S24                 | PF01282.12 | Ribosomal_S24e(Ribosomal<br>protein S24e)                                  |
| Supercontig_1.116_MV<br>LG_06370_9sp | -489,2565  | -489,2565  | 0       | 0                            | NS | 0 |  |  |  |  | hypothetical protein                         | PF00155.14 | Aminotran_1_2(Aminotransferas<br>e class I and II)                         |
| Supercontig_1.11_MV<br>LG_01701_9sp  | -644,55543 | -644,55543 | 0       | 0                            | NS | 0 |  |  |  |  | hypothetical protein                         | PF04724.6  | Glyco_transf_17(Glycosyltransfe<br>rase family 17)                         |
| Supercontig_1.10_MV<br>LG_01672_9sp  | -550,68967 | -550,65133 | 0,07668 | 0,03761                      | NS | 0 |  |  |  |  | hypothetical protein                         | PF01753.11 | zf-MYND(MYND finger)                                                       |
| Supercontig_1.6_MVL<br>G_01199_9sp   | -1255,8076 | -1255,4818 | 0,6516  | 0,27805                      | NS | 0 |  |  |  |  | hypothetical protein                         | PF04707.7  | PRELI(PRELI-like family)                                                   |
| Supercontig_1.20_MV<br>LG_02582_7sp  | -1369,3871 | -1369,3389 | 0,09652 | 0,04711                      | NS | 0 |  |  |  |  | hypothetical protein                         | PF00611.16 | FCH(Fes/CIP4 homology<br>domain)                                           |
| Supercontig_1.388_MV<br>LG_07257_7sp | -322,15437 | -322,15432 | 0       | 0                            | NS | 0 |  |  |  |  | hypothetical protein                         | NA         | NA                                                                         |
| Supercontig_1.6_MVL<br>G_01131_8sp   | -413,69729 | -413,67348 | 0,04762 | 0,02353                      | NS | 0 |  |  |  |  | cytochrome b-c1<br>complex subunit<br>Rieske | PF02921.7  | UCR_TM(Ubiquinol cytochrome<br>reductase transmembrane<br>region)          |
| Supercontig_1.78_MV<br>LG_05578_8sp  | -892,62696 | -892,6269  | 0,00012 | 5,99982<br>0011188<br>31e-05 | NS | 0 |  |  |  |  | CMGC/CDK protein<br>kinase                   | PF07714.10 | Pkinase_Tyr(Protein tyrosine<br>kinase)                                    |
| Supercontig_1.58_MV<br>LG_04865_8sp  | -627,47552 | -627,47551 | 0       | 0                            | NS | 0 |  |  |  |  | hypothetical protein                         | NA         | NA                                                                         |



|                                       |            |            |         |         |    |   |   |   |   |   |   |   |   |   |                                     |            |                                                                |
|---------------------------------------|------------|------------|---------|---------|----|---|---|---|---|---|---|---|---|---|-------------------------------------|------------|----------------------------------------------------------------|
| Supercontig_1.10_MV<br>LG_01631_7sp   | -510,90319 | -510,90319 | 0       | 0       | NS | 0 | 0 | 0 | 0 | 0 | 0 | 0 | 0 | 0 | hypothetical protein                | PF02270.8  | TFIIF_beta(Transcription initiation factor IIF, beta subunit)  |
| Supercontig_1.92_MV<br>LG_05946_10sp  | -405,92942 | -405,92941 | 0       | 0       | NS | 0 | 0 | 0 | 0 | 0 | 0 | 0 | 0 | 0 | hypothetical protein                | NA         | NA                                                             |
| Supercontig_1.17_MV<br>LG_02319_10sp  | -587,15186 | -587,15186 | 0       | 0       | NS | 0 | 0 | 0 | 0 | 0 | 0 | 0 | 0 | 0 | hypothetical protein                | NA         | NA                                                             |
| Supercontig_1.46_MV<br>LG_04263_7sp   | -1075,5885 | -1075,5885 | 0       | 0       | NS | 0 | 0 | 0 | 0 | 0 | 0 | 0 | 0 | 0 | hypothetical protein                | PF02724.7  | CDC45(CDC45-like protein)                                      |
| Supercontig_1.86_MV<br>LG_05835_9sp   | -422,13171 | -421,2668  | 1,72982 | 0,57891 | NS | 0 | 0 | 0 | 0 | 0 | 0 | 0 | 0 | 0 | hypothetical protein                | NA         | NA                                                             |
| Supercontig_1.82_MV<br>LG_05720_7sp   | -483,70528 | -482,00267 | 3,40522 | 0,81779 | NS | 0 | 0 | 0 | 0 | 0 | 0 | 0 | 0 | 0 | hypothetical protein                | NA         | NA                                                             |
| Supercontig_1.116_MV<br>LG_06372_8sp  | -1911,785  | -1910,8871 | 1,79584 | 0,59258 | NS | 0 | 0 | 0 | 0 | 0 | 0 | 0 | 0 | 0 | hypothetical protein                | NA         | NA                                                             |
| Supercontig_1.1_MVL<br>G_00159_11sp   | -1585,3265 | -1584,9134 | 0,82618 | 0,3384  | NS | 0 | 0 | 0 | 0 | 0 | 0 | 0 | 0 | 0 | hypothetical protein                | NA         | NA                                                             |
| Supercontig_1.213_MV<br>LG_07132_10sp | -725,45444 | -725,45444 | 0       | 0       | NS | 0 | 0 | 0 | 0 | 0 | 0 | 0 | 0 | 0 | hypothetical protein                | NA         | NA                                                             |
| Supercontig_1.7_MVL<br>G_01286_6sp    | -614,177   | -614,177   | 0       | 0       | NS | 0 | 0 | 0 | 0 | 0 | 0 | 0 | 0 | 0 | hypothetical protein                | NA         | NA                                                             |
| Supercontig_1.15_MV<br>LG_02057_8sp   | -1062,329  | -1061,6809 | 1,2962  | 0,47696 | NS | 0 | 0 | 0 | 0 | 0 | 0 | 0 | 0 | 0 | hypothetical protein                | NA         | NA                                                             |
| Supercontig_1.112_MV<br>LG_06334_6sp  | -414,68595 | -414,68594 | 0       | 0       | NS | 0 | 0 | 0 | 0 | 0 | 0 | 0 | 0 | 0 | hypothetical protein                | PF00646.26 | F-box(F-box domain)                                            |
| Supercontig_1.173_MV<br>LG_06961_6sp  | -535,56663 | -535,56655 | 0,00016 | 0       | NS | 0 | 0 | 0 | 0 | 0 | 0 | 0 | 0 | 0 | hypothetical protein                | PF01302.18 | CAP_GLY(CAP-Gly domain)                                        |
| Supercontig_1.9_MVL<br>G_01476_9sp    | -886,25533 | -886,25533 | 0       | 0       | NS | 0 | 0 | 0 | 0 | 0 | 0 | 0 | 0 | 0 | hypothetical protein                | PF01435.11 | Peptidase_M48(Peptidase family M48)                            |
| Supercontig_1.51_MV<br>LG_04498_9sp   | -786,32705 | -786,10716 | 0,43978 | 0,19739 | NS | 0 | 0 | 0 | 0 | 0 | 0 | 0 | 0 | 0 | hypothetical protein                | PF00560.26 | LRR_1(Leucine Rich Repeat)                                     |
| Supercontig_1.79_MV<br>LG_05613_7sp   | -618,34288 | -618,22077 | 0,24422 | 0,11495 | NS | 0 | 0 | 0 | 0 | 0 | 0 | 0 | 0 | 0 | hypothetical protein                | NA         | NA                                                             |
| Supercontig_1.8_MVL<br>G_01452_10sp   | -508,71351 | -508,71351 | 0       | 0       | NS | 0 | 0 | 0 | 0 | 0 | 0 | 0 | 0 | 0 | hypothetical protein                | PF00107.19 | ADH_zinc_N(Zinc-binding dehydrogenase)                         |
| Supercontig_1.1_MVL<br>G_00157_8sp    | -340,75381 | -340,75381 | 0       | 0       | NS | 0 | 0 | 0 | 0 | 0 | 0 | 0 | 0 | 0 | hypothetical protein                | NA         | NA                                                             |
| Supercontig_1.23_MV<br>LG_02764_10sp  | -692,86562 | -692,85542 | 0,0204  | 0,01015 | NS | 0 | 0 | 0 | 0 | 0 | 0 | 0 | 0 | 0 | hypothetical protein                | NA         | NA                                                             |
| Supercontig_1.29_MV<br>LG_03252_10sp  | -714,24399 | -714,24375 | 0,00048 | 0,00024 | NS | 0 | 0 | 0 | 0 | 0 | 0 | 0 | 0 | 0 | glucose-6-phosphate 1-dehydrogenase | PF00479.15 | G6PD_N(Glucose-6-phosphate dehydrogenase, NAD binding domain)  |
| Supercontig_1.19_MV<br>LG_02456_7sp   | -699,39953 | -699,39943 | 0,0002  | 0       | NS | 0 | 0 | 0 | 0 | 0 | 0 | 0 | 0 | 0 | hypothetical protein                | PF00076.15 | RRM_1(RNA recognition motif. (a.k.a. RRM, RBD, or RNP domain)) |
| Supercontig_1.4_MVL<br>G_00691_9sp    | -992,79828 | -992,79828 | 0       | 0       | NS | 0 | 0 | 0 | 0 | 0 | 0 | 0 | 0 | 0 | hypothetical protein                | PF00621.13 | RhoGEF(RhoGEF domain)                                          |
| Supercontig_1.3_MVL<br>G_00505_10sp   | -509,37575 | -508,88101 | 0,98948 | 0,39027 | NS | 0 | 0 | 0 | 0 | 0 | 0 | 0 | 0 | 0 | histidinol-phosphatase (PHP family) | PF02811.12 | PHP(PHP domain)                                                |
| Supercontig_1.212_MV<br>LG_07128_8sp  | -522,42067 | -522,42067 | 0       | 0       | NS | 0 | 0 | 0 | 0 | 0 | 0 | 0 | 0 | 0 | hypothetical protein                | PF06441.5  | EHN(Epoxyde hydrolase N terminus)                              |

|                                      |            |            |         |         |    |   |   |   |   |   |   |   |                              |            |                                                                      |
|--------------------------------------|------------|------------|---------|---------|----|---|---|---|---|---|---|---|------------------------------|------------|----------------------------------------------------------------------|
| Supercontig_1.17_MV<br>LG_02292_8sp  | -559,39221 | -559,39217 | 0       | 0       | NS | 0 | 0 | 0 | 0 | 0 | 0 | 0 | hypothetical protein         | NA         | NA                                                                   |
| Supercontig_1.85_MV<br>LG_05788_9sp  | -465,11503 | -465,11503 | 0       | 0       | NS | 0 | 0 | 0 | 0 | 0 | 0 | 0 | hypothetical protein         | PF08293.4  | MRP-S33(Mitochondrial ribosomal subunit S27)                         |
| Supercontig_1.1_MVL<br>G_00199_10sp  | -339,29761 | -339,29761 | 0       | 0       | NS | 0 | 0 | 0 | 0 | 0 | 0 | 0 | hypothetical protein         | PF00645.11 | zf-PARP(Poly(ADP-ribose) polymerase and DNA-Ligase Zn-finger region) |
| Supercontig_1.25_MV<br>LG_02983_8sp  | -853,31561 | -853,31561 | 0       | 0       | NS | 0 | 0 | 0 | 0 | 0 | 0 | 0 | hypothetical protein         | PF04427.11 | Brix(Brix domain)                                                    |
| Supercontig_1.24_MV<br>LG_02900_7sp  | -738,32274 | -738,24103 | 0,16342 | 0,07846 | NS | 0 | 0 | 0 | 0 | 0 | 0 | 0 | hypothetical protein         | NA         | NA                                                                   |
| Supercontig_1.22_MV<br>LG_02761_7sp  | -1227,7208 | -1227,6664 | 0,1088  | 0,05295 | NS | 0 | 0 | 0 | 0 | 0 | 0 | 0 | hypothetical protein         | PF04146.8  | YTH(YT521-B-like family)                                             |
| Supercontig_1.44_MV<br>LG_04136_9sp  | -630,88574 | -630,88568 | 0,00012 | 0       | NS | 0 | 0 | 0 | 0 | 0 | 0 | 0 | hypothetical protein         | PF03142.8  | Chitin_synth_2(Chitin synthase)                                      |
| Supercontig_1.8_MVL<br>G_01444_8sp   | -385,89747 | -385,89747 | 0       | 0       | NS | 0 | 0 | 0 | 0 | 0 | 0 | 0 | hypothetical protein         | PF11654.1  | DUF2665(Protein of unknown function (DUF2665))                       |
| Supercontig_1.80_MV<br>LG_05640_9sp  | -356,25356 | -356,14568 | 0,21576 | 0,10226 | NS | 0 | 0 | 0 | 0 | 0 | 0 | 0 | hypothetical protein         | PF02466.12 | Tim17(Tim17/Tim22/Tim23 family)                                      |
| Supercontig_1.29_MV<br>LG_03251_11sp | -841,4397  | -841,08664 | 0,70612 | 0,29746 | NS | 0 | 0 | 0 | 0 | 0 | 0 | 0 | hypothetical protein         | NA         | NA                                                                   |
| Supercontig_1.31_MV<br>LG_03365_12sp | -796,99014 | -796,70853 | 0,56322 | 0,24543 | NS | 0 | 0 | 0 | 0 | 0 | 0 | 0 | BUB protein kinase           | PF00069.18 | Pkinase(Protein kinase domain)                                       |
| Supercontig_1.3_MVL<br>G_00630_6sp   | -404,53584 | -404,30697 | 0,45774 | 0,20457 | NS | 0 | 0 | 0 | 0 | 0 | 0 | 0 | ABC1 atypical protein kinase | PF03109.9  | ABC1(ABC1 family)                                                    |
| Supercontig_1.69_MV<br>LG_05311_9sp  | -424,14512 | -424,1451  | 0       | 0       | NS | 0 | 0 | 0 | 0 | 0 | 0 | 0 | hypothetical protein         | PF09813.2  | Coiled-coil_56(Coiled-coil domain-containing protein 56)             |
| Supercontig_1.48_MV<br>LG_04392_8sp  | -481,56955 | -481,25426 | 0,63058 | 0,27042 | NS | 0 | 0 | 0 | 0 | 0 | 0 | 0 | hypothetical protein         | PF00472.13 | RF-1(RF-1 domain)                                                    |
| Supercontig_1.77_MV<br>LG_05543_10sp | -569,75013 | -568,87903 | 1,7422  | 0,58151 | NS | 0 | 0 | 0 | 0 | 0 | 0 | 0 | hypothetical protein         | NA         | NA                                                                   |
| Supercontig_1.67_MV<br>LG_05217_9sp  | -683,73561 | -683,73542 | 0,00038 | 0,00019 | NS | 0 | 0 | 0 | 0 | 0 | 0 | 0 | hypothetical protein         | PF00270.22 | DEAD(DEAD/DEAH box helicase)                                         |
| Supercontig_1.74_MV<br>LG_05474_11sp | -867,33805 | -866,77356 | 1,12898 | 0,43135 | NS | 0 | 0 | 0 | 0 | 0 | 0 | 0 | hypothetical protein         | NA         | NA                                                                   |
| Supercontig_1.55_MV<br>LG_04737_8sp  | -382,80156 | -382,80156 | 0       | 0       | NS | 0 | 0 | 0 | 0 | 0 | 0 | 0 | hypothetical protein         | PF10497.2  | zf-4CXXC_R1(Zinc-finger domain of monoamine-oxidase A repressor R1)  |
| Supercontig_1.95_MV<br>LG_06012_10sp | -634,36377 | -634,36377 | 0       | 0       | NS | 0 | 0 | 0 | 0 | 0 | 0 | 0 | hypothetical protein         | NA         | NA                                                                   |
| Supercontig_1.38_MV<br>LG_03806_8sp  | -517,17191 | -517,17191 | 0       | 0       | NS | 0 | 0 | 0 | 0 | 0 | 0 | 0 | hypothetical protein         | PF00572.11 | Ribosomal_L13(Ribosomal protein L13)                                 |
| Supercontig_1.54_MV<br>LG_04655_7sp  | -1762,9506 | -1762,9506 | 0       | 0       | NS | 0 | 0 | 0 | 0 | 0 | 0 | 0 | hypothetical protein         | NA         | NA                                                                   |
| Supercontig_1.5_MVL<br>G_00918_9sp   | -332,73105 | -332,73085 | 0,0004  | 0,0002  | NS | 0 | 0 | 0 | 0 | 0 | 0 | 0 | hypothetical protein         | PF01148.13 | CTP_transf_1(Cytidyltransferase family)                              |
| Supercontig_1.4_MVL<br>G_00767_9sp   | -470,14047 | -470,14047 | 0       | 0       | NS | 0 | 0 | 0 | 0 | 0 | 0 | 0 | hypothetical protein         | PF00164.18 | Ribosomal_S12(Ribosomal protein S12)                                 |
| Supercontig_1.60_MV<br>LG_04923_7sp  | -1153,0181 | -1152,4324 | 1,17154 | 0,44332 | NS | 0 | 0 | 0 | 0 | 0 | 0 | 0 | hypothetical protein         | PF07217.4  | Het-C(Heterokaryon incompatibility protein Het-C)                    |
| Supercontig_1.60_MV<br>LG_04929_7sp  | -671,29424 | -671,29411 | 0,00026 | 0,00013 | NS | 0 | 0 | 0 | 0 | 0 | 0 | 0 | hypothetical protein         | PF03765.8  | CRAL_TRIO_N(CRAL/TRIO, N-terminus)                                   |

|                                       |            |            |         |         |    |   |  |  |  |                                         |            |                                                                 |
|---------------------------------------|------------|------------|---------|---------|----|---|--|--|--|-----------------------------------------|------------|-----------------------------------------------------------------|
| Supercontig_1.6_MVL<br>G_01064_8sp    | -802,17422 | -802,17365 | 0,00114 | 0,00057 | NS | 0 |  |  |  | minichromosome<br>maintenance protein 6 | PF00493.16 | MCM(MCM2/3/5 family)                                            |
| Supercontig_1.58_MV<br>LG_04873_11sp  | -369,42918 | -369,42899 | 0,00038 | 0,00019 | NS | 0 |  |  |  | 3-hydroxyacyl-CoA<br>dehydrogenase      | PF00725.15 | 3HCDH(3-hydroxyacyl-CoA<br>dehydrogenase, C-terminal<br>domain) |
| Supercontig_1.88_MV<br>LG_05894_7sp   | -476,48878 | -476,20907 | 0,55942 | 0,244   | NS | 0 |  |  |  | hypothetical protein                    | PF08547.5  | CIA30(Complex I intermediate-<br>associated protein 30 (CIA30)) |
| Supercontig_1.4_MVL<br>G_00717_10sp   | -323,51502 | -323,51501 | 0       | 0       | NS | 0 |  |  |  | hypothetical protein                    | NA         | NA                                                              |
| Supercontig_1.142_MV<br>LG_06706_8sp  | -490,17531 | -490,17516 | 0,0003  | 0,00015 | NS | 0 |  |  |  | hypothetical protein                    | PF04099.5  | Sybindin(Sybindin-like family)                                  |
| Supercontig_1.42_MV<br>LG_04042_9sp   | -392,80093 | -392,80093 | 0       | 0       | NS | 0 |  |  |  | hypothetical protein                    | PF00707.15 | IF3_C(Translation initiation factor<br>IF-3, C-terminal domain) |
| Supercontig_1.35_MV<br>LG_03584_10sp  | -429,06314 | -429,02828 | 0,06972 | 0,03426 | NS | 0 |  |  |  | hypothetical protein                    | PF00106.18 | adh_short(short chain<br>dehydrogenase)                         |
| Supercontig_1.70_MV<br>LG_05315_9sp   | -582,25419 | -582,25412 | 0,00014 | 0       | NS | 0 |  |  |  | hypothetical protein                    | PF00067.15 | p450(Cytochrome P450)                                           |
| Supercontig_1.5_MVL<br>G_01046_9sp    | -609,69682 | -609,6966  | 0,00044 | 0,00022 | NS | 0 |  |  |  | hypothetical protein                    | PF03935.8  | SKN1(Beta-glucan synthesis-<br>associated protein (SKN1))       |
| Supercontig_1.125_MV<br>LG_06511_7sp  | -1177,7356 | -1177,7356 | 0       | 0       | NS | 0 |  |  |  | hypothetical protein                    | NA         | NA                                                              |
| Supercontig_1.6_MVL<br>G_01056_12sp   | -715,10801 | -715,10801 | 0       | 0       | NS | 0 |  |  |  | hypothetical protein                    | PF06087.5  | Tyr-DNA_phospho(Tyrosyl-DNA<br>phosphodiesterase)               |
| Supercontig_1.65_MV<br>LG_05137_9sp   | -348,10609 | -348,10608 | 0       | 0       | NS | 0 |  |  |  | hypothetical protein                    | PF08209.4  | Sgf11(Sgf11 (transcriptional<br>regulation protein))            |
| Supercontig_1.67_MV<br>LG_05208_8sp   | -458,91796 | -458,91787 | 0,00018 | 0       | NS | 0 |  |  |  | hypothetical protein                    | PF01237.11 | Oxysterol_BP(Oxysterol-binding<br>protein)                      |
| Supercontig_1.3_MVL<br>G_00612_10sp   | -934,38084 | -934,38084 | 0       | 0       | NS | 0 |  |  |  | hypothetical protein                    | PF08022.5  | FAD_binding_8(FAD-binding<br>domain)                            |
| Supercontig_1.49_MV<br>LG_04446_8sp   | -458,07945 | -457,29967 | 1,55956 | 0,54149 | NS | 0 |  |  |  | hypothetical protein                    | PF00675.13 | Peptidase_M16(Insulinase<br>(Peptidase family M16))             |
| Supercontig_1.141_MV<br>LG_06699_8sp  | -320,75578 | -320,44574 | 0,62008 | 0,26658 | NS | 0 |  |  |  | hypothetical protein                    | PF01883.12 | DUF59(Domain of unknown<br>function DUF59)                      |
| Supercontig_1.96_MV<br>LG_06041_7sp   | -348,20536 | -346,71697 | 2,97678 | 0,77426 | NS | 0 |  |  |  | hypothetical protein                    | PF00825.11 | Ribonuclease_P(Ribonuclease<br>P)                               |
| Supercontig_1.14_MV<br>LG_01989_7sp   | -657,0143  | -657,01429 | 0       | 0       | NS | 0 |  |  |  | hypothetical protein                    | PF04113.7  | Gpi16(Gpi16 subunit, GPI<br>transamidase component)             |
| Supercontig_1.59_MV<br>LG_04908_8sp   | -354,36996 | -354,36986 | 0,0002  | 0       | NS | 0 |  |  |  | hypothetical protein                    | PF02656.8  | DUF202(Domain of unknown<br>function DUF)                       |
| Supercontig_1.46_MV<br>LG_04283_6sp   | -820,91942 | -819,16617 | 3,5065  | 0,82679 | NS | 0 |  |  |  | hypothetical protein                    | NA         | NA                                                              |
| Supercontig_1.2_MVL<br>G_00349_10sp   | -760,5142  | -760,5142  | 0       | 0       | NS | 0 |  |  |  | hypothetical protein                    | PF00439.18 | Bromodomain(Bromodomain)                                        |
| Supercontig_1.79_MV<br>LG_05612_8sp   | -449,8086  | -449,19564 | 1,22592 | 0,45826 | NS | 0 |  |  |  | hypothetical protein                    | PF00929.17 | Exonuc_X-T(Exonuclease)                                         |
| Supercontig_1.135_MV<br>LG_06636_12sp | -529,47896 | -528,88071 | 1,1965  | 0,45023 | NS | 0 |  |  |  | hypothetical protein                    | PF04851.8  | ResIII(Type III restriction<br>enzyme, res subunit)             |
| Supercontig_1.2_MVL<br>G_00305_9sp    | -580,69015 | -580,69013 | 0       | 0       | NS | 0 |  |  |  | hypothetical protein                    | NA         | NA                                                              |

|                                       |            |            |         |         |     |   |  |  |  |  |  |                                                     |            |                                                                            |
|---------------------------------------|------------|------------|---------|---------|-----|---|--|--|--|--|--|-----------------------------------------------------|------------|----------------------------------------------------------------------------|
| Supercontig_1.3_MVL<br>G_00646_10sp   | -858,59879 | -857,68857 | 1,82044 | 0,59756 | NS  | 0 |  |  |  |  |  | hypothetical protein                                | NA         | NA                                                                         |
| Supercontig_1.78_MV<br>LG_05591_7sp   | -629,04794 | -628,31299 | 1,4699  | 0,52047 | NS  | 0 |  |  |  |  |  | hypothetical protein                                | NA         | NA                                                                         |
| Supercontig_1.7_MVL<br>G_01299_8sp    | -326,19441 | -326,1943  | 0,00022 | 0,00011 | NS  | 0 |  |  |  |  |  | DNA-directed RNA<br>polymerase III subunit<br>RPC10 | PF02150.9  | RNA_POL_M_15KD(RNA<br>polymerases M/15 Kd subunit)                         |
| Supercontig_1.73_MV<br>LG_05421_10sp  | -449,90961 | -449,90949 | 0,00024 | 0,00012 | NS  | 0 |  |  |  |  |  | hypothetical protein                                | TIGR01425  | TIGR01425(SRP54_euk: signal<br>recognition particle protein<br>SRP54)      |
| Supercontig_1.112_MV<br>LG_06335_7sp  | -842,57622 | -841,69904 | 1,75436 | 0,58405 | NS  | 0 |  |  |  |  |  | hypothetical protein                                | PF00673.14 | Ribosomal_L5_C(ribosomal L5P<br>family C-terminus)                         |
| Supercontig_1.1_MVL<br>G_00013_9sp    | -844,26652 | -843,65598 | 1,22108 | 0,45694 | NS  | 0 |  |  |  |  |  | hypothetical protein                                | PF01532.13 | Glyco_hydro_47(Glycosyl<br>hydrolase family 47)                            |
| Supercontig_1.44_MV<br>LG_04161_9sp   | -906,8841  | -905,9546  | 1,859   | 0,60525 | NS  | 0 |  |  |  |  |  | hypothetical protein                                | PF08911.4  | NUP50(NUP50 (Nucleoporin 50<br>kDa))                                       |
| Supercontig_1.17_MV<br>LG_02266_11sp  | -356,74471 | -356,74464 | 0,00014 | 0       | NS  | 0 |  |  |  |  |  | hypothetical protein                                | PF00564.17 | PB1(PB1 domain)                                                            |
| Supercontig_1.1_MVL<br>G_00214_11sp   | -1213,2819 | -1213,2819 | 0       | 0       | NS  | 0 |  |  |  |  |  | hypothetical protein                                | PF05178.5  | Kri1 (KRI1-like family)                                                    |
| Supercontig_1.131_MV<br>LG_06575_10sp | -599,35493 | -599,35463 | 0,0006  | 0,0003  | NS  | 0 |  |  |  |  |  | hypothetical protein                                | PF00063.14 | Myosin_head(Myosin head<br>(motor domain))                                 |
| Supercontig_1.80_MV<br>LG_05663_6sp   | -559,96434 | -559,96434 | 0       | 0       | NS  | 0 |  |  |  |  |  | hypothetical protein                                | PF00106.18 | adh_short(short chain<br>dehydrogenase)                                    |
| Supercontig_1.29_MV<br>LG_03243_10sp  | -558,68618 | -558,68618 | 0       | 0       | NS  | 0 |  |  |  |  |  | hypothetical protein                                | PF01565.16 | FAD_binding_4(FAD binding<br>domain)                                       |
| Supercontig_1.54_MV<br>LG_04665_8sp   | -347,71318 | -347,69255 | 0,04126 | 0,02042 | NS  | 0 |  |  |  |  |  | hypothetical protein                                | PF03798.9  | TRAM_LAG1_CLN8(TLC<br>domain)                                              |
| Supercontig_1.84_MV<br>LG_05755_9sp   | -1297,1493 | -1296,9823 | 0,33394 | 0,15378 | NS  | 0 |  |  |  |  |  | hypothetical protein                                | PF08221.4  | HTH_9(RNA polymerase III<br>subunit RPC82 helix-turn-helix<br>domain)      |
| Supercontig_1.22_MV<br>LG_02755_7sp   | -905,43464 | -905,36792 | 0,13344 | 0,06454 | NS  | 0 |  |  |  |  |  | hypothetical protein                                | PF06090.5  | Ins_P5_2-kin(Inositol-<br>pentakisphosphate 2-kinase)                      |
| Supercontig_1.44_MV<br>LG_04169_10sp  | -703,26333 | -703,22611 | 0,07444 | 0,03654 | NS  | 0 |  |  |  |  |  | hypothetical protein                                | PF04424.6  | DUF544(Protein of unknown<br>function (DUF544))                            |
| Supercontig_1.5_MVL<br>G_00902_12sp   | -381,73228 | -376,7106  | 10,0434 | 0,99341 | *** | 0 |  |  |  |  |  | hypothetical protein                                | NA         | NA                                                                         |
| Supercontig_1.55_MV<br>LG_04719_9sp   | -655,75202 | -653,93744 | 3,62916 | 0,83709 | NS  | 0 |  |  |  |  |  | hypothetical protein                                | PF00400.25 | WD40(WD domain, G-beta<br>repeat)                                          |
| Supercontig_1.2_MVL<br>G_00474_11sp   | -309,68361 | -309,68354 | 0,00014 | 0       | NS  | 0 |  |  |  |  |  | hypothetical protein                                | PF00172.11 | Zn_clus(Fungal Zn(2)-Cys(6)<br>binuclear cluster domain)                   |
| Supercontig_1.164_MV<br>LG_06897_8sp  | -754,38698 | -754,38698 | 0       | 0       | NS  | 0 |  |  |  |  |  | hypothetical protein                                | PF09468.3  | RNase_H2-Ydr279(Ydr279p<br>protein family (RNase H2<br>complex component)) |
| Supercontig_1.1_MVL<br>G_00073_7sp    | -866,05486 | -866,05227 | 0,00518 | 0,00259 | NS  | 0 |  |  |  |  |  | hypothetical protein                                | PF06609.6  | TRI12(Fungal trichothecene<br>efflux pump (TRI12))                         |
| Supercontig_1.16_MV<br>LG_02206_7sp   | -1236,2897 | -1234,8594 | 2,86066 | 0,76077 | NS  | 0 |  |  |  |  |  | hypothetical protein                                | NA         | NA                                                                         |
| Supercontig_1.20_MV<br>LG_02566_9sp   | -628,22315 | -626,68335 | 3,0796  | 0,78558 | NS  | 0 |  |  |  |  |  | hypothetical protein                                | NA         | NA                                                                         |
| Supercontig_1.79_MV<br>LG_05607_10sp  | -520,71449 | -520,71449 | 0       | 0       | NS  | 0 |  |  |  |  |  | hypothetical protein                                | PF02137.11 | A_deamin(Adenosine-deaminase<br>(editase) domain)                          |

|                                      |            |            |         |         |    |   |  |  |  |  |                                                   |            |                                                    |
|--------------------------------------|------------|------------|---------|---------|----|---|--|--|--|--|---------------------------------------------------|------------|----------------------------------------------------|
| Supercontig_1.92_MV<br>LG_05963_8sp  | -1106,3531 | -1104,6657 | 3,37492 | 0,81501 | NS | 0 |  |  |  |  | hypothetical protein                              | NA         | NA                                                 |
| Supercontig_1.74_MV<br>LG_05477_12sp | -402,30357 | -402,30341 | 0,00032 | 0,00016 | NS | 0 |  |  |  |  | hypothetical protein                              | NA         | NA                                                 |
| Supercontig_1.233_MV<br>LG_07193_9sp | -522,2672  | -521,83058 | 0,87324 | 0,35378 | NS | 0 |  |  |  |  | hypothetical protein                              | PF00535.19 | Glycos_transf_2(Glycosyl transferase family 2)     |
| Supercontig_1.83_MV<br>LG_05727_7sp  | -1216,2919 | -1215,4413 | 1,70116 | 0,57283 | NS | 0 |  |  |  |  | transcription elongation factor S-II              | PF08711.4  | Med26(TFIIIS helical bundle-like domain)           |
| Supercontig_1.31_MV<br>LG_03376_11sp | -400,37379 | -399,91272 | 0,92214 | 0,36939 | NS | 0 |  |  |  |  | hypothetical protein                              | PF12471.1  | GTP_CH_N(GTP cyclohydrolase N terminal)            |
| Supercontig_1.31_MV<br>LG_03361_9sp  | -1263,1781 | -1262,898  | 0,56014 | 0,24427 | NS | 0 |  |  |  |  | hypothetical protein                              | PF00664.16 | ABC_membrane(ABC transporter transmembrane region) |
| Supercontig_1.36_MV<br>LG_03656_8sp  | -1753,6684 | -1753,6572 | 0,02232 | 0,0111  | NS | 0 |  |  |  |  | hypothetical protein                              | NA         | NA                                                 |
| Supercontig_1.64_MV<br>LG_05102_8sp  | -404,87515 | -404,87515 | 0       | 0       | NS | 0 |  |  |  |  | hypothetical protein                              | PF03966.9  | Trm112p(Trm112p-like protein)                      |
| Supercontig_1.83_MV<br>LG_05744_9sp  | -734,88929 | -734,88926 | 0       | 0       | NS | 0 |  |  |  |  | hypothetical protein                              | PF00169.22 | PH(PH domain)                                      |
| Supercontig_1.3_MVL<br>G_00559_10sp  | -636,12291 | -636,01203 | 0,22176 | 0,10495 | NS | 0 |  |  |  |  | hypothetical protein                              | PF00326.14 | Peptidase_S9(Prolyl oligopeptidase family)         |
| Supercontig_1.53_MV<br>LG_04611_10sp | -355,91746 | -355,91746 | 0       | 0       | NS | 0 |  |  |  |  | hypothetical protein                              | PF00412.15 | LIM(LIM domain)                                    |
| Supercontig_1.6_MVL<br>G_01114_10sp  | -426,9897  | -426,95507 | 0,06926 | 0,03404 | NS | 0 |  |  |  |  | hypothetical protein                              | PF01522.14 | Polysacc_deac_1(Polysaccharid e deacetylase)       |
| Supercontig_1.4_MVL<br>G_00739_9sp   | -468,4375  | -468,4375  | 0       | 0       | NS | 0 |  |  |  |  | hypothetical protein                              | NA         | NA                                                 |
| Supercontig_1.5_MVL<br>G_00903_8sp   | -1372,2349 | -1372,1529 | 0,16402 | 0,07874 | NS | 0 |  |  |  |  | hypothetical protein                              | PF01513.14 | NAD_kinase(ATP-NAD kinase)                         |
| Supercontig_1.1_MVL<br>G_00192_9sp   | -1238,2856 | -1238,2856 | 0       | 0       | NS | 0 |  |  |  |  | hypothetical protein                              | PF00621.13 | RhoGEF(RhoGEF domain)                              |
| Supercontig_1.128_MV<br>LG_06549_7sp | -672,31286 | -672,15829 | 0,30914 | 0,14322 | NS | 0 |  |  |  |  | hypothetical protein                              | NA         | NA                                                 |
| Supercontig_1.20_MV<br>LG_02591_9sp  | -773,69651 | -773,69651 | 0       | 0       | NS | 0 |  |  |  |  | hypothetical protein                              | PF08389.5  | Xpo1(Exportin 1-like protein)                      |
| Supercontig_1.23_MV<br>LG_02768_10sp | -423,33315 | -423,33298 | 0,00034 | 0,00017 | NS | 0 |  |  |  |  | hypothetical protein                              | PF00676.13 | E1_dh(Dehydrogenase E1 component)                  |
| Supercontig_1.1_MVL<br>G_00024_7sp   | -865,48536 | -865,48536 | 0       | 0       | NS | 0 |  |  |  |  | hypothetical protein                              | NA         | NA                                                 |
| Supercontig_1.34_MV<br>LG_03572_10sp | -740,88571 | -740,88571 | 0       | 0       | NS | 0 |  |  |  |  | ATP-binding cassette, subfamily D (ALD), member 2 | PF00005.20 | ABC_tran(ABC transporter)                          |
| Supercontig_1.1_MVL<br>G_00007_6sp   | -718,41466 | -718,41457 | 0,00018 | 0       | NS | 0 |  |  |  |  | hypothetical protein                              | PF00447.10 | HSF_DNA-bind(HSF-type DNA-binding)                 |
| Supercontig_1.5_MVL<br>G_00971_6sp   | -405,58121 | -405,58121 | 0       | 0       | NS | 0 |  |  |  |  | hypothetical protein                              | NA         | NA                                                 |
| Supercontig_1.132_MV<br>LG_06602_8sp | -816,70953 | -814,49247 | 4,43412 | 0,89107 | NS | 0 |  |  |  |  | hypothetical protein                              | PF01068.14 | DNA_ligase_A_M(ATP dependent DNA ligase domain)    |
| Supercontig_1.77_MV<br>LG_05561_9sp  | -1023,3081 | -1023,3081 | 0       | 0       | NS | 0 |  |  |  |  | hypothetical protein                              | PF00400.25 | WD40(WD domain, G-beta repeat)                     |

|                                       |            |            |         |         |    |   |   |   |   |   |                                                     |            |                                                                      |
|---------------------------------------|------------|------------|---------|---------|----|---|---|---|---|---|-----------------------------------------------------|------------|----------------------------------------------------------------------|
| Supercontig_1.11_MV<br>LG_01746_8sp   | -936,81029 | -936,78946 | 0,04166 | 0,02061 | NS | 0 | □ | □ | □ | □ | hypothetical protein                                | PF00270.22 | DEAD(DEAD/DEAH box<br>helicase)                                      |
| Supercontig_1.3_MVL<br>G_00618_9sp    | -331,65866 | -331,65866 | 0       | 0       | NS | 0 | □ | □ | □ | □ | hypothetical protein                                | PF07690.9  | MFS_1(Major Facilitator<br>Superfamily)                              |
| Supercontig_1.70_MV<br>LG_05323_11sp  | -1484,7163 | -1484,7163 | 0       | 0       | NS | 0 | □ | □ | □ | □ | hypothetical protein                                | NA         | NA                                                                   |
| Supercontig_1.11_MV<br>LG_01727_11sp  | -915,61638 | -915,3483  | 0,53616 | 0,23515 | NS | 0 | □ | □ | □ | □ | hypothetical protein                                | PF00400.25 | WD40(WD domain, G-beta<br>repeat)                                    |
| Supercontig_1.132_MV<br>LG_06590_12sp | -653,683   | -653,64556 | 0,07488 | 0,03675 | NS | 0 | □ | □ | □ | □ | hypothetical protein                                | NA         | NA                                                                   |
| Supercontig_1.3_MVL<br>G_00560_11sp   | -724,2224  | -724,2224  | 0       | 0       | NS | 0 | □ | □ | □ | □ | hypothetical protein                                | PF02985.15 | HEAT(HEAT repeat)                                                    |
| Supercontig_1.53_MV<br>LG_04631_11sp  | -784,44638 | -784,43322 | 0,02632 | 0,01307 | NS | 0 | □ | □ | □ | □ | hypothetical protein                                | PF06420.5  | Mgm101p(Mitochondrial genome<br>maintenance MGM101)                  |
| Supercontig_1.28_MV<br>LG_03148_8sp   | -610,32025 | -610,00436 | 0,63178 | 0,27086 | NS | 0 | □ | □ | □ | □ | hypothetical protein                                | PF03999.5  | MAP65_ASE1(Microtubule<br>associated protein<br>(MAP65/ASE1 family)) |
| Supercontig_1.62_MV<br>LG_05024_8sp   | -490,86061 | -490,86057 | 0       | 0       | NS | 0 | □ | □ | □ | □ | hypothetical protein                                | NA         | NA                                                                   |
| Supercontig_1.109_MV<br>LG_06285_10sp | -321,02217 | -321,02217 | 0       | 0       | NS | 0 | □ | □ | □ | □ | hypothetical protein                                | PF01920.13 | Prefoldin_2(Prefoldin subunit)                                       |
| Supercontig_1.54_MV<br>LG_04672_7sp   | -332,75954 | -332,75931 | 0,00046 | 0,00023 | NS | 0 | □ | □ | □ | □ | E3 ubiquitin ligase<br>complex SCF subunit<br>sconC | PF01466.12 | Skp1(Skp1 family, dimerisation<br>domain)                            |
| Supercontig_1.6_MVL<br>G_01121_8sp    | -419,5836  | -419,5836  | 0       | 0       | NS | 0 | □ | □ | □ | □ | hypothetical protein                                | NA         | NA                                                                   |
| Supercontig_1.2_MVL<br>G_00397_7sp    | -836,11644 | -836,11644 | 0       | 0       | NS | 0 | □ | □ | □ | □ | hypothetical protein                                | PF02798.13 | GST_N(Glutathione S-<br>transferase, N-terminal domain)              |
| Supercontig_1.26_MV<br>LG_03057_7sp   | -872,34114 | -872,34114 | 0       | 0       | NS | 0 | □ | □ | □ | □ | hypothetical protein                                | PF00248.14 | Aldo_ket_red(Aldo/keto<br>reductase family)                          |
| Supercontig_1.81_MV<br>LG_05685_8sp   | -968,60607 | -964,04269 | 9,12676 | 0,98957 | ** | 0 | □ | □ | □ | □ | hypothetical protein                                | PF00069.18 | Pkinase(Protein kinase domain)                                       |
| Supercontig_1.58_MV<br>LG_04881_10sp  | -598,22041 | -598,22041 | 0       | 0       | NS | 0 | □ | □ | □ | □ | hypothetical protein                                | PF09368.3  | Sas10_Utp3_C(Sas10 C-<br>terminal domain)                            |
| Supercontig_1.51_MV<br>LG_04527_9sp   | -554,07874 | -554,07872 | 0       | 0       | NS | 0 | □ | □ | □ | □ | hypothetical protein                                | NA         | NA                                                                   |
| Supercontig_1.19_MV<br>LG_02468_7sp   | -379,13545 | -379,13545 | 0       | 0       | NS | 0 | □ | □ | □ | □ | hypothetical protein                                | NA         | NA                                                                   |
| Supercontig_1.175_MV<br>LG_06969_9sp  | -1043,4434 | -1043,4434 | 0       | 0       | NS | 0 | □ | □ | □ | □ | hypothetical protein                                | NA         | NA                                                                   |
| Supercontig_1.6_MVL<br>G_01157_7sp    | -615,73008 | -615,72994 | 0,00028 | 0,00014 | NS | 0 | □ | □ | □ | □ | transporter particle<br>subunit bet3                | PF04051.9  | TRAPP(Transport protein particle<br>(TRAPP) component)               |
| Supercontig_1.73_MV<br>LG_05424_7sp   | -1400,6726 | -1400,6726 | 0       | 0       | NS | 0 | □ | □ | □ | □ | hypothetical protein                                | PF00128.17 | Alpha-amylase(Alpha amylase,<br>catalytic domain)                    |
| Supercontig_1.84_MV<br>LG_05779_9sp   | -819,24802 | -819,24802 | 0       | 0       | NS | 0 | □ | □ | □ | □ | hypothetical protein                                | PF12451.1  | VPS11_C(Vacuolar protein<br>sorting protein 11 C terminal)           |
| Supercontig_1.54_MV<br>LG_04684_6sp   | -594,95053 | -593,62914 | 2,64278 | 0,73324 | NS | 0 | □ | □ | □ | □ | glutathione peroxidase<br>2                         | PF00578.14 | AhpC-TSA(AhpC/TSA family)                                            |
| Supercontig_1.8_MVL<br>G_01448_7sp    | -287,78253 | -287,72469 | 0,11568 | 0,0562  | NS | 0 | □ | □ | □ | □ | histone H2B                                         | PF00125.17 | Histone(Core histone<br>H2A/H2B/H3/H4)                               |

|                                       |            |            |         |         |    |   |  |  |  |                                                 |            |                                                                               |
|---------------------------------------|------------|------------|---------|---------|----|---|--|--|--|-------------------------------------------------|------------|-------------------------------------------------------------------------------|
| Supercontig_1.13_MV<br>LG_01890_8sp   | -865,05095 | -865,05052 | 0,00086 | 0,00043 | NS | 0 |  |  |  | guanine nucleotide-binding protein subunit beta | PF00400.25 | WD40(WD domain, G-beta repeat)                                                |
| Supercontig_1.127_MV<br>LG_06533_10sp | -294,90027 | -293,5811  | 2,63834 | 0,73264 | NS | 0 |  |  |  | hypothetical protein                            | NA         | NA                                                                            |
| Supercontig_1.63_MV<br>LG_05064_9sp   | -983,58284 | -983,58284 | 0       | 0       | NS | 0 |  |  |  | hypothetical protein                            | PF09423.3  | PhoD(PhoD-like phosphatase)                                                   |
| Supercontig_1.207_MV<br>LG_07118_9sp  | -516,86524 | -516,84911 | 0,03226 | 0,016   | NS | 0 |  |  |  | hypothetical protein                            | PF00390.12 | malic(Malic enzyme, N-terminal domain)                                        |
| Supercontig_1.1_MVL<br>G_00131_9sp    | -295,69257 | -295,69257 | 0       | 0       | NS | 0 |  |  |  | ER membrane protein SH3                         | PF08229.4  | SHR3_chaperone(ER membrane protein SH3)                                       |
| Supercontig_1.113_MV<br>LG_06354_7sp  | -524,03216 | -523,2816  | 1,50112 | 0,5279  | NS | 0 |  |  |  | hypothetical protein                            | NA         | NA                                                                            |
| Supercontig_1.2_MVL<br>G_00329_6sp    | -1621,7054 | -1621,6682 | 0,07436 | 0,0365  | NS | 0 |  |  |  | hypothetical protein                            | PF01619.11 | Pro_dh(Proline dehydrogenase)                                                 |
| Supercontig_1.122_MV<br>LG_06456_10sp | -498,70297 | -498,63265 | 0,14064 | 0,0679  | NS | 0 |  |  |  | hypothetical protein                            | PF10304.2  | DUF2411(Domain of unknown function (DUF2411))                                 |
| Supercontig_1.65_MV<br>LG_05152_11sp  | -558,5787  | -557,06038 | 3,03664 | 0,78092 | NS | 0 |  |  |  | hypothetical protein                            | PF07683.7  | CobW_C(Cobalamin synthesis protein cobW C-terminal domain)                    |
| Supercontig_1.83_MV<br>LG_05738_10sp  | -782,1773  | -782,17695 | 0,0007  | 0,00035 | NS | 0 |  |  |  | hypothetical protein                            | PF03151.9  | TPT(Triose-phosphate Transporter family)                                      |
| Supercontig_1.19_MV<br>LG_02480_7sp   | -459,73827 | -459,73818 | 0,00018 | 0       | NS | 0 |  |  |  | ADP-ribosylation factor-like protein 8A         | PF04670.5  | Gtr1_RagA(Gtr1/RagA G protein conserved region)                               |
| Supercontig_1.27_MV<br>LG_03111_10sp  | -520,31049 | -520,3025  | 0,01598 | 0,00796 | NS | 0 |  |  |  | hypothetical protein                            | PF05205.5  | COMPASS-Shg1(COMPASS (Complex proteins associated with Set1p) component shg1) |
| Supercontig_1.31_MV<br>LG_03344_7sp   | -595,86935 | -595,5693  | 0,6001  | 0,25922 | NS | 0 |  |  |  | hypothetical protein                            | PF00300.15 | PGAM(Phosphoglycerate mutase family)                                          |
| Supercontig_1.100_MV<br>LG_06144_10sp | -1610,9265 | -1610,9253 | 0,00236 | 0,00118 | NS | 0 |  |  |  | hypothetical protein                            | NA         | NA                                                                            |
| Supercontig_1.28_MV<br>LG_03136_6sp   | -711,51559 | -711,51555 | 0       | 0       | NS | 0 |  |  |  | hypothetical protein                            | PF00628.22 | PHD(PHD-finger)                                                               |
| Supercontig_1.60_MV<br>LG_04943_9sp   | -1429,9918 | -1428,053  | 3,8775  | 0,85612 | NS | 0 |  |  |  | hypothetical protein                            | PF06424.5  | PRP1_N(PRP1 splicing factor, N-terminal)                                      |
| Supercontig_1.125_MV<br>LG_06512_8sp  | -848,25538 | -847,50265 | 1,50546 | 0,52892 | NS | 0 |  |  |  | hypothetical protein                            | NA         | NA                                                                            |
| Supercontig_1.60_MV<br>LG_04936_7sp   | -500,11508 | -500,11508 | 0       | 0       | NS | 0 |  |  |  | hypothetical protein                            | PF00107.19 | ADH_zinc_N(Zinc-binding dehydrogenase)                                        |
| Supercontig_1.26_MV<br>LG_03027_8sp   | -617,19768 | -617,1976  | 0,00016 | 0       | NS | 0 |  |  |  | hypothetical protein                            | PF07250.4  | Glyoxal_oxid_N(Glyoxal oxidase N-terminus)                                    |
| Supercontig_1.52_MV<br>LG_04590_11sp  | -358,79366 | -358,79366 | 0       | 0       | NS | 0 |  |  |  | hypothetical protein                            | PF00106.18 | adh_short(short chain dehydrogenase)                                          |
| Supercontig_1.48_MV<br>LG_04352_6sp   | -617,53319 | -616,0017  | 3,06298 | 0,78379 | NS | 0 |  |  |  | hypothetical protein                            | PF07519.4  | Tannase(Tannase and feruloyl esterase)                                        |
| Supercontig_1.122_MV<br>LG_06454_8sp  | -558,66265 | -558,50105 | 0,3232  | 0,14922 | NS | 0 |  |  |  | hypothetical protein                            | PF01053.13 | Cys_Met_Meta_PP(Cys/Met metabolism PLP-dependent enzyme)                      |
| Supercontig_1.67_MV<br>LG_05205_11sp  | -480,67759 | -480,65572 | 0,04374 | 0,02163 | NS | 0 |  |  |  | hypothetical protein                            | PF10445.2  | DUF2456(Protein of unknown function (DUF2456))                                |
| Supercontig_1.9_MVL<br>G_01535_9sp    | -634,54982 | -634,37783 | 0,34398 | 0,15801 | NS | 0 |  |  |  | hypothetical protein                            | NA         | NA                                                                            |

|                                       |            |            |         |         |    |   |  |  |  |  |                                               |            |                                                     |
|---------------------------------------|------------|------------|---------|---------|----|---|--|--|--|--|-----------------------------------------------|------------|-----------------------------------------------------|
| Supercontig_1.41_MV<br>LG_03977_8sp   | -929,26124 | -929,26124 | 0       | 0       | NS | 0 |  |  |  |  | hypothetical protein                          | PF04444.7  | Dioxygenase_N(Catechol<br>dioxygenase N terminus)   |
| Supercontig_1.23_MV<br>LG_02805_10sp  | -564,85762 | -564,01389 | 1,68746 | 0,5699  | NS | 0 |  |  |  |  | hypothetical protein                          | PF00667.13 | FAD_binding_1(FAD binding<br>domain)                |
| Supercontig_1.64_MV<br>LG_05103_9sp   | -1257,9293 | -1257,9293 | 0       | 0       | NS | 0 |  |  |  |  | hypothetical protein                          | PF03801.6  | Ndc80_HEC(HEC/Ndc80p<br>family)                     |
| Supercontig_1.34_MV<br>LG_03556_8sp   | -935,55255 | -935,55253 | 0       | 0       | NS | 0 |  |  |  |  | hypothetical protein                          | PF00026.16 | Asp(Eukaryotic aspartyl<br>protease)                |
| Supercontig_1.3_MVL<br>G_00583_10sp   | -714,24315 | -714,24315 | 0       | 0       | NS | 0 |  |  |  |  | glycine dehydrogenase<br>subunit 2            | TIGR00461  | TIGR00461(gcvP: glycine<br>dehydrogenase)           |
| Supercontig_1.3_MVL<br>G_00593_8sp    | -724,36909 | -724,36909 | 0       | 0       | NS | 0 |  |  |  |  | hypothetical protein                          | PF06609.6  | TRI12(Fungal trichothecene<br>efflux pump (TRI12))  |
| Supercontig_1.10_MV<br>LG_01582_7sp   | -798,79763 | -797,964   | 1,66726 | 0,56553 | NS | 0 |  |  |  |  | hypothetical protein                          | PF00010.19 | HLH(Helix-loop-helix DNA-<br>binding domain)        |
| Supercontig_1.54_MV<br>LG_04678_7sp   | -1050,4428 | -1050,4428 | 0       | 0       | NS | 0 |  |  |  |  | hypothetical protein                          | PF10557.2  | Cullin_Nedd8(Cullin protein<br>neddylation domain)  |
| Supercontig_1.149_MV<br>LG_06765_6sp  | -842,2023  | -842,2023  | 0       | 0       | NS | 0 |  |  |  |  | hypothetical protein                          | PF00072.17 | Response_reg(Response<br>regulator receiver domain) |
| Supercontig_1.68_MV<br>LG_05248_7sp   | -447,68428 | -447,68404 | 0,00048 | 0,00024 | NS | 0 |  |  |  |  | protein mago nashi                            | PF02792.7  | Mago_nashi(Mago nashi protein)                      |
| Supercontig_1.12_MV<br>LG_01801_10sp  | -1151,217  | -1151,1991 | 0,03578 | 0,01773 | NS | 0 |  |  |  |  | hypothetical protein                          | PF02421.11 | FerB_N(Ferrous iron transport<br>protein B)         |
| Supercontig_1.2_MVL<br>G_00323_7sp    | -904,92839 | -903,35874 | 3,1393  | 0,79188 | NS | 0 |  |  |  |  | hypothetical protein                          | PF08613.4  | Cyclin(Cyclin)                                      |
| Supercontig_1.25_MV<br>LG_02970_12sp  | -402,99988 | -399,28527 | 7,42922 | 0,97564 | ** | 0 |  |  |  |  | hypothetical protein                          | NA         | NA                                                  |
| Supercontig_1.69_MV<br>LG_05273_6sp   | -587,15023 | -587,01726 | 0,26594 | 0,12451 | NS | 0 |  |  |  |  | hypothetical protein                          | NA         | NA                                                  |
| Supercontig_1.23_MV<br>LG_02789_6sp   | -775,51354 | -774,59963 | 1,82782 | 0,59905 | NS | 0 |  |  |  |  | hypothetical protein                          | NA         | NA                                                  |
| Supercontig_1.15_MV<br>LG_02126_9sp   | -417,98295 | -417,98295 | 0       | 0       | NS | 0 |  |  |  |  | translation initiation<br>factor RLI1         | PF00005.20 | ABC_tran(ABC transporter)                           |
| Supercontig_1.60_MV<br>LG_04926_10sp  | -510,79834 | -510,79823 | 0,00022 | 0,00011 | NS | 0 |  |  |  |  | hypothetical protein                          | PF03142.8  | Chitin_synth_2(Chitin synthase)                     |
| Supercontig_1.98_MV<br>LG_06092_6sp   | -550,80617 | -550,80611 | 0,00012 | 0       | NS | 0 |  |  |  |  | hypothetical protein                          | NA         | NA                                                  |
| Supercontig_1.2_MVL<br>G_00280_8sp    | -1292,4735 | -1292,4735 | 0       | 0       | NS | 0 |  |  |  |  | hypothetical protein                          | PF08238.5  | Sel1(Sel1 repeat)                                   |
| Supercontig_1.13_MV<br>LG_01955_9sp   | -1237,53   | -1237,53   | 0       | 0       | NS | 0 |  |  |  |  | hypothetical protein                          | NA         | NA                                                  |
| Supercontig_1.36_MV<br>LG_03641_6sp   | -746,15805 | -745,98891 | 0,33828 | 0,15561 | NS | 0 |  |  |  |  | hypothetical protein                          | PF00566.11 | TBC(TBC domain)                                     |
| Supercontig_1.51_MV<br>LG_04536_9sp   | -397,87778 | -397,87778 | 0       | 0       | NS | 0 |  |  |  |  | CDK-activating kinase<br>assembly factor MAT1 | PF00097.18 | zf-C3HC4(Zinc finger, C3HC4<br>type (RING finger))  |
| Supercontig_1.139_MV<br>LG_06670_12sp | -522,14624 | -520,44763 | 3,39722 | 0,81706 | NS | 0 |  |  |  |  | hypothetical protein                          | NA         | NA                                                  |
| Supercontig_1.42_MV<br>LG_04043_8sp   | -1449,6274 | -1449,2632 | 0,72836 | 0,30523 | NS | 0 |  |  |  |  | TTK protein kinase                            | PF07714.10 | Pkinase_Tyr(Protein tyrosine<br>kinase)             |
| Supercontig_1.74_MV<br>LG_05439_10sp  | -425,75891 | -423,87852 | 3,76078 | 0,84747 | NS | 0 |  |  |  |  | hypothetical protein                          | PF00106.18 | adh_short(short chain<br>dehydrogenase)             |



|                                       |            |            |         |         |    |   |  |  |  |  |                                               |            |                                                                                  |
|---------------------------------------|------------|------------|---------|---------|----|---|--|--|--|--|-----------------------------------------------|------------|----------------------------------------------------------------------------------|
| Supercontig_1.176_MV<br>LG_06977_11sp | -560,09062 | -558,26888 | 3,64348 | 0,83826 | NS | 0 |  |  |  |  | hypothetical protein                          | PF01421.12 | Repolyisin(Repolyisin (M12B) family zinc metalloprotease)                        |
| Supercontig_1.19_MV<br>LG_02449_10sp  | -1145,7675 | -1145,7675 | 0       | 0       | NS | 0 |  |  |  |  | hypothetical protein                          | PF00632.18 | HECT(HECT-domain (ubiquitin-transferase))                                        |
| Supercontig_1.58_MV<br>LG_04860_11sp  | -489,474   | -489,31501 | 0,31798 | 0,147   | NS | 0 |  |  |  |  | hypothetical protein                          | NA         | NA                                                                               |
| Supercontig_1.5_MVL<br>G_00922_9sp    | -612,83065 | -612,70417 | 0,25296 | 0,11881 | NS | 0 |  |  |  |  | hypothetical protein                          | TIGR00879  | TIGR00879(SP: MFS transporter, sugar porter (SP) family)                         |
| Supercontig_1.91_MV<br>LG_05941_11sp  | -946,48487 | -946,48487 | 0       | 0       | NS | 0 |  |  |  |  | hypothetical protein                          | NA         | NA                                                                               |
| Supercontig_1.8_MVL<br>G_01384_7sp    | -956,59803 | -956,59786 | 0,00034 | 0,00017 | NS | 0 |  |  |  |  | hypothetical protein                          | PF04078.6  | Rcd1(Cell differentiation family, Rcd1-like)                                     |
| Supercontig_1.86_MV<br>LG_05831_8sp   | -369,85433 | -369,04209 | 1,62448 | 0,55614 | NS | 0 |  |  |  |  | hypothetical protein                          | PF04479.6  | RTA1(RTA1 like protein)                                                          |
| Supercontig_1.15_MV<br>LG_02083_7sp   | -1676,3995 | -1673,0118 | 6,77534 | 0,96621 | ** | 0 |  |  |  |  | hypothetical protein                          | PF00082.15 | Peptidase_S8(Subtilase family)                                                   |
| Supercontig_1.8_MVL<br>G_01449_8sp    | -458,98799 | -458,98741 | 0,00116 | 0,00058 | NS | 0 |  |  |  |  | histone H2A                                   | PF00808.16 | CBFD_NFYB_HMF(Histone-like transcription factor (CBF/NF-Y) and archaeal histone) |
| Supercontig_1.7_MVL<br>G_01249_11sp   | -1132,6738 | -1131,8147 | 1,71816 | 0,57645 | NS | 0 |  |  |  |  | hypothetical protein                          | PF07904.6  | CT20(CT20 family)                                                                |
| Supercontig_1.7_MVL<br>G_01260_11sp   | -443,26216 | -443,26211 | 0       | 0       | NS | 0 |  |  |  |  | hypothetical protein                          | NA         | NA                                                                               |
| Supercontig_1.6_MVL<br>G_01091_7sp    | -808,10622 | -808,10622 | 0       | 0       | NS | 0 |  |  |  |  | hypothetical protein                          | PF08645.4  | PNK3P(Polynucleotide kinase 3 phosphatase)                                       |
| Supercontig_1.26_MV<br>LG_03054_8sp   | -633,10416 | -633,10416 | 0       | 0       | NS | 0 |  |  |  |  | hypothetical protein                          | PF08635.3  | ox_reductase_C(Putative oxidoreductase C terminal)                               |
| Supercontig_1.41_MV<br>LG_04031_8sp   | -616,42122 | -615,13576 | 2,57092 | 0,72348 | NS | 0 |  |  |  |  | hypothetical protein                          | PF00400.25 | WD40(WD domain, G-beta repeat)                                                   |
| Supercontig_1.24_MV<br>LG_02853_9sp   | -470,3858  | -469,7517  | 1,2682  | 0,46959 | NS | 0 |  |  |  |  | V-type proton ATPase proteolipid subunit      | TIGR01100  | TIGR01100(V_ATP_synt_C: V-type ATPase, C subunit)                                |
| Supercontig_1.73_MV<br>LG_05408_7sp   | -875,21383 | -875,21383 | 0       | 0       | NS | 0 |  |  |  |  | hypothetical protein                          | PF08647.4  | BRE1(BRE1 E3 ubiquitin ligase)                                                   |
| Supercontig_1.16_MV<br>LG_02193_7sp   | -1655,0777 | -1655,0315 | 0,0925  | 0,0452  | NS | 0 |  |  |  |  | CMGC/DYRK/DYRK2 protein kinase                | PF07714.10 | Pkinase_Tyr(Protein tyrosine kinase)                                             |
| Supercontig_1.132_MV<br>LG_06600_10sp | -519,4652  | -519,4652  | 0       | 0       | NS | 0 |  |  |  |  | hypothetical protein                          | PF00107.19 | ADH_zinc_N(Zinc-binding dehydrogenase)                                           |
| Supercontig_1.3_MVL<br>G_00605_10sp   | -615,63228 | -615,63145 | 0,00166 | 0,00083 | NS | 0 |  |  |  |  | aspartate-semialdehyde dehydrogenase          | PF01118.17 | Semialdehyde_dh(Semialdehyde dehydrogenase, NAD binding domain)                  |
| Supercontig_1.16_MV<br>LG_02171_8sp   | -312,3393  | -312,3392  | 0,0002  | 0       | NS | 0 |  |  |  |  | hypothetical protein                          | NA         | NA                                                                               |
| Supercontig_1.44_MV<br>LG_04160_10sp  | -1381,9195 | -1381,6497 | 0,53964 | 0,23648 | NS | 0 |  |  |  |  | hypothetical protein                          | PF00145.10 | DNA_methylase(C-5 cytosine-specific DNA methylase)                               |
| Supercontig_1.17_MV<br>LG_02289_10sp  | -306,7421  | -306,7421  | 0       | 0       | NS | 0 |  |  |  |  | hypothetical protein                          | PF00512.18 | HisKA(His Kinase A (phosphoacceptor) domain)                                     |
| Supercontig_1.200_MV<br>LG_07081_9sp  | -373,27559 | -373,27546 | 0,00026 | 0,00013 | NS | 0 |  |  |  |  | delta-1-pyrroline-5-carboxylate dehydrogenase | PF00171.15 | Aldedh(Aldehyde dehydrogenase family)                                            |

|                                       |            |            |         |         |    |   |  |  |  |  |  |                           |            |                                                                   |
|---------------------------------------|------------|------------|---------|---------|----|---|--|--|--|--|--|---------------------------|------------|-------------------------------------------------------------------|
| Supercontig_1.92_MV<br>LG_05960_11sp  | -910,36337 | -910,34865 | 0,02944 | 0,01461 | NS | 0 |  |  |  |  |  | hypothetical protein      | NA         | NA                                                                |
| Supercontig_1.127_MV<br>LG_06536_7sp  | -322,41213 | -322,41213 | 0       | 0       | NS | 0 |  |  |  |  |  | hypothetical protein      | NA         | NA                                                                |
| Supercontig_1.104_MV<br>LG_06206_10sp | -1450,9565 | -1450,9565 | 0       | 0       | NS | 0 |  |  |  |  |  | hypothetical protein      | PF00097.18 | zf-C3HC4(Zinc finger, C3HC4 type (RING finger))                   |
| Supercontig_1.135_MV<br>LG_06630_9sp  | -319,36936 | -319,14923 | 0,44026 | 0,19759 | NS | 0 |  |  |  |  |  | monothiol glutaredoxin    | TIGR00365  | TIGR00365(TIGR00365: monothiol glutaredoxin, Grx4 family)         |
| Supercontig_1.8_MVL<br>G_01458_7sp    | -1023,4706 | -1023,4706 | 0       | 0       | NS | 0 |  |  |  |  |  | hypothetical protein      | NA         | NA                                                                |
| Supercontig_1.110_MV<br>LG_06295_7sp  | -575,31731 | -575,31724 | 0,00014 | 0       | NS | 0 |  |  |  |  |  | hypothetical protein      | NA         | NA                                                                |
| Supercontig_1.48_MV<br>LG_04363_8sp   | -1323,2991 | -1321,8018 | 2,99446 | 0,77625 | NS | 0 |  |  |  |  |  | CMGC/CDK protein kinase   | PF07714.10 | Pkinase_Tyr(Protein tyrosine kinase)                              |
| Supercontig_1.31_MV<br>LG_03371_10sp  | -787,52257 | -787,52257 | 0       | 0       | NS | 0 |  |  |  |  |  | hypothetical protein      | NA         | NA                                                                |
| Supercontig_1.9_MVL<br>G_01520_8sp    | -871,20641 | -871,20641 | 0       | 0       | NS | 0 |  |  |  |  |  | hypothetical protein      | PF02225.15 | PA(PA domain)                                                     |
| Supercontig_1.83_MV<br>LG_05740_6sp   | -652,00248 | -652,00006 | 0,00484 | 0,00242 | NS | 0 |  |  |  |  |  | hypothetical protein      | PF04669.6  | DUF579(Protein of unknown function (DUF579))                      |
| Supercontig_1.97_MV<br>LG_06074_6sp   | -1141,8506 | -1141,6682 | 0,3647  | 0,16669 | NS | 0 |  |  |  |  |  | hypothetical protein      | NA         | NA                                                                |
| Supercontig_1.38_MV<br>LG_03799_9sp   | -577,68268 | -576,53751 | 2,29034 | 0,68183 | NS | 0 |  |  |  |  |  | hypothetical protein      | PF04248.5  | DUF427(Domain of unknown function (DUF427))                       |
| Supercontig_1.10_MV<br>LG_01587_7sp   | -430,01026 | -427,88544 | 4,24964 | 0,88055 | NS | 0 |  |  |  |  |  | hypothetical protein      | PF00571.21 | CBS(CBS domain)                                                   |
| Supercontig_1.29_MV<br>LG_03209_7sp   | -396,769   | -396,30189 | 0,93422 | 0,37319 | NS | 0 |  |  |  |  |  | hypothetical protein      | PF01399.20 | PCI(PCI domain)                                                   |
| Supercontig_1.50_MV<br>LG_04491_9sp   | -449,35082 | -449,35082 | 0       | 0       | NS | 0 |  |  |  |  |  | hypothetical protein      | PF00106.18 | adh_short(short chain dehydrogenase)                              |
| Supercontig_1.18_MV<br>LG_02414_10sp  | -659,85958 | -659,81227 | 0,09462 | 0,04621 | NS | 0 |  |  |  |  |  | NAK protein kinase        | PF07714.10 | Pkinase_Tyr(Protein tyrosine kinase)                              |
| Supercontig_1.13_MV<br>LG_01914_9sp   | -308,17528 | -307,9316  | 0,48736 | 0,21626 | NS | 0 |  |  |  |  |  | hypothetical protein      | PF02301.11 | HORMA(HORMA domain)                                               |
| Supercontig_1.51_MV<br>LG_04519_6sp   | -383,94074 | -383,94067 | 0,00014 | 0       | NS | 0 |  |  |  |  |  | hypothetical protein      | PF04110.6  | APG12(Ubiquitin-like autophagy protein Apg12)                     |
| Supercontig_1.6_MVL<br>G_01078_10sp   | -833,42056 | -830,92686 | 4,9874  | 0,9174  | *  | 0 |  |  |  |  |  | hypothetical protein      | NA         | NA                                                                |
| Supercontig_1.35_MV<br>LG_03594_11sp  | -1131,3268 | -1131,3268 | 0       | 0       | NS | 0 |  |  |  |  |  | hypothetical protein      | PF04084.7  | ORC2(Origin recognition complex subunit 2)                        |
| Supercontig_1.11_MV<br>LG_01707_10sp  | -694,90603 | -694,90603 | 0       | 0       | NS | 0 |  |  |  |  |  | hypothetical protein      | PF00270.22 | DEAD(DEAD/DEAH box helicase)                                      |
| Supercontig_1.19_MV<br>LG_02446_8sp   | -485,04529 | -485,04492 | 0,00074 | 0,00037 | NS | 0 |  |  |  |  |  | Isocitrate dehydrogenase  | TIGR00127  | TIGR00127(nadp_idh_euk: isocitrate dehydrogenase, NADP-dependent) |
| Supercontig_1.84_MV<br>LG_05770_6sp   | -560,09527 | -560,09527 | 0       | 0       | NS | 0 |  |  |  |  |  | hypothetical protein      | NA         | NA                                                                |
| Supercontig_1.122_MV<br>LG_06459_10sp | -369,36814 | -369,36769 | 0,0009  | 0,00045 | NS | 0 |  |  |  |  |  | ATP synthase subunit beta | PF00306.20 | ATP-synt_ab_C(ATP synthase alpha/beta chain, C terminal domain)   |

|                                      |            |            |         |         |    |   |   |   |   |                                   |            |                                                                           |
|--------------------------------------|------------|------------|---------|---------|----|---|---|---|---|-----------------------------------|------------|---------------------------------------------------------------------------|
| Supercontig_1.22_MV<br>LG_02724_11sp | -442,26008 | -442,08568 | 0,3488  | 0,16004 | NS | 0 | □ | □ | □ | nucleoside diphosphate kinase     | PF00334.12 | NDK(Nucleoside diphosphate kinase)                                        |
| Supercontig_1.45_MV<br>LG_04202_9sp  | -1029,3372 | -1029,3372 | 0       | 0       | NS | 0 | □ | □ | □ | hypothetical protein              | PF00498.19 | FHA(FHA domain)                                                           |
| Supercontig_1.10_MV<br>LG_01615_9sp  | -319,08477 | -319,0847  | 0,00014 | 0       | NS | 0 | □ | □ | □ | hypothetical protein              | PF06609.6  | TR12(Fungal trichothecene efflux pump (TR12))                             |
| Supercontig_1.17_MV<br>LG_02294_10sp | -567,92484 | -567,83956 | 0,17056 | 0,08174 | NS | 0 | □ | □ | □ | hypothetical protein              | NA         | NA                                                                        |
| Supercontig_1.7_MVL<br>G_01245_8sp   | -878,12706 | -878,12706 | 0       | 0       | NS | 0 | □ | □ | □ | hypothetical protein              | PF03151.9  | TPT(Triose-phosphate Transporter family)                                  |
| Supercontig_1.99_MV<br>LG_06122_11sp | -482,78602 | -481,98746 | 1,59712 | 0,55002 | NS | 0 | □ | □ | □ | hypothetical protein              | NA         | NA                                                                        |
| Supercontig_1.150_MV<br>LG_06775_6sp | -493,59303 | -493,59303 | 0       | 0       | NS | 0 | □ | □ | □ | hypothetical protein              | PF05071.9  | NDUFA12(NADH ubiquinone oxidoreductase subunit NDUFA12)                   |
| Supercontig_1.56_MV<br>LG_04773_10sp | -293,01223 | -293,01201 | 0,00044 | 0,00022 | NS | 0 | □ | □ | □ | serine hydroxymethyltransferase 1 | PF00464.12 | SHMT(Serine hydroxymethyltransferase)                                     |
| Supercontig_1.94_MV<br>LG_05989_9sp  | -378,97057 | -378,97055 | 0       | 0       | NS | 0 | □ | □ | □ | hypothetical protein              | PF07719.10 | TPR_2(Tetratricopeptide repeat)                                           |
| Supercontig_1.4_MVL<br>G_00835_7sp   | -467,5378  | -467,53771 | 0,00018 | 0       | NS | 0 | □ | □ | □ | hypothetical protein              | PF04241.8  | DUF423(Protein of unknown function (DUF423))                              |
| Supercontig_1.127_MV<br>LG_06539_6sp | -353,73153 | -353,73148 | 0,0001  | 0       | NS | 0 | □ | □ | □ | hypothetical protein              | PF01625.14 | PMSR(Peptide methionine sulfoxide reductase)                              |
| Supercontig_1.102_MV<br>LG_06172_9sp | -472,18063 | -470,85286 | 2,65554 | 0,73493 | NS | 0 | □ | □ | □ | hypothetical protein              | PF04900.5  | Fcf1(Fcf1)                                                                |
| Supercontig_1.84_MV<br>LG_05767_11sp | -520,30601 | -520,30601 | 0       | 0       | NS | 0 | □ | □ | □ | hypothetical protein              | PF00107.19 | ADH_zinc_N(Zinc-binding dehydrogenase)                                    |
| Supercontig_1.87_MV<br>LG_05867_10sp | -492,31309 | -492,31266 | 0,00086 | 0,00043 | NS | 0 | □ | □ | □ | hypothetical protein              | PF01595.13 | DUF21(Domain of unknown function DUF21)                                   |
| Supercontig_1.93_MV<br>LG_05969_12sp | -446,50586 | -446,48283 | 0,04606 | 0,02277 | NS | 0 | □ | □ | □ | hypothetical protein              | PF08726.3  | efhand_Ca_insen(Ca2+-insensitive EF hand)                                 |
| Supercontig_1.7_MVL<br>G_01332_11sp  | -604,33533 | -604,33506 | 0,00054 | 0,00027 | NS | 0 | □ | □ | □ | hypothetical protein              | PF01663.15 | Phosphodiesterase (Type I phosphodiesterase / nucleotide pyrophosphatase) |
| Supercontig_1.13_MV<br>LG_01887_10sp | -499,83078 | -499,83057 | 0,00042 | 0,00021 | NS | 0 | □ | □ | □ | hypothetical protein              | NA         | NA                                                                        |
| Supercontig_1.1_MVL<br>G_00102_10sp  | -467,53786 | -467,26832 | 0,53908 | 0,23627 | NS | 0 | □ | □ | □ | hypothetical protein              | TIGR02180  | TIGR02180(GRX_euk: Glutaredoxin)                                          |
| Supercontig_1.21_MV<br>LG_02679_8sp  | -941,99824 | -941,99824 | 0       | 0       | NS | 0 | □ | □ | □ | hypothetical protein              | PF01239.15 | PPTA(Protein prenyltransferase alpha subunit repeat)                      |
| Supercontig_1.3_MVL<br>G_00523_10sp  | -1138,5043 | -1138,0676 | 0,87332 | 0,35381 | NS | 0 | □ | □ | □ | hypothetical protein              | NA         | NA                                                                        |
| Supercontig_1.102_MV<br>LG_06171_7sp | -1377,2007 | -1377,2007 | 0       | 0       | NS | 0 | □ | □ | □ | hypothetical protein              | PF04106.5  | APG5(Autophagy protein Apg5)                                              |
| Supercontig_1.84_MV<br>LG_05762_11sp | -361,15157 | -359,9309  | 2,44134 | 0,70497 | NS | 0 | □ | □ | □ | hypothetical protein              | PF00153.20 | Mito_carr(Mitochondrial carrier protein)                                  |
| Supercontig_1.5_MVL<br>G_00906_8sp   | -501,40232 | -501,29857 | 0,2075  | 0,09855 | NS | 0 | □ | □ | □ | hypothetical protein              | PF06202.7  | GDE_C(Amylo-alpha-1,6-glucosidase)                                        |
| Supercontig_1.2_MVL<br>G_00467_7sp   | -1033,4182 | -1033,4178 | 0,00096 | 0,00048 | NS | 0 | □ | □ | □ | hypothetical protein              | PF04990.5  | RNA_po_Rpb1_7(RNA polymerase Rpb1, domain 7)                              |

|                                       |            |            |         |         |    |   |   |   |   |   |   |   |   |   |                                |            |                                                                 |
|---------------------------------------|------------|------------|---------|---------|----|---|---|---|---|---|---|---|---|---|--------------------------------|------------|-----------------------------------------------------------------|
| Supercontig_1.100_MV<br>LG_06133_7sp  | -1044,4529 | -1043,0265 | 2,85278 | 0,75983 | NS | 0 | ☐ | ☐ | ☐ | ☐ | ☐ | ☐ | ☐ | ☐ | hypothetical protein           | PF00753.20 | Lactamase_B(Metallo-beta-lactamase superfamily)                 |
| Supercontig_1.117_MV<br>LG_06389_10sp | -1280,5857 | -1280,3556 | 0,46018 | 0,20554 | NS | 0 | ☐ | ☐ | ☐ | ☐ | ☐ | ☐ | ☐ | ☐ | hypothetical protein           | PF02696.7  | UPF0061(Uncharacterized ACR, YdiU/JPF0061 family)               |
| Supercontig_1.35_MV<br>LG_03624_7sp   | -1103,5662 | -1103,5662 | 0       | 0       | NS | 0 | ☐ | ☐ | ☐ | ☐ | ☐ | ☐ | ☐ | ☐ | hypothetical protein           | PF01388.14 | ARID(ARID/BRIGHT DNA binding domain)                            |
| Supercontig_1.25_MV<br>LG_02925_8sp   | -651,37328 | -651,36834 | 0,00988 | 0,00493 | NS | 0 | ☐ | ☐ | ☐ | ☐ | ☐ | ☐ | ☐ | ☐ | hypothetical protein           | PF06916.6  | DUF1279(Protein of unknown function (DUF1279))                  |
| Supercontig_1.51_MV<br>LG_04528_8sp   | -1458,9171 | -1458,6217 | 0,59084 | 0,25578 | NS | 0 | ☐ | ☐ | ☐ | ☐ | ☐ | ☐ | ☐ | ☐ | hypothetical protein           | NA         | NA                                                              |
| Supercontig_1.5_MVL<br>G_00965_10sp   | -741,12413 | -740,92851 | 0,39124 | 0,17768 | NS | 0 | ☐ | ☐ | ☐ | ☐ | ☐ | ☐ | ☐ | ☐ | hypothetical protein           | PF03029.10 | ATP_bind_1(Conserved hypothetical ATP binding protein)          |
| Supercontig_1.1_MVL<br>G_00223_10sp   | -1005,419  | -1004,6363 | 1,56522 | 0,54279 | NS | 0 | ☐ | ☐ | ☐ | ☐ | ☐ | ☐ | ☐ | ☐ | hypothetical protein           | PF09734.2  | Tau95(RNA polymerase III transcription factor (TF)IIIC subunit) |
| Supercontig_1.68_MV<br>LG_05264_11sp  | -532,44554 | -532,44544 | 0,0002  | 0       | NS | 0 | ☐ | ☐ | ☐ | ☐ | ☐ | ☐ | ☐ | ☐ | hypothetical protein           | PF01853.11 | MOZ_SAS(MOZ/SAS family)                                         |
| Supercontig_1.20_MV<br>LG_02571_6sp   | -645,15783 | -645,15723 | 0,0012  | 0,0006  | NS | 0 | ☐ | ☐ | ☐ | ☐ | ☐ | ☐ | ☐ | ☐ | hypothetical protein           | PF00254.21 | FKBP_C(FKBP-type peptidyl-prolyl cis-trans isomerase)           |
| Supercontig_1.21_MV<br>LG_02664_10sp  | -450,37155 | -450,3712  | 0,0007  | 0,00035 | NS | 0 | ☐ | ☐ | ☐ | ☐ | ☐ | ☐ | ☐ | ☐ | hypothetical protein           | PF02301.11 | HORMA(HORMA domain)                                             |
| Supercontig_1.207_MV<br>LG_07117_9sp  | -353,35258 | -353,35223 | 0,0007  | 0,00035 | NS | 0 | ☐ | ☐ | ☐ | ☐ | ☐ | ☐ | ☐ | ☐ | replication factor C subunit 5 | PF06144.6  | DNA_pol3_delta(DNA polymerase III, delta subunit)               |
| Supercontig_1.10_MV<br>LG_01673_10sp  | -452,59458 | -452,54453 | 0,1001  | 0,04882 | NS | 0 | ☐ | ☐ | ☐ | ☐ | ☐ | ☐ | ☐ | ☐ | hypothetical protein           | NA         | NA                                                              |
| Supercontig_1.2_MVL<br>G_00322_10sp   | -1034,6399 | -1031,6152 | 6,04948 | 0,95143 | ** | 0 | ☐ | ☐ | ☐ | ☐ | ☐ | ☐ | ☐ | ☐ | hypothetical protein           | PF00447.10 | HSF_DNA-bind(HSF-type DNA-binding)                              |
| Supercontig_1.10_MV<br>LG_01621_6sp   | -1238,4792 | -1238,4237 | 0,11098 | 0,05398 | NS | 0 | ☐ | ☐ | ☐ | ☐ | ☐ | ☐ | ☐ | ☐ | hypothetical protein           | NA         | NA                                                              |
| Supercontig_1.22_MV<br>LG_02719_12sp  | -509,62828 | -509,62828 | 0       | 0       | NS | 0 | ☐ | ☐ | ☐ | ☐ | ☐ | ☐ | ☐ | ☐ | hypothetical protein           | TIGR00879  | TIGR00879(SP: MFS transporter, sugar porter (SP) family)        |
| Supercontig_1.84_MV<br>LG_05763_8sp   | -589,77577 | -589,77546 | 0,00062 | 0,00031 | NS | 0 | ☐ | ☐ | ☐ | ☐ | ☐ | ☐ | ☐ | ☐ | hypothetical protein           | PF00515.21 | TPR_1(Tetratricopeptide repeat)                                 |
| Supercontig_1.8_MVL<br>G_01408_6sp    | -752,15711 | -752,10681 | 0,1006  | 0,04906 | NS | 0 | ☐ | ☐ | ☐ | ☐ | ☐ | ☐ | ☐ | ☐ | hypothetical protein           | NA         | NA                                                              |
| Supercontig_1.3_MVL<br>G_00584_9sp    | -619,45455 | -619,42986 | 0,04938 | 0,02439 | NS | 0 | ☐ | ☐ | ☐ | ☐ | ☐ | ☐ | ☐ | ☐ | hypothetical protein           | NA         | NA                                                              |
| Supercontig_1.58_MV<br>LG_04864_7sp   | -857,99228 | -857,99227 | 0       | 0       | NS | 0 | ☐ | ☐ | ☐ | ☐ | ☐ | ☐ | ☐ | ☐ | hypothetical protein           | NA         | NA                                                              |
| Supercontig_1.19_MV<br>LG_02489_8sp   | -282,92196 | -282,92185 | 0,00022 | 0,00011 | NS | 0 | ☐ | ☐ | ☐ | ☐ | ☐ | ☐ | ☐ | ☐ | hypothetical protein           | NA         | NA                                                              |
| Supercontig_1.101_MV<br>LG_06151_10sp | -1542,911  | -1540,5533 | 4,71544 | 0,90536 | *  | 0 | ☐ | ☐ | ☐ | ☐ | ☐ | ☐ | ☐ | ☐ | hypothetical protein           | NA         | NA                                                              |
| Supercontig_1.26_MV<br>LG_03038_8sp   | -860,8792  | -860,87891 | 0,00058 | 0,00029 | NS | 0 | ☐ | ☐ | ☐ | ☐ | ☐ | ☐ | ☐ | ☐ | asparagine synthetase          | PF00733.14 | Asn_synthase(Asparagine synthase)                               |
| Supercontig_1.42_MV<br>LG_04051_9sp   | -1528,8211 | -1528,8159 | 0,01048 | 0,00523 | NS | 0 | ☐ | ☐ | ☐ | ☐ | ☐ | ☐ | ☐ | ☐ | hypothetical protein           | PF08700.4  | Vps51(Vps51/Vps67)                                              |
| Supercontig_1.28_MV<br>LG_03165_8sp   | -745,67616 | -745,67616 | 0       | 0       | NS | 0 | ☐ | ☐ | ☐ | ☐ | ☐ | ☐ | ☐ | ☐ | hypothetical protein           | PF10356.2  | DUF2034(Protein of unknown function (DUF2034))                  |

|                                       |            |            |         |         |    |   |  |  |  |                       |            |                                                                                  |
|---------------------------------------|------------|------------|---------|---------|----|---|--|--|--|-----------------------|------------|----------------------------------------------------------------------------------|
| Supercontig_1.13_MV<br>LG_01903_9sp   | -491,16125 | -491,16111 | 0,00028 | 0,00014 | NS | 0 |  |  |  | hypothetical protein  | PF00083.17 | Sugar_tr(Sugar (and other) transporter)                                          |
| Supercontig_1.13_MV<br>LG_01893_6sp   | -1021,7602 | -1021,7602 | 0       | 0       | NS | 0 |  |  |  | hypothetical protein  | PF00176.16 | SNF2_N(SNF2 family N-terminal domain)                                            |
| Supercontig_1.24_MV<br>LG_02882_6sp   | -831,54007 | -831,54007 | 0       | 0       | NS | 0 |  |  |  | hypothetical protein  | PF02833.7  | DHHA2(DHHA2 domain)                                                              |
| Supercontig_1.1_MVL<br>G_00185_9sp    | -354,89804 | -354,89785 | 0,00038 | 0,00019 | NS | 0 |  |  |  | hypothetical protein  | NA         | NA                                                                               |
| Supercontig_1.49_MV<br>LG_04417_7sp   | -574,25243 | -570,48117 | 7,54252 | 0,97698 | ** | 0 |  |  |  | hypothetical protein  | PF08287.4  | DASH_Spc19(Spc19)                                                                |
| Supercontig_1.41_MV<br>LG_03997_8sp   | -695,66026 | -695,66017 | 0,00018 | 0       | NS | 0 |  |  |  | hypothetical protein  | PF08622.3  | Svf1(Svf1-like)                                                                  |
| Supercontig_1.6_MVL<br>G_01079_7sp    | -890,35778 | -889,96445 | 0,78666 | 0,32519 | NS | 0 |  |  |  | hypothetical protein  | PF00505.12 | HMG_box(HMG (high mobility group) box)                                           |
| Supercontig_1.24_MV<br>LG_02888_9sp   | -1172,2055 | -1172,2055 | 0       | 0       | NS | 0 |  |  |  | hypothetical protein  | NA         | NA                                                                               |
| Supercontig_1.98_MV<br>LG_06084_8sp   | -709,04566 | -709,04566 | 0       | 0       | NS | 0 |  |  |  | hypothetical protein  | PF10607.2  | RanBPM_CRA(Ran binding protein in the microtubule-organising centre)             |
| Supercontig_1.605_MV<br>LG_07288_9sp  | -521,8362  | -520,4885  | 2,6954  | 0,74016 | NS | 0 |  |  |  | hypothetical protein  | NA         | NA                                                                               |
| Supercontig_1.5_MVL<br>G_00951_10sp   | -676,72228 | -675,85912 | 1,72632 | 0,57817 | NS | 0 |  |  |  | hypothetical protein  | PF01369.13 | Sec7(Sec7 domain)                                                                |
| Supercontig_1.9_MVL<br>G_01525_9sp    | -519,57633 | -519,57633 | 0       | 0       | NS | 0 |  |  |  | hypothetical protein  | PF11894.1  | DUF3414(Protein of unknown function (DUF3414))                                   |
| Supercontig_1.28_MV<br>LG_03180_7sp   | -386,25392 | -386,25392 | 0       | 0       | NS | 0 |  |  |  | hypothetical protein  | PF09784.2  | L31(Mitochondrial ribosomal protein L31)                                         |
| Supercontig_1.25_MV<br>LG_02965_6sp   | -670,93094 | -670,93088 | 0,00012 | 0       | NS | 0 |  |  |  | NEK protein kinase    | PF07714.10 | Pkinase_Tyr(Protein tyrosine kinase)                                             |
| Supercontig_1.70_MV<br>LG_05340_10sp  | -997,14417 | -997,14389 | 0,00056 | 0,00028 | NS | 0 |  |  |  | hypothetical protein  | PF00153.20 | Mito_carr(Mitochondrial carrier protein)                                         |
| Supercontig_1.87_MV<br>LG_05873_10sp  | -290,49629 | -289,71959 | 1,5534  | 0,54008 | NS | 0 |  |  |  | hypothetical protein  | NA         | NA                                                                               |
| Supercontig_1.83_MV<br>LG_05726_8sp   | -309,09236 | -309,09196 | 0,0008  | 0,0004  | NS | 0 |  |  |  | hypothetical protein  | PF00808.16 | CBFD_NFYB_HMF(Histone-like transcription factor (CBF/NF-Y) and archaeal histone) |
| Supercontig_1.2_MVL<br>G_00318_7sp    | -1105,5601 | -1103,6774 | 3,76532 | 0,84782 | NS | 0 |  |  |  | hypothetical protein  | NA         | NA                                                                               |
| Supercontig_1.2_MVL<br>G_00435_7sp    | -703,40657 | -703,40644 | 0,00026 | 0,00013 | NS | 0 |  |  |  | aconitate hydratase 2 | PF00694.12 | Aconitase_C(Aconitase C-terminal domain)                                         |
| Supercontig_1.100_MV<br>LG_06137_9sp  | -481,05001 | -480,6963  | 0,70742 | 0,29792 | NS | 0 |  |  |  | hypothetical protein  | PF06588.4  | Muskelin_N(Muskelin N-terminus)                                                  |
| Supercontig_1.41_MV<br>LG_03972_6sp   | -496,47621 | -496,47621 | 0       | 0       | NS | 0 |  |  |  | hypothetical protein  | PF00561.13 | Abhydrolase_1(alpha/beta hydrolase fold)                                         |
| Supercontig_1.13_MV<br>LG_01917_7sp   | -1503,9535 | -1503,9535 | 0       | 0       | NS | 0 |  |  |  | hypothetical protein  | PF00787.17 | PX(PX domain)                                                                    |
| Supercontig_1.109_MV<br>LG_06273_11sp | -649,76891 | -649,69923 | 0,13936 | 0,06731 | NS | 0 |  |  |  | hypothetical protein  | PF09103.3  | BRCA-2_OB1(BRCA2, oligonucleotide/oligosaccharide-binding, domain 1)             |

|                                       |            |            |         |         |    |   |  |  |  |                                            |            |                                                                                  |
|---------------------------------------|------------|------------|---------|---------|----|---|--|--|--|--------------------------------------------|------------|----------------------------------------------------------------------------------|
| Supercontig_1.15_MV<br>LG_02098_9sp   | -1131,8395 | -1131,8395 | 0       | 0       | NS | 0 |  |  |  | hypothetical protein                       | PF09745.2  | DUF2040(Coiled-coil domain-containing protein 55 (DUF2040))                      |
| Supercontig_1.14_MV<br>LG_02051_12sp  | -721,3475  | -721,18493 | 0,32514 | 0,15004 | NS | 0 |  |  |  | hypothetical protein                       | PF10366.2  | Vps39_1(Vacuolar sorting protein 39 domain 1)                                    |
| Supercontig_1.83_MV<br>LG_05739_9sp   | -360,44835 | -360,35531 | 0,18608 | 0,08884 | NS | 0 |  |  |  | hypothetical protein                       | TIGR00055  | TIGR00055(uppS: di-trans,poly-cis-decaprenylcistransferase)                      |
| Supercontig_1.160_MV<br>LG_06857_10sp | -428,51249 | -426,176   | 4,67298 | 0,90333 | *  | 0 |  |  |  | hypothetical protein                       | PF04442.7  | CtaG_Cox11(Cytochrome c oxidase assembly protein CtaG/Cox11)                     |
| Supercontig_1.165_MV<br>LG_06910_9sp  | -662,88673 | -662,88673 | 0       | 0       | NS | 0 |  |  |  | hypothetical protein                       | PF01177.15 | Asp_Glu_race(Asp/Glu/Hydantoin racemase)                                         |
| Supercontig_1.205_MV<br>LG_07108_11sp | -1175,889  | -1175,889  | 0       | 0       | NS | 0 |  |  |  | hypothetical protein                       | PF00387.12 | PI-PLC-Y(Phosphatidylinositol-specific phospholipase C, Y domain)                |
| Supercontig_1.25_MV<br>LG_02945_11sp  | -1038,6708 | -1038,6708 | 0,00012 | 0       | NS | 0 |  |  |  | phenylalanyl-tRNA synthetase, beta subunit | PF03483.10 | B3_4(B3/4 domain)                                                                |
| Supercontig_1.4_MVL<br>G_00851_8sp    | -731,48798 | -731,48798 | 0       | 0       | NS | 0 |  |  |  | hypothetical protein                       | PF00400.25 | WD40(WD domain, G-beta repeat)                                                   |
| Supercontig_1.10_MV<br>LG_01600_10sp  | -631,82987 | -631,82987 | 0       | 0       | NS | 0 |  |  |  | hypothetical protein                       | PF03878.8  | YIF1(YIF1)                                                                       |
| Supercontig_1.81_MV<br>LG_05681_12sp  | -556,10477 | -556,10477 | 0       | 0       | NS | 0 |  |  |  | hypothetical protein                       | PF01656.16 | CbiA(CobQ/CobB/MinD/ParA nucleotide binding domain)                              |
| Supercontig_1.73_MV<br>LG_05416_9sp   | -611,48531 | -611,48274 | 0,00514 | 0,00257 | NS | 0 |  |  |  | hypothetical protein                       | NA         | NA                                                                               |
| Supercontig_1.3_MVL<br>G_00627_10sp   | -704,97355 | -704,7031  | 0,5409  | 0,23696 | NS | 0 |  |  |  | hypothetical protein                       | PF05686.5  | DUF821(Arabidopsis thaliana protein of unknown function (DUF821))                |
| Supercontig_1.131_MV<br>LG_06586_6sp  | -525,94678 | -525,94678 | 0       | 0       | NS | 0 |  |  |  | Ham1 family protein                        | TIGR00042  | TIGR00042(TIGR00042: non-canonical purine NTP pyrophosphatase, rdgB/HAM1 family) |
| Supercontig_1.29_MV<br>LG_03220_10sp  | -603,25934 | -603,25934 | 0       | 0       | NS | 0 |  |  |  | hypothetical protein                       | PF00595.17 | PDZ(PDZ domain (Also known as DHR or GLGF))                                      |
| Supercontig_1.5_MVL<br>G_01017_9sp    | -792,09979 | -790,91552 | 2,36854 | 0,69403 | NS | 0 |  |  |  | hypothetical protein                       | TIGR00756  | TIGR00756(PPR: pentatricopeptide repeat domain)                                  |
| Supercontig_1.140_MV<br>LG_06674_8sp  | -1244,4539 | -1244,4539 | 0       | 0       | NS | 0 |  |  |  | hypothetical protein                       | PF05019.6  | Coq4(Coenzyme Q (ubiquinone) biosynthesis protein Coq4)                          |
| Supercontig_1.21_MV<br>LG_02629_8sp   | -455,0862  | -453,71365 | 2,7451  | 0,74654 | NS | 0 |  |  |  | hypothetical protein                       | PF08022.5  | FAD_binding_8(FAD-binding domain)                                                |
| Supercontig_1.38_MV<br>LG_03827_8sp   | -391,08137 | -391,08135 | 0       | 0       | NS | 0 |  |  |  | hypothetical protein                       | PF04046.9  | PSP(PSP)                                                                         |
| Supercontig_1.2_MVL<br>G_00276_8sp    | -471,57301 | -471,57301 | 0       | 0       | NS | 0 |  |  |  | hypothetical protein                       | PF00153.20 | Mito_carr(Mitochondrial carrier protein)                                         |
| Supercontig_1.40_MV<br>LG_03928_10sp  | -980,11027 | -979,7506  | 0,71934 | 0,30209 | NS | 0 |  |  |  | hypothetical protein                       | PF00175.14 | NAD_binding_1(Oxidoreductase NAD-binding domain)                                 |
| Supercontig_1.76_MV<br>LG_05507_8sp   | -530,43665 | -530,43651 | 0,00028 | 0,00014 | NS | 0 |  |  |  | hypothetical protein                       | PF00018.21 | SH3_1(SH3 domain)                                                                |

|                                      |            |            |         |         |    |   |   |   |   |   |                                |            |                                                                      |
|--------------------------------------|------------|------------|---------|---------|----|---|---|---|---|---|--------------------------------|------------|----------------------------------------------------------------------|
| Supercontig_1.36_MV<br>LG_03677_7sp  | -906,79507 | -906,79507 | 0       | 0       | NS | 0 | 0 | 0 | 0 | 0 | methionine<br>aminopeptidase 2 | PF00557.17 | Peptidase_M24(Metallopeptidase family M24)                           |
| Supercontig_1.17_MV<br>LG_02307_9sp  | -742,29302 | -742,28093 | 0,02418 | 0,01202 | NS | 0 | 0 | 0 | 0 | 0 | hypothetical protein           | PF00326.14 | Peptidase_S9(Prolyl oligopeptidase family)                           |
| Supercontig_1.27_MV<br>LG_03114_11sp | -899,93263 | -899,77958 | 0,3061  | 0,14191 | NS | 0 | 0 | 0 | 0 | 0 | hypothetical protein           | PF10058.2  | DUF2296(Predicted integral membrane metal-binding protein (DUF2296)) |
| Supercontig_1.92_MV<br>LG_05947_9sp  | -870,89416 | -870,83567 | 0,11698 | 0,05681 | NS | 0 | 0 | 0 | 0 | 0 | hypothetical protein           | PF00063.14 | Myosin_head(Myosin head (motor domain))                              |
| Supercontig_1.10_MV<br>LG_01657_9sp  | -563,49868 | -562,79526 | 1,40684 | 0,50511 | NS | 0 | 0 | 0 | 0 | 0 | hypothetical protein           | PF00076.15 | RRM_1(RNA recognition motif. (a.k.a. RRM, RBD, or RNP domain))       |
| Supercontig_1.7_MVL<br>G_01280_12sp  | -517,96619 | -517,48883 | 0,95472 | 0,37958 | NS | 0 | 0 | 0 | 0 | 0 | hypothetical protein           | NA         | NA                                                                   |
| Supercontig_1.16_MV<br>LG_02197_10sp | -516,04657 | -515,90606 | 0,28102 | 0,13109 | NS | 0 | 0 | 0 | 0 | 0 | hypothetical protein           | PF00023.23 | Ank(Ankyrin repeat)                                                  |
| Supercontig_1.79_MV<br>LG_05615_9sp  | -502,09315 | -502,01411 | 0,15808 | 0,076   | NS | 0 | 0 | 0 | 0 | 0 | hypothetical protein           | PF08202.4  | Mis12_component(Mis12-Mtw1 protein family)                           |
| Supercontig_1.81_MV<br>LG_05668_11sp | -561,61661 | -561,37251 | 0,4882  | 0,21659 | NS | 0 | 0 | 0 | 0 | 0 | hypothetical protein           | NA         | NA                                                                   |
| Supercontig_1.93_MV<br>LG_05976_11sp | -664,57111 | -664,57089 | 0,00044 | 0,00022 | NS | 0 | 0 | 0 | 0 | 0 | hypothetical protein           | NA         | NA                                                                   |
| Supercontig_1.16_MV<br>LG_02242_10sp | -478,21778 | -476,49094 | 3,45368 | 0,82215 | NS | 0 | 0 | 0 | 0 | 0 | histone H2B                    | PF00125.17 | Histone(Core histone H2A/H2B/H3/H4)                                  |
| Supercontig_1.38_MV<br>LG_03793_8sp  | -982,21802 | -982,21802 | 0       | 0       | NS | 0 | 0 | 0 | 0 | 0 | hypothetical protein           | PF05064.6  | Nsp1_C(Nsp1-like C-terminal region)                                  |
| Supercontig_1.150_MV<br>LG_06778_8sp | -366,86351 | -366,77371 | 0,1796  | 0,08589 | NS | 0 | 0 | 0 | 0 | 0 | hypothetical protein           | PF00179.19 | UQ_con(Ubiquitin-conjugating enzyme)                                 |
| Supercontig_1.13_MV<br>LG_01926_10sp | -1747,3395 | -1747,3395 | 0       | 0       | NS | 0 | 0 | 0 | 0 | 0 | hypothetical protein           | PF03142.8  | Chitin_synth_2(Chitin synthase)                                      |
| Supercontig_1.29_MV<br>LG_03236_7sp  | -399,20128 | -399,20128 | 0       | 0       | NS | 0 | 0 | 0 | 0 | 0 | hypothetical protein           | PF08520.3  | DUF1748(Fungal protein of unknown function (DUF1748))                |
| Supercontig_1.87_MV<br>LG_05874_8sp  | -518,42708 | -518,42707 | 0       | 0       | NS | 0 | 0 | 0 | 0 | 0 | hypothetical protein           | PF00566.11 | TBC(TBC domain)                                                      |
| Supercontig_1.41_MV<br>LG_03989_6sp  | -500,57908 | -500,57908 | 0       | 0       | NS | 0 | 0 | 0 | 0 | 0 | hypothetical protein           | NA         | NA                                                                   |
| Supercontig_1.233_MV<br>LG_07195_7sp | -274,36097 | -274,36086 | 0,00022 | 0,00011 | NS | 0 | 0 | 0 | 0 | 0 | hypothetical protein           | PF04525.5  | DUF567(Protein of unknown function (DUF567))                         |
| Supercontig_1.56_MV<br>LG_04752_6sp  | -932,83677 | -931,92882 | 1,8159  | 0,59665 | NS | 0 | 0 | 0 | 0 | 0 | hypothetical protein           | PF01233.12 | NMT(Myristoyl-CoA:protein N-myristoyltransferase, N-terminal domain) |
| Supercontig_1.35_MV<br>LG_03579_9sp  | -620,34461 | -620,34461 | 0       | 0       | NS | 0 | 0 | 0 | 0 | 0 | hypothetical protein           | TIGR01065  | TIGR01065(hlyIII: channel protein, hemolysin III family)             |
| Supercontig_1.5_MVL<br>G_01032_8sp   | -795,07208 | -795,07208 | 0       | 0       | NS | 0 | 0 | 0 | 0 | 0 | hypothetical protein           | PF08477.6  | Miro(Miro-like protein)                                              |
| Supercontig_1.98_MV<br>LG_06086_11sp | -386,97662 | -385,53376 | 2,88572 | 0,76375 | NS | 0 | 0 | 0 | 0 | 0 | argininosuccinate<br>lyase     | TIGR00838  | TIGR00838(argH: argininosuccinate lyase)                             |
| Supercontig_1.14_MV<br>LG_02032_9sp  | -677,78552 | -677,78513 | 0,00078 | 0,00039 | NS | 0 | 0 | 0 | 0 | 0 | hypothetical protein           | PF00270.22 | DEAD(DEAD/DEAH box helicase)                                         |
| Supercontig_1.22_MV<br>LG_02756_12sp | -453,81264 | -453,03955 | 1,54618 | 0,53842 | NS | 0 | 0 | 0 | 0 | 0 | hypothetical protein           | NA         | NA                                                                   |

|                                       |            |            |         |         |    |   |   |   |   |   |                                         |            |                                                                                       |
|---------------------------------------|------------|------------|---------|---------|----|---|---|---|---|---|-----------------------------------------|------------|---------------------------------------------------------------------------------------|
| Supercontig_1.6_MVL<br>G_01143_9sp    | -424,48078 | -424,48028 | 0,001   | 0,0005  | NS | 0 | □ | □ | □ | □ | CMGC/CDK/CDK5<br>protein kinase         | PF07714.10 | Pkinase_Tyr(Protein tyrosine<br>kinase)                                               |
| Supercontig_1.51_MV<br>LG_04545_12sp  | -532,48632 | -532,48629 | 0       | 0       | NS | 0 | □ | □ | □ | □ | hypothetical protein                    | TIGR00727  | TIGR00727(ISP4_OPT: small<br>oligopeptide transporter, OPT<br>family)                 |
| Supercontig_1.17_MV<br>LG_02331_8sp   | -380,68897 | -380,68887 | 0       | 0       | NS | 0 | □ | □ | □ | □ | hypothetical protein                    | PF00082.15 | Peptidase_S8(Subtilase family)                                                        |
| Supercontig_1.55_MV<br>LG_04720_6sp   | -1105,9324 | -1105,9324 | 0       | 0       | NS | 0 | □ | □ | □ | □ | hypothetical protein                    | PF07065.7  | D123(D123)                                                                            |
| Supercontig_1.9_MVL<br>G_01497_7sp    | -624,87063 | -624,51657 | 0,70812 | 0,29817 | NS | 0 | □ | □ | □ | □ | hypothetical protein                    | PF00153.20 | Mito_carr(Mitochondrial carrier<br>protein)                                           |
| Supercontig_1.81_MV<br>LG_05665_8sp   | -724,44835 | -723,16492 | 2,56686 | 0,72291 | NS | 0 | □ | □ | □ | □ | hypothetical protein                    | PF04818.6  | DUF618(Protein of unknown<br>function, DUF618)                                        |
| Supercontig_1.2_MVL<br>G_00346_8sp    | -694,08886 | -694,08883 | 0       | 0       | NS | 0 | □ | □ | □ | □ | hypothetical protein                    | PF00498.19 | FHA(FHA domain)                                                                       |
| Supercontig_1.16_MV<br>LG_02184_8sp   | -698,73066 | -698,16181 | 1,1377  | 0,43382 | NS | 0 | □ | □ | □ | □ | hypothetical protein                    | PF07732.8  | Cu-oxidase_3(Multicopper<br>oxidase)                                                  |
| Supercontig_1.7_MVL<br>G_01298_10sp   | -626,06218 | -626,06219 | 0       | 0       | NS | 0 | □ | □ | □ | □ | hypothetical protein                    | NA         | NA                                                                                    |
| Supercontig_1.7_MVL<br>G_01291_9sp    | -365,64786 | -365,63275 | 0,03022 | 0,015   | NS | 0 | □ | □ | □ | □ | hypothetical protein                    | PF08512.5  | Rtt106(Histone chaperone<br>Rtt106-like)                                              |
| Supercontig_1.57_MV<br>LG_04831_11sp  | -433,57948 | -433,11353 | 0,9319  | 0,37246 | NS | 0 | □ | □ | □ | □ | hypothetical protein                    | PF05680.5  | ATP_synt_E(ATP synthase E<br>chain)                                                   |
| Supercontig_1.74_MV<br>LG_05472_11sp  | -440,73753 | -440,73753 | 0       | 0       | NS | 0 | □ | □ | □ | □ | D-3-phosphoglycerate<br>dehydrogenase 2 | PF02826.12 | 2-Hacid_dh_C(D-isomer specific<br>2-hydroxyacid dehydrogenase,<br>NAD binding domain) |
| Supercontig_1.117_MV<br>LG_06403_10sp | -505,5945  | -505,59441 | 0,00018 | 0       | NS | 0 | □ | □ | □ | □ | ribose-phosphate 3-<br>epimerase        | PF00834.12 | Ribul_P_3_epim(Ribulose-<br>phosphate 3 epimerase family)                             |
| Supercontig_1.112_MV<br>LG_06323_9sp  | -304,9551  | -304,46093 | 0,98834 | 0,38992 | NS | 0 | □ | □ | □ | □ | Plasma membrane<br>(H+) ATPase          | TIGR01494  | TIGR01494(ATPase_P-type:<br>HAD ATPase, P-type, family IC)                            |
| Supercontig_1.25_MV<br>LG_02940_6sp   | -691,09562 | -691,09562 | 0       | 0       | NS | 0 | □ | □ | □ | □ | hypothetical protein                    | PF00106.18 | adh_short(short chain<br>dehydrogenase)                                               |
| Supercontig_1.87_MV<br>LG_05864_11sp  | -517,29455 | -517,29455 | 0       | 0       | NS | 0 | □ | □ | □ | □ | hypothetical protein                    | PF00667.13 | FAD_binding_1(FAD binding<br>domain)                                                  |
| Supercontig_1.63_MV<br>LG_05075_9sp   | -437,14778 | -437,14771 | 0,00014 | 0       | NS | 0 | □ | □ | □ | □ | cytidine deaminase                      | TIGR01354  | TIGR01354(cyt_deam_tetra:<br>cytidine deaminase)                                      |
| Supercontig_1.52_MV<br>LG_04557_8sp   | -377,39663 | -377,39663 | 0       | 0       | NS | 0 | □ | □ | □ | □ | hypothetical protein                    | PF00505.12 | HMG_box(HMG (high mobility<br>group) box)                                             |
| Supercontig_1.65_MV<br>LG_05133_11sp  | -317,92856 | -317,92829 | 0,00054 | 0,00027 | NS | 0 | □ | □ | □ | □ | hypothetical protein                    | PF01145.18 | Band_7(SPFH domain / Band 7<br>family)                                                |
| Supercontig_1.38_MV<br>LG_03824_8sp   | -1046,1722 | -1046,1721 | 0,00026 | 0,00013 | NS | 0 | □ | □ | □ | □ | hypothetical protein                    | PF00443.22 | UCH(Ubiquitin carboxyl-terminal<br>hydrolase)                                         |
| Supercontig_1.9_MVL<br>G_01524_8sp    | -431,86666 | -431,86666 | 0       | 0       | NS | 0 | □ | □ | □ | □ | hypothetical protein                    | PF03879.7  | Cgr1(Cgr1 family)                                                                     |
| Supercontig_1.62_MV<br>LG_05009_11sp  | -430,15875 | -430,15862 | 0,00026 | 0,00013 | NS | 0 | □ | □ | □ | □ | hypothetical protein                    | PF00179.19 | UQ_con(Ubiquitin-conjugating<br>enzyme)                                               |
| Supercontig_1.16_MV<br>LG_02201_7sp   | -1071,6074 | -1070,1145 | 2,98584 | 0,77528 | NS | 0 | □ | □ | □ | □ | hypothetical protein                    | PF01507.12 | PAPS_reduct(Phosphoadenosin<br>e phosphosulfate reductase<br>family)                  |







|                                       |            |            |         |         |    |   |  |  |  |  |                                   |            |                                                                               |
|---------------------------------------|------------|------------|---------|---------|----|---|--|--|--|--|-----------------------------------|------------|-------------------------------------------------------------------------------|
| Supercontig_1.155_MV<br>LG_06825_6sp  | -1291,9194 | -1291,9195 | 0       | 0       | NS | 0 |  |  |  |  | ABC1-B atypical<br>protein kinase | PF03109.9  | ABC1(ABC1 family)                                                             |
| Supercontig_1.13_MV<br>LG_01889_9sp   | -466,73281 | -466,53244 | 0,40074 | 0,18157 | NS | 0 |  |  |  |  | hypothetical protein              | PF03256.9  | APC10(Anaphase-promoting<br>complex, subunit 10 (APC10))                      |
| Supercontig_1.165_MV<br>LG_06906_9sp  | -500,53204 | -499,68444 | 1,6952  | 0,57156 | NS | 0 |  |  |  |  | hypothetical protein              | PF04588.6  | HIG_1_N(Hypoxia induced<br>protein conserved region)                          |
| Supercontig_1.12_MV<br>LG_01802_9sp   | -822,66322 | -822,66322 | 0       | 0       | NS | 0 |  |  |  |  | hypothetical protein              | PF06862.5  | DUF1253(Protein of unknown<br>function (DUF1253))                             |
| Supercontig_1.101_MV<br>LG_06168_10sp | -1288,2774 | -1286,9058 | 2,74326 | 0,74631 | NS | 0 |  |  |  |  | hypothetical protein              | PF03556.8  | DUF298(Domain of unknown<br>function (DUF298))                                |
| Supercontig_1.52_MV<br>LG_04554_9sp   | -399,19019 | -399,18974 | 0,0009  | 0,00045 | NS | 0 |  |  |  |  | septin like spn4                  | PF03193.9  | DUF258(Protein of unknown<br>function, DUF258)                                |
| Supercontig_1.99_MV<br>LG_06116_9sp   | -295,14516 | -295,14507 | 0,00018 | 0       | NS | 0 |  |  |  |  | hypothetical protein              | NA         | NA                                                                            |
| Supercontig_1.2_MVL<br>G_00461_8sp    | -711,32033 | -711,31996 | 0,00074 | 0,00037 | NS | 0 |  |  |  |  | hypothetical protein              | PF03900.8  | Porphobil_deamC(Porphobilinog<br>en deaminase, C-terminal<br>domain)          |
| Supercontig_1.65_MV<br>LG_05140_7sp   | -474,07924 | -474,07894 | 0,0006  | 0,0003  | NS | 0 |  |  |  |  | metacaspase-1                     | PF00656.15 | Peptidase_C14(Caspase<br>domain)                                              |
| Supercontig_1.70_MV<br>LG_05330_9sp   | -597,91928 | -597,91918 | 0,0002  | 0       | NS | 0 |  |  |  |  | hypothetical protein              | PF03005.8  | DUF231(Arabidopsis proteins of<br>unknown function)                           |
| Supercontig_1.28_MV<br>LG_03166_6sp   | -936,98056 | -936,98056 | 0       | 0       | NS | 0 |  |  |  |  | hypothetical protein              | PF00856.21 | SET(SET domain)                                                               |
| Supercontig_1.49_MV<br>LG_04430_8sp   | -732,39006 | -730,88832 | 3,00348 | 0,77726 | NS | 0 |  |  |  |  | hypothetical protein              | PF04851.8  | ResIII(Type III restriction<br>enzyme, res subunit)                           |
| Supercontig_1.10_MV<br>LG_01658_8sp   | -603,2885  | -603,10789 | 0,36122 | 0,16524 | NS | 0 |  |  |  |  | hypothetical protein              | PF10357.2  | Kin17_mid(Domain of Kin17<br>curved DNA-binding protein)                      |
| Supercontig_1.93_MV<br>LG_05979_10sp  | -425,18373 | -425,18339 | 0,00068 | 0,00034 | NS | 0 |  |  |  |  | hypothetical protein              | PF00300.15 | PGAM(Phosphoglycerate<br>mutase family)                                       |
| Supercontig_1.47_MV<br>LG_04346_7sp   | -871,55274 | -871,55248 | 0,00052 | 0,00026 | NS | 0 |  |  |  |  | hypothetical protein              | PF00501.21 | AMP-binding(AMP-binding<br>enzyme)                                            |
| Supercontig_1.68_MV<br>LG_05268_11sp  | -386,99216 | -386,99216 | 0       | 0       | NS | 0 |  |  |  |  | AP-2 complex subunit<br>mu        | PF01217.13 | Clat_adaptor_s(Clathrin adaptor<br>complex small chain)                       |
| Supercontig_1.94_MV<br>LG_05986_6sp   | -517,52808 | -517,52808 | 0       | 0       | NS | 0 |  |  |  |  | hypothetical protein              | PF01263.13 | Aldose_epim(Aldose 1-<br>epimerase)                                           |
| Supercontig_1.61_MV<br>LG_04967_9sp   | -884,45795 | -883,39619 | 2,12352 | 0,65415 | NS | 0 |  |  |  |  | hypothetical protein              | PF05063.7  | MT-A70(MT-A70)                                                                |
| Supercontig_1.1_MVL<br>G_00005_7sp    | -1373,162  | -1373,162  | 0       | 0       | NS | 0 |  |  |  |  | hypothetical protein              | PF00160.14 | Pro_isomerase(Cyclophilin type<br>peptidyl-prolyl cis-trans<br>isomerase/CLD) |
| Supercontig_1.6_MVL<br>G_01134_6sp    | -550,17344 | -550,16986 | 0,00716 | 0,00357 | NS | 0 |  |  |  |  | hypothetical protein              | PF00583.17 | Acetyltransf_1(Acetyltransferase<br>(GNAT) family)                            |
| Supercontig_1.33_MV<br>LG_03449_10sp  | -593,42872 | -592,5077  | 1,84204 | 0,60189 | NS | 0 |  |  |  |  | hypothetical protein              | PF00172.11 | Zn_clus(Fungal Zn(2)-Cys(6)<br>binuclear cluster domain)                      |
| Supercontig_1.31_MV<br>LG_03369_10sp  | -531,85942 | -530,98745 | 1,74394 | 0,58187 | NS | 0 |  |  |  |  | hypothetical protein              | PF06682.5  | DUF1183(Protein of unknown<br>function (DUF1183))                             |
| Supercontig_1.98_MV<br>LG_06099_7sp   | -681,38081 | -681,37353 | 0,01456 | 0,00725 | NS | 0 |  |  |  |  | hypothetical protein              | PF07574.6  | SMC_Nse1(Nse1 non-SMC<br>component of SMC5-6 complex)                         |
| Supercontig_1.38_MV<br>LG_03768_8sp   | -562,80183 | -562,15521 | 1,29324 | 0,47619 | NS | 0 |  |  |  |  | 40S ribosomal protein<br>S11      | TIGR03630  | TIGR03630(arch_S17P:<br>archaeal ribosomal protein<br>S17P)                   |

|                                       |            |            |         |         |    |   |   |   |   |   |   |                                            |            |                                                                               |
|---------------------------------------|------------|------------|---------|---------|----|---|---|---|---|---|---|--------------------------------------------|------------|-------------------------------------------------------------------------------|
| Supercontig_1.53_MV<br>LG_04616_10sp  | -268,4509  | -268,45047 | 0,00086 | 0,00043 | NS | 0 | ☐ | ☐ | ☐ | ☐ | ☐ | hypothetical protein                       | PF00450.15 | Peptidase_S10(Serine<br>carboxypeptidase)                                     |
| Supercontig_1.23_MV<br>LG_02776_7sp   | -724,18884 | -724,18884 | 0       | 0       | NS | 0 | ☐ | ☐ | ☐ | ☐ | ☐ | hypothetical protein                       | PF06999.5  | Suc_Fer-like(Sucrase/ferredoxin-<br>like)                                     |
| Supercontig_1.42_MV<br>LG_04076_9sp   | -432,40292 | -430,80407 | 3,1977  | 0,79787 | NS | 0 | ☐ | ☐ | ☐ | ☐ | ☐ | hypothetical protein                       | PF01535.13 | PPR(PPR repeat)                                                               |
| Supercontig_1.93_MV<br>LG_05985_6sp   | -1457,1181 | -1456,8113 | 0,61362 | 0,26421 | NS | 0 | ☐ | ☐ | ☐ | ☐ | ☐ | hypothetical protein                       | PF01323.13 | DSBA(DSBA-like thioredoxin<br>domain)                                         |
| Supercontig_1.32_MV<br>LG_03412_10sp  | -574,60778 | -574,60775 | 0       | 0       | NS | 0 | ☐ | ☐ | ☐ | ☐ | ☐ | hypothetical protein                       | PF00097.18 | zf-C3HC4(Zinc finger, C3HC4<br>type (RING finger))                            |
| Supercontig_1.8_MVL<br>G_01362_7sp    | -598,7077  | -598,7077  | 0       | 0       | NS | 0 | ☐ | ☐ | ☐ | ☐ | ☐ | hypothetical protein                       | PF02146.10 | SIR2(Sir2 family)                                                             |
| Supercontig_1.11_MV<br>LG_01759_8sp   | -916,35888 | -916,17426 | 0,36924 | 0,16858 | NS | 0 | ☐ | ☐ | ☐ | ☐ | ☐ | hypothetical protein                       | NA         | NA                                                                            |
| Supercontig_1.3_MVL<br>G_00577_8sp    | -368,66634 | -368,66627 | 0,00014 | 0       | NS | 0 | ☐ | ☐ | ☐ | ☐ | ☐ | hypothetical protein                       | PF04252.6  | RNA_Me_trans(Predicted SAM-<br>dependent RNA<br>methyltransferase)            |
| Supercontig_1.8_MVL<br>G_01372_9sp    | -353,43258 | -353,43253 | 0       | 0       | NS | 0 | ☐ | ☐ | ☐ | ☐ | ☐ | hypothetical protein                       | PF08033.5  | Sec23_BS(Sec23/Sec24 beta-<br>sandwich domain)                                |
| Supercontig_1.60_MV<br>LG_04924_10sp  | -675,38917 | -675,3864  | 0,00554 | 0,00277 | NS | 0 | ☐ | ☐ | ☐ | ☐ | ☐ | homoserine<br>dehydrogenase                | PF00742.12 | Homoserine_dh(Homoserine<br>dehydrogenase)                                    |
| Supercontig_1.38_MV<br>LG_03814_9sp   | -637,42107 | -637,42107 | 0       | 0       | NS | 0 | ☐ | ☐ | ☐ | ☐ | ☐ | hypothetical protein                       | PF01753.11 | zf-MYND(MYND finger)                                                          |
| Supercontig_1.2_MVL<br>G_00415_9sp    | -435,82626 | -435,82625 | 0       | 0       | NS | 0 | ☐ | ☐ | ☐ | ☐ | ☐ | hypothetical protein                       | NA         | NA                                                                            |
| Supercontig_1.33_MV<br>LG_03471_9sp   | -531,45309 | -530,14653 | 2,61312 | 0,72925 | NS | 0 | ☐ | ☐ | ☐ | ☐ | ☐ | hypothetical protein                       | NA         | NA                                                                            |
| Supercontig_1.40_MV<br>LG_03908_10sp  | -711,45286 | -711,35242 | 0,20088 | 0,09556 | NS | 0 | ☐ | ☐ | ☐ | ☐ | ☐ | hypothetical protein                       | PF05970.7  | DUF889(PIF1 helicase)                                                         |
| Supercontig_1.46_MV<br>LG_04279_9sp   | -681,14578 | -681,14576 | 0       | 0       | NS | 0 | ☐ | ☐ | ☐ | ☐ | ☐ | hypothetical protein                       | PF10336.2  | DUF2420(Protein of unknown<br>function (DUF2420))                             |
| Supercontig_1.156_MV<br>LG_06832_12sp | -507,80312 | -507,7778  | 0,05064 | 0,025   | NS | 0 | ☐ | ☐ | ☐ | ☐ | ☐ | hypothetical protein                       | PF00627.24 | UBA(UBA/TS-N domain)                                                          |
| Supercontig_1.5_MVL<br>G_00936_8sp    | -995,65519 | -995,65519 | 0       | 0       | NS | 0 | ☐ | ☐ | ☐ | ☐ | ☐ | nicotinate-nucleotide<br>pyrophosphorylase | TIGR00078  | TIGR00078(nadC: nicotinate-<br>nucleotide diphosphorylase<br>(carboxylating)) |
| Supercontig_1.51_MV<br>LG_04510_10sp  | -484,22353 | -484,22351 | 0       | 0       | NS | 0 | ☐ | ☐ | ☐ | ☐ | ☐ | hypothetical protein                       | NA         | NA                                                                            |
| Supercontig_1.23_MV<br>LG_02788_7sp   | -835,93582 | -835,93564 | 0,00036 | 0,00018 | NS | 0 | ☐ | ☐ | ☐ | ☐ | ☐ | tubulin beta chain                         | PF00091.18 | Tubulin(Tubulin/FtsZ family,<br>GTPase domain)                                |
| Supercontig_1.2_MVL<br>G_00315_6sp    | -963,96475 | -963,96474 | 0       | 0       | NS | 0 | ☐ | ☐ | ☐ | ☐ | ☐ | hypothetical protein                       | PF10348.2  | DUF2427(Domain of unknown<br>function (DUF2427))                              |
| Supercontig_1.54_MV<br>LG_04673_12sp  | -487,59722 | -487,59722 | 0       | 0       | NS | 0 | ☐ | ☐ | ☐ | ☐ | ☐ | hypothetical protein                       | NA         | NA                                                                            |
| Supercontig_1.4_MVL<br>G_00710_10sp   | -1429,3934 | -1428,5359 | 1,7149  | 0,57576 | NS | 0 | ☐ | ☐ | ☐ | ☐ | ☐ | hypothetical protein                       | NA         | NA                                                                            |
| Supercontig_1.10_MV<br>LG_01651_9sp   | -594,30474 | -594,30474 | 0       | 0       | NS | 0 | ☐ | ☐ | ☐ | ☐ | ☐ | hypothetical protein                       | NA         | NA                                                                            |
| Supercontig_1.17_MV<br>LG_02316_9sp   | -1313,3609 | -1312,9643 | 0,79308 | 0,32736 | NS | 0 | ☐ | ☐ | ☐ | ☐ | ☐ | hypothetical protein                       | PF00443.22 | UCH(Ubiquitin carboxyl-terminal<br>hydrolase)                                 |
| Supercontig_1.55_MV<br>LG_04729_10sp  | -632,58955 | -630,89565 | 3,3878  | 0,8162  | NS | 0 | ☐ | ☐ | ☐ | ☐ | ☐ | hypothetical protein                       | TIGR02180  | TIGR02180(GRX_euk:<br>Glutaredoxin)                                           |

|                                      |            |            |         |         |    |   |  |  |  |  |                         |            |                                                                        |
|--------------------------------------|------------|------------|---------|---------|----|---|--|--|--|--|-------------------------|------------|------------------------------------------------------------------------|
| Supercontig_1.122_MV<br>LG_06460_8sp | -785,66755 | -785,66755 | 0       | 0       | NS | 0 |  |  |  |  | hypothetical protein    | PF09797.2  | NatB_MDM20(N-acetyltransferase B complex (NatB) non catalytic subunit) |
| Supercontig_1.45_MV<br>LG_04218_6sp  | -895,81411 | -895,81411 | 0       | 0       | NS | 0 |  |  |  |  | hypothetical protein    | PF00439.18 | Bromodomain(Bromodomain)                                               |
| Supercontig_1.18_MV<br>LG_02400_11sp | -858,59013 | -858,42527 | 0,32972 | 0,15199 | NS | 0 |  |  |  |  | hypothetical protein    | PF00076.15 | RRM_1(RNA recognition motif. (a.k.a. RRM, RBD, or RNP domain))         |
| Supercontig_1.116_MV<br>LG_06376_6sp | -473,91025 | -473,88184 | 0,05682 | 0,02801 | NS | 0 |  |  |  |  | hypothetical protein    | NA         | NA                                                                     |
| Supercontig_1.11_MV<br>LG_01791_6sp  | -709,91022 | -709,8972  | 0,02604 | 0,01294 | NS | 0 |  |  |  |  | hypothetical protein    | NA         | NA                                                                     |
| Supercontig_1.30_MV<br>LG_03284_10sp | -832,55178 | -832,55174 | 0       | 0       | NS | 0 |  |  |  |  | hypothetical protein    | PF01369.13 | Sec7(Sec7 domain)                                                      |
| Supercontig_1.17_MV<br>LG_02299_9sp  | -967,07306 | -967,07305 | 0       | 0       | NS | 0 |  |  |  |  | hypothetical protein    | NA         | NA                                                                     |
| Supercontig_1.45_MV<br>LG_04212_9sp  | -1159,2345 | -1159,0419 | 0,3853  | 0,17523 | NS | 0 |  |  |  |  | hypothetical protein    | PF06422.5  | PDR_CDR(CDR ABC transporter)                                           |
| Supercontig_1.32_MV<br>LG_03386_10sp | -627,59948 | -627,55566 | 0,08764 | 0,04287 | NS | 0 |  |  |  |  | hypothetical protein    | NA         | NA                                                                     |
| Supercontig_1.36_MV<br>LG_03668_10sp | -411,21641 | -408,877   | 4,67882 | 0,90362 | *  | 0 |  |  |  |  | hypothetical protein    | PF00270.22 | DEAD(DEAD/DEAH box helicase)                                           |
| Supercontig_1.32_MV<br>LG_03404_10sp | -521,8892  | -521,8892  | 0       | 0       | NS | 0 |  |  |  |  | hypothetical protein    | PF02815.12 | MIR(MIR domain)                                                        |
| Supercontig_1.18_MV<br>LG_02410_10sp | -774,5774  | -773,30578 | 2,54324 | 0,71962 | NS | 0 |  |  |  |  | AGC/DMPK protein kinase | PF07714.10 | Pkinase_Tyr(Protein tyrosine kinase)                                   |

**B**

|                                       |          |          |       |      |     |   |  |  |  |                                        |                               |           |                                                      |
|---------------------------------------|----------|----------|-------|------|-----|---|--|--|--|----------------------------------------|-------------------------------|-----------|------------------------------------------------------|
| Supercontig_1.167_MV<br>LG_06924_9sp  | -776,16  | -773,25  | 5,83  | 0,95 | *   | 1 |  |  |  | <b>[48S]</b>                           | hypothetical protein          | NA        | NA                                                   |
| Supercontig_1.103_MV<br>LG_06196_11sp | -511,82  | -507,56  | 8,51  | 0,99 | **  | 1 |  |  |  | <b>['10W']</b>                         | mannosyl transferase          | PF11051.1 | Mannosyl_trans3(Mannosyltransferase putative)        |
| Supercontig_1.230_MV<br>LG_07186_10sp | -412,73  | -408,52  | 8,42  | 0,99 | **  | 1 |  |  |  | <b>['2V']</b>                          | hypothetical protein          | NA        | NA                                                   |
| Supercontig_1.119_MV<br>LG_06419_12sp | -856,65  | -852,51  | 8,29  | 0,98 | **  | 2 |  |  |  | <b>['20T', '69T']</b>                  | hypothetical protein          | PF08601.3 | PAP1(Transcription factor PAP1)                      |
| Supercontig_1.71_MV<br>LG_05356_9sp   | -644,12  | -640,57  | 7,10  | 0,97 | **  | 1 |  |  |  | <b>['43T']</b>                         | hypothetical protein          | NA        | NA                                                   |
| Supercontig_1.72_MV<br>LG_05394_7sp   | -572,06  | -568,71  | 6,70  | 0,96 | **  | 1 |  |  |  | <b>['4S']</b>                          | uroporphyrinogen-III synthase | PF02602.8 | HEM4(Uroporphyrinogen-III synthase HemD)             |
| Supercontig_1.90_MV<br>LG_05914_8sp   | -576,20  | -572,93  | 6,55  | 0,96 | **  | 1 |  |  |  | <b>['84Y']</b>                         | hypothetical protein          | PF06325.6 | PrmA(Ribosomal protein L11 methyltransferase (PrmA)) |
| Supercontig_1.133_MV<br>LG_06610_9sp  | -532,16  | -522,64  | 19,04 | 1,00 | *** | 1 |  |  |  | <b>['49Q']</b>                         | hypothetical protein          | NA        | NA                                                   |
| Supercontig_1.108_MV<br>LG_06269_8sp  | -2589,51 | -2583,08 | 12,87 | 1,00 | *** | 4 |  |  |  | <b>['23I', '113E', '205I', '295E']</b> | hypothetical protein          | NA        | NA                                                   |
| Supercontig_1.108_MV<br>LG_06272_7sp  | -1334,55 | -1329,66 | 9,77  | 0,99 | *** | 1 |  |  |  | <b>['37F']</b>                         | hypothetical protein          | NA        | NA                                                   |
| Supercontig_1.133_MV<br>LG_06611_12sp | -1408,84 | -1403,57 | 10,55 | 0,99 | *** | 1 |  |  |  | <b>['97A']</b>                         | Proteophosphoglycan           | NA        | NA                                                   |
| Supercontig_1.153_MV<br>LG_06801_7sp  | -455,20  | -450,08  | 10,25 | 0,99 | *** | 2 |  |  |  | <b>['9V', '35E']</b>                   | hypothetical protein          | NA        | NA                                                   |

|                                       |          |          |      |                              |    |   |   |   |       |                               |            |                                                         |
|---------------------------------------|----------|----------|------|------------------------------|----|---|---|---|-------|-------------------------------|------------|---------------------------------------------------------|
| Supercontig_1.169_MV<br>LG_06936_9sp  | -629,56  | -627,38  | 4,36 | 0,89                         | NS | 1 | □ | □ | [49A] | hypothetical protein          | TIGR00037  | TIGR00037(eIF_5A: translation initiation factor eIF-5A) |
| Supercontig_1.136_MV<br>LG_06643_10sp | -461,82  | -465,98  | 0,00 | 0,00                         | NS | 0 | □ | □ | □     | hypothetical protein          | PF07774.6  | DUF1620(Protein of unknown function (DUF1620))          |
| Supercontig_1.106_MV<br>LG_06232_10sp | -348,38  | -348,25  | 0,27 | 0,13                         | NS | 0 | □ | □ | □     | hypothetical protein          | PF01184.12 | Grp1_Fun34_YaaH(GPR1/FUN34/yaaH family)                 |
| Supercontig_1.218_MV<br>LG_07152_10sp | -810,35  | -810,35  | 0,00 | 0,00                         | NS | 0 | □ | □ | □     | hypothetical protein          | PF03159.11 | XRN_N(XRN 5'-3' exonuclease N-terminus)                 |
| Supercontig_1.144_MV<br>LG_06728_10sp | -640,32  | -639,57  | 1,49 | 0,53                         | NS | 0 | □ | □ | □     | hypothetical protein          | NA         | NA                                                      |
| Supercontig_1.420_MV<br>LG_07266_10sp | -310,48  | -310,48  | 0,00 | 0,00                         | NS | 0 | □ | □ | □     | hypothetical protein          | NA         | NA                                                      |
| Supercontig_1.145_MV<br>LG_06734_10sp | -960,13  | -960,13  | 0,00 | 0,00                         | NS | 0 | □ | □ | □     | hypothetical protein          | TIGR00840  | TIGR00840(b_cpa1: sodium/hydrogen exchanger 3)          |
| Supercontig_1.106_MV<br>LG_06237_8sp  | -735,87  | -735,87  | 0,00 | 0,00                         | NS | 0 | □ | □ | □     | hypothetical protein          | NA         | NA                                                      |
| Supercontig_1.178_MV<br>LG_06987_7sp  | -1244,47 | -1244,47 | 0,00 | 5.99982<br>0011188<br>31e-05 | NS | 0 | □ | □ | □     | hypothetical protein          | PF00085.13 | Thioredoxin(Thioredoxin)                                |
| Supercontig_1.157_MV<br>LG_06842_8sp  | -616,51  | -616,51  | 0,00 | 0,00                         | NS | 0 | □ | □ | □     | hypothetical protein          | NA         | NA                                                      |
| Supercontig_1.137_MV<br>LG_06648_11sp | -490,15  | -490,15  | 0,00 | 0,00                         | NS | 0 | □ | □ | □     | hypothetical protein          | NA         | NA                                                      |
| Supercontig_1.169_MV<br>LG_06933_9sp  | -681,40  | -681,40  | 0,00 | 0,00                         | NS | 0 | □ | □ | □     | hypothetical protein          | PF00782.13 | DSPc(Dual specificity phosphatase, catalytic domain)    |
| Supercontig_1.169_MV<br>LG_06934_9sp  | -482,72  | -482,72  | 0,00 | 0,00                         | NS | 0 | □ | □ | □     | hypothetical protein          | NA         | NA                                                      |
| Supercontig_1.217_MV<br>LG_07148_9sp  | -677,92  | -677,66  | 0,51 | 0,22                         | NS | 0 | □ | □ | □     | hypothetical protein          | NA         | NA                                                      |
| Supercontig_1.153_MV<br>LG_06797_7sp  | -736,05  | -736,05  | 0,00 | 0,00                         | NS | 0 | □ | □ | □     | hypothetical protein          | PF08617.3  | CGI-121(Kinase binding protein CGI-121)                 |
| Supercontig_1.136_MV<br>LG_06639_7sp  | -467,87  | -467,87  | 0,00 | 0,00                         | NS | 0 | □ | □ | □     | protein KES1                  | PF01237.11 | Oxysterol_BP(Oxysterol-binding protein)                 |
| Supercontig_1.137_MV<br>LG_06647_8sp  | -1503,68 | -1501,87 | 3,61 | 0,84                         | NS | 0 | □ | □ | □     | hypothetical protein          | NA         | NA                                                      |
| Supercontig_1.71_MV<br>LG_05370_11sp  | -618,83  | -618,83  | 0,00 | 0,00                         | NS | 0 | □ | □ | □     | hypothetical protein          | PF00400.25 | WD40(WD domain, G-beta repeat)                          |
| Supercontig_1.201_MV<br>LG_07087_9sp  | -500,21  | -500,06  | 0,29 | 0,13                         | NS | 0 | □ | □ | □     | STE/STE20/PAKA protein kinase | PF07714.10 | Pkinase_Tyr(Protein tyrosine kinase)                    |
| Supercontig_1.145_MV<br>LG_06731_9sp  | -877,04  | -876,91  | 0,25 | 0,12                         | NS | 0 | □ | □ | □     | hypothetical protein          | PF01195.12 | Pept_tRNA_hydro(Peptidyl-tRNA hydrolase)                |
| Supercontig_1.273_MV<br>LG_07224_6sp  | -443,50  | -443,50  | 0,00 | 0,00                         | NS | 0 | □ | □ | □     | hypothetical protein          | NA         | NA                                                      |
| Supercontig_1.71_MV<br>LG_05343_11sp  | -399,76  | -398,03  | 3,46 | 0,82                         | NS | 0 | □ | □ | □     | hypothetical protein          | PF07690.9  | MFS_1(Major Facilitator Superfamily)                    |
| Supercontig_1.230_MV<br>LG_07187_6sp  | -1177,10 | -1177,10 | 0,00 | 0,00                         | NS | 0 | □ | □ | □     | hypothetical protein          | NA         | NA                                                      |

|                                       |          |          |                              |                              |    |   |   |   |   |   |                                                                 |            |                                                          |
|---------------------------------------|----------|----------|------------------------------|------------------------------|----|---|---|---|---|---|-----------------------------------------------------------------|------------|----------------------------------------------------------|
| Supercontig_1.188_MV<br>LG_07036_9sp  | -458,04  | -458,04  | 0,00                         | 0,00                         | NS | 0 | □ | □ | □ | □ | phospho-2-dehydro-3-deoxyheptonate aldolase, tyrosine-inhibited | TIGR00034  | TIGR00034(aroFGH: 3-deoxy-7-phosphoheptulonate synthase) |
| Supercontig_1.108_MV<br>LG_06268_7sp  | -579,33  | -579,33  | 0,00                         | 0,00                         | NS | 0 | □ | □ | □ | □ | hypothetical protein                                            | TIGR01126  | TIGR01126(pdi_dom: protein disulfide-isomerase domain)   |
| Supercontig_1.167_MV<br>LG_06926_8sp  | -654,80  | -654,77  | 0,05                         | 0,03                         | NS | 0 | □ | □ | □ | □ | hypothetical protein                                            | NA         | NA                                                       |
| Supercontig_1.146_MV<br>LG_06743_8sp  | -445,18  | -443,46  | 3,45                         | 0,82                         | NS | 0 | □ | □ | □ | □ | hypothetical protein                                            | NA         | NA                                                       |
| Supercontig_1.167_MV<br>LG_06919_10sp | -544,42  | -544,35  | 0,15                         | 0,07                         | NS | 0 | □ | □ | □ | □ | hypothetical protein                                            | PF07646.8  | Keich_2(Keich motif)                                     |
| Supercontig_1.103_MV<br>LG_06186_6sp  | -1822,95 | -1822,95 | 1.99999<br>9994950<br>49e-05 | 9.99994<br>9974919<br>35e-06 | NS | 0 | □ | □ | □ | □ | hypothetical protein                                            | NA         | NA                                                       |
| Supercontig_1.217_MV<br>LG_07147_9sp  | -655,93  | -655,62  | 0,63                         | 0,27                         | NS | 0 | □ | □ | □ | □ | hypothetical protein                                            | PF01569.14 | PAP2(PAP2 superfamily)                                   |
| Supercontig_1.179_MV<br>LG_06989_10sp | -336,69  | -336,69  | 0,00                         | 0,00                         | NS | 0 | □ | □ | □ | □ | hypothetical protein                                            | PF02714.8  | DUF221(Domain of unknown function DUF221)                |
| Supercontig_1.157_MV<br>LG_06845_9sp  | -637,35  | -637,35  | 0,00                         | 0,00                         | NS | 0 | □ | □ | □ | □ | hypothetical protein                                            | NA         | NA                                                       |
| Supercontig_1.108_MV<br>LG_06270_10sp | -434,20  | -434,20  | 0,00                         | 0,00                         | NS | 0 | □ | □ | □ | □ | hypothetical protein                                            | PF00169.22 | PH(PH domain)                                            |
| Supercontig_1.146_MV<br>LG_06740_7sp  | -319,47  | -319,47  | 0,00                         | 0,00                         | NS | 0 | □ | □ | □ | □ | hypothetical protein                                            | NA         | NA                                                       |
| Supercontig_1.137_MV<br>LG_06645_6sp  | -543,37  | -543,37  | 4.00000<br>0012638<br>34e-05 | 1.99998<br>0006452<br>38e-05 | NS | 0 | □ | □ | □ | □ | hypothetical protein                                            | NA         | NA                                                       |
| Supercontig_1.72_MV<br>LG_05389_12sp  | -637,17  | -637,16  | 0,02                         | 0,01                         | NS | 0 | □ | □ | □ | □ | hypothetical protein                                            | PF04851.8  | ResIII(Type III restriction enzyme, res subunit)         |
| Supercontig_1.90_MV<br>LG_05913_6sp   | -1030,02 | -1030,02 | 0,00                         | 0,00                         | NS | 0 | □ | □ | □ | □ | hypothetical protein                                            | TIGR00627  | TIGR00627(tfb4: transcription factor tfb4)               |
| Supercontig_1.72_MV<br>LG_05386_9sp   | -920,42  | -920,42  | 0,00                         | 0,00                         | NS | 0 | □ | □ | □ | □ | hypothetical protein                                            | PF00097.18 | zf-C3HC4(Zinc finger, C3HC4 type (RING finger))          |
| Supercontig_1.169_MV<br>LG_06935_10sp | -1023,11 | -1022,18 | 1,86                         | 0,61                         | NS | 0 | □ | □ | □ | □ | hypothetical protein                                            | PF12397.1  | U3snoRNP10(U3 small nucleolar RNA-associated protein 10) |
| Supercontig_1.153_MV<br>LG_06799_7sp  | -388,20  | -388,20  | 0,00                         | 0,00                         | NS | 0 | □ | □ | □ | □ | hypothetical protein                                            | NA         | NA                                                       |
| Supercontig_1.182_MV<br>LG_07011_6sp  | -658,20  | -658,20  | 0,00                         | 0,00                         | NS | 0 | □ | □ | □ | □ | hypothetical protein                                            | NA         | NA                                                       |
| Supercontig_1.71_MV<br>LG_05349_9sp   | -1007,55 | -1007,55 | 0,00                         | 0,00                         | NS | 0 | □ | □ | □ | □ | hypothetical protein                                            | PF01138.14 | RNase_PH(3' exoribonuclease family, domain 1)            |
| Supercontig_1.114_MV<br>LG_06355_9sp  | -444,33  | -444,33  | 0,00                         | 0,00                         | NS | 0 | □ | □ | □ | □ | 60S ribosomal protein L20                                       | PF01775.10 | Ribosomal_L18ae(Ribosomal L18ae/LX protein domain)       |
| Supercontig_1.218_MV<br>LG_07153_6sp  | -543,94  | -543,92  | 0,04                         | 0,02                         | NS | 0 | □ | □ | □ | □ | hypothetical protein                                            | NA         | NA                                                       |
| Supercontig_1.193_MV<br>LG_07053_7sp  | -681,74  | -681,74  | 0,00                         | 0,00                         | NS | 0 | □ | □ | □ | □ | uricase                                                         | TIGR03383  | TIGR03383(urate_oxi: urate oxidase)                      |





|                                       |          |          |                              |                              |    |   |   |   |   |   |                                                  |           |                                                                  |
|---------------------------------------|----------|----------|------------------------------|------------------------------|----|---|---|---|---|---|--------------------------------------------------|-----------|------------------------------------------------------------------|
| Supercontig_1.71_MV<br>LG_05367_12sp  | -960,88  | -958,71  | 4,34                         | 0,89                         | NS | 0 | □ | □ | □ | □ | hypothetical protein                             | NA        | NA                                                               |
| Supercontig_1.146_MV<br>LG_06739_6sp  | -861,46  | -861,46  | 0,00                         | 0,00                         | NS | 0 | □ | □ | □ | □ | hypothetical protein                             | NA        | NA                                                               |
| Supercontig_1.115_MV<br>LG_06367_7sp  | -772,04  | -771,98  | 0,12                         | 0,06                         | NS | 0 | □ | □ | □ | □ | hypothetical protein                             | NA        | NA                                                               |
| Supercontig_1.162_MV<br>LG_06880_8sp  | -793,64  | -793,64  | 0,00                         | 0,00                         | NS | 0 | □ | □ | □ | □ | hypothetical protein                             | PF04729.6 | ASF1_hist_chap(ASF1 like histone chaperone)                      |
| Supercontig_1.133_MV<br>LG_06607_10sp | -965,26  | -965,26  | 0,00                         | 0,00                         | NS | 0 | □ | □ | □ | □ | hypothetical protein                             | NA        | NA                                                               |
| Supercontig_1.167_MV<br>LG_06923_6sp  | -972,05  | -971,22  | 1,66                         | 0,56                         | NS | 0 | □ | □ | □ | □ | hypothetical protein                             | NA        | NA                                                               |
| Supercontig_1.114_MV<br>LG_06360_9sp  | -588,08  | -588,08  | 2.00000<br>0017687<br>85e-05 | 9.99995<br>0088605<br>05e-06 | NS | 0 | □ | □ | □ | □ | hypothetical protein                             | NA        | NA                                                               |
| Supercontig_1.72_MV<br>LG_05377_9sp   | -462,18  | -462,18  | 0,00                         | 0,00                         | NS | 0 | □ | □ | □ | □ | hypothetical protein                             | NA        | NA                                                               |
| Supercontig_1.72_MV<br>LG_05397_11sp  | -1077,03 | -1077,03 | 0,00                         | 0,00                         | NS | 0 | □ | □ | □ | □ | hypothetical protein                             | PF08558.3 | TRF(Telomere repeat binding factor (TRF))                        |
| Supercontig_1.118_MV<br>LG_06408_10sp | -480,84  | -480,84  | 0,00                         | 9.99950<br>0014156<br>3e-05  | NS | 0 | □ | □ | □ | □ | hypothetical protein                             | NA        | NA                                                               |
| Supercontig_1.182_MV<br>LG_07012_6sp  | -685,15  | -685,15  | 0,00                         | 0,00                         | NS | 0 | □ | □ | □ | □ | deoxyuridine 5'-triphosphate nucleotidohydrolase | TIGR00576 | TIGR00576(dut: dUTP diphosphatase)                               |
| Supercontig_1.146_MV<br>LG_06738_9sp  | -443,29  | -441,28  | 4,02                         | 0,87                         | NS | 0 | □ | □ | □ | □ | hypothetical protein                             | NA        | NA                                                               |
| Supercontig_1.72_MV<br>LG_05398_6sp   | -604,10  | -602,45  | 3,30                         | 0,81                         | NS | 0 | □ | □ | □ | □ | hypothetical protein                             | NA        | NA                                                               |
| Supercontig_1.72_MV<br>LG_05390_10sp  | -1190,80 | -1190,80 | 0,00                         | 0,00                         | NS | 0 | □ | □ | □ | □ | hypothetical protein                             | PF08101.4 | DUF1708(Domain of unknown function (DUF1708))                    |
| Supercontig_1.405_MV<br>LG_07262_10sp | -615,91  | -614,37  | 3,08                         | 0,79                         | NS | 0 | □ | □ | □ | □ | hypothetical protein                             | NA        | NA                                                               |
| Supercontig_1.146_MV<br>LG_06737_7sp  | -613,08  | -610,52  | 5,12                         | 0,92                         | *  | 0 | □ | □ | □ | □ | hypothetical protein                             | NA        | NA                                                               |
| Supercontig_1.71_MV<br>LG_05344_6sp   | -315,64  | -315,64  | 6.00000<br>0007588<br>82e-05 | 2.99995<br>5004244<br>29e-05 | NS | 0 | □ | □ | □ | □ | hypothetical protein                             | TIGR00091 | TIGR00091(TIGR00091: tRNA (guanine-N(7)-)-methyltransferase)     |
| Supercontig_1.71_MV<br>LG_05369_7sp   | -692,18  | -692,18  | 0,00                         | 0,00                         | NS | 0 | □ | □ | □ | □ | hypothetical protein                             | PF08241.5 | Methyltransf_11(Methyltransferase domain)                        |
| Supercontig_1.72_MV<br>LG_05382_6sp   | -619,27  | -619,27  | 0,00                         | 0,00                         | NS | 0 | □ | □ | □ | □ | hypothetical protein                             | NA        | NA                                                               |
| Supercontig_1.137_MV<br>LG_06644_6sp  | -432,62  | -432,62  | 0,00                         | 0,00                         | NS | 0 | □ | □ | □ | □ | hypothetical protein                             | NA        | NA                                                               |
| Supercontig_1.72_MV<br>LG_05402_10sp  | -445,17  | -445,08  | 0,19                         | 0,09                         | NS | 0 | □ | □ | □ | □ | hypothetical protein                             | NA        | NA                                                               |
| Supercontig_1.214_MV<br>LG_07139_7sp  | -832,56  | -832,56  | 0,00                         | 0,00                         | NS | 0 | □ | □ | □ | □ | hypothetical protein                             | PF10540.2 | Membr_traf_MHD(Munc13 (mammalian uncoordinated) homology domain) |

|                                       |          |          |      |                              |    |   |  |  |  |  |                                           |            |                                                                |
|---------------------------------------|----------|----------|------|------------------------------|----|---|--|--|--|--|-------------------------------------------|------------|----------------------------------------------------------------|
| Supercontig_1.146_MV<br>LG_06742_9sp  | -1107,77 | -1107,76 | 0,01 | 0,01                         | NS | 0 |  |  |  |  | hypothetical protein                      | PF00494.12 | SQS_PSY(Squalene/phytoene synthase)                            |
| Supercontig_1.118_MV<br>LG_06407_9sp  | -563,09  | -563,09  | 0,00 | 0,00                         | NS | 0 |  |  |  |  | hypothetical protein                      | PF00106.18 | adh_short(short chain dehydrogenase)                           |
| Supercontig_1.108_MV<br>LG_06264_10sp | -640,76  | -640,76  | 0,00 | 0,00                         | NS | 0 |  |  |  |  | hypothetical protein                      | PF07524.6  | Bromo_TP(Bromodomain associated)                               |
| Supercontig_1.162_MV<br>LG_06878_7sp  | -896,78  | -894,67  | 4,21 | 0,88                         | NS | 0 |  |  |  |  | hypothetical protein                      | NA         | NA                                                             |
| Supercontig_1.133_MV<br>LG_06609_6sp  | -724,10  | -721,13  | 5,94 | 0,95                         | *  | 0 |  |  |  |  | hypothetical protein                      | PF10275.2  | Peptidase_C65(Peptidase C65 Otubain)                           |
| Supercontig_1.103_MV<br>LG_06194_7sp  | -548,91  | -548,91  | 0,00 | 0,00                         | NS | 0 |  |  |  |  | hypothetical protein                      | PF04450.5  | BSP(Plant Basic Secretory Protein)                             |
| Supercontig_1.201_MV<br>LG_07086_10sp | -646,71  | -646,71  | 0,00 | 0,00                         | NS | 0 |  |  |  |  | hypothetical protein                      | PF03810.12 | IBN_N(Imporin-beta N-terminal domain)                          |
| Supercontig_1.106_MV<br>LG_06231_6sp  | -826,54  | -826,54  | 0,00 | 0,00                         | NS | 0 |  |  |  |  | hypothetical protein                      | NA         | NA                                                             |
| Supercontig_1.153_MV<br>LG_06798_9sp  | -454,26  | -454,23  | 0,06 | 0,03                         | NS | 0 |  |  |  |  | hypothetical protein                      | NA         | NA                                                             |
| Supercontig_1.144_MV<br>LG_06726_7sp  | -412,57  | -412,57  | 0,00 | 0,00                         | NS | 0 |  |  |  |  | hypothetical protein                      | PF03715.6  | Noc2(Noc2p family)                                             |
| Supercontig_1.72_MV<br>LG_05391_7sp   | -674,35  | -673,32  | 2,05 | 0,64                         | NS | 0 |  |  |  |  | hypothetical protein                      | PF05653.7  | DUF803(Protein of unknown function (DUF803))                   |
| Supercontig_1.71_MV<br>LG_05355_11sp  | -394,12  | -394,12  | 0,00 | 0,00                         | NS | 0 |  |  |  |  | hypothetical protein                      | PF01784.11 | NIF3(NIF3 (NGG1p interacting factor 3))                        |
| Supercontig_1.106_MV<br>LG_06236_10sp | -977,67  | -977,67  | 0,00 | 6.99975<br>5010780<br>28e-05 | NS | 0 |  |  |  |  | hypothetical protein                      | NA         | NA                                                             |
| Supercontig_1.134_MV<br>LG_06618_11sp | -459,95  | -459,44  | 1,02 | 0,40                         | NS | 0 |  |  |  |  | hypothetical protein                      | NA         | NA                                                             |
| Supercontig_1.90_MV<br>LG_05907_9sp   | -386,29  | -385,10  | 2,39 | 0,70                         | NS | 0 |  |  |  |  | hypothetical protein                      | PF00076.15 | RRM_1(RNA recognition motif. (a.k.a. RRM, RBD, or RNP domain)) |
| Supercontig_1.145_MV<br>LG_06730_10sp | -477,78  | -475,73  | 4,10 | 0,87                         | NS | 0 |  |  |  |  | adenosinetriphosphate                     | PF00270.22 | DEAD(DEAD/DEAH box helicase)                                   |
| Supercontig_1.103_MV<br>LG_06184_7sp  | -498,57  | -498,55  | 0,04 | 0,02                         | NS | 0 |  |  |  |  | hypothetical protein                      | PF00565.10 | SNase(Staphylococcal nuclease homologue)                       |
| Supercontig_1.187_MV<br>LG_07034_6sp  | -344,26  | -344,26  | 0,00 | 5.99981<br>9999820<br>31e-05 | NS | 0 |  |  |  |  | U3 small nucleolar ribonucleoprotein IMP3 | PF01479.18 | S4(S4 domain)                                                  |
| Supercontig_1.153_MV<br>LG_06795_11sp | -844,91  | -844,91  | 0,00 | 0,00                         | NS | 0 |  |  |  |  | hypothetical protein                      | PF03357.14 | Snf7(Snf7)                                                     |
| Supercontig_1.195_MV<br>LG_07059_7sp  | -764,88  | -763,65  | 2,46 | 0,71                         | NS | 0 |  |  |  |  | hypothetical protein                      | PF04699.7  | P16-Arc(ARP2/3 complex 16 kDa subunit (p16-Arc))               |
| Supercontig_1.72_MV<br>LG_05378_6sp   | -765,28  | -765,24  | 0,07 | 0,04                         | NS | 0 |  |  |  |  | hypothetical protein                      | PF00856.21 | SET(SET domain)                                                |
| Supercontig_1.90_MV<br>LG_05916_7sp   | -767,43  | -767,43  | 0,00 | 0,00                         | NS | 0 |  |  |  |  | hypothetical protein                      | PF11899.1  | DUF3419(Protein of unknown function (DUF3419))                 |
| Supercontig_1.134_MV<br>LG_06615_10sp | -586,25  | -585,49  | 1,52 | 0,53                         | NS | 0 |  |  |  |  | hypothetical protein                      | PF05529.5  | Bap31(B-cell receptor-associated protein 31-like)              |

|                                      |          |          |                              |                              |    |   |   |   |   |                                                    |            |                                                               |
|--------------------------------------|----------|----------|------------------------------|------------------------------|----|---|---|---|---|----------------------------------------------------|------------|---------------------------------------------------------------|
| Supercontig_1.71_MV<br>LG_05368_8sp  | -744,89  | -744,89  | 0,00                         | 0,00                         | NS | 0 | □ | □ | □ | DNA-directed RNA<br>polymerase III subunit<br>RPC2 | PF04565.9  | RNA_pol_Rpb2_3(RNA<br>polymerase Rpb2, domain 3)              |
| Supercontig_1.136_MV<br>LG_06642_9sp | -593,89  | -593,65  | 0,48                         | 0,21                         | NS | 0 | □ | □ | □ | hypothetical protein                               | PF03345.7  | DDOST_48kD(Oligosaccharyltra<br>nsferase 48 kDa subunit beta) |
| Supercontig_1.179_MV<br>LG_06990_8sp | -322,15  | -322,15  | 0,00                         | 4.99987<br>5006512<br>33e-05 | NS | 0 | □ | □ | □ | hypothetical protein                               | NA         | NA                                                            |
| Supercontig_1.157_MV<br>LG_06844_7sp | -414,76  | -414,40  | 0,73                         | 0,31                         | NS | 0 | □ | □ | □ | hypothetical protein                               | NA         | NA                                                            |
| Supercontig_1.162_MV<br>LG_06877_8sp | -415,65  | -414,78  | 1,72                         | 0,58                         | NS | 0 | □ | □ | □ | hypothetical protein                               | PF04573.5  | SPC22(Signal peptidase subunit)                               |
| Supercontig_1.71_MV<br>LG_05350_9sp  | -611,47  | -611,47  | 0,00                         | 0,00                         | NS | 0 | □ | □ | □ | hypothetical protein                               | PF02770.12 | Acyl-CoA_dh_M(Acyl-CoA<br>dehydrogenase, middle domain)       |
| Supercontig_1.71_MV<br>LG_05363_6sp  | -285,90  | -285,84  | 0,13                         | 0,06                         | NS | 0 | □ | □ | □ | hypothetical protein                               | PF10775.2  | ATP_sub_h(ATP synthase<br>complex subunit h)                  |
| Supercontig_1.119_MV<br>LG_06420_8sp | -385,07  | -382,96  | 4,22                         | 0,88                         | NS | 0 | □ | □ | □ | hypothetical protein                               | PF02466.12 | Tim17(Tim17/Tim22/Tim23<br>family)                            |
| Supercontig_1.103_MV<br>LG_06191_8sp | -536,06  | -536,06  | 1.99999<br>9994950<br>49e-05 | 9.99994<br>9974919<br>35e-06 | NS | 0 | □ | □ | □ | hypothetical protein                               | PF00642.17 | zf-CCCH(Zinc finger C-x8-C-x5-<br>C-x3-H type (and similar))  |
| Supercontig_1.90_MV<br>LG_05905_9sp  | -355,48  | -355,44  | 0,08                         | 0,04                         | NS | 0 | □ | □ | □ | mitochondrial 2-<br>oxodicarboxylate<br>carrier 2  | PF00153.20 | Mito_carr(Mitochondrial carrier<br>protein)                   |
| Supercontig_1.118_MV<br>LG_06409_9sp | -387,67  | -387,67  | 0,00                         | 0,00                         | NS | 0 | □ | □ | □ | CMGC/MAPK/P38<br>protein kinase                    | PF07714.10 | Pkinase_Tyr(Protein tyrosine<br>kinase)                       |
| Supercontig_1.72_MV<br>LG_05376_9sp  | -1117,64 | -1117,64 | 0,00                         | 0,00                         | NS | 0 | □ | □ | □ | hypothetical protein                               | NA         | NA                                                            |
| Supercontig_1.71_MV<br>LG_05357_9sp  | -991,58  | -991,54  | 0,07                         | 0,03                         | NS | 0 | □ | □ | □ | hypothetical protein                               | PF00928.14 | Adap_comp_sub(Adaptor<br>complexes medium subunit<br>family)  |
| Supercontig_1.179_MV<br>LG_06993_7sp | -523,61  | -522,19  | 2,85                         | 0,76                         | NS | 0 | □ | □ | □ | hypothetical protein                               | NA         | NA                                                            |
| Supercontig_1.71_MV<br>LG_05361_7sp  | -280,33  | -280,33  | 0,01                         | 0,01                         | NS | 0 | □ | □ | □ | hypothetical protein                               | PF04387.7  | PTPLA(Protein tyrosine<br>phosphatase-like protein,<br>PTPLA) |
| Supercontig_1.72_MV<br>LG_05384_12sp | -735,86  | -735,86  | 0,00                         | 0,00                         | NS | 0 | □ | □ | □ | hypothetical protein                               | PF00012.13 | HSP70(Hsp70 protein)                                          |
| Supercontig_1.133_MV<br>LG_06612_8sp | -2103,41 | -2100,92 | 4,98                         | 0,92                         | *  | 0 | □ | □ | □ | hypothetical protein                               | PF04969.9  | CS(CS domain)                                                 |
| Supercontig_1.208_MV<br>LG_07121_8sp | -1114,96 | -1114,86 | 0,19                         | 0,09                         | NS | 0 | □ | □ | □ | hypothetical protein                               | PF03828.12 | PAP_assoc(Poly(A) polymerase)                                 |
| Supercontig_1.144_MV<br>LG_06727_6sp | -261,22  | -261,22  | 7.99999<br>9991170<br>63e-05 | 3.99991<br>9996652<br>15e-05 | NS | 0 | □ | □ | □ | hypothetical protein                               | NA         | NA                                                            |

|                                       |          |          |                              |                              |    |   |   |   |   |   |                                  |            |                                                                             |
|---------------------------------------|----------|----------|------------------------------|------------------------------|----|---|---|---|---|---|----------------------------------|------------|-----------------------------------------------------------------------------|
| Supercontig_1.144_MV<br>LG_06724_7sp  | -1218,48 | -1218,48 | 1.99999<br>9994950<br>49e-05 | 9.99994<br>9974919<br>35e-06 | NS | 0 | □ | □ | □ | □ | hypothetical protein             | PF00611.16 | FCH(Fes/CIP4 homology domain)                                               |
| Supercontig_1.118_MV<br>LG_06405_7sp  | -319,21  | -318,35  | 1,72                         | 0,58                         | NS | 0 | □ | □ | □ | □ | hypothetical protein             | NA         | NA                                                                          |
| Supercontig_1.193_MV<br>LG_07052_10sp | -549,65  | -548,53  | 2,24                         | 0,67                         | NS | 0 | □ | □ | □ | □ | hypothetical protein             | PF00319.11 | SRF-TF(SRF-type transcription factor (DNA-binding and dimerisation domain)) |
| Supercontig_1.71_MV<br>LG_05364_9sp   | -701,50  | -701,36  | 0,28                         | 0,13                         | NS | 0 | □ | □ | □ | □ | 60S ribosomal protein L21-A      | PF01157.11 | Ribosomal_L21e(Ribosomal protein L21e)                                      |
| Supercontig_1.177_MV<br>LG_06982_7sp  | -987,06  | -986,54  | 1,04                         | 0,41                         | NS | 0 | □ | □ | □ | □ | hypothetical protein             | PF03635.10 | Vps35(Vacuolar protein sorting-associated protein 35)                       |
| Supercontig_1.72_MV<br>LG_05393_6sp   | -506,05  | -506,05  | 0,00                         | 0,00                         | NS | 0 | □ | □ | □ | □ | hypothetical protein             | PF00153.20 | Mito_carr(Mitochondrial carrier protein)                                    |
| Supercontig_1.119_MV<br>LG_06418_9sp  | -377,06  | -375,68  | 2,76                         | 0,75                         | NS | 0 | □ | □ | □ | □ | hypothetical protein             | PF10075.2  | PCI_Csn8(COP9 signalosome, subunit CSN8)                                    |
| Supercontig_1.218_MV<br>LG_07151_7sp  | -500,11  | -499,13  | 1,96                         | 0,62                         | NS | 0 | □ | □ | □ | □ | hypothetical protein             | NA         | NA                                                                          |
| Supercontig_1.106_MV<br>LG_06230_9sp  | -420,51  | -420,51  | 0,00                         | 0,00                         | NS | 0 | □ | □ | □ | □ | hypothetical protein             | NA         | NA                                                                          |
| Supercontig_1.119_MV<br>LG_06416_10sp | -655,61  | -655,42  | 0,38                         | 0,17                         | NS | 0 | □ | □ | □ | □ | hypothetical protein             | NA         | NA                                                                          |
| Supercontig_1.90_MV<br>LG_05912_9sp   | -331,97  | -331,49  | 0,95                         | 0,38                         | NS | 0 | □ | □ | □ | □ | hypothetical protein             | PF00564.17 | PB1(PB1 domain)                                                             |
| Supercontig_1.71_MV<br>LG_05345_9sp   | -537,16  | -537,16  | 0,00                         | 0,00                         | NS | 0 | □ | □ | □ | □ | hypothetical protein             | PF00171.15 | Aldedh(Aldehyde dehydrogenase family)                                       |
| Supercontig_1.115_MV<br>LG_06368_8sp  | -498,74  | -497,56  | 2,35                         | 0,69                         | NS | 0 | □ | □ | □ | □ | hypothetical protein             | NA         | NA                                                                          |
| Supercontig_1.144_MV<br>LG_06725_8sp  | -1038,14 | -1038,13 | 0,00                         | 0,00                         | NS | 0 | □ | □ | □ | □ | hypothetical protein             | PF06870.5  | RNA_pol_I_A49(A49-like RNA polymerase I associated factor)                  |
| Supercontig_1.72_MV<br>LG_05387_10sp  | -379,46  | -379,46  | 0,00                         | 0,00                         | NS | 0 | □ | □ | □ | □ | hypothetical protein             | PF00400.25 | WD40(WD domain, G-beta repeat)                                              |
| Supercontig_1.217_MV<br>LG_07146_10sp | -479,61  | -479,61  | 0,00                         | 0,00                         | NS | 0 | □ | □ | □ | □ | T-complex protein 1 subunit beta | TIGR02341  | TIGR02341(chap_CCT_beta: T-complex protein 1, beta subunit)                 |
| Supercontig_1.72_MV<br>LG_05399_10sp  | -605,25  | -605,25  | 0,00                         | 0,00                         | NS | 0 | □ | □ | □ | □ | hypothetical protein             | PF01937.12 | DUF89(Protein of unknown function DUF89)                                    |
| Supercontig_1.103_MV<br>LG_06195_8sp  | -467,28  | -467,28  | 2.00000<br>0006319<br>17e-05 | 9.99995<br>0031762<br>2e-06  | NS | 0 | □ | □ | □ | □ | hypothetical protein             | PF12542.1  | CWC25(Pre-mRNA splicing factor)                                             |
| Supercontig_1.219_MV<br>LG_07155_8sp  | -794,84  | -794,84  | 0,00                         | 0,00                         | NS | 0 | □ | □ | □ | □ | hypothetical protein             | PF02450.8  | LACT(Lecithin:cholesterol acyltransferase)                                  |
| Supercontig_1.138_MV<br>LG_06656_10sp | -756,41  | -755,13  | 2,55                         | 0,72                         | NS | 0 | □ | □ | □ | □ | hypothetical protein             | NA         | NA                                                                          |
| Supercontig_1.72_MV<br>LG_05379_7sp   | -554,65  | -554,27  | 0,75                         | 0,31                         | NS | 0 | □ | □ | □ | □ | hypothetical protein             | NA         | NA                                                                          |



|                                       |          |          |                              |                              |    |   |   |   |   |   |                      |            |                                            |
|---------------------------------------|----------|----------|------------------------------|------------------------------|----|---|---|---|---|---|----------------------|------------|--------------------------------------------|
| Supercontig_1.103_MV<br>LG_06193_10sp | -819,53  | -819,02  | 1,02                         | 0,40                         | NS | 0 | □ | □ | □ | □ | hypothetical protein | PF07819.6  | PGAP1(PGAP1-like protein)                  |
| Supercontig_1.182_MV<br>LG_07013_10sp | -311,96  | -311,85  | 0,23                         | 0,11                         | NS | 0 | □ | □ | □ | □ | hypothetical protein | PF00225.16 | Kinesin(Kinesin motor domain)              |
| Supercontig_1.72_MV<br>LG_05400_12sp  | -672,31  | -672,31  | 3.99999<br>9989900<br>97e-05 | 1.99997<br>9995083<br>92e-05 | NS | 0 | □ | □ | □ | □ | hypothetical protein | PF03435.11 | Saccharop_dh(Saccharopine dehydrogenase)   |
| Supercontig_1.118_MV<br>LG_06404_6sp  | -453,07  | -453,07  | 0,00                         | 0,00                         | NS | 0 | □ | □ | □ | □ | hypothetical protein | NA         | NA                                         |
| Supercontig_1.72_MV<br>LG_05392_8sp   | -544,76  | -544,59  | 0,35                         | 0,16                         | NS | 0 | □ | □ | □ | □ | hypothetical protein | PF04178.5  | Got1(Got1/Sft2-like family)                |
| Supercontig_1.177_MV<br>LG_06985_11sp | -516,93  | -516,93  | 1.99999<br>9994950<br>49e-05 | 9.99994<br>9974919<br>35e-06 | NS | 0 | □ | □ | □ | □ | hypothetical protein | NA         | NA                                         |
| Supercontig_1.146_MV<br>LG_06741_10sp | -439,40  | -439,40  | 1.99999<br>9994950<br>49e-05 | 9.99994<br>9974919<br>35e-06 | NS | 0 | □ | □ | □ | □ | hypothetical protein | PF00135.21 | COesterase(Carboxylesterase)               |
| Supercontig_1.106_MV<br>LG_06233_9sp  | -1993,61 | -1993,54 | 0,14                         | 0,07                         | NS | 0 | □ | □ | □ | □ | hypothetical protein | PF00443.22 | UCH(Ubiquitin carboxyl-terminal hydrolase) |

C

|                                      |          |          |       |      |     |   |   |         |         |   |                                              |            |                                                                        |
|--------------------------------------|----------|----------|-------|------|-----|---|---|---------|---------|---|----------------------------------------------|------------|------------------------------------------------------------------------|
| Supercontig_1.37_MV<br>LG_03701_7sp  | -460,61  | -455,26  | 10,69 | 1,00 | *** | 1 | □ | ["22W"] | □       | □ | hypothetical protein                         | NA         | NA                                                                     |
| Supercontig_1.37_MV<br>LG_03730_7sp  | -537,71  | -532,46  | 10,50 | 0,99 | *** | 1 | □ | ["24T"] | □       | □ | hypothetical protein                         | NA         | NA                                                                     |
| Supercontig_1.43_MV<br>LG_04125_11sp | -779,90  | -774,48  | 10,84 | 1,00 | *** | 1 | □ | ["72N"] | □       | □ | DNA-directed RNA polymerase III subunit rpc1 | PF00623.13 | RNA_pol_Rpb1_2(RNA polymerase Rpb1, domain 2)                          |
| Supercontig_1.37_MV<br>LG_03732_9sp  | -685,39  | -684,54  | 1,69  | 0,57 | NS  | 1 | □ | □       | ["79Q"] | □ | hypothetical protein                         | PF01522.14 | Polysacc_deac_1(Polysaccharide deacetylase)                            |
| Supercontig_1.37_MV<br>LG_03719_7sp  | -806,85  | -805,98  | 1,73  | 0,58 | NS  | 0 | □ | □       | □       | □ | hypothetical protein                         | PF00076.15 | RRM_1(RNA recognition motif. (a.k.a. RRM, RBD, or RNP domain))         |
| Supercontig_1.37_MV<br>LG_03717_10sp | -451,75  | -451,73  | 0,04  | 0,02 | NS  | 0 | □ | □       | □       | □ | hypothetical protein                         | NA         | NA                                                                     |
| Supercontig_1.37_MV<br>LG_03706_8sp  | -882,39  | -882,39  | 0,00  | 0,00 | NS  | 0 | □ | □       | □       | □ | hypothetical protein                         | NA         | NA                                                                     |
| Supercontig_1.37_MV<br>LG_03757_11sp | -406,71  | -406,71  | 0,00  | 0,00 | NS  | 0 | □ | □       | □       | □ | hypothetical protein                         | PF02201.11 | SWIB(SWIB/MDM2 domain)                                                 |
| Supercontig_1.43_MV<br>LG_04101_11sp | -392,98  | -392,98  | 0,00  | 0,00 | NS  | 0 | □ | □       | □       | □ | hypothetical protein                         | PF00520.24 | lon_trans(lon transport protein)                                       |
| Supercontig_1.37_MV<br>LG_03756_6sp  | -375,60  | -375,60  | 0,00  | 0,00 | NS  | 0 | □ | □       | □       | □ | hypothetical protein                         | NA         | NA                                                                     |
| Supercontig_1.37_MV<br>LG_03713_12sp | -555,36  | -554,85  | 1,01  | 0,40 | NS  | 0 | □ | □       | □       | □ | CAMK/CAMKL/KIN4 protein kinase               | PF07714.10 | Pkinase_Tyr(Protein tyrosine kinase)                                   |
| Supercontig_1.37_MV<br>LG_03752_7sp  | -540,34  | -540,34  | 0,00  | 0,00 | NS  | 0 | □ | □       | □       | □ | hypothetical protein                         | PF04695.6  | Pex14_N(Peroxisomal membrane anchor protein (Pex14p) conserved region) |
| Supercontig_1.37_MV<br>LG_03716_6sp  | -1167,28 | -1167,28 | 0,00  | 0,00 | NS  | 0 | □ | □       | □       | □ | hypothetical protein                         | PF07969.4  | Amidohydro_3(Amidohydrolase family)                                    |

|                                      |         |         |                              |                              |    |   |   |   |   |   |                                                  |            |                                                              |
|--------------------------------------|---------|---------|------------------------------|------------------------------|----|---|---|---|---|---|--------------------------------------------------|------------|--------------------------------------------------------------|
| Supercontig_1.37_MV<br>LG_03718_6sp  | -375,08 | -375,07 | 0,02                         | 0,01                         | NS | 0 | □ | □ | □ | □ | hypothetical protein                             | PF05983.4  | Med7(MED7 protein)                                           |
| Supercontig_1.43_MV<br>LG_04130_9sp  | -665,50 | -665,32 | 0,36                         | 0,17                         | NS | 0 | □ | □ | □ | □ | hypothetical protein                             | NA         | NA                                                           |
| Supercontig_1.37_MV<br>LG_03739_9sp  | -658,05 | -657,86 | 0,38                         | 0,17                         | NS | 0 | □ | □ | □ | □ | hypothetical protein                             | PF07524.6  | Bromo_TP(Bromodomain associated)                             |
| Supercontig_1.37_MV<br>LG_03724_8sp  | -971,20 | -971,20 | 0,00                         | 0,00                         | NS | 0 | □ | □ | □ | □ | hypothetical protein                             | PF08651.3  | DASH_Duo1(DASH complex subunit Duo1)                         |
| Supercontig_1.43_MV<br>LG_04094_12sp | -780,33 | -780,33 | 0,00                         | 0,00                         | NS | 0 | □ | □ | □ | □ | ribonucleoside-diphosphate reductase large chain | PF02867.8  | Ribonuc_red_IgC(Ribonucleotide reductase, barrel domain)     |
| Supercontig_1.43_MV<br>LG_04095_10sp | -546,61 | -546,61 | 0,00                         | 0,00                         | NS | 0 | □ | □ | □ | □ | hypothetical protein                             | PF06398.4  | Pex24p(Integral peroxisomal membrane peroxin)                |
| Supercontig_1.37_MV<br>LG_03727_9sp  | -469,65 | -469,65 | 0,00                         | 0,00                         | NS | 0 | □ | □ | □ | □ | 3'(2'),5'-bisphosphate nucleotidase              | TIGR01330  | TIGR01330(bisphos_HAL2: 3'(2'),5'-bisphosphate nucleotidase) |
| Supercontig_1.43_MV<br>LG_04112_9sp  | -888,71 | -888,71 | 0,00                         | 0,00                         | NS | 0 | □ | □ | □ | □ | hypothetical protein                             | PF00226.24 | DnaJ(DnaJ domain)                                            |
| Supercontig_1.37_MV<br>LG_03747_6sp  | -709,13 | -707,43 | 3,39                         | 0,82                         | NS | 0 | □ | □ | □ | □ | hypothetical protein                             | PF00295.10 | Glyco_hydro_28(Glycosyl hydrolases family 28)                |
| Supercontig_1.37_MV<br>LG_03705_7sp  | -410,64 | -410,64 | 0,00                         | 0,00                         | NS | 0 | □ | □ | □ | □ | hypothetical protein                             | PF00013.22 | KH_1(KH domain)                                              |
| Supercontig_1.43_MV<br>LG_04127_6sp  | -746,68 | -746,68 | 0,00                         | 0,00                         | NS | 0 | □ | □ | □ | □ | hypothetical protein                             | PF08450.5  | SGL(SMP-30/Gluconolactonase/LRE-like region)                 |
| Supercontig_1.37_MV<br>LG_03738_9sp  | -508,87 | -508,87 | 2.00000<br>0006319<br>17e-05 | 9.99995<br>0031762<br>2e-06  | NS | 0 | □ | □ | □ | □ | hypothetical protein                             | PF01432.13 | Peptidase_M3(Peptidase family M3)                            |
| Supercontig_1.43_MV<br>LG_04099_10sp | -542,03 | -542,03 | 0,00                         | 0,00                         | NS | 0 | □ | □ | □ | □ | hypothetical protein                             | PF09088.4  | MIF4G_like(MIF4G like)                                       |
| Supercontig_1.37_MV<br>LG_03715_6sp  | -568,34 | -567,87 | 0,93                         | 0,37                         | NS | 0 | □ | □ | □ | □ | hypothetical protein                             | NA         | NA                                                           |
| Supercontig_1.37_MV<br>LG_03729_10sp | -715,87 | -715,87 | 0,00                         | 0,00                         | NS | 0 | □ | □ | □ | □ | hypothetical protein                             | TIGR00290  | TIGR00290(MJ0570_dom: MJ0570-related uncharacterized domain) |
| Supercontig_1.37_MV<br>LG_03734_8sp  | -372,42 | -372,42 | 0,00                         | 0,00                         | NS | 0 | □ | □ | □ | □ | hypothetical protein                             | PF01522.14 | Polysacc_deac_1(Polysaccharide deacetylase)                  |
| Supercontig_1.43_MV<br>LG_04097_9sp  | -464,25 | -464,25 | 4.00000<br>0001269<br>65e-05 | 1.99998<br>0000768<br>15e-05 | NS | 0 | □ | □ | □ | □ | hypothetical protein                             | NA         | NA                                                           |
| Supercontig_1.37_MV<br>LG_03728_12sp | -333,82 | -333,82 | 0,00                         | 0,00                         | NS | 0 | □ | □ | □ | □ | hypothetical protein                             | PF00940.12 | RNA_pol(DNA-dependent RNA polymerase)                        |
| Supercontig_1.37_MV<br>LG_03742_6sp  | -595,00 | -595,00 | 0,00                         | 5.99981<br>9999820<br>31e-05 | NS | 0 | □ | □ | □ | □ | hypothetical protein                             | NA         | NA                                                           |

|                                      |          |          |                              |                              |    |   |   |   |   |   |                                                           |            |                                                 |
|--------------------------------------|----------|----------|------------------------------|------------------------------|----|---|---|---|---|---|-----------------------------------------------------------|------------|-------------------------------------------------|
| Supercontig_1.43_MV<br>LG_04115_6sp  | -310,64  | -310,64  | 5.99999<br>9996220<br>14e-05 | 2.99995<br>4998560<br>12e-05 | NS | 0 | □ | □ | □ | □ | hypothetical protein                                      | NA         | NA                                              |
| Supercontig_1.43_MV<br>LG_04109_12sp | -732,68  | -732,68  | 9.99999<br>9997489<br>79e-05 | 4.99987<br>5000828<br>27e-05 | NS | 0 | □ | □ | □ | □ | hypothetical protein                                      | PF12157.1  | DUF3591(Protein of unknown function (DUF3591))  |
| Supercontig_1.37_MV<br>LG_03725_10sp | -569,10  | -569,10  | 0,00                         | 0,00                         | NS | 0 | □ | □ | □ | □ | hypothetical protein                                      | PF01207.10 | Dus(Dihydrouridine synthase (Dus))              |
| Supercontig_1.37_MV<br>LG_03731_10sp | -400,45  | -400,45  | 9.99999<br>9997489<br>79e-05 | 4.99987<br>5000828<br>27e-05 | NS | 0 | □ | □ | □ | □ | hypothetical protein                                      | NA         | NA                                              |
| Supercontig_1.43_MV<br>LG_04132_8sp  | -550,39  | -550,25  | 0,29                         | 0,13                         | NS | 0 | □ | □ | □ | □ | hypothetical protein                                      | PF00097.18 | zf-C3HC4(Zinc finger, C3HC4 type (RING finger)) |
| Supercontig_1.37_MV<br>LG_03708_9sp  | -622,12  | -619,98  | 4,28                         | 0,88                         | NS | 0 | □ | □ | □ | □ | hypothetical protein                                      | PF01937.12 | DUF89(Protein of unknown function DUF89)        |
| Supercontig_1.37_MV<br>LG_03711_9sp  | -812,55  | -812,55  | 0,00                         | 0,00                         | NS | 0 | □ | □ | □ | □ | hypothetical protein                                      | PF01565.16 | FAD_binding_4(FAD binding domain)               |
| Supercontig_1.43_MV<br>LG_04110_11sp | -666,03  | -666,03  | 0,00                         | 0,00                         | NS | 0 | □ | □ | □ | □ | hypothetical protein                                      | PF11696.1  | DUF3292(Protein of unknown function (DUF3292))  |
| Supercontig_1.43_MV<br>LG_04114_7sp  | -666,49  | -666,49  | 0,00                         | 0,00                         | NS | 0 | □ | □ | □ | □ | hypothetical protein                                      | NA         | NA                                              |
| Supercontig_1.43_MV<br>LG_04131_7sp  | -896,15  | -896,15  | 0,00                         | 0,00                         | NS | 0 | □ | □ | □ | □ | catalase                                                  | PF00199.12 | Catalase(Catalase)                              |
| Supercontig_1.43_MV<br>LG_04129_7sp  | -1252,36 | -1252,35 | 0,00                         | 0,00                         | NS | 0 | □ | □ | □ | □ | hypothetical protein                                      | PF08711.4  | Med26(TFIIIS helical bundle-like domain)        |
| Supercontig_1.37_MV<br>LG_03720_7sp  | -468,29  | -468,26  | 0,07                         | 0,03                         | NS | 0 | □ | □ | □ | □ | GTP-binding protein ypt5                                  | PF04670.5  | Gtr1_RagA(Gtr1/RagA G protein conserved region) |
| Supercontig_1.43_MV<br>LG_04108_6sp  | -361,27  | -361,20  | 0,14                         | 0,07                         | NS | 0 | □ | □ | □ | □ | DNA-directed RNA polymerase I, II, and III subunit RPABC2 | PF01192.15 | RNA_pol_Rpb6(RNA polymerase Rpb6)               |
| Supercontig_1.37_MV<br>LG_03736_8sp  | -910,05  | -909,82  | 0,46                         | 0,21                         | NS | 0 | □ | □ | □ | □ | hypothetical protein                                      | NA         | NA                                              |
| Supercontig_1.37_MV<br>LG_03743_7sp  | -606,48  | -606,29  | 0,39                         | 0,18                         | NS | 0 | □ | □ | □ | □ | hypothetical protein                                      | NA         | NA                                              |
| Supercontig_1.37_MV<br>LG_03714_10sp | -490,20  | -490,13  | 0,15                         | 0,07                         | NS | 0 | □ | □ | □ | □ | hypothetical protein                                      | NA         | NA                                              |
| Supercontig_1.43_MV<br>LG_04102_9sp  | -625,28  | -625,28  | 0,00                         | 0,00                         | NS | 0 | □ | □ | □ | □ | hypothetical protein                                      | NA         | NA                                              |
| Supercontig_1.37_MV<br>LG_03753_8sp  | -957,48  | -957,41  | 0,13                         | 0,06                         | NS | 0 | □ | □ | □ | □ | hypothetical protein                                      | PF00096.19 | zf-C2H2(Zinc finger, C2H2 type)                 |
| Supercontig_1.43_MV<br>LG_04119_8sp  | -557,36  | -556,56  | 1,61                         | 0,55                         | NS | 0 | □ | □ | □ | □ | hypothetical protein                                      | NA         | NA                                              |
| Supercontig_1.37_MV<br>LG_03709_9sp  | -517,96  | -517,96  | 0,00                         | 0,00                         | NS | 0 | □ | □ | □ | □ | hypothetical protein                                      | PF08613.4  | Cyclin(Cyclin)                                  |
| Supercontig_1.43_MV<br>LG_04120_7sp  | -362,37  | -362,37  | 0,00                         | 0,00                         | NS | 0 | □ | □ | □ | □ | hypothetical protein                                      | NA         | NA                                              |
| Supercontig_1.37_MV<br>LG_03754_9sp  | -406,87  | -406,87  | 0,00                         | 0,00                         | NS | 0 | □ | □ | □ | □ | hypothetical protein                                      | PF00498.19 | FHA(FHA domain)                                 |



|                                      |          |          |                              |                              |     |   |   |       |       |   |                                              |            |                                                                   |
|--------------------------------------|----------|----------|------------------------------|------------------------------|-----|---|---|-------|-------|---|----------------------------------------------|------------|-------------------------------------------------------------------|
| Supercontig_1.43_MV<br>LG_04123_6sp  | -595,86  | -595,08  | 1,55                         | 0,54                         | NS  | 0 | □ | □     | □     | □ | hypothetical protein                         | NA         | NA                                                                |
| Supercontig_1.43_MV<br>LG_04111_8sp  | -633,08  | -633,08  | 0,00                         | 0,00                         | NS  | 0 | □ | □     | □     | □ | hypothetical protein                         | PF08487.3  | VIT(Vault protein inter-alpha-trypsin)                            |
| Supercontig_1.37_MV<br>LG_03722_8sp  | -391,43  | -391,43  | 2.00000<br>0006319<br>17e-05 | 9.99995<br>0031762<br>2e-06  | NS  | 0 | □ | □     | □     | □ | hypothetical protein                         | NA         | NA                                                                |
| Supercontig_1.43_MV<br>LG_04113_11sp | -945,05  | -945,05  | 0,00                         | 0,00                         | NS  | 0 | □ | □     | □     | □ | hypothetical protein                         | PF04910.7  | DUF654(Protein of unknown function, DUF654)                       |
| Supercontig_1.37_MV<br>LG_03712_12sp | -461,72  | -461,72  | 0,00                         | 0,00                         | NS  | 0 | □ | □     | □     | □ | hypothetical protein                         | PF06428.4  | Sec2p(GDP/GTP exchange factor Sec2p)                              |
| Supercontig_1.43_MV<br>LG_04124_10sp | -613,62  | -613,62  | 0,00                         | 0,00                         | NS  | 0 | □ | □     | □     | □ | hypothetical protein                         | TIGR00059  | TIGR00059(L17: ribosomal protein L17)                             |
| Supercontig_1.37_MV<br>LG_03710_7sp  | -479,79  | -479,79  | 7.99999<br>9991170<br>63e-05 | 3.99991<br>9996652<br>15e-05 | NS  | 0 | □ | □     | □     | □ | hypothetical protein                         | PF01553.14 | Acyltransferase(Acyltransferase)                                  |
| Supercontig_1.37_MV<br>LG_03737_7sp  | -464,23  | -464,07  | 0,32                         | 0,15                         | NS  | 0 | □ | □     | □     | □ | hypothetical protein                         | NA         | NA                                                                |
| Supercontig_1.43_MV<br>LG_04117_10sp | -602,16  | -602,16  | 0,00                         | 0,00                         | NS  | 0 | □ | □     | □     | □ | hypothetical protein                         | PF05236.7  | TAF4(Transcription initiation factor TFIID component TAF4 family) |
| Supercontig_1.37_MV<br>LG_03723_12sp | -394,98  | -394,98  | 0,00                         | 0,00                         | NS  | 0 | □ | □     | □     | □ | hypothetical protein                         | TIGR00879  | TIGR00879(SP: MFS transporter, sugar porter (SP) family)          |
| Supercontig_1.43_MV<br>LG_04121_6sp  | -658,72  | -658,72  | 0,00                         | 0,00                         | NS  | 0 | □ | □     | □     | □ | hypothetical protein                         | NA         | NA                                                                |
| Supercontig_1.37_MV<br>LG_03755_8sp  | -427,92  | -427,92  | 0,00                         | 0,00                         | NS  | 0 | □ | □     | □     | □ | cytochrome c oxidase subunit Va              | PF02284.9  | COX5A(Cytochrome c oxidase subunit Va)                            |
| Supercontig_1.37_MV<br>LG_03758_7sp  | -2081,50 | -2081,12 | 0,76                         | 0,32                         | NS  | 0 | □ | □     | □     | □ | hypothetical protein                         | NA         | NA                                                                |
| Supercontig_1.37_MV<br>LG_03701_7sp  | -460,61  | -455,26  | 10,69                        | 1,00                         | *** | 1 | □ | [22W] | □     | □ | hypothetical protein                         | NA         | NA                                                                |
| Supercontig_1.37_MV<br>LG_03730_7sp  | -537,71  | -532,46  | 10,50                        | 0,99                         | *** | 1 | □ | [24T] | □     | □ | hypothetical protein                         | NA         | NA                                                                |
| Supercontig_1.43_MV<br>LG_04125_11sp | -779,90  | -774,48  | 10,84                        | 1,00                         | *** | 1 | □ | [72N] | □     | □ | DNA-directed RNA polymerase III subunit rpc1 | PF00623.13 | RNA_pol_Rpb1_2(RNA polymerase Rpb1, domain 2)                     |
| Supercontig_1.37_MV<br>LG_03732_9sp  | -685,39  | -684,54  | 1,69                         | 0,57                         | NS  | 1 | □ | □     | [79Q] | □ | hypothetical protein                         | PF01522.14 | Polysacc_deac_1(Polysaccharide deacetylase)                       |
| Supercontig_1.37_MV<br>LG_03719_7sp  | -806,85  | -805,98  | 1,73                         | 0,58                         | NS  | 0 | □ | □     | □     | □ | hypothetical protein                         | PF00076.15 | RRM_1(RNA recognition motif. (a.k.a. RRM, RBD, or RNP domain))    |
| Supercontig_1.37_MV<br>LG_03717_10sp | -451,75  | -451,73  | 0,04                         | 0,02                         | NS  | 0 | □ | □     | □     | □ | hypothetical protein                         | NA         | NA                                                                |
| Supercontig_1.37_MV<br>LG_03706_8sp  | -882,39  | -882,39  | 0,00                         | 0,00                         | NS  | 0 | □ | □     | □     | □ | hypothetical protein                         | NA         | NA                                                                |
| Supercontig_1.37_MV<br>LG_03757_11sp | -406,71  | -406,71  | 0,00                         | 0,00                         | NS  | 0 | □ | □     | □     | □ | hypothetical protein                         | PF02201.11 | SWIB(SWIB/MDM2 domain)                                            |
| Supercontig_1.43_MV<br>LG_04101_11sp | -392,98  | -392,98  | 0,00                         | 0,00                         | NS  | 0 | □ | □     | □     | □ | hypothetical protein                         | PF00520.24 | lon_trans(lon transport protein)                                  |



|                                      |          |          |                              |                              |    |   |  |  |  |  |                                                           |            |                                                 |
|--------------------------------------|----------|----------|------------------------------|------------------------------|----|---|--|--|--|--|-----------------------------------------------------------|------------|-------------------------------------------------|
| Supercontig_1.37_MV<br>LG_03728_12sp | -333,82  | -333,82  | 0,00                         | 0,00                         | NS | 0 |  |  |  |  | hypothetical protein                                      | PF00940.12 | RNA_pol(DNA-dependent RNA polymerase)           |
| Supercontig_1.37_MV<br>LG_03742_6sp  | -595,00  | -595,00  | 0,00                         | 5.99981<br>9999820<br>31e-05 | NS | 0 |  |  |  |  | hypothetical protein                                      | NA         | NA                                              |
| Supercontig_1.43_MV<br>LG_04115_6sp  | -310,64  | -310,64  | 5.99999<br>9996220<br>14e-05 | 2.99995<br>4998560<br>12e-05 | NS | 0 |  |  |  |  | hypothetical protein                                      | NA         | NA                                              |
| Supercontig_1.43_MV<br>LG_04109_12sp | -732,68  | -732,68  | 9.99999<br>9997489<br>79e-05 | 4.99987<br>5000828<br>27e-05 | NS | 0 |  |  |  |  | hypothetical protein                                      | PF12157.1  | DUF3591(Protein of unknown function (DUF3591))  |
| Supercontig_1.37_MV<br>LG_03725_10sp | -569,10  | -569,10  | 0,00                         | 0,00                         | NS | 0 |  |  |  |  | hypothetical protein                                      | PF01207.10 | Dus(Dihydrouridine synthase (Dus))              |
| Supercontig_1.37_MV<br>LG_03731_10sp | -400,45  | -400,45  | 9.99999<br>9997489<br>79e-05 | 4.99987<br>5000828<br>27e-05 | NS | 0 |  |  |  |  | hypothetical protein                                      | NA         | NA                                              |
| Supercontig_1.43_MV<br>LG_04132_8sp  | -550,39  | -550,25  | 0,29                         | 0,13                         | NS | 0 |  |  |  |  | hypothetical protein                                      | PF00097.18 | zf-C3HC4(Zinc finger, C3HC4 type (RING finger)) |
| Supercontig_1.37_MV<br>LG_03708_9sp  | -622,12  | -619,98  | 4,28                         | 0,88                         | NS | 0 |  |  |  |  | hypothetical protein                                      | PF01937.12 | DUF89(Protein of unknown function DUF89)        |
| Supercontig_1.37_MV<br>LG_03711_9sp  | -812,55  | -812,55  | 0,00                         | 0,00                         | NS | 0 |  |  |  |  | hypothetical protein                                      | PF01565.16 | FAD_binding_4(FAD binding domain)               |
| Supercontig_1.43_MV<br>LG_04110_11sp | -666,03  | -666,03  | 0,00                         | 0,00                         | NS | 0 |  |  |  |  | hypothetical protein                                      | PF11696.1  | DUF3292(Protein of unknown function (DUF3292))  |
| Supercontig_1.43_MV<br>LG_04114_7sp  | -666,49  | -666,49  | 0,00                         | 0,00                         | NS | 0 |  |  |  |  | hypothetical protein                                      | NA         | NA                                              |
| Supercontig_1.43_MV<br>LG_04131_7sp  | -896,15  | -896,15  | 0,00                         | 0,00                         | NS | 0 |  |  |  |  | catalase                                                  | PF00199.12 | Catalase(Catalase)                              |
| Supercontig_1.43_MV<br>LG_04129_7sp  | -1252,36 | -1252,35 | 0,00                         | 0,00                         | NS | 0 |  |  |  |  | hypothetical protein                                      | PF08711.4  | Med26(TFIIS helical bundle-like domain)         |
| Supercontig_1.37_MV<br>LG_03720_7sp  | -468,29  | -468,26  | 0,07                         | 0,03                         | NS | 0 |  |  |  |  | GTP-binding protein ypt5                                  | PF04670.5  | Gtr1_RagA(Gtr1/RagA G protein conserved region) |
| Supercontig_1.43_MV<br>LG_04108_6sp  | -361,27  | -361,20  | 0,14                         | 0,07                         | NS | 0 |  |  |  |  | DNA-directed RNA polymerase I, II, and III subunit RPABC2 | PF01192.15 | RNA_pol_Rpb6(RNA polymerase Rpb6)               |
| Supercontig_1.37_MV<br>LG_03736_8sp  | -910,05  | -909,82  | 0,46                         | 0,21                         | NS | 0 |  |  |  |  | hypothetical protein                                      | NA         | NA                                              |
| Supercontig_1.37_MV<br>LG_03743_7sp  | -606,48  | -606,29  | 0,39                         | 0,18                         | NS | 0 |  |  |  |  | hypothetical protein                                      | NA         | NA                                              |
| Supercontig_1.37_MV<br>LG_03714_10sp | -490,20  | -490,13  | 0,15                         | 0,07                         | NS | 0 |  |  |  |  | hypothetical protein                                      | NA         | NA                                              |
| Supercontig_1.43_MV<br>LG_04102_9sp  | -625,28  | -625,28  | 0,00                         | 0,00                         | NS | 0 |  |  |  |  | hypothetical protein                                      | NA         | NA                                              |
| Supercontig_1.37_MV<br>LG_03753_8sp  | -957,48  | -957,41  | 0,13                         | 0,06                         | NS | 0 |  |  |  |  | hypothetical protein                                      | PF00096.19 | zf-C2H2(Zinc finger, C2H2 type)                 |
| Supercontig_1.43_MV<br>LG_04119_8sp  | -557,36  | -556,56  | 1,61                         | 0,55                         | NS | 0 |  |  |  |  | hypothetical protein                                      | NA         | NA                                              |

|                                      |          |          |                              |                              |    |   |   |   |   |   |                                    |            |                                                                         |
|--------------------------------------|----------|----------|------------------------------|------------------------------|----|---|---|---|---|---|------------------------------------|------------|-------------------------------------------------------------------------|
| Supercontig_1.37_MV<br>LG_03709_9sp  | -517,96  | -517,96  | 0,00                         | 0,00                         | NS | 0 | ☐ | ☐ | ☐ | ☐ | hypothetical protein               | PF08613.4  | Cyclin(Cyclin)                                                          |
| Supercontig_1.43_MV<br>LG_04120_7sp  | -362,37  | -362,37  | 0,00                         | 0,00                         | NS | 0 | ☐ | ☐ | ☐ | ☐ | hypothetical protein               | NA         | NA                                                                      |
| Supercontig_1.37_MV<br>LG_03754_9sp  | -406,87  | -406,87  | 0,00                         | 0,00                         | NS | 0 | ☐ | ☐ | ☐ | ☐ | hypothetical protein               | PF00498.19 | FHA(FHA domain)                                                         |
| Supercontig_1.43_MV<br>LG_04123_6sp  | -595,86  | -595,08  | 1,55                         | 0,54                         | NS | 0 | ☐ | ☐ | ☐ | ☐ | hypothetical protein               | NA         | NA                                                                      |
| Supercontig_1.43_MV<br>LG_04111_8sp  | -633,08  | -633,08  | 0,00                         | 0,00                         | NS | 0 | ☐ | ☐ | ☐ | ☐ | hypothetical protein               | PF08487.3  | VIT(Vault protein inter-alpha-<br>trypsin)                              |
| Supercontig_1.37_MV<br>LG_03722_8sp  | -391,43  | -391,43  | 2.00000<br>0006319<br>17e-05 | 9.99995<br>0031762<br>2e-06  | NS | 0 | ☐ | ☐ | ☐ | ☐ | hypothetical protein               | NA         | NA                                                                      |
| Supercontig_1.43_MV<br>LG_04113_11sp | -945,05  | -945,05  | 0,00                         | 0,00                         | NS | 0 | ☐ | ☐ | ☐ | ☐ | hypothetical protein               | PF04910.7  | DUF654(Protein of unknown<br>function, DUF654)                          |
| Supercontig_1.37_MV<br>LG_03712_12sp | -461,72  | -461,72  | 0,00                         | 0,00                         | NS | 0 | ☐ | ☐ | ☐ | ☐ | hypothetical protein               | PF06428.4  | Sec2p(GDP/GTP exchange<br>factor Sec2p)                                 |
| Supercontig_1.43_MV<br>LG_04124_10sp | -613,62  | -613,62  | 0,00                         | 0,00                         | NS | 0 | ☐ | ☐ | ☐ | ☐ | hypothetical protein               | TIGR00059  | TIGR00059(L17: ribosomal<br>protein L17)                                |
| Supercontig_1.37_MV<br>LG_03710_7sp  | -479,79  | -479,79  | 7.99999<br>9991170<br>63e-05 | 3.99991<br>9996652<br>15e-05 | NS | 0 | ☐ | ☐ | ☐ | ☐ | hypothetical protein               | PF01553.14 | Acyltransferase(Acyltransferase)                                        |
| Supercontig_1.37_MV<br>LG_03737_7sp  | -464,23  | -464,07  | 0,32                         | 0,15                         | NS | 0 | ☐ | ☐ | ☐ | ☐ | hypothetical protein               | NA         | NA                                                                      |
| Supercontig_1.43_MV<br>LG_04117_10sp | -602,16  | -602,16  | 0,00                         | 0,00                         | NS | 0 | ☐ | ☐ | ☐ | ☐ | hypothetical protein               | PF05236.7  | TAF4(Transcription initiation<br>factor TFIID component TAF4<br>family) |
| Supercontig_1.37_MV<br>LG_03723_12sp | -394,98  | -394,98  | 0,00                         | 0,00                         | NS | 0 | ☐ | ☐ | ☐ | ☐ | hypothetical protein               | TIGR00879  | TIGR00879(SP: MFS<br>transporter, sugar porter (SP)<br>family)          |
| Supercontig_1.43_MV<br>LG_04121_6sp  | -658,72  | -658,72  | 0,00                         | 0,00                         | NS | 0 | ☐ | ☐ | ☐ | ☐ | hypothetical protein               | NA         | NA                                                                      |
| Supercontig_1.37_MV<br>LG_03755_8sp  | -427,92  | -427,92  | 0,00                         | 0,00                         | NS | 0 | ☐ | ☐ | ☐ | ☐ | cytochrome c oxidase<br>subunit Va | PF02284.9  | COX5A(Cytochrome c oxidase<br>subunit Va)                               |
| Supercontig_1.37_MV<br>LG_03758_7sp  | -2081,50 | -2081,12 | 0,76                         | 0,32                         | NS | 0 | ☐ | ☐ | ☐ | ☐ | hypothetical protein               | NA         | NA                                                                      |
| Supercontig_1.37_MV<br>LG_03726_6sp  | -502,69  | -502,06  | 1,26                         | 0,47                         | NS | 0 | ☐ | ☐ | ☐ | ☐ | hypothetical protein               | PF00578.14 | AhpC-TSA(AhpC/TSA family)                                               |

D

|                                                                            | Autosomal | NRR | PARs |
|----------------------------------------------------------------------------|-----------|-----|------|
| Number of POGs with at least one significant site under positive selection | 240       | 12  | 3    |
| Total number of POGs analyzed                                              | 5453      | 196 | 69   |

|                  |     |     |     |
|------------------|-----|-----|-----|
| <b>Ratio (%)</b> | 4,4 | 6,1 | 4,3 |
|------------------|-----|-----|-----|
