# Supplementary material for: Degeneration of the Nonrecombining Regions in the Mating-Type Chromosomes of the Anther-Smut Fungi
Source: PubMed Central journal article supplement — Mol Biol Evol. 2014 Dec 21;32(4):928–43. doi: 10.1093/molbev/msu396 (PMC4379399; doi:10.1093/molbev/msu396), 2014-12-21
Supplement: supp_msu396_TableS2_primer_sexgenes_Mv-CORR.pdf [file supp_msu396_TableS2_primer_sexgenes_Mv-CORR.pdf]

**Table S2A.** Primers designed in the non-recombining regions of mating type chromosomes (NRR) for checking the loss of the genes without expression in one of the two mating types of *Microbotryum lychnidis-dioicae*.

| Primer name     | Sequence               | ID of the primer pair indicated in Table S2B |
|-----------------|------------------------|----------------------------------------------|
| MVLG_06358_1_F  | TTTCGATACGACGTAGCCCG   | 1                                            |
| MVLG_06358_1_R  | TTCTTTTTCCCGTCGCTCGA   | 1                                            |
| MVLG_06640_1_F  | GTCGTGATAAGGACCCGCGAT  | 2                                            |
| MVLG_06640_1_R  | ACGGTCTTGTTTTTCGCACG   | 2                                            |
| comp5283_A1_F   | TACTGCTGCTGTAAACACCGG  | 3                                            |
| comp5283_A1_R   | ATTGAGCAAGAGCCGTGTGA   | 3                                            |
| MVLG_07141_1_F  | GGCAGCTCGACAAGTTTTGG   | 4                                            |
| MVLG_07141_1_R  | AGACGCCTAGGTTTCAAGGC   | 4                                            |
| MVLG_07187_4_F  | CAAGGGCCTTCAACTCGTCA   | 5                                            |
| MVLG_07187_4_R  | ACCAAATCGCTCAACTGGGT   | 5                                            |
| MVLG_06929_F    | ATCTCCCTAGCTCCGCCTAG   | 6                                            |
| MVLG_06929_R    | GGATGAACGCCGACAACATG   | 6                                            |
| comp8984_A1_F   | CAGGGCCAGGTGTGTTAAGA   | 7                                            |
| comp8984_A1_R   | TTACAGTGACTCCTGCACGC   | 7                                            |
| MVLG_06190_F    | CTTGGCACTCCTTGCGAAC    | 8                                            |
| MVLG_06190_R    | GAGTGGTCCGACCTGACATG   | 8                                            |
| comp2378_A1_F   | AGACGTTCAAAGCGTCTCCTC  | 9                                            |
| comp2378_A1_R   | TGCGCGTGGTTCTAGTTCAA   | 9                                            |
| comp7541_A1_F   | TACTGGAGGTCCTCGACGTT   | 10                                           |
| comp7541_A1_R   | GAAAGGCCTTGACCTCTCC    | 10                                           |
| MVLG_06927_F    | GCCGTGCTTCCAAGACTTTG   | 11                                           |
| MVLG_06927_R    | ACCGCTCACTCTTTCTG      | 11                                           |
| comp4640_A2_F   | CCTTTGTACCAGGTCCCGTC   | 12                                           |
| comp4640_A2_R   | CTATGGACACCGTACCGAGC   | 12                                           |
| comp5017_A2_F   | CCGACTTCAAACGACTCGGA   | 13                                           |
| comp5017_A2_R   | TGTAACGGGCTTTGCGTTTG   | 13                                           |
| comp7018_A2_F   | TAGAGTATCGCCTGCCGGTA   | 14                                           |
| comp7018_A2_R   | GGCGCCAGTAGGTC AATTGA  | 14                                           |
| comp7032_A2_F   | CGAGACCGACACCGATACAG   | 15                                           |
| comp7032_A2_R   | CCAGCTTCTGATGCAAGGGA   | 15                                           |
| comp8195_A2_F   | GCCGAACGAGATCGATCCTT   | 16                                           |
| comp8195_A2_R   | CTCCTCCGCGACTCTTGATC   | 16                                           |
| comp4356_A2_F   | TCTGCTCCGAGACTTCTACC   | 17                                           |
| comp4356_A2_R   | AAGTGCACAAGAGACGGGAG   | 17                                           |
| comp7143_2_A2_F | GTACCAACCGTACCTCCTG    | 18                                           |
| comp7143_2_A2_R | CGTGCGTTGCAAAATGTGTG   | 18                                           |
| comp8741_A2_F   | TTGTCATCAAGGCTGCTGCT   | 19                                           |
| comp8741_A2_R   | CCATGATGCATCATTGACGTCC | 19                                           |
| comp7032_1_F    | CGAGACCGACACCGATACAG   | 20                                           |
| comp7032_1_R    | TCCAGCTTCTGATGCAAGGG   | 20                                           |
| comp8195_1_F    | GATCAAGAGTCGCGGAGGAG   | 21                                           |
| comp8195_1_R    | AGTCTCTCACTGATCCCC     | 21                                           |
| 5017_0_F        | TCCTCGACTCAACCCCTCAT   | 22                                           |
| 5017_0_R        | CGAACCCAGTCCCTCTTTGA   | 22                                           |
| 5017_1_F        | TCAAAGAGGGACGTGGTTG    | 23                                           |
| 5017_1_R        | GCCGAACGGTACAATTGCTC   | 23                                           |

**Table S2B:** Amplification of different primer pairs in A1 or A2 haploid strains of different *Microbotryum* species. The primer pair 660 amplifies in a1 strains while the primer pair 588 amplifies in a2 strains (Devier et al. 2009). The other primer pairs correspond to the genes lost in a1 or a2 of the Lamole strains (primers in Table S2A). A "X" means that an amplicon was obtained.

| Species                     | Strain             | Primer pair |     |   |   |   |   |   |   |   |   |   |    |    |    |    |    |    |    |    |    |    |    |    |    |    |   |
|-----------------------------|--------------------|-------------|-----|---|---|---|---|---|---|---|---|---|----|----|----|----|----|----|----|----|----|----|----|----|----|----|---|
|                             |                    | 660         | 588 | 1 | 2 | 3 | 4 | 5 | 6 | 7 | 8 | 9 | 10 | 11 | 12 | 13 | 14 | 15 | 16 | 17 | 18 | 19 | 20 | 21 | 22 | 23 |   |
| <i>M. lychnidis-dioicae</i> | Lamole a2          | X           |     |   |   |   |   |   |   |   |   |   |    |    |    | X  | X  | X  | X  | X  | X  | X  | X  | X  | X  | X  | X |
| <i>M. lychnidis-dioicae</i> | SI 40-01 a2        | X           |     |   |   |   |   |   |   |   |   |   |    |    |    | X  | X  | X  | X  | X  | X  | X  | X  | X  | X  | X  | X |
| <i>M. lychnidis-dioicae</i> | SI IT.00 a2        | X           |     |   |   |   |   |   |   |   |   |   |    |    |    | X  | X  | X  | X  | X  | X  | X  | X  | X  | X  | X  | X |
| <i>M. lychnidis-dioicae</i> | SI 41.06 a2        | X           |     |   |   |   |   |   |   |   |   |   |    |    |    | X  | X  | X  | X  | X  | X  | X  | X  | X  | X  | X  | X |
| <i>M. lychnidis-dioicae</i> | SI sesto Cal a2    | X           |     |   |   |   |   |   |   |   |   |   |    |    |    | X  | X  | X  | X  | X  | X  | X  | X  | X  | X  | X  | X |
| <i>M. lychnidis-dioicae</i> | SI svA 03 a2       | X           |     |   |   |   |   |   |   |   |   |   |    |    |    | X  | X  | X  | X  | X  | X  | X  | X  | X  | X  | X  | X |
| <i>M. lychnidis-dioicae</i> | SI 100.10 a2       | X           |     |   |   |   |   |   |   |   |   |   |    |    |    | X  | X  | X  | X  | X  | X  | X  | X  | X  | X  | X  | X |
| <i>M. lychnidis-dioicae</i> | SL 139.01 a2       | X           |     |   |   |   |   |   |   |   |   |   |    |    |    | X  | X  | X  | X  | X  | X  | X  | X  | X  | X  | X  | X |
| <i>M. lychnidis-dioicae</i> | SI Alpes 100.01 a2 | X           |     |   |   |   |   |   |   |   |   |   |    |    |    | X  | X  | X  | X  | X  | X  | X  | X  | X  | X  | X  | X |
| <i>M. lychnidis-dioicae</i> | Lamole A1          | X           | X   | X | X | X | X | X | X | X | X | X | X  | X  |    |    |    |    |    |    |    |    |    |    |    |    |   |
| <i>M. lychnidis-dioicae</i> | SI 00 site 14 - a1 | X           |     |   | X | X | X | X | X | X | X | X | X  | X  |    |    |    |    |    |    |    |    |    |    |    |    |   |
| <i>M. lychnidis-dioicae</i> | SI 39.04 a1        | X           | X   | X | X | X | X | X | X | X | X | X | X  | X  |    | X  | X  |    |    |    |    |    |    |    |    |    |   |
| <i>M. lychnidis-dioicae</i> | SI UK 00 - a1      | X           | X   | X | X | X | X | X | X | X | X | X | X  | X  |    | X  |    |    |    |    |    |    |    |    |    |    |   |
| <i>M. lychnidis-dioicae</i> | SI 124.2 a1        | X           | X   | X | X | X | X | X | X | X | X | X | X  | X  |    |    |    |    |    |    |    |    |    |    |    |    |   |
| <i>M. lychnidis-dioicae</i> | SI 824.3 a1        | X           | X   | X | X | X | X | X | X | X | X | X | X  | X  |    |    |    | X  |    |    |    |    |    |    |    |    |   |
| <i>M. silenes-dioicae</i>   | Sd H3 a1           | X           | X   | X | X | X | X | X | X | X | X | X | X  | X  |    | X  | X  |    |    |    |    |    |    |    |    |    |   |
| <i>M. silenes-dioicae</i>   | Sd 949 a1          | X           | X   | X | X | X | X | X | X | X | X | X | X  | X  |    | X  | X  |    |    |    |    |    |    |    |    |    |   |
| <i>M. silenes-dioicae</i>   | Sd 15.02 - A1      | X           | X   | X | X | X | X | X | X | X | X | X | X  | X  |    | X  |    |    |    |    |    |    |    |    |    |    |   |
| <i>M. silenes-dioicae</i>   | Sd-b Bretagne A1   | X           | X   | X | X | X | X | X | X | X | X | X | X  | X  |    | X  | X  |    |    |    |    |    |    |    |    |    |   |
| <i>M. silenes-dioicae</i>   | Sd 900.12 A1       | X           | X   | X | X | X | X | X | X | X | X | X | X  | X  |    | X  | X  | X  |    |    |    |    |    |    |    |    |   |
